# Supplementary material for: Fibroblasts derived from oesophageal adenocarcinoma differ in DNA methylation profile from normal oesophageal fibroblasts
Source: PubMed Central journal article supplement (PMC5469830; doi:10.1038/s41598-017-03501-6), 2017-06-13
Supplement: 41598_2017_3501_MOESM1_ESM.pdf [file 41598_2017_3501_MOESM1_ESM.pdf]

**Fibroblasts derived from oesophageal adenocarcinoma differ in DNA methylation profile from normal oesophageal fibroblasts**

**Authors:** Eric Smith, Helen M. Palethorpe, Annette L. Hayden, Joanne P. Young, Timothy J. Underwood, Paul A. Drew

| Supplementary Table S1 |       |       |        |     |             |                        |                        |                        |                        |                                    |                    |                        |                        |                        |                |                     |                           |                         |                                        |          |                   |                    |                     |                 |
|------------------------|-------|-------|--------|-----|-------------|------------------------|------------------------|------------------------|------------------------|------------------------------------|--------------------|------------------------|------------------------|------------------------|----------------|---------------------|---------------------------|-------------------------|----------------------------------------|----------|-------------------|--------------------|---------------------|-----------------|
| Patient Number         | TDF   | NDF   | Gender | Age | Tumour Type | Tumour Differentiation | Pretreatment T Staging | Pretreatment N Staging | Pretreatment M Staging | Curative Treatment Modality        | Radiology Response | Pathological T Staging | Pathological N Staging | Pathological M Staging | Positive Nodes | Total Nodes Counted | Proximal Resection Margin | Distal Resection Margin | Circumferential Resection Margin (CRM) | CRM (mm) | Vascular Invasion | Lymphatic Invasion | Perineural Invasion | Tumour Location |
| 18                     |       | N.18  | Male   | 63  | AC          | G2                     | T3                     | N1                     | M0                     | Neoadjuvant Chemotherapy + Surgery | Partial Response   | T2                     | N0                     | M0                     | 0              | 35                  | No                        | No                      | No                                     | Clear    | No                | No                 | No                  | OGJ-S2          |
| 23                     |       | N.23  | Male   | 65  | AC          | G3                     | T3                     | N1                     | M0                     | Neoadjuvant Chemotherapy + Surgery | Complete Response  | T2                     | N0                     | M0                     | 0              | 16                  | No                        | No                      | No                                     | 20       | No                | No                 | No                  | OGJ-S2          |
| 32                     |       | N.32  | Female | 68  | SCC         | G2                     | T3                     | N1                     | M0                     | Neoadjuvant Chemotherapy + Surgery | Partial Response   | T2                     | N0                     | M0                     | 0              | 17                  | No                        | No                      | No                                     | 1        | No                | No                 | No                  | Lower 1/3       |
| 38                     |       | N.38  | Male   | 66  | AC          | G1                     | T3                     | N1                     | M0                     | Neoadjuvant Chemotherapy + Surgery | Partial Response   | T2                     | N0                     | M0                     | 0              | 21                  | No                        | No                      | No                                     | 13       | Yes               | Yes                | No                  | OGJ-S1          |
| 50                     |       | N.50  | Female | 57  | AC          | G2                     | T3                     | N0                     | M0                     | Neoadjuvant Chemotherapy + Surgery | Partial Response   | T2                     | N0                     | M0                     | 0              | 17                  | No                        | No                      | No                                     | 8        | No                | No                 | No                  | Lower 1/3       |
| 55                     | T.55  |       | Male   | 61  | AC          | G2                     | T3                     | N1                     | M0                     | Neoadjuvant Chemotherapy + Surgery | Partial Response   | T3                     | N3                     | M0                     | 13             | 38                  | No                        | No                      | Yes                                    | <1       | Yes               | No                 | Yes                 | Lower 1/3       |
| 59                     | T.59  |       | Male   | 71  | AC          | G3                     | T3                     | N1                     | M0                     | Neoadjuvant Chemotherapy + Surgery | Partial Response   | T3                     | N3                     | M0                     | 7              | 18                  | No                        | No                      | No                                     | Clear    | Yes               | No                 | No                  | OGJ-S1          |
| 64                     | T.64  |       | Male   | 70  | AC          | G3                     | T3                     | N0                     | M0                     | Neoadjuvant Chemotherapy + Surgery | Partial Response   | T1                     | N0                     | M0                     | 0              | 11                  | No                        | No                      | No                                     | 9.5      | No                | No                 | No                  | OGJ-S1          |
| 108                    | T.108 | N.108 | Male   | 63  | AC          | G3                     | T3                     | N1                     | M0                     | Neoadjuvant Chemotherapy + Surgery | Partial Response   | T3                     | N0                     | M0                     | 0              | 22                  | No                        | No                      | No                                     | 7        | Yes               | No                 | Yes                 | OGJ-S2          |
| 109                    | T.109 |       | Female | 79  | AC          | G3                     | T3                     | N1                     | M0                     | Surgery only                       |                    | T3                     | N1                     | M0                     | 2              | 34                  | No                        | No                      | No                                     | 1        | No                | No                 | No                  | Lower 1/3       |
| 181                    |       | N.181 | Male   | 63  | AC          | G3                     | T2                     | N0                     | M0                     | Surgery only                       |                    | T1                     | N0                     | M0                     | 0              | 13                  | No                        | No                      | No                                     | 11       | No                | No                 | No                  | OGJ-S2          |
| 205                    | T.205 | N.205 | Male   | 64  | AC          | G1                     | T1                     | N0                     | M0                     | Surgery only                       |                    | T IS/HGD               | N0                     | M0                     | 0              | 28                  | No                        | No                      | No                                     |          | No                | No                 | No                  | Lower 1/3       |
| 217                    | T.217 | N.217 | Male   | 58  | AC          | G2                     | T2                     | N0                     | M0                     | Surgery only                       |                    | T3                     | N3                     | M0                     | 15             | 27                  | No                        | No                      | Yes                                    | 1        | No                | No                 | No                  | Lower 1/3       |
| 251                    | T.251 | N.251 | Male   | 82  | AC          | G2                     | T3                     | N1                     | M0                     | Surgery only                       |                    | T3                     | N0                     | M0                     | 0              | 26                  | No                        | No                      | Yes                                    | <1       | No                | No                 | Yes                 | OGJ-S2          |
| 255                    | T.255 | N.255 | Male   | 64  | AC          | G3                     | T3                     | N1                     | M0                     | Neoadjuvant Chemotherapy + Surgery | Partial Response   | T3                     | N0                     | M0                     | 0              | 45                  | No                        | No                      | Yes                                    | 0        | No                | No                 | Yes                 | OGJ-S2          |
| 528                    | T.528 | N.528 | Male   | 76  | AC          | G2                     | T2                     | N1                     | M0                     | Neoadjuvant Chemotherapy + Surgery |                    | T2                     | N1                     | M0                     | 2              | 36                  | No                        | No                      | No                                     |          | NA                | NA                 | NA                  | OGJ             |

Supplementary Table S2

| All DMC, Biological Processes |                    |           |             |          |          |          |                                                                                                                                                                                                                                                                                                                                                                                                                                                                                                                                                                                                                                                                                                                                                                                                                                                                                                                                                                                                                                                                                                                                                                                                                                                                                                                                                                                                                                                                                                                                                                                                                                                                                                                                                                                                                                                                                                                                                                                                                                                                                                                                                                                                                                                                                                                                                                                                                                                                                                                                                                                                                                                                                                                                                                                                                                                                                                                                                                                                                                                                                                                                                                                                                                                                                                                                                                                                                                                                                                                                                                                                                                                                                                                                                                                                                                                                                                                                                                                                                                                                                                                                             |       |
|-------------------------------|--------------------|-----------|-------------|----------|----------|----------|---------------------------------------------------------------------------------------------------------------------------------------------------------------------------------------------------------------------------------------------------------------------------------------------------------------------------------------------------------------------------------------------------------------------------------------------------------------------------------------------------------------------------------------------------------------------------------------------------------------------------------------------------------------------------------------------------------------------------------------------------------------------------------------------------------------------------------------------------------------------------------------------------------------------------------------------------------------------------------------------------------------------------------------------------------------------------------------------------------------------------------------------------------------------------------------------------------------------------------------------------------------------------------------------------------------------------------------------------------------------------------------------------------------------------------------------------------------------------------------------------------------------------------------------------------------------------------------------------------------------------------------------------------------------------------------------------------------------------------------------------------------------------------------------------------------------------------------------------------------------------------------------------------------------------------------------------------------------------------------------------------------------------------------------------------------------------------------------------------------------------------------------------------------------------------------------------------------------------------------------------------------------------------------------------------------------------------------------------------------------------------------------------------------------------------------------------------------------------------------------------------------------------------------------------------------------------------------------------------------------------------------------------------------------------------------------------------------------------------------------------------------------------------------------------------------------------------------------------------------------------------------------------------------------------------------------------------------------------------------------------------------------------------------------------------------------------------------------------------------------------------------------------------------------------------------------------------------------------------------------------------------------------------------------------------------------------------------------------------------------------------------------------------------------------------------------------------------------------------------------------------------------------------------------------------------------------------------------------------------------------------------------------------------------------------------------------------------------------------------------------------------------------------------------------------------------------------------------------------------------------------------------------------------------------------------------------------------------------------------------------------------------------------------------------------------------------------------------------------------------------------------------|-------|
| ID                            | Description        | GeneRatio | BgRatio     | pvalue   | p.adjust | qvalue   | geneID                                                                                                                                                                                                                                                                                                                                                                                                                                                                                                                                                                                                                                                                                                                                                                                                                                                                                                                                                                                                                                                                                                                                                                                                                                                                                                                                                                                                                                                                                                                                                                                                                                                                                                                                                                                                                                                                                                                                                                                                                                                                                                                                                                                                                                                                                                                                                                                                                                                                                                                                                                                                                                                                                                                                                                                                                                                                                                                                                                                                                                                                                                                                                                                                                                                                                                                                                                                                                                                                                                                                                                                                                                                                                                                                                                                                                                                                                                                                                                                                                                                                                                                                      | Count |
| GO:0008150                    | biological_process | 901/901   | 15230/17046 | 4.38E-46 | 2.61E-42 | 2.05E-42 | AKT3/ABI1/CDH3/TANK/CD300LD/GNE/ZNF783/CDH9/TSPAN5/CDH12/CDH13/SUGP2/MBNL2/FARP1/KLRG1/RCAN2/KCNMB2/CDKN1C/SPEG/BCKDK/TCIRG1/MRVI1/TRDN/ABCA9/SPON2/C1D/COG5/ZBTB18/PITRM1/TACC2/MTHFS/PDPN/DMRT2/CELF1/CELF2/TBR1/SEPT9/GJB6/HCS2/NPFFR2/ADCY3/PNRC1/TMED10/SLC27A2/LECT1/RER1/ESM1/ADAM29/HNRNPUL1/RPP14/HIBADH/CHGA/CH13L1/ERLIN2/PSIP1/CHI3L2/PKP3/EGLN2/TP53TG1/PXMP4/ATXN2L/B4GALT7/PTH2/KIF12/ACOT7/PDAP1/EXOC3/CHRNA1/CHRNA2/ADPRHL1/CHRNA5/CARD16/GPRIN1/SORCS1/ZBED9/CIDEA/C1QTNF7/GBP4/ALPK2/PANX3/RBP7/GALNT15/AP3S1/CLCA1/FAT3/CLN5/ANKRD9/MRPL52/FRMD6/CCR1/SLC51B/C15orf27/ZG16B/SLC38A10/SEZ6/TNFAIP8L1/CNP/AADACL3/APOA1BP/NEU4/COL9A3/COL11A1/GALM/COMP/SCLT1/MAP3K8/ZFP42/ADM/IL31RA/EGFLAM/UBLCP1/HUS1B/OR2A14/CPD/CPM/CPS1/NDUFAF6/PXDNL/CRABP1/ZNF358/TRPM6/CRYBB3/MIB2/PARP4/MPP7/LDLRAD3/FAM101A/B3GLCT/MGAT5B/APCDD1/CSTA/KLC3/ZNF738/CTGF/ABCC13/SMYD1/SGOL1/PPM1L/LRRC34/SH3D19/CYB561/CYLD/MBOAT1/ADRB3/ESCO2/CYP11A1/ZNF782/FITM1/ADAL/TRPV3/ZNF709/ZNF781/CITED4/DBB1/WBP2NL/LONRF2/DDOST/RNF168/ZNF366/BHLHA15/COCH/NLRP6/DIO3/DLG2/DMBT1/DNAH6/DNAH8/DNMT3A/ABAT/DPH1/DRD4/DSG3/DTNA/ECE1/AGXT/EEF2/EFNA2/EGFR/EGR3/PATL2/EIF4G1/A2M/ELK4/ANKRD23/TMEM17/LIPH/EML1/UNC13D/DNAH12/SLC10A4/ENO2/ADCK5/EPHA1/EPHA3/EPHB4/ESR1/ALAS1/F11/FAH/FAT2/SPATA13/PRSS54/FCGR2A/RNF182/PHACTR1/SP8/FGA/FGF10/FHIT/XRN2/RASA3/PPM1E/VASH1/BTBD3/SBNO2/TRAK1/MSRB2/ACIN1/LIMCH1/FOXL1/FOXC2/TBC1D9B/FOXO1/EXPH5/AKR1B1/SPG20/NFASC/EPB41L3/GGA3/FLNB/DIP2A/FLOT2/MLC1/TBC1D1/RHOBTB2/NUP210/ATP11A/NEDD4L/SYNE1/PSD3/LARP1/PPP1R13B/PUM2/ARHGFE18/RYPB/MORC3/MAPK8IP2/TSSK2/VGLL2/MTOR/FUCA1/SLC37A4/GABBR1/RASGEF1C/RNF144B/ZNF549/ST6GALNAC3/DSCR9/GAK/SAMM50/DFNB31/ALS2CL/PNKD/SEC31B/TENM4/ACOT11/LTN1/RGS22/STEAP2/GAS2/FBXL21/FBXL2/LCE2B/SACS/GATM/GBGT1/GAPDHS/PLEK2/SLC17A5/ADGRF1/RPS6KC1/PABPC1/AKAP8L/GJA3/DNAJC2/FGF22/NPTN/GJB2/CLUL1/AMPD2/SDCBP2/PDE7B/DKK3/CYTH4/GLS2/VPS4A/AMPD3/GPR162/DHDH/BMP10/ZNF638/GNAS/ZNF311/CRACR2B/TMPRSS12/PIGW/IZUMO1/ZNF844/THEM5/GPR26/GPER1/EOGT/DOK7/FFAR2/GRB10/MRPS18B/FLVCR1/GRIK4/ZBTB44/DNAJC15/SCG3/GSTP1/GTF2B/BRF1/TMOD4/GUCY1A3/NME7/GPR132/PADI1/GZMA/ANXA2/HAS1/SERPIND1/SOXS8/KCNIP2/NRG1/ANXA6/HK1/HLA-B/HLA-DOA/HLA-DPA1/ANXA13/HLA-E/HLA-F/HLX/HMGA1/NR4A1/ACACB/HPCA/APBA2/HOXB3/HOXC4/HOXC5/HOXC6/HOXD3/AGFG2/HRH1/HSD11B1/HSD17B2/ACADL/HSPA1L/HSP90AA1/HSP90AB1/HTR3A/HTR5A/DUPD1/ADAMTSL5/ANKRD45/TFAP2E/ID3/ZC3H12D/COL28A1/RSP02/FMN1/CD300E/BARHL2/NME9/IGF1/IGF2/CYR61/GPR142/LCE1C/LCE1D/LCE2D/IL1R1/IL1RN/IL6/IL10RA/AQP2/IL11RA/IL12RB2/IL15RA/PRSS41/IL16/FOXK2/AQP5/INHBA/INPP5A/IRF1/AQP9/ISL1/ITGA7/ITGB2/ITGB7/ITIH3/ITIH4/IVL/JUP/CD82/USP50/HILS1/ATP9B/KCNH2/KCNJ8/KCNJ9/KCNMB1/KDR/ACAT1/KIF25/PO5/KRT7/KRT15/AMIGO3/INSC/TOMM20L/HES5/SLC6A17/RESP18/CDHR4/AFF3/LAMA3/STMN1/OR2A5/LCK/LCP1/MUC21/LDLR/ARHGDI4/LGALS9/LHCGR/LLGL1/LMNA/LMO2/RAB19/LOX/SRRD/LPP/LTB/LTBP1/SMAD3/MC2R/MCC/ME1/ME2/MEF2D/MAP3K1/MEOX1/MEOX2/MFI2/MFNG/MGAT1/SCGB2A1/MITF/LHX8/ASGR1/MOCS1/MOV10/MPPZ/PLEKHG7/MT1A/NUDT1/MYH4/MYL2/NUBP1/NDUF84/DRG1/NEDD9/NEU1/ATP1A2/NFATC3/NFYB/NHLH2/NMBR/NOV/NPPC/NRAS/NTF3/OAS2/OPRL1/OR2C1/OR3A2/SLC22A18/P2RY6/PFAH2/ATP5B/IL21R/ANO7/PALM/ARHGFE3/PARK2/SPOCK3/UTP11L/LEF1/DDX47/CEND1/PRR16/CHST15/ANGPT4/PDE4C/PCYOX1/PDE7A/C11orf73/SIRT6/PDE6B/ATP8A2/GALNT7/PGAM2/PI3/PIGC/PIK3CG/PITX2/PKH1/PKM/PLA2G2A/PLAGL1/SPA17/LRP1B/PLEC/PRKAG3/PML/RIPPLY3/FXYD6/GPR84/IL20RB/SLCO1C1/PNLIP/RIPK4/TLR9/TREM1/CYTL1/POMC/SSH1/PON1/RIN2/MOV10L1/POU2AF1/ZDHHC13/APBB1IP/ROBO4/MXRAS8/FBLIM1/BNC2/MED18/PALMD/CYP2W1/RPP25/LPCAT2/BANP/PPP1CB/HERC6/PPP1CC/PIWIL2/ELP3/ARHGFE10L/PRMT6/DNAJC17/GOLPH3L/ZNF532/PPP2R2B/FANCI/MOB1A/SLC47A1/SLC29A3/MIS18BP1/WDR33/TRPV6/SMPD3/SLC30A10/CNOT11/CHRNA9/SYBU/PEX26/LIMS2/FRMD4A/VAC14/CARKD/PARVA/PRKAR1B/TTC17/IFT122/ERMARD/MCTP2/LMBRD1/CSGALNACT1/PAG1/CISD1/PRKD1/WSB2/MYNN/BIN3/APOBR/MAPK3/MAP2K2/PCDHGC4/PCDHGB7/PCDHGB3/PCDHGA11/PRKRIR/PROC/MRAP/TRPV5/PRMT8/MASP1/HTRA1/SLAMF8/CDC42SE1/PSMB4/PAK6/ARNTL2/RGM/A/PRDM11/TRPC7/LPAR5/PSMD7/SLURP1/ACTR3B/PTGFR/PLEKHG5/TENM2/GATAD2B/ERMM/KLHL8/RDH14/METTL14/MARK4/CCAR2/PTPRCAP/PTPRE/PXN/CREBZF/ABHD17C/ | 901   |

|           |                  |         |             |          |          |          |                                                                                                                                                                                                                                                                                                                                                                                                                                                                                                                                                                                                                                                                                                                                                                                                                                                                                                                                                                                                                                                                                                                                                                                                                                                                                                                                                                                                                                                                                                                                                                                                                                                                                                                                                                                                                                                                                                                                                                                                                                                                                                                                                                                                                                                                                                                                                                                                                                                                                                                                                                                                                                                                                                                                                                                                                                                                                                                                                                                                                                                                                                                                                                                                                                                                                                                                                                                                                                                                                                                                                                                                                                                                                                                                                                                                                                                                                                                                                                                                                                                                                                                                                                                                                                                     |     |
|-----------|------------------|---------|-------------|----------|----------|----------|-----------------------------------------------------------------------------------------------------------------------------------------------------------------------------------------------------------------------------------------------------------------------------------------------------------------------------------------------------------------------------------------------------------------------------------------------------------------------------------------------------------------------------------------------------------------------------------------------------------------------------------------------------------------------------------------------------------------------------------------------------------------------------------------------------------------------------------------------------------------------------------------------------------------------------------------------------------------------------------------------------------------------------------------------------------------------------------------------------------------------------------------------------------------------------------------------------------------------------------------------------------------------------------------------------------------------------------------------------------------------------------------------------------------------------------------------------------------------------------------------------------------------------------------------------------------------------------------------------------------------------------------------------------------------------------------------------------------------------------------------------------------------------------------------------------------------------------------------------------------------------------------------------------------------------------------------------------------------------------------------------------------------------------------------------------------------------------------------------------------------------------------------------------------------------------------------------------------------------------------------------------------------------------------------------------------------------------------------------------------------------------------------------------------------------------------------------------------------------------------------------------------------------------------------------------------------------------------------------------------------------------------------------------------------------------------------------------------------------------------------------------------------------------------------------------------------------------------------------------------------------------------------------------------------------------------------------------------------------------------------------------------------------------------------------------------------------------------------------------------------------------------------------------------------------------------------------------------------------------------------------------------------------------------------------------------------------------------------------------------------------------------------------------------------------------------------------------------------------------------------------------------------------------------------------------------------------------------------------------------------------------------------------------------------------------------------------------------------------------------------------------------------------------------------------------------------------------------------------------------------------------------------------------------------------------------------------------------------------------------------------------------------------------------------------------------------------------------------------------------------------------------------------------------------------------------------------------------------------------------------------|-----|
| GO:000987 | cellular process | 827/901 | 13765/17046 | 2.52E-21 | 7.52E-18 | 5.91E-18 | <p>AKT3/ABI1/CDH3/TANK/GNE/ZNF783/CDH9/TSPAN5/CDH12/CDH13/SUGP2/MBNL2/FARP1/KLRG1/RCAN2/KCNMB2/CDKN1C/SPEG/BCKDK/TCIRG1/MRVI1/TRDN/ABCA9/SPON2/C1D/ZBTB18/TACC2/MTHFS/PDPN/DMRT2/CELF1/CELF2/TBR1/SEPT9/GJB6/HGST/NPFFR2/ADCY3/PNRC1/TMED10/SLC27A2/LECT1/RER1/ESM1/HNRRNPUL1/RPP14/HIBADH/CHGA/CHI3L1/ERLIN2/PSIP1/PKP3/EGLN2/TP53TG1/ATXN2L/B4GALT7/PTH2/KIF12/ACOT7/PDAP1/EXOC3/CHRNA1/CHRNA2/ADPRHL1/CHRNA5/CARD16/GPRIN1/SORCS1/ZBED9/CIDEA/C1QTNF7/ALPK2/PANX3/GALNT15/AP3S1/CLCA1/CLN5/ANKRD9/MRPL52/FRMD6/CCR1/SLC51B/C15orf27/SLC38A10/SEZ6/TNFAIP8L1/CNP/APOA1BP/NEU4/COL9A3/COL11A1/COMP/SCLT1/MAP3K8/ZFP42/ADM/IL31RA/EGFLAM/UBLCP1/HUS1B/OR2A14/CP51/NDUF4F6/PXNDL/CRABP1/ZNF358/TRPM6/MIB2/PARP4/MPP7/FAM101A/B3GLCT/MGAT5B/APCDD1/CSTA/KLC3/ZNF738/CTGF/ABCC13/SMYD1/SGOL1/PPM1L/SH3D19/CYB561/CYLD/MBOAT1/ADR83/ESCO2/CYP11A1/ZNF782/FITM1/ADAL/TRPV3/ZNF709/ZNF781/CITED4/DBB1/WBP2NL/DDOST/RNF168/ZNF366/BHLHA15/COCH/NLRP6/DIO3/DLG2/DMBT1/DNAH6/DNAH8/DNMT3A/ABAT/DPH1/DRD4/DSG3/DTNA/ECE1/AGXT/EEF2/EFNA2/EGFR/EGR3/PATL2/EIF4G1/A2M/ELK4/TMEM17/EML1/UNC13D/DNAH12/SLC10A4/ENO2/ADCK5/EPHA1/EPHA3/EPHB4/ESR1/ALAS1/FAH/FAT2/SPATA13/FCGR2A/RNF182/PHACTR1/SP8/FGA/FGF10/FHIT/XRN2/RASA3/PPM1E/VASH1/BTBD3/SBNO2/TRAK1/MSRB2/ACIN1/LIMCH1/FOXL1/FOXC2/FOXO1/EXPH5/AKR1B1/SPG20/NFASC/EPB413/FLNB/DIP2A/FLY/LOT2/MLC1/TBC1D1/RHOBTB2/NUP210/ATP11A/NEDD4L/SYNE1/PSD3/LARP1/PPP1R13B/PUM2/ARHGEF18/RYPB/MORC3/MAPK8IP2/TSSK2/VGLL2/MTOR/SLC37A4/GABBR1/RASGEF1C/RNF144B/ZNF549/ST6GALNAC3/GAK/SAMM50/DFNB31/ALS2CL/PNKD/TENM4/ACOT11/LTN1/RGS22/STEAP2/GAS2/FBXL21/FBXO2/LCE2B/SACS/GATM/GBGT1/GAPDHS/PLEK2/SLC17A5/ADGRF1/RPS6KC1/PABPC1/GJA3/DNAJC2/FGF22/NPTN/GJB2/CLUL1/AMPD2/SDCBP2/PDE7B/DKK3/CYTH4/GLS2/VPS4A/AMPD3/GPR162/BMP10/ZNF638/GNAS/ZNF311/PIGW/IZUMO1/ZNF844/THEM5/GPR26/GPER1/EOGT/DOK7/FFAR2/GRB10/MRPS18B/FLVCR1/GRIK4/ZBTB44/DNAJC15/SCG3/GSTP1/GTF2B/BRF1/TMOD4/GUCY1A3/NME7/GPR132/PADI1/GZMA/ANXA2/HAS1/SERPIND1/SOX8/KCNIP2/NRG1/ANXA6/HK1/HLA-B/HLA-DOA/HLA-DPA1/ANXA13/HLA-E/HLA-F/HLX/HMGA1/NR4A1/ACACB/HPCA/APBA2/HOXB3/HOXC4/HOXC5/HOXC6/HOXC7/HRH1/ACADL/HSPA1L/HSP90AA1/HSP90AB1/HTR3A/HLR5A/DUPD1/TFAP2E/ID3/ZC3H12D/COL28A1/RSPD2/FMN1/BARHL2/NME9/IGF1/IGF2/CYR61/GPR142/LCE1C/LCE1D/LCE2D/IL1R1/IL1RN/IL1L/IL10RA/AQP2/IL11RA/IL12RB2/IL15RA/IL16/FOXK2/AQP5/INHBA/INPP5A/IRF1/AQP9/ISL1/ITGA7/ITGB2/ITGB7/ITIH3/ITIH4/IVL/JUP/CD82/USP50/HILS1/ATP9B/KCNH2/KCNJ8/KCNJ9/KCNMB1/KDR/ACAT1/KIF25/IPO5/KRT7/KRT15/AMIGO3/INSC/HES5/SLC6A17/AFF3/LAMA3/STMN1/OR2A5/LCK/LCP1/MUC21/LDLR/ARHGDI1/LGALS9/LHCGR/LLGL1/LMNA/LMO2/RAB19/LOX/LTB/LTBP1/SMAD3/MC2R/MCC/ME1/ME2/MEF2D/MAP3K1/MEOX1/MEOX2/MFI2/MFNG/MGAT1/SCGB2A1/MITF/LHX8/ASGR1/MOCS1/MOV10/MPZ/PLEKHG7/MT1A/NUDT1/MYH4/MYL2/NUBP1/NDUF4B/DRG1/NEDD9/NEU1/ATP1A2/NFATC3/NFYB/NHLH2/NMBR/NOV/NPPC/NRAS/NTF3/OAS2/OPRL1/OR2C1/OR3A2/SLC22A18/P2RY6/PFAH2/ATP5B/IL21R/ANO7/PALM/ARHGEF3/PARK2/SPOCK3/UTP11L/LEF1/DDX47/CEND1/PRR16/CHST15/ANGPT4/PDE4C/PCYOX1/PDE7A/C11orf73/SIRT6/PDE6B/ATP8A2/GALNT7/PGAM2/PI3/PIGC/PIK3CG/PITX2/PKHD1/PKM/PLA2G2A/PLAGL1/SPA17/PLEC/PRKAG3/PML/RIPPLY3/FXYD6/GPR84/IL20RB/SLCO1C1/PNLIIP/RIPK4/TLR9/TREM1/CYTL1/POMC/SSH1/PON1/RIN2/MOV10L1/POU2AF1/ZDHH13/APBB1P/ROBO4/MXRA8/FBLIM1/BNC2/MED18/PALMD/CYP2W1/RPP25/LPCAT2/BANP/PPP1CB/HERC6/PPP1CC/PIWIL2/ELP3/ARHGEF10L/PRMT6/DNAJC17/GOLPH3L/ZNF532/PPP2R2B/FANCI/MOB1A/SLC47A1/SLC29A3/MIS18BP1/WDR33/TRPV6/SMPD3/SLC30A10/CNOT11/CHRNA9/SYBU/PEX26/LIMS2/FRMD4A/VAC14/PARVA/PRKAR1B/TTC17/IFT122/MCTP2/LMBRD1/CSGALNACT1/PAG1/CISD1/PRKD1/WSB2/MYNN/BIN3/APOBR/MAPK3/MAP2K2/PRKRIR/PROC/MRAP/TRPV5/PRMT8/MASP1/HTRA1/SLAMF8/CDC42SE1/PSMB4/PAK6/ARNTL2/RGMA/PRDM11/TRPC7/LPAR5/PSMD7/SLURP1/ACTR3B/PTGFR/PLEKHG5/TENM2/GATAD2B/ERMN/KLHL8/RDH14/METTL4/MARK4/CCAR2/PTPRE/PXN/CREBZF/FAM60A/ACTA2/RASGRF2/RFC2/TRIM27/RGR/RGS12/RIT2/EXOC4/RPA3/RPL8/RPL29/S100A4/S100A6/BGLAP/SCT/CCL11/CCL17/MRPS14/NPAS3/PARVG/NOD2/STRA6/SFRP2/CXCR5/MAP1LC3B2/ARHGAP9/TRA2B/GZF1/DNAI2/SGK1/MICAL1/CERK/TMEM237/VPS33A/BMP4/SLC4A1/ZNF649/SLC6A12/SLC8A1/SLC9A3/SLC20A2/BMPR1B/SLIT1/BRD9/ZSCAN18/BOK/SOX9/BPI/SRP68/STAT2/STK3/STK10/SUPT6H/BST2/VAMP2/TAF4B/TBP/TCEA1/TCEB2/ZEB1/ACTC1/TEAD3/TERF1/TGM2/TCHH/TIMP3/TLE3/TLR5/TRAPPC10/TNFAIP3/TNFRSF1A/TNX</p> | 827 |
|-----------|------------------|---------|-------------|----------|----------|----------|-----------------------------------------------------------------------------------------------------------------------------------------------------------------------------------------------------------------------------------------------------------------------------------------------------------------------------------------------------------------------------------------------------------------------------------------------------------------------------------------------------------------------------------------------------------------------------------------------------------------------------------------------------------------------------------------------------------------------------------------------------------------------------------------------------------------------------------------------------------------------------------------------------------------------------------------------------------------------------------------------------------------------------------------------------------------------------------------------------------------------------------------------------------------------------------------------------------------------------------------------------------------------------------------------------------------------------------------------------------------------------------------------------------------------------------------------------------------------------------------------------------------------------------------------------------------------------------------------------------------------------------------------------------------------------------------------------------------------------------------------------------------------------------------------------------------------------------------------------------------------------------------------------------------------------------------------------------------------------------------------------------------------------------------------------------------------------------------------------------------------------------------------------------------------------------------------------------------------------------------------------------------------------------------------------------------------------------------------------------------------------------------------------------------------------------------------------------------------------------------------------------------------------------------------------------------------------------------------------------------------------------------------------------------------------------------------------------------------------------------------------------------------------------------------------------------------------------------------------------------------------------------------------------------------------------------------------------------------------------------------------------------------------------------------------------------------------------------------------------------------------------------------------------------------------------------------------------------------------------------------------------------------------------------------------------------------------------------------------------------------------------------------------------------------------------------------------------------------------------------------------------------------------------------------------------------------------------------------------------------------------------------------------------------------------------------------------------------------------------------------------------------------------------------------------------------------------------------------------------------------------------------------------------------------------------------------------------------------------------------------------------------------------------------------------------------------------------------------------------------------------------------------------------------------------------------------------------------------------------------------------|-----|

|            |                         |         |             |          |          |          |                                                                                                                                                                                                                                                                                                                                                                                                                                                                                                                                                                                                                                                                                                                                                                                                                                                                                                                                                                                                                                                                                                                                                                                                                                                                                                                                                                                                                                                                                                                                                                                                                                                                                                                                                                                                                                                                                                                                                                                                                                                                                                                                                                                                                                                                                                                                                                                                                                                                                                                                                                                                                                                                                                                                                                                                                                                                                                                                                                                                                                                                                                                                                                                                                                                                                                                                                                                                                                                                                                                                                                                                                                                                                                                                                                                                                                                                                                                                                                                                                                                                                                                                                                                                                   |     |
|------------|-------------------------|---------|-------------|----------|----------|----------|-------------------------------------------------------------------------------------------------------------------------------------------------------------------------------------------------------------------------------------------------------------------------------------------------------------------------------------------------------------------------------------------------------------------------------------------------------------------------------------------------------------------------------------------------------------------------------------------------------------------------------------------------------------------------------------------------------------------------------------------------------------------------------------------------------------------------------------------------------------------------------------------------------------------------------------------------------------------------------------------------------------------------------------------------------------------------------------------------------------------------------------------------------------------------------------------------------------------------------------------------------------------------------------------------------------------------------------------------------------------------------------------------------------------------------------------------------------------------------------------------------------------------------------------------------------------------------------------------------------------------------------------------------------------------------------------------------------------------------------------------------------------------------------------------------------------------------------------------------------------------------------------------------------------------------------------------------------------------------------------------------------------------------------------------------------------------------------------------------------------------------------------------------------------------------------------------------------------------------------------------------------------------------------------------------------------------------------------------------------------------------------------------------------------------------------------------------------------------------------------------------------------------------------------------------------------------------------------------------------------------------------------------------------------------------------------------------------------------------------------------------------------------------------------------------------------------------------------------------------------------------------------------------------------------------------------------------------------------------------------------------------------------------------------------------------------------------------------------------------------------------------------------------------------------------------------------------------------------------------------------------------------------------------------------------------------------------------------------------------------------------------------------------------------------------------------------------------------------------------------------------------------------------------------------------------------------------------------------------------------------------------------------------------------------------------------------------------------------------------------------------------------------------------------------------------------------------------------------------------------------------------------------------------------------------------------------------------------------------------------------------------------------------------------------------------------------------------------------------------------------------------------------------------------------------------------------------------------|-----|
| GO:0044699 | single-organism process | 770/901 | 12449/17046 | 3.78E-20 | 7.51E-17 | 5.91E-17 | <p>AKT3/ABI1/CDH3/TANK/GNE/CDH9/TSPAN5/CDH12/CDH13/FARP1/KLRG1/RCAN2/KCNMB2/CDKN1C/SPEG/BCKDK/TCIRG1/MRV11/TRDN/ABCA9/SPON2/C1D/COG5/ZBTB18/TAC2/MTHFS/PDPN/DMRT2/CELF1/CELF2/TBR1/SEPT9/GJB6/HCST/NPFFR2/ADCY3/TMED10/SLC27A2/LECT1/RER1/ESM1/ADAM29/HIBADH/CHGA/CH13L1/ERLIN2/PKP3/EGLN2/B4GALT7/PTH2/KIF12/ACOT7/PDAP1/EXOC3/CHRNA1/CHRNA2/CHRNA5/CARD16/GPRIN1/SORCS1/CIDEA/PANX3/GALNT15/AP3S1/CLCA1/FAT3/CLN5/ANKRD9/MRPL52/FRMD6/CCR1/SLC51B/C15orf27/ZG16B/SLC38A10/SEZ6/TNFAIP8L1/CNP/APOA1BP/NEU4/COL9A3/COL11A1/GALM/COMP/SCLT1/MAP3K8/ZFP42/ADM/IL13RA/EGFLAM/HUS1B/OR2A14/CP51/NDUFAF6/PXDNL/CRABP1/ZNF358/TRPM6/CRYBB3/MIB2/PARP4/MPP7/FAM101A/B3GLCT/MGAT5B/APCDD1/CSTA/KLC3/CTGF/ABCC13/SMYD1/SGOL1/PPM1L/SH3D19/CYB561/CYLD/MBOAT1/ADRB3/ESCO2/CYP11A1/FITM1/ADAL/TRPV3/DOB1/WBP2NL/DDOST/RNF168/ZNF366/BHLHA15/COCH/NLRP6/DIO3/DLG2/DMBT1/DNAH6/DNAH8/DNMT3A/ABAT/DPH1/DRD4/DSG3/DTNA/ECE1/AGXT/EEF2/EFNA2/EGFR/EGR3/EIF4G1/A2M/ELK4/TMEM17/LIPH/EML1/UNC13D/DNAH12/SLC10A4/ENO2/EPHA1/EPHA3/EPHB4/ESR1/ALAS1/F11/FAH/FAT2/SPATA13/FCGR2A/PHACTR1/SP8/FGA/FGF10/FHIT/XRN2/RASA3/PPM1E/VASH1/BTBD3/SBNO2/TRAK1/MSRB2/ACIN1/LIMCH1/FOXL1/FOXC2/FOXO1/EXPH5/AKR1B1/SPG20/NFASC/EPB41L3/FLNB/DIP2A/FLOT2/MLC1/RHOBTB2/NUP210/ATP11A/NEDD4/SYNE1/PSD3/LARP1/PPP1R13B/PUM2/ARHGEF18/RYPB/MORC3/MAPK8IP2/TSSK2/VGLL2/MTOR/FUCA1/SLC37A4/GABBR1/RASGEF1C/RNF144B/ST6GALNAC3/GAK/SAMM50/DFNB31/ALS2CL/PNKD/TENM4/ACOT11/RGS22/STEAP2/GAS2/FBXO2/LCE2B/GATM/GBGT1/GAPDHS/PLEK2/SLC17A5/ADGRF1/RPS6KC1/PABPC1/GJA3/FGF22/NPTN/GJB2/CLUL1/AMPD2/SDCBP2/PDE7B/DKK3/CYTH4/GLS2/VPS4A/AMPD3/GPR162/DHHDH/BMP10/GNAS/CRACR2B/PIGW/IZUMO1/THEM5/GPR26/GPER1/EOGT/FFAR2/GRB10/MRPS18B/FLVCR1/GRIK4/DNAJC15/SCG3/GSTP1/TMOD4/GUCY1A3/NME7/GPR132/PAD11/GZMA/ANXA2/HAS1/SERPIND1/SOX8/KCNIP2/NRG1/ANXA6/HK1/HLA-B/HLA-DOA/HLA-DPA1/ANXA13/HLA-E/HLA-F/HLX/HMGA1/NR4A1/ACACB/HPCA/APBA2/HOXB3/HOXC4/HOXC5/HOXC6/HOXC7/HRH1/HSD11B1/HSD17B2/ACADL/HSPA1L/HSP90AA1/HSP90AB1/HTR3A/HTR5A/TFAP2E/ID3/ZC3H12D/COL28A1/RSPO2/FMN1/BARHL2/NME9/IGF1/IGF2/CYR61/GPR142/LCE1C/LCE1D/LCE2D/IL1R1/IL1RN/IL6/IL10RA/AQP2/IL11RA/IL12RB2/IL15RA/IL16/FOXK2/AQP5/INHBA/INPP5A/IRF1/AQP9/ISL1/ITGA7/ITGB2/ITGB7/IVL/JUP/CD82/USP50/HILS1/ATP9B/KCNH2/KCNJ8/KCNJ9/KCNMB1/KDR/ACAT1/KIF25/IPO5/KRT15/AMIGO3/INSC/TOMM20L/HES5/SLC6A17/RESP18/AFF3/LAMA3/STMN1/OR2A5/LCK/LCP1/MUC21/LDLR/ARHGDI1/LGALS9/LHCGR/LLGL1/LMNA/LMO2/RAB19/LOX/LTB/LTBP1/SMAD3/MC2R/MCC/ME1/ME2/MEF2D/MAP3K1/MEOX1/MEOX2/MFI2/MFNG/MGAT1/SCGB2A1/MITF/LHX8/ASGR1/MOCS1/MOV10/MPZ/PLEKHG7/NUDT1/MYH4/MYL2/NUBP1/NDUFB4/DRG1/NEDD9/NEU1/ATP1A2/NFATC3/NFYB/NHLH2/NMBR/NOV/NPPC/NRAS/NTF3/OAS2/OPRL1/OR2C1/OR3A2/SLC22A18/P2RY6/PAFAH2/ATP5B/IL21R/ANO7/PALM/ARHGEF3/PARK2/SPOCK3/UTP11L/LEF1/DDX47/CEND1/PRR16/CHST15/ANGPT4/PDE4C/PCYOX1/PDE7A/C11orf73/SIRT6/PDE6B/ATP8A2/GALNT7/PGAM2/PIGC/PIK3CG/PITX2/PKHD1/PKM/PLA2G2A/PLAGL1/SPA17/PLEC/PRKAG3/PML/RIPPLY3/FXYD6/GPR84/IL20RB/SLCO1C1/PNLIP/RIPK4/TLR9/TREM1/CYTL1/POMC/SSH1/PON1/RIN2/MOV10L1/ZDHC13/APBB1IP/ROBO4/MXRA8/FBLIM1/BNC2/PALMD/CYP2W1/LPCAT2/BANP/PPP1CB/HERC6/PPP1CC/PIWIL2/ELP3/ARHGEF10L/PRMT6/GOLPH3L/PPP2R2B/FANCI/MOB1A/SLC47A1/SLC29A3/MIS18BP1/WDR33/TRPV6/SMPD3/SLC30A10/CNOT11/CHRNA9/SYBU/PEX26/LIMS2/FRMD4A/VAC14/PARVA/PRKAR1B/TTC17/IFT122/ERMARD/MCTP2/LMBRD1/CSGALNACT1/PAG1/CISD1/PRKD1/WSB2/BIN3/APOBR/MAPK3/MAP2K2/PRKRIR/PROC/MRAP/TRPV5/PRMT8/MASP1/HTRA1/SLAMF8/CDC42SE1/PSMB4/PAK6/RGMA/TRPC7/LPAR5/PSMD7/SLURP1/ACTR3B/P TGFR/PLEKHG5/TENM2/ERMN/RDH14/METTL14/MARK4/CCAR2/PTPRE/PXN/FAM60A/ACTA2/RASGRF2/RFC2/TRIM27/RGR/RGS12/RIT2/EXOC4/RPA3/RPL8/RPL29/S100A4/S100A6/BGLAP/SCT/CCL11/CCL17/ABHD4/MRPS14/NPAS3/PARVG/NOD2/TINAGL1/STRA6/SFRP2/CXCR5/ARHGAP9/TRA2B/GZF1/DNAI2/SGK1/MICAL1/CERK/TMEM237/VPS33A/BMP4/SLC4A1/SLC6A12/SLC8A1/SLC9A3/SLC20A2/BMPR1B/SLIT1/BOK/SOX9/BPI/SRP68/STAT2/STK3/STK10/SUPT6H/BST2/VAMP2/TAFA4B/TBP/TCEA1/ZEB1/ACTC1/TEAD3/TERF1/TGM2/TCHH/TIMP3/TLE3/TLR5/TRAPP10/TNFAIP3/TNFRSF1A/TNXB/TRA1/TRA5/TRPC4/TRPC6/TRPM2/PHLDA2/TWIST1/CCR2/TNFRSF4/UCP1/UPP1/VARS/WNT10B/YWHAG/ZA P70/ZNF7/CA7/CACNA1E/PTP4A1/CACNB2/MOGS/PAX8/CXCR4/FZD5/RAB7A/CARD14/PPDPF/GDPD3/BCL2L1/LST1/CERS4/TMEM204/NLRX1/CSPP1/EPHX3/CALD1/FAM188A/G</p> | 770 |
|------------|-------------------------|---------|-------------|----------|----------|----------|-------------------------------------------------------------------------------------------------------------------------------------------------------------------------------------------------------------------------------------------------------------------------------------------------------------------------------------------------------------------------------------------------------------------------------------------------------------------------------------------------------------------------------------------------------------------------------------------------------------------------------------------------------------------------------------------------------------------------------------------------------------------------------------------------------------------------------------------------------------------------------------------------------------------------------------------------------------------------------------------------------------------------------------------------------------------------------------------------------------------------------------------------------------------------------------------------------------------------------------------------------------------------------------------------------------------------------------------------------------------------------------------------------------------------------------------------------------------------------------------------------------------------------------------------------------------------------------------------------------------------------------------------------------------------------------------------------------------------------------------------------------------------------------------------------------------------------------------------------------------------------------------------------------------------------------------------------------------------------------------------------------------------------------------------------------------------------------------------------------------------------------------------------------------------------------------------------------------------------------------------------------------------------------------------------------------------------------------------------------------------------------------------------------------------------------------------------------------------------------------------------------------------------------------------------------------------------------------------------------------------------------------------------------------------------------------------------------------------------------------------------------------------------------------------------------------------------------------------------------------------------------------------------------------------------------------------------------------------------------------------------------------------------------------------------------------------------------------------------------------------------------------------------------------------------------------------------------------------------------------------------------------------------------------------------------------------------------------------------------------------------------------------------------------------------------------------------------------------------------------------------------------------------------------------------------------------------------------------------------------------------------------------------------------------------------------------------------------------------------------------------------------------------------------------------------------------------------------------------------------------------------------------------------------------------------------------------------------------------------------------------------------------------------------------------------------------------------------------------------------------------------------------------------------------------------------------------------------|-----|

|            |                                  |         |             |          |          |          |                                                                                                                                                                                                                                                                                                                                                                                                                                                                                                                                                                                                                                                                                                                                                                                                                                                                                                                                                                                                                                                                                                                                                                                                                                                                                                                                                                                                                                                                                                                                                                                                                                                                                                                                                                                                                                                                                                                                                                                                                                                                                                                                                                                                                                                                                                                                                                                                                                                                                                                                                                                                                                                                                                                                                                                                                                                                                                                                                                                                                                                                                                                                                                                                                                                                                                                                                                                                                                                                                                                                                                                                                                                                                                                                                                                                                                                                                                                                                                                                                                                                                                                                                                                                                                                                            |     |
|------------|----------------------------------|---------|-------------|----------|----------|----------|----------------------------------------------------------------------------------------------------------------------------------------------------------------------------------------------------------------------------------------------------------------------------------------------------------------------------------------------------------------------------------------------------------------------------------------------------------------------------------------------------------------------------------------------------------------------------------------------------------------------------------------------------------------------------------------------------------------------------------------------------------------------------------------------------------------------------------------------------------------------------------------------------------------------------------------------------------------------------------------------------------------------------------------------------------------------------------------------------------------------------------------------------------------------------------------------------------------------------------------------------------------------------------------------------------------------------------------------------------------------------------------------------------------------------------------------------------------------------------------------------------------------------------------------------------------------------------------------------------------------------------------------------------------------------------------------------------------------------------------------------------------------------------------------------------------------------------------------------------------------------------------------------------------------------------------------------------------------------------------------------------------------------------------------------------------------------------------------------------------------------------------------------------------------------------------------------------------------------------------------------------------------------------------------------------------------------------------------------------------------------------------------------------------------------------------------------------------------------------------------------------------------------------------------------------------------------------------------------------------------------------------------------------------------------------------------------------------------------------------------------------------------------------------------------------------------------------------------------------------------------------------------------------------------------------------------------------------------------------------------------------------------------------------------------------------------------------------------------------------------------------------------------------------------------------------------------------------------------------------------------------------------------------------------------------------------------------------------------------------------------------------------------------------------------------------------------------------------------------------------------------------------------------------------------------------------------------------------------------------------------------------------------------------------------------------------------------------------------------------------------------------------------------------------------------------------------------------------------------------------------------------------------------------------------------------------------------------------------------------------------------------------------------------------------------------------------------------------------------------------------------------------------------------------------------------------------------------------------------------------------------------------------|-----|
| GO:0044763 | single-organism cellular process | 715/901 | 11314/17046 | 8.64E-19 | 1.29E-15 | 1.01E-15 | <p>AKT3/ABI1/CDH3/TANK/GNE/CDH9/TSPAN5/CDH12/CDH13/FARP1/KLRG1/RCAN2/KCNMB2/CDKN1C/SPEG/BCKDK/TCIRG1/MRV11/TRDN/ABCA9/SPON2/C1D/ZBTB18/TACC2/MT HFS/PDPN/CELF1/TBR1/SEPT9/GJB6/HCS1/NPFFR2/ADCY3/TMED10/SLC27A2/LECT1/RER1/ESM1/HIBADH/CHGA/CHI3L1/ERLIN2/PKP3/EGLN2/B4GALT7/PTH2/KIF12/ACOT7/PDA P1/EXOC3/CHRNA1/CHRNA2/CHRNA5/CARD16/GPRIN1/SORCS1/CIDEA/PANX3/GALNT15/AP3S1/CLCA1/CLN5/ANKRD9/MRPL52/FRMD6/CCR1/SLC51B/C15orf27/SLC38A10/SEZ6 /TNFAIP8L1/CNP/APOA1BP/NEU4/COL9A3/COL11A1/COMP/SCLT1/MAP3K8/ZFP42/ADM/IL13RA/EGFLAM/HUS1B/OR2A14/CPS1/NDUF66/PXDNL/CRABP1/TRPM6/MIB2/PARP4 /MPP7/FAM101A/B3GLCT/MGAT5B/APCDD1/CSTA/KLC3/CTGF/ABCC13/SMYD1/SGOL1/PPM1L/SH3D19/CYB561/CYLD/MBOAT1/ADRB3/ESCO2/CYP11A1/FITM1/ADAL/TRPV3/D DB1/WBP2NL/DDOST/RNF168/ZNF366/BHLHA15/COCH/NLRP6/DLG2/DMBT1/DNAH6/DNAH8/DNMT3A/ABAT/DPH1/DRD4/DSG3/DTNA/AGXT/EEF2/EFNA2/EGFR/EGR3/EIF4G1/ A2M/ELK4/TMEM17/EML1/UNC13D/DNAH12/SLC10A4/ENO2/EPHA1/EPHA3/EPHB4/ESR1/ALAS1/FAH/FAT2/SPATA13/FCGR2A/PHACTR1/FGA/FGF10/FHIT/XRN2/RASA3/PPM1E/ VASH1/BTBD3/SBNO2/TRAK1/MRBR2/ACIN1/LIMCH1/FOXL1/FOXC2/FOXO1/EXPH5/AKR1B1/SPG20/NFASC/EPB41L3/FLNB/DIP2A/FLOT2/RHOBTB2/NUP210/ATP11A/NEDD4L/SY NE1/PSD3/LARP1/PPP1R13B/PUM2/ARHGFE18/RYPB/MORC3/MAPK8IP2/TSSK2/MTOR/SLC37A4/GABBR1/RASGEF1C/RNF144B/ST6GALNAC3/GAK/SAMM50/DFNB31/ALS2CL/PN KD/TENM4/ACOT11/RGS22/STEAP2/GAS2/FBXO2/LCE2B/GATM/GBGT1/GAPDHS/PLEK2/SLC17A5/ADGRF1/RPS6KC1/PABPC1/GJA3/FGF22/NPTN/GJB2/CLUL1/AMPD2/SDCBP2/P DE7B/DKK3/CYTH4/GLS2/VPS4A/AMPD3/GPR162/BMP10/GNAS/PIGW/IZUMO1/THEM5/GPR26/GPER1/EOGT/FFAR2/GRB10/MRPS18B/FLVCR1/GRIK4/DNAJC15/SCG3/GSTP1/TM OD4/GUCY1A3/NME7/GPR132/PADI1/GZMA/ANXA2/HAS1/SOX8/KCNIP2/NRG1/ANXA6/HK1/HLA-B/HLA-DOA/HLA-DPA1/ANXA13/HLA-E/HLA- F/HLX/HMGA1/NR4A1/ACACB/HPCA/APBA2/HOXB3/HOXB3/HRH1/ACADL/HSPA1L/HSP90AA1/HSP90AB1/HTR3A/HTR5A/ID3/ZC3H12D/COL28A1/RSPO2/FMN1/BARHL2/NME9/I GF1/IGF2/CYR61/GPR142/LCE1C/LCE1D/LCE2D/IL1R1/IL1RN/IL6/IL10RA/AQP2/IL11RA/IL12RB2/IL15RA/IL16/FOXK2/AQP5/INHBA/INPP5A/IRF1/AQP9/ISL1/ITGA7/ITGB2/ITGB7/IV L/JUP/CD82/USP50/HILS1/ATP9B/KCNH2/KCNJ8/KCNJ9/KCNMB1/KDR/ACAT1/KIF25/KRT15/AMIGO3/INSC/HESS/SLC6A17/LAMA3/STMN1/OR2A5/LCK/LCP1/MUC21/LDLR/ARHG DIA/LGALS9/LHCGR/LLGL1/LMNA/RAB19/LOX/LTB/LTBP1/SMAD3/MC2R/MCC/ME1/ME2/MEF2D/MAP3K1/MEOX1/MEOX2/MFI2/MFNG/MGAT1/SCGB2A1/MIIT/LHX8/ASGR1/M OV10/MP2/PLEKHG7/NUDT1/MYH4/MYL2/NUBP1/NDUFB4/NEDD9/NEU1/ATP1A2/NFATC3/NHLH2/NMBR/NOV/NPPC/NRAS/NTF3/OAS2/OPRL1/OR2C1/OR3A2/SLC22A18/P2RY 6/PFAFH2/ATP5B/IL21R/ANO7/PALM/ARHGFE3/PARK2/SPOCK3/UTP11L/LEF1/DDX47/CEND1/PRR16/CHST15/ANGPT4/PDE4C/PCYOX1/PDE7A/SIRT6/PDE6B/ATP8A2/GALNT7/PG AM2/PIGC/PIK3CG/PITX2/PKHD1/PKM/PLA2G2A/PLAGL1/SPA17/PLEC/PRKAG3/PML/FXYD6/GPR84/IL20RB/SLCO1C1/PNLIP/TLR9/TREM1/CYTL1/POMC/SSH1/PON1/RIN2/MOV10 L1/ZDHH13/APBB1IP/ROBO4/MXRA8/FBLIM1/PALMD/CYP2W1/LPCAT2/BANP/PPP1CB/HERC6/PPP1CC/PIWIL2/ELP3/ARHGFE10L/PRMT6/GOLPH3L/PPP2R2B/FANCI/MOB1A/SL C47A1/SLC29A3/MIS18BP1/WDR33/TRPV6/SMPD3/SLC30A10/CNOT11/CHRNA9/SYBU/PEX26/LIMS2/FRMD4A/VAC14/PARVA/PRKAR1B/TTC17/IFT122/MCTP2/LMBRD1/CSGALN ACT1/PAG1/CISD1/PRKD1/WSB2/BIN3/APOBR/MAPK3/MAP2K2/PRKRIR/PROC/MRAP/TRPV5/PRMT8/HTRA1/SLAMF8/CDC42SE1/PSMB4/PAK6/RGMA/TRPC7/LPAR5/PSMD7/SLU RP1/ACTR3B/PTGFR/PLEKHG5/TENM2/ERMN/RDH14/MARK4/CCAR2/PTPRE/PXN/FAM60A/ACTA2/RASGRF2/RFC2/TRIM27/RGR/RGS12/RIT2/EXOC4/RPA3/RPL8/RPL29/S100A4/S 100A6/BGLAP/SCT/CCL11/CCL17/MRPS14/PARVG/NOD2/STRA6/SFRP2/CXCR5/ARHGAP9/DNAI2/SGK1/MICAL1/CERK/TMEM237/VPS33A/BMP4/SLC4A1/SLC6A12/SLC8A1/SLC9A 3/SLC20A2/BMPR1B/SLIT1/BOK/SOX9/BPI/SRP68/STAT2/STK3/STK10/SUPT6H/BST2/VAMP2/TAFA6/TBP/TCEA1/ZEB1/ACTC1/TEAD3/TERF1/TGM2/TCHH/TLE3/TLR5/TRAPP10/T NFAIP3/TNFRSF1A/TNXB/TRAF1/TRAFA5/TRPC4/TRPC6/TRPM2/PHLDA2/TWIST1/CCR2/TNFRSF4/UCP1/UPP1/VARS/WNT10B/YWHAG/ZAP70/CA7/CACNA1E/PTP4A1/CACNB2/MO GS/PAX8/CXCR4/FZD5/RAB7A/CARD14/PPDPF/BCL2L14/LST1/CERS4/TMEM204/NLRX1/CSPP1/EPHX3/CALD1/FAM188A/GPR157/ZC3H12A/RAB11FIP1/FAAP100/CPEB4/C6orf25/ COL18A1/EEP1/CLPTM1L/CALR/COL21A1/UNC93B1/QTRT1/SLIRP/CAPS/COLQ/CAST/CAPZB/SH3BGR3/SCRT1/HIST1H3A/DYNLRB2/SLC25A18/SPATA16/ANTXR1/SLA2/MFSD7/C MAHP/BFSP2/ATP13A4/NR0B2/MON1A/CASQ1/HOPX/PARD6G/PARD6B/TTBK1/IL1F10/TRIM63/KDM2B/LOXL3/MGARP/CBX2/RAE1/SLC43A1/IFITM1/GAS7/SCIN/CDK10/KMO/R</p> | 715 |
|------------|----------------------------------|---------|-------------|----------|----------|----------|----------------------------------------------------------------------------------------------------------------------------------------------------------------------------------------------------------------------------------------------------------------------------------------------------------------------------------------------------------------------------------------------------------------------------------------------------------------------------------------------------------------------------------------------------------------------------------------------------------------------------------------------------------------------------------------------------------------------------------------------------------------------------------------------------------------------------------------------------------------------------------------------------------------------------------------------------------------------------------------------------------------------------------------------------------------------------------------------------------------------------------------------------------------------------------------------------------------------------------------------------------------------------------------------------------------------------------------------------------------------------------------------------------------------------------------------------------------------------------------------------------------------------------------------------------------------------------------------------------------------------------------------------------------------------------------------------------------------------------------------------------------------------------------------------------------------------------------------------------------------------------------------------------------------------------------------------------------------------------------------------------------------------------------------------------------------------------------------------------------------------------------------------------------------------------------------------------------------------------------------------------------------------------------------------------------------------------------------------------------------------------------------------------------------------------------------------------------------------------------------------------------------------------------------------------------------------------------------------------------------------------------------------------------------------------------------------------------------------------------------------------------------------------------------------------------------------------------------------------------------------------------------------------------------------------------------------------------------------------------------------------------------------------------------------------------------------------------------------------------------------------------------------------------------------------------------------------------------------------------------------------------------------------------------------------------------------------------------------------------------------------------------------------------------------------------------------------------------------------------------------------------------------------------------------------------------------------------------------------------------------------------------------------------------------------------------------------------------------------------------------------------------------------------------------------------------------------------------------------------------------------------------------------------------------------------------------------------------------------------------------------------------------------------------------------------------------------------------------------------------------------------------------------------------------------------------------------------------------------------------------------------------------|-----|

|            |                       |         |             |          |          |          |                                                                                                                                                                                                                                                                                                                                                                                                                                                                                                                                                                                                                                                                                                                                                                                                                                                                                                                                                                                                                                                                                                                                                                                                                                                                                                                                                                                                                                                                                                                                                                                                                                                                                                                                                                                                                                                                                                                                                                                                                                                                                                                                                                                                                                                                                                                                                                                                                                                                                                                                                                                                                                                                                                                                                                                                                                                                                                                                                                                                                                                                                                                                                                                                                                                                                                                                                                                                                                                                                                                                                                                                                                                                                                                                                                                                                                                                                                                                                                                                                                                                                                                                                                        |     |
|------------|-----------------------|---------|-------------|----------|----------|----------|------------------------------------------------------------------------------------------------------------------------------------------------------------------------------------------------------------------------------------------------------------------------------------------------------------------------------------------------------------------------------------------------------------------------------------------------------------------------------------------------------------------------------------------------------------------------------------------------------------------------------------------------------------------------------------------------------------------------------------------------------------------------------------------------------------------------------------------------------------------------------------------------------------------------------------------------------------------------------------------------------------------------------------------------------------------------------------------------------------------------------------------------------------------------------------------------------------------------------------------------------------------------------------------------------------------------------------------------------------------------------------------------------------------------------------------------------------------------------------------------------------------------------------------------------------------------------------------------------------------------------------------------------------------------------------------------------------------------------------------------------------------------------------------------------------------------------------------------------------------------------------------------------------------------------------------------------------------------------------------------------------------------------------------------------------------------------------------------------------------------------------------------------------------------------------------------------------------------------------------------------------------------------------------------------------------------------------------------------------------------------------------------------------------------------------------------------------------------------------------------------------------------------------------------------------------------------------------------------------------------------------------------------------------------------------------------------------------------------------------------------------------------------------------------------------------------------------------------------------------------------------------------------------------------------------------------------------------------------------------------------------------------------------------------------------------------------------------------------------------------------------------------------------------------------------------------------------------------------------------------------------------------------------------------------------------------------------------------------------------------------------------------------------------------------------------------------------------------------------------------------------------------------------------------------------------------------------------------------------------------------------------------------------------------------------------------------------------------------------------------------------------------------------------------------------------------------------------------------------------------------------------------------------------------------------------------------------------------------------------------------------------------------------------------------------------------------------------------------------------------------------------------------------------------|-----|
| GO:0065007 | biological regulation | 666/901 | 10343/17046 | 6.62E-18 | 7.89E-15 | 6.21E-15 | <p>AKT3/ABI1/CDH3/TANK/ZNF783/TSPAN5/CDH13/MBNL2/FARP1/KLRG1/RCAN2/KCNMB2/CDKN1C/SPEG/TCIRG1/MRVI1/TRDN/SPON2/C1D/ZBTB18/PITRM1/TACC2/PDPN/DMRT2/CELF1/CELF2/TBR1/GJB6/HGST/NPFFR2/ADCY3/PNRC1/TMED10/LECT1/RER1/ESM1/HNRNPUL1/CHGA/CHI3L1/ERLIN2/PSIP1/EGLN2/ATXN2L/B4GALT7/PTH2/PDAP1/CHRNA1/CHRNA2/CHRNA5/CARD16/SORCS1/ZBED9/CIDEA/AP3S1/CLN5/ANKRD9/FRMD6/CCR1/SLC51B/C15orf27/ZG16B/SEZ6/TNFAIP8L1/CNP/COMP/MAP3K8/ZFP42/ADM/IL131A/EGFLAM/HUS1B/OR2A14/CP51/CRABP1/ZNF358/MIB2/MPP7/LDLRAD3/FAM101A/APCDD1/CSTA/ZNF738/CTGF/SMYD1/SGOL1/PPM1L/SH3D19/CYLD/ADRB3/ESCO2/CYP11A1/ZNF782/FITM1/TRPV3/ZNF709/ZNF781/CITED4/DOB1/RNF168/ZNF366/BHLHA15/COCH/NLRP6/DIO3/DLG2/DMBT1/DNMT3A/ABAT/DRD4/DTNA/ECE1/AGXT/EEF2/EFNA2/EGFR/EGR3/PATL2/EIF4G1/A2M/ELK4/TMEM17/UNC13D/EPHA1/EPHA3/EPHB4/ESR1/F11/SPATA13/FCGR2A/PHACTR1/SP8/FGA/FGF10/FHIT/XRN2/RASA3/PPM1E/VASH1/SBNO2/TRAK1/MSRB2/ACIN1/FOXL1/FOXC2/TBC1D9B/FOXO1/EXPH5/AKR1B1/SPG20/EPB41L3/GGA3/FLNB/DIP2A/FLOT2/MLC1/TBC1D1/RHOBTB2/NUP210/ATP11A/NEDD4L/SYNE1/PSD3/LARP1/PPP1R13B/PUM2/ARHGEF18/RYPB/MORC3/MAPK8IP2/TSSK2/VGLL2/MTOR/SLC37A4/GABBR1/RASGEF1C/RNF144B/ZNF549/DFNB31/ALS2CL/PNKD/TENM4/ACOT11/RGS22/STEAP2/GAS2/FBXL21/FBXO2/SACS/GAPDHS/PLEK2/ADGRF1/RPS6KC1/PABPC1/DNAJC2/FGF22/NPTN/AMPD2/SDCBP2/PDE7B/DKK3/CYTH4/GLS2/VPS4A/AMPD3/GPR162/BMP10/ZNF638/GNAS/ZNF311/CRACR2B/ZNF844/GPR26/GPER1/DOK7/FFAR2/GRB10/FLVCR1/GRIK4/ZBTB44/DNAJC15/SCG3/GSTP1/GTF2B/BRF1/TMOD4/GUCY1A3/NME7/GPR132/GZMA/ANXA2/HAS1/SERPIND1/SOX8/KCNIP2/NRG1/ANXA6/HK1/HLA-B/HLA-DOA/HLA-DPA1/ANXA13/HLA-E/HLA-F/HLX/HMGA1/NR4A1/ACACB/HPCA/APBA2/HOXB3/HOXC4/HOXC5/HOXC6/HOXC7/AGFG2/HRH1/ACADL/HSPA1L/HSP90AA1/HSP90AB1/HTR3A/HTR5A/TFAP2E/ID3/ZC3H12D/COL28A1/RSPO2/FMN1/BARHL2/NME9/IGF1/IGF2/CYR61/GPR142/IL1R1/IL1RN/IL6/IL10RA/AQP2/IL11RA/IL12RB2/IL15RA/IL16/FOXK2/AQP5/INHBA/IRF1/AQP9/ISL1/ITGA7/ITGB2/ITGB7/ITIH3/ITIH4/JUP/CD82/USP50/HILS1/ATP9B/KCNH2/KCNJ8/KCNJ9/KCNMB1/KDR/KIF25/IPO5/AMIGO3/HES5/AFF3/LAMA3/STMN1/OR2A5/LCK/LCP1/LDLR/ARHGDI2/LGALS9/LHCGR/LLGL1/LMNA/LMO2/RAB19/LTB/LTBP1/SMAD3/MC2R/MCC/ME1/ME2/MEF2D/MAP3K1/MEOX1/MEOX2/MFI2/MFNG/SCGB2A1/MITF/LHX8/MOV10/MP2/PLEKHG7/MT1A/MYL2/NUBP1/NEDD9/NEU1/ATP1A2/NFATC3/NFYB/NHLH2/NMBR/NOV/NPPC/NRAS/NTF3/OAS2/OPRL1/OR2C1/OR3A2/P2RY6/PAFAH2/ATP5B/IL21R/ANO7/PALM/ARHGEF3/PARK2/SPOCK3/UTP11L/LEF1/DDX47/CEND1/PRR16/ANGPT4/PDE4C/PDE7A/C11orf73/SIRT6/PDE6B/ATP8A2/PDGFRA/PI3/PIK3CG/PITX2/PKHD1/PLA2G2A/PLAGL1/PRKAG3/PML/RIPPLY3/FXYD6/GPR84/IL20RB/PNLIP/RIPK4/TLR9/TREM1/CYTL1/POMC/SSH1/PON1/RIN2/POU2AF1/ZDHHC13/APBB1IP/ROBO4/FBLIM1/BNC2/MED18/PALMD/BANP/PPP1CB/PPP1CC/PIWIL2/ELP3/ARHGEF10L/PRMT6/DNAJC17/GOLPH3L/ZNF532/PPP2R2B/FANCI/MOB1A/TRPV6/SMPD3/SLC30A10/CNOT11/CHRNA9/SYBU/LIMS2/VAC14/PARVA/PRKAR1B/IFT122/MCTP2/LMBRD1/PAG1/CISD1/PRKD1/WSB2/MYNN/BIN3/MAPK3/MAP2K2/PRKRIR/PROC/MRAP/PRMT8/MASP1/HTRA1/SLAMF8/CDC42SE1/PSMB4/PAK6/ARNTL2/RGMA/PRDM11/TRPC7/LPAR5/PSMD7/SLURP1/ACTR3B/PTGFR/PLEKHG5/TENM2/GATAD2B/ERMN/RDH14/METT14/MARK4/CCAR2/PTPRE/PXN/CREBZF/FAM60A/ACTA2/RASGRF2/RFC2/TRIM27/RGR/RGS12/RIT2/RPA3/S100A4/S100A6/BGLAP/SCT/CCL11/CCL17/ABHD4/NPAS3/NOD2/STRA6/SFRP2/CXCR5/ARHGAP9/TRA2B/GZF1/SGK1/MICAL1/TMEM237/VPS33A/BMP4/SLC4A1/ZNF649/SLC6A12/SLC8A1/SLC9A3/BMPR1B/SLIT1/BRD9/ZSCAN18/BOK/SOX9/BPI/STAT2/STK3/STK10/SUPT6H/BST2/VAMP2/TAF4B/TBP/TCEA1/TCEB2/ZEB1/ACTC1/TEAD3/TERF1/TGM2/TIMP3/TLE3/TLR5/TNFAIP3/TNFRSF1A/TNXB/TRA1/TRA5/TRPC4/TRPC6/PHLDA2/TWIST1/CCR2/TNFRSF4/UCP1/VARS/WNT10B/YWHAG/ZA P70/ZNF7/CA7/ZNF124/ZNF177/CACNA1E/PTP4A1/CACNB2/PAX8/CXCR4/FZD5/RAB7A/CARD14/BCL2L14/LST1/TMEM204/NLRX1/ZNF665/CSPP1/ZC3H14/GPR157/ZNF606/ZC3H12A/RAB11FIP1/CPEB4/C6orf25/COL18A1/ZNF436/CALR/UNC93B1/SLIRP/CAPS/COLQ/CAST/CAPZB/SH3BGRL3/SCRT1/HIST1H3A/ANTXR1/SLA2/CMAMP/ATP13A4/ZNF397/NROB2/CASQ1/HOPX/PARD6B/TTBK1/IL1F10/SPINK7/TRIM63/KDM2B/LOXL3/MGARP/CBX2/RAE1/IFITM1/GAS7/SCIN/CDK10/RUNX1/TP63/RUNX3/SERPINA6/IRS2/ACTN1/CRADD/FADD/TNFRSF11A/ALDH1A2/SPHK1/BUD31/CCNA1/SKAP2/LIMD1/TSPAN18/CCRL2/ERI1/PRC1/STARD13/PIAS2/ZFAND2A/MAP3K6/SYTT7/LDB2/ESAM/SLC16A3/CBFA2T2/RSAD2/SMDT1/AURKB/DAPL1/CD8A/REEP6/TRIP10/ADIPOQ/ARHGAP29/LY86/RAB3D/H2AFY/SMAD5-</p> | 666 |
|------------|-----------------------|---------|-------------|----------|----------|----------|------------------------------------------------------------------------------------------------------------------------------------------------------------------------------------------------------------------------------------------------------------------------------------------------------------------------------------------------------------------------------------------------------------------------------------------------------------------------------------------------------------------------------------------------------------------------------------------------------------------------------------------------------------------------------------------------------------------------------------------------------------------------------------------------------------------------------------------------------------------------------------------------------------------------------------------------------------------------------------------------------------------------------------------------------------------------------------------------------------------------------------------------------------------------------------------------------------------------------------------------------------------------------------------------------------------------------------------------------------------------------------------------------------------------------------------------------------------------------------------------------------------------------------------------------------------------------------------------------------------------------------------------------------------------------------------------------------------------------------------------------------------------------------------------------------------------------------------------------------------------------------------------------------------------------------------------------------------------------------------------------------------------------------------------------------------------------------------------------------------------------------------------------------------------------------------------------------------------------------------------------------------------------------------------------------------------------------------------------------------------------------------------------------------------------------------------------------------------------------------------------------------------------------------------------------------------------------------------------------------------------------------------------------------------------------------------------------------------------------------------------------------------------------------------------------------------------------------------------------------------------------------------------------------------------------------------------------------------------------------------------------------------------------------------------------------------------------------------------------------------------------------------------------------------------------------------------------------------------------------------------------------------------------------------------------------------------------------------------------------------------------------------------------------------------------------------------------------------------------------------------------------------------------------------------------------------------------------------------------------------------------------------------------------------------------------------------------------------------------------------------------------------------------------------------------------------------------------------------------------------------------------------------------------------------------------------------------------------------------------------------------------------------------------------------------------------------------------------------------------------------------------------------------------------|-----|

|            |                                  |         |            |          |          |          |                                                                                                                                                                                                                                                                                                                                                                                                                                                                                                                                                                                                                                                                                                                                                                                                                                                                                                                                                                                                                                                                                                                                                                                                                                                                                                                                                                                                                                                                                                                                                                                                                                                                                                                                                                                                                                                                                                                                                                                                                                                                                                                                                                                                                                                                                                                                                                                                                                                                                                                                                                                                                                                                                                                                                                                                                                                                                                                                                                                                                                                                                                                                                                                                                                                                                                                                                                                                                                                                                                                                                                                                                                                                                                                                                                                                                                                                                                                                                                                                                                                                                                                   |     |
|------------|----------------------------------|---------|------------|----------|----------|----------|-------------------------------------------------------------------------------------------------------------------------------------------------------------------------------------------------------------------------------------------------------------------------------------------------------------------------------------------------------------------------------------------------------------------------------------------------------------------------------------------------------------------------------------------------------------------------------------------------------------------------------------------------------------------------------------------------------------------------------------------------------------------------------------------------------------------------------------------------------------------------------------------------------------------------------------------------------------------------------------------------------------------------------------------------------------------------------------------------------------------------------------------------------------------------------------------------------------------------------------------------------------------------------------------------------------------------------------------------------------------------------------------------------------------------------------------------------------------------------------------------------------------------------------------------------------------------------------------------------------------------------------------------------------------------------------------------------------------------------------------------------------------------------------------------------------------------------------------------------------------------------------------------------------------------------------------------------------------------------------------------------------------------------------------------------------------------------------------------------------------------------------------------------------------------------------------------------------------------------------------------------------------------------------------------------------------------------------------------------------------------------------------------------------------------------------------------------------------------------------------------------------------------------------------------------------------------------------------------------------------------------------------------------------------------------------------------------------------------------------------------------------------------------------------------------------------------------------------------------------------------------------------------------------------------------------------------------------------------------------------------------------------------------------------------------------------------------------------------------------------------------------------------------------------------------------------------------------------------------------------------------------------------------------------------------------------------------------------------------------------------------------------------------------------------------------------------------------------------------------------------------------------------------------------------------------------------------------------------------------------------------------------------------------------------------------------------------------------------------------------------------------------------------------------------------------------------------------------------------------------------------------------------------------------------------------------------------------------------------------------------------------------------------------------------------------------------------------------------------------------|-----|
| GO:0050789 | regulation of biological process | 636/901 | 9837/17046 | 1.71E-16 | 1.70E-13 | 1.33E-13 | <p>AKT3/ABI1/CDH3/TANK/ZNF783/TSPAN5/CDH13/MBNL2/FARP1/KLRG1/RCAN2/KCNMB2/CDKN1C/SPEG/TCIRG1/MRVI1/TRDN/SPON2/C1D/ZBTB18/PITRM1/TACC2/PDPN/DMRT2/CELF1/CELF2/TBR1/GJB6/HCS1/NPFFR2/ADCY3/PNRC1/TMED10/LECT1/RER1/ESM1/HNRNPUL1/CHGA/CHI3L1/ERLIN2/PSIP1/EGLN2/ATXN2L/B4GALT7/PTH2/PDAP1/CHRNA1/CHRNA2/CHRNA5/CARD16/SORCS1/ZBED9/CIDEA/AP3S1/ANKRD9/FRMD6/CCR1/SLC51B/SEZ6/TNFAIP8L1/COMP/MAP3K8/ZFP42/ADM/IL131RA/EGFLAM/HUS1B/OR2A14/CPS1/C RABP1/ZNF358/MI2/MPP7/LDLRAD3/FAM101A/APCDD1/CSTA/ZNF738/CTGF/SMYD1/SGOL1/PPM1L/SH3D19/CYLD/ADRB3/ESCO2/ZNF782/FITM1/TRPV3/ZNF709/ZNF781/CITE D4/DBD1/RNF168/ZNF366/BHLHA15/COCH/NLRP6/DIO3/DLG2/DMBT1/DNMT3A/ABAT/DRD4/DTNA/ECE1/AGXT/EEF2/EFNA2/EGFR/EGR3/PATL2/EIF4G1/A2M/ELK4/TMEM17/U NC13D/EPHA1/EPHA3/EPHB4/ESR1/F11/SPATA13/FCGR2A/PHACTR1/SP8/FGA/FGF10/FHIT/XRN2/RASA3/PPM1E/VASH1/SBNO2/TRAK1/MRSB2/ACIN1/FOXL1/FOXC2/TBC1D9B/F OXO1/EXPH5/AKR1B1/SPG20/EPB41L3/GGA3/FLNB/DIP2A/FLOT2/MLC1/TBC1D1/RHOBTB2/NUP210/NEDD4L/PSD3/LARP1/PPP1R13B/PUM2/ARHGFE18/RYBP/MORC3/MAPK8IP 2/TSSK2/VGLL2/MTOR/SLC37A4/GABBR1/RASGEF1C/RNF144B/ZNF549/ALS2CL/PNKD/TENM4/ACOT11/RGS22/GAS2/FBXL21/FBXO2/SACS/GAPDHS/PLEK2/ADGRF1/RPS6KC1/PA BPC1/DNAJC2/FGF22/NPTN/SDCBP2/PDE7B/DKK3/CYTH4/GLS2/VPS4A/GPR162/BMP10/ZNF638/GNAS/ZNF311/CRACR2B/ZNF844/GPR26/GPER1/DOK7/FFAR2/GRB10/FLVCR1/G RIK4/ZBTB44/DNAJC15/GSTP1/GTF2B/BRF1/TMOD4/GUCY1A3/NME7/GPR132/GZMA/ANXA2/HAS1/SERPIND1/SOX8/KCNIP2/NRG1/ANXA6/HK1/HLA-B/HLA-DOA/HLA-DPA1/ANXA13/HLA-E/HLA-F/HLX/HMGA1/NR4A1/ACACB/HPCA/APBA2/HOXB3/HOXC4/HOXC5/HOXC6/HOXD3/AGFG2/HRH1/ACADL/HSPA1L/HSP90AA1/HSP90AB1/HTR3A/HTR5A/TFAP2E/ID3/ZC3H12D/C OL28A1/RSPO2/FMN1/BARHL2/NME9/IGF1/IGF2/CYR61/GPR142/IL1R1/IL1RN/IL6/IL10RA/IL11RA/IL12RB2/IL15RA/IL16/FOXK2/INHBA/IRF1/ISL1/ITGA7/ITGB2/ITGB7/ITIH3/ITIH4 /JUP/CD82/USP50/HLS1/KCNH2/KCNJ8/KCNJ9/KDR/KIF25/IPO5/AMIGO3/HES5/AFF3/LAMA3/STMN1/OR2A5/LCK/LCP1/LDLR/ARHGDI1/LGALS9/LHCGR/LLGL1/LMNA/LMO2/RAB 19/LTB/LTBP1/SMAD3/MC2R/MCC/ME1/ME2/MEF2D/MAP3K1/MEOX1/MEOX2/MFI2/MFNG/SCGB2A1/MITF/LHX8/MOV10/MPZ/PLEKHG7/MT1A/MYL2/NUBP1/NEDD9/NEU1/A TP1A2/NFATC3/NFYB/NHLH2/NMBR/NOV/NPPC/NRAS/NTF3/OAS2/OPRL1/OR2C1/OR3A2/P2RY6/PAFAH2/ATP5B/IL21R/PALM/ARHGFE3/PARK2/SPOCK3/UTP11L/LEF1/DDX47/C END1/PRR16/ANGPT4/PDE4C/PDE7A/C11orf73/SIRT6/PDE6B/ATP8A2/PGAM2/PI3/PIK3CG/PTX2/PKH1/PLA2G2A/PLAGL1/PRKAG3/PML/RIPPLY3/FXYD6/GPR84/IL20RB/PNLIP/ RIPK4/TLR9/TREM1/CYTL1/POMC/SSH1/PON1/RIN2/POU2AF1/ZDHHC13/APBB1P/ROBO4/FBLIM1/BNC2/MED18/PALMD/BANP/PPP1CB/PPP1CC/PIWIL2/ELP3/ARHGFE10L/PRM T6/DNAJC17/GOLPH3L/ZNF532/PPP2R2B/FANCI/MOB1A/TRPV6/SMPD3/SLC30A10/CNOT11/CHRNA9/SYBU/LIMS2/VAC14/PARVA/PRKAR1B/IFT122/MCTP2/LMBRD1/PAG1/CISD 1/PRKD1/WBS2/MYNN/BIN3/MAPK3/MAP2K2/PRKRIR/PROC/MRAP/PRMT8/MASP1/HTRA1/SLAMF8/CDC42SE1/PSMB4/PAK6/ARNTL2/RGMA/PRDM11/LPAR5/PSMD7/SLURP1/A CTR3B/PTGFR/PLEKHG5/TENM2/GATAD2B/ERMN/METT14/MARK4/CCAR2/PTPRE/PXN/CREBZF/FAM60A/ACTA2/RASGRF2/TRIM27/RGR/RGS12/RIT2/RPA3/S100A4/S100A6/BGL AP/SCT/CCL11/CCL17/NPAS3/NOD2/STRA6/SFRP2/CXCR5/ARHGAP9/TRA2B/GZF1/SGK1/MICAL1/TMEM237/VPS33A/BMP4/ZNF649/SLC8A1/SLC9A3/BMPR1B/SLIT1/BRD9/ZSCAN 18/BOK/SOX9/BPI/STAT2/STK3/STK10/SUPT6H/BST2/VAMP2/TAF4B/TBP/TCEA1/TCEB2/ZEB1/ACTC1/TEAD3/TERF1/TGM2/TIMP3/TLE3/TLR5/TNFAIP3/TNFRSF1A/TNXP/TRA1/T RAF5/TRPC6/PHLDA2/TWIST1/CCR2/TNFRSF4/UCP1/VARS/WNT10B/YWHAG/ZAP70/ZNF7/CA7/ZNF124/ZNF177/CACNA1E/PTP4A1/CACNB2/PAX8/CXCR4/FZD5/RAB7A/CARD14/ BCL2L14/LST1/TMEM204/NLRX1/ZNF665/CSPP1/ZC3H14/GPR157/ZNF606/ZC3H12A/RAB11FIP1/CEPE4/C6orf25/COL18A1/ZNF436/CALR/UNC93B1/SLIRP/CAPS/COLQ/CAST/CAPZ B/SH3BGL3/SCRT1/HIST1H3A/ANTXR1/SLA2/CMAHP/ZNF397/NR0B2/CASQ1/HOPX/PARD6B/TTBK1/IL1F10/SPINK7/TRIM63/KDM2B/LOXL3/MGARP/CBX2/RAE1/IFITM1/GAS7/S CIN/CDK10/RUNX1/TP63/RUNX3/SERPINA6/IRS2/ACTN1/CRADD/FADD/TNFRSF11A/ALDH1A2/SPHK1/BUD31/CCNA1/SKAP2/LIMD1/TSPAN18/CCRL2/ERI1/PRC1/STARD13/PIAS2/ ZFAND2A/MAP3K6/SYT7/LDB2/CBFA2T2/RSAD2/AURKB/DAPL1/CD8A/REEP6/TRIP10/ADIPOQ/ARHGAP29/LY86/RAB3D/H2AFY/SMAD5- AS1/RAB36/ARHGFE10/MICAL2/N4BP1/VGLL4/NUP93/RAPGEF2/ULK2/USP6NL/CD79A/ZBTB39/TELO2/RABGAP1L/IQSEC1/FGF19/NR1H4</p> | 636 |
|------------|----------------------------------|---------|------------|----------|----------|----------|-------------------------------------------------------------------------------------------------------------------------------------------------------------------------------------------------------------------------------------------------------------------------------------------------------------------------------------------------------------------------------------------------------------------------------------------------------------------------------------------------------------------------------------------------------------------------------------------------------------------------------------------------------------------------------------------------------------------------------------------------------------------------------------------------------------------------------------------------------------------------------------------------------------------------------------------------------------------------------------------------------------------------------------------------------------------------------------------------------------------------------------------------------------------------------------------------------------------------------------------------------------------------------------------------------------------------------------------------------------------------------------------------------------------------------------------------------------------------------------------------------------------------------------------------------------------------------------------------------------------------------------------------------------------------------------------------------------------------------------------------------------------------------------------------------------------------------------------------------------------------------------------------------------------------------------------------------------------------------------------------------------------------------------------------------------------------------------------------------------------------------------------------------------------------------------------------------------------------------------------------------------------------------------------------------------------------------------------------------------------------------------------------------------------------------------------------------------------------------------------------------------------------------------------------------------------------------------------------------------------------------------------------------------------------------------------------------------------------------------------------------------------------------------------------------------------------------------------------------------------------------------------------------------------------------------------------------------------------------------------------------------------------------------------------------------------------------------------------------------------------------------------------------------------------------------------------------------------------------------------------------------------------------------------------------------------------------------------------------------------------------------------------------------------------------------------------------------------------------------------------------------------------------------------------------------------------------------------------------------------------------------------------------------------------------------------------------------------------------------------------------------------------------------------------------------------------------------------------------------------------------------------------------------------------------------------------------------------------------------------------------------------------------------------------------------------------------------------------------------------|-----|



|            |                                       |         |            |          |          |          |                                                                                                                                                                                                                                                                                                                                                                                                                                                                                                                                                                                                                                                                                                                                                                                                                                                                                                                                                                                                                                                                                                                                                                                                                                                                                                                                                                                                                                                                                                                                                                                                                                                                                                                                                                                                                                                                                                                                                                                                                                                                                                                                                                                                                                                                                                                                                                                                                                                                                                                                                                                                                                                                                                                                                                                                                                                                                                                                                                                                                                                                                                                                                                                                                                                                                                                                                                                                                                                                                                                                                                                                                                                                                                                                                                                                                                                                                                                 |     |
|------------|---------------------------------------|---------|------------|----------|----------|----------|-----------------------------------------------------------------------------------------------------------------------------------------------------------------------------------------------------------------------------------------------------------------------------------------------------------------------------------------------------------------------------------------------------------------------------------------------------------------------------------------------------------------------------------------------------------------------------------------------------------------------------------------------------------------------------------------------------------------------------------------------------------------------------------------------------------------------------------------------------------------------------------------------------------------------------------------------------------------------------------------------------------------------------------------------------------------------------------------------------------------------------------------------------------------------------------------------------------------------------------------------------------------------------------------------------------------------------------------------------------------------------------------------------------------------------------------------------------------------------------------------------------------------------------------------------------------------------------------------------------------------------------------------------------------------------------------------------------------------------------------------------------------------------------------------------------------------------------------------------------------------------------------------------------------------------------------------------------------------------------------------------------------------------------------------------------------------------------------------------------------------------------------------------------------------------------------------------------------------------------------------------------------------------------------------------------------------------------------------------------------------------------------------------------------------------------------------------------------------------------------------------------------------------------------------------------------------------------------------------------------------------------------------------------------------------------------------------------------------------------------------------------------------------------------------------------------------------------------------------------------------------------------------------------------------------------------------------------------------------------------------------------------------------------------------------------------------------------------------------------------------------------------------------------------------------------------------------------------------------------------------------------------------------------------------------------------------------------------------------------------------------------------------------------------------------------------------------------------------------------------------------------------------------------------------------------------------------------------------------------------------------------------------------------------------------------------------------------------------------------------------------------------------------------------------------------------------------------------------------------------------------------------------------------------|-----|
| GO:0050794 | regulation of cellular process        | 610/901 | 9347/17046 | 4.20E-16 | 3.58E-13 | 2.81E-13 | <p>AKT3/ABI1/CDH3/TANK/ZNF783/TSPAN5/CDH13/MBNL2/FARP1/KLRG1/RCAN2/CDKN1C/SPEG/TCIRG1/MRVI1/TRDN/C1D/ZBTB18/TACC2/PDPN/DMRT2/CELF1/TBR1/GJB6/HCST1/NPFFR2/ADCY3/PNRC1/TMED10/LECT1/RER1/ESM1/HNRNPUL1/CHGA/CHI3L1/ERLIN2/PSIP1/EGLN2/ATXN2L/B4GALT7/PTH2/PDAP1/CHRNA1/CHRNA2/CHRNA5/CARD16/SORC51/ZBED9/CIDEA/AP351/ANKRD9/FRMD6/CCR1/SLC51B/SEZ6/TNFAIP8L1/COMP/MAP3K8/ZFP42/ADM/IL31RA/EGFLAM/HUS1B/OR2A14/CRABP1/ZNF358/MIB2/MPP7/FAM101A/APCDD1/CSTA/ZNF738/CTGF/SMYD1/SGOL1/PPM1L/SH3D19/CYLD/ADRB3/ESCO2/ZNF782/TRPV3/ZNF709/ZNF781/CITED4/DDB1/RNF168/ZNF366/BHLHA15/COCH/NLRP6/DLG2/DMBT1/DNMT3A/ABAT/DRD4/DTNA/ECE1/AGXT/EEF2/EFNA2/EGFR/EGR3/PATL2/EIF4G1/A2M/ELK4/TMEM17/UNC13D/EPHA1/EPHA3/EPHB4/ESR1/SPATA13/FCGR2A/SP8/FGA/FGF10/FHIT/XRN2/RASA3/PPM1E/VASH1/SBNO2/TRAK1/MSRB2/ACIN1/FOXL1/FOX2/FOXO1/EXPH5/AKR1B1/SPG20/EPB41L3/FLNB/DIP2A/FLOT2/MCL1/RHOBTB2/NUP210/NEDD4L/PSD3/LARP1/PPP1R13B/PUM2/ARHGEF18/RYPB/MORC3/MAPK8IP2/TSSK2/VGLL2/MTOR/GABBR1/RASGEF1C/RNF144B/ZNF549/ALS2CL/PNKD/TENM4/ACOT11/RGS22/GAS2/FBXO2/SACS/GAPDH/PLEK2/ADGRF1/RPS6KC1/PABPC1/DNAJC2/FGF22/NPTN/SDCBP2/PDE7B/DKK3/CYTH4/GLS2/VPS4A/GPR162/BMP10/ZNF638/GNAS/ZNF311/ZNF844/GPR26/GPER1/DOK7/FFAR2/GRB10/GRIK4/ZBTB44/DNAJC15/GSTP1/GTF2B/BRF1/TMOD4/GUCY1A3/NME7/GPR132/GZMA/ANXA2/HAS1/SERPIND1/SOX8/KCNIP2/NRG1/ANXA6/HK1/HLA-B/HLA-DOA/HLA-DPA1/ANXA13/HLA-E/HLA-F/HLX/HMGA1/NR4A1/ACACB/HPCA/HOXB3/HOXC4/HOXC5/HOXC6/HOXD3/HRH1/ACADL/HSPA1L/HSP90AA1/HSP90AB1/HTR3A/HTR5A/TFAP2E/ID3/ZC3H12D/COL28A1/RSP02/FMN1/BARHL2/NME9/IGF1/IGF2/CYR61/GPR142/IL1R1/IL1RN/IL6/IL10RA/IL11RA/IL12RB/IL15RA/IL16/FOXK2/INHBA/IRF1/ISL1/ITGA7/ITGB2/ITGB7/ITIH3/ITIH4/JUP/CD82/USP50/HILS1/KCNH2/KCNJ8/KCNJ9/KDR/KIF25/IPO5/AMIGO3/HES5/AFF3/LAMA3/STMN1/OR2A5/LCK/LCP1/LDLR/ARHGDI1/LGALS9/LHCGR/LLGL1/LMNA/LMO2/RAB19/LTB/LTBP1/SAMD3/MC2R/MCC/ME1/ME2/MEF2D/MAP3K1/MEOX1/MEOX2/MFI2/MFNG/SCGB2A1/MITF/LHX8/MOV10/MPZ/PLEKHG7/MYL2/NUBP1/NEDD9/NEU1/ATP1A2/NFATC3/NFYB/NHLH2/NMBR/NOV/NPPC/NRAS/NTF3/OAS2/OPRL1/OR2C1/OR3A2/P2RY6/PFAFH2/ATP5B/IL21R/PALM/ARHGFE3/PARK2/SPOCK3/UTP11L/LEF1/DDX47/CEND1/PRR16/ANGPT4/PDE4C/PDE7A/C11orf73/SIRT6/PDE6B/ATP8A2/PGAM2/PI3/PIK3CG/PITX2/PKH1/PLA2G2A/PLAGL1/PRKAG3/PML/RIPPLY3/FXYD6/GPR84/IL20RB/PNLP/RIPK4/TLR9/TREM1/CYT11/POMC/SSH1/RIN2/POU2AF1/ZDHHC13/APBB1P/ROBO4/FBLIM1/BNC2/MED18/PALMD/BANP/PPP1CB/PPP1CC/PIWIL2/ELP3/ARHGEF10L/PRMT6/DNAJC17/GOLPH3L/ZNF532/PPP2R2B/FANCI/MOB1A/TRPV6/SMPD3/SLC30A10/CNOT11/CHRNA9/SYBU/LIMS2/VAC14/PARVA/PRKAR1B/IFT122/MCTP2/LMBRD1/PAG1/CISD1/PRKD1/WSB2/MYNN/BIN3/MAPK3/MAP2K2/PRKRIR/PROC/MRAP/PRMT8/MASP1/HTRA1/SLAMF8/CDC42SE1/PSMB4/PAK6/ARNTL2/RGMA/PRDM11/LPAR5/PSMD7/SLURP1/ACTR3B/PTGFR/PLEKHG5/TENM2/GATAD2B/ERMN/METTL14/MARK4/CCAR2/PTPRE/PXN/CREBZF/FAM60A/RASGRF2/TRIM27/RGR/RGS12/RIT2/RPA3/S100A4/S100A6/BGLAP/SCT/CCL11/CCL17/NPAS3/NOD2/STRA6/SFRP2/CXCR5/ARHGAP9/TRA2B/GZF1/SGK1/MICAL1/TMEM237/BMP4/ZNF649/SLC8A1/BMPR1B/SLIT1/BRD9/ZSCAN18/BOK/SOX9/BPI/STAT2/STK3/STK10/SUPT6H/BST2/VAMP2/TAF4B/TBP/TCEA1/TCEB2/ZEB1/ACTC1/TEAD3/TERF1/TGM2/TIMP3/TLF3/TLR5/TNFAIP3/TNFRSF1A/TNXB/TRA1/TRA5/TRPC6/PHLDA2/TWIST1/CCR2/TNFRSF4/UCP1/VARS/WNT10B/YWHAG/ZAP70/ZNF7/CA7/ZNF124/ZNF177/CACNA1E/PTP4A1/CACNB2/PAX8/CXCR4/FZD5/RAB7A/CARD14/BCL2L14/LST1/TMEM204/NLRX1/ZNF665/CSPP1/ZC3H14/GPR157/ZNF606/ZC3H12A/RAB11FIP1/CPEB4/C6orf25/COL18A1/ZNF436/CALR/UNC93B1/SILRP/CAPS/COLQ/CAST/CAPZB/SH3BGL3/SCR11/HST1/H3A/ANTXR1/SLA2/CAHHP/ZNF397/NROB2/CASQ1/HOPX/PARD6B/TTBK1/IL1F10/SPINK7/TRIM63/KDM2B/LOXL3/MGAR/PCB2/RAE1/IFITM1/GAS7/SCIN/CDK10/RUNX1/TP63/RUNX3/SERPINA6/IRS2/ACTN1/CRADD/FADD/TNFRSF11A/ALDH1A2/SPHK1/BUD31/CCNA1/SKAP2/LIMD1/TSPAN18/CCRL2/PRC1/STARD13/PIAS2/ZFAND2A/MAP3K6/SYT7/LDB2/CBFA2T2/RSAD2/AURKB/DAPL1/CD8A/REEP6/TRIP10/ADIPOQ/ARHGAP29/LY86/RAB3D/H2AFY/SMAD5-AS1/RAB36/ARHGEF10/MICAL2/N4BP1/VGLL4/NUP93/RAPGEF2/ULK2/USP6NL/CD79A/ZBTB39/TELO2/IQSEC1/FGF19/NR1H4</p> | 610 |
| GO:0044767 | single-organism developmental process | 372/901 | 5251/17046 | 5.16E-12 | 3.84E-09 | 3.02E-09 | <p>ABI1/CDH3/CDH13/FARP1/CDKN1C/SPEG/SPON2/ZBTB18/TACC2/PDPN/DMRT2/CELF1/TBR1/GJB6/TMED10/LECT1/ESM1/CHI3L1/CHRNA1/GPRIN1/FAT3/CLN5/FRMD6/CCR1/SLC38A10/SEZ6/CNP/COL9A3/COL11A1/COMP/SCLT1/ZFP42/ADM/IL31RA/CPS1/CRABP1/ZNF358/FAM101A/APCDD1/CSTA/CTGF/SMYD1/SH3D19/CYLD/ADRB3/ESCO2/CYP11A1/RNF168/BHLHA15/COCH/DIO3/DLG2/DMBT1/DNMT3A/DRD4/ECE1/EEF2/EFNA2/EGFR/EGR3/EIF4G1/A2M/ELK4/TMEM17/EML1/UNC13D/EPHA1/EPHA3/EPHB4/ESR1/SP8/FGA/FGF10/RASA3/VASH1/BTBD3/SBNO2/ACIN1/FOXL1/FOX2/FOXO1/EXPH5/AKR1B1/SPG20/NFASC/EPB41L3/FLNB/DIP2A/FLOT2/NEDD4L/SYNE1/PSD3/ARHGEF18/RYPB/MORC3/MAPK8IP2/TSSK2/VGLL2/MTOR/DFNB31/TENM4/GAS2/LCE2B/GATM/GAPDH/FGF22/NPTN/GJB2/SDCBP2/DKK3/VPS4A/BMP10/GNAS/GPER1/FFAR2/FLVCR1/GSTP1/TMOD4/NME7/ANXA2/SOX8/KCNIP2/NRG1/HLA-B/HLA-DOA/ANXA13/HLX/HMGA1/NR4A1/ACACB/HPCA/APBA2/HOXB3/HOXC4/HOXC5/HOXC6/HOXD3/HSD11B1/HSD17B2/HSP90AA1/HSP90AB1/HTR5A/ID3/RSP02/FMN1/BARHL2/IGF1/IGF2/CYR61/LCE1C/LCE1D/LCE2D/IL1RN/IL6/AQP2/IL11RA/FOXK2/AQP5/INHBA/IRF1/ISL1/ITGA7/ITGB2/ITGB7/IVL/JUP/HILS1/KCNJ8/KDR/ACAT1/AMIGO3/INSC/HES5/SLC6A17/RESP18/AFF3/LAMA3/STMN1/LCK/ARHGDI1/LGALS9/LHCGR/LLGL1/LMNA/LMO2/LOX/LTB/SMAD3/MC2R/MEF2D/MAP3K1/MEOX1/MEOX2/MFI2/MFNG/MGAT1/MITF/LHX8/MYL2/DRG1/NEU1/NFATC3/NHLH2/NOV/NPPC/NRAS/NTF3/ATP5B/PALM/PARK2/UTP11L/LEF1/CEND1/ANGPT4/C11orf73/SIRT6/PDE6B/ATP8A2/PIK3CG/PITX2/PKH1/PKM/PLA2G2A/PLAGL1/PML/RIPPLY3/RIPK4/CYT11/SSH1/MOV10L1/ROBO4/MXRA8/FBLIM1/BNC2/PALMD/BANP/HERC6/PPP1CC/PIWIL2/ELP3/PRMT6/SMPD3/CHRNA9/LIMS2/PARVA/IFT122/ERMARD/MCTP2/CSGALNACT1/PRKD1/BIN3/MAPK3/MAP2K2/MRAP/HTRA1/CDC42SE1/PSMB4/RGMA/TRPC7/PSMD7/TENM2/ERMN/RHD14/METTL14/MARK4/PXN/ACTA2/RASGRF2/RPL29/S100A4/S100A6/BGLAP/SCT/CCL11/CCL17/STRA6/SFRP2/CXCR5/TRA2B/GZF1/DNAI2/SGK1/TMEM237/VPS33A/BMP4/SLC8A1/BMPR1B/SLIT1/BOK/SOX9/STK3/SUPT6H/BST2/TAF4B/TCEA1/ZEB1/ACTC1/TEAD3/TGM2/TCHH/TIMP3/TLF3/TLR5/TNFAIP3/TNFRSF1A/TRPC4/TRPC6/PHLDA2/TWIST1/CCR2/UCP1/WNT10B/YWHAG/ZAP70/ZNF7/PTP4A1/CACNB2/PAX8/CXCR4/FZD5/PPDPF/LST1/TMEM204/ZC3H12A/C6orf25/COL18A1/CALR/SLRP/COLQ/CAST/CAPZB/SCR11/SPATA16/ANTXR1/BFSP2/NROB2/CASQ1/HOPX/PARD6B/TTBK1/KDM2B/LOXL3/CBX2/IFITM1/GAS7/SCIN/RUNX1/TP63/RUNX3/IRS2/ACTN1/FADD/TNFRSF11A/ALDH1A2/SPHK1/LIMD1/PIAS2/LDB2/CBFA2T2/RSAD2/AURKB/DAPL1/CD8A/ADIPOQ/H2AFY/MTLS/ARHGEF10/MICAL2/RAPGEF2/ULK2/CD79A/FGF19</p>                                                                                                                                                                                                                                                                                                                                                                                                                                                                                                                                                                                                                                                                                                                                                                                                                                                                                                                                                                                                                                                                                                                                                                                                                                                                                                                                                                                                                                                                                                                                                                                     | 372 |

|            |                       |         |            |          |          |          |                                                                                                                                                                                                                                                                                                                                                                                                                                                                                                                                                                                                                                                                                                                                                                                                                                                                                                                                                                                                                                                                                                                                                                                                                                                                                                                                                                                                                                                                                                                                                                                                                                                                                                                                                                                                                                                                                                                                                                                                                                                                                                                                                                                                                                                                                                                                                                                                                                                                                                                                                                                                                                                                                                                                                                                                                                                                                                                                                                                                                                                                                                                                                                                                                   |     |
|------------|-----------------------|---------|------------|----------|----------|----------|-------------------------------------------------------------------------------------------------------------------------------------------------------------------------------------------------------------------------------------------------------------------------------------------------------------------------------------------------------------------------------------------------------------------------------------------------------------------------------------------------------------------------------------------------------------------------------------------------------------------------------------------------------------------------------------------------------------------------------------------------------------------------------------------------------------------------------------------------------------------------------------------------------------------------------------------------------------------------------------------------------------------------------------------------------------------------------------------------------------------------------------------------------------------------------------------------------------------------------------------------------------------------------------------------------------------------------------------------------------------------------------------------------------------------------------------------------------------------------------------------------------------------------------------------------------------------------------------------------------------------------------------------------------------------------------------------------------------------------------------------------------------------------------------------------------------------------------------------------------------------------------------------------------------------------------------------------------------------------------------------------------------------------------------------------------------------------------------------------------------------------------------------------------------------------------------------------------------------------------------------------------------------------------------------------------------------------------------------------------------------------------------------------------------------------------------------------------------------------------------------------------------------------------------------------------------------------------------------------------------------------------------------------------------------------------------------------------------------------------------------------------------------------------------------------------------------------------------------------------------------------------------------------------------------------------------------------------------------------------------------------------------------------------------------------------------------------------------------------------------------------------------------------------------------------------------------------------------|-----|
| GO:0032502 | developmental process | 376/901 | 5327/17046 | 6.04E-12 | 4.00E-09 | 3.14E-09 | ABI1/CDH3/CDH13/FARP1/CDKN1C/SPEG/SPON2/ZBTB18/TACC2/PDPN/DMRT2/CELF1/TBR1/GJB6/TMED10/LECT1/ESM1/CHI3L1/CHRNA1/GPRIN1/FAT3/CLN5/FRMD6/CCR1/SLC38A10/SEZ6/CNP/COL9A3/COL11A1/COMP/SLC11/ZFP42/ADM/IL131RA/CPM/CP51/CRABP1/ZNF358/FAM101A/APCDD1/CSTA/CTGF/SMYD1/SH3D19/CYLD/ADRB3/ESCO2/CYP11A1/RNF168/BHLHA15/COCH/DIO3/DLG2/DMBT1/DNMT3A/DRD4/ECE1/EEF2/EFNA2/EGFR/EGR3/EIF4G1/A2M/ELK4/TMEM17/EML1/UNC13D/EPHA1/EPHA3/EPHB4/ESR1/SP8/FGA/FGF10/RASA3/VASH1/BTBD3/SBNO2/ACIN1/FOXL1/FOXC2/FOXO1/EXPH5/AKR1B1/SPG20/NFASC/EPB41L3/FLNB/DIP2A/FLOT2/NEDD4L/SYNE1/PSD3/ARHGEF18/RYPB/MORC3/MAPK8IP2/TSSK2/VGLL2/MTOR/DFNB31/TENM4/GAS2/LCE2B/GATM/GAPDH5/FGF22/NPTN/GJB2/SDCBP2/DKK3/VPS4A/BMP10/GNAS/GPER1/FFAR2/FLVCR1/GSTP1/TMOD4/NME7/ANXA2/SOX8/KCNIP2/NRG1/HLA-B/HLA-DOA/ANXA13/HLX/HMGA1/NR4A1/ACACB/HPCA/APBA2/HOXB3/HOXC4/HOXC5/HOXC6/HOXC7/HSD11B1/HSD17B2/HSP90AA1/HSP90AB1/HTR5A/TFAP2E/ID3/RSPO2/FMN1/BAHRL2/IGF1/IGF2/CYR61/LCE1C/LCE1D/LCE2D/IL1RN/IL6/AQP2/IL11RA/FOXK2/AQP5/INHBA/IRF1/ISL1/ITGA7/ITGB2/ITGB7/IVL/JUP/HILS1/KCNJ8/KDR/ACAT1/KRT15/AMIGO3/INSC/HES5/SLC6A17/RESP18/AFF3/LAMA3/STMN1/LCK/ARHGDI1/LGALS9/LHCGR/LLGL1/LMNA/LMO2/LOX/LTB/SMAD3/MC2R/MEF2D/MAP3K1/MEOX1/MEOX2/MFI2/MFNG/MGAT1/MITF/LHX8/MYL2/DRG1/NEU1/NFATC3/NHLH2/NOV/NPPC/NRAS/NTF3/ATP5B/PALM/PARK2/UTP11L/LEF1/CEND1/ANGPT4/C11orf73/SIRT6/PDE6B/ATP8A2/PIK3CG/PITX2/PKHD1/PKM/PLA2G2A/PLAGL1/PML/RIPPLY3/RIPK4/CYTL1/SSH1/MOV10L1/ROBO4/MXRA8/FBLIM1/BNC2/PALMD/BANP/HERC6/PPP1CC/PIWIL2/ELP3/PRMT6/SMPD3/CHRNA9/LIMS2/PARVA/IFT122/ERMARD/MCTP2/CSGALNACT1/PRKD1/BIN3/MAPK3/MAP2K2/MRAP/SGOL1/CDC42SE1/PSMB4/RGMA/TRPC7/PSMD7/TENM2/ERMN/RDH14/METTL14/MARK4/PXN/ACTA2/RASGRF2/RPL29/S100A4/S100A6/BGLAP/SCT/CCL11/CCL17/NPAS3/STRA6/SFRP2/CXCR5/TRA2B/GZF1/DNAI2/SGK1/TMEM237/VPS33A/BMP4/SLC8A1/BMPR1B/SLIT1/BOK/SOX9/STK3/SUPT6H/BST2/TAF4B/TCEA1/ZEB1/ACTC1/TEAD3/TGM2/TCHH/TIMP3/TLE3/TLR5/TNFAIP3/TNFRSF1A/TRPC4/TRPC6/PHLDA2/TWIST1/CCR2/UCP1/WNT10B/YWHAG/ZAP70/ZNF7/PTP4A1/CACNB2/PAX8/CXCR4/FZD5/PPDPF/LST1/TMEM204/ZC3H12A/C6orf25/COL18A1/CALR/SLURP/COLQ/CAST/CAPZB/SCRT1/SPATA16/ANTXR1/BFSP2/NR0B2/CASQ1/HOPX/PARD6B/TTBK1/KDM2B/LOXL3/CBX2/IFITM1/GAS7/SCIN/RUNX1/TP63/RUNX3/IRS2/ACTN1/FADD/TNFRSF11A/ALDH1A2/SPHK1/LIMD1/PIAS2/LDB2/CBF A2T2/RSAD2/AURKB/DAPL1/CD8A/ADIPOQ/H2AFY/MTLS/ARHGEF10/MICAL2/RAPGEF2/ULK2/CD79A/FGF19                                                                                                                                                                                                                                                                                                                                                                                                                                                                                                                                                                                                                                                                                                                                                                                                                                                                 | 376 |
| GO:0050896 | response to stimulus  | 502/901 | 7634/17046 | 8.90E-12 | 5.30E-09 | 4.17E-09 | AKT3/ABI1/CDH3/TANK/TSPAN5/CDH13/FARP1/KLRG1/RCAN2/KCNMB2/CDKN1C/TCIRG1/MRVI1/SPON2/PDPN/TBR1/GJB6/HCS2/NPFFR2/ADCY3/TMED10/LECT1/ESM1/HNRNPUL1/CHGA/CHI3L1/ERLIN2/PSIP1/EGLN2/TP53TG1/PTH2/PDAP1/CHRNA1/CHRNA2/CHRNA5/SORCS1/CIDEA/AP351/CCR1/SEZ6/TNFAIP8L1/CNP/COL9A3/COL11A1/MAP3K8/ADM/IL131RA/HUS1B/OR2A14/CP51/PXDNL/CRABP1/TRPM6/MIB2/PARP4/MPP7/APCDD1/CTGF/SGOL1/PPM1L/CYLD/ADRB3/ESCO2/CYP11A1/TRPV3/CITED4/DBB1/DDOST/RNF168/ZNF366/BHLHA15/COCH/NLRP6/DMBT1/DNMT3A/ABAT/DRD4/DTNA/AGXT/EFNA2/EGFR/EGR3/EIF4G1/A2M/ANKRD23/TMEM17/UNC13D/EPHA1/EPHA3/EPHB4/ESR1/F11/SPATA13/FCGR2A/FGA/FGF10/FHIT/RASA3/PPM1E/VASH1/SBNO2/MSRB2/ACIN1/FOXL1/FOXC2/FOXO1/AKR1B1/SPG20/NFASC/FLNB/MLC1/RHOBTB2/NUP210/NEDD4L/PSD3/LARP1/PPP1R13B/PUM2/ARHGEF18/MAPK8IP2/TSSK2/MTOR/SLC37A4/GABBR1/RASGEF1C/ALS2CL/TENM4/ACOT11/RGS22/STEAP2/FBXL21/FBXO2/GATM/PLEK2/ADGRF1/RP56KC1/GJA3/DNAJC2/FGF22/NPTN/GJB2/SDCBP2/PDE7B/DKK3/CYTH4/GPR162/BMP10/GNAS/GPR26/GPER1/FFAR2/GRB10/GRIK4/DNAJC15/SCG3/GSTP1/GUCY1A3/NME7/GPR132/GZMA/ANXA2/HAS1/SERPIND1/SOX8/KCNIP2/NRG1/ANXA6/HK1/HLA-B/HLA-DOA/HLA-DPA1/HLA-E/HLA-F/HLX/HMGA1/NR4A1/HPCA/HOXD3/HRH1/HSD17B2/HSPA1L/HSP90AA1/HSP90AB1/HTR3A/HTR5A/ID3/RSPO2/CD300E/IGF1/IGF2/CYR61/GPR142/LCE1D/IL1R1/IL1RN/IL6/IL10RA/AQP2/IL11RA/IL12RB2/IL15RA/IL16/INHBA/IRF1/AQP9/ISL1/ITGA7/ITGB2/ITGB7/ITIH4/IVL/JUP/CD82/KCNH2/KCNJ8/KCNMB1/KDR/ACAT1/IPO5/KRT15/HES5/AFF3/STMN1/OR2A5/LCK/LCP1/LDLR/ARHGDI1/LGALS9/LHCGR/LLGL1/LMNA/LMO2/RAB19/LOX/LTB/LTBP1/SMAD3/MC2R/MCC/ME1/MAP3K1/MFNG/SCGB2A1/MITF/ASGR1/MOV10/PLEKHG7/MT1A/NUDT1/MYH4/NDUFB4/NEDD9/ATP1A2/NFATC3/NMBR/NOV/NPPC/NRAS/NTF3/OAS2/OPRL1/OR2C1/OR3A2/SLC22A18/P2RY6/IL21R/PALM/ARHGEF3/PARK2/SPOCK3/LEF1/DDX47/ANGPT4/PDE4C/PDE7A/C11orf73/SIRT6/PDE6B/ATP8A2/PGAM2/PIK3CG/PITX2/PKHD1/PKM/PLA2G2A/PRKAG3/PML/GPR84/IL20RB/PNLIP/TLR9/TREM1/CYTL1/POMC/SSH1/PON1/RIN2/POU2AF1/ZDHHC13/APBB1P/CYP2W1/PPP1CB/PPP1CC/ARHGEF10L/PRMT6/FANCI/MOB1A/SLC47A1/WDR33/SLC30A10/CHRNA9/SYBU/LIMS2/VAC14/PARVA/PRKAR1B/IFT122/MCTP2/LMBRD1/PAG1/PRKD1/WSB2/BIN3/MAPK3/MAP2K2/PRKRIR/PROC/MASP1/HTRA1/SLAMF8/CDC42SE1/PSMB4/PAK6/ARNTL2/RGMA/TRPC7/LPAR5/PSMD7/PTGFR/PLEKHG5/TENM2/CCAR2/PTPRCAP/PTPRE/PXN/CREBZF/ACTA2/RASGRF2/RFC2/TRIM27/RGR/RGS12/RIT2/RPA3/DEFB134/S100A4/S100A6/BGLAP/SCT/CCL11/CCL17/NPAS3/NOD2/TINAGL1/STRA6/SFRP2/CXCR5/ARHGAP9/SGK1/SYNDIG1L/MICAL1/TMEM237/VPS33A/BMP4/SLC8A1/SLC9A3/BMPR1B/SLIT1/BOK/SOX9/BPI/SRP68/STAT2/STK3/STK10/SUPT6H/BST2/VAMP2/TCEA1/TCEB2/ZEB1/ACTC1/TEAD3/TERF1/TGM2/TIMP3/TLE3/TLR5/TNFAIP3/TNFRSF1A/TNXPB/TRA1/TRA5/TRPC4/TRPC6/TRPM2/TWIST1/CCR2/TNFRSF4/UPPP1/WNT10B/YWHAG/ZAP70/CA7/CACNA1E/CACNB2/PAX8/CXCR4/FZD5/RAB7A/CARD14/BCL2L14/LST1/TMEM204/NLRX1/GPR157/ZC3H12A/FAAP100/CPEB4/C6orf25/COL18A1/EEPD1/CALR/UNC93B1/CAPS/CAPZB/HIST1H3A/ANTXR1/SLA2/CMAPB/BFSP2/NR0B2/CASQ1/HOPX/IL1F10/TRIM63/MGARP/RAE1/IFITM1/CDK10/KMO/RUNX1/TP63/RUNX3/IRS2/ACTN1/CRADD/FADD/TNFRSF11A/ALDH1A2/SPHK1/ENDOU/SKAP2/STBD1/HSPB3/LIMD1/TSPAN18/CCRL2/MAP7/PRC1/STARD13/PIAS2/ZFAND2A/MAP3K6/SYT7/ESAM/SLC16A3/RSAD2/AURKB/DAPL1/RCS1/IL32/CD8A/TRIP10/ADIPOQ/ARHGAP29/LY86/RAB3D/SMAD5-AS1/RAB36/MTLS/ARHGEF10/N4BP1/NUP93/RAPGEF2/ULK2/CD79A/TELO2/IQSEC1/FGF19/NR1H4 | 502 |

|            |                                      |         |            |          |          |          |                                                                                                                                                                                                                                                                                                                                                                                                                                                                                                                                                                                                                                                                                                                                                                                                                                                                                                                                                                                                                                                                                                                                                                                                                                                                                                                                                                                                                                                                                                                                                                                                                                                                                                                                                                                                                                                                                                                                                                                                                                                                                                                                                                                                                                                                                                                                                                                                                                                                                                                                                                                                                                                                                                           |     |
|------------|--------------------------------------|---------|------------|----------|----------|----------|-----------------------------------------------------------------------------------------------------------------------------------------------------------------------------------------------------------------------------------------------------------------------------------------------------------------------------------------------------------------------------------------------------------------------------------------------------------------------------------------------------------------------------------------------------------------------------------------------------------------------------------------------------------------------------------------------------------------------------------------------------------------------------------------------------------------------------------------------------------------------------------------------------------------------------------------------------------------------------------------------------------------------------------------------------------------------------------------------------------------------------------------------------------------------------------------------------------------------------------------------------------------------------------------------------------------------------------------------------------------------------------------------------------------------------------------------------------------------------------------------------------------------------------------------------------------------------------------------------------------------------------------------------------------------------------------------------------------------------------------------------------------------------------------------------------------------------------------------------------------------------------------------------------------------------------------------------------------------------------------------------------------------------------------------------------------------------------------------------------------------------------------------------------------------------------------------------------------------------------------------------------------------------------------------------------------------------------------------------------------------------------------------------------------------------------------------------------------------------------------------------------------------------------------------------------------------------------------------------------------------------------------------------------------------------------------------------------|-----|
| GO:0007275 | multicellular organismal development | 329/901 | 4527/17046 | 9.99E-12 | 5.41E-09 | 4.25E-09 | ABI1/CDH3/CDH13/FARP1/CDKN1C/SPEG/SPON2/ZBTB18/TACC2/PDPN/DMRT2/CELF1/TBR1/GJB6/TMED10/LECT1/ESM1/CHI3L1/CHRNA1/GPRIN1/FAT3/CLN5/CCR1/SLC38A10/SEZ6/CNP/COL9A3/COL11A1/COMP/SCLT1/ZFP42/ADM/IL131RA/CP51/CRABP1/ZNF358/FAM101A/APCDD1/CSTA/CTGF/SMYD1/CYLD/ESCO2/CYP11A1/RNF168/DLG2/DMBT1/DNMT3A/DRD4/ECE1/EEF2/EFNA2/EGFR/EGR3/EIF4G1/EML1/EPHA1/EPHA3/EPHB4/ESR1/SP8/FGA/FGF10/RASA3/VASH1/BTBD3/SBNO2/ACIN1/FOXL1/FOXC2/FOXO1/EXPH5/AKR1B1/SPG20/NFASC/EPB41L3/FLNB/DIP2A/NEDD4L/PSD3/RYPB/MORC3/MAPK8IP2/TSSK2/VGLL2/MTOR/DFNB31/TENM4/LCE2B/GATM/FGF22/NPTN/GJB2/SDCBP2/DKK3/VPS4A/BMP10/GNAS/GPER1/FLVCR1/GSTP1/NME7/ANXA2/SOX8/KCNIP2/NRG1/HLA-B/HLA-DOA/HLX/NR4A1/ACACB/HPCA/APBA2/HOXB3/HOXC4/HOXC5/HOXC6/HOXC7/HSD11B1/HSD17B2/HSP90AA1/HSP90AB1/HTR5A/ID3/RSP02/FMN1/BARHL2/IGF1/IGF2/CYR61/LCE1C/LCE1D/LCE2D/IL1RN/IL6/AQP2/AQP5/INHBA/IRF1/ISL1/ITGA7/ITGB2/IVL/JUP/HILS1/KCNJ8/KDR/ACAT1/AMIGO3/INSC/HES5/SLC6A17/RESP18/AFF3/LAMA3/STMN1/LCK/A RHGDIA/LGALS9/LHCGR/LLGL1/LMNA/LMO2/LOX/LTB/SMAD3/MC2R/MEF2D/MAP3K1/MEOX1/MEOX2/MFNG/MGAT1/MITF/LHX8/MYL2/DRG1/NEU1/NFATC3/NHLH2/NOV/NP PC/NRAS/NTF3/ATP5B/PALM/PARK2/UTP11L/LEF1/CEND1/ANGPT4/C11orf73/SIRT6/PDE6B/ATP8A2/PIK3CG/PITX2/PKH1/PKM/PLAGL1/PML/RIPPLY3/CYTL1/SSH1/MOV10L1/ROBO4/MXRA8/BNC2/BANP/HERC6/PPP1CC/PIWIL2/ELP3/SMPD3/CHRNA9/LIMS2/PARVA/IFT122/ERMARD/MCTP2/CSGALNACT1/PRKD1/BIN3/MAPK3/MAP2K2/HTRA1/PSMB4/RGMA/TRPC7/PSMD7/TENM2/MARK4/PXN/ACTA2/RASGRF2/RPL29/S100A4/S100A6/BGLAP/SCT/CCL11/CCL17/STRA6/SFRP2/CXCR5/TRA2B/GZF1/DNAI2/SGK1/VPS33A/BMP4/SLC8A1/BMPR1B/SLIT1/BOK/SOX9/STK3/SUPT6H/BST2/TCEA1/ZEB1/ACTC1/TGM2/TCHH/TIMP3/TLE3/TLR5/TNFAIP3/TNFRSF1A/TRPC4/TRPC6/PHLDA2/TWIST1/CCR2/WNT10B/YWHAG/ZAP70/ZNF7/PTP4A1/CACNB2/PAX8/CXCR4/FZD5/PPDPF/LST1/TMEM204/ZC3H12A/C6orf25/COL18A1/CALR/COLQ/CAST/SCRT1/SPATA16/BFSP2/NROB2/CASQ1/HOPX/PARD6B/TTBK1/KDM2B/LOXL3/CBX2/GAS7/SCIN/RUNX1/TP63/RUNX3/IRS2/ACTN1/FADD/TNFRSF11A/ALDH1A2/SPHK1/LIMD1/LDB2/CBFA2T2/RSAD2/AURKB/CD8A/ADIPOQ/H2AFY/MTL5/ARHGEF10/MICAL2/RAPGEF2/ULK2/CD79A/FGF19                                                                                                                                                                                                                                                                                                                                                                                                                                                                                                                                                                                                                                                               | 329 |
| GO:0048856 | anatomical structure development     | 340/901 | 4751/17046 | 2.65E-11 | 1.32E-08 | 1.04E-08 | ABI1/CDH3/CDH13/FARP1/CDKN1C/SPEG/SPON2/ZBTB18/TACC2/PDPN/DMRT2/CELF1/TBR1/GJB6/TMED10/LECT1/ESM1/CHI3L1/CHRNA1/GPRIN1/CLN5/FRMD6/CCR1/SLC38A10/SEZ6/CNP/COL9A3/COL11A1/COMP/SCLT1/ZFP42/ADM/IL131RA/CPM/CP51/ZNF358/FAM101A/APCDD1/CSTA/CTGF/SMYD1/SH3D19/CYLD/ESCO2/CYP11A1/RNF168/BHLHA15/COCH/DLG2/DMBT1/DNMT3A/DRD4/ECE1/EEF2/EFNA2/EGFR/EGR3/EIF4G1/TMEM17/EML1/UNC13D/EPHA1/EPHA3/EPHB4/ESR1/SP8/FGA/FGF10/RASA3/VASH1/BTBD3/SBNO2/ACIN1/FOXL1/FOXC2/FOXO1/EXPH5/AKR1B1/SPG20/NFASC/EPB41L3/FLNB/FLOT2/NEDD4L/SYNE1/PSD3/ARHGEF18/MAPK8IP2/TSSK2/VGLL2/MTOR/DFNB31/TENM4/GAS2/LCE2B/GATM/GAPDH5/FGF22/NPTN/GJB2/SDCBP2/DKK3/BMP10/GNAS/GPER1/FLVCR1/GSTP1/TMOD4/NME7/ANXA2/SOX8/KCNIP2/NRG1/HLA-B/HLA-DOA/HLX/NR4A1/ACACB/HPCA/APBA2/HOXB3/HOXC4/HOXC5/HOXC6/HOXC7/HSD11B1/HSD17B2/HSP90AA1/HSP90AB1/HTR5A/TFAP2E/ID3/RSP02/FMN1/BARHL2/IGF1/IGF2/CYR61/LCE1C/LCE1D/LCE2D/IL1RN/IL6/AQP2/IL11RA/FOXK2/AQP5/INHBA/IRF1/ISL1/ITGA7/ITGB2/ITGB7/IVL/JUP/HILS1/KCNJ8/KDR/ACAT1/KRT15/AMIGO3/INSC/HES5/SLC6A17/RESP18/AFF3/LAMA3/STMN1/LCK/ARHGDI A/LGALS9/LHCGR/LLGL1/LMNA/LMO2/LOX/LTB/SMAD3/MC2R/MEF2D/MAP3K1/MEOX1/MEOX2/MFI2/MGAT1/MITF/LHX8/MYL2/NEU1/NFATC3/NHLH2/NOV/NPPC/NRAS/NTF3/ATP5B/PALM/PARK2/UTP11L/LEF1/CEND1/ANGPT4/C11orf73/SIRT6/PDE6B/ATP8A2/PIK3CG/PITX2/PKH1/PKM/PLAGL1/PML/RIPPLY3/RIPK4/CYTL1/SSH1/MOV10L1/ROBO4/MXRA8/FBLIM1/BNC2/PALMD/HERC6/PPP1CC/PIWIL2/ELP3/SMPD3/CHRNA9/LIMS2/PARVA/IFT122/CSGALNACT1/PRKD1/BIN3/MAPK3/MAP2K2/HTRA1/CD42SE1/PSMB4/RGMA/TRPC7/PSMD7/TENM2/ERMN/MARK4/PXN/ACTA2/RASGRF2/S100A4/S100A6/BGLAP/SCT/CCL11/CCL17/STRA6/SFRP2/CXCR5/TRA2B/GZF1/DNAI2/SGK1/TMEM237/VPS33A/BMP4/SLC8A1/BMPR1B/SLIT1/BOK/SOX9/STK3/SUPT6H/TAFA4B/TCEA1/ZEB1/ACTC1/TEAD3/TGM2/TCHH/TIMP3/TLE3/TLR5/TNFAIP3/TNFRSF1A/TRPC4/TRPC6/PHLDA2/TWIST1/CCR2/WNT10B/YWHAG/ZAP70/CACNB2/PAX8/CXCR4/FZD5/PPDPF/LST1/TMEM204/ZC3H12A/C6orf25/COL18A1/CALR/SLIRP/COLQ/CAST/CAPZB/SCRT1/ANTXR1/BFSP2/NROB2/CASQ1/HOPX/PARD6B/TTBK1/KDM2B/LOXL3/GAS7/SCIN/RUNX1/TP63/RUNX3/IRS2/ACTN1/FADD/TNFRSF11A/ALDH1A2/SPHK1/LIMD1/LDB2/CBFA2T2/RSAD2/CD8A/ADIPOQ/H2AFY/ARHGEF10/MICAL2/RAPGEF2/ULK2/CD79A/FGF19                                                                                                                                                                                                                                                                                                                                                                                                                                                                                                                                                                              | 340 |
| GO:0032501 | multicellular organismal process     | 433/901 | 6425/17046 | 4.64E-11 | 2.12E-08 | 1.67E-08 | ABI1/CDH3/CDH13/FARP1/RCAN2/KCNMB2/CDKN1C/SPEG/MRVI1/TRDN/SPON2/ZBTB18/TACC2/PDPN/DMRT2/CELF1/CELF2/TBR1/GJB6/ADCY3/TMED10/LECT1/ESM1/ADAM29/CHGA/CHI3L1/CHRNA1/CHRNA2/CHRNA5/GPRIN1/CIDEA/FAT3/CLN5/CCR1/ZG16B/SLC38A10/SEZ6/CNP/COL9A3/COL11A1/COMP/SCLT1/ZFP42/ADM/IL131RA/OR2A14/CP51/CRABP1/ZNF358/CRYBB3/FAM101A/APCDD1/CSTA/CTGF/SMYD1/CYLD/ADRB3/ESCO2/CYP11A1/TRPV3/RNF168/COCH/NLRP6/DIO3/DLG2/DMBT1/DNMT3A/ABAT/DRD4/DTNA/EC E1/EEF2/EFNA2/EGFR/EGR3/EIF4G1/A2M/EML1/EPHA1/EPHA3/EPHB4/ESR1/F11/FAT2/SP8/FGA/FGF10/XRN2/RASA3/VASH1/BTBD3/SBNO2/ACIN1/FOXL1/FOXC2/FOXO1/EXPH5/AKR1B1/SPG20/NFASC/EPB41L3/FLNB/DIP2A/NEDD4L/PSD3/RYPB/MORC3/MAPK8IP2/TSSK2/VGLL2/MTOR/DFNB31/PNKD/TENM4/LCE2B/GATM/GAPDH5/GJA3/FGF22/NPTN/GJB2/AMPD2/SDCBP2/DKK3/VPS4A/AMPD3/BMP10/GNAS/IZUMO1/GPER1/FFAR2/FLVCR1/SCG3/GSTP1/TMOD4/GUCY1A3/NME7/ANXA2/HAS1/SERPIND1/SOX8/KCNIP2/NRG1/ANXA6/HLA-B/HLA-DOA/HLA-DPA1/HLA-E/HLX/NR4A1/ACACB/HPCA/APBA2/HOXB3/HOXC4/HOXC5/HOXC6/HOXC7/HRH1/HSD11B1/HSD17B2/ACADL/HSP90AA1/HSP90AB1/HTR3A/HTR5A/ID3/RSP02/FMN1/BARHL2/IGF1/IGF2/CYR61/LCE1C/LCE1D/LCE2D/IL1R1/IL1RN/IL6/AQP2/IL12RB2/AQP5/INHBA/IRF1/AQP9/ISL1/ITGA7/ITGB2/IVL/JUP/HILS1/KCNH2/KCNJ8/KCNMB1/KDR/ACAT1/AMIGO3/INSC/HES5/SLC6A17/RESP18/AFF3/LAMA3/STMN1/OR2A5/LCK/LDLR/ARHGDI A/LGALS9/LHCGR/LLGL1/LMNA/LMO2/LOX/LTB/SMAD3/MC2R/MEF2D/MAP3K1/MEOX1/MEOX2/MFNG/MGAT1/MITF/LHX8/MYH4/MYL2/DRG1/NEU1/ATP1A2/NFATC3/NHLH2/NOV/NPPC/NRAS/NTF3/OPRL1/OR2C1/OR3A2/SLC22A18/ATP5B/PALM/PARK2/UTP11L/LEF1/CEND1/ANGPT4/C11orf73/SIRT6/PDE6B/ATP8A2/PAGAM2/PIK3CG/PITX2/PKH1/PKM/PLA2G2A/PLAGL1/SPA17/PML/RIPPLY3/IL20RB/PNLIP/TLR9/TREM1/CYTL1/POMC/SSH1/MOV10L1/APBB1P/ROBO4/MXRA8/BNC2/BANP/PPP1CB/HERC6/PPP1CC/PIWIL2/ELP3/WDR33/SMPD3/CHRNA9/LIMS2/PARVA/PRKAR1B/IFT122/ERMARD/MCTP2/CSGALNACT1/PRKD1/BIN3/MAPK3/MAP2K2/PROC/HTRA1/PSMB4/RGMA/TRPC7/PSMD7/SLURP1/PTGFR/PLEKHG5/TENM2/ERMN/RDH14/METT14/MARK4/PXN/ACTA2/RASGRF2/TRIM27/RGR/RPL29/S100A4/S100A6/BGLAP/SCT/CCL11/CCL17/NPAS3/NOD2/STRA6/SFRP2/CXCR5/TRA2B/GZF1/DNAI2/SGK1/VPS33A/BMP4/SLC8A1/BMPR1B/SLIT1/BOK/SOX9/BPI/STK3/SUPT6H/BST2/TAFA4B/TBP/TCEA1/ZEB1/ACTC1/TEAD3/TGM2/TCHH/TIMP3/TLE3/TLR5/TNFAIP3/TNFRSF1A/TNXP/TRPC4/TRPC6/PHLDA2/TWIST1/CCR2/TNFRSF4/WNT10B/YWHAG/ZAP70/ZNF7/CACNA1E/PTP4A1/CACNB2/PAX8/CXCR4/FZD5/RAB7A/PPDPF/LST1/TMEM204/NLRX1/CALD1/ZC3H12A/RAB11FIP1/C6orf25/COL18A1/CALR/SLIRP/COLQ/CAST/CAPZB/SH3BGR1/SCRT1/HIST1H3A/SPATA16/BFSP2/NROB2/CASQ1/HOPX/PARD6B/TTBK1/TRIM63/KDM2B/LOXL3/CBX2/IFITM1/GAS7/SCIN/RUNX1/TP63/RUNX3/IRS2/ACTN1/FADD/TNFRSF11A/ALDH1A2/SPHK1/CCNA1/ENDOU/STBD1/LIMD1/PIAS2/LDB2/ESAM/SLC16A3/CBFA2T2/RSAD2/AURKB/RCS1/CD8A/ADIPOQ/H2AFY/MTL5/ARHGEF10/MICAL2/RAPGEF2/ULK2/CD79A/FGF19 | 433 |

|            |                                           |         |            |          |          |          |                                                                                                                                                                                                                                                                                                                                                                                                                                                                                                                                                                                                                                                                                                                                                                                                                                                                                                                                                                                                                                                                                                                                                                                                                                                                                                                                                                                                                                                                                                                                                                                                                                                                                                                                                                                                                                                                                                                                                                                                                                                                                                                                                                                                                                                                                                                                                                                                                                                                                                                                                                                                            |     |
|------------|-------------------------------------------|---------|------------|----------|----------|----------|------------------------------------------------------------------------------------------------------------------------------------------------------------------------------------------------------------------------------------------------------------------------------------------------------------------------------------------------------------------------------------------------------------------------------------------------------------------------------------------------------------------------------------------------------------------------------------------------------------------------------------------------------------------------------------------------------------------------------------------------------------------------------------------------------------------------------------------------------------------------------------------------------------------------------------------------------------------------------------------------------------------------------------------------------------------------------------------------------------------------------------------------------------------------------------------------------------------------------------------------------------------------------------------------------------------------------------------------------------------------------------------------------------------------------------------------------------------------------------------------------------------------------------------------------------------------------------------------------------------------------------------------------------------------------------------------------------------------------------------------------------------------------------------------------------------------------------------------------------------------------------------------------------------------------------------------------------------------------------------------------------------------------------------------------------------------------------------------------------------------------------------------------------------------------------------------------------------------------------------------------------------------------------------------------------------------------------------------------------------------------------------------------------------------------------------------------------------------------------------------------------------------------------------------------------------------------------------------------------|-----|
| GO:0044707 | single-multicellular organism process     | 419/901 | 6214/17046 | 1.36E-10 | 5.78E-08 | 4.55E-08 | ABI1/CDH3/CDH13/FARP1/RCAN2/KCNMB2/CDKN1C/SPEG/MRV1/TRDN/SPON2/ZBTB18/TACC2/PDPN/DMRT2/CELF1/CELF2/TBR1/GJB6/ADCY3/TMED10/LECT1/ESM1/CHGA/CHI3L1/CHRNA1/CHRNA2/CHRNA5/GPRIN1/CIDEA/FAT3/CLN5/CCR1/ZG16B/SLC38A10/SEZ6/CNP/COL9A3/COL11A1/COMP/SCLT1/ZFP42/ADM/IL13RA/OR2A14/CP51/CRABP1/ZNF358/CRYBB3/FAM101A/APCDD1/CSTA/CTGF/SMYD1/CYLD/ADRB3/ESCO2/CYP11A1/TRPV3/RNF168/COCH/NLRP6/DIO3/DLG2/DMBT1/DNMT3A/ABAT/DRD4/DTNA/ECE1/EEF2/EFNA2/EGFR/EGR3/EIF4G1/A2M/EML1/EPHA1/EPHA3/EPHB4/ESR1/F11/FAT2/SP8/FGA/FGF10/RASA3/VASH1/BTBD3/SBNO2/ACIN1/FOXL1/FOX2/FOXO1/EXPH5/AKR1B1/SPG20/NFASC/EPB41L3/FLNB/DIP2A/NEDD4/PSD3/RYPB/MORC3/MAPK8IP2/TSSK2/VGLL2/MTOR/DFNB31/PNKG/TENM4/LCE2B/GATM/GJA3/FGF22/NPTN/GJB2/AMPD2/SDCBP2/DK3/VPS4A/AMPD3/BMP10/GNAS/GPER1/FFAR2/FLVCR1/SCG3/GSTP1/TMOD4/GUCY1A3/NME7/ANXA2/SERPIND1/SOX8/KCNIP2/NRG1/ANXA6/HLA-B/HLA-DOA/HLA-DPA1/HLA-E/HLX/NR4A1/ACACB/HPCA/APBA2/HOXB3/HOXC4/HOXC5/HOXC6/HOXC7/HRH1/HSD11B1/HSD17B2/ACADL/HSP90AA1/HSP90AB1/HTR5A/ID3/RSPO2/FMN1/BARHL2/IGF1/IGF2/CYR61/LCE1C/LCE1D/LCE2D/IL1RN/IL6/AQP2/IL12RB2/AQP5/INHBA/IRF1/AQP9/ISL1/ITGA7/ITGB2/IVL/JUP/HLS1/KCNH2/KCNJ8/KCNMB1/KDR/ACAT1/AMIGO3/INSC/HES5/SLC6A17/RESP18/AFF3/LAMA3/STMN1/OR2A5/LCK/LDLR/ARHGDA/LGALS9/LHCGR/LLGL1/LMNA/LMO2/LOX/LTB/SMAD3/MC2R/MCC/MEF2D/MAP3K1/MEOX1/MEOX2/MFNG/MGAT1/MITF/LHX8/MYH4/MYL2/DRG1/NEU1/ATP1A2/NFATC3/NHLH2/NOV/NPPC/NRAS/NTF3/OPRL1/OR2C1/OR3A2/SLC22A18/ATP5B/PALM/PARK2/UTP11L/LEF1/CEND1/ANGPT4/C11orf73/SIRT6/PDE6B/ATP8A2/PGAM2/PIK3CG/PITX2/PKHD1/PKM/PLA2G2A/PLAGL1/PML/RIPPLY3/IL20RB/PNLIP/TLR9/TREM1/CYTL1/POMC/SSH1/MOV10L1/APBB1/IP/ROB4/MXRA8/BNC2/BANP/PPP1CB/HERC6/PPP1CC/PIWIL2/ELP3/SMPD3/CHRNA9/LIMS2/PARVA/PRKAR1B/IFT122/ERMARD/MCTP2/CSGALNACT1/PRKD1/BIN3/MAPK3/MAP2K2/PROC/HTRA1/PSMB4/RGMA/TRPC7/PSMD7/SLURP1/PLEKHG5/TENM2/ERMN/RDH14/METT14/MARK4/PXN/ACTA2/RASGRF2/TRIM27/RGR/RPL29/S100A4/S100A6/BGLAP/SCT/CCL11/CCL17/NPAS3/NOD2/STRA6/SFRP2/CXCR5/TRA2B/GZF1/DNAI2/SGK1/VPS33A/BMP4/SLC8A1/BMPR1B/SLIT1/BOK/SOX9/BPI/STK3/SUPT6H/BST2/TCEA1/ZEB1/ACT1/TEAD3/TGM2/TCHH/TIMP3/TLE3/TLR5/TNFAIP3/TNFRSF1A/TNXP/TRPC4/TRPC6/PHLDA2/TWIST1/CCR2/TNFRSF4/WNT10B/YWHAG/ZAP70/ZNF7/CACNA1E/PTP4A1/CACNB2/PAX8/CXCR4/FZD5/RAB7A/PPDPF/LST1/TMEM204/NLRX1/CALD1/ZC3H12A/RAB11F1P1/C6orf25/COL18A1/CALR/COLQ/CAST/CAPZB/SH3BGL3/SCRT1/HIST1H3A/SPATA16/BFSP2/NROB2/CASQ1/HOPX/PARD6B/TTBK1/TRIM63/KDM2B/LOXL3/CBX2/IFITM1/GAS7/SCIN/RUNX1/TP63/RUNX3/IRS2/ACTN1/FADD/TNFRSF11A/ALDH1A2/SPHK1/STBD1/LIMD1/PIAS2/LDB2/ESAM/SLC16A3/CBFA2T2/RSAD2/AURKB/RCS1/CD8A/ADIPOQ/H2AFY/MTL5/ARHGEF10/MICAL2/RAPGEF2/ULK2/CD79A/FGF19 | 419 |
| GO:0048518 | positive regulation of biological process | 347/901 | 4960/17046 | 2.79E-10 | 1.11E-07 | 8.73E-08 | ABI1/CDH3/TANK/TSPAN5/CDH13/FARP1/CDKN1C/TCIRG1/TRDN/SPON2/PITRM1/PDPN/DMRT2/CELF1/TBR1/HCS2/ADCY3/RER1/ESM1/CHGA/CHI3L1/ERLIN2/PSIP1/EGLN2/CIDEA/CCR1/SLC51B/SEZ6/MAP3K8/ADM/IL13RA/EGFLAM/CP51/MIB2/MPP7/CTGF/SMYD1/SH3D19/CYLD/ADRB3/FITM1/TRPV3/CITED4/DBB1/RNF168/BHLHA15/COCH/NLRP6/DIO3/DMBT1/DNMT3A/ABAT/DRD4/ECE1/EEF2/EGFR/EGR3/EIF4G1/A2M/UNC13D/EPHA1/EPHA3/ESR1/F11/SPATA13/FCGR2A/FGA/FGF10/RASA3/PPM1E/SBNO2/ACIN1/FOX2/TBC1D9B/FOXO1/EXPH5/AKR1B1/GGA3/FLOT2/MCL1/TBC1D1/NEDD4/PSD3/LARP1/PUM2/ARHGEF18/MAPK8IP2/VGLL2/MTOR/RASGEF1C/RNF144B/ALS2CL/TENM4/RGS22/GAPDH/PABPC1/DNAJC2/FGF22/NPTN/CYTH4/GLS2/VPS4A/BMP10/GNAS/GPR26/GPER1/DOK7/FFAR2/GRB10/DNAJC15/GSTP1/BRF1/GUCY1A3/GZMA/ANXA2/SOX8/NRG1/HK1/HLA-B/HLA-DPA1/ANXA13/HLA-E/HLX/HMGA1/NR4A1/ACACB/HPCA/HOXD3/AGFG2/HRH1/HSPA1L/HSP90AA1/HSP90AB1/TFAP2E/ID3/RSPO2/FMN1/BARHL2/IGF1/IGF2/CYR61/IL1RN/IL6/IL12RB2/IL16/FOXK2/INHBA/IRF1/ISL1/ITGB2/JUP/KCNH2/KDR/IPO5/AMIGO3/HES5/STMN1/LCK/LCP1/LDLR/ARHGDA/LGALS9/LHCGR/LLGL1/LMNA/LMO2/LTB/SMAD3/MC2R/MEF2D/MAP3K1/MEOX1/MEOX2/MF2/MFNG/MITF/PLEKHG7/NEU1/NFATC3/NFYB/NHLH2/NOV/NPPC/NRAS/NTF3/OPRL1/P2RY6/PALM/ARHGEF3/PARK2/UTP11L/LEF1/ANGPT4/SIRT6/ATP8A2/PIK3CG/PITX2/PKHD1/PLA2G2A/PLAGL1/PML/IL20RB/PNLIP/RIPK4/TLR9/CYTL1/POMC/PON1/RIN2/ZDHC13/APBB1IP/BANP/PIWIL2/ELP3/ARHGEF10/GOLPH3/FANCI/SMPD3/LIMS2/PRKAR1B/PAG1/PRKD1/MAPK3/MAP2K2/MRAP/MASP1/HTRA1/PSMB4/PAK6/ARNTL2/RGMA/PSMD7/ACTR3B/PTGFR/PLEKHG5/TENM2/MARK4/CCAR2/PXN/ACTA2/RASGRF2/TRIM27/RGS12/S100A4/S100A6/SCT/CCL17/NPAS3/NOD2/STRA6/SFRP2/CXCR5/ARHGAP9/TRA2B/SGK1/BMP4/ZNF649/SLC8A1/BMPR1B/BOK/SOX9/STK3/STK10/SUPT6H/BST2/VAMP2/TBP/TCEA1/TCEB2/ZEB1/ACT1/TEAD3/TERF1/TGM2/TLR5/TNFAIP3/TNFRSF1A/TRAFF1/TRAFF5/TRPC6/TWIST1/CCR2/TNFRSF4/WNT10B/YWHAG/ZAP70/CA7/PTP4A1/CACNB2/PAX8/CXCR4/FZD5/RAB7A/CARD14/BCL2L14/NLRX1/CSPP1/ZC3H12A/COL18A1/CALR/UNC93B1/SH3BGL3/SLA2/NROB2/HOPX/MGARP/IFITM1/SCIN/CDK10/RUNX1/TP63/RUNX3/IRS2/CRADD/FADD/TNFRSF11A/ALDH1A2/SPHK1/SKAP2/LIMD1/PRC1/STAR13/PIAS2/ZFAND2A/MAP3K6/SYT7/LDB2/CBFA2T2/RSAD2/AURKB/CD8A/ADIPOQ/ARHGAP29/LY86/RAB3D/H2AFY/ARHGEF10/MICAL2/RAPGEF2/USP6NL/CD79A/RABGAP1L/IQSEC1/FGF19/NR1H4                                                                                                                                                                                                                                                                                                                                                                                                                                         | 347 |
| GO:0048731 | system development                        | 292/901 | 4014/17046 | 3.05E-10 | 1.14E-07 | 8.94E-08 | ABI1/CDH3/CDH13/FARP1/CDKN1C/SPEG/SPON2/ZBTB18/TACC2/PDPN/DMRT2/TBR1/GJB6/TMED10/LECT1/ESM1/CHI3L1/CHRNA1/GPRIN1/CLN5/CCR1/SLC38A10/SEZ6/CNP/CO9A3/COL11A1/COMP/SCLT1/ZFP42/ADM/IL13RA/CP51/ZNF358/FAM101A/APCDD1/CSTA/CTGF/SMYD1/CYLD/ESCO2/CYP11A1/RNF168/DLG2/DNMT3A/DRD4/ECE1/EEF2/EFNA2/EGFR/EGR3/EIF4G1/EML1/EPHA1/EPHA3/EPHB4/ESR1/FGA/FGF10/RASA3/VASH1/BTBD3/SBNO2/ACIN1/FOXL1/FOX2/FOXO1/EXPH5/AKR1B1/SPG20/NFASC/EPB41L3/FLNB/NEDD4/PSD3/MAPK8IP2/VGLL2/MTOR/DFNB31/TENM4/LCE2B/GATM/FGF22/NPTN/GJB2/SDCBP2/DK3/BMP10/GNAS/GPER1/FLVCR1/GSTP1/NME7/ANXA2/SOX8/KCNIP2/NRG1/HLA-B/HLA-DOA/HLX/NR4A1/ACACB/HPCA/APBA2/HOXB3/HOXC4/HOXC5/HOXC6/HOXC7/HRH1/HSD11B1/HSD17B2/HSP90AA1/HSP90AB1/HTR5A/ID3/RSPO2/FMN1/BARHL2/IGF1/IGF2/CYR61/LCE1C/LCE1D/LCE2D/IL6/AQP2/AQP5/INHBA/IRF1/ISL1/ITGA7/IVL/JUP/KCNH2/KDR/ACAT1/AMIGO3/INSC/HES5/SLC6A17/STMN1/LCK/ARHGDA/LGALS9/LHCGR/LLGL1/LMNA/LMO2/LOX/LTB/SMAD3/MC2R/MEF2D/MAP3K1/MEOX1/MEOX2/MITF/LHX8/MYL2/NEU1/NFATC3/NHLH2/NOV/NPPC/NRAS/NTF3/ATP5B/PALM/PARK2/UTP11L/LEF1/CEND1/ANGPT4/C11orf73/SIRT6/PDE6B/ATP8A2/PIK3CG/PITX2/PKHD1/PKM/PLAGL1/PML/RIPPLY3/CYTL1/SSH1/ROB4/MXRA8/BNC2/HERC6/PPP1CC/ELP3/SMPD3/CHRNA9/LIMS2/PARVA/IFT122/CSGALNACT1/PRKD1/BIN3/MAPK3/MAP2K2/HTRA1/PSMB4/RGMA/TRPC7/PSMD7/TENM2/MARK4/ACTA2/RASGRF2/S100A4/S100A6/BGLAP/SCT/CCL11/STRA6/SFRP2/CXCR5/TRA2B/GZF1/SGK1/VPS33A/BMP4/SLC8A1/BMPR1B/SLIT1/BOK/SOX9/STK3/SUPT6H/TCEA1/ZEB1/ACT1/TGM2/TCHH/TIMP3/TLE3/TLR5/TNFAIP3/TRPC4/TRPC6/PHLDA2/TWIST1/CCR2/WNT10B/YWHAG/ZAP70/CACNB2/PAX8/CXCR4/FZD5/PPDPF/LST1/TMEM204/ZC3H12A/C6orf25/COL18A1/CALR/COLQ/CAST/SCRT1/BFSP2/NROB2/CASQ1/HOPX/PARD6B/TTBK1/KDM2B/LOXL3/GAS7/SCIN/RUNX1/TP63/RUNX3/IRS2/ACTN1/FADD/TNFRSF11A/ALDH1A2/SPHK1/LDB2/CBFA2T2/RSAD2/CD8A/ADIPOQ/H2AFY/ARHGEF10/MICAL2/RAPGEF2/ULK2/CD79A/FGF19                                                                                                                                                                                                                                                                                                                                                                                                                                                                                                                                                                                                                                                                                                                                                                                                | 292 |

|            |                                           |         |            |          |          |          |                                                                                                                                                                                                                                                                                                                                                                                                                                                                                                                                                                                                                                                                                                                                                                                                                                                                                                                                                                                                                                                                                                                                                                                                                                                                                                                                                                                                                                                                                                                                                                                                                                                                                          |     |
|------------|-------------------------------------------|---------|------------|----------|----------|----------|------------------------------------------------------------------------------------------------------------------------------------------------------------------------------------------------------------------------------------------------------------------------------------------------------------------------------------------------------------------------------------------------------------------------------------------------------------------------------------------------------------------------------------------------------------------------------------------------------------------------------------------------------------------------------------------------------------------------------------------------------------------------------------------------------------------------------------------------------------------------------------------------------------------------------------------------------------------------------------------------------------------------------------------------------------------------------------------------------------------------------------------------------------------------------------------------------------------------------------------------------------------------------------------------------------------------------------------------------------------------------------------------------------------------------------------------------------------------------------------------------------------------------------------------------------------------------------------------------------------------------------------------------------------------------------------|-----|
| GO:0009653 | anatomical structure morphogenesis        | 205/901 | 2579/17046 | 3.27E-10 | 1.15E-07 | 9.01E-08 | ABI1/CDH13/FARP1/CDKN1C/SPON2/PDPN/DMRT2/TBR1/GJB6/LECT1/ESM1/CHI3L1/FRMD6/CNP/COL9A3/COL11A1/COMP/SCLT1/ADM/CPM/ZNF358/FAM101A/CTGF/SH3D19/CYLD/COCH/ECE1/EFNA2/EGFR/EGR3/TMEM17/UNC13D/EPHA1/EPHA3/EPHB4/ESR1/SP8/FGA/FGF10/RASA3/VASH1/BTBD3/SBNO2/FOXO1/FOXC2/FOXO1/SPG20/NFASC/EPB4L3/FLNB/NEDD4L/ARHGGEF18/MAPK8IP2/TENM4/GAS2/FGF22/DKK3/BMP10/GNAS/FLVCR1/TMOD4/ANXA2/SOX8/NRG1/HLX/NR4A1/HOXB3/HOXC4/HOXD3/HSP90AA1/HSP90A1/ID3/RSPO2/FMN1/BARHL2/IGF1/IGF2/CYR61/IL1RN/IL6/FOXK2/AQP5/INHBA/ISL1/ITGA7/ITGB2/ITGB7/KDR/HES5/AFF3/LAMA3/STMN1/ARHGDLA/LLGL1/SMAD3/MEF2D/MA/P3K1/MEOX1/MEOX2/MF12/LHX8/MYL2/NFATC3/NOV/NPPC/NRAS/NTF3/ATP5B/PALM/PARK2/LEF1/CEND1/ANGPT4/SIRT6/ATP8A2/PIK3CG/PITX2/PKH1/PML/RIPK4/SSH1/ROBO4/FBLIM1/BNC2/PALMD/CHRNA9/LIMS2/PARVA/IFT122/CSGALNACT1/PRKD1/BIN3/MAPK3/MAP2K2/HTRA1/CDC42SE1/PSMB4/RGMA/TRPC7/PSMD7/TENM2/ERMN/PXN/AC/TA2/RASGRF2/S100A4/S100A6/BGLAP/CCL11/STRA6/SFRP2/GZF1/DNAI2/SGK1/TMEM237/VPS33A/BMP4/SLC8A1/BMPR1B/SLIT1/SOX9/STK3/ZEB1/ACTC1/TGM2/TLE3/TNFAIP3/TRPC4/TRPC6/PHLDA2/TWIST1/CCR2/WNT10B/CACNB2/PAX8/FZD5/LST1/ZC3H12A/C6orf25/COL18A1/CALR/SLIRP/CAST/CAPZB/ANTXR1/CASQ1/HOPX/PARD6B/TTBK1/KDM2B/LOXL3/GAS7/RUNX1/TP63/RUNX3/IRS2/ACTN1/ALDH1A2/SPHK1/LIMD1/ADIPOQ/MICAL2/RAPGEF2/ULK2/FGF19                                                                                                                                                                                                                                                                                                                                                                                                                  | 205 |
| GO:0006928 | movement of cell or subcellular component | 152/901 | 1789/17046 | 1.37E-09 | 4.55E-07 | 3.58E-07 | ABI1/CDH13/SPON2/PDPN/TBR1/ADCY3/CHGA/KIF12/AP3S1/FRMD6/CCR1/COL9A3/APCDD1/KLC3/CTGF/DNAH6/DNAH8/EFNA2/EGFR/EGR3/DNAH12/EPHA1/EPHA3/EPHB4/FAT2/SPATA13/PHACTR1/FGF10/RASA3/VASH1/FOXC2/NFASC/GAPDH5/FGF22/BMP10/GPER1/FFAR2/NME7/HAS1/SOX8/NRG1/NR4A1/HRH1/HSP90AA1/HSP90AB1/BARHL2/IGF1/CYR61/IL1RN/IL6/IL16/ISL1/ITGA7/ITGB2/ITGB7/JUP/KDR/KIF25/LAMA3/STMN1/LCK/LCP1/ARHGDLA/LGALS9/LMNA/SMAD3/MCC/MAP3K1/MYH4/MYL2/ATP1A2/NOV/NRAS/NTRF3/P2RY6/ATP5B/PALM/LEF1/CEND1/ANGPT4/PIK3CG/PITX2/PKH1/SPA17/PML/TREM1/ROBO4/ELP3/PARVA/IFT122/PRKD1/BIN3/MAPK3/MAP2K2/PROC/PSMB4/PAK6/RGMA/TRPC7/PSMD7/PLEKHG5/TENM2/FAM60A/RASGRF2/CCL11/CCL17/NOD2/SFRP2/CXCR5/DNAI2/SGK1/BMP4/SLC8A1/BMPR1B/SLIT1/SOX9/STK10/BST2/ACTC1/TRPC4/TRPC6/PHLDA2/TWIST1/CCR2/ZAP70/CACNA1E/PTP4A1/CACNB2/CXCR4/CALD1/COL18A1/CALR/SLIRP/CAPZB/SH3BGLR3/SCRT1/DYNLRB2/PARD6B/MGARP/IFITM1/RUNX3/IRS2/ACTN1/FA/AD/TNFRSF11A/SPHK1/LIMD1/ESAM/SLC16A3/ADIPOQ/RAPGEF2/FGF19                                                                                                                                                                                                                                                                                                                                                                                                                                                                                                                                                                                                                                                                                                                                         | 152 |
| GO:0048869 | cellular developmental process            | 271/901 | 3716/17046 | 1.54E-09 | 4.84E-07 | 3.81E-07 | ABI1/CDH3/FARP1/CDKN1C/SPEG/SPON2/ZBTB18/TACC2/PDPN/CELF1/TBR1/LECT1/GPRIN1/CLN5/FRMD6/CCR1/SEZ6/CNP/COL9A3/COL11A1/SCLT1/ZFP42/ADM/IL31RA/CP51/FAM101A/APCDD1/CSTA/CTGF/SMYD1/SH3D19/CYLD/ADRB3/ESCO2/CYP11A1/BHLHA15/COCH/DMBT1/DNMT3A/EEF2/EFNA2/EGFR/EGR3/EIF4G1/A2M/ELK4/TMEM17/EML1/UNC13D/EPHA1/EPHA3/EPHB4/ESR1/FGA/FGF10/RASA3/BTBD3/SBNO2/ACIN1/FOXO1/FOXC2/FOXO1/EXPH5/SPG20/NFASC/EPB4L3/FLNB/FLOT2/NEDD4L/SYNE1/PSD3/ARHGGEF18/MAPK8IP2/TSSK2/MTOR/DFNB31/TENM4/GAS2/LCE2B/GAPDH5/FGF22/NPTN/BMP10/GNAS/GPER1/FFAR2/FLVCR1/TMOD4/ANXA2/SOX8/KCNIP2/SLIT1/HLA-B/HLA-DOA/ANXA13/HLX/NR4A1/HOXB3/HOXD3/HSP90AA1/HSP90AB1/ID3/RSPO2/FMN1/BARHL2/IGF1/IGF2/CYR61/LCE1C/LCE1D/LCE2D/IL6/FOXK2/INHBA/IRF1/ISL1/ITGA7/ITGB2/ITGB7/IVL/JUP/HLS1/KDR/INSC/HES5/LAMA3/STMN1/LCK/ARHGDLA/LGALS9/LGL1/LMNA/SMAD3/MEF2D/MAP3K1/MEOX1/MF12/MITF/LHX8/MYL2/NEU1/NFATC3/NHLH2/NOV/NPPC/NRAS/NTF3/ATP5B/PALM/PARK2/LEF1/CEND1/SIRT6/ATP8A2/PITX2/PKH1/PLA2G2A/PLAGL1/PML/CYTL1/SSH1/MOV10L1/ROBO4/MXRA8/FBLIM1/PALMD/HERC6/PPP1C/CPIWIL2/ELP3/SMPD3/PARVA/IFT122/PRKD1/BIN3/MAPK3/MAP2K2/MRPA/HTRA1/CDC42SE1/PSMB4/RGMA/TRPC7/PSMD7/TENM2/ERMN/RDH14/PXN/ACT2/RASGRF2/S100A4/S100A6/BGLAP/CCL11/CCL17/SFRP2/DNAI2/SGK1/TMEM237/VPS33A/BMP4/SLC8A1/BMPR1B/SLIT1/BOK/SOX9/STK3/SUPT6H/TAF4B/TCEA1/ZEB1/ACTC1/TEAD3/TCHH/TNFRSF1A/TRPC4/TRPC6/TWIST1/UCP1/WNT10B/YWHAG/ZAP70/CACNB2/PAX8/CXCR4/FZD5/PPDPF/LST1/TMEM204/ZC3H12A/C6orf25/COL18A1/CALR/SLIRP/CAST/CAPZB/SCRT1/SPATA16/ANTXR1/BFSP2/CASQ1/HOPX/PARD6B/TTBK1/LOXL3/CBX2/IFITM1/GAS7/SCIN/RUNX1/TP63/RUNX3/IRS2/ACTN1/FADD/TNFRSF11A/ALDH1A2/LIMD1/PIAS2/CBFA2T2/RSAD2/DAPL1/CD8A/ADIPOQ/H2AFY/MTLS/ARHGGEF10/RAPGEF2/ULK2/CD79A/FGF19 | 271 |
| GO:0048513 | organ development                         | 218/901 | 2848/17046 | 2.23E-09 | 6.63E-07 | 5.21E-07 | ABI1/CDH3/CDKN1C/SPEG/ZBTB18/TACC2/PDPN/TBR1/GJB6/TMED10/LECT1/CHI3L1/CHRNA1/CLN5/CCR1/SLC38A10/SEZ6/CNP/COL9A3/COL11A1/COMP/ZFP42/ADM/IL31RA/CPS1/FAM101A/APCDD1/CSTA/CTGF/SMYD1/CYLD/ESCO2/CYP11A1/DRD4/ECE1/EEF2/EFNA2/EGFR/EGR3/EML1/EPHA3/EPHB4/ESR1/FGA/FGF10/BTBD3/SBNO2/ACIN1/FOXO1/FOXO2/FOXO1/EXPH5/AKR1B1/SPG20/FLNB/VGLL2/MTOR/DFNB31/TENM4/LCE2B/GATM/GJB2/DKK3/BMP10/GNAS/FLVCR1/NME7/ANXA2/SOX8/NRG1/HLA-B/HLA-DXA/HLX/ACACB/HPCA/HOXB3/HOXC4/HOXD3/HSD11B1/HSD17B2/HSP90AB1/HTR5A/ID3/RSPO2/FMN1/BARHL2/IGF1/IGF2/CYR61/LCE1C/LCE1D/LCE2D/IL6/AQP2/AQP5/INHBA/IRF1/ISL1/ITGA7/IVL/JUP/KCNJ8/KDR/ACAT1/AMIGO3/INSC/HES5/SLC6A17/STMN1/LCK/LGALS9/LHCGR/LMNA/LMO2/LOX/LTB/SMAD3/MC2R/MEF2D/MAP3K1/MEOX1/MEOX2/MITF/LHX8/MYL2/NFATC3/NOV/NPPC/NRAS/NTF3/LEF1/CEND1/C11orf73/SIRT6/PDE6B/ATP8A2/PITX2/PKH1/PKM/PLAGL1/PML/RIPPLY3/CYTL1/BNC2/HERC6/SMPD3/CHRNA9/LIMS2/PARVA/IFT122/CSGALNACT1/BIN3/MAPK3/MAP2K2/HTRA1/ACTA2/S100A4/BGLAP/SCT/CCL11/STRA6/SFRP2/CXCR5/TRA2B/GZF1/VPS33A/BMP4/SLC8A1/BMPR1B/SLIT1/BOK/SOX9/STK3/TCEA1/ZEB1/ACTC1/TGM2/TCHH/TLE3/TLR5/TNFAIP3/PHLDA2/TWIST1/WNT10B/ZAP70/PAX8/FZD5/PPDPF/C6orf25/COL18A1/CALR/CAST/BFSP2/CA/SQ1/HOPX/TTBK1/KDM2B/LOXL3/SCIN/RUNX1/TP63/RUNX3/IRS2/ACTN1/FADD/TNFRSF11A/ALDH1A2/SPHK1/LDB2/RSAD2/CD8A/ADIPOQ/H2AFY/MICAL2/RAPGEF2/CD79A/FGF19                                                                                                                                                                                                                                                                                                                                                                    | 218 |
| GO:0010033 | response to organic substance             | 207/901 | 2687/17046 | 3.90E-09 | 1.04E-06 | 8.19E-07 | CDH13/CDKN1C/TCIRG1/SPON2/GJB6/NPFFR2/ADCY3/TMED10/LECT1/CHI3L1/ERLIN2/CHRNA1/CHRNA2/CHRNA5/CIDEA/AP3S1/CCR1/CNP/ADM/IL31RA/CP51/CTGF/CYP11A1/CIT/ED4/DDOST/ZNF366/BHLHA15/DNMT3A/ABAT/DRD4/AGXT/EGFR/EGR3/EIF4G1/EPHA3/ESR1/FGA/FGF10/RASA3/SBNO2/FOXO2/FOXO1/AKR1B1/SPG20/FLNB/MCL1/NUP210/NEDD4L/ARHGGEF18/MTOR/STEAP2/FBXO2/GATM/FGF22/NPTN/GJB2/BMP10/GNAS/GPER1/FFAR2/GRB10/GSTP1/GUCY1A3/HAS1/NRG1/HLA-B/HLA-DPA1/HLA-E/HLA-F/NR4A1/HPCA/HRH1/HSD17B2/HSPA11/HSP90AA1/HSP90AB1/HTR3A/HTR5A/IGF2/CYR61/IL1R1/IL1RN/IL6/IL10RA/IL11RA/IL12RB2/IL15RA/INHBA/IRF1/AQP9/ISL1/ITIH4/JUP/KCNJ8/KDR/ACAT1/IPO5/HES5/AFF3/LCK/ARHGDLA/LGALS9/LHCGR/LMNA/LMO2/LOX/LTB/LTP1/SMAD3/ME1/MAP3K1/MOV10/ATP1A2/NPPC/NRAS/OAS2/OPR1/P2RY6/IL21R1/ARHGGEF3/PARK2/LEF1/PIK3CG/PITX2/PKM/PRKAG3/PML/IL20RB/TLR9/SSH1/PON1/PPP1CB/PPP1CC/CHRNA9/SYBU/PRKAR1B/LMBRD1/PRKD1/MAPK3/MAP2K2/HTRA1/PSMB4/RGMA/PSMD7/PTGFR/PLEKHG5/PTPRE/PXN/RASGRF2/RIT2/BGLAP/CCL11/CCL17/NOD2/SFRP2/CXCR5/BMP4/SLC8A1/SLC9A3/BMPR1B/SOX9/STAT2/BST2/VAMP2/ZEB1/ACTC1/TIMP3/TLR5/TNFAIP3/TNFRSF1A/TWIST1/CCR2/TNFRSF4/WNT10B/CACNA1E/PAX8/CXCR4/FZD5/RAB7A/CARD14/TMEM204/ZC3H12A/CPEB4/CALR/NR0B2/CASQ1/IL1F10/TRIM63/MGARP/RAE1/IFITM1/RUNX1/RUNX3/IRS2/FADD/TNFRSF11A/ALDH1A2/SPHK1/HSPB3/CCR2/RSAD2/ADIPOQ/LY86/NUP93/RAPGEF2/FGF19/NR1H4                                                                                                                                                                                                                                                                                                                                                                               | 207 |

|            |                               |         |            |          |          |          |                                                                                                                                                                                                                                                                                                                                                                                                                                                                                                                                                                                                                                                                                                                                                                                                                                                                                                                                                                                                                                                                                                                                                                                                                                                                                                                                                                                                                                                                                                                                                                                                                                                                                                                                                                                                                                                                                                                                                                                                                                                                                                                                                                                                                                                                                                                                                                                                                                                                                      |     |
|------------|-------------------------------|---------|------------|----------|----------|----------|--------------------------------------------------------------------------------------------------------------------------------------------------------------------------------------------------------------------------------------------------------------------------------------------------------------------------------------------------------------------------------------------------------------------------------------------------------------------------------------------------------------------------------------------------------------------------------------------------------------------------------------------------------------------------------------------------------------------------------------------------------------------------------------------------------------------------------------------------------------------------------------------------------------------------------------------------------------------------------------------------------------------------------------------------------------------------------------------------------------------------------------------------------------------------------------------------------------------------------------------------------------------------------------------------------------------------------------------------------------------------------------------------------------------------------------------------------------------------------------------------------------------------------------------------------------------------------------------------------------------------------------------------------------------------------------------------------------------------------------------------------------------------------------------------------------------------------------------------------------------------------------------------------------------------------------------------------------------------------------------------------------------------------------------------------------------------------------------------------------------------------------------------------------------------------------------------------------------------------------------------------------------------------------------------------------------------------------------------------------------------------------------------------------------------------------------------------------------------------------|-----|
| GO:0007154 | cell communication            | 390/901 | 5832/17046 | 4.00E-09 | 1.04E-06 | 8.19E-07 | AKT3/ABI1/CDH3/TANK/TSPAN5/CDH13/FARP1/KLRG1/RCAN2/KCNMB2/CDKN1C/TCIRG1/MRVI1/TRDN/PDPN/GJB6/HCST/NPFFR2/ADCY3/LECT1/ESM1/CHI3L1/ERLN2/EGLN2/PTH2/PDAP1/CHRNA1/CHRNA2/CHRNA5/SORCS1/CIDEA/PANX3/AP3S1/CCR1/SEZ6/TNFAP8L1/CNP/MAP3K8/ADM/IL131RA/OR2A14/CRABP1/MIB2/MPP7/APCDD1/CTGF/SGOL1/PML1/CYLD/ADR83/DBB1/ZNF366/BHLHA15/NLRP6/DLG2/DMBT1/ABAT/DRD4/DTNA/AGXT/EFNA2/EGFR/EGR3/EIF4G1/A2M/TMEM17/EPHA1/EPHA3/EPHB4/ESR1/SPATA13/FCGR2A/FGA/FGF10/FHIT/RASA3/ACIN1/FOXL1/FOXC2/FOXO1/AKR1B1/SPG20/NFASC/FLNB/RHOBTB2/NUP210/NEDD4L/PSD3/LARP1/PPP1R13B/PUM2/ARHGFE18/MAPK8IP2/TSSK2/MTOR/SLC37A4/GABBR1/RASGEF1C/ALS2CL/PNKD/TENM4/ACOT11/RGS22/PLEK2/ADGRF1/RPS6K1/GJA3/FGF22/NPTN/GJB2/SDCBP2/PDE7B/DKK3/CYTH4/GLS2/GPR162/BMP10/GNAS/GPR26/GPER1/FFAR2/GRB10/GRIK4/DNAJC15/GSTP1/GUCY1A3/NME7/GPR132/ANXA2/SOX8/KCNIP2/NRG1/ANXA6/HK1/HLA-B/HLA-DOA/HLA-DPA1/HLA-E/HLA-F/NR4A1/HPCA/APBA2/HOXB3/HRH1/HSP90AA1/HSP90AB1/HTR3A/HTR5A/RSP20/IGF1/IGF2/CYR61/GPR142/IL1R1/IL1RN/IL6/IL10RA/AQP2/IL11RA/IL12RB2/IL15RA/INHBA/IRF1/ISL1/ITGA7/ITGB2/ITGB7/JUP/CD82/KCNH2/KCNJ8/KCNJ9/KCNMB1/KDR/KRT15/HES5/STMN1/OR2A5/LCK/LCP1/LDLR/ARHGDA/ILGALS9/LHCGR/LLGL1/LMNA/RAB19/LTB/LTBP1/SMAD3/MC2R/MCC/MAP3K1/MFNG/SCGB2A1/MITF/ASGR1/MOV10/MPZ/PLEKHG7/NUDT1/NEDD9/ATP1A2/NFATC3/NMBR/NOV/NPPC/NRAS/NTF3/OAS2/OPRL1/OR2C1/OR3A2/P2RY6/IL21R/PALM/ARHGFE3/PARK2/SPOCK3/LEF1/DDX47/ANGPT4/PDE4C/PDE7A/PDE6B/PGAM2/PIK3CG/PITX2/PKHD1/PLA2G2A/PRKAG3/PML/GPR84/IL20RB/PNLIP/TLR9/TREM1/CYTL1/POMC/RIN2/ZDHHC13/APBB1P/PPP1CB/PPP1CC/ARHGFE10L/MOB1A/SMPD3/CHRNA9/SYBU/LIMS2/VAC14/PRKAR1B/IFT122/MCTP2/LMBRD1/PAG1/PRKD1/W5/SB2/MAPK3/MAP2K2/PRKRIR/HTRA1/CDC42SE1/PSMB4/PAK6/RGMA/LPAR5/PSMD7/PTGFR/PLEKHG5/TENM2/CCAR2/PTPRE/PXN/RASGRF2/RGR/RGS12/RIT2/S100A4/S100A6/BGLAP/SCT/CCL11/CCL17/NOD2/STRA6/SFRP2/CXCR5/ARHGAP9/SGK1/MICAL1/TMEM237/VPS33A/BMP4/SLC6A12/SLC8A1/BMPR1B/BOK/SOX9/STAT2/STK3/STK10/BST2/VAMP2/ZEB1/TEAD3/TGM2/TLE3/TLR5/TNFAP3/TNFRSF1A/TNXP/TRA1/TRA5/TWIST1/CCR2/TNFRSF4/UPP1/WNT10B/YWHAG/ZAP70/CA7/CACNA1E/CACNB2/PAX8/CXCR4/FZD5/RAB7A/CARD14/BCL2L14/TMEM204/NLRX1/GPR157/RAB11FIP1/CPEB4/C6orf25/CALR/UNC93B1/CAPS/COLQ/HIST1H3A/ANTXR1/SLA2/CMAP/NR0B2/CASQ1/IL1F10/TRIM63/RAE1/IFITM1/CDK10/RUNX1/TP63/RUNX3/IRS2/CRADD/FADD/TNFRSF11A/ALDH1A2/SPHK1/SKAP2/STBD1/LIMD1/TSPAN18/CCR2/PRC1/STARD13/PIAS2/MAP3K6/SYT7/RSAD2/AURKB/DAPL1/CD8A/TRIP10/ADIPOQ/ARHGAP29/LY86/RAB3D/SMAD5-AS1/RAB36/ARHGFE10/NUP93/RAPGEF2/ULK2/CD79A/TELO2/IQSEC1/FGF19/NR1H4 | 390 |
| GO:0009605 | response to external stimulus | 187/901 | 2366/17046 | 4.02E-09 | 1.04E-06 | 8.19E-07 | CDH13/SPON2/TBR1/GJB6/HNRPUL1/CHGA/CHI3L1/CCR1/CNP/COL9A3/COL11A1/ADM/CPS1/ADR83/CYP11A1/BHLHA15/COCH/NLRP6/DMBT1/DNMT3A/EFNA2/EGFR/EGR3/A2M/ANKRD23/UNC13D/EPHA1/EPHA3/EPHB4/F11/FGA/FGF10/RASA3/SBNO2/ACIN1/FOXO1/NFASC/LARP1/PUM2/MTOR/SLC37A4/FBXL21/GATM/FGF22/GPER1/FFAR2/DNAJC15/GSTP1/GUCY1A3/ANXA2/SERPIND1/NRG1/HK1/HLA-B/HLA-E/HMGA1/NR4A1/HRH1/HSP90AA1/HSP90AB1/CYR61/IL1R1/IL1RN/IL6/IL10RA/AQP2/IL12RB2/IL16/IRF1/ISL1/ITGB2/JUP/KCNJ8/KDR/ACAT1/KRT15/STMN1/LCK/LDLR/LGALS9/SMAD3/MAP3K1/ASGR1/NUDT1/ATP1A2/NOV/NRAS/NTF3/OAS2/PARK2/LEF1/SIRT6/PDE6B/ATP8A2/PIK3CG/PITX2/PKM/PLA2G2A/PRKAG3/PML/IL20RB/PNLIP/TLR9/TREM1/POMC/PON1/PPP1CB/PPP1CC/CHRNA9/PARVA/PRKD1/MAPK3/MAP2K2/PROC/MASP1/HTRA1/SLAMF8/PSMB4/ARNTL2/RGMA/TRPC7/PSMD7/PTGFR/PLEKHG5/TENM2/CREBZF/ACTA2/RASGRF2/RGR/DEFB134/BGLAP/CCL11/CCL17/NPAS3/NOD2/STRA6/SFRP2/CXCR5/VPS33A/BMP4/SLC8A1/BMPR1B/SLIT1/SOX9/BPI/STAT2/BST2/TIMP3/TLR5/TNFAP3/TNFRSF1A/TRPC4/TRPC6/CCR2/UPP1/CA7/CACNB2/CXCR4/FZD5/RAB7A/NLRX1/ZC3H12A/CPEB4/CALR/UNC93B1/CAPS/HIST1H3A/HOPX/IFITM1/RUNX3/IRS2/CRADD/FADD/TNFRSF11A/ALDH1A2/STBD1/CCR2/RSAD2/DAPL1/CD8A/ADIPOQ/LY86/NUP93/RAPGEF2/ULK2/FGF19/NR1H4                                                                                                                                                                                                                                                                                                                                                                                                                                                                                                                                                                                                                                                                                                                                                                                                                                                                                                                                                                                                                                                                                                                                                                                                                                                                                                                | 187 |
| GO:0030154 | cell differentiation          | 254/901 | 3469/17046 | 4.61E-09 | 1.13E-06 | 8.88E-07 | ABI1/CDH3/FARP1/CDKN1C/SPEG/SPON2/ZBTB18/TACC2/CELF1/TBR1/LECT1/GPRIN1/CLN5/FRMD6/CCR1/SEZ6/CNP/COL9A3/COL11A1/SCLT1/ZFP42/ADM/IL131RA/CPS1/FAM101A/APCDD1/CSTA/CTGF/SMYD1/CYLD/ADR83/ESCO2/CYP11A1/BHLHA15/DMBT1/DNMT3A/EEF2/EFNA2/EGFR/EGR3/EIF4G1/A2M/ELK4/EML1/UNC13D/EPHA1/EPHA3/EPHB4/ESR1/FGA/FGF10/RASA3/BTBD3/SBNO2/ACIN1/FOXL1/FOXC2/FOXO1/EXPH5/SPG20/NFASC/EPB41L3/FLNB/FLOT2/NEDD4L/SYNE1/PSD3/MAPK8IP2/TSSK2/MTOR/DFNB31/TENM4/LCE2B/GAPDHS/FGF22/NPTN/BMP10/GNAS/GPER1/FFAR2/FLVCR1/TMOD4/ANXA2/SOX8/KCNIP2/NRG1/HLA-B/HLA-DOA/ANXA13/HLX/NR4A1/HOXB3/HOXB3/HSP90AA1/HSP90AB1/ID3/RSP20/FMN1/BARHL2/IGF1/IGF2/CYR61/LCE1D/LCE2D/IL6/FOXK2/INHBA/IRF1/ISL1/ITGA7/ITGB2/ITGB7/IVL/JUP/HILS1/KDR/INSC/HES5/LAMA3/STMN1/LCK/ARHGDA/ILGALS9/LLGL1/LMNA/SMAD3/MEF2D/MAP3K1/MEOX1/MFI2/MITF/LHX8/MYL2/NEU1/NFATC3/NHLH2/NOV/NPPC/NRAS/NTF3/ATP5B/PALM/PARK2/LEF1/CEND1/SIRT6/ATP8A2/PITX2/PLA2G2A/PLAGL1/PML/CYTL1/SSH1/MOV10L1/ROBO4/MXRA8/HERC6/PPP1CC/PIWIL2/ELP3/SMPD3/PARVA/PRKD1/BIN3/MAPK3/MAP2K2/MRAP/HTRA1/PSMB4/RGMA/TRPC7/PSMD7/TENM2/RDH14/PXN/ACTA2/RASGRF2/S100A4/S100A6/BGLAP/CCL17/SFRP2/SGK1/VPS33A/BMP4/SLC8A1/BMPR1B/SLIT1/BOK/SOX9/STK3/SUPT6H/TAFA4/TCEA1/ZEB1/ACTC1/TEAD3/TCHH/TNFRSF1A/TRPC4/TRPC6/TWIST1/UCP1/WNT10B/YWHAG/ZAP70/CACNB2/PAX8/CXCR4/FZD5/PPDPF/LST1/TMEM204/ZC3H12A/C6orf25/COL18A1/CALR/SLIRP/CAST/SCRT1/SPATA16/ANTXR1/BFSP2/CASQ1/HOPX/PARD6B/LOXL3/CBX2/IFITM1/GAS7/SCIN/RUNX1/TP63/RUNX3/IRS2/ACTN1/FADD/TNFRSF11A/ALDH1A2/LIMD1/PIAS2/CBFA2T2/RSAD2/DAPL1/CD8A/ADIPOQ/H2AFY/MTL5/ARHGFE10/RAPGEF2/ULK2/CD79A/FGF19                                                                                                                                                                                                                                                                                                                                                                                                                                                                                                                                                                                                                                                                                                                                                                                                                                                                                                              | 254 |

|            |                                  |         |            |          |          |          |                                                                                                                                                                                                                                                                                                                                                                                                                                                                                                                                                                                                                                                                                                                                                                                                                                                                                                                                                                                                                                                                                                                                                                                                                                                                                                                                                                                                                                                                                                                                                                                                                                                                                                                                                                                                                                                                                                                                                                                                                                                                                                                                                                                                                                                                                                                                                                                                                   |     |
|------------|----------------------------------|---------|------------|----------|----------|----------|-------------------------------------------------------------------------------------------------------------------------------------------------------------------------------------------------------------------------------------------------------------------------------------------------------------------------------------------------------------------------------------------------------------------------------------------------------------------------------------------------------------------------------------------------------------------------------------------------------------------------------------------------------------------------------------------------------------------------------------------------------------------------------------------------------------------------------------------------------------------------------------------------------------------------------------------------------------------------------------------------------------------------------------------------------------------------------------------------------------------------------------------------------------------------------------------------------------------------------------------------------------------------------------------------------------------------------------------------------------------------------------------------------------------------------------------------------------------------------------------------------------------------------------------------------------------------------------------------------------------------------------------------------------------------------------------------------------------------------------------------------------------------------------------------------------------------------------------------------------------------------------------------------------------------------------------------------------------------------------------------------------------------------------------------------------------------------------------------------------------------------------------------------------------------------------------------------------------------------------------------------------------------------------------------------------------------------------------------------------------------------------------------------------------|-----|
| GO:0044700 | single organism signaling        | 378/901 | 5624/17046 | 4.74E-09 | 1.13E-06 | 8.88E-07 | AKT3/ABI1/CDH3/TANK/TSPAN5/CDH13/FARP1/KLRG1/RCAN2/KCNMB2/CDKN1C/TCIRG1/MRVI1/TRDN/PDPN/HCST/NPFFR2/ADCY3/LECT1/ESM1/CHI3L1/ERLIN2/EGLN2/PTH2/PDAP1/CHRNA1/CHRNA2/CHRNA5/SORCS1/CIDEA/PANX3/AP3S1/CCR1/SEZ6/TNFAIP8L1/CNP/MAP3K8/ADM/IL131RA/OR2A14/CRABP1/MI2/MPP7/APCDD1/CTGF/SGOL1/PPM1L/CYLD/ADRB3/DBB1/ZNF366/BHLHA15/NLRP6/DLG2/DMBT1/ABAT/DRD4/DTNA/ECE1/AGXT/EFNA2/EGFR/EGR3/EIF4G1/A2M/TMEM17/EPHA1/EPHA3/EPHB4/ESR1/SPATA13/FCGR2A/FGA/FGF10/FHIT/RASA3/FOXL1/FOXC2/FOXO1/AKR1B1/SPG20/NFASC/FLNB/RHOBTB2/NUP210/NEDD4L/PSD3/LARP1/PPP1R13B/PUM2/ARHGEF18/MAPK8IP2/TSSK2/MTOR/GABBR1/RASGEF1C/ALS2CL/PNKD/TENM4/ACOT11/RGS22/PLEK2/ADGRF1/RPS6K1/GJA3/FGF22/NPTN/GJB2/SDCBP2/PDE7B/DKK3/CYTH4/GLS2/GPR162/BMP10/GNAS/GPR26/GPER1/FFAR2/GRB10/GRIK4/GSTP1/GUCY1A3/NME7/GPR132/ANXA2/SOX8/KCNIP2/NRG1/ANXA6/HLA-B/HLA-DOA/HLA-DPA1/HLA-E/HLA-F/NR4A1/HPCA/APBA2/HOXD3/HRH1/HSP90AA1/HSP90AB1/HTR3A/HTR5A/RSPO2/IGF1/IGF2/CYR61/GPR142/IL1R1/IL1RN/IL6/IL10RA/IL11RA/IL12RB2/IL15RA/INHBA/IRF1/ISL1/ITGA7/ITGB2/ITGB7/JUP/CD82/KCNH2/KCNJ8/KCNJ9/KCNMB1/KDR/HES5/STMN1/OR2A5/LCK/LCP1/LDLR/ARHGDI1/LGALS9/LHCGR/LLGL1/LMNA/RAB19/LTB/LTBP1/SMAD3/MC2R/MCC/MAP3K1/MFNG/SCGB2A1/MITF/MOV10/MP2/PLEKHG7/NEDD9/ATP1A2/NFATC3/NMBR/NOV/NPPC/NRAS/NTF3/OAS2/OPRL1/OR2C1/OR3A2/P2RY6/IL21R/PALM/ARHGEF3/PARK2/SPOCK3/LEF1/DDX47/ANGPT4/PDE4C/PDE7A/PDE6B/PGAM2/PIK3CG/PITX2/PKHD1/PLA2G2A/PRKAG3/PML/GPR84/IL20RB/PNLIP/TLR9/TREM1/CYTL1/POMC/RIN2/ZDHH13/APBB1P/PPP1CB/PPP1CC/ARHGEF10/MOB1A/SMPD3/CHRNA9/SYBU/LIMS2/VAC14/PRKAR1B/IFT122/MCTP2/LMBRD1/PAG1/PRKD1/WSB2/MAPK3/MAP2K2/PRKRI/HTRA1/CDC42SE1/PSMB4/PAK6/RGMA/LPAR5/PSMD7/PTGFR/PLEKHG5/TENM2/CCAR2/PTPRE/PXN/RASGRF2/RGR/RGS12/RIT2/S100A4/S100A6/SCT/CCL11/CCL17/NOD2/STRA6/SFRP2/CXCR5/ARHGAP9/SGK1/MICAL1/TMEM237/BMP4/SLC6A12/SLC8A1/BMP1R1B/BOK/SOX9/STAT2/STK3/STK10/BST2/VAMP2/ZEB1/TEAD3/TGM2/TLE3/TLR5/TNFAIP3/TNFRSF1A/TNXXB/TRAFF1/TRAFF5/TWIST1/CCR2/TNFRSF4/WNT10B/YWHAG/ZAP70/CA7/CACNA1E/CACNB2/PAX8/CXCR4/FZD5/RAB7A/CARD14/BCL2L14/TMEM204/NLRX1/GPR157/RAB11FIP1/CPEB4/C6orf25/CALR/UNC93B1/CAPS/COLQ/HIST1H3A/ANTXR1/SLA2/CMAMP/NR0B2/CASQ1/IL1F10/TRIM63/RAE1/IFITM1/CDK10/RUNX1/TP63/RUNX3/IRS2/CRADD/FADD/TNFRSF11A/ALDH1A2/SPHK1/SKAP2/LIMD1/TSPAN18/CCRL2/PRC1/STARD13/PIAS2/MAP3K6/SYT7/RSAD2/AURKB/DAPL1/CD8A/TRIP10/ADIPOQ/ARHGAP29/LY86/RAB3D/SMAD5-AS1/RAB36/ARHGEF10/NUP93/RAPGEF2/ULK2/CD79A/TELO2/IQSEC1/FGF19/NR1H4 | 378 |
| GO:0023052 | signaling                        | 378/901 | 5629/17046 | 5.32E-09 | 1.22E-06 | 9.59E-07 | AKT3/ABI1/CDH3/TANK/TSPAN5/CDH13/FARP1/KLRG1/RCAN2/KCNMB2/CDKN1C/TCIRG1/MRVI1/TRDN/PDPN/HCST/NPFFR2/ADCY3/LECT1/ESM1/CHI3L1/ERLIN2/EGLN2/PTH2/PDAP1/CHRNA1/CHRNA2/CHRNA5/SORCS1/CIDEA/PANX3/AP3S1/CCR1/SEZ6/TNFAIP8L1/CNP/MAP3K8/ADM/IL131RA/OR2A14/CRABP1/MI2/MPP7/APCDD1/CTGF/SGOL1/PPM1L/CYLD/ADRB3/DBB1/ZNF366/BHLHA15/NLRP6/DLG2/DMBT1/ABAT/DRD4/DTNA/ECE1/AGXT/EFNA2/EGFR/EGR3/EIF4G1/A2M/TMEM17/EPHA1/EPHA3/EPHB4/ESR1/SPATA13/FCGR2A/FGA/FGF10/FHIT/RASA3/FOXL1/FOXC2/FOXO1/AKR1B1/SPG20/NFASC/FLNB/RHOBTB2/NUP210/NEDD4L/PSD3/LARP1/PPP1R13B/PUM2/ARHGEF18/MAPK8IP2/TSSK2/MTOR/GABBR1/RASGEF1C/ALS2CL/PNKD/TENM4/ACOT11/RGS22/PLEK2/ADGRF1/RPS6K1/GJA3/FGF22/NPTN/GJB2/SDCBP2/PDE7B/DKK3/CYTH4/GLS2/GPR162/BMP10/GNAS/GPR26/GPER1/FFAR2/GRB10/GRIK4/GSTP1/GUCY1A3/NME7/GPR132/ANXA2/SOX8/KCNIP2/NRG1/ANXA6/HLA-B/HLA-DOA/HLA-DPA1/HLA-E/HLA-F/NR4A1/HPCA/APBA2/HOXD3/HRH1/HSP90AA1/HSP90AB1/HTR3A/HTR5A/RSPO2/IGF1/IGF2/CYR61/GPR142/IL1R1/IL1RN/IL6/IL10RA/IL11RA/IL12RB2/IL15RA/INHBA/IRF1/ISL1/ITGA7/ITGB2/ITGB7/JUP/CD82/KCNH2/KCNJ8/KCNJ9/KCNMB1/KDR/HES5/STMN1/OR2A5/LCK/LCP1/LDLR/ARHGDI1/LGALS9/LHCGR/LLGL1/LMNA/RAB19/LTB/LTBP1/SMAD3/MC2R/MCC/MAP3K1/MFNG/SCGB2A1/MITF/MOV10/MP2/PLEKHG7/NEDD9/ATP1A2/NFATC3/NMBR/NOV/NPPC/NRAS/NTF3/OAS2/OPRL1/OR2C1/OR3A2/P2RY6/IL21R/PALM/ARHGEF3/PARK2/SPOCK3/LEF1/DDX47/ANGPT4/PDE4C/PDE7A/PDE6B/PGAM2/PIK3CG/PITX2/PKHD1/PLA2G2A/PRKAG3/PML/GPR84/IL20RB/PNLIP/TLR9/TREM1/CYTL1/POMC/RIN2/ZDHH13/APBB1P/PPP1CB/PPP1CC/ARHGEF10/MOB1A/SMPD3/CHRNA9/SYBU/LIMS2/VAC14/PRKAR1B/IFT122/MCTP2/LMBRD1/PAG1/PRKD1/WSB2/MAPK3/MAP2K2/PRKRI/HTRA1/CDC42SE1/PSMB4/PAK6/RGMA/LPAR5/PSMD7/PTGFR/PLEKHG5/TENM2/CCAR2/PTPRE/PXN/RASGRF2/RGR/RGS12/RIT2/S100A4/S100A6/SCT/CCL11/CCL17/NOD2/STRA6/SFRP2/CXCR5/ARHGAP9/SGK1/MICAL1/TMEM237/BMP4/SLC6A12/SLC8A1/BMP1R1B/BOK/SOX9/STAT2/STK3/STK10/BST2/VAMP2/ZEB1/TEAD3/TGM2/TLE3/TLR5/TNFAIP3/TNFRSF1A/TNXXB/TRAFF1/TRAFF5/TWIST1/CCR2/TNFRSF4/WNT10B/YWHAG/ZAP70/CA7/CACNA1E/CACNB2/PAX8/CXCR4/FZD5/RAB7A/CARD14/BCL2L14/TMEM204/NLRX1/GPR157/RAB11FIP1/CPEB4/C6orf25/CALR/UNC93B1/CAPS/COLQ/HIST1H3A/ANTXR1/SLA2/CMAMP/NR0B2/CASQ1/IL1F10/TRIM63/RAE1/IFITM1/CDK10/RUNX1/TP63/RUNX3/IRS2/CRADD/FADD/TNFRSF11A/ALDH1A2/SPHK1/SKAP2/LIMD1/TSPAN18/CCRL2/PRC1/STARD13/PIAS2/MAP3K6/SYT7/RSAD2/AURKB/DAPL1/CD8A/TRIP10/ADIPOQ/ARHGAP29/LY86/RAB3D/SMAD5-AS1/RAB36/ARHGEF10/NUP93/RAPGEF2/ULK2/CD79A/TELO2/IQSEC1/FGF19/NR1H4 | 378 |
| GO:0061448 | connective tissue development    | 35/901  | 224/17046  | 7.76E-09 | 1.71E-06 | 1.35E-06 | LECT1/CHI3L1/COL11A1/COMP/FAM101A/CTGF/FOXC2/SPG20/BMP10/GNAS/SOX8/HOXB3/HOXC4/HOXD3/RSPO2/IGF1/CYR61/ACAT1/HES5/SMAD3/MEF2D/NOV/NPPC/CYTL1/CSGALNACT1/MAPK3/ACTA2/SFRP2/BMP4/BMP1R1B/SOX9/ZEB1/WNT10B/SCIN/RUNX3                                                                                                                                                                                                                                                                                                                                                                                                                                                                                                                                                                                                                                                                                                                                                                                                                                                                                                                                                                                                                                                                                                                                                                                                                                                                                                                                                                                                                                                                                                                                                                                                                                                                                                                                                                                                                                                                                                                                                                                                                                                                                                                                                                                                 | 35  |
| GO:0065008 | regulation of biological quality | 236/901 | 3225/17046 | 2.26E-08 | 4.80E-06 | 3.77E-06 | CDH3/KCNMB2/TCIRG1/MRVI1/TRDN/ZBTB18/PDPN/GJB6/ADCY3/CHGA/EGLN2/CHRNA1/CHRNA2/CHRNA5/CIDEA/CLN5/CCR1/SLC51B/C15orf27/ZG16B/SEZ6/CNP/ADM/IL131RA/CPS1/CRABP1/CTGF/ADRB3/CYP11A1/FITM1/DBB1/BHLHA15/COCH/NLRP6/DIO3/ABAT/DRD4/ECE1/A2M/ESR1/F11/FGA/FGF10/ACIN1/FOXC2/FOXO1/AKR1B1/SPG20/EPB41L3/FLNB/FLOT2/ATP11A/NEDD4L/SYNE1/ARHGEF18/MORC3/MAPK8IP2/MTOR/SLC37A4/DFNB31/STEAP2/GAS2/PABPC1/NPTN/AMPD2/DK3/GLS2/AMPD3/GNAS/GPR26/GPER1/FFAR2/FLVCR1/SCG3/GSTP1/BRF1/TMOD4/GUCY1A3/ANXA2/SERPIND1/SOX8/KCNIP2/ANXA6/HK1/ACACB/HRH1/ACADL/HSP90AB1/HTR3A/FMN1/BARHL2/NME9/IGF1/IGF2/IL1R1/IL1RN/IL6/AQP2/AQP5/INHBA/IRF1/AQP9/ISL1/ITGA7/ITGB2/JUP/ATP9B/KCNH2/KCNJ8/KCNMB1/KDR/AMIGO3/LCK/LDLR/LGALS9/LTB1/SMAD3/MAP3K1/MF12/MYL2/NUPB1/ATP1A2/NOV/NPPC/NRAS/OPRL1/ATP5B/ANO7/PALM/PARK2/LEF1/PRR16/ANGPT4/PDE4C/SIRT6/PDE6B/ATP8A2/PIK3CG/PKHD1/PML/IL20RB/TLR9/TREM1/CYTL1/POMC/SSH1/APBB1P/FBLIM1/PALMD/SMPD3/SLC30A10/CHRNA9/SYBU/PARVA/PRKAR1B/PRKD1/MAPK3/PROC/SLAMF8/CDC42SE1/TRPC7/ACTR3B/ERMM/RDH14/METTL14/CCAR2/PXN/ACTA2/RASGRF2/RFC2/TRIM27/RPA3/BGLAP/SCT/CCL11/ABHD4/NOD2/STRA6/SGK1/BMP4/SLC4A1/SLC6A12/SLC8A1/SLC9A3/SLIT1/SOX9/STK3/VAMP2/TCEA1/TERF1/TGM2/TNFAIP3/TRPC4/TRPC6/CCR2/VARS/WNT10B/YWHAG/CA7/CACNA1E/PAX8/CXCR4/RAB7A/LST1/ZC3H14/ZC3H12A/RAB11FIP1/C6orf25/CALR/COLQ/CAPZB/SH3BGL3/HIST1H3A/ATP13A4/NR0B2/CASQ1/TTBK1/GAS7/SCIN/TP63/IRS2/ACTN1/FADD/TNFRSF11A/ALDH1A2/LIMD1/SYT7/LDB2/ESAM/SLC16A3/SMGT1/ADIPOQ/RAB3D/MTL5/RAPGEF2/ULK2                                                                                                                                                                                                                                                                                                                                                                                                                                                                                                                                                                                                                                                                                                                                                                                                                                                                                                                                          | 236 |

|            |                                         |         |            |          |          |          |                                                                                                                                                                                                                                                                                                                                                                                                                                                                                                                                                                                                                                                                                                                                                                                                                                                                                                                                                                                                                                                                                                                                                                                                                                                                                                                                                                                                                                                                                                                                                                                                                                                                                                                                                                                                                                                                                                                                                                                                                                                                                                                                                                                                                                                  |     |
|------------|-----------------------------------------|---------|------------|----------|----------|----------|--------------------------------------------------------------------------------------------------------------------------------------------------------------------------------------------------------------------------------------------------------------------------------------------------------------------------------------------------------------------------------------------------------------------------------------------------------------------------------------------------------------------------------------------------------------------------------------------------------------------------------------------------------------------------------------------------------------------------------------------------------------------------------------------------------------------------------------------------------------------------------------------------------------------------------------------------------------------------------------------------------------------------------------------------------------------------------------------------------------------------------------------------------------------------------------------------------------------------------------------------------------------------------------------------------------------------------------------------------------------------------------------------------------------------------------------------------------------------------------------------------------------------------------------------------------------------------------------------------------------------------------------------------------------------------------------------------------------------------------------------------------------------------------------------------------------------------------------------------------------------------------------------------------------------------------------------------------------------------------------------------------------------------------------------------------------------------------------------------------------------------------------------------------------------------------------------------------------------------------------------|-----|
| GO:0007165 | signal transduction                     | 349/901 | 5179/17046 | 2.47E-08 | 5.07E-06 | 3.99E-06 | AKT3/ABI1/CDH3/TANK/TSPAN5/CDH13/FARP1/KLRG1/RCAN2/CDKN1C/TCIRG1/MRVI1/PDPN/HCST/NPFFR2/ADCY3/LECT1/ESM1/CHI3L1/ERLIN2/EGLN2/PTH2/PDAP1/CHRNA1/CHRNA2/CHRNA5/SORCS1/CIDEA/AP3S1/CCR1/SEZ6/TNFAIP8L1/MAP3K8/ADM/IL13RA/ORA2A14/CRABP1/MIB2/MPP7/APCDD1/CTGF/SGOL1/PPM1L/CYLD/ADRB3/DOB1/ZNF366/BHLHA15/NLRP6/DMBT1/DRD4/DTNA/AGXT/EFNA2/EGFR/EIF4G1/A2M/TMEM17/EPHA1/EPHA3/EPHB4/ESR1/SPATA13/FCGR2A/FGA/FGF10/FHIT/RASA3/FOXL1/FOXC2/FOXO1/AKR1B1/SPG20/FLNB/RHOBTB2/NUP210/NEDD4L/PSD3/LARP1/PPP1R13B/PUM2/ARHGEF18/MAPK8IP2/TSSK2/MTOR/GABBR1/RASGEF1C/ALS2CL/TENM4/ACOT11/RGS22/PLEK2/ADGRF1/RPS6KC1/FGF22/NPTN/SDCBP2/PDE7B/DKK3/CYTH4/GPR162/BMP10/GNAS/GPR26/GPER1/FFAR2/GRB10/GRIK4/GSTP1/GUCY1A3/NME7/GPR132/ANXA2/SOX8/KCNI/P2/NRG1/ANXA6/HLA-B/HLA-DOA/HLA-DPA1/HLA-E/HLA-F/NR4A1/HPCA/HOXD3/HRH1/HSP90AA1/HSP90AB1/HTR3A/HTR5A/RSP02/IGF1/IGF2/CYR61/GPR142/IL1R1/IL1RN/IL6/IL10RA/IL11RA/IL12RB2/IL15RA/INHBA/IRF1/ISL1/ITGA7/ITGB2/ITGB7/JUP/CD82/KCNH2/KDR/HES5/STMN1/ORA2A5/LCK/LCP1/LDLR/ARHGDI1/LGALS9/LHCGR/LLGL1/LMNA/RAB19/LTB/LTBP1/SMAD3/MC2R/MCC/MAP3K1/MFNG/SCGB2A1/MITF/MOV10/PLEKHG7/NEDD9/ATP1A2/NFATC3/NMBR/NOV/NPPC/NRAS/NTF3/OAS2/OPRL1/ORA2C1/ORA2A2/P2RY6/IL21R/PALM/ARHGFE3/PARK2/SPOCK3/LEF1/DDX47/ANGPT4/PDE4C/PDE7A/PDE6B/PDGF/PAM2/PIK3CG/PITX2/PKHD1/PLA2G2A/PRKAG3/PML/GPR84/IL20RB/PNLP/TLR9/TREM1/CYTL1/POMC/RIN2/ZDHHC13/APBB1P/PPP1CB/PPP1CC/ARHGFE10L/MOB1A/CHRNA9/LIMS2/VAC14/PRKAR1B/IFT122/MCTP2/LMBRD1/PAG1/PRKD1/WSB2/MAPK3/MAP2K2/PRKRIR/HTRA1/CDC42SE1/PSMB4/PAK6/RGMA/LPAR5/PSMD7/PTGFR/PLEKHG5/TENM2/CCAR2/PTPRE/PXN/RASGRF2/RGR/RGS12/RIT2/S100A4/S100A6/CCL11/CCL17/NOD2/STRA6/SFRP2/CXCR5/ARHGAP9/SK1/MICAL1/TMEM237/BMP4/SLC8A1/BMPR1B/BOK/SOX9/STAT2/STK3/STK10/BST2/ZEB1/TEAD3/TGM2/TLE3/TLR5/TNFAIP3/TNFRSF1A/TNXB/TRA1/TRA5/TWIST1/CCR2/TNFRSF4/WNT10B/YWHAG/ZAP70/PAX8/CXCR4/FZD5/RAB7A/CARD14/BCL2L14/TMEM204/NLRX1/GPR157/CPEB4/C6orf25/CALR/UNC93B1/CAPS/HIST1H3A/ANTXR1/SLA2/CMAP/NROB2/CASQ1/IL1F10/TRIM63/RAE1/IFITM1/CDK10/RUNX1/TP63/RUNX3/IRS2/CRADD/FADD/TNFRSF11A/ALDH1A2/SPHK1/SKAP2/LIMD1/TSPAN18/CCRL2/PRC1/STARD13/PIAS2/MAP3K6/RSAD2/AURKB/DAPL1/CD8A/TRIP10/ADIPOQ/ARHGAP29/LY86/RAB3D/SMAD5-AS1/RAB36/ARHGFE10/NUP93/RAPGEF2/ULK2/CD79A/TELO2/IQSEC1/FGF19/NR1H4 | 349 |
| GO:0022610 | biological adhesion                     | 118/901 | 1348/17046 | 2.55E-08 | 5.07E-06 | 3.99E-06 | CDH3/GNE/CDH9/CDH12/CDH13/SPON2/PDPN/PKP3/FAT3/CCR1/COMP/MAP3K8/EGFLAM/CSTA/CTGF/CYLD/DDOST/DSG3/EGFR/EGR3/UNC13D/EPHA1/EPHA3/EPHB4/FAT2/FGA/FOXC2/NFASC/FLOT2/MTOR/NPTN/CYTH4/BMP10/GNAS/IZUMO1/HAS1/NRG1/HLA-DOA/HLA-DPA1/HLA-E/HLX/HOXD3/HSP90AB1/ZC3H12D/COL28A1/FMN1/IGF1/IGF2/CYR61/IL1RN/IL6/IRF1/ITGA7/ITGB2/ITGB7/JUP/KDR/AMIGO3/HES5/CDHR4/LAMA3/LCK/LCP1/ARHGDI1/LGALS9/LPP/SMAD3/MFI2/NEDD9/NFATC3/NOV/ATP5B/LEF1/PIK3CG/PKHD1/PML/IL20RB/APBB1P/FBLIM1/PPP1CB/LIMS2/PARVA/PAG1/PCDHGC4/PCDHGB7/PCDHGB3/PCDHGA11/SLURP1/TENM2/PXN/BGLAP/CCL11/PARVG/NOD2/TINAGL1/SFRP2/PCDH20/BMP4/SOX9/STK10/ZEB1/TGM2/TNXB/CCR2/TNFRSF4/ZAP70/FZD5/COL18A1/CALR/ANTXR1/SLA2/ACTN1/FADD/ESAM/RSAD2/IL32/CD8A/ADIPOQ                                                                                                                                                                                                                                                                                                                                                                                                                                                                                                                                                                                                                                                                                                                                                                                                                                                                                                                                                                                                                                                                                                                                                                                                                                                                                                                                                                                                                                                                                                                                 | 118 |
| GO:0009888 | tissue development                      | 140/901 | 1684/17046 | 2.78E-08 | 5.35E-06 | 4.21E-06 | ABI1/CDH3/SPG20/ZBTB18/DMRT2/LECT1/CHI3L1/CHRNA1/FRMD6/CCR1/COL11A1/COMP/ADM/CPS1/ZNF358/FAM101A/APCDD1/CSTA/CTGF/SMYD1/CYP11A1/DMBT1/DRD4/EGFR/EPHA3/ESR1/FGF10/SBNO2/FOXO1/FOXC2/EXPH5/SPG20/FLNB/FLOT2/VGLL2/TENM4/LCE2B/GATM/GJB2/BMP10/GNAS/SOX8/NRG1/HLX/HPCA/HOXB3/HOXC4/HOXD3/ID3/RSP02/FMN1/BARHL2/IGF1/CYR61/LCE1C/LCE1D/LCE2D/IL6/INHBA/ISL1/ITGA7/ITGB2/IVL/KDR/ACAT1/KRT15/INSC/HES5/LAMA3/LMNA/SMAD3/MEF2D/MAP3K1/MEOX1/MEOX2/MITF/MYL2/NFATC3/NOV/NPPC/NRAS/NTF3/LEF1/SIRT6/PDE6B/ATP8A2/PITX2/PKM/PLAGL1/PML/RIPK4/CYTL1/BNC2/IFT122/CSGALNACT1/BIN3/MAPK3/MAP2K2/PXN/ACTA2/S100A4/BGLAP/CCL11/STRA6/SFRP2/GZF1/BMP4/SLC8A1/BMPR1B/SOX9/STK3/ZEB1/ACTC1/TGM2/TCHH/TIMP3/TNFRSF1A/TWIST1/WNT10B/PAX8/FZD5/COL18A1/CALR/BFSP2/CASQ1/HOPX/KDM2B/LOXL3/SCIN/RUNX1/TP63/RUNX3/ALDH1A2/LDB2/CBFA2T2/ADIPOQ/H2AFY/MICAL2/RAPGEF2/FGF19                                                                                                                                                                                                                                                                                                                                                                                                                                                                                                                                                                                                                                                                                                                                                                                                                                                                                                                                                                                                                                                                                                                                                                                                                                                                                                                                                                                                  | 140 |
| GO:0007166 | cell surface receptor signaling pathway | 192/901 | 2511/17046 | 3.11E-08 | 5.79E-06 | 4.56E-06 | ABI1/CDH3/TSPAN5/CDH13/KLRG1/RCAN2/CDKN1C/TCIRG1/ADCY3/LECT1/ESM1/CIDEA/AP3S1/CCR1/IL13RA/MIB2/APCDD1/CTGF/PPM1L/CYLD/DOB1/AGXT/EFNA2/EGFR/EIF4G1/TMEM17/EPHA1/EPHA3/EPHB4/FCGR2A/FGA/FGF10/RASA3/FOXO1/SPG20/FLNB/NUP210/NEDD4L/ARHGFE18/MAPK8IP2/MTOR/ADGRF1/FGF22/NPTN/DKK3/BMP10/GPER1/FFAR2/GRB10/GRIK4/GSTP1/NME7/NRG1/HLA-B/HLA-DPA1/HLA-E/HLA-F/NR4A1/HOXD3/HSP90AA1/HSP90AB1/RSP02/IGF1/IGF2/CYR61/IL1R1/IL1RN/IL6/IL10RA/IL11RA/IL12RB2/IL15RA/INHBA/IRF1/ISL1/ITGA7/ITGB2/ITGB7/JUP/CD82/KDR/HES5/LCK/ARHGDI1/LLGL1/LMNA/LTB/LTBP1/SMAD3/MCC/MAP3K1/MFNG/MITF/MOV10/NEDD9/NFATC3/NOV/NPPC/NRAS/NTF3/OAS2/P2RY6/IL21R/ARHGFE3/PARK2/LEF1/DDX47/ANGPT4/PDGF/PAM2/PITX2/PRKAG3/PML/IL20RB/TLR9/PPP1CB/PPP1CC/LIMS2/PRKAR1B/IFT122/LMBRD1/PAG1/PRKD1/MAPK3/MAP2K2/HTRA1/PSMB4/RGMA/PSMD7/PLEKHG5/CCAR2/PTPRE/PXN/RASGRF2/RIT2/CCL11/CCL17/NOD2/SFRP2/CXCR5/TMEM237/BMP4/BMPR1B/BOK/SOX9/STAT2/STK3/BST2/ZEB1/TLE3/TNFAIP3/TNFRSF1A/TRA1/CCR2/TNFRSF4/WNT10B/ZAP70/CXCR4/FZD5/RAB7A/CARD14/BCL2L14/TMEM204/GPR157/CPEB4/C6orf25/SLA2/CMAP/NROB2/IL1F10/RAE1/IFITM1/TP63/RUNX3/IRS2/CRADD/FADD/TNFRSF11A/SPHK1/LIMD1/TSPAN18/CCRL2/RSAD2/CD8A/ADIPOQ/LY86/NUP93/RAPGEF2/CD79A/FGF19/NR1H4                                                                                                                                                                                                                                                                                                                                                                                                                                                                                                                                                                                                                                                                                                                                                                                                                                                                                                                                                                                                                                                   | 192 |
| GO:0007155 | cell adhesion                           | 117/901 | 1343/17046 | 3.84E-08 | 6.94E-06 | 5.46E-06 | CDH3/GNE/CDH9/CDH12/CDH13/SPON2/PDPN/PKP3/FAT3/CCR1/COMP/MAP3K8/EGFLAM/CSTA/CTGF/CYLD/DDOST/DSG3/EGFR/EGR3/UNC13D/EPHA1/EPHA3/EPHB4/FAT2/FGA/FOXC2/NFASC/FLOT2/MTOR/NPTN/CYTH4/BMP10/GNAS/IZUMO1/HAS1/NRG1/HLA-DOA/HLA-DPA1/HLA-E/HLX/HOXD3/ZC3H12D/COL28A1/FMN1/IGF1/IGF2/CYR61/IL1RN/IL6/IRF1/ITGA7/ITGB2/ITGB7/JUP/KDR/AMIGO3/HES5/CDHR4/LAMA3/LCK/LCP1/ARHGDI1/LGALS9/LPP/SMAD3/MFI2/NEDD9/NFATC3/NOV/ATP5B/LEF1/PIK3CG/PKHD1/PML/IL20RB/APBB1P/FBLIM1/PPP1CB/LIMS2/PARVA/PAG1/PCDHGC4/PCDHGB7/PCDHGB3/PCDHGA11/SLURP1/TENM2/PXN/BGLAP/CCL11/PARVG/NOD2/TINAGL1/SFRP2/PCDH20/BMP4/SOX9/STK10/ZEB1/TGM2/TNXB/CCR2/TNFRSF4/ZAP70/FZD5/COL18A1/CALR/ANTXR1/SLA2/ACTN1/FADD/ESAM/RSAD2/IL32/CD8A/ADIPOQ                                                                                                                                                                                                                                                                                                                                                                                                                                                                                                                                                                                                                                                                                                                                                                                                                                                                                                                                                                                                                                                                                                                                                                                                                                                                                                                                                                                                                                                                                                                                          | 117 |



|            |                                        |         |            |          |          |          |                                                                                                                                                                                                                                                                                                                                                                                                                                                                                                                                                                                                                                                                                                                                                                                                                                                                                                                                                                                                                                                                                                                                                                                                                                                                                                                                                                                                                                                                                                                                                                                                                                                                                                                                                                                                                                                                                                                                                                                                                                                                                                                                                                                                                                      |     |
|------------|----------------------------------------|---------|------------|----------|----------|----------|--------------------------------------------------------------------------------------------------------------------------------------------------------------------------------------------------------------------------------------------------------------------------------------------------------------------------------------------------------------------------------------------------------------------------------------------------------------------------------------------------------------------------------------------------------------------------------------------------------------------------------------------------------------------------------------------------------------------------------------------------------------------------------------------------------------------------------------------------------------------------------------------------------------------------------------------------------------------------------------------------------------------------------------------------------------------------------------------------------------------------------------------------------------------------------------------------------------------------------------------------------------------------------------------------------------------------------------------------------------------------------------------------------------------------------------------------------------------------------------------------------------------------------------------------------------------------------------------------------------------------------------------------------------------------------------------------------------------------------------------------------------------------------------------------------------------------------------------------------------------------------------------------------------------------------------------------------------------------------------------------------------------------------------------------------------------------------------------------------------------------------------------------------------------------------------------------------------------------------------|-----|
| GO:0051179 | localization                           | 347/901 | 5173/17046 | 4.79E-08 | 8.39E-06 | 6.60E-06 | ABI1/CDH3/TSPAN5/CDH13/KCNMB2/TCIRG1/TRDN/ABCA9/SPON2/COG5/TACC2/PDPN/TBR1/ADCY3/TMED10/SLC27A2/RER1/CHGA/CHI3L1/PKP3/EXOC3/CHRNA1/CHRNA2/CHRNA5/CIDEA/PANX3/RBP7/AP3S1/CLCA1/FRMD6/CCR1/SLC51B/C15orf27/SLC38A10/CNP/ADM/CRABP1/TRPM6/PARP4/MPP7/LDLRAD3/APCDD1/KLC3/CTGF/ABCC13/SH3D19/CYB561/CYLD/ESCO2/FITM1/TRPV3/DDOST/BHLHA15/NLRP6/DLG2/DMBT1/DNAH6/DNAH8/ABAT/DRD4/AGXT/EGFR/EGR3/A2M/UNC13D/SLC10A4/EPHA1/EPHA3/EPHB4/FAT2/SYB561/FCGR2A/PHACTR1/FGA/FGF10/RASA3/VASH1/TRAK1/FOXC2/EXPH5/NFASC/EPB41L3/GGA3/FLNB/FLOT2/MLC1/TBC1D1/NUP210/ATP11A/NEDD4L/SYNE1/MORC3/MAPK8IP2/MTOR/SLC37A4/SAMM50/SEC31B/STEAP2/GAPDHS/SLC17A5/GJA3/GJB2/SDCBP2/GLS2/VPS4A/BMP10/GNAS/CRACR2B/PIGW/GPR26/GPER1/FFAR2/GRB10/FLVCR1/GRIK4/DNAJC15/SCG3/GSTP1/NME7/ANXA2/HAS1/SOX8/KCNIP2/NRG1/ANXA6/HK1/ANXA13/HLA-E/NR4A1/ACACB/HPCA/APBA2/HRH1/HSPA1L/HSP90AA1/HSP90AB1/HTR3A/BARHL2/IGF1/IGF2/CYR61/IL1RN/IL6/AQP2/IL16/AQP5/INHBA/AQP9/ISL1/ITGA7/ITGB2/ITGB7/JUP/ATP9B/KCNH2/KCNJ8/KCNJ9/KCNMB1/KDR/IPO5/INSC/TOMM20L/SLC6A17/LAMA3/STMN1/LCK/LCP1/LDLR/LGALS9/LLGL1/LMNA/RAB19/LTBP1/SMAD3/MCC/MAP3K1/MF12/ASGR1/NUBP1/ATP1A2/NFATC3/NOV/NRAS/NTF3/OPRL1/SLC22A18/P2RY6/ATP5B/ANO7/PALM/PARK2/LEF1/CEND1/ANGPT4/PDE4C/PCYOX1/C11orf73/SIRT6/ATP8A2/PIK3CG/PITX2/PKHD1/LRP1B/PRKAG3/PML/FXYD6/SLCO1C1/PNLIP/TLR9/TREM1/POMC/PON1/RIN2/ZDHHC13/ROBO4/BANP/ELP3/DNAJC17/GOLPH3/SLC47A1/SLC29A3/TRPV6/SMPD3/SLC30A10/CHRNA9/SYBU/PEX26/PARVA/PRKAR1B/IFT122/LMBRD1/PRKD1/BIN3/APOBR/MAPK3/MAP2K2/PROC/MRAP/TRPV5/MASP1/CDC42SE1/PAK6/TRPC7/PLEKHG5/FAM60A/RASGRF2/TRIM27/EXOC4/RPL8/RPL29/S100A6/SCT/CCL11/CCL17/ABHD4/NOD2/TINAGL1/STRA6/SFRP2/SGK1/VPS33A/BMP4/SLC4A1/ZG16/SLC6A12/SLC8A1/SLC9A3/SLC20A2/SLIT1/SOX9/SRP68/STK10/SUPT6H/BST2/VAMP2/TGM2/TRAPP10/TNFAIP3/TNFRSF1A/TRPC4/TRPC6/TRPM2/PHLDA2/TWIST1/CCR2/TNFRSF4/UCP1/YWHAG/ZAP70/CA7/CACNA1E/PTP4A1/CACNB2/PAX8/CXCR4/FZD5/RAB7A/ZC3H12A/RAB11FIP1/COL18A1/CALR/UNC93B1/SLIRP/COLQ/SH3BGL3/SCRT1/DYNLRB2/SLC25A18/MFSD7/ATP13A4/NR0B2/MOBN1A/CASQ1/PARD6B/LOXL3/MGARP/RAE1/SLC43A1/IFITM1/SCIN/SERPINA6/IRS2/ACTN1/FADD/TNFRSF11A/SPHK1/ENDOU/LIMD1/MAP7/SYT7/ESAM/SLC16A3/RSAD2/SMDT1/AURKB/REEP6/TRIP10/ADIPOQ/RAB3D/H2AFY/RAB36/NUP93/RAPGEF2/USP6NL/RABGAP1L/FGF19/NR1H4 | 347 |
| GO:0071310 | cellular response to organic substance | 165/901 | 2092/17046 | 4.94E-08 | 8.41E-06 | 6.62E-06 | CDH13/CDKN1C/TCIRG1/SPON2/GJB6/NPF2R2/ADCY3/LECT1/CHI3L1/CIDEA/AP3S1/CCR1/IL31RA/CPS1/CTGF/CYP11A1/BHLHA15/DNMT3A/EGFR/EGR3/EIF4G1/EPHA3/ESR1/FGA/FGF10/RASA3/SBNO2/FOXC2/FOXO1/AKR1B1/SPG20/FLNB/MLC1/NUP210/NEDD4L/ARHGFE18/MTOR/FGF2/NPTN/BMP10/GNAS/GPER1/FFAR2/GRB10/GSTP1/HAS1/NRG1/HLA-B/HLA-DPA1/HLA-E/HLA-F/NR4A1/HRH1/HSP90AB1/HTR3A/IGF2/CYR61/IL1R1/IL1RN/IL6/IL10RA/IL11RA/IL12RB2/IL15RA/INHBA/IRF1/AQP9/ISL1/JUP/KDR/IPO5/HES5/LCK/ARHGDI1/LGALS9/LHCGR/LMNA/LMO2/LTB/LTBP1/SMAD3/MAP3K1/MOV10/ATP1A2/NRAS/OAS2/P2RY6/IL21R/ARHGFE3/PARK2/LEF1/PIK3CG/PRKAG3/PML/IL20RB/TLR9/SSH1/PPP1CB/PPP1CC/SYBU/PRKAR1B/LMBRD1/PRKD1/MAPK3/MAP2K2/HTRA1/PSMB4/RGMA/PSMD7/PTGFR/PLEKHG5/PTPRE/PXN/RASGRF2/RIT2/BGLAP/CCL11/CCL17/NOD2/SFRP2/CXCR5/BMP4/SLC8A1/BMPR1B/SOX9/STAT2/BST2/VAMP2/ZEB1/TIMP3/TLR5/TNFAIP3/TNFRSF1A/TWIST1/CCR2/TNFRSF4/WNT10B/CACNA1E/PAX8/CXCR4/CARD14/TMEM204/ZC3H12A/CPEB4/CALR/NR0B2/IL1F10/TRIM63/MGARP/RAE1/IFITM1/RUNX1/IRS2/FADD/TNFRSF11A/ALDH1A2/SPHK1/CCR2/RSAD2/ADIPOQ/LY86/NUP93/RAPGEF2/FGF19/NR1H4                                                                                                                                                                                                                                                                                                                                                                                                                                                                                                                                                                                                                                                                                                                                                                                                                                                                                                                                                                                                                                                                                                                                                                                        | 165 |
| GO:0048468 | cell development                       | 159/901 | 1998/17046 | 5.12E-08 | 8.48E-06 | 6.67E-06 | ABI1/FARP1/CDKN1C/SPEG/SPON2/ZBTB18/CEL1/TBR1/LECT1/GPRIN1/CLN5/FRMD6/SEZ6/CNP/COL9A3/COL11A1/SCLT1/ZFP42/ADM/FAM101A/BHLHA15/EFNA2/EGFR/EIF4G1/UNC13D/EPHA1/EPHA3/EPHB4/ESR1/FGA/FGF10/RASA3/BTBD3/FOXC2/EXPH5/SPG20/NFASC/EPB41L3/FLNB/NEDD4L/MAPK8IP2/TSSK2/MTOR/DFNB31/TENM4/GAPDHS/FGF2/2/NPTN/BMP10/GPER1/FLVCR1/TMOD4/ANXA2/SOX8/KCNIP2/NRG1/HOXB3/HOXD3/HSP90AA1/HSP90AB1/FMN1/BARHL2/IGF1/CYR61/IL6/INHBA/ISL1/ITGB7/HILS1/KDR/HES5/STMN1/ARHGDI1/LLGL1/LMNA/SMAD3/MAP3K1/MF12/LHX8/MYL2/NEU1/NFATC3/NPPC/NRAS/NTF3/PALM/PARK2/LEF1/SIRT6/ATP8A2/PITX2/PML/SSH1/MOV10L1/MXRAS/PIWIL2/PARVA/PRKD1/BIN3/MAPK3/MAP2K2/PSMB4/RGMA/TRPC7/PSMD7/TENM2/PXN/ACTA2/RASGRF2/S100A4/S100A6/BGLAP/SFRP2/SGK1/VPS33A/BMP4/SLC8A1/BMPR1B/SLIT1/SOX9/TAF4B/ZEB1/ACTC1/TEAD3/TNFRSF1A/TRPC4/TRPC6/TWIST1/WNT10B/YWHAG/CACNB2/PAX8/CXCR4/FZD5/LST1/C6orf25/COL18A1/CALR/SLIRP/SCRT1/ANTXR1/BFSP2/CASQ1/PARD6B/LOXL3/GA57/RUNX1/TP63/RUNX3/IRS2/ACTN1/ALDH1A2/LIMD1/CBFA2T2/ADIPOQ/ARHGFE10/RAPGEF2/ULK2/FGF19                                                                                                                                                                                                                                                                                                                                                                                                                                                                                                                                                                                                                                                                                                                                                                                                                                                                                                                                                                                                                                                                                                                                                                                                                                | 159 |
| GO:0009628 | response to abiotic stimulus           | 98/901  | 1071/17046 | 5.47E-08 | 8.61E-06 | 6.77E-06 | GJB6/NPF2R2/CHI3L1/PSIP1/EGLN2/COL11A1/ADM/CTGF/ADRB3/CYP11A1/TRPV3/DBB1/RNF168/DNMT3A/ABAT/DRD4/EGFR/ANKRD23/FOXO1/AKR1B1/MLC1/NUP210/MTOR/ACOT11/FBXL21/GJA3/DNAJC2/HPCA/HRH1/HSPA1L/HSP90AA1/HSP90AB1/IGF1/IL1R1/IL6/AQP2/IRF1/AQP9/IVL/JUP/KCNJ8/LCK/LDLR/LMNA/SMAD3/MAP3K1/ATP1A2/NFATC3/NPPC/PALM/ANGPT4/C11orf73/PDE6B/ATP8A2/PKM/PML/PNLIP/PPP1CB/PPP1CC/CHRNA9/MAPK3/CCAR2/RGR/RPA3/BGLAP/SCT/CCL11/STRA6/SFRP2/BMP4/SLC8A1/SOX9/TCRB2/TIMP3/TLR5/TNFRSF1A/TRPC6/TWIST1/CACNA1E/CXCR4/CPEB4/COL18A1/CASQ1/TRIM63/MGARP/RAE1/KMO/TP63/CRADD/FADD/TNFRSF11A/LIMD1/MAP7/AURKB/RCSD1/ADIPOQ/N4BP1/NUP93                                                                                                                                                                                                                                                                                                                                                                                                                                                                                                                                                                                                                                                                                                                                                                                                                                                                                                                                                                                                                                                                                                                                                                                                                                                                                                                                                                                                                                                                                                                                                                                                                         | 98  |

|            |                                     |         |            |          |          |          |                                                                                                                                                                                                                                                                                                                                                                                                                                                                                                                                                                                                                                                                                                                                                                                                                                                                                                                                                                                                                                                                                                                                                                                                                                                                                                                                                                                                                                                                                                                                                                                                                                                                                                                                                                                                                                                                                                                                                                                                                                                                                                                                                                                                                                                                                                                                                                                                                                                                                                                                                                                                                                                              |     |
|------------|-------------------------------------|---------|------------|----------|----------|----------|--------------------------------------------------------------------------------------------------------------------------------------------------------------------------------------------------------------------------------------------------------------------------------------------------------------------------------------------------------------------------------------------------------------------------------------------------------------------------------------------------------------------------------------------------------------------------------------------------------------------------------------------------------------------------------------------------------------------------------------------------------------------------------------------------------------------------------------------------------------------------------------------------------------------------------------------------------------------------------------------------------------------------------------------------------------------------------------------------------------------------------------------------------------------------------------------------------------------------------------------------------------------------------------------------------------------------------------------------------------------------------------------------------------------------------------------------------------------------------------------------------------------------------------------------------------------------------------------------------------------------------------------------------------------------------------------------------------------------------------------------------------------------------------------------------------------------------------------------------------------------------------------------------------------------------------------------------------------------------------------------------------------------------------------------------------------------------------------------------------------------------------------------------------------------------------------------------------------------------------------------------------------------------------------------------------------------------------------------------------------------------------------------------------------------------------------------------------------------------------------------------------------------------------------------------------------------------------------------------------------------------------------------------------|-----|
| GO:0051716 | cellular response to stimulus       | 415/901 | 6405/17046 | 5.49E-08 | 8.61E-06 | 6.77E-06 | AKT3/ABI1/CDH3/TANK/TSPAN5/CDH13/FARP1/KLRG1/RCAN2/CDKN1C/TCIRG1/MRVI1/SPON2/PDPN/GJB6/HCST/NPFFR2/ADCY3/LECT1/ESM1/CHGA/CHI3L1/ERLIN2/EGLN2/TP53TG1/PTH2/PDAP1/CHRNA1/CHRNA2/CHRNAS/SORCS1/CIDEA/AP3S1/CCR1/SEZ6/TNFAIP8L1/MAP3K8/ADM/IL31RA/HUS1B/OR2A14/CPS1/CRABP1/MIB2/PARP4/MPP7/APCDD1/CTGF/SGOL1/PPM1L/CYLD/ADRB3/ESCO2/CYP11A1/DBB1/RNF168/ZNF366/BHLHA15/NLRP6/DMBT1/DNMT3A/DRD4/DTNA/AGXT/EFNA2/EGFR/EGR3/EIF4G1/A2M/TMEM17/EPHA1/EPHA3/EPHB4/ESR1/SPATA13/FCGR2A/FGA/FGF10/FHIT/RASA3/PPM1E/VASH1/SBNO2/ACIN1/FOXO1/FOXO2/FOXO1/AKR1B1/SPG20/FLNB/MLC1/RHOBTB2/NUP210/NEDD4L/PSD3/LARP1/PPP1R13B/PUM2/ARHGFE18/MAPK8IP2/TSSK2/MTOR/SLC37A4/GABBR1/RASGEF1C/ALS2CL/TENM4/ACOT11/RGS22/FBXO2/PLEK2/ADGRF1/RP56KC1/DNAJC2/FGF22/NPTN/GJB2/SDCBP2/PDE7B/DKK3/CYTH4/GPR162/BMP10/GNAS/GPR26/GPER1/FFAR2/GRB10/GRIK4/DNAJC15/GSTP1/GUCY1A3/NME7/GPR132/ANXA2/HAS1/SOX8/KCNIP2/NRG1/ANXA6/HK1/HLA-B/HLA-DOA/HLA-DPA1/HLA-E/HLA-F/HMGA1/NR4A1/HPCA/HOXD3/HRH1/HSPA1L/HSP90AA1/HSP90AB1/HTR3A/HTR5A/RSP02/IGF1/IGF2/CYR61/GPR142/LCE1D/IL1R1/IL1RN/IL6/IL10RA/AQP2/IL11RA/IL12RB2/IL15RA/IL16/INHBA/IRF1/AQP9/ISL1/ITGA7/ITGB2/ITGB7/JUP/CD82/KCNH2/KDR/IPO5/KRT15/HES5/STMN1/OR2A5/LCK/LCP1/LDLR/ARHGDI/ALGALS9/LHCGR/LLGL1/LMNA/LMO2/RAB19/LTB/LTBP1/SMAD3/MC2R/MCC/MAP3K1/MFNG/SCGB2A1/MITF/ASGR1/MOV10/PLEKHG7/MT1A/NUDT1/NEDD9/ATP1A2/NFATC3/NMBR/NOV/NPPC/NRAS/NTF3/OAS2/OPRL1/OR2C1/OR3A2/P2RY6/IL21R/PALM/ARHGFE3/PARK2/SPOCK3/LEF1/DDX47/ANGPT4/PDE4C/PDE7A/C11orf73/SIRT6/PDE6B/PDGF/PDE6B/PIK3CG/PITX2/PKHD1/PLA2G2A/PRKAG3/PML/GPR84/IL20RB/PNLP/TLR9/TREM1/CYTL1/POMC/SSH1/RIN2/ZDHHC13/APBB1P/CYP2W1/PPP1CB/PPP1CC/ARHGFE10L/PRMT6/FANCI/MOB1A/WDR33/CHRNA9/SYBU/LIMS2/VAC14/PARVA/PRKAR1B/IFT122/MCTP2/LMBRD1/PAG1/PRKD1/WBS2/MAPK3/MAP2K2/PRKRIR/HTRA1/SLAMF8/CDC42SE1/PSMB4/PAK6/RGMA/LPAR5/PSMD7/PTGFR/PLEKHG5/TENM2/CCAR2/PTPRE/PXN/RASGRF2/RFC2/RGR/RGS12/RIT2/RPA3/S100A4/S100A6/BGLAP/CCL11/CCL17/NOD2/STRA6/SFRP2/CXCR5/ARHGAP9/SGK1/MICAL1/TMEM237/VPS33A/BMP4/SLC8A1/BMPR1B/BOK/SOX9/STAT2/STK3/STK10/BST2/VAMP2/TCEA1/TCEB2/ZEB1/TEAD3/TGM2/TIMP3/TLE3/TLR5/TNFAIP3/TNFRSF1A/TNXP/TRA1/TRA5/TRPC6/TWIST1/CCR2/TNFRSF4/UPP1/WNT10B/YWHAG/ZAP70/CA7/CACNA1E/PAX8/CXCR4/FZD5/RAB7A/CARD14/BCL2L14/TMEM204/NLRX1/GPR157/ZC3H12A/FAAP100/CPFB4/C6orf25/EEDP1/CALR/UNC93B1/CAPS/HIST1H3A/ANTXR1/SLA2/CMAHP/NROB2/CASQ1/IL1F10/TRIM63/MGARP/RAE1/IFITM1/CDK10/RUNX1/TP63/RUNX3/IRS2/CRADD/FADD/TNFRSF11A/ALDH1A2/SPHK1/SKAP2/STBD1/LIMD1/TSPAN18/CCR2/PRC1/STARD13/PIAS2/ZFAND2A/MAP3K6/RSAD2/AURKB/DAPL1/RCS1/CD8A/TRIP10/ADIPOQ/ARHGAP29/LY86/RAB3D/SMAD5-AS1/RAB36/ARHGFE10/N4BP1/NUP93/RAPGEF2/ULK2/CD79A/TELO2/IQSEC1/FGF19/NR1H4 | 415 |
| GO:0019932 | second-messenger-mediated signaling | 32/901  | 210/17046  | 6.21E-08 | 9.49E-06 | 7.47E-06 | CDH13/RCAN2/MRVI1/ADCY3/ADM/BHLHA15/DRD4/EGFR/GNAS/GUCY1A3/NRG1/HPCA/HRH1/HTR5A/IGF1/KDR/LHCGR/ATP1A2/NFATC3/PDE7A/MCTP2/PTGFR/TENM2/SLC8A1/SOX9/ZAP70/CXCR4/SLA2/CASQ1/SPHK1/CD8A/RAPGEF2                                                                                                                                                                                                                                                                                                                                                                                                                                                                                                                                                                                                                                                                                                                                                                                                                                                                                                                                                                                                                                                                                                                                                                                                                                                                                                                                                                                                                                                                                                                                                                                                                                                                                                                                                                                                                                                                                                                                                                                                                                                                                                                                                                                                                                                                                                                                                                                                                                                                   | 32  |
| GO:0051216 | cartilage development               | 29/901  | 179/17046  | 6.61E-08 | 9.85E-06 | 7.75E-06 | LECT1/CHI3L1/COL11A1/COMP/FAM101A/CTGF/BMP10/GNAS/HOXB3/HOXC4/HOXD3/RSP02/CYR61/HES5/SMAD3/MEF2D/NOV/NPPC/CYTL1/CSGALNACT1/MAPK3/SFRP2/BMP4/BMPR1B/SOX9/ZEB1/WNT10B/SCIN/RUNX3                                                                                                                                                                                                                                                                                                                                                                                                                                                                                                                                                                                                                                                                                                                                                                                                                                                                                                                                                                                                                                                                                                                                                                                                                                                                                                                                                                                                                                                                                                                                                                                                                                                                                                                                                                                                                                                                                                                                                                                                                                                                                                                                                                                                                                                                                                                                                                                                                                                                               | 29  |
| GO:0048870 | cell motility                       | 105/901 | 1187/17046 | 9.82E-08 | 1.39E-05 | 1.09E-05 | CDH13/PDPN/ADCY3/CHGA/CCR1/APCDD1/CTGF/DNAH6/DNAH8/EGFR/EGR3/EPHA1/EPHA3/EPHB4/FAT2/SPATA13/PHACTR1/FGF10/VASH1/FOXO2/GAPDH5/BMP10/GPER1/FFAR2/HAS1/SOX8/NRG1/NR4A1/HRH1/BARHL2/IGF1/CYR61/IL1RN/IL6/IL16/ISL1/ITGA7/ITGB2/ITGB7/JUP/KDR/LAMA3/LCK/LCP1/LGALS9/LMNA/SMAD3/MCC/MAP3K1/NOV/NRAS/NTF3/P2RY6/ATP5B/LEF1/CEND1/ANGPT4/PIK3CG/PITX2/PML/TREM1/ROBO4/ELP3/PARVA/PRKD1/BIN3/MAP2K2/PROC/PAK6/PLEKHG5/FAM60A/CCL11/CCL17/NOD2/SFRP2/SGK1/BMP4/SLC8A1/SOX9/STK10/BST2/PHLDA2/TWIST1/CCR2/ZAP70/CACNA1E/PTP4A1/CXCR4/COL18A1/CALR/SLIRP/SH3BGL3/SCRT1/PARD6B/IFITM1/IRS2/FADD/TNFRSF11A/SPHK1/LIMD1/ESAM/SLC16A3/ADIPOQ/RAPGEF2/FGF19                                                                                                                                                                                                                                                                                                                                                                                                                                                                                                                                                                                                                                                                                                                                                                                                                                                                                                                                                                                                                                                                                                                                                                                                                                                                                                                                                                                                                                                                                                                                                                                                                                                                                                                                                                                                                                                                                                                                                                                                                   | 105 |
| GO:0051674 | localization of cell                | 105/901 | 1187/17046 | 9.82E-08 | 1.39E-05 | 1.09E-05 | CDH13/PDPN/ADCY3/CHGA/CCR1/APCDD1/CTGF/DNAH6/DNAH8/EGFR/EGR3/EPHA1/EPHA3/EPHB4/FAT2/SPATA13/PHACTR1/FGF10/VASH1/FOXO2/GAPDH5/BMP10/GPER1/FFAR2/HAS1/SOX8/NRG1/NR4A1/HRH1/BARHL2/IGF1/CYR61/IL1RN/IL6/IL16/ISL1/ITGA7/ITGB2/ITGB7/JUP/KDR/LAMA3/LCK/LCP1/LGALS9/LMNA/SMAD3/MCC/MAP3K1/NOV/NRAS/NTF3/P2RY6/ATP5B/LEF1/CEND1/ANGPT4/PIK3CG/PITX2/PML/TREM1/ROBO4/ELP3/PARVA/PRKD1/BIN3/MAP2K2/PROC/PAK6/PLEKHG5/FAM60A/CCL11/CCL17/NOD2/SFRP2/SGK1/BMP4/SLC8A1/SOX9/STK10/BST2/PHLDA2/TWIST1/CCR2/ZAP70/CACNA1E/PTP4A1/CXCR4/COL18A1/CALR/SLIRP/SH3BGL3/SCRT1/PARD6B/IFITM1/IRS2/FADD/TNFRSF11A/SPHK1/LIMD1/ESAM/SLC16A3/ADIPOQ/RAPGEF2/FGF19                                                                                                                                                                                                                                                                                                                                                                                                                                                                                                                                                                                                                                                                                                                                                                                                                                                                                                                                                                                                                                                                                                                                                                                                                                                                                                                                                                                                                                                                                                                                                                                                                                                                                                                                                                                                                                                                                                                                                                                                                   | 105 |
| GO:0048583 | regulation of response to stimulus  | 236/901 | 3283/17046 | 1.05E-07 | 1.46E-05 | 1.15E-05 | ABI1/CDH3/TANK/TSPAN5/CDH13/FARP1/KLRG1/RCAN2/CDKN1C/SPON2/TBR1/HCST/NPFFR2/LECT1/ESM1/CHI3L1/CIDEA/CCR1/SEZ6/TNFAIP8L1/MAP3K8/ADM/IL31RA/MIB2/MPP7/APCDD1/CTGF/CYLD/ADRB3/RNF168/ZNF366/COCH/NLRP6/DMBT1/DRD4/EGFR/A2M/UNC13D/ESR1/F11/SPATA13/FCGR2A/FGA/FGF10/RASA3/VASH1/SBNO2/ACIN1/FOXO1/FOXO2/FOXO1/AKR1B1/SPG20/MLC1/RHOBTB2/NUP210/NEDD4L/PSD3/LARP1/PUM2/ARHGFE18/MAPK8IP2/MTOR/SLC37A4/ALS2CL/RGS22/DNAJC2/FGF22/NPTN/DKK3/CYTH4/BMP10/GNAS/GPER1/FFAR2/GRB10/GSTP1/ANXA2/NRG1/HK1/HLA-B/HLA-DPA1/HLA-E/HLA-F/HLX/HMGA1/NR4A1/HSPA1L/HSP90AA1/HSP90AB1/RSP02/IGF1/IGF2/CYR61/IL1R1/IL1RN/IL6/IL16/INHBA/IRF1/ISL1/ITGB2/ITGB7/JUP/KDR/HES5/LCK/ARHGDI/ALGALS9/LHCGR/LLGL1/LMNA/LTBP1/SMAD3/MCC/MAP3K1/MFNG/MOV10/PLEKHG7/NFATC3/NOV/NRAS/NTF3/PALM/ARHGFE3/PARK2/LEF1/C11orf73/SIRT6/PDE6B/PIK3CG/PKHD1/PLA2G2A/PML/IL20RB/TLR9/TREM1/ZDHHC13/PPP1CB/PPP1CC/ARHGFE10L/SYBU/LIMS2/IFT122/LMBRD1/PAG1/PRKD1/MAPK3/MAP2K2/PROC/MASP1/HTRA1/PSMB4/PAK6/PSMD7/PLEKHG5/CCAR2/PTPRE/PXN/RASGRF2/TRIM27/RGS12/RPA3/S100A4/CCL11/CCL17/NOD2/STRA6/SFRP2/ARHGAP9/TMEM237/BMP4/BMPR1B/SOX9/STAT2/STK3/SUPT6H/BST2/ZEB1/TLR5/TNFAIP3/TNFRSF1A/TNXP/TRA1/TRA5/TWIST1/CCR2/WNT10B/YWHAG/ZAP70/CA7/CACNA1E/CXCR4/FZD5/RAB7A/CARD14/BCL2L14/TMEM204/NLRX1/CALR/UNC93B1/HIST1H3A/SLA2/CMAHP/CASQ1/HOPX/TRIM63/RAE1/IFITM1/CDK10/RUNX1/TP63/RUNX3/IRS2/CRADD/FADD/TNFRSF11A/SPHK1/SKAP2/LIMD1/STARD13/PIAS2/MAP3K6/RSAD2/CD8A/TRIP10/ADIPOQ/ARHGAP29/LY86/ARHGFE10/NUP93/RAPGEF2/CD79A/TELO2/IQSEC1/FGF19                                                                                                                                                                                                                                                                                                                                                                                                                                                                                                                                                                                                                                                                                                                                                                                                                                                                                                                                                                                                                                                                                                                                                           | 236 |

|            |                                           |         |            |          |          |          |                                                                                                                                                                                                                                                                                                                                                                                                                                                                                                                                                                                                                                                                                                                                                                                                                                                                                                                                                                                                                                                                                                                                                                                                                                                                                                                                                                                                                                                                                                                                                                                                                                                                                                                                                                                                                   |     |
|------------|-------------------------------------------|---------|------------|----------|----------|----------|-------------------------------------------------------------------------------------------------------------------------------------------------------------------------------------------------------------------------------------------------------------------------------------------------------------------------------------------------------------------------------------------------------------------------------------------------------------------------------------------------------------------------------------------------------------------------------------------------------------------------------------------------------------------------------------------------------------------------------------------------------------------------------------------------------------------------------------------------------------------------------------------------------------------------------------------------------------------------------------------------------------------------------------------------------------------------------------------------------------------------------------------------------------------------------------------------------------------------------------------------------------------------------------------------------------------------------------------------------------------------------------------------------------------------------------------------------------------------------------------------------------------------------------------------------------------------------------------------------------------------------------------------------------------------------------------------------------------------------------------------------------------------------------------------------------------|-----|
| GO:0048519 | negative regulation of biological process | 285/901 | 4153/17046 | 2.25E-07 | 3.05E-05 | 2.40E-05 | ABI1/CDH3/CDH13/FARP1/CDKN1C/SPEG/MRVI1/TRDN/C1D/ZBTB18/CELF1/GJB6/LECT1/CHGA/ERLIN2/B4GALT7/CARD16/CIDEA/ANKRD9/CCR1/SEZ6/TNFAIP81/COMP/ADM/IL31RA/HUS1B/FAM101A/APCDD1/CTSA/CTGF/SMYD1/CYLD/ADRB3/TRPV3/DOB1/RNF168/ZNF366/BHLHA15/NLRP6/DLG2/DNMT3A/DRD4/EGFR/EGR3/PATL2/A2M/ELK4/EPHA1/ESR1/F11/PHACTR1/FGA/FGF10/FHIT/RASA3/PPM1E/VASH1/SBNO2/ACIN1/FOXO2/FOXO1/SPG20/DIP2A/FLOT2/NEDD4L/PPP1R13B/PUM2/RYBP/MORC3/MTOR/GABBR1/RGS22/GAS2/FBXO2/SACS/PABPC1/DNAJC2/DKK3/VPS4A/BMP10/GNAS/GPER1/GRB10/DNAJC15/GSTP1/TMOD4/GUCY1A3/GPR132/GZMA/ANXA2/HAS1/SERPIND1/SOX8/NRG1/HLA-B/HLA-DOA/ANXA13/HLA-E/HLX/HMGA1/NR4A1/ACACB/HPCA/HOXB3/HOXC6/ACADL/HSP90A1/ID3/ZC3H12D/COL28A1/RSPO2/IGF1/CYR61/IL1RN/IL6/INHBA/IRF1/ISL1/ITIH3/ITIH4/HLS1/KCNH2/KDR/KIF25/IPO5/HES5/STMN1/LCK/ARHGDI1/LGALS9/LMNA/LTBP1/SMAD3/MCC/MFI2/MITF/MOV10/MPZ/MT1A/MYL2/NUBP1/ATP1A2/NOV/NPPC/NRAS/NTF3/OPRL1/PAFAH2/ATP5B/PALM/PARK2/SPOCK3/LEF1/CEND1/ANGPT4/PDE4C/SIRT6/ATP8A2/PI3/PIK3CG/PITX2/PKH1/PLA2G2A/PLAGL1/PRKAG3/PML/RIPPLY3/IL20RB/TLR9/POMC/BANP/PPP1CB/PPP1CC/PIWIL2/PRMT6/DNAJC17/FANCI/CNOT11/LIMS2/PRKAR1B/IFT122/LMBRD1/PAG1/PRKD1/MAP2K2/PRKRIR/PROC/MASP1/HTRA1/CDC42SE1/PSMB4/PSMD7/SLURP1/PTGFR/TENM2/GATAD2B/METTL14/CCAR2/PTPRE/CREBZF/FAM60A/TRIM27/RGS12/SCT/CCL17/NOD2/SFRP2/GZF1/BMP4/ZNF649/SLC8A1/BMPR1B/SLIT1/SOX9/BPI/STK3/SUPT6H/BST2/TBP/ZEB1/ACTC1/TERF1/TIMP3/TNFAIP3/TNFRSF1A/TWIST1/CCR2/TNFRSF4/WNT10B/YWHAG/ZNF177/PAX8/FZD5/RAB7A/CARD14/LST1/NLRX1/ZC3H14/ZC3H12A/RAB11FIP1/CPFB4/COL18A1/CALR/SLIRP/CAST/CAPZB/SCRT1/HIST1H3A/SLA2/NROB2/CASQ1/HOPX/SPINK7/KDM2B/LOXL3/CBX2/IFITM1/GAS7/SCIN/CDK10/RUNX1/TPK63/RUNX3/SERPINA6/IRS2/ACTN1/CRADD/FADD/ALDH1A2/SPHK1/SKAP2/LIMD1/ERI1/PIAS2/CBFA2T2/RSAD2/AURKB/DAPL1/ADIPOQ/H2AFY/N4BP1/RAPGEF2/ULK2/FGF19/NR1H4                          | 285 |
| GO:0048522 | positive regulation of cellular process   | 292/901 | 4283/17046 | 2.72E-07 | 3.60E-05 | 2.83E-05 | ABI1/CDH3/TSPAN5/CDH13/CDKN1C/TCIRG1/TRDN/PDPN/DMRT2/TBR1/HCST/ADCY3/RER1/ESM1/CHI3L1/ERLIN2/PSIP1/CCR1/SLCS1B/SEZ6/MAP3K8/ADM/IL31RA/EGFLAM/MI2/MPP7/CTGF/SMYD1/SH3D19/CYLD/ADRB3/TRPV3/CITED4/DOB1/RNF168/BHLHA15/DMBT1/DNMT3A/ABAT/DRD4/ECE1/EEF2/EGFR/EGR3/EIF4G1/UNC13D/EPHA1/EPHA3/ESR1/FGA/FGF10/RASA3/PPM1E/SBNO2/ACIN1/FOXO2/FOXO1/EXPH5/AKR1B1/FLOT2/NEDD4L/LARP1/PUM2/ARHGEF18/MAPK8IP2/VGLL2/MTOR/RNF144B/TENM4/GAPDH5/PABPC1/DNAJC2/FGF22/NPTN/GLS2/VPS4A/BMP10/GNAS/GPR26/GPER1/DOK7/FFAR2/GRB10/GSTP1/BRF1/GUCY1A3/GZMA/ANXA2/SOX8/NRG1/HK1/HLA-DPA1/ANXA13/HLA-E/HLX/HMGA1/NR4A1/ACACB/HPCA/HOXB3/HRH1/HSPA1L/HSP90AA1/HSP90AB1/TFAP2E/ID3/RSPO2/FMN1/BARHL2/IGF1/IGF2/CYR61/IL1RN/IL6/IL12RB2/FOXK2/INHBA/IRF1/ISL1/JUP/KCNH2/KDR/IPO5/AMIGO3/HES5/STMN1/LCK/LCP1/LDLR/ARHGDI1/LGALS9/LHCGR/LMNA/LMO2/LTB/SMAD3/MC2R/MEF2D/MAP3K1/MEOX1/MEOX2/MFI2/MFNG/MI1TF/NEU1/NFATC3/NFYB/NHLH2/NOV/NPPC/NRAS/NTF3/OPRL1/P2RY6/PALM/ARHGEF3/PARK2/UTP11L/LEF1/PRR16/ANGPT4/SIRT6/ATP8A2/PIK3CG/PITX2/PKH1/PLA2G2A/PLAGL1/PML/RIPK4/TLR9/CYTL1/POMC/ZDHHC13/APBB1P/BANP/PIWIL2/ELP3/GOLPH3L/FANCI/SMPD3/LIMS2/PRKAR1B/PAG1/PRKD1/MAPK3/MAP2K2/MRAP/HTRA1/PSMB4/PAK6/ARNTL2/RGMA/PSMD7/ACTR3B/PTGFR/PLEKHG5/TENM2/MARK4/CCAR2/PXN/RASGRF2/TRIM27/S100A4/S100A6/SCT/CCL11/CCL17/NPAS3/NOD2/SFRP2/CXCR5/TRA2B/BMP4/ZNF649/SLC8A1/BMPR1B/BOK/SOX9/STK3/STK10/SUPT6H/BST2/VAMP2/TBP/TCEA1/TCEB2/ZEB1/TEAD3/TERF1/TGM2/TLR5/TNFAIP3/TNFRSF1A/TRAF1/TRAF5/TRPC6/TWIST1/CCR2/TNFRSF4/WNT10B/YWHAG/ZAP70/CA7/PTP4A1/PAX8/CXCR4/FZD5/RAB7A/CARD14/LST1/CSP1/ZC3H12A/COL18A1/CALR/SLA2/NROB2/HOPX/MGARP/IFITM1/SCIN/CDK10/RUNX1/TP63/RUNX3/IRS2/CRADD/FADD/TNFRSF11A/ALDH1A2/SPHK1/SKAP2/LIMD1/PRC1/PIAS2/ZFAND2A/MAP3K6/SYTY/LDB2/CBFA2T2/RSAD2/AURKB/CD8A/ADIPOQ/LY86/RAB3D/H2AFY/ARHGEF10/MICAL2/RAPGEF2/FGF19/NR1H4 | 292 |
| GO:0072358 | cardiovascular system development         | 80/901  | 861/17046  | 5.41E-07 | 6.83E-05 | 5.37E-05 | CDH13/SPEG/PDPN/LECT1/ESM1/CHI3L1/COL11A1/ADM/CTGF/SMYD1/ECE1/EGR3/EPHA1/EPHB4/FGF10/VASH1/FOXO1/FOXO2/FOXO1/MTOR/TENM4/BMP10/FLVCR1/ANXA2/NRG1/NR4A1/ACACB/HOXB3/ID3/IGF1/CYR61/IL6/ISL1/ITGA7/KCNJ8/KDR/LMNA/LOX/SMAD3/MEF2D/MEOX2/MYL2/NFATC3/NOV/ATP5B/LEF1/ANGPT4/SIRT6/PIK3CG/PITX2/PM L/RIPPLY3/ROBO4/PARVA/IFT122/PRKD1/ACTA2/CCL11/STRA6/SFRP2/BMP4/SLC8A1/SOX9/STK3/ACTC1/TNFAIP3/TWIST1/CCR2/FZD5/TMEM204/ZC3H12A/COL18A1/CALR/HOP X/RUNX1/ALDH1A2/SPHK1/MICAL2/RAPGEF2/FGF19                                                                                                                                                                                                                                                                                                                                                                                                                                                                                                                                                                                                                                                                                                                                                                                                                                                                                                                                                                                                                                                                                                                                                                                                                                                                                                                          | 80  |
| GO:0072359 | circulatory system development            | 80/901  | 861/17046  | 5.41E-07 | 6.83E-05 | 5.37E-05 | CDH13/SPEG/PDPN/LECT1/ESM1/CHI3L1/COL11A1/ADM/CTGF/SMYD1/ECE1/EGR3/EPHA1/EPHB4/FGF10/VASH1/FOXO1/FOXO2/FOXO1/MTOR/TENM4/BMP10/FLVCR1/ANXA2/NRG1/NR4A1/ACACB/HOXB3/ID3/IGF1/CYR61/IL6/ISL1/ITGA7/KCNJ8/KDR/LMNA/LOX/SMAD3/MEF2D/MEOX2/MYL2/NFATC3/NOV/ATP5B/LEF1/ANGPT4/SIRT6/PIK3CG/PITX2/PM L/RIPPLY3/ROBO4/PARVA/IFT122/PRKD1/ACTA2/CCL11/STRA6/SFRP2/BMP4/SLC8A1/SOX9/STK3/ACTC1/TNFAIP3/TWIST1/CCR2/FZD5/TMEM204/ZC3H12A/COL18A1/CALR/HOP X/RUNX1/ALDH1A2/SPHK1/MICAL2/RAPGEF2/FGF19                                                                                                                                                                                                                                                                                                                                                                                                                                                                                                                                                                                                                                                                                                                                                                                                                                                                                                                                                                                                                                                                                                                                                                                                                                                                                                                          | 80  |
| GO:0016477 | cell migration                            | 96/901  | 1095/17046 | 5.50E-07 | 6.83E-05 | 5.37E-05 | CDH13/CHGA/CCR1/APCDD1/CTGF/EGFR/EGR3/EPHA1/EPHA3/EPHB4/FAT2/SPATA13/FGF10/VASH1/FOXO2/BMP10/GPER1/FFAR2/HAS1/SOX8/NRG1/NR4A1/HRH1/BARHL2/IGF1/CYR61/IL1RN/IL6/IL16/ISL1/ITGA7/ITGB2/ITGB7/JUP/KDR/LAMA3/LCK/LCP1/LGALS9/LMNA/SMAD3/MCC/MAP3K1/NOV/NRAS/NTF3/P2RY6/ATP5B/LEF1/CEND1/ANGPT4/PIK3CG/PITX2/PML/TREM1/ROBO4/ELP3/PARVA/PRKD1/BIN3/PROC/PAK6/PLEKHG5/FAM60A/CCL11/CCL17/NOD2/SFRP2/SGK1/BMP4/SLC8A1/SOX9/STK10/BST2/PHLDA2/TWIST1/CR2/ZAP70/PTP4A1/CXCR4/COL18A1/CALR/SH3BGL3/SCRT1/PARD6B/IFITM1/IRS2/FADD/TNFRSF11A/SPHK1/LIMD1/ESAM/SLC16A3/ADIPOQ/RAPGEF2/FGF19                                                                                                                                                                                                                                                                                                                                                                                                                                                                                                                                                                                                                                                                                                                                                                                                                                                                                                                                                                                                                                                                                                                                                                                                                                    | 96  |
| GO:0040011 | locomotion                                | 133/901 | 1666/17046 | 6.63E-07 | 8.06E-05 | 6.34E-05 | CDH13/RCAN2/SPON2/PDPN/TBR1/ADCY3/CHGA/CCR1/COL9A3/APCDD1/CTGF/DNAH6/DNAH8/EFNA2/EGFR/EGR3/EPHA1/EPHA3/EPHB4/FAT2/SPATA13/PHACTR1/FGF10/RASA3/VASH1/FOXO2/NFASC/GAPDH5/FGF22/BMP10/GPER1/FFAR2/HAS1/SERPIND1/SOX8/NRG1/NR4A1/HRH1/HSP90AA1/HSP90AB1/BARHL2/IGF1/CYR61/IL1RN/IL6/IL16/ISL1/ITGA7/ITGB2/ITGB7/JUP/KDR/LAMA3/LCK/LCP1/LGALS9/LMNA/SMAD3/MCC/MAP3K1/ATP1A2/NOV/NRAS/NTF3/P2RY6/ATP5B/LEF1/CEND1/ANGPT4/PIK3CG/PITX2/PML/TREM1/ROBO4/ELP3/PARVA/PRKD1/BIN3/MAPK3/MAP2K2/PROC/PSMB4/PAK6/RGMA/TRPC7/PSMD7/PLEKHG5/TENM2/FAM60A/RASGRF2/CCL11/CCL17/NOD2/SFRP2/CXCR5/SGK1/BMP4/SLC8A1/SLC20A2/BMPR1B/SLIT1/SOX9/STK10/BST2/TRPC4/TRPC6/PHLDA2/TWIST1/CCR2/ZAP70/CACNA1E/PTP4A1/CACNB2/CXCR4/COL18A1/CALR/SLIRP/SH3BGL3/SCRT1/PARD6B/IFITM1/RUNX3/IRS2/FADD/TNFRSF11A/SPHK1/LIMD1/CCRL2/ESAM/SLC16A3/ADIPOQ/RAPGEF2/FGF19                                                                                                                                                                                                                                                                                                                                                                                                                                                                                                                                                                                                                                                                                                                                                                                                                                                                                                                                                                                 | 133 |

|            |                                                |         |            |          |          |          |                                                                                                                                                                                                                                                                                                                                                                                                                                                                                                                                                                                                                                                                                                                                                                                                                                                                                                                                                                                                                                                                                                                                                                                                                             |     |
|------------|------------------------------------------------|---------|------------|----------|----------|----------|-----------------------------------------------------------------------------------------------------------------------------------------------------------------------------------------------------------------------------------------------------------------------------------------------------------------------------------------------------------------------------------------------------------------------------------------------------------------------------------------------------------------------------------------------------------------------------------------------------------------------------------------------------------------------------------------------------------------------------------------------------------------------------------------------------------------------------------------------------------------------------------------------------------------------------------------------------------------------------------------------------------------------------------------------------------------------------------------------------------------------------------------------------------------------------------------------------------------------------|-----|
| GO:0070887 | cellular response to chemical stimulus         | 186/901 | 2524/17046 | 7.46E-07 | 8.89E-05 | 6.99E-05 | CDH13/CDKN1C/TCIRG1/SPON2/GJB6/NPFFR2/ADCY3/LECT1/CHGA/CHI3L1/EGLN2/CIDEA/AP3S1/CCR1/IL131RA/CPS1/CTGF/CYP11A1/BHLHA15/DNMT3A/EGFR/EGR3/EIF4G1/EPHA3/ESR1/FGA/FGF10/RASA3/PPM1E/SBNO2/FOXO2/FOXO1/AKR1B1/SPG20/FLNB/MCL1/NUP210/NEDD4L/ARHGFE18/MTOR/FGF22/NPTN/GJB2/BMP10/GNAS/GPER1/FFAR2/GRB10/GSTP1/HAS1/NRG1/HLA-B/HLA-DPA1/HLA-E/HLA-F/NR4A1/HPCA/HRH1/HSP90A1/HTR3A/IGF2/CYR61/LCE1D/IL1R1/IL1RN/IL6/IL10RA/AQP2/IL11RA/IL12RB2/IL15RA/IL16/INHBA/IRF1/AQP9/ISL1/ITGB2/JUP/KCNH2/KDR/PO5/HES5/LCK/ARHGDI1/LGALS9/LHCGR/LMNA/LMO2/LTB/LTPB1/SMAD3/MAP3K1/MOV10/MT1A/ATP1A2/NFATC3/NOV/NRAS/OAS2/P2RY6/IL12R/ARHGFE3/PARK2/LEF1/ANGPT4/PIK3CG/PRKAG3/PML/IL20RB/TLR9/TREM1/SSH1/CYP2W1/PPP1CB/PPP1CC/SYBU/PARVA/PRKAR1B/LMBRD1/PRKD1/MAPK3/MAP2K2/HTRA1/SLAMF8/PSMB4/RGMA/PSMD7/PTGFR/PLEKHG5/PTPRE/PXN/RASGRF2/RIT2/BGLAP/CCL11/CCL17/NOD2/SFRP2/CXCR5/BMP4/SLC8A1/BMPR1B/SOX9/STAT2/BST2/VAMP2/TCEB2/ZEB1/TIMP3/TLR5/TNFAIP3/TNFRSF1A/TRPC6/TWIST1/CCR2/TNFRSF4/WNT10B/CACNA1E/PAX8/CXCR4/CARD14/TMEM204/ZC3H12A/CPEB4/CALR/NROB2/IL1F10/TRIM63/MGARP/RAE1/IFITM1/RUNX1/IRS2/FAAD/TNFRSF11A/ALDH1A2/SPHK1/CCRL2/ZFAND2A/RSAD2/ADIPOQ/LY86/NUP93/RAPGEF2/FGF19/NR1H4                                                  | 186 |
| GO:0012501 | programmed cell death                          | 136/901 | 1718/17046 | 7.76E-07 | 9.07E-05 | 7.13E-05 | C1D/GJB6/CHI3L1/EGLN2/CARD16/CIDEA/ANKRD9/COMP/MAP3K8/ADM/IL131RA/CTGF/CYLD/DB1/DNMT3A/DSG3/EGFR/EGR3/ESR1/FGA/FGF10/PHIT/ACIN1/FOXO2/FOXO1/EPB41L3/DIP2A/PPP1R13B/ARHGFE18/RYPB/RNF144B/GAS2/GLS2/BMP10/GPER1/GSTP1/GZMA/SOX8/NRG1/ANXA6/HSP90A1/ID3/IGF1/CYR61/IL1RN/IL6/INHBA/IRF1/ISL1/ITGB2/KDR/ARHGDI1/LGALS9/LMNA/SMAD3/MEF2D/MAP3K1/MPZ/NTF3/PFAH2/ARHGFE3/PARK2/UTP11L/LEF1/DDX47/ANGPT4/PIK3CG/PKHD1/PKM/PLAGL1/PLEC/PML/PPP2R2B/LIMS2/PRKD1/MAPK3/PROC/PSMB4/PAK6/PSMD7/PTGFR/PLEKHG5/MARK4/CCAR2/RASGRF2/SCT/NOD2/SFRP2/SGK1/BMP4/BMPR1B/BOK/SOX9/STK3/STK10/ACTC1/TERF1/TGM2/TNFAIP3/TNFRSF1A/TRAFF1/TRAFF5/PHLDA2/TWIST1/TNFRSF4/WNT10B/YWHAG/PAX8/CXCR4/FZD5/CARD14/BCL2L14/FAM188A/ZC3H12A/CPEB4/COL18A1/CLPTM1L/CALR/CAST/KDM2B/SCIN/TP63/RUNX3/IRS2/ACTN1/CRADD/FADD/ALDH1A2/SPHK1/MAP3K6/AURKB/DAPL1/ADIPOQ/LY86/RAPGEF2                                                                                                                                                                                                                                                                                                                                                                                 | 136 |
| GO:0009719 | response to endogenous stimulus                | 127/901 | 1578/17046 | 8.07E-07 | 9.17E-05 | 7.21E-05 | CDH13/CDKN1C/TCIRG1/NPFFR2/ADCY3/TMED10/CHRNA1/CHRNA2/CHRNA5/CIDEA/AP3S1/ADM/CPS1/CTGF/CYP11A1/CITED4/ZNF366/DNMT3A/ABAT/DRD4/AGXT/EGFR/EGR3/EIF4G1/ESR1/FGA/FGF10/RASA3/FOXO2/FOXO1/AKR1B1/SPG20/NEDD4L/ARHGFE18/MTOR/STEAP2/GATM/FGF22/NPTN/GJB2/BMP10/GNAS/GPER1/GRB10/HAS1/NRG1/NR4A1/HPCA/HRH1/HTR3A/HTR5A/IGF2/CYR61/IL1R1/IL1RN/IL6/INHBA/AQP9/ISL1/JUP/ACAT1/PO5/HES5/LCK/LHCGR/LMO2/LOX/LTPB1/SMAD3/ME1/MAP3K1/MOV10/ATP1A2/NRAS/OPRL1/P2RY6/PARK2/LEF1/PIK3CG/PITX2/PKM/PRKAG3/PML/TLR9/SSH1/PPP1CB/PPP1CC/CHRNA9/PRKAR1B/LMBRD1/MAPK3/MAP2K2/HTRA1/PSMB4/RGMA/PSMD7/PTGFR/PTPRE/PXN/RASGRF2/BGLAP/NOD2/SFRP2/BMP4/SLC8A1/SLC9A3/BMPR1B/SOX9/VAMP2/ZEB1/TIMP3/TNFAIP3/WNT10B/PAX8/CPEB4/CALR/NROB2/TRIM63/MGARP/RUNX1/RUNX3/IRS2/ALDH1A2/ADIPOQ/RAPGEF2/FGF19/NR1H4                                                                                                                                                                                                                                                                                                                                                                                                                                               | 127 |
| GO:0051239 | regulation of multicellular organismal process | 172/901 | 2298/17046 | 8.25E-07 | 9.17E-05 | 7.21E-05 | CDH3/KCNMB2/MRVI1/TRDN/SPON2/DMRT2/CEL1F1/CEL2/TBR1/LECT1/CHI3L1/CIDEA/CCR1/SEZ6/ADM/CPS1/FAM101A/CTGF/CYLD/ADRB3/TRPV3/NLRP6/DIO3/DMBT1/ABAT/DRD4/ECE1/EGR3/EIF4G1/EPHA1/EPHA3/ESR1/F11/FGA/FGF10/VASH1/ACIN1/FOXO2/FOXO1/SPG20/NEDD4L/PUM2/MTOR/TENM4/NPTN/BMP10/GNAS/GPER1/FFAR2/FLVCR1/GSTP1/GUCY1A3/ANXA2/SOX8/KCNIP2/NRG1/ANXA6/HLA-B/HLA-DPA1/HLA-E/HLX/ACACB/HOXB3/HOXD3/HRH1/ID3/RSPO2/BARHL2/IGF1/CYR61/IL1RN/IL6/IL12RB2/INHBA/IRF1/ISL1/JUP/KCNH2/KDR/AMIGO3/HES5/LAMA3/LCK/ARHGDI1/LGALS9/LTB/S/SMAD3/MCC/MITF/MYL2/NEU1/ATP1A2/NOV/NPPC/NRAS/NTF3/OPRL1/PALM/PARK2/LEF1/CEND1/ANGPT4/ATP8A2/PIK3CG/PML/IL20RB/TLR9/POMC/SSH1/LIMS2/IFT122/PRKD1/MAP2K2/PROC/TRIM27/BGLAP/SCT/CCL11/NOD2/SFRP2/SGK1/BMP4/SLC8A1/BMPR1B/SLIT1/SOX9/BPI/STK3/SUPT6H/BST2/ZEB1/TEAD3/TLR5/TNFAIP3/TNFRSF1A/PHLDA2/TWIST1/CCR2/TNFRSF4/WNT10B/YWHAG/ZAP70/CACNA1E/PAX8/CXCR4/FZD5/NLRX1/ZC3H12A/RAB11FIP1/CALR/COLQ/SH3BGR1/SCRT1/CASQ1/HOPX/TRIM63/IFITM1/SCIN/RUNX1/TP63/FADD/TNFRSF11A/SPHK1/LIMD1/PIAS2/CBFA2T2/RSAD2/ADIPOQ/H2AFY/RAPGEF2/ULK2                                                                                                                                                                                | 172 |
| GO:0051270 | regulation of cellular component movement      | 66/901  | 672/17046  | 8.31E-07 | 9.17E-05 | 7.21E-05 | CDH13/PDPN/TBR1/CCR1/EGFR/EPHA1/SPATA13/FGF10/VASH1/FOXO2/NEDD4L/BMP10/GPER1/HAS1/IGF1/CYR61/IL1RN/IL6/JUP/KCNH2/KDR/LAMA3/STMN1/LGALS9/LMNA/SMAD3/MCC/MAP3K1/ATP1A2/NOV/NTF3/P2RY6/LEF1/ANGPT4/PITX2/PKHD1/ROBO4/ELP3/PRKD1/MAP2K2/FAM60A/CCL11/NOD2/SFRP2/SGK1/BMP4/SLC8A1/SOX9/STK10/BS2/PHLDA2/TWIST1/CCR2/PTP4A1/COL18A1/CALR/SH3BGR1/SCRT1/PARD6B/IFITM1/IRS2/ACTN1/FADD/SPHK1/ADIPOQ/RAPGEF2                                                                                                                                                                                                                                                                                                                                                                                                                                                                                                                                                                                                                                                                                                                                                                                                                         | 66  |
| GO:0009966 | regulation of signal transduction              | 176/901 | 2366/17046 | 8.86E-07 | 9.60E-05 | 7.55E-05 | CDH3/TSPAN5/CDH13/FARP1/RCAN2/CDKN1C/HCST/NPFFR2/LECT1/ESM1/CHI3L1/CIDEA/CCR1/SEZ6/TNFAIP8L1/MAP3K8/ADM/IL131RA/MIB2/MPP7/APCDD1/CTGF/CYLD/ADRB3/ZNF366/NLRP6/DRD4/EGFR/A2M/ESR1/SPATA13/FGA/FGF10/RASA3/FOXO1/FOXO1/AKR1B1/SPG20/RHOBTB2/NEDD4L/PSD3/PUM2/ARHGFE18/MAPK8IP2/MTOR/ALS2CL/RGS22/FGF22/NPTN/DKK3/CYTH4/BMP10/GNAS/GPER1/GRB10/GSTP1/ANXA2/NRG1/HSP90A1/RSPO2/IGF1/IGF2/CYR61/IL1RN/IL6/INHBA/IRF1/ISL1/JUP/KDR/HES5/LCK/ARHGDI1/LGALS9/LHCGR/LLGL1/LMNA/LTBP1/SMAD3/MCC/MAP3K1/MFNG/PLEKHG7/NOV/NRAS/NTF3/PALM/ARHGFE3/PARK2/LEF1/PDE6B/PIK3CG/PKHD1/PLA2G2A/PML/TLR9/ZDHH13/PPP1CB/PPP1CC/ARHGFE10L/LIMS2/IFT122/LMBRD1/PAG1/PRKD1/MAPK3/MAP2K2/HTRA1/PSMB4/PAK6/PSMD7/PLEKHG5/CCAR2/PTPRE/PXN/RASGRF2/RGS12/S100A4/CCL11/CCL17/NOD2/SFRP2/ARHGAP9/TMEM237/BMP4/BMPR1B/SOX9/STAT2/STK3/BST2/ZEB1/TLR5/TNFAIP3/TNFRSF1A/TNXB/TRAFF1/TRAFF5/TWIST1/WNT10B/YWHAG/ZAP70/CXCR4/FZD5/RAB7A/CARD14/BCL2L14/TMEM204/NLRX1/CALR/SLA2/CMAHP/CDK10/RUNX1/TP63/RUNX3/IRS2/CRADD/FADD/TNFRSF11A/SPHK1/SKAP2/LIMD1/STARD13/PIAS2/MAP3K6/RSAD2/CD8A/TRIP10/ADIPOQ/ARHGAP29/LY86/ARHGFE10/RAPGEF2/TELO2/IQSEC1/FGF19                                                                                                         | 176 |
| GO:0023051 | regulation of signaling                        | 195/901 | 2685/17046 | 1.02E-06 | 0.00011  | 8.44E-05 | CDH3/TSPAN5/CDH13/FARP1/RCAN2/CDKN1C/TRDN/HCST/NPFFR2/LECT1/ESM1/CHI3L1/CIDEA/CCR1/SEZ6/TNFAIP8L1/MAP3K8/ADM/IL131RA/MIB2/MPP7/APCDD1/CTGF/CYLD/ADRB3/ZNF366/NLRP6/ABAT/DRD4/ECE1/EGFR/A2M/ESR1/SPATA13/FGA/FGF10/RASA3/FOXO1/FOXO1/AKR1B1/SPG20/RHOBTB2/NEDD4L/PSD3/PUM2/ARHGFE18/MAPK8IP2/MTOR/ALS2CL/PNKD/RGS22/FGF22/NPTN/DKK3/CYTH4/BMP10/GNAS/GPER1/FFAR2/GRB10/GSTP1/ANXA2/NRG1/HRH1/HSP90A1/RSPO2/IGF1/IGF2/CYR61/IL1RN/IL6/INHBA/IRF1/ISL1/JUP/KDR/HES5/LCK/ARHGDI1/LGALS9/LHCGR/LLGL1/LMNA/LTBP1/SMAD3/MCC/MAP3K1/MFNG/PLEKHG7/ATP1A2/NOV/NRAS/NTF3/PALM/ARHGFE3/PARK2/LEF1/PDE6B/PIK3CG/PKHD1/PLA2G2A/PML/TLR9/POMC/ZDHH13/PPP1CB/PPP1CC/ARHGFE10L/SYBU/LIMS2/PRKAR1B/IFT122/LMBRD1/PAG1/PRKD1/MAPK3/MAP2K2/HTRA1/PSMB4/PAK6/PSMD7/PLEKHG5/CCAR2/PTPRE/PXN/RASGRF2/RGS12/S100A4/SCT/CCL11/CCL17/NOD2/SFRP2/ARHGAP9/TMEM237/BMP4/BMPR1B/SOX9/STAT2/STK3/BST2/VAMP2/ZEB1/TLR5/TNFAIP3/TNFRSF1A/TNXB/TRAFF1/TRAFF5/TWIST1/WNT10B/YWHAG/ZAP70/CA7/CACNA1E/PAX8/CXCR4/FZD5/RAB7A/CARD14/BCL2L14/TMEM204/NLRX1/RAB11FIP1/CALR/SLA2/CMAHP/NROB2/CDK10/RUNX1/TP63/RUNX3/IRS2/CRADD/FADD/TNFRSF11A/SPHK1/SKAP2/LIMD1/STARD13/PIAS2/MAP3K6/SYT7/RSAD2/CD8A/TRIP10/ADIPOQ/ARHGAP29/LY86/ARHGFE10/RAPGEF2/TELO2/IQSEC1/FGF19 | 195 |

|            |                                     |         |            |          |         |          |                                                                                                                                                                                                                                                                                                                                                                                                                                                                                                                                                                                                                                                                                                                                                                                                                                                                                                                                                                                                                                                                                                                                                                                                                                      |     |
|------------|-------------------------------------|---------|------------|----------|---------|----------|--------------------------------------------------------------------------------------------------------------------------------------------------------------------------------------------------------------------------------------------------------------------------------------------------------------------------------------------------------------------------------------------------------------------------------------------------------------------------------------------------------------------------------------------------------------------------------------------------------------------------------------------------------------------------------------------------------------------------------------------------------------------------------------------------------------------------------------------------------------------------------------------------------------------------------------------------------------------------------------------------------------------------------------------------------------------------------------------------------------------------------------------------------------------------------------------------------------------------------------|-----|
| GO:0098602 | single organism cell adhesion       | 68/901  | 704/17046  | 1.03E-06 | 0.00011 | 8.44E-05 | CDH3/CDH9/PDPN/PKP3/MAP3K8/CSTA/CYLD/DDOST/EGFR/EGR3/UNC13D/EPHA1/FGA/NFASC/FLOT2/MTOR/GNAS/HLA-DOA/HLA-DPA1/HLA-E/HLX/ZC3H12D/IGF1/IGF2/CYR61/IL1RN/IL6/IRF1/ITGA7/ITGB2/ITGB7/JUP/LCK/LCP1/LGALS9/SMAD3/MFI2/NFATC3/NOV/LEF1/PIK3CG/PKHD1/IL20RB/APBB1P/FBLIM1/LIMS2/PARVA/PAG1/TENM2/PXN/NOD2/BMP4/SOX9/STK10/ZEB1/TNXB/CCR2/TNFRSF4/ZAP70/FZD5/CALR/ANTXR1/SLA2/FADD/ESAM/RSAD2/CD8A/ADIPOQ                                                                                                                                                                                                                                                                                                                                                                                                                                                                                                                                                                                                                                                                                                                                                                                                                                      | 68  |
| GO:0042127 | regulation of cell proliferation    | 114/901 | 1385/17046 | 1.08E-06 | 0.00011 | 8.74E-05 | ABI1/CDH3/CDH13/CDKN1C/SPEG/TCIRG1/GJB6/LECT1/ESM1/B4GALT7/ADM/IL13RA/CTGF/EGFR/EGR3/EPHA1/ESR1/FGF10/VASH1/FOXO1/AKR1B1/MORC3/MTOR/FBXO2/BMP10/GPER1/GSTP1/ANXA2/SOX8/NRG1/HLA-DPA1/HLA-E/HLX/HMGA1/NR4A1/TFAP2E/ZC3H12D/IGF1/IGF2/CYR61/IL6/IL12RB2/INHBA/IRF1/ISL1/JUP/KDR/HES5/LCK/LGALS9/SMAD3/MCC/MITF/NEU1/NOV/NPPC/NRAS/NTF3/LEF1/CEND1/SIRT6/ATP8A2/PITX2/PKHD1/PLA2G2A/PML/RIPPLY3/IL20RB/LIMS2/IFT122/PRKD1/PRKRIR/HTRA1/SLURP1/PTGFR/RPA3/S100A6/CCL11/NOD2/SFRP2/SGK1/BMP4/BMPR1B/SOX9/STK3/ZEB1/TNFAIP3/TRAF5/TWIST1/CCR2/TNFRSF4/WNT10B/ZAP70/FZD5/LST1/COL18A1/CALR/KDM2B/IFITM1/SCIN/CDK10/RUNX1/TP63/RUNX3/IRS2/FADD/TNFRSF11A/ALDH1A2/SPHK1/SKAP2/PRC1/ADIPOQ/RAPGEF2/FGF19                                                                                                                                                                                                                                                                                                                                                                                                                                                                                                                                       | 114 |
| GO:0006915 | apoptotic process                   | 134/901 | 1700/17046 | 1.20E-06 | 0.00012 | 9.52E-05 | C1D/GJB6/CHI3L1/EGLN2/CARD16/CIDEA/ANKRD9/COMP/MAP3K8/ADM/IL13RA/CTGF/CYLD/DBB1/DNMT3A/DSG3/EGFR/EGR3/ESR1/FGA/FGF10/FHIT/ACIN1/FOXC2/FOXO1/EPB41L3/DIP2A/PPP1R13B/ARHGFE18/RYPB/RNF144B/GAS2/GLS2/BMP10/GPER1/GSTP1/GZMA/SOX8/NRG1/ANXA6/HSP90AB1/ID3/IGF1/CYR61/IL1RN/IL6/INHBA/IRF1/ISL1/ITGB2/KDR/LCK/ARHGDI/LGALS9/LMNA/SMAD3/MEF2D/MAP3K1/MPZ/NTF3/PFAH2/ARHGFE3/PARK2/UTP11L/LEF1/DDX47/ANGPT4/PIK3CG/PKHD1/PLAGL1/PLEC/PML/PPP2R2B/LIMS2/PRKD1/MAPK3/PROC/PSMB4/PAK6/PSMD7/PTGFR/PLEKHG5/CCAR2/RASGRF2/SCT/NOD2/SFRP2/SGK1/BMP4/BMPR1B/BOK/SOX9/STK3/STK10/ACTC1/TERF1/TGM2/TNF/AIP3/TNFRSF1A/TRAF1/TRAF5/PHLDA2/TWIST1/TNFRSF4/WNT10B/YWHAG/PAX8/CXCR4/FZD5/CARD14/BCL2L14/FAM188A/ZC3H12A/CPEB4/COL18A1/CLPTM1L/CALR/CAST/KDM2B/SCIN/TP63/RUNX3/IRS2/ACTN1/CRADD/FADD/ALDH1A2/SPHK1/MAP3K6/AURKB/DAPL1/ADIPOQ/LY86/RAPGEF2                                                                                                                                                                                                                                                                                                                                                                                                 | 134 |
| GO:0010646 | regulation of cell communication    | 197/901 | 2731/17046 | 1.42E-06 | 0.00014 | 0.00011  | CDH3/TSPAN5/CDH13/FARP1/RCAN2/CDKN1C/TRDN/HCT/NPFFR2/LECT1/ESM1/CHI3L1/CIDEA/CCR1/SEZ6/TNFAIP8L1/MAP3K8/ADM/IL13RA/MIB2/MPP7/APCDD1/CTGF/CYLD/ADRB3/ZNF366/NLRP6/ABAT/DRD4/EGFR/A2M/ESR1/SPATA13/FGA/FGF10/RASA3/FOXL1/FOXO1/AKR1B1/SPG20/RHOBTB2/NEDD4L/PSD3/LARP1/PUM2/ARHGFE18/MAPK8IP2/MTOR/ALS2CL/PNKD/RGS22/FGF22/NPTN/DKK3/CYTH4/BMP10/GNAS/GPER1/FFAR2/GRB10/GSTP1/ANXA2/NRG1/HK1/HRH1/HSP90AB1/RSP02/IGF1/IGF2/CYR61/IL1RN/IL6/INHBA/IRF1/ISL1/JUP/KDR/HES5/LCK/ARHGDI/LGALS9/LHCGR/LGL1/LMNA/LTPB1/SMAD3/MCC/MAP3K1/MFNG/PLEKHG7/ATP1A2/NOV/NRAS/NTF3/PALM/ARHGFE3/PARK2/LEF1/PDE4C/PDE6B/PIK3CG/PKHD1/PLA2G2A/PML/TLR9/POMC/ZDHHC13/PPP1CB/PPP1CC/ARHGFE10L/SYBU/LIMS2/PRKAR1B/IFT122/LMBRD1/PAG1/MAPK3/MAP2K2/HTR A1/PSMB4/PAK6/PSMD7/PLEKHG5/CCAR2/PTPRE/PXN/RASGRF2/RGS12/S100A4/SCT/CCL11/CCL17/NOD2/SFRP2/ARHGAP9/TMEM237/BMP4/SLC8A1/BMPR1B/SOX9/STAT2/STK3/BST2/VAMP2/ZEB1/TLR5/TNFAIP3/TNFRSF1A/TNXB/TRAF1/TRAF5/TWIST1/WNT10B/YWHAG/ZAP70/CA7/CACNA1E/PAX8/CXCR4/FZD5/RAB7A/CARD14/BCL2L14/TMEM204/NLRX1/RAB11FIP1/CALR/SLA2/CMAHP/NROB2/CDK10/RUNX1/TP63/RUNX3/IRS2/CRADD/FADD/TNFRSF11A/SPHK1/SKAP2/LIMD1/STARD13/PIAS2/MAP3K6/SYT7/RSAD2/CD8A/TRIP10/ADIPOQ/ARHGAP29/LY86/ARHGFE10/RAPGEF2/TELO2/IQSEC1/FGF19 | 197 |
| GO:0050793 | regulation of developmental process | 149/901 | 1953/17046 | 1.82E-06 | 0.00018 | 0.00014  | CDH3/PDPN/DMRT2/CELF1/TBR1/LECT1/CHI3L1/CCR1/SEZ6/ADM/FAM101A/CTGF/SMYD1/SH3D19/CYLD/ADRB3/BHLHA15/COCH/DIO3/DMBT1/EGR3/EIF4G1/UNC13D/EPHA1/EPHA3/ESR1/FGA/FGF10/VASH1/ACIN1/FOXC2/FOXO1/SPG20/EPB41L3/FLOT2/NEDD4L/ARHGFE18/MTOR/TENM4/GAS2/NPTN/BMP10/GNAS/GPER1/FLVCR1/SOX8/NRG1/HLA-B/HLA-DOA/HLX/HMGA1/ACACB/HOXB3/HOXB3/ID3/RSP02/BARHL2/IGF1/CYR61/IL1RN/IL6/INHBA/IRF1/ISL1/ITGA7/ITGB2/JUP/KDR/AMIGO3/HES5/LAMA3/LCK/ARHGDI/LGALS9/LMNA/SMAD3/MFI2/MITF/NEU1/NOV/NPPC/NRAS/NTF3/PALM/PARK2/LEF1/CEND1/ANGPT4/ATP8A2/PLA2G2A/PML/SSH1/FBLIM1/PALMD/LIMS2/PARVA/IFT122/PRKD1/MAP2K2/CDC42SE1/ERMN/PXN/BGLAP/CCL11/CCL17/SFRP2/VPS33A/BMP4/SLC8A1/BMPR1B/SLIT1/SOX9/STK3/SUPTG6H/ZEB1/TEAD3/TNFAIP3/TNFRSF1A/PHLDA2/TWIST1/CCR2/WNT10B/YWHAG/ZAP70/PAX8/CXCR4/LST1/ZC3H12A/CALR/COLQ/CAPZB/SCRT1/HOPX/TTBK1/IFITM1/GA57/SCIN/RUNX1/TP63/RUNX3/FADD/SPHK1/LIMD1/PIAS2/CBAF22/ADIPOQ/H2AFY/RAPGEF2/ULK2                                                                                                                                                                                                                                                                                                                          | 149 |
| GO:0098609 | cell-cell adhesion                  | 75/901  | 816/17046  | 1.87E-06 | 0.00018 | 0.00014  | CDH3/CDH9/CDH12/CDH13/PDPN/PKP3/FAT3/MAP3K8/CSTA/CYLD/DDOST/DSG3/EGFR/EGR3/FAT2/FGA/NFASC/FLOT2/MTOR/NPTN/GNAS/HLA-DOA/HLA-DPA1/HLA-E/HLX/ZC3H12D/IGF1/IGF2/CYR61/IL1RN/IL6/IRF1/ITGA7/ITGB2/ITGB7/JUP/AMIGO3/CDHR4/LCK/LCP1/LGALS9/SMAD3/NFATC3/NOV/LEF1/PIK3CG/PKHD1/IL20RB/APBB1P/FBLIM1/LIMS2/PARVA/PAG1/PCDHGC4/PCDHGB7/PCDHGB3/PCDHGA11/TENM2/NOD2/PCDH20/BMP4/SOX9/STK10/ZEB1/TNXB/CCR2/TNFRSF4/ZAP70/FZD5/SLA2/FADD/ESAM/RSA D2/CD8A/ADIPOQ                                                                                                                                                                                                                                                                                                                                                                                                                                                                                                                                                                                                                                                                                                                                                                                  | 75  |
| GO:0008219 | cell death                          | 140/901 | 1816/17046 | 2.27E-06 | 0.00021 | 0.00017  | C1D/GJB6/CHI3L1/EGLN2/CARD16/CIDEA/ANKRD9/COMP/MAP3K8/ADM/IL13RA/PARP4/CTGF/CYLD/DBB1/DNMT3A/DSG3/EGFR/EGR3/ESR1/FGA/FGF10/FHIT/ACIN1/FOXC2/FOXO1/EPB41L3/DIP2A/PPP1R13B/ARHGFE18/RYPB/RNF144B/GAS2/CLUL1/GLS2/BMP10/GPER1/GSTP1/GZMA/SOX8/NRG1/ANXA6/HSP90AB1/ID3/IGF1/CYR61/IL1RN/IL6/INHBA/IRF1/ISL1/ITGB2/KDR/LCK/ARHGDI/LGALS9/LMNA/SMAD3/MEF2D/MAP3K1/MEOX2/MPZ/NOV/NTF3/PFAH2/ARHGFE3/PARK2/UTP11L/LEF1/DDX47/ANGPT4/PIK3CG/PKHD1/PKM/PLAGL1/PLEC/PML/PPP2R2B/LIMS2/PRKD1/MAPK3/PROC/PSMB4/PAK6/PSMD7/PTGFR/PLEKHG5/MARK4/CCAR2/RASGRF2/SCT/NOD2/SFRP2/SGK1/BMP4/BMPR1B/BOK/SOX9/STK3/STK10/ACTC1/TERF1/TGM2/TNFAIP3/TNFRSF1A/TRAF1/TRAF5/PHLDA2/TWIST1/TNFRSF4/WNT10B/YWHAG/PAX8/CXCR4/FZD5/CARD14/BCL2L14/FAM188A/ZC3H12A/CPEB4/COL18A1/CLPTM1L/CALR/CAST/KDM2B/SCIN/TP63/RUNX3/IRS2/ACTN1/CRADD/FADD/ALDH1A2/SPHK1/MAP3K6/AURKB/DAPL1/ADIPOQ/LY86/RAPGEF2                                                                                                                                                                                                                                                                                                                                                                  | 140 |
| GO:0016265 | death                               | 140/901 | 1816/17046 | 2.27E-06 | 0.00021 | 0.00017  | C1D/GJB6/CHI3L1/EGLN2/CARD16/CIDEA/ANKRD9/COMP/MAP3K8/ADM/IL13RA/PARP4/CTGF/CYLD/DBB1/DNMT3A/DSG3/EGFR/EGR3/ESR1/FGA/FGF10/FHIT/ACIN1/FOXC2/FOXO1/EPB41L3/DIP2A/PPP1R13B/ARHGFE18/RYPB/RNF144B/GAS2/CLUL1/GLS2/BMP10/GPER1/GSTP1/GZMA/SOX8/NRG1/ANXA6/HSP90AB1/ID3/IGF1/CYR61/IL1RN/IL6/INHBA/IRF1/ISL1/ITGB2/KDR/LCK/ARHGDI/LGALS9/LMNA/SMAD3/MEF2D/MAP3K1/MEOX2/MPZ/NOV/NTF3/PFAH2/ARHGFE3/PARK2/UTP11L/LEF1/DDX47/ANGPT4/PIK3CG/PKHD1/PKM/PLAGL1/PLEC/PML/PPP2R2B/LIMS2/PRKD1/MAPK3/PROC/PSMB4/PAK6/PSMD7/PTGFR/PLEKHG5/MARK4/CCAR2/RASGRF2/SCT/NOD2/SFRP2/SGK1/BMP4/BMPR1B/BOK/SOX9/STK3/STK10/ACTC1/TERF1/TGM2/TNFAIP3/TNFRSF1A/TRAF1/TRAF5/PHLDA2/TWIST1/TNFRSF4/WNT10B/YWHAG/PAX8/CXCR4/FZD5/CARD14/BCL2L14/FAM188A/ZC3H12A/CPEB4/COL18A1/CLPTM1L/CALR/CAST/KDM2B/SCIN/TP63/RUNX3/IRS2/ACTN1/CRADD/FADD/ALDH1A2/SPHK1/MAP3K6/AURKB/DAPL1/ADIPOQ/LY86/RAPGEF2                                                                                                                                                                                                                                                                                                                                                                  | 140 |

|            |                                                         |         |            |          |         |         |                                                                                                                                                                                                                                                                                                                                                                                                                                                                                                                                                                                                                                                                                                                                                                                                                                                                                                                                                                                                                                                                                                                                                                                                                                                                                                                                                                                                                                                                                                                                                                                                                                                                                                                                                                                                                                                                                                                                                                                                                                                                                                                                                                                                                                                                                                                                                                                                                                                               |     |
|------------|---------------------------------------------------------|---------|------------|----------|---------|---------|---------------------------------------------------------------------------------------------------------------------------------------------------------------------------------------------------------------------------------------------------------------------------------------------------------------------------------------------------------------------------------------------------------------------------------------------------------------------------------------------------------------------------------------------------------------------------------------------------------------------------------------------------------------------------------------------------------------------------------------------------------------------------------------------------------------------------------------------------------------------------------------------------------------------------------------------------------------------------------------------------------------------------------------------------------------------------------------------------------------------------------------------------------------------------------------------------------------------------------------------------------------------------------------------------------------------------------------------------------------------------------------------------------------------------------------------------------------------------------------------------------------------------------------------------------------------------------------------------------------------------------------------------------------------------------------------------------------------------------------------------------------------------------------------------------------------------------------------------------------------------------------------------------------------------------------------------------------------------------------------------------------------------------------------------------------------------------------------------------------------------------------------------------------------------------------------------------------------------------------------------------------------------------------------------------------------------------------------------------------------------------------------------------------------------------------------------------------|-----|
| GO:0019722 | calcium-mediated signaling                              | 21/901  | 125/17046  | 2.32E-06 | 0.00021 | 0.00017 | CDH13/RCAN2/BHLHA15/DRD4/EGFR/NRG1/HPCA/IGF1/KDR/ATP1A2/NFATC3/MCTP2/PTGFR/TENM2/SLC8A1/ZAP70/CXCR4/SLA2/CASQ1/SPHK1/CD8A                                                                                                                                                                                                                                                                                                                                                                                                                                                                                                                                                                                                                                                                                                                                                                                                                                                                                                                                                                                                                                                                                                                                                                                                                                                                                                                                                                                                                                                                                                                                                                                                                                                                                                                                                                                                                                                                                                                                                                                                                                                                                                                                                                                                                                                                                                                                     | 21  |
| GO:0032720 | negative regulation of tumor necrosis factor production | 11/901  | 38/17046   | 2.73E-06 | 0.00025 | 0.00019 | CIDEA/GSTP1/LGALS9/POMC/TRIM27/NOD2/BPI/TNFAIP3/TWIST1/ZC3H12A/ADIPOQ                                                                                                                                                                                                                                                                                                                                                                                                                                                                                                                                                                                                                                                                                                                                                                                                                                                                                                                                                                                                                                                                                                                                                                                                                                                                                                                                                                                                                                                                                                                                                                                                                                                                                                                                                                                                                                                                                                                                                                                                                                                                                                                                                                                                                                                                                                                                                                                         | 11  |
| GO:0002376 | immune system process                                   | 175/901 | 2392/17046 | 2.76E-06 | 0.00025 | 0.00019 | ABI1/TANK/CD300LD/KLRG1/CDKN1C/SPON2/HCST/ADCY3/CHGA/CCR1/MAP3K8/ADM/IL131RA/CYLD/ESCO2/DDOST/RNF168/COCH/NLRP6/DMBT1/EEF2/EFNA2/EGFR/EGR3/A2M/EML1/UNC13D/FCGR2A/FGA/FGF10/RASA3/SBNO2/ACIN1/FOXO1/FOXO1/FLOT2/PUM2/MTOR/SLC37A4/FGF22/AMPD3/GNAS/GPER1/FFAR2/FLVCR1/GZMA/ANXA2/NRG1/HLA-B/HLA-DOA/HLA-DPA1/HLA-E/HLA-F/HLX/NR4A1/HOXB3/HRH1/HSP90AA1/HSP90AB1/ZC3H12D/CD300E/IGF1/IGF2/IL1R1/IL1RN/IL6/IL16/INHBA/IRF1/AQP9/ITGB2/ITGB7/KCNJ8/KDR/HES5/LCK/LCP1/LGALS9/LMO2/LTB/SMAD3/MAP3K1/MEOX1/MITF/MOV10/NFATC3/NOV/NRAS/OAS2/IL21R/LEF1/ANGPT4/PIK3CG/PITX2/PML/IL20RB/TLR9/TREM1/POU2AF1/APBB1P/HERC6/SMPD3/PRKAR1B/PAG1/PRKD1/MAPK3/MAP2K2/PROC/MASP1/HTRA1/PSMB4/PSMD7/PTPRE/RASGRF2/TRIM27/DEFB134/BGLAP/CCL11/CCL17/NOD2/TINAGL1/SFRP2/CXCR5/VPS33A/BMP4/SOX9/BPI/STAT3/STK3/STK10/SUPT6H/BST2/VAMP2/TCEA1/ZEB1/TLR5/TNFAIP3/CCR2/TNFRSF4/WNT10B/ZAP70/CA7/CXCR4/FZD5/RAB7A/LST1/NLRX1/ZC3H12A/C6orf25/CALR/UNC93B1/HIST1H3A/SLA2/IL1F10/IFITM1/SCIN/RUNX1/RUNX3/IRS2/ACTN1/FADD/TNFRSF11A/ENDOU/SKAP2/ESAM/SLC16A3/RSAD2/IL32/CD8A/ADIPOQ/LY86/NUP93/RAPGEF2/CD79A/FGF19                                                                                                                                                                                                                                                                                                                                                                                                                                                                                                                                                                                                                                                                                                                                                                                                                                                                                                                                                                                                                                                                                                                                                                                                                                                                                                                                                                        | 175 |
| GO:0019222 | regulation of metabolic process                         | 386/901 | 6084/17046 | 3.16E-06 | 0.00028 | 0.00022 | ABI1/CDH3/ZNF783/CDH13/MBNL2/FARP1/RCAN2/CDKN1C/C1D/ZBTB18/PIRDM1/DMRT2/CELF1/TBR1/NPFFR2/ADCY3/PNRC1/TMED10/HNRNPUL1/CHI3L1/ERLIN2/PSIP1/EGLN2/CARD16/ZBED9/CIDEA/CCR1/SLC51B/MAP3K8/ZFP42/ADM/IL131RA/ZNF358/LDLRAD3/CSTA/ZNF738/CTGF/SMYD1/SH3D19/CYLD/ADRB3/ESCO2/ZNF782/ZNF709/ZNF781/CITED4/RNF168/ZNF366/BHLHA15/NLRP6/DLG2/DNMT3A/DRD4/ECE1/EEF2/EGFR/EGR3/PATL2/EIF4G1/A2M/ELK4/EPHA1/EPHA3/ESR1/SPATA13/PHACTR1/SP8/FGA/FGF10/FHIT/XRN2/RASA3/PPM1E/SBNO2/TRAK1/MSRB2/ACIN1/FOXO1/FOXO2/TBC1D9B/FOXO1/SPG20/GGA3/DIP2A/FLOT2/TBC1D1/NEDD4L/PSD3/LARP1/PUM2/ARHGEF18/RYPB/MAPK8IP2/VGLL2/MTOR/GABBR1/RASGEF1C/RNF144B/ZNF549/ALS2CL/PNKD/RGS22/FBXO2/GAPDHS/PABP1/DNAJC2/FGF22/NPTN/DKK3/CYTH4/BMP10/ZNF638/GNAS/ZNF311/ZNF844/GPER1/DOK7/GRB10/ZBTB44/DNAJC15/GSTP1/GTF2B/BRF1/GUCY1A3/GZMA/ANXA2/SERPIND1/SOX8/NRG1/HK1/HLX/HMGA1/NR4A1/ACACB/HPCA/APBA2/HOXB3/HOXC4/HOXC5/HOXC6/HOXD3/AGFG2/HRH1/ACADL/HSP90AA1/HSP90AB1/TFAP2E/ID3/COL28A1/BARHL2/IGF1/IGF2/CYR61/IL1RN/IL6/IL16/FOKK2/INHBA/IRF1/ISL1/ITGB2/ITIH3/ITIH4/JUP/USP50/HILS1/KDR/KIF25/IPO5/HES5/AFF3/LCK/LDLR/ARHGDI1/LGALS9/LHCGR/LLGL1/LMNA/LMO2/LTB/SMAD3/MC2R/ME1/ME2/MEF2/MAP3K1/MEOX1/MEOX2/MFI2/MITF/LHX8/MOV10/PLEKHG7/NFATC3/NFYB/NHLH2/NOV/NPPC/NRAS/NTF3/OPRL1/PALM/ARHGFE3/PARK2/SPOCK3/LEF1/PRR16/ANGPT4/SIRT6/PGAM2/PI3/PIK3CG/PITX2/PKHD1/PLA2G2A/PLAGL1/PML/RIPPLY3/PNLP/RIPK4/TLR9/CYTL1/POMC/SSH1/RIN2/POU2AF1/BNC2/MED18/BANP/PPP1CB/PPP1CC/PIWIL2/ELP3/ARHGFE10L/PRMT6/DNAJC17/ZNF532/PPP2R2B/FANCI/CNOT11/VAC14/PRKAR1B/CISD1/PRKD1/MYNN/MAPK3/MAP2K2/MRAP/PRMT8/MASP1/HTRA1/SLAMF8/CDC42SE1/PSMB4/PAK6/ARNTL2/RGMA/PRDM11/P SMD7/PTGFR/PLEKHG5/TENM2/GATAD2B/METTL14/CCAR2/PXN/CREBZF/ACTA2/RASGRF2/TRIM27/RGS12/SCT/CCL11/CCL17/NPAS3/NOD2/SFRP2/ARHGAP9/TRA2B/GZF1/SGK1/BMP4/ZNF649/BMPR1B/BRD9/ZSCAN18/BOK/SOX9/STAT2/STK3/STK10/SUPT6H/BST2/TAF4B/TBP/TCEA1/TCEB2/ZEB1/ACTC1/TEAD3/TERF1/TIMP3/TLR5/TNFAIP3/TNFRSF1A/TNXB/TRAFF1/TRAFF5/PHLDA2/TWIST1/CCR2/TNFRSF4/UCP1/VARS/WNT10B/YWHAG/ZNF7/ZNF124/ZNF177/PAX8/CXCR4/FZD5/RAB7A/CARD14/ZNF665/ZC3H14/ZNF606/ZC3H12A/CPBE4/ZNF436/CALR/SLIRP/CAST/SH3BGR3/SCRT1/HIST1H3A/SLA2/ZNF397/NR0B2/HOPX/SPINK7/TRIM63/KDM2B/LOXL3/CBX2/GAS7/CDK10/RUNX1/TP63/RUNX3/SERPI NA6/IRS2/ACTN1/CRADD/FADD/TNFRSF11A/ALDH1A2/SPHK1/BUD31/CCNA1/LIMD1/ERI1/STARD13/PIAS2/ZFAND2A/MAP3K6/LDB2/CBFA2T2/AURKB/DAPL1/ADIPOQ/ARHGAP29/H2AFY/ARHGFE10/MICAL2/N4BP1/VGLL4/RAPGEF2/ULK2/USP6NL/ZBTB39/RABGAP1/IQSEC1/FGF19/NR1H4 | 386 |
| GO:0032989 | cellular component morphogenesis                        | 115/901 | 1432/17046 | 3.19E-06 | 0.00028 | 0.00022 | ABI1/FARP1/SPON2/PDPN/TBR1/LECT1/FRMD6/CNP/COL9A3/SCLT1/SH3D19/CYLD/COCH/EFNA2/EGFR/TMEM17/UNC13D/EPHA1/EPHA3/EPHB4/FGA/FGF10/RASA3/BTBD3/SPG20/NFASC/EPB41L3/FLNB/NEDD4L/ARHGFE18/MAPK8IP2/TENM4/GAS2/FGF22/BMP10/TMOD4/NRG1/HSP90AA1/HSP90AB1/FMN1/BARHL2/IL6/ISL1/ITGA7/ITGB2/ITGB7/KDR/STMN1/ARHGDI1/LLGL1/SMAD3/MAP3K1/MFI2/MYL2/NRAS/NTF3/PALM/PARK2/LEF1/ATP8A2/PKHD1/SSH1/FBLIM1/PALMD/PARVA/IFT122/BIN3/MAPK3/MAP2K2/CDC42SE1/PSMB4/RGMA/TRPC7/PSMD7/TENM2/ERMN/PXN/RASGRF2/S100A4/S100A6/CCL11/SFRP2/DNAI2/SGK1/TMEM237/VPS33A/BMP4/BMPR1B/SLIT1/SOX9/ACTC1/TRPC4/TRPC6/TWIST1/CACNB2/PAX8/LST1/C6orf25/COL18A1/CALR/SLIRP/CAP2B/ANTXR1/CASQ1/PARD6B/TTBK1/LOXL3/GAS7/RUNX3/IRS2/ACTN1/LIMD1/RAPGEF2/ULK2/FGF19                                                                                                                                                                                                                                                                                                                                                                                                                                                                                                                                                                                                                                                                                                                                                                                                                                                                                                                                                                                                                                                                                                                                                                                                                                                                                                                                                                                                                                                                                                                                                                                                                                                                                                                                     | 115 |
| GO:0030036 | actin cytoskeleton organization                         | 52/901  | 511/17046  | 4.53E-06 | 0.00038 | 0.0003  | ABI1/FAM101A/CTGF/EPHA1/EPHA3/PHACTR1/FGF10/PPM1E/MSRB2/LIMCH1/EPB41L3/FLNB/ARHGFE18/MTOR/PLEK2/BMP10/TMOD4/FMN1/LCP1/LLGL1/SMAD3/MAP3K1/MYL2/NEDD9/NTF3/PARK2/SSH1/PARVA/TTC17/BIN3/PAK6/ACTR3B/ERMN/TRIM27/CCL11/PARVG/MICAL1/BST2/ACTC1/TNXB/CALR/CAP2B/SH3BGR3/ANTXR1/CASQ1/GAS7/SCIN/ACTN1/TRIP10/ARHGFE10/MICAL2/IQSEC1                                                                                                                                                                                                                                                                                                                                                                                                                                                                                                                                                                                                                                                                                                                                                                                                                                                                                                                                                                                                                                                                                                                                                                                                                                                                                                                                                                                                                                                                                                                                                                                                                                                                                                                                                                                                                                                                                                                                                                                                                                                                                                                                 | 52  |
| GO:0035556 | intracellular signal transduction                       | 179/901 | 2478/17046 | 4.58E-06 | 0.00038 | 0.0003  | ABI1/TANK/CDH13/FARP1/RCAN2/MRVI1/HCST/NPFFR2/ADCY3/CHI3L1/CCR1/SEZ6/TNFAIP81/MAP3K8/ADM/IL131RA/MIB2/CTGF/SGOL1/PPM1L/CYLD/ADRB3/BHLHA15/NLRP6/DRD4/EGFR/A2M/ESR1/SPATA13/FGA/FGF10/FHIT/RASA3/FOXO1/AKR1B1/RHOBTB2/PSD3/LARP1/PPP1R13B/PUM2/ARHGFE18/MAPK8IP2/TSSK2/MTOR/RASGEF1C/ALS2CL/ACOT11/PLEK2/FGF22/SDCBP2/CYTH4/BMP10/GNAS/GPER1/GSTP1/GUCY1A3/NRG1/NR4A1/HPCA/HRH1/HTR5A/IGF1/IGF2/CYR61/IL1RN/IL6/INHBA/ISL1/KCNH2/KDR/HES5/STMN1/LCK/LCP1/ARHGDI1/LGALS9/LHCGR/RAB19/SMAD3/MAP3K1/MOV10/PLEKHG7/ATP1A2/NFATC3/NOV/NRAS/NTF3/ARHGFE3/PARK2/PDE7A/PIK3CG/PKHD1/PLA2G2A/PRKAG3/PML/TLR9/TREM1/RIN2/ZDHHC13/PPP1CB/PPP1CC/ARHGFE10L/MOB1A/IFT122/MCTP2/LIMBRD1/PAG1/PRKD1/WBS2/MAPK3/MAP2K2/PSMB4/PAK6/PSMD7/PTGFR/PLEKHG5/TENM2/CCAR2/PXN/RASGRF2/RGS12/RIT2/S100A4/CCL11/CCL17/NOD2/SFRP2/ARHGAP9/SGK1/BMP4/SLC8A1/BOK/SOX9/STAT2/STK3/STK10/BST2/TEAD3/TNFAIP3/TNFRSF1A/TNXB/TRAFF5/TWIST1/CCR2/YWHAG/ZAP70/CXCR4/FZD5/RAB7A/CARD14/NLRX1/CAPS/HIST1H3A/SLA2/CASQ1/IFITM1/CDK10/TP63/IRS2/CRADD/FADD/TNFRSF11A/SPHK1/LIMD1/PRC1/STARD13/MAP3K6/AURKB/CD8A/TRIP10/ADIPOQ/ARHGAP29/RAB3D/RAB36/ARHGFE10/RAPGEF2/TELO2/IQSEC1/FGF19                                                                                                                                                                                                                                                                                                                                                                                                                                                                                                                                                                                                                                                                                                                                                                                                                                                                                                                                                                                                                                                                                                                                                                                                                                                                                                                 | 179 |

|            |                                                                              |         |            |          |         |         |                                                                                                                                                                                                                                                                                                                                                                                                                                                                                                                                                                                                                                                                                                                                                                                                                                                                                                                                                                                                |     |
|------------|------------------------------------------------------------------------------|---------|------------|----------|---------|---------|------------------------------------------------------------------------------------------------------------------------------------------------------------------------------------------------------------------------------------------------------------------------------------------------------------------------------------------------------------------------------------------------------------------------------------------------------------------------------------------------------------------------------------------------------------------------------------------------------------------------------------------------------------------------------------------------------------------------------------------------------------------------------------------------------------------------------------------------------------------------------------------------------------------------------------------------------------------------------------------------|-----|
| GO:1903556 | negative regulation of tumor necrosis factor superfamily cytokine production | 11/901  | 40/17046   | 4.76E-06 | 0.00039 | 0.0003  | CIDEA/GSTP1/LGALS9/POMC/TRIM27/NOD2/BPI/TNFAIP3/TWIST1/ZC3H12A/ADIPOQ                                                                                                                                                                                                                                                                                                                                                                                                                                                                                                                                                                                                                                                                                                                                                                                                                                                                                                                          | 11  |
| GO:0048646 | anatomical structure formation involved in morphogenesis                     | 92/901  | 1090/17046 | 4.76E-06 | 0.00039 | 0.0003  | ABI1/CDH13/PDPN/DMRT2/TBR1/LECT1/ESM1/CHI3L1/COL11A1/SCLT1/ADM/CTGF/CYLD/EGR3/TMEM17/UNC13D/EPHA1/EPHB4/FGF10/VASH1/SBNO2/FOXC2/NFASC/EPB41L3/TENM4/BMP10/GNAS/TMOD4/ANXA2/SOX8/NR4A1/HOXB3/FMN1/CYR61/IL6/INHBA/ISL1/ITGA7/ITGB2/KDR/HES5/LAMA3/SMAD3/MEOX1/MEOX2/MYL2/NFATC3/NOV/ATP5B/LEF1/CEND1/ANGPT4/ATP8A2/PIK3CG/PITX2/PKHD1/PML/ROBO4/PARVA/IFT122/PRKD1/MAPK3/MAP2K2/HTRA1/CCL11/STRA6/SFRP2/DNAI2/TMEM237/VPS33A/BMP4/SOX9/STK3/ACTC1/TGM2/TNFAIP3/TWIST1/CCR2/WNT10B/PAX8/FZD5/ZC3H12A/C6orf25/COL18A1/CAST/CASQ1/HOPX/KDM2B/RUNX1/TP63/ACTN1/SPHK1                                                                                                                                                                                                                                                                                                                                                                                                                                | 92  |
| GO:0032680 | regulation of tumor necrosis factor production                               | 17/901  | 91/17046   | 4.82E-06 | 0.00039 | 0.0003  | SPON2/CIDEA/GSTP1/HLA-E/ISL1/LGALS9/TLR9/POMC/TRIM27/NOD2/BPI/TNFAIP3/TWIST1/CCR2/ZC3H12A/FADD/ADIPOQ                                                                                                                                                                                                                                                                                                                                                                                                                                                                                                                                                                                                                                                                                                                                                                                                                                                                                          | 17  |
| GO:0032879 | regulation of localization                                                   | 159/901 | 2151/17046 | 4.94E-06 | 0.00039 | 0.00031 | CDH3/CDH13/TRDN/PDPN/TBR1/RER1/CHGA/CIDEA/CCR1/SLC51B/CYLD/FITM1/TRPV3/NLRP6/ABAT/DRD4/EGFR/UNC13D/EPHA1/SPATA13/FGA/FGF10/VASH1/FOXC2/EXPH5/MLC1/TBC1D1/NUP210/NEDD4L/MAPK8IP2/MTOR/GLS2/VPS4A/BMP10/GNAS/CRACR2B/GPR26/GPER1/FFAR2/GRB10/ANXA2/HAS1/KCNIP2/NRG1/ANXA13/HLA-E/ACACB/HPCA/HSPA1L/HSP90AB1/IGF1/CYR61/IL1RN/IL6/INHBA/ISL1/JUP/KCNH2/KCNJ8/KCNJ9/KDR/PO5/LAMA3/STMN1/LCK/LCP1/LGALS9/LLGL1/LMNA/SMAD3/MCC/MAP3K1/ATP1A2/NFATC3/NOV/NTF3/OPRL1/P2RY6/PARK2/LEF1/ANGPT4/PDE4C/SIRT6/ATP8A2/PIK3CG/PITX2/PKHD1/PML/FXYD6/TLR9/POMC/PON1/ROBO4/ELP3/GOLPH3L/TRPV6/SMPD3/SLC30A10/SYBU/PRKAR1B/LMBRD1/PRKD1/MAPK3/MAP2K2/FAM60A/RASGRF2/TRIM27/SCT/CCL11/NOD2/SFRP2/SGK1/BMP4/SLC8A1/SLC9A3/SOX9/STK10/SUPT6H/BS2/VAMP2/TRPC6/PHLDA2/TWIST1/CCR2/TNFRSF4/YWHAG/CA7/CACNA1E/PTP4A1/CACNB2/PAX8/FZD5/RAB7A/ZC3H12A/RAB11FIP1/COL18A1/CALR/SH3BGR3/SCRT1/NROB2/CASQ1/PARD6B/RAE1/IFITM1/SCIN/IRS2/ACTN1/FADD/TNFRSF11A/SPHK1/SYT7/RSAD2/REEP6/ADIPOQ/RAB3D/NUP93/RAPGEF2/RABGAP1L/FGF19 | 159 |
| GO:0061061 | muscle structure development                                                 | 55/901  | 554/17046  | 5.05E-06 | 0.0004  | 0.00031 | SPEG/ZBTB18/CHRNA1/COL11A1/ADM/SMYD1/BHLHA15/EGR3/FGF10/FOXC2/FLNB/FLOT2/SYNE1/VGLL2/MTOR/BMP10/TMOD4/SOX8/NRG1/HLX/ID3/IGF1/IGF2/IL6/ISL1/ITGA7/LMNA/SMAD3/MEF2D/MEOX2/MYL2/NFATC3/NOV/NRAS/NTF3/LEF1/SIRT6/PITX2/PLAGL1/BIN3/CCL17/STRA6/BMP4/SLC8A1/SOX9/SUPT6H/ZEB1/ACTC1/TWIST1/WNT10B/TMEM204/CALR/CAST/CASQ1/HOPX                                                                                                                                                                                                                                                                                                                                                                                                                                                                                                                                                                                                                                                                       | 55  |
| GO:0009887 | organ morphogenesis                                                          | 78/901  | 884/17046  | 5.38E-06 | 0.00042 | 0.00033 | TBR1/GJB6/COL11A1/COMP/ADM/FAM101A/CTGF/EGFR/EPHB4/ESR1/FGF10/FOX1/FOX2/BMP10/GNAS/FLVCR1/SOX8/NRG1/HLX/HOXB3/HOXC4/HOXD3/ID3/RSPO2/FMN1/IGF1/IGF2/CYR61/IL6/AQP5/INHBA/ISL1/HES5/SMAD3/MEF2D/LHX8/MYL2/NPPC/LEF1/SIRT6/ATP8A2/PITX2/PML/BNC2/CHRNA9/LIMS2/PARVA/IFT122/CSGALNACT1/MAPK3/MAP2K2/HTRA1/ACTA2/BGLAP/CCL11/STRA6/SFRP2/GZF1/BMP4/SLC8A1/BMPR1B/SLIT1/SOX9/ZEB1/ACTC1/TGM2/TLE3/TNFAIP3/PHLDA2/TWIST1/WNT10B/PAX8/FZD5/COL18A1/KDM2B/TP63/ALDH1A2/MICAL2                                                                                                                                                                                                                                                                                                                                                                                                                                                                                                                           | 78  |
| GO:0008360 | regulation of cell shape                                                     | 21/901  | 132/17046  | 5.66E-06 | 0.00043 | 0.00034 | PDPN/COCH/EPB41L3/ARHGFE18/GAS2/IL6/ITGA7/ITGB2/KDR/PALM/FBLIM1/PALMD/PARVA/CDC42SE1/ERMN/PXN/CCL11/LST1/TTBK1/GAS7/LIMD1                                                                                                                                                                                                                                                                                                                                                                                                                                                                                                                                                                                                                                                                                                                                                                                                                                                                      | 21  |
| GO:0032640 | tumor necrosis factor production                                             | 17/901  | 93/17046   | 6.54E-06 | 0.00049 | 0.00038 | SPON2/CIDEA/GSTP1/HLA-E/ISL1/LGALS9/TLR9/POMC/TRIM27/NOD2/BPI/TNFAIP3/TWIST1/CCR2/ZC3H12A/FADD/ADIPOQ                                                                                                                                                                                                                                                                                                                                                                                                                                                                                                                                                                                                                                                                                                                                                                                                                                                                                          | 17  |
| GO:0016337 | single organismal cell-cell adhesion                                         | 62/901  | 657/17046  | 6.57E-06 | 0.00049 | 0.00038 | CDH3/CDH9/PDPN/PKP3/MAP3K8/CSTA/CYLD/DDOST/EGFR/EGR3/FGA/NFASC/FLOT2/MTOR/GNAS/HLA-DOA/HLA-DPA1/HLA-E/HLX/ZC3H12D/IGF1/IGF2/CYR61/IL1RN/IL6/IRF1/ITGA7/ITGB2/ITGB7/JUP/LCK/LCP1/LGALS9/SMAD3/NFATC3/NOV/LEF1/PIK3CG/PKHD1/IL20RB/APBB1IP/FBLIM1/LIMS2/PARVA/PAG1/TENM2/NOD2/BMP4/SOX9/STK10/ZEB1/TNFB/CCR2/TNFRSF4/ZAP70/FZD5/SLA2/FADD/ESAM/RSAD2/CD8A/ADIPOQ                                                                                                                                                                                                                                                                                                                                                                                                                                                                                                                                                                                                                                 | 62  |
| GO:0043067 | regulation of programmed cell death                                          | 106/901 | 1314/17046 | 6.64E-06 | 0.00049 | 0.00038 | EGLN2/CARD16/CIDEA/ANKRD9/COMP/MAP3K8/ADM/IL31RA/CTGF/CYLD/DBB1/EGFR/EGR3/ESR1/FGA/FGF10/ACIN1/FOXC2/FOXO1/DIP2A/ARHGFE18/SL2/BMP10/GPER1/GS1P1/GZMA/SOX8/NRG1/HSP90AB1/ID3/IGF1/CYR61/IL1RN/IL6/INHBA/ISL1/KDR/LCK/ARHGDI1/LGALS9/LMNA/SMAD3/MAP3K1/MITF/MPZ/NTF3/PAFAH2/ARHGFE3/PARK2/UTP11L/LEF1/ANGPT4/PIK3CG/PKHD1/PML/LIMS2/PROC/PSMB4/PAK6/PSMD7/PTGFR/PLEKHG5/MARK4/CCAR2/RASGRF2/SCT/NOD2/SFRP2/SGK1/BMP4/BMPR1B/BOK/SOX9/STK3/STK10/ACTC1/TERF1/TGM2/TNFAIP3/TRA1/TRA5/TWIST1/TNFRSF4/WNT10B/YWHAG/PAX8/CARD14/BCL2L14/CPEBA/COL18A1/CALR/CAST/KDM2B/SCIN/TP63/RUNX3/IRS2/ACTN1/CRADD/FADD/ALDH1A2/SPHK1/MAP3K6/AURKB/ADIPOQ/RAPGEF2                                                                                                                                                                                                                                                                                                                                                 | 106 |
| GO:0008283 | cell proliferation                                                           | 135/901 | 1775/17046 | 7.16E-06 | 0.00052 | 0.00041 | ABI1/CDH3/CDH13/CDKN1C/SPEG/TCIRG1/TACC2/PDPN/GJB6/LECT1/ESM1/B4GALT7/PDAP1/ADM/IL31RA/CTGF/DMBT1/DPH1/EGFR/EGR3/EML1/EPHA1/ESR1/FGF10/VASH1/FOXC2/FOXO1/AKR1B1/LARP1/MORC3/MTOR/TENM4/FBXO2/BMP10/GPER1/GSTP1/ANXA2/SOX8/NRG1/HLA-DPA1/HLA-E/HLX/HMGA1/NR4A1/TFAP2E/ZC3H12D/IGF1/IGF2/CYR61/IL6/IL12RB2/IL15RA/INHBA/IRF1/ISL1/ITGB2/JUP/KDR/HES5/LCK/LGALS9/SMAD3/MCC/MITF/NEU1/NOV/NPPC/NRAS/NTF3/LEF1/CEND1/SIRT6/ATP8A2/PIK3CG/PITX2/PKHD1/PLA2G2A/PML/RIPPLY3/IL20RB/CN0T11/LIMS2/IFT122/CSGALNACT1/PRKD1/MAP2K2/PRKRIR/HTRA1/SLURP1/PTGFR/TMEM27/RPA3/S100A6/CCL11/NOD2/SFRP2/SGK1/BMP4/BMPR1B/BOK/SOX9/STK3/BST2/ZEB1/TNFAIP3/TRA5/TWIST1/CCR2/TNFRSF4/WNT10B/ZAP70/FZD5/LST1/COL18A1/CALR/RETNLB/KDM2B/IFITM1/SCIN/CDK10/RUNX1/TP63/RUNX3/IRS2/FADD/TNFRSF11A/ALDH1A2/SPHK1/SKAP2/PRC1/ADIPOQ/LY86/RAPGEF2/CD79A/FGF19                                                                                                                                                                | 135 |

|            |                                                                     |         |            |          |         |         |                                                                                                                                                                                                                                                                                                                                                                                                                                                                                                                                                                                                                                                                                                                                                                                                                                                                                                                                                                                                                                                                                                                                                                                                                                                                                                                                                                                                                                                                                                                                                                                                                                                                  |     |
|------------|---------------------------------------------------------------------|---------|------------|----------|---------|---------|------------------------------------------------------------------------------------------------------------------------------------------------------------------------------------------------------------------------------------------------------------------------------------------------------------------------------------------------------------------------------------------------------------------------------------------------------------------------------------------------------------------------------------------------------------------------------------------------------------------------------------------------------------------------------------------------------------------------------------------------------------------------------------------------------------------------------------------------------------------------------------------------------------------------------------------------------------------------------------------------------------------------------------------------------------------------------------------------------------------------------------------------------------------------------------------------------------------------------------------------------------------------------------------------------------------------------------------------------------------------------------------------------------------------------------------------------------------------------------------------------------------------------------------------------------------------------------------------------------------------------------------------------------------|-----|
| GO:0030029 | actin filament-based process                                        | 55/901  | 561/17046  | 7.31E-06 | 0.00052 | 0.00041 | ABI1/FRMD6/FAM101A/CTGF/EPHA1/EPHA3/PHACTR1/FGF10/PPM1E/MSRB2/LIMCH1/EPB41L3/FLNB/ARHGFE18/MTOR/PLEK2/BMP10/TMOD4/FMN1/LCP1/LLGL1/SMAD3/MAP3K1/MYH4/MYL2/NEDD9/ATP1A2/NTF3/PARK2/SSH1/PARVA/TTCC17/BIN3/PAK6/ACTR3B/ERMN/TRIM27/CCL11/PARVG/MICAL1/BST2/ACTC1/TNXB/CALR/CAPZB/SH3BGL3/ANRXR1/CASQ1/GAS7/SCIN/ACTN1/TRIP10/ARHGFE10/MICAL2/IQSEC1                                                                                                                                                                                                                                                                                                                                                                                                                                                                                                                                                                                                                                                                                                                                                                                                                                                                                                                                                                                                                                                                                                                                                                                                                                                                                                                 | 55  |
| GO:1903555 | regulation of tumor necrosis factor superfamily cytokine production | 17/901  | 94/17046   | 7.60E-06 | 0.00054 | 0.00042 | SPON2/CIDEA/GSTP1/HLA-E/ISL1/LGALS9/TLR9/POMC/TRIM27/NOD2/BPI/TNFAIP3/TWIST1/CCR2/ZC3H12A/FADD/ADIPOQ                                                                                                                                                                                                                                                                                                                                                                                                                                                                                                                                                                                                                                                                                                                                                                                                                                                                                                                                                                                                                                                                                                                                                                                                                                                                                                                                                                                                                                                                                                                                                            | 17  |
| GO:0042221 | response to chemical                                                | 260/901 | 3882/17046 | 7.65E-06 | 0.00054 | 0.00042 | CDH3/CDH13/KCNMB2/CDKN1C/TCIRG1/SPON2/TBR1/GJB6/NPFFR2/ADCY3/TMED10/LECT1/CHGA/CHI3L1/ERLIN2/EGLN2/CHRNA1/CHRNA2/CHRNA5/CIDEA/AP3S1/CCR1/CNP/ COL9A3/ADM/IL131RA/OR2A14/CP51/TRPM6/PARP4/CTGF/ADRB3/CYP11A1/CITED4/DDOST/ZNF366/BHLHA15/DNMT3A/ABAT/DRD4/AGXT/EFNA2/EGFR/EGR3/EIF4G1/EPHA1/E PHA3/EPHB4/ESR1/FGA/FGF10/RASA3/PPM1E/SBNO2/FOXO2/FOXO1/AKR1B1/SPG20/NFASC/FLNB/MLC1/NUP210/NEDD4L/ARHGFE18/MTOR/STEAP2/FBXO2/GATM/GJA3/FGF2 2/NPTN/GJB2/BMP10/GNAS/GPER1/FFAR2/GRB10/GSTP1/GUCY1A3/HAS1/SERPIND1/KCNIP2/NRG1/HLA-B/HLA-DPA1/HLA-E/HLA-F/NR4A1/HPCA/HRH1/HSD17B2/HSPA1L/HSP90AA1/HSP90AB1/HTR3A/HTR5A/IGF2/CYR61/LCE1D/IL1R1/IL1RN/IL6/IL10RA/AQP2/IL11RA/IL12RB2/IL15RA/IL16/INHBA/IRF1/AQP 9/ISL1/ITGB2/ITIH4/JUP/KCNH2/KCNJ8/KCNMB1/KDR/ACAT1/PO5/HES5/AFF3/OR2A5/LCK/ARHGDI1/LGALS9/LHCGR/LMNA/LMO2/LOX/LTB/LTBP1/SMAD3/ME1/MAP3K1/MOV 10/MT1A/ATP1A2/NFATC3/NOV/NPPC/NRAS/NTF3/OAS2/OPRL1/OR2C1/OR3A2/SLC22A18/P2RY6/IL21R/ARHGFE3/PARK2/LEF1/ANGPT4/PGAM2/PIK3CG/PITX2/PKM/PRKAG3/P ML/IL20RB/TLR9/TREM1/SSH1/PON1/CYP2W1/PPP1CB/PPP1CC/SLC47A1/SLC30A10/CHRNA9/SYBU/PARVA/PRKAR1B/LMBRD1/PRKD1/MAPK3/MAP2K2/HTRA1/SLAMF8/PSMB4/ RGMAT/TRPC7/PSMD7/PTGFR/PLEKHG5/TENM2/PTPRE/PXN/RASGRF2/RIT2/BGLAP/CCL11/CCL17/NOD2/SFRP2/CXCR5/BMP4/SLC8A1/SLC9A3/BMPR1B/SLIT1/SOX9/SRP68/STAT2 /BST2/VAMP2/TCEB2/ZEB1/ACTC1/TERF1/TIMP3/TLR5/TNFAIP3/TNFRSF1A/TRPC4/TRPC6/TRPM2/TWIST1/CCR2/TNFRSF4/WNT10B/CACNA1E/CACNB2/PAX8/CXCR4/FZD5/RAB7 A/CARD14/TMEM204/ZC3H12A/CPEB4/COL18A1/CALR/NROB2/CASQ1/IL1F10/TRIM63/MGARP/RAE1/IFITM1/RUNX1/RUNX3/IRS2/FADD/TNFRSF11A/ALDH1A2/SPHK1/HSPB3/CC RL2/ZFAND2A/RSAD2/ADIPOQ/LY86/MTL5/NUP93/RAPGEF2/FGF19/NR1H4 | 260 |
| GO:0048523 | negative regulation of cellular process                             | 257/901 | 3831/17046 | 7.85E-06 | 0.00054 | 0.00043 | ABI1/CDH13/FARP1/CDKN1C/SPEG/TRDN/C1D/ZBTB18/CELFL1/GJB6/LECT1/CHGA/ERLIN2/B4GALT7/CARD16/CIDEA/ANKRD9/SEZ6/TNFAIP81/COMP/ADM/IL131RA/HUS1B/FAM1 01A/APCDD1/CSTA/CTGF/SMYD1/CYLD/DBB1/RNF168/ZNF366/BHLHA15/NLRP6/DLG2/DNMT3A/DRD4/EGFR/EGR3/PATL2/A2M/ELK4/EPHA1/ESR1/FGA/FGF10/FHIT/RASA3/PP M1E/VASH1/SBNO2/ACIN1/FOXO2/FOXO1/SPG20/NEDD4L/PPP1R13B/RYPB/MORC3/MTOR/GABBR1/RGS22/GAS2/FBXO2/SACS/PABPC1/DNAJC2/DKK3/VPS4A/BMP10/GPER1/G RB10/DNAJC15/GSTP1/TMOD4/GPR132/GZMA/ANXA2/HAS1/SERPIND1/SOX8/NRG1/ANXA13/HLX/HMGA1/NR4A1/ACACB/HPCA/HOXB3/HOXC6/ACADL/HSP90AB1/ID3/ZC3H12 D/COL28A1/IGF1/CYR61/IL1RN/IL6/INHBA/IRF1/ISL1/ITIH3/ITIH4/HILS1/KCNH2/KDR/KIF25/HES5/STMN1/LCK/ARHGDI1/LGALS9/LMNA/LTBP1/SMAD3/MCC/MF12/MITF/MPZ/MY L2/NUBP1/ATP1A2/NOV/NPPC/NTF3/OPRL1/PAFAH2/ATP5B/PALM/PARK2/SPOCK3/LEF1/CEND1/ANGPT4/PDE4C/SIRT6/ATP8A2/PI3/PIK3CG/PITX2/PKHD1/PLA2G2A/PLAGL1/PR KAG3/PML/RIPPLY3/IL20RB/TLR9/PPP1CB/PPP1CC/PRMT6/DNAJC17/FANCI/LIMS2/PRKAR1B/IFT122/LMBRD1/PAG1/PRKD1/PRKRIR/PROC/MASP1/HTRA1/PSMB4/PSMD7/SLURP 1/PTGFR/TENM2/GATAD2B/METTL14/CCAR2/PTPRE/CREBZF/FAM60A/TRIM27/RGS12/SCT/CCL17/NOD2/SFRP2/GZF1/BMP4/ZNF649/SLC8A1/BMPR1B/SLIT1/SOX9/BPI/STK3/SU PT6H/BST2/TBP/ZEB1/ACTC1/TERF1/TIMP3/TNFAIP3/TWIST1/CCR2/TNFRSF4/WNT10B/YWHAG/ZNF177/PAX8/FZD5/RAB7A/CARD14/LST1/NLRX1/ZC3H14/ZC3H12A/RAB11FIP1/ CPEB4/COL18A1/CALR/SLIRP/CAST/CAPZB/SCRT1/HIST1H3A/SLA2/NROB2/CASQ1/HOPX/SPINK7/KDM2B/LOXL3/CBX2/IFITM1/GAS7/SCIN/CDK10/RUNX1/TP63/RUNX3/SERPINA6/ IRS2/ACTN1/CRADD/FADD/ALDH1A2/SPHK1/SKAP2/LIMD1/PIAS2/CBFA2T2/RSAD2/AURKB/DAPL1/ADIPOQ/H2AFY/N4BP1/RAPGEF2/ULK2/FGF19/NR1H4                                      | 257 |
| GO:0042981 | regulation of apoptotic process                                     | 105/901 | 1305/17046 | 8.25E-06 | 0.00056 | 0.00044 | EGLN2/CARD16/CIDEA/ANKRD9/COMP/MAP3K8/ADM/IL131RA/CTGF/CYLD/DBB1/EGFR/EGR3/ESR1/FGA/FGF10/ACIN1/FOXO2/FOXO1/DIP2A/ARHGFE18/GLS2/BMP10/GPER1/GS TP1/GZMA/SOX8/NRG1/HSP90AB1/ID3/IGF1/CYR61/IL1RN/IL6/INHBA/ISL1/KDR/LCK/ARHGDI1/LGALS9/LMNA/SMAD3/MAP3K1/MITF/MPZ/NTF3/PAFAH2/ARHGFE3/PARK2/UTP 11L/LEF1/ANGPT4/PIK3CG/PKHD1/PML/LIMS2/PROC/PSMB4/PAK6/PSMD7/PTGFR/PLEKHG5/CCAR2/RASGRF2/SCT/NOD2/SFRP2/SGK1/BMP4/BMPR1B/BOK/SOX9/STK3/STK10/A CTC1/TERF1/TGM2/TNFAIP3/TRA1/TRA5/TWIST1/TNFRSF4/WNT10B/YWHAG/PAX8/CARD14/BCL2L14/CPEB4/COL18A1/CALR/CAST/KDM2B/SCIN/TP63/RUNX3/IRS2/ACTN1/CR ADD/FADD/ALDH1A2/SPHK1/MAP3K6/AURKB/ADIPOQ/RAPGEF2                                                                                                                                                                                                                                                                                                                                                                                                                                                                                                                                                                                                                                                                                                                                                                                                                                                                                                                                                                                                                   | 105 |
| GO:0000902 | cell morphogenesis                                                  | 108/901 | 1352/17046 | 8.33E-06 | 0.00056 | 0.00044 | ABI1/FARP1/SPON2/PDPN/TBR1/LECT1/FRMD6/CNP/COL9A3/SCLT1/SH3D19/CYLD/COCH/EFNA2/EGFR/TMEM17/UNC13D/EPHA1/EPHA3/EPHB4/FGA/FGF10/RASA3/BTBD3/SPG 20/NFASC/EPB41L3/FLNB/NEDD4L/ARHGFE18/MAPK8IP2/GAS2/FGF22/NRG1/HSP90AA1/HSP90AB1/FMN1/BARHL2/IL6/ISL1/ITGA7/ITGB2/ITGB7/KDR/STMN1/ARHGDI1/LLGL1/S MAD3/MAP3K1/MF12/NRAS/NTF3/PALM/PARK2/LEF1/ATP8A2/PKHD1/SSH1/FBLIM1/PALMD/PARVA/IFT122/BIN3/MAPK3/MAP2K2/CDC42SE1/PSMB4/RGMA/TRPC7/PSMD7/TE NM2/ERMN/PXN/RASGRF2/S100A4/S100A6/CCL11/SFRP2/DNAI2/SGK1/TMEM237/VPS33A/BMP4/BMPR1B/SLIT1/SOX9/TRPC4/TRPC6/TWIST1/CACNB2/PAX8/LST1/C6orf25/COL 18A1/CALR/CAPZB/ANTXR1/PARD6B/TBKB1/LOXL3/GAS7/RUNX3/IRS2/ACTN1/LIMD1/RAPGEF2/ULK2/FGF19                                                                                                                                                                                                                                                                                                                                                                                                                                                                                                                                                                                                                                                                                                                                                                                                                                                                                                                                                                             | 108 |
| GO:0030334 | regulation of cell migration                                        | 55/901  | 568/17046  | 1.05E-05 | 0.0007  | 0.00055 | CDH13/CCR1/EGFR/EPHA1/SPATA13/FGF10/VASH1/FOXO2/BMP10/GPER1/HAS1/IGF1/CYR61/IL1RN/IL6/KDR/LAMA3/LGALS9/LMNA/SMAD3/MCC/MAP3K1/NOV/NTF3/P2RY6/LE F1/ANGPT4/PITX2/ROBO4/ELP3/PRKD1/FAM60A/CCL11/NOD2/SFRP2/SGK1/BMP4/SLC8A1/SOX9/STK10/BST2/PHLDA2/CCR2/PTP4A1/COL18A1/CALR/SH3BGL3/SCRT1/PARD6B /IFITM1/IRS2/FADD/SPHK1/ADIPOQ/RAPGEF2                                                                                                                                                                                                                                                                                                                                                                                                                                                                                                                                                                                                                                                                                                                                                                                                                                                                                                                                                                                                                                                                                                                                                                                                                                                                                                                             | 55  |



|            |                                                       |         |            |          |         |         |                                                                                                                                                                                                                                                                                                                                                                                                                                                                                                                                                                                                                                                                                                                                                                                                                                                                                                                                                                                                                                                                                                                                                                                                                      |     |
|------------|-------------------------------------------------------|---------|------------|----------|---------|---------|----------------------------------------------------------------------------------------------------------------------------------------------------------------------------------------------------------------------------------------------------------------------------------------------------------------------------------------------------------------------------------------------------------------------------------------------------------------------------------------------------------------------------------------------------------------------------------------------------------------------------------------------------------------------------------------------------------------------------------------------------------------------------------------------------------------------------------------------------------------------------------------------------------------------------------------------------------------------------------------------------------------------------------------------------------------------------------------------------------------------------------------------------------------------------------------------------------------------|-----|
| GO:0002682 | regulation of immune system process                   | 110/901 | 1391/17046 | 1.07E-05 | 0.00071 | 0.00056 | ABI1/TANK/KLRG1/SPON2/HCT/CCR1/MAP3K8/IL31RA/CYLD/COCH/NLRP6/DMBT1/EGFR/EGR3/A2M/UNC13D/FCGR2A/FGF10/RASA3/ACIN1/FOXO1/FLOT2/PUM2/MTOR/SLC37A4/FGF22/GNAS/GPER1/FFAR2/NRG1/HLA-B/HLA-DOA/HLA-DPA1/HLA-E/HLA-F/HLX/NR4A1/HSP90AA1/HSP90AB1/ZC3H12D/IGF1/IGF2/IL6/INHBA/IRF1/ITGB2/ITGB7/KDR/HES5/LCK/LGALS9/SMAD3/MAP3K1/MITF/MOV10/NFATC3/NOV/NRAS/LEF1/PML/IL20RB/TLR9/TREM1/PAG1/MAPK3/MAP2K2/MASP1/HTRA1/PSMB4/PSMD7/PTPRE/RASGRF2/TRIM27/BGLAP/NOD2/BMP4/SOX9/BPI/STAT2/STK10/SUPT6H/BST2/ZEB1/TLR5/TNF AIP3/CCR2/TNFRSF4/ZAP70/CA7/FZD5/LST1/NLRX1/ZC3H12A/CALR/UNC93B1/HIST1H3A/SLA2/IFITM1/SCIN/RUNX1/IRS2/FADD/SKAP2/RSAD2/CD8A/ADIPOQ/NUP93/RAPGEF2/CD79A/FGF19                                                                                                                                                                                                                                                                                                                                                                                                                                                                                                                                             | 110 |
| GO:0050678 | regulation of epithelial cell proliferation           | 32/901  | 265/17046  | 1.12E-05 | 0.00073 | 0.00058 | CDH3/CDH13/CDKN1C/LECT1/EGFR/EGR3/FGF10/VASH1/MTOR/NR4A1/IGF1/IL6/KDR/SMAD3/MCC/PLA2G2A/LIMS2/IFT122/PRKD1/HTRA1/SLURP1/CCL11/NOD2/SFRP2/BMP4/SOX9/TNFAIP3/TWIST1/WNT10B/TP63/RUNX3/ALDH1A2                                                                                                                                                                                                                                                                                                                                                                                                                                                                                                                                                                                                                                                                                                                                                                                                                                                                                                                                                                                                                          | 32  |
| GO:2000145 | regulation of cell motility                           | 57/901  | 599/17046  | 1.22E-05 | 0.00079 | 0.00062 | CDH13/CCR1/EGFR/EPHA1/SPATA13/FGF10/VASH1/FOX2/BMP10/GPER1/HAS1/IGF1/CYR61/IL1RN/IL6/KDR/LAMA3/LGALS9/LMNA/SMAD3/MCC/MAP3K1/NOV/NTF3/P2RY6/LEF1/ANGPT4/PITX2/ROBO4/ELP3/PRKD1/MAP2K2/FAM60A/CCL11/NOD2/SFRP2/SGK1/BMP4/SLC8A1/SOX9/STK10/BST2/PHLDA2/TWIST1/CCR2/PTP4A1/COL18A1/CALR/SH3BGRL3/SCRT1/PARD6B/IFITM1/IRS2/FADD/SPHK1/ADIPOQ/RAPGEF2                                                                                                                                                                                                                                                                                                                                                                                                                                                                                                                                                                                                                                                                                                                                                                                                                                                                     | 57  |
| GO:0006796 | phosphate-containing compound metabolic process       | 196/901 | 2808/17046 | 1.33E-05 | 0.00085 | 0.00067 | AKT3/ABI1/GNE/FARP1/CDKN1C/SPEG/BCKDK/TCIRG1/HCT/NPFFR2/ADCY3/CHI3L1/ACOT7/ALPK2/CCR1/CNP/APOA1BP/MAP3K8/ADM/IL31RA/UBLCP1/CPS1/TRPM6/CTGF/PPM1L/MBOAT1/ADRB3/FITM1/ADAL/NLRP6/DLG2/DRD4/EGFR/ENO2/ADCK5/EPHA1/EPHA3/EPHB4/FGA/FGF10/FHIT/RASA3/PPM1E/FOXO1/MORC3/MAPK8IP2/TSSK2/MTOR/GA BBR1/GAK/GAPDH5/RPS6KC1/FGF22/NPTN/AMPD2/PDE7B/AMPD3/BMP10/GNAS/PIGW/THEM5/GPER1/DOK7/GRB10/DNAJC15/GSTP1/GUCY1A3/NME7/ANXA2/NRG1/HK1/AC ACB/HPCA/HRH1/HSP90AB1/DUPD1/NMES9/IGF1/IGF2/CYR61/IL1RN/IL6/IL12RB2/INHBA/INPP5A/ISL1/ITGB2/KCNH2/KDR/HES5/LCK/LDLR/LGALS9/LHCGR/SMAD3/MC2R/ME1/M E2/MAP3K1/MGAT1/MOCS1/NUDT1/MYH4/NDUFB4/ATP1A2/NPPC/NRAS/NTF3/OAS2/OPRL1/ATP5B/PALM/PARK2/ANGPT4/PDE4C/PDE7A/SIRT6/PDE6B/PGAM2/PIGC/PIK3CG/ PKHD1/PKM/PLA2G2A/PRKAG3/PML/RIPK4/TLR9/SSH1/PON1/LPCAT2/PPP1CB/PPP1CC/ELP3/PPP2R2B/SMPD3/VAC14/PRKAR1B/CSGALNACT1/PRKD1/MAPK3/MAP2K2/MRAP/S LAMF8/PSMB4/PAK6/PSMD7/MARK4/PTPRE/PXN/RASGRF2/TRIM27/SCT/CCL11/CCL17/NOD2/SFRP2/SGK1/CERK/BMP4/BMPR1B/SOX9/STK3/STK10/TNFAIP3/TNFRSF1A/TNXXB/T WIST1/CCR2/TNFRSF4/UPPP1/YWHAG/ZAP70/PTP4A1/CXCR4/FZD5/CARD14/TTBK1/CDK10/KMO/RUNX3/IRS2/TNFRSF11A/STK19/SYNN2/SPHK1/LIMD1/MAP3K6/AURKB/ADIPOQ/ H2AFY/ENTPD3/RAPGEF2/ULK2/LPGAT1/FGF19 | 196 |
| GO:0071706 | tumor necrosis factor superfamily cytokine production | 17/901  | 98/17046   | 1.35E-05 | 0.00086 | 0.00067 | SPON2/CIDEA/GSTP1/HLA-E/ISL1/LGALS9/TLR9/POMC/TRIM27/NOD2/BPI/TNFAIP3/TWIST1/CCR2/ZC3H12A/FADD/ADIPOQ                                                                                                                                                                                                                                                                                                                                                                                                                                                                                                                                                                                                                                                                                                                                                                                                                                                                                                                                                                                                                                                                                                                | 17  |
| GO:1902531 | regulation of intracellular signal transduction       | 115/901 | 1479/17046 | 1.42E-05 | 0.00088 | 0.00069 | CDH13/FARP1/RCAN2/HCT/NPFFR2/CHI3L1/CCR1/SEZ6/TNFAIP81/MAP3K8/IL31RA/MIB2/CTGF/CYLD/ADRB3/NLRP6/DRD4/EGFR/A2M/ESR1/SPATA13/FGA/FGF10/RASA3/FOX O1/AKR1B1/RHOB2/PSD3/PUM2/ARHGFE18/MAPK8IP2/MTOR/ALS2CL/FGF22/CYTH4/BMP10/GNAS/GPER1/GSTP1/NRG1/IGF1/IGF2/CYR61/IL1RN/IL6/INHBA/ISL1/KDR/HES5/ LCK/ARHGDI1/LGALS9/LHCGR/MAP3K1/PLEKHG7/NOV/NRAS/NTF3/ARHGFE3/PARK2/PIK3CG/PKHD1/PLA2G2A/TLR9/ZDHHC13/ARHGFE10/LMBRD1/PRKD1/MAPK3/MAP2K2/PS MB4/PAK6/PSMD7/PLEKHG5/CCAR2/PXN/RASGRF2/S100A4/CCL11/CCL17/NOD2/SFRP2/ARHGAP9/BMP4/SOX9/STK3/BST2/TNFAIP3/TNFRSF1A/TNXXB/TRAFF5/TWIST1/ZAP70/CXC R4/FZD5/CARD14/NLRX1/SLA2/CDK10/IRS2/FADD/TNFRSF11A/SPHK1/LIMD1/STARD13/MAP3K6/CD8A/TRIP10/ADIPOQ/ARHGAP29/ARHGFE10/RAPGEF2/TELO2/IQSEC1/FGF19                                                                                                                                                                                                                                                                                                                                                                                                                                                                           | 115 |
| GO:0048584 | positive regulation of response to stimulus           | 138/901 | 1848/17046 | 1.42E-05 | 0.00088 | 0.00069 | ABI1/CDH3/TANK/TSPAN5/CDH13/CDKN1C/SPON2/HCT/ESM1/CHI3L1/CCR1/MAP3K8/IL31RA/MIB2/MPP7/CTGF/CYLD/ADRB3/RNF168/COCH/NLRP6/DMBT1/DRD4/EGFR/A2M /FCGR2A/FGA/FGF10/RASA3/FOX2/AKR1B1/LARP1/PUM2/MAPK8IP2/MTOR/FGF22/NPTN/BMP10/GNAS/GPER1/FFAR2/GRB10/NRG1/HK1/HLA-B/HLA-DPA1/HLA- E/HLX/HMGA1/HSP90AA1/HSP90AB1/RSP02/IGF1/IGF2/CYR61/IL1RN/IL6/IL16/INHBA/IRF1/ISL1/ITGB2/JIUP/KDR/HES5/LCK/LGALS9/LHCGR/SMAD3/MAP3K1/MFNG/NFATC3/NO V/NRAS/NTF3/PARK2/PIK3CG/PLA2G2A/PML/TLR9/ZDHHC13/LIMS2/PAG1/PRKD1/MAPK3/MAP2K2/MASP1/PSMB4/PSMD7/PLEKHG5/CCAR2/PXN/RASGRF2/S100A4/CCL11/CCL1 7/NOD2/STRA6/SFRP2/BMP4/BMPR1B/SOX9/STK3/BST2/TLR5/TNFAIP3/TNFRSF1A/TRAFF5/CCR2/WNT10B/YWHAG/ZAP70/CXCR4/FZD5/CARD14/BCL2L14/NLRX1/CALR/UNC93B1 /SLA2/HOPX/CDK10/TP63/RUNX3/IRS2/CRADD/FADD/TNFRSF11A/SPHK1/SKAP2/MAP3K6/RSAD2/CD8A/ADIPOQ/LY86/RAPGEF2/CD79A/FGF19                                                                                                                                                                                                                                                                                                                                                                  | 138 |
| GO:0001501 | skeletal system development                           | 48/901  | 478/17046  | 1.49E-05 | 0.00092 | 0.00072 | ABI1/CDKN1C/DMRT2/LECT1/CHI3L1/SLC38A10/COL11A1/COMP/FAM101A/CTGF/FOX2/BMP10/GNAS/FLVCR1/ANXA2/HOXB3/HOXC4/HOXC5/HOXC6/HOXD3/RSP02/FMN1/IG F1/IGF2/CYR61/HES5/SMAD3/MEF2D/NOV/NPPC/PITX2/CYTL1/BNC2/CSGALNACT1/MAPK3/BGLAP/SFRP2/BMP4/BMPR1B/SOX9/ZEB1/TWIST1/WNT10B/C6orf25/SCIN/RUNX1/T P63/RUNX3                                                                                                                                                                                                                                                                                                                                                                                                                                                                                                                                                                                                                                                                                                                                                                                                                                                                                                                  | 48  |
| GO:0042592 | homeostatic process                                   | 112/901 | 1434/17046 | 1.53E-05 | 0.00093 | 0.00073 | CDH3/TCIRG1/TRDN/ZBTB18/GJB6/ADCY3/EGLN2/CHRNA1/CIDEA/CLN5/CCR1/ZG16B/ADM/IL31RA/CPS1/CTGF/ADRB3/DBB1/BHLHA15/ABAT/DRD4/ESR1/ACIN1/FOXO1/AKR1B 1/NEDD4L/SLC37A4/DFNB31/STEAP2/NPTN/AMPD2/AMPD3/GNAS/GPER1/FFAR2/FLVCR1/GSTP1/ANXA6/HK1/ACADL/NME9/IGF1/IL1R1/IL1RN/IL6/AQP2/AQP5/INHBA/AQP9/KC N2/KDR/LCK/LDLR/LGALS9/MF12/NUBP1/ATP1A2/NOV/OPRL1/ATP5B/PARK2/SIRT6/PDE6B/PIK3CG/PKHD1/PML/IL20RB/TLR9/CYTL1/POMC/SLC30A10/CHRNA9/SYBU/PRKAR1B /PRKD1/SLAMF8/TRPC7/RFC2/RPA3/BGLAP/CCL11/ABHD4/NOD2/SGK1/BMP4/SLC4A1/SLC8A1/SLC9A3/SOX9/TCEA1/TERF1/TGM2/TNFAIP3/TRPC4/TRPC6/CCR2/CA7/CACNA1E/ CXCR4/RAB7A/CALR/SH3BGRL3/ATP13A4/CASQ1/TP63/IRS2/FADD/TNFRSF11A/LDB2/SMDT1/ADIPOQ/MTL5                                                                                                                                                                                                                                                                                                                                                                                                                                                                                                                               | 112 |
| GO:0001525 | angiogenesis                                          | 42/901  | 398/17046  | 1.57E-05 | 0.00094 | 0.00074 | CDH13/LECT1/ESM1/CHI3L1/ADM/CTGF/EGFR/EPHA1/EPHB4/FGF10/VASH1/FOX2/ANXA2/NR4A1/HOXB3/CYR61/IL6/ISL1/KDR/MEOX2/NFATC3/NOV/ATP5B/LEF1/ANGPT4/PIK 3CG/PITX2/PML/ROBO4/PARVA/PRKD1/CCL11/SFRP2/BMP4/TNFAIP3/TWIST1/CCR2/FZD5/ZC3H12A/COL18A1/RUNX1/SPHK1                                                                                                                                                                                                                                                                                                                                                                                                                                                                                                                                                                                                                                                                                                                                                                                                                                                                                                                                                                 | 42  |
| GO:0001503 | ossification                                          | 38/901  | 348/17046  | 1.84E-05 | 0.0011  | 0.00086 | CCR1/COL11A1/FAM101A/CTGF/EGFR/SBNO2/FOX2/GNAS/SOX8/ID3/RSP02/IGF1/IGF2/CYR61/IL6/SMAD3/MEF2D/NPPC/ATP5B/LEF1/CSGALNACT1/PRKD1/RDH14/BGLAP/SFR P2/BMP4/SLC8A1/BMPR1B/SOX9/TWIST1/WNT10B/IFITM1/TP63/RUNX3/TNFRSF11A/LIMD1/PIAS2/RSAD2                                                                                                                                                                                                                                                                                                                                                                                                                                                                                                                                                                                                                                                                                                                                                                                                                                                                                                                                                                                | 38  |

|            |                                                   |         |            |          |         |         |                                                                                                                                                                                                                                                                                                                                                                                                                                                                                                                                                                                                                                                                                                                                                                                                                                                                                                                                                                                                                                                                                                                                                                                                                                                                                                                                                                                                                                                                                                                                                                                                                                                                                                                                                                                                                                                                                                                                                                                                                                                                                                                                             |     |
|------------|---------------------------------------------------|---------|------------|----------|---------|---------|---------------------------------------------------------------------------------------------------------------------------------------------------------------------------------------------------------------------------------------------------------------------------------------------------------------------------------------------------------------------------------------------------------------------------------------------------------------------------------------------------------------------------------------------------------------------------------------------------------------------------------------------------------------------------------------------------------------------------------------------------------------------------------------------------------------------------------------------------------------------------------------------------------------------------------------------------------------------------------------------------------------------------------------------------------------------------------------------------------------------------------------------------------------------------------------------------------------------------------------------------------------------------------------------------------------------------------------------------------------------------------------------------------------------------------------------------------------------------------------------------------------------------------------------------------------------------------------------------------------------------------------------------------------------------------------------------------------------------------------------------------------------------------------------------------------------------------------------------------------------------------------------------------------------------------------------------------------------------------------------------------------------------------------------------------------------------------------------------------------------------------------------|-----|
| GO:0008285 | negative regulation of cell proliferation         | 57/901  | 608/17046  | 1.88E-05 | 0.00111 | 0.00087 | ABI1/CDH13/CDKN1C/SPEG/GJB6/LECT1/B4GALT7/ADM/FGF10/VASH1/MORC3/FBXO2/GPER1/GSTP1/HMGA1/ZC3H12D/IGF1/IL6/INHBA/IRF1/LGALS9/SMAD3/MCC/NOV/NPPC/CEND1/SIRT6/ATP8A2/PLA2G2A/PML/RIPPLY3/IL20RB/LIMS2/IFT122/PRKRIR/SLURP1/SFRP2/BMP4/BMPR1B/SOX9/STK3/ZEB1/TNFAIP3/WNT10B/FZD5/LST1/COL18A1/KDM2B/IFITM1/SCIN/CDK10/RUNX1/RUNX3/ALDH1A2/SKAP2/ADIPQ/RAPGEF2                                                                                                                                                                                                                                                                                                                                                                                                                                                                                                                                                                                                                                                                                                                                                                                                                                                                                                                                                                                                                                                                                                                                                                                                                                                                                                                                                                                                                                                                                                                                                                                                                                                                                                                                                                                    | 57  |
| GO:0031323 | regulation of cellular metabolic process          | 340/901 | 5352/17046 | 1.92E-05 | 0.00112 | 0.00088 | ABI1/CDH3/ZNF783/CDH13/MBNL2/FARP1/CDKN1C/CLD/ZBTB18/DMRT2/CELF1/TBR1/NPFFR2/ADCY3/PNRC1/TMED10/HNRNPUL1/CHI3L1/ERLIN2/PSIP1/EGLN2/CARD16/ZBED9/CIDEA/CCR1/SLC51B/MAP3K8/ZFP42/ADM/IL31RA/ZNF358/CSTA/ZNF738/CTGF/SMYD1/SH3D19/CYLD/ADRB3/ESCO2/ZNF782/ZNF709/ZNF781/CITED4/RNF168/ZNF366/BHLH A15/NLRP6/DLG2/DNMT3A/DRD4/ECE1/EEF2/EGFR/EGR3/PATL2/EIF4G1/A2M/ELK4/EPHA1/ESR1/SP8/FGA/FGF10/FHIT/XRN2/RASA3/PPM1E/SBNO2/TRAK1/MSRB2/ACIN1/FOX L1/FOXC2/FOXO1/SPG20/NEDD4L/LARP1/PUM2/RYPB/MAPK8IP2/VGLL2/MTOR/GABBR1/RNF144B/ZNF549/PNKD/FBXO2/GAPDH5/PABPC1/DNAJC2/FGF22/NPTN/DKK3/BMP10/ZNF638/GNAS/ZNF311/ZNF844/GPER1/DOK7/GRB10/ZBTB44/DNAJC15/GSTP1/GTF2B/BRF1/GUCY1A3/GZMA/ANXA2/SERPIND1/SOX8/SRINK7/HK1/HLX/HMGA1/NR4A1/ACACB/H PCA/HOXB3/HOXC4/HOXC5/HOXC6/HOXD3/HRH1/ACADL/HSP90AA1/HSP90AB1/TFAP2E/ID3/COL28A1/BARHL2/IGF1/IGF2/CYR61/IL1RN/IL6/IL16/FOXK2/INHBA/IRF1/ISL1/ITGB2 /ITIH3/ITIH4/JUP/USP50/HILS1/KDR/KIF25/HESS/AFF3/LCK/LDLR/LGALS9/LHCGR/LMNA/LMO2/LTB/SMAD3/MC2R/ME1/ME2/MEF2D/MAP3K1/MEOX1/MEOX2/MFI2/MITF/LHX8 /MOV10/NFATC3/NFYB/NHLH2/NPPC/NRAS/NTF3/OPRL1/PALM/PARK2/SPOCK3/LEF1/PRR16/ANGPT4/SIRT6/PGAM2/PI3/PIK3CG/PITX2/PKHD1/PLA2G2A/PLAGL1/PML/RIPPLY3/ RIPK4/TLR9/CYTL1/POMC/SSH1/POU2AF1/BNC2/MED18/BANP/PPP1CB/PIWIL2/ELP3/PRMT6/DNAJC17/ZNF532/PPP2R2B/FANCI/CNOT11/VAC14/PRKAR1B/CISD1/PRKD1/MYNN /MAPK3/MAP2K2/MRAP/PRMT8/MASP1/HTRA1/SLAMF8/PSMB4/PAK6/ARNTL2/RGMA/PRDM11/PSMD7/TENM2/GATAD2B/METTL14/CCAR2/PXN/CREBZF/RASGRF2/TRIM27/SC T/CCL11/CCL17/NPAS3/NOD2/SFRP2/TRA2B/GZF1/SGK1/BMP4/ZNF649/BMPR1B/BRD9/ZSCAN18/BOK/SOX9/STAT2/STK3/STK10/SUPT6H/BST2/TAFA4/TBP/TCEA1/TCEB2/ZEB1/T EAD3/TERF1/TIMP3/TLE3/TLR5/TNFAIP3/TNFRSF1A/TNXP/TRAF1/TRA5/PHLDA2/TWIST1/CCR2/TNFRSF4/UCP1/VARS/WNT10B/YWHAG/ZNF7/ZNF124/ZNF177/PAX8/CXCR4/FZD 5/RAB7A/CARD14/ZNF665/ZC3H14/ZNF606/ZC3H12A/CPEB4/ZNF436/CALR/SLIRP/CAST/SCRT1/HIST1H3A/SLA2/ZNF397/NR0B2/HOPX/SPINK7/KDM2B/LOXL3/CBX2/GAS7/CDK10 /RUNX1/TP63/RUNX3/SERPINA6/IRS2/ACTN1/CRADD/FADD/TNFRSF11A/SPHK1/BUD31/CCNA1/LIMD1/PIAS2/ZFAND2A/MAP3K6/LDB2/CBFA2T2/AURKB/DAPL1/ADIPQ/H2AFY/ MICAL2/N4BP1/VGLL4/RAPGEF2/ULK2/ZBTB39/FGF19/NR1H4 | 340 |
| GO:0010941 | regulation of cell death                          | 109/901 | 1395/17046 | 1.98E-05 | 0.00114 | 0.0009  | EGLN2/CARD16/CIDEA/ANKRD9/COMP/MAP3K8/ADM/IL31RA/CTGF/CYLD/DBB1/DNMT3A/EGFR/EGR3/ESR1/FGA/FGF10/ACIN1/FOXC2/FOXO1/DIP2A/ARHGFE18/GLS2/BMP10/ GPER1/GSTP1/GZMA/SOX8/NRG1/HSP90AB1/ID3/IGF1/CYR61/IL1RN/IL6/INHBA/ISL1/KDR/LCK/ARHGDI1/LGALS9/LMNA/SMAD3/MAP3K1/MITF/MPZ/NOV/NTF3/PFAH2/ARHG EF3/PARK2/UTP11L/LEF1/ANGPT4/PIK3CG/PKHD1/PML/LIMS2/PRKD1/PROC/PSMB4/PAK6/PSMD7/PTGFR/PLEKHG5/MARK4/CCAR2/RASGRF2/SCT/NOD2/SFRP2/SGK1/BMP4/BM PR1B/BOK/SOX9/STK3/STK10/ACTC1/TERF1/TGM2/TNFAIP3/TRA1/TRA5/TWIST1/TNFRSF4/WNT10B/YWHAG/PAX8/CARD14/BCL2L14/CPEB4/COL18A1/CALR/CAST/KDM2B/SCI N/TP63/RUNX3/IRS2/ACTN1/CRADD/FADD/ALDH1A2/SPHK1/MAP3K6/AURKB/ADIPQ/RAPGEF2                                                                                                                                                                                                                                                                                                                                                                                                                                                                                                                                                                                                                                                                                                                                                                                                                                                                                                                                                                                                                                                                                                                                                                                                                                                                                                                                                                                                                                                                          | 109 |
| GO:0009967 | positive regulation of signal transduction        | 105/901 | 1334/17046 | 2.10E-05 | 0.0012  | 0.00095 | CDH3/TSPAN5/CDH13/CDKN1C/HCS1/ESM1/CHI3L1/CCR1/MAP3K8/IL31RA/MI82/MPP7/CTGF/CYLD/ADRB3/DRD4/EGFR/FGA/FGF10/RASA3/AKR1B1/PUM2/MAPK8IP2/MTOR/F GF22/NPTN/BMP10/GNAS/GPER1/GRB10/NRG1/RSPO2/IGF1/IGF2/CYR61/IL1RN/IL6/INHBA/ISL1/JUP/KDR/HESS/LCK/LGALS9/LHCGR/SMAD3/MAP3K1/MFNG/NOV/NRAS/NTF3/ PARK2/PIK3CG/PLA2G2A/PML/TLR9/ZDHHC13/LIMS2/PAG1/PRKD1/MAP3K/MAP2K2/PSMB4/PSMD7/PLEKHG5/CCAR2/PXN/RASGRF2/S100A4/CCL11/CCL17/NOD2/SFRP2/BMP4 /BMPR1B/SOX9/STK3/BST2/TLR5/TNFRSF1A/TRA5/WNT10B/YWHAG/ZAP70/CXCR4/FZD5/CARD14/BCL2L14/SLA2/CDK10/TP63/RUNX3/IRS2/CRADD/FADD/TNFRSF11A/SPHK1/S KAP2/MAP3K6/RSAD2/CD8A/ADIPQ/LY86/RAPGEF2/FGF19                                                                                                                                                                                                                                                                                                                                                                                                                                                                                                                                                                                                                                                                                                                                                                                                                                                                                                                                                                                                                                                                                                                                                                                                                                                                                                                                                                                                                                                                                                    | 105 |
| GO:0060537 | muscle tissue development                         | 37/901  | 338/17046  | 2.24E-05 | 0.00127 | 0.001   | SPEG/ZBTB18/CHRNA1/COL11A1/SMYD1/FOXC2/FLNB/VGLL2/TENM4/BMP10/SOX8/NRG1/HLX/ISL1/LMNA/SMAD3/MEF2D/MEOX2/MYL2/NFATC3/NRAS/LEF1/SIRT6/PITX2/PLA GL1/BIN3/STRA6/BMP4/SLC8A1/SOX9/ACTC1/TWIST1/WNT10B/CALR/CASQ1/TP63/ALDH1A2                                                                                                                                                                                                                                                                                                                                                                                                                                                                                                                                                                                                                                                                                                                                                                                                                                                                                                                                                                                                                                                                                                                                                                                                                                                                                                                                                                                                                                                                                                                                                                                                                                                                                                                                                                                                                                                                                                                   | 37  |
| GO:0045669 | positive regulation of osteoblast differentiation | 12/901  | 55/17046   | 2.36E-05 | 0.00133 | 0.00104 | GNAS/IGF1/CYR61/IL6/NPPC/PRKD1/SFRP2/BMP4/BMPR1B/WNT10B/IFITM1/TP63                                                                                                                                                                                                                                                                                                                                                                                                                                                                                                                                                                                                                                                                                                                                                                                                                                                                                                                                                                                                                                                                                                                                                                                                                                                                                                                                                                                                                                                                                                                                                                                                                                                                                                                                                                                                                                                                                                                                                                                                                                                                         | 12  |
| GO:0001944 | vasculature development                           | 53/901  | 557/17046  | 2.46E-05 | 0.00137 | 0.00108 | CDH13/PDPN/LECT1/ESM1/CHI3L1/ADM/CTGF/EGR3/EPHA1/EPHB4/FGF10/VASH1/FOXC2/FOXO1/FLVCR1/ANXA2/NR4A1/HOXB3/IGF1/CYR61/IL6/ISL1/ITGA7/KDR/LOX/MEOX2/ NFATC3/NOV/ATP5B/LEF1/ANGPT4/PIK3CG/PITX2/PML/ROBO4/PARVA/PRKD1/ACTA2/CCL11/STRA6/SFRP2/BMP4/TNFAIP3/TWIST1/CCR2/FZD5/TMEM204/ZC3H12A/COL18A1/ RUNX1/ALDH1A2/SPHK1/RAPGEF2                                                                                                                                                                                                                                                                                                                                                                                                                                                                                                                                                                                                                                                                                                                                                                                                                                                                                                                                                                                                                                                                                                                                                                                                                                                                                                                                                                                                                                                                                                                                                                                                                                                                                                                                                                                                                 | 53  |
| GO:0010243 | response to organonitrogen compound               | 76/901  | 893/17046  | 2.51E-05 | 0.00139 | 0.00109 | TCIRG1/NPFFR2/ADCY3/TMED10/CHRNA1/CHRNA2/CHRNA5/AP3S1/ADM/CP51/CTGF/CYP11A1/DNMT3A/ABAT/DRD4/AGXT/EGFR/EGR3/EIF4G1/FGA/FGF10/RASA3/FOXC2/FOX O1/AKR1B1/MTOR/GATM/FGF22/GNAS/GPER1/GRB10/NRG1/NR4A1/HPCA/HRH1/HTR3A/IGF2/IL1RN/IL6/AQP9/JUP/IPO5/LCK/ATP1A2/NRAS/PARK2/PIK3CG/PKM/PRKAG3/TLR 9/SSH1/CHRNA9/PRKAR1B/LMBRD1/MAPK3/MAP2K2/PSMB4/PSMD7/PTPRE/PXN/RASGRF2/NOD2/SLC8A1/SOX9/VAMP2/ZEB1/TIMP3/TNFAIP3/WNT10B/CPEB4/MGARP/IRS2/A DIPOQ/RAPGEF2/FGF19/NR1H4                                                                                                                                                                                                                                                                                                                                                                                                                                                                                                                                                                                                                                                                                                                                                                                                                                                                                                                                                                                                                                                                                                                                                                                                                                                                                                                                                                                                                                                                                                                                                                                                                                                                           | 76  |
| GO:0040012 | regulation of locomotion                          | 60/901  | 659/17046  | 2.71E-05 | 0.00148 | 0.00117 | CDH13/TBR1/CCR1/EGFR/EPHA1/SPATA13/FGF10/VASH1/FOXC2/BMP10/GPER1/HAS1/IGF1/CYR61/IL1RN/IL6/IL16/KDR/LAMA3/LGALS9/LMNA/SMAD3/MCC/MAP3K1/NOV/NTF 3/P2RY6/LEF1/ANGPT4/PITX2/ROBO4/ELP3/PRKD1/MAP2K2/FAM60A/CCL11/NOD2/SFRP2/SGK1/BMP4/SLC8A1/SOX9/STK10/BST2/PHLDA2/TWIST1/CCR2/PTP4A1/CXCR4/COL1 8A1/CALR/SH3BGLR3/SCRT1/PARD6B/IFITM1/IRS2/FADD/SPHK1/ADIPQ/RAPGEF2                                                                                                                                                                                                                                                                                                                                                                                                                                                                                                                                                                                                                                                                                                                                                                                                                                                                                                                                                                                                                                                                                                                                                                                                                                                                                                                                                                                                                                                                                                                                                                                                                                                                                                                                                                          | 60  |
| GO:0045321 | leukocyte activation                              | 59/901  | 647/17046  | 3.03E-05 | 0.00164 | 0.00129 | CHGA/MAP3K8/IL31RA/CYLD/DDOST/RNF168/EGR3/UNC13D/FGF10/SBNO2/FLOT2/MTOR/GPER1/HLA-DOA/HLA-DPA1/HLA-E/HLX/ZC3H12D/IGF1/IGF2/IL6/INHBA/IRF1/ITGB2/LCK/LCP1/LGALS9/SMAD3/NFATC3/IL21R/LEF1/PIK3CG/IL20RB/APBB1P/PAG1/PTPRE/NOD2/CXCR5/BMP4/BPI/SUPT6H/BST2/ VAMP2/ZEB1/TNFAIP3/CCR2/TNFRSF4/ZAP70/CXCR4/FZD5/LST1/ZC3H12A/SLA2/IRS2/FADD/SKAP2/RSAD2/CD8A/CD79A                                                                                                                                                                                                                                                                                                                                                                                                                                                                                                                                                                                                                                                                                                                                                                                                                                                                                                                                                                                                                                                                                                                                                                                                                                                                                                                                                                                                                                                                                                                                                                                                                                                                                                                                                                                | 59  |

|            |                                          |         |            |          |         |         |                                                                                                                                                                                                                                                                                                                                                                                                                                                                                                                                                                                                                                                                                                                                                                                                                                                                                                                                                                                                                                                                                                                                                                                                                                                                                                                                                                                                                                                                                                                                                                                                                                                                                                                                                                                                                                                                                                                                                                                                                                                                                                 |     |
|------------|------------------------------------------|---------|------------|----------|---------|---------|-------------------------------------------------------------------------------------------------------------------------------------------------------------------------------------------------------------------------------------------------------------------------------------------------------------------------------------------------------------------------------------------------------------------------------------------------------------------------------------------------------------------------------------------------------------------------------------------------------------------------------------------------------------------------------------------------------------------------------------------------------------------------------------------------------------------------------------------------------------------------------------------------------------------------------------------------------------------------------------------------------------------------------------------------------------------------------------------------------------------------------------------------------------------------------------------------------------------------------------------------------------------------------------------------------------------------------------------------------------------------------------------------------------------------------------------------------------------------------------------------------------------------------------------------------------------------------------------------------------------------------------------------------------------------------------------------------------------------------------------------------------------------------------------------------------------------------------------------------------------------------------------------------------------------------------------------------------------------------------------------------------------------------------------------------------------------------------------------|-----|
| GO:0080090 | regulation of primary metabolic process  | 334/901 | 5271/17046 | 3.06E-05 | 0.00164 | 0.00129 | ABI1/ZNF783/CDH13/MBNL2/FARP1/CDKN1C/C1D/ZBTB18/DMRT2/CELF1/TBR1/NPFFR2/ADCY3/PNRC1/TMED10/HNRNPUL1/CHI3L1/ERLIN2/PSIP1/EGLN2/CARD16/ZBED9/CIDEA/CCR1/SLC51B/MAP3K8/ZFP42/ADM/IL131RA/ZNF358/LDLRAD3/CSTA/ZNF738/CTGF/SMYD1/SH3D19/CYLD/ADRB3/ESCO2/ZNF782/ZNF709/ZNF781/CITED4/RNF168/ZNF366/BH LHA15/NLRP6/DLG2/DNMT3A/DRD4/ECE1/EEF2/EGFR/EGR3/PATL2/EIF4G1/A2M/ELK4/EPHA1/ESR1/SP8/FGA/FGF10/FHIT/XRN2/RASA3/PPM1E/SBNO2/TRAK1/MSRB2/ACIN1/FOXO1/FOXO2/FOXO1/SPG20/GGA3/FLOT2/NEDD4L/LARP1/PUM2/RYPB/MAPK81P2/VGLL2/MTOR/GABBR1/RNF144B/ZNF549/PNK0/FBXO2/GAPDH5/PAB3/PDJAIC2/FGF22/NPT N/DKK3/BMP10/ZNF638/GNAS/ZNF311/ZNF844/GPER1/DOK7/GRB10/ZBTB44/DNAJC15/GSTP1/GTF2B/BRF1/GUCY1A3/GZMA/ANXA2/SERPIND1/SOX8/NRG1/HLX/HMGA1/NR4A1/ACACB/HPCA/HOXB3/HOXC4/HOXC5/HOXC6/HOXD3/HRH1/ACADL/HSP90A1/TFAP2E/ID3/COL28A1/BARHL2/IGF1/IGF2/CYR61/IL1RN/IL6/IL16/FOXK2/INHBA/IRF1/ISL1/ITGB2/ITIH3/ITIH4/JUP/USP50/HLS1/KDR/HESS/AFF3/LCK/LDLR/LGALS9/LHCGR/LMNA/LMO2/LTB/SMAD3/MC2R/ME1/ME2/MEF2D/MAP3K1/MEOX1/MEOX2/MFI2/MITF/LHX8/MOV10/NFATC3/NFYB/NHLH2/NPPC/NRAS/NTF3/OPRL1/PALM/PARK2/SPOCK3/LEF1/PRR16/ANGPT4/SIRT6/PGAM2/PI3/PIK3CG/PITX2/PKHD1/PLA2G2A/PLAGL1/PML/RIPPLY3/RIPK4/TLR9/CYTL1/POMC/SSH1/POU2AF1/BNC2/MED18/BANP/PPP1CB/PIWIL2/ELP3/PRMT6/DNAJC17/ZNF532/PPP2R2B/FANCI/CNOT11/VAC14/PRKAR1B/PRKD1/MYNN/MAK3/MA P2K2/MRAP/PRMT8/MASP1/HTRA1/PSMB4/PAK6/ARNTL2/RGMA/PRDM11/PSMD7/TENM2/GATAD2B/METTL4/CCAR2/PXN/CREBZF/RASGRF2/TRIM27/SCT/CCL11/CCL17/NPAS 3/NOD2/SFRP2/TRA2B/GZF1/SGK1/BMP4/ZNF649/BMPR1B/BRD9/ZSCAN18/BOK/SOX9/STAT2/STK3/STK10/SUPT6H/BST2/TAFA4B/TBP/TCEA1/TCEB2/ZEB1/TEAD3/TERF1/TIMP3/ TLE3/TNFAIP3/TNFRSF1A/TNXB/TRA1/TRA5/PHLDA2/TWIST1/CCR2/TNFRSF4/UCP1/VARS/WNT10B/YWHAG/ZNF7/ZNF124/ZNF177/PAX8/CXCR4/FZD5/RAB7A/CARD14/ZNF665 /ZC3H14/ZNF606/ZC3H12A/CPEB4/ZNF436/CALR/SLIRP/CAST/SCRT1/HIST1H3A/SLA2/ZNF397/NROB2/HOPX/SPINK7/KDM2B/LOXL3/CBX2/GAS7/CDK10/RUNX1/TP63/RUNX3/SER PINA6/IRS2/ACTN1/CRADD/FADD/TNFRSF11A/SPHK1/BUD31/CCNA1/LIMD1/PIAS2/ZFAND2A/MAP3K6/LDB2/CBFA2T2/AURKB/ADIPQ/H2AFY/MICAL2/N4BP1/VGLL4/RAPGEF2/ ZBTB39/FGF19/NR1H4 | 334 |
| GO:0071495 | cellular response to endogenous stimulus | 95/901  | 1190/17046 | 3.12E-05 | 0.00166 | 0.00131 | CDH13/CDKN1C/TCIRG1/NPFFR2/ADCY3/CIDEA/AP3S1/CPS1/CTGF/CYP11A1/DNMT3A/EGFR/EGR3/EIF4G1/ESR1/FGF10/RASA3/FOXO2/FOXO1/AKR1B1/SPG20/NEDD4L/ARHGEF1 8/MTOR/FGF22/NPTN/BMP10/GNAS/GPER1/GRB10/HAS1/NRG1/NR4A1/HRH1/IGF2/CYR61/IL1RN/IL6/INHBA/AQP9/ISL1/JUP/IPO5/HESS/LCK/LHCGR/LMO2/LTBP1/SMAD3/MAP 3K1/MOV10/ATP1A2/NRAS/P2RY6/PARK2/LEF1/PIK3CG/PRKAG3/PML/TLR9/SSH1/PPP1CB/PPP1CC/PRKAR1B/LMBRD1/MAPK3/MAP2K2/HTRA1/PSMB4/RGMA/PSMD7/PTGFR/P TPRE/PXN/RASGRF2/NOD2/SFRP2/BMP4/SLC8A1/BMPR1B/SOX9/VAMP2/ZEB1/WNT10B/PAX8/CPEB4/NROB2/TRIM63/MGARP/RUNX1/IRS2/ADIPQ/RAPGEF2/FGF19/NR1H4                                                                                                                                                                                                                                                                                                                                                                                                                                                                                                                                                                                                                                                                                                                                                                                                                                                                                                                                                                                                                                                                                                                                                                                                                                                                                                                                                                                                                                                                                                            | 95  |
| GO:0030278 | regulation of ossification               | 23/901  | 170/17046  | 3.19E-05 | 0.00168 | 0.00132 | CCR1/FAM101A/GNAS/ID3/IGF1/CYR61/IL6/SMAD3/NPPC/PRKD1/BGLAP/SFRP2/BMP4/SLC8A1/BMPR1B/SOX9/TWIST1/WNT10B/IFITM1/TP63/LIMD1/PIAS2/RSAD2                                                                                                                                                                                                                                                                                                                                                                                                                                                                                                                                                                                                                                                                                                                                                                                                                                                                                                                                                                                                                                                                                                                                                                                                                                                                                                                                                                                                                                                                                                                                                                                                                                                                                                                                                                                                                                                                                                                                                           | 23  |
| GO:0006950 | response to stress                       | 244/901 | 3676/17046 | 3.22E-05 | 0.00168 | 0.00132 | ABI1/CDH3/TANK/KLRG1/RCAN2/KCNMB2/TCIRG1/MRVI1/SPON2/ADCY3/CHGA/CHI3L1/ERLIN2/PSIP1/EGLN2/TP53TG1/CCR1/MAP3K8/ADM/IL131RA/HUS1B/CPS1/PXDNL/PARP4 /CTGF/CYLD/ADRB3/ESCO2/CYP11A1/TRPV3/DBD1/DDOST/RNF168/BHLHA15/COCH/NLRP6/DMBT1/DNMT3A/ABAT/DRD4/EGFR/EIF4G1/A2M/UNC13D/F11/FCGR2A/FGA/FGF10 /RASA3/VASH1/SBNO2/MSRB2/ACIN1/FOXO2/FOXO1/AKR1B1/MCL1/NUP210/LARP1/PUM2/MAPK81P2/MTOR/SLC37A4/ACOT11/FBXO2/GATM/GJA3/DNAJC2/FGF22/GJB2/BMP 10/GNAS/GPER1/FFAR2/DNAJC15/SCG3/GSTP1/GUCY1A3/ANXA2/SERPIND1/NRG1/HK1/HLA-B/HLA-DPA1/HLA-E/HLA-F/HMGA1/NR4A1/HRH1/HSPA1L/HSP90AA1/HSP90AB1/ID3/CD300E/IGF1/IGF2/CYR61/IL1R1/IL1RN/IL6/AQP2/INHBA/IRF1/AQP9/ISL1/ITGB2/ITIH4/KCNJ8/KCNMB1/ACAT1/KRT1 5/LCK/LGALS9/LMNA/LOX/SMAD3/MAP3K1/MOV10/NUDT1/NDUFB4/NFATC3/NOV/NPPC/NRAS/OAS2/PARK2/ANGPT4/C11orf73/SIRT6/PIK3CG/PKM/PLA2G2A/PRKAG3/PML/IL 20RB/TLR9/TREM1/APBB1P/PRMT6/FANCI/WDR33/PRKAR1B/PRKD1/BIN3/MAPK3/MAP2K2/PRKRIR/PROC/MASP1/HTRA1/SLAMF8/PSMB4/PAK6/TRPCT/PSMD7/CCAR2/PTPRCA P/PXN/RASGRF2/RFC2/TRIM27/RPA3/DEFB134/CCL11/CCL17/NOD2/SFRP2/SGK1/VPS33A/BMP4/SLC8A1/BMPR1B/BOK/BPI/STAT2/STK3/STK10/BST2/TCEA1/TCEB2/TIMP3/TLR5/ TNFAIP3/TNFRSF1A/TNXB/TRPC6/TRPM2/TWIST1/CCR2/TNFRSF4/UPP1/WNT10B/ZAP70/CA7/CACNA1E/CXCR4/FZD5/RAB7A/NLRX1/FAAP100/CPEB4/C6orf25/COL18A1/EEDP1/C ALR/UNC93B1/CAPS/CAPZB/HIST1H3A/CASQ1/HOPX/IL1F10/MGARP/RAE1/IFITM1/KMO/RUNX1/TP63/IRS2/ACTN1/CRADD/FADD/TNFRSF11A/SPHK1/STBD1/HSPB3/LIMD1/CCR1 2/MAP7/MAP3K6/SYTT7/ESAM/SLC16A3/RSAD2/DAPL1/RCS1/IL32/CD8A/ADIPQ/LY86/NUP93/RAPGEF2/ULK2/FGF19                                                                                                                                                                                                                                                                                                                                                                                                                                                                                                                                                     | 244 |
| GO:0060429 | epithelium development                   | 85/901  | 1037/17046 | 3.29E-05 | 0.0017  | 0.00134 | ABI1/CDH3/DMRT2/LECT1/FRMD6/ADM/CPS1/ZNF358/APCDD1/CSTA/CTGF/CYP11A1/DMBT1/EGFR/ESR1/FGF10/FOXO2/EXPH5/FLNB/FLOT2/LCE2B/GNAS/SOX8/NRG1/ID3/RSP O2/FMN1/IGF1/CYR61/LCE1C/LCE1D/LCE2D/IL6/INHBA/IVL/KDR/ACAT1/KRT15/INSC/HESS/LAMA3/SMAD3/MAP3K1/MEOX1/MEOX2/MITF/NFATC3/NTF3/LEF1/PITX2/PML/RIPK 4/IFT122/MAP2K2/PXN/ACTA2/CCL11/STRA6/SFRP2/GZF1/BMP4/SLC8A1/SOX9/STK3/ZEB1/TGM2/TCHH/TNFRSF1A/TWIST1/WNT10B/PAX8/FZD5/COL18A1/BFSP2/KDM2B/RUN X1/TP63/RUNX3/ALDH1A2/LDB2/CBFA2T2/ADIPQ/H2AFY/MICAL2/RAPGEF2                                                                                                                                                                                                                                                                                                                                                                                                                                                                                                                                                                                                                                                                                                                                                                                                                                                                                                                                                                                                                                                                                                                                                                                                                                                                                                                                                                                                                                                                                                                                                                                    | 85  |
| GO:1901698 | response to nitrogen compound            | 80/901  | 961/17046  | 3.33E-05 | 0.00171 | 0.00134 | TCIRG1/NPFFR2/ADCY3/TMED10/CHRNA1/CHRNA2/CHRNA5/AP3S1/ADM/CPS1/CTGF/CYP11A1/DNMT3A/ABAT/DRD4/AGXT/EGFR/EGR3/EIF4G1/FGA/FGF10/RASA3/FOXO2/FOX O1/AKR1B1/MTOR/GATM/FGF22/GNAS/GPER1/GRB10/NRG1/NR4A1/HPCA/HRH1/HTRA3/IGF2/IL1R1/IL1RN/IL6/AQP9/JUP/KCNJ8/IPO5/LCK/SMAD3/ATP1A2/NRAS/PARK2/PIK3 CG/PKM/PRKAG3/TLR9/SSH1/CHRNA9/PRKAR1B/LMBRD1/MAPK3/MAP2K2/PSMB4/PSMD7/PTPRE/PXN/RASGRF2/NOD2/BMP4/SLC8A1/SOX9/VAMP2/ZEB1/TIMP3/TNFAIP3/WN T10B/CPEB4/MGARP/IRS2/ADIPQ/RAPGEF2/FGF19/NR1H4                                                                                                                                                                                                                                                                                                                                                                                                                                                                                                                                                                                                                                                                                                                                                                                                                                                                                                                                                                                                                                                                                                                                                                                                                                                                                                                                                                                                                                                                                                                                                                                                         | 80  |
| GO:0006793 | phosphorus metabolic process             | 196/901 | 2851/17046 | 3.41E-05 | 0.00173 | 0.00136 | AKT3/ABI1/GNE/FARP1/CDKN1C/SPEG/BCKDK/TCIRG1/HCST/NPFFR2/ADCY3/CHI3L1/ACOT7/ALPK2/CCR1/CNP/APOA1BP/MAP3K8/ADM/IL131RA/UBLCP1/CPS1/TRPM6/CTGF/PP M1L/MBOAT1/ADRB3/FITM1/ADAL/NLRP6/DLG2/DRD4/EGFR/ENO2/ADCK5/EPHA1/EPHA3/EPH4/FGA/FGF10/FHIT/RASA3/PPM1E/FOXO1/MORC3/MAPK81P2/TSK2/MTOR/GA BBR1/GAK/GAPDH5/RPS6KC1/FGF22/NPTN/AMPD2/PDE7B/AMPD3/BMP10/GNAS/PIGW/THEM5/GPER1/DOK7/GRB10/DNAJC15/GSTP1/GUCY1A3/NME7/ANXA2/NRG1/HK1/AC ACB/HPCA/HRH1/HSP90A1/DUPD1/NMES9/IGF1/IGF2/CYR61/IL1RN/IL6/IL12RB2/INHBA/INPP5A/ISL1/ITGB2/KCNH2/KDR/HESS/LCK/LDLR/LGALS9/LHCGR/SMAD3/MC2R/ME1/M E2/MAP3K1/MGAT1/MOCS1/NUDT1/MYH4/NDUFB4/ATP1A2/NPPC/NRAS/NTF3/OAS2/OPRL1/ATP5B/PALM/PARK2/ANGPT4/PDE4C/PDE7A/SIRT6/PDE6B/PGAM2/PIGC/PIK3CG/ PKHD1/PKM/PLA2G2A/PRKAG3/PML/RIPK4/TLR9/SSH1/PON1/LPCAT2/PPP1CB/PPP1CC/ELP3/PPP2R2B/SMPD3/VAC14/PRKAR1B/CSGALNACT1/PRKD1/MAPK3/MAP2K2/MRAP/S LAMF8/PSMB4/PAK6/PSMD7/MARK4/PTPRE/PXN/RASGRF2/TRIM27/SCT/CCL11/CCL17/NOD2/SFRP2/SGK1/CERK/BMP4/BMPR1B/SOX9/STK3/STK10/TNFAIP3/TNFRSF1A/TNXB/T WIST1/CCR2/TNFRSF4/UPP1/YWHAG/ZAP70/PTP4A1/CXCR4/FZD5/CARD14/TTBK1/CDK10/KMO/RUNX3/IRS2/TNFRSF11A/STK19/SYJN2/SPHK1/LIMD1/MAP3K6/AURKB/ADIPQ/ H2AFY/ENTPD3/RAPGEF2/ULK2/LPGAT1/FGF19                                                                                                                                                                                                                                                                                                                                                                                                                                                                                                                                                                                                                                                                                                                                                                                                                                                                               | 196 |

|            |                                                         |         |            |          |         |         |                                                                                                                                                                                                                                                                                                                                                                                                                                                                                                                                                                                                                                                                                                                                                                                                                                                                                                                                                                                                                                                                                                                                                                                                                                                                                                                                                                                                                                                                                                                                                                          |     |
|------------|---------------------------------------------------------|---------|------------|----------|---------|---------|--------------------------------------------------------------------------------------------------------------------------------------------------------------------------------------------------------------------------------------------------------------------------------------------------------------------------------------------------------------------------------------------------------------------------------------------------------------------------------------------------------------------------------------------------------------------------------------------------------------------------------------------------------------------------------------------------------------------------------------------------------------------------------------------------------------------------------------------------------------------------------------------------------------------------------------------------------------------------------------------------------------------------------------------------------------------------------------------------------------------------------------------------------------------------------------------------------------------------------------------------------------------------------------------------------------------------------------------------------------------------------------------------------------------------------------------------------------------------------------------------------------------------------------------------------------------------|-----|
| GO:0045667 | regulation of osteoblast differentiation                | 17/901  | 105/17046  | 3.43E-05 | 0.00173 | 0.00136 | GNAS/ID3/IGF1/CYR61/IL6/SMAD3/NPPC/PRKD1/SFRP2/BMP4/BMPR1B/TWIST1/WNT10B/IFITM1/TP63/LIMD1/PIAS2                                                                                                                                                                                                                                                                                                                                                                                                                                                                                                                                                                                                                                                                                                                                                                                                                                                                                                                                                                                                                                                                                                                                                                                                                                                                                                                                                                                                                                                                         | 17  |
| GO:1901700 | response to oxygen-containing compound                  | 112/901 | 1462/17046 | 3.53E-05 | 0.00177 | 0.00139 | TCIRG1/SPON2/GJB6/NPFFR2/ADCY3/AP351/CNP/ADM/CPS1/CTGF/CYP11A1/DNMT3A/ABAT/DRD4/AGXT/EGFR/EGR3/EIF4G1/EPHA3/ESR1/FGA/FGF10/RASA3/SBNO2/FOXC2/FOXO1/AKR1B1/MLC1/MTOR/GATM/GJA3/FGF22/GJB2/GNAS/GPER1/FFAR2/GRB10/GSTP1/NRG1/NR4A1/HPCA/HSD17B2/HTR3A/HTR5A/IGF2/IL1R1/IL1RN/IL6/IL10RA/AQP2/IL12RB2/INHBA/AQP9/JUP/KCNJ8/IPO5/LCK/LGALS9/ME1/ATP1A2/NPPC/NRAS/OPRL1/P2RY6/PARK2/PIK3CG/PKM/PRKAG3/TLR9/SSH1/PON1/SYBU/PRKAR1B/LMBRD1/MAPK3/MAP2K2/PSMB4/PSMD7/PTGFR/PTPRE/PXN/RASGRF2/BGLAP/NOD2/BMP4/SLC8A1/SOX9/VAMP2/ZEB1/ACTC1/TIMP3/TLR5/TNFAIP3/TRPC6/TRPM2/WNT10B/CACNA1E/ZC3H12A/CPEB4/COL18A1/CALR/NROB2/TRIM63/MGARP/IRS2/TNFRSF11A/ALDH1A2/ADIPQ/LY86/RAPGEF2/FGF19/NR1H4                                                                                                                                                                                                                                                                                                                                                                                                                                                                                                                                                                                                                                                                                                                                                                                                                                                                                      | 112 |
| GO:0014070 | response to organic cyclic compound                     | 67/901  | 768/17046  | 3.60E-05 | 0.00179 | 0.0014  | ADCY3/CHRNA1/CHRNA2/CHRNA5/CIDEA/ADM/CPS1/CTGF/CYP11A1/CITED4/ZNF366/DNMT3A/ABAT/DRD4/AGXT/EGFR/EGR3/ESR1/FGA/FGF10/MLC1/GJB2/GNAS/GPER1/GUCY1A3/NR4A1/HPCA/HRH1/HSP90AB1/HTR3A/HTR5A/IL1RN/IL6/INHBA/AQP9/ISL1/JUP/KCNJ8/ACAT1/LOX/SMAD3/ATP1A2/OPRL1/P2RY6/PARK2/LEF1/PIK3CG/SSH1/CHRNA9/MAPK3/PTGFR/BGLAP/NOD2/BMP4/SLC8A1/SLC9A3/TIMP3/WNT10B/CALR/NROB2/TRIM63/MGARP/RAE1/ALDH1A2/ADIPQ/RAPGEF2/NR1H4                                                                                                                                                                                                                                                                                                                                                                                                                                                                                                                                                                                                                                                                                                                                                                                                                                                                                                                                                                                                                                                                                                                                                               | 67  |
| GO:0042692 | muscle cell differentiation                             | 37/901  | 346/17046  | 3.73E-05 | 0.00184 | 0.00144 | SPEG/ADM/SMYD1/BHLHA15/FGF10/FLOT2/SYNE1/MTOR/BMP10/TMOD4/SOX8/NRG1/ID3/IGF1/IGF2/ISL1/LMNA/MYL2/NFATC3/NOV/NTF3/LEF1/PITX2/BIN3/CCL17/BMP4/SLC8A1/SOX9/SUPT6H/ZEB1/ACTC1/WNT10B/TMEM204/CALR/CAST/CASQ1/HOPX                                                                                                                                                                                                                                                                                                                                                                                                                                                                                                                                                                                                                                                                                                                                                                                                                                                                                                                                                                                                                                                                                                                                                                                                                                                                                                                                                            | 37  |
| GO:0023056 | positive regulation of signaling                        | 112/901 | 1467/17046 | 4.07E-05 | 0.00199 | 0.00156 | CDH3/TSPAN5/CDH13/CDKN1C/TRDN/HCT/ESM1/CHI3L1/CCR1/MAP3K8/IL31RA/MIB2/MPP7/CTGF/CYLD/ADRB3/ABAT/DRD4/ECE1/EGFR/FGA/FGF10/RASA3/AKR1B1/PUM2/MAPK8IP2/MTOR/FGF22/NPTN/BMP10/GNAS/GPER1/GRB10/NRG1/RSPO2/IGF1/IGF2/CYR61/IL1RN/IL6/INHBA/ISL1/JUP/KDR/HES5/LCK/LGALS9/LHCGR/SMAD3/MAP3K1/MFNG/NOV/NRAS/NTF3/PARK2/PIK3CG/PLA2G2A/PML/TLR9/ZDHHC13/LIMS2/PAG1/PRKD1/MAPK3/MAP2K2/PSMB4/PSMD7/PLEKHG5/CCAR2/PXN/RASGRF2/S100A4/SCT/CCL11/CCL17/NOD2/SFRP2/BMP4/BMPR1B/SOX9/STK3/BST2/VAMP2/TLR5/TNFRSF1A/TRAFF5/WNT10B/YWHAG/ZAP70/CA7/CXCR4/FZD5/CARD14/BCL2L14/SLA2/NROB2/CDK10/TP63/RUNX3/IRS2/CRADD/FADD/TNFRSF11A/SPHK1/SKAP2/MAP3K6/RSAD2/CD8A/ADIPQ/LY86/RAPGEF2/FGF19                                                                                                                                                                                                                                                                                                                                                                                                                                                                                                                                                                                                                                                                                                                                                                                                                                                                                                 | 112 |
| GO:0010647 | positive regulation of cell communication               | 113/901 | 1485/17046 | 4.32E-05 | 0.00209 | 0.00164 | CDH3/TSPAN5/CDH13/CDKN1C/TRDN/HCT/ESM1/CHI3L1/CCR1/MAP3K8/IL31RA/MIB2/MPP7/CTGF/CYLD/ADRB3/ABAT/DRD4/EGFR/FGA/FGF10/RASA3/AKR1B1/LARP1/PUM2/MAPK8IP2/MTOR/FGF22/NPTN/BMP10/GNAS/GPER1/GRB10/NRG1/HK1/RSPO2/IGF1/IGF2/CYR61/IL1RN/IL6/INHBA/ISL1/JUP/KDR/HES5/LCK/LGALS9/LHCGR/SMAD3/MAP3K1/MFNG/NOV/NRAS/NTF3/PARK2/PIK3CG/PLA2G2A/PML/TLR9/ZDHHC13/LIMS2/PAG1/PRKD1/MAPK3/MAP2K2/PSMB4/PSMD7/PLEKHG5/CCAR2/PXN/RASGRF2/S100A4/SCT/CCL11/CCL17/NOD2/SFRP2/BMP4/BMPR1B/SOX9/STK3/BST2/VAMP2/TLR5/TNFRSF1A/TRAFF5/WNT10B/YWHAG/ZAP70/CA7/CXCR4/FZD5/CARD14/BCL2L14/SLA2/NROB2/CDK10/TP63/RUNX3/IRS2/CRADD/FADD/TNFRSF11A/SPHK1/SKAP2/MAP3K6/RSAD2/CD8A/ADIPQ/LY86/RAPGEF2/FGF19                                                                                                                                                                                                                                                                                                                                                                                                                                                                                                                                                                                                                                                                                                                                                                                                                                                                                            | 113 |
| GO:0051241 | negative regulation of multicellular organismal process | 76/901  | 908/17046  | 4.40E-05 | 0.00211 | 0.00166 | CDH3/MRV1/LECT1/CIDEA/CCR1/SEZ6/ADM/FAM101A/CYLD/ADRB3/TRPV3/F11/FGA/VASH1/FOXC2/SPG20/BMP10/GNAS/GSTP1/GUCY1A3/ANXA2/SOX8/HLX/ID3/RSPO2/IGF1/IL6/INHBA/IRF1/ISL1/HES5/ARHGDI1/LGALS9/SMAD3/MCC/ATP1A2/NOV/NPPC/NRAS/LEF1/CEND1/ANGPT4/PIK3CG/PML/IL20RB/TLR9/POMC/LIMS2/IFT122/PROC/TRIM27/SCT/NOD2/SFRP2/BMP4/SLIT1/SOX9/BPI/STK3/BST2/TNFAIP3/TWIST1/CCR2/TNFRSF4/PAX8/NLRX1/ZC3H12A/RAB11FIP1/CALR/RUNX1/TP63/LIMD1/CBFA2T2/ADIPQ/RAPGEF2/ULK2                                                                                                                                                                                                                                                                                                                                                                                                                                                                                                                                                                                                                                                                                                                                                                                                                                                                                                                                                                                                                                                                                                                       | 76  |
| GO:0009889 | regulation of biosynthetic process                      | 252/901 | 3834/17046 | 4.52E-05 | 0.00211 | 0.00166 | CDH3/ZNF783/CDH13/CDKN1C/C1D/ZBTB18/DMRT2/CELF1/TBR1/NPFFR2/PNRC1/HNRNPUL1/ERLIN2/PSIP1/EGLN2/ZBED9/CIDEA/SLC51B/ZFP42/ADM/IL31RA/ZNF358/ZNF738/CTGF/SMYD1/CYLD/ADRB3/ESCO2/ZNF782/ZNF709/ZNF781/CITED4/RNF168/ZNF366/BHLHA15/DNMT3A/DRD4/EEF2/EGFR/EGR3/PATL2/EIF4G1/ELK4/ESR1/SP8/FGF10/FHIT/XR22/SBNO2/TRAK1/MSRB2/FOXO1/FOXC2/FOXO1/SPG20/NEDD4L/LARP1/PUM2/RYBP/VGLL2/MTOR/GABBR1/ZNF549/PABPC1/DNAJC2/DKK3/BMP10/ZNF638/GNAS/ZNF311/ZNF844/GPER1/GRB10/ZBTB44/GSTP1/GTF2B/BRF1/GUCY1A3/SOX8/NRG1/HLX/HMGA1/NR4A1/HPCA/HOXB3/HOXC4/HOXC5/HOXC6/HOXD3/HRH1/ACADL/HSP90AA1/HSP90AB1/TAF2E/ID3/BARHL2/IGF1/IGF2/CYR61/IL6/IL16/FOXK2/INHBA/IRF1/ISL1/JUP/USP50/HILS1/KDR/HES5/AFF3/LDLR/LGALS9/LHCGR/LMNA/LMO2/LTB/SMAD3/MC2R/MEF2D/MEOX1/MEOX2/MITF/LHX8/MOV10/NFATC3/NFYB/NHLH2/NPPC/NTF3/OPRL1/PALM/PARK2/LEF1/PRR16/SIRT6/PITX2/PKHD1/PLAGL1/PML/RIPPLY3/RIPK4/TLR9/CYTL1/POMC/POU2A1/BNC2/MED18/BANP/PPP1CB/PIWIL2/ELP3/PRMT6/DNAJC17/ZNF532/CNOT11/PRKD1/MYNN/MAPK3/MRAP/PRMT8/HTRA1/PAK6/ARNTL2/RGMA/PRDM11/TENM2/GATAD2B/METTL14/CCAR2/CREBZF/TRIM27/SCT/NPAS3/NOD2/SFRP2/GZF1/SGK1/BMP4/ZNF649/BMPR1B/BRD9/ZSCAN18/SOX9/STAT2/STK3/SUPT6H/TAFA4B/TBP/TCEA1/TCEB2/ZEB1/TEAD3/TERF1/TLE3/TLR5/TNFAIP3/TNFRSF1A/TRAFF1/TRAFF5/TWIST1/CCR2/TNFRSF4/UCP1/VARS/WNT10B/ZNF7/ZNF124/ZNF177/PAX8/FZD5/CARD14/ZNF665/ZNF606/ZC3H12A/CPEB4/ZNF436/CALR/SLIRP/SCRT1/HIST1H3A/SLA2/ZNF397/NROB2/HOPX/KDM2B/LOXL3/CBX2/GAS7/RUNX1/TP63/RUNX3/IRS2/ACTN1/FADD/TNFRSF11A/SPHK1/BUD31/CCNA1/LIMD1/PIAS2/LDB2/CBFA2T2/AURKB/ADIPQ/H2AFY/MICAL2/VGLL4/RAPGEF2/ZBTB39/FGF19/NR1H4 | 252 |
| GO:0009893 | positive regulation of metabolic process                | 220/901 | 3277/17046 | 4.54E-05 | 0.00211 | 0.00166 | AB1/CDH3/CDH13/FARP1/CDKN1C/PITRM1/DMRT2/TBR1/ADCY3/CHI3L1/ERLIN2/PSIP1/EGLN2/PSIP1/SLC51B/MAP3K8/ADM/IL31RA/CTGF/SH3D19/ADRB3/CITED4/RNF168/BHLHA15/DRD4/ECE1/EEF2/EGFR/EPHA1/ESR1/SPATA13/FGA/FGF10/RASA3/SBNO2/FOXC2/TBC1D9B/FOXO1/GGA3/TBC1D1/PSD3/LARP1/ARHGEF18/MAPK8IP2/VGLL2/MTOR/RASGEF1C/RNF144B/ALS2CL/RGS22/GAPDH5/PABPC1/DNAJC2/FGF22/NPTN/CYTH4/BMP10/GNAS/GPER1/DOK7/GRB10/DNAJC15/GSTP1/BRF1/GUCY1A3/ANXA2/SOX8/NRG1/HK1/HMGA1/NR4A1/ACACB/HPCA/HOXD3/AGFG2/HRH1/HSP90AA1/HSP90AB1/TFAP2E/BARHL2/IGF1/IGF2/CYR61/IL1RN/IL6/FOXK2/INHBA/IRF1/ISL1/JUP/KDR/HES5/LCK/LDLR/ARHGDI1/LGALS9/LHCGR/LLGL1/LMNA/LMO2/LTB/SMAD3/MC2R/MEF2D/MAP3K1/MEOX1/MEOX2/MF12/MITF/PLEKHG7/NFATC3/NFYB/NHLH2/NPPC/NRAS/NTF3/OPRL1/ARHGEF3/PARK2/LEF1/PRR16/ANGPT4/PIK3CG/PITX2/PLA2G2A/PLAGL1/PML/PNLI/RIK4/TLR9/CYTL1/POMC/RIN2/BANP/PIWIL2/ARHGEF10L/FANCI/PRKAR1B/PRKD1/MAPK3/MAP2K2/MRAP/PSMB4/PAK6/ARNTL2/RGMA/PSMD7/PTGFR/PLEKHG5/PXN/ACTA2/RASGRF2/TRIM27/RGS12/SCT/CCL11/CCL17/NPAS3/NOD2/SFRP2/ARHGAP9/TRA2B/BMP4/ZNF649/BMPR1B/BOK/SOX9/STK3/STK10/SUPT6H/TBP/TCEA1/TCEB2/ZEB1/ACTC1/TEAD3/TLR5/TNFAIP3/TNFRSF1A/TRAFF1/TRAFF5/TWIST1/CCR2/WNT10B/PAX8/CXCR4/FZD5/RAB7A/CARD14/ZC3H12A/CALR/SH3BGL3/NROB2/CDK10/RUNX1/TP63/RUNX3/IRS2/CRADD/FADD/TNFRSF11A/ALDH1A2/SPHK1/STARD13/PIAS2/ZFAND2A/MAP3K6/LDB2/CBFA2T2/ADIPQ/ARHGAP29/H2AFY/ARHGEF10/MICAL2/RAPGEF2/USP6NL/RABGAP1/IQSEC1/FGF19/NR1H4                                                                                                                                                                   | 220 |

|            |                                                        |         |            |          |         |         |                                                                                                                                                                                                                                                                                                                                                                                                                                                                                                                                                                                                                                                                                                                                                                                                                                                                                                                                                                                                                                                                                                                                                                                                                                                                                                                                                                                                                                                                                                                                                                                                                                     |     |
|------------|--------------------------------------------------------|---------|------------|----------|---------|---------|-------------------------------------------------------------------------------------------------------------------------------------------------------------------------------------------------------------------------------------------------------------------------------------------------------------------------------------------------------------------------------------------------------------------------------------------------------------------------------------------------------------------------------------------------------------------------------------------------------------------------------------------------------------------------------------------------------------------------------------------------------------------------------------------------------------------------------------------------------------------------------------------------------------------------------------------------------------------------------------------------------------------------------------------------------------------------------------------------------------------------------------------------------------------------------------------------------------------------------------------------------------------------------------------------------------------------------------------------------------------------------------------------------------------------------------------------------------------------------------------------------------------------------------------------------------------------------------------------------------------------------------|-----|
| GO:0009725 | response to hormone                                    | 81/901  | 985/17046  | 4.54E-05 | 0.00211 | 0.00166 | TCIRG1/NPFFR2/ADCY3/AP3S1/ADM/CPS1/CTGF/CYP11A1/CITED4/ZNF366/DNM3A/DRD4/AGXT/EGFR/EGR3/EIF4G1/ESR1/FGA/FGF10/RASA3/FOXC2/FOXO1/AKR1B1/MTOR/STEA2/GATM/FGF22/GJB2/GNAS/GPER1/GRB10/NRG1/NR4A1/HTR5A/IGF2/IL1RN/IL6/INHBA/ISL1/ACAT1/LCK/LHCGR/LMO2/LOX/ME1/ATP1A2/NRAS/OPRL1/P2RY6/LEF1/PITX2/PKM/PRKAG3/TLR9/PRKAR1B/LMBRD1/MAPK3/MAP2K2/PSMB4/PSMD7/PTGFR/PTPRE/PXN/RASGRF2/BGLAP/BMP4/SLC9A3/VAMP2/TIMP3/WNT10B/PAX8/CALR/NR0B2/TRIM63/MGARP/IRS2/ALDH1A2/ADIPOQ/RAPGEF2/FGF19/NR1H4                                                                                                                                                                                                                                                                                                                                                                                                                                                                                                                                                                                                                                                                                                                                                                                                                                                                                                                                                                                                                                                                                                                                             | 81  |
| GO:0006955 | immune response                                        | 113/901 | 1487/17046 | 4.57E-05 | 0.00211 | 0.00166 | ABI1/TANK/KLRG1/SPON2/HCT/ADCY3/CHGA/CCR1/MAP3K8/ADM/CYLD/DDOST/RNF168/COCH/NLRP6/DMBT1/EGFR/A2M/UNC13D/FCGR2A/FGA/FGF10/RASA3/SBNO2/FOXO1/MTOR/FGF22/GPER1/FFAR2/GZMA/NRG1/HLA-B/HLA-DOA/HLA-DPA1/HLA-E/HLA-F/HLX/NR4A1/HSP90AA1/HSP90AB1/CD300E/IL1R1/IL1RN/IL6/IL16/IRF1/AQP9/ITGB2/ITGB7/LCK/LCP1/LGALS9/LTB/SMAD3/MAP3K1/MOV10/NFATC3/NRAS/OAS2/LEF1/PIK3CG/PML/IL20RB/TLR9/TREM1/POU2AF1/APBB1P/PRKAR1B/PAG1/PRKD1/MAPK3/MAP2K2/MASP1/PSMB4/PSMD7/RASGRF2/TRIM27/DEFB134/CCL11/CCL17/NOD2/TINAGL1/CXCR5/BPI/STAT2/SUPT6H/BST2/VAMP2/ZEB1/TLR5/TNFAIP3/CCR2/TNFRSF4/ZAP70/FZD5/LST1/NLRX1/UNC93B1/SLA2/IL1F10/IFITM1/IRS2/FADD/TNFRSF11A/ENDOU/SKAP2/RSAD2/IL32/CD8A/LY86/RAPGEF2/CD79A/FGF19                                                                                                                                                                                                                                                                                                                                                                                                                                                                                                                                                                                                                                                                                                                                                                                                                                                                                                                                  | 113 |
| GO:0050673 | epithelial cell proliferation                          | 35/901  | 323/17046  | 4.58E-05 | 0.00211 | 0.00166 | CDH3/CDH13/CDKN1C/LECT1/EGFR/EGR3/ESR1/FGF10/VASH1/MTOR/NR4A1/IGF1/IL6/KDR/SMAD3/MCC/NOV/PLA2G2A/LIMS2/IFT122/PRKD1/MAP2K2/HTRA1/SLURP1/CCL11/NOD2/SFRP2/BMP4/SOX9/TNFAIP3/TWIST1/WNT10B/TP63/RUNX3/ALDH1A2                                                                                                                                                                                                                                                                                                                                                                                                                                                                                                                                                                                                                                                                                                                                                                                                                                                                                                                                                                                                                                                                                                                                                                                                                                                                                                                                                                                                                         | 35  |
| GO:0007517 | muscle organ development                               | 36/901  | 337/17046  | 4.84E-05 | 0.00222 | 0.00174 | SPEG/ZBTB18/CHRNA1/COL11A1/SMYD1/EGR3/FOXC2/FLNB/VGLL2/BMP10/SOX8/NRG1/HLX/ID3/IGF1/IL6/ISL1/ITGA7/LMNA/SMAD3/MEF2D/MEOX2/MYL2/NFATC3/NRAS/LEF1/SIRT6/PITX2/PLAGL1/BIN3/STRA6/BMP4/ACTC1/TWIST1/WNT10B/CASQ1                                                                                                                                                                                                                                                                                                                                                                                                                                                                                                                                                                                                                                                                                                                                                                                                                                                                                                                                                                                                                                                                                                                                                                                                                                                                                                                                                                                                                        | 36  |
| GO:1901362 | organic cyclic compound biosynthetic process           | 263/901 | 4032/17046 | 4.92E-05 | 0.00224 | 0.00176 | CDH3/ZNF783/CDH13/CDKN1C/TCIRG1/C1D/ZBTB18/MTHFS/DMRT2/TBR1/NPFFR2/ADCY3/PNRC1/SLC27A2/HNRNPUL1/ERLIN2/PSIP1/EGLN2/ACOT7/ZBED9/CIDEA/ZFP42/ADM/IL31RA/CPS1/ZNF358/ZNF738/CTGF/SMYD1/CYLD/ADRB3/CYP11A1/ZNF782/ADAL/ZNF709/ZNF781/CITED4/DB1/RNF168/ZNF366/BHLHA15/DNMT3A/DRD4/EGFR/EGR3/ELK4/ESR1/ALAS1/SP8/FGF10/FHIT/XRN2/SBNO2/TRAK1/MSRB2/FOXL1/FOXC2/FOXO1/AKR1B1/NUP210/NEDD4/RYP/VGLL2/MTOR/GABBR1/ZNF549/DNAJC2/AMPD2/DKK3/SL2/A/MPD3/BMP10/ZNF638/GNAS/ZNF311/ZNF844/GPER1/ZBTB44/GTF2B/BRF1/GUCY1A3/NME7/SOX8/NRG1/HLX/HMGA1/NR4A1/ACACB/HPCA/HOXB3/HOXC4/HOXC5/HOXC6/HOXD3/HSD11B1/HSD17B2/TFAP2E/ID3/BARHL2/NME9/IGF1/IGF2/CYR61/IL6/IL16/FOXK2/INHBA/IRF1/ISL1/JUP/USP50/HILS1/HES5/AFF3/LGALS9/LHCGR/LMO2/SMAD3/MC2R/ME1/MEF2D/MEOX1/MEOX2/MITF/LHX8/MOCS1/MOV10/DRG1/NFATC3/NFYB/NHLH2/NPPC/NTF3/OAS2/OPRL1/ATP5B/PALM/PARK2/LEF1/SIRT6/PITX2/PKHD1/PKM/PLAGL1/PRKAG3/PML/RIPPLY3/RIPK4/TLR9/CYTL1/POMC/POU2AF1/BNC2/MED18/BANP/ELP3/PRMT6/DNAJC17/ZNF532/CNOT11/PRKD1/MYNN/MAPK3/MRAP/PRMT8/PAK6/ARNTL2/RGMA/PRDM11/TENM2/GATAD2B/CCAR2/CREBZF/RFC2/TRIM27/RGS12/RPA3/RPL8/RPL29/SCT/NPAS3/NOD2/SFRP2/GZF1/SGK1/BMP4/ZNF649/BMPR1B/BRD9/ZSCAN18/SOX9/STAT2/STK3/SUPT6H/TAF4B/TBP/TCEA1/TCEB2/ZEB1/TEAD3/TERF1/TLE3/TNFAIP3/TNFRSF1A/TRAFA1/TRAFF5/TWIST1/CCR2/TNFRSF4/UCP1/UPP1/WNT10B/YWHAG/ZNF7/ZNF124/ZNF177/PAX8/FZD5/CARD14/ZNF665/ZNF606/ZC3H12A/ZNF436/CALR/QTRT1/SLIRP/SCRT1/HIST1H3A/SLA2/ZNF397/NR0B2/HOPX/KDM2B/LOXL3/CBX2/RAE1/GAS7/KMO/RUNX1/TP63/RUNX3/ACTN1/FADD/TNFRSF11A/SPHK1/BUD31/CCNA1/LIMD1/CH25H/PIAS2/LDB2/CBFA2T2/AURKB/SDR42E1/ADIPOQ/H2AFY/MICAL2/VGLL4/NUP93/RAPGEF2/ZBTB39/FGF19/NR1H4 | 263 |
| GO:0044057 | regulation of system process                           | 42/901  | 418/17046  | 4.98E-05 | 0.00225 | 0.00177 | KCNMB2/MRV1/TRDN/CEL2/ADM/CPS1/CTGF/ECE1/FGA/FGF10/NEDD4L/TENM4/BMP10/GPER1/GUCY1A3/KCNIP2/NRG1/ANXA6/HRH1/IGF1/IL6/INHBA/JUP/KCNH2/LCK/MYL2/ATP1A2/NOV/NPPC/OPRL1/PIK3CG/POMC/SCT/SGK1/SLC8A1/CACNA1E/RAB11FIP1/CASQ1/HOPX/TRIM63/SPHK1/ADIPOQ                                                                                                                                                                                                                                                                                                                                                                                                                                                                                                                                                                                                                                                                                                                                                                                                                                                                                                                                                                                                                                                                                                                                                                                                                                                                                                                                                                                     | 42  |
| GO:0055086 | nucleobase-containing small molecule metabolic process | 60/901  | 675/17046  | 5.43E-05 | 0.00243 | 0.00191 | GNE/TCIRG1/NPFFR2/ADCY3/ACOT7/CNP/APOA1BP/ADM/CPS1/ADRB3/ADAL/DLG2/DNM3A/DRD4/ENO2/FHIT/MTOR/GABBR1/GAPDH/AMPD2/PDE7B/AMPD3/GNAS/GPER1/DNAJC15/GUCY1A3/NME7/HK1/ACACB/HPCA/NME9/IGF1/LHCGR/MC2R/ME1/ME2/MGAT1/NUDT1/MYH4/NDUF4B/ATP1A2/NPPC/OAS2/OPRL1/ATP5B/PALM/PDE4C/PDE7A/SIRT6/PDE6B/PGAM2/PKM/CSGALNACT1/MRAP/SCT/CCR2/UPP1/QTRT1/KMO/ENTPD3                                                                                                                                                                                                                                                                                                                                                                                                                                                                                                                                                                                                                                                                                                                                                                                                                                                                                                                                                                                                                                                                                                                                                                                                                                                                                  | 60  |
| GO:0031326 | regulation of cellular biosynthetic process            | 249/901 | 3792/17046 | 5.50E-05 | 0.00245 | 0.00192 | CDH3/ZNF783/CDH13/CDKN1C/C1D/ZBTB18/DMRT2/CEL1/TBR1/NPFFR2/PNRC1/HNRNPUL1/ERLIN2/PSIP1/EGLN2/ZBED9/CIDEA/SLC51B/ZFP42/ADM/IL31RA/ZNF358/ZNF738/SMYD1/CYLD/ADRB3/ESCO2/ZNF782/ZNF709/ZNF781/CITED4/RNF168/ZNF366/BHLHA15/DNMT3A/DRD4/EEF2/EGFR/EGR3/PATL2/EIF4G1/ELK4/ESR1/SP8/FGF10/FHIT/XRN2/SBNO2/TRAK1/MSRB2/FOXL1/FOXC2/FOXO1/SPG20/NEDD4L/LARP1/PUM2/RYP/VGLL2/MTOR/GABBR1/ZNF549/PABPC1/DNAJC2/DKK3/BMP10/ZNF638/GNAS/ZNF311/ZNF844/GPER1/GRB10/ZBTB44/GTF2B/BRF1/GUCY1A3/SOX8/NRG1/HLX/HMGA1/NR4A1/HPCA/HOXB3/HOXC4/HOXC5/HOXC6/HOXD3/HRH1/ACADL/HSP90AA1/HSP90AB1/TFAP2E/ID3/BARHL2/IGF1/IGF2/CYR61/IL6/IL16/FOXK2/INHBA/IRF1/ISL1/JUP/USP50/HILS1/HES5/AFF3/LDLR/LGALS9/LHCGR/LMNA/LMO2/LTB/SMAD3/MC2R/MEF2D/MEOX1/MEOX2/MITF/LHX8/MOV10/NFATC3/NFYB/NHLH2/NPPC/NTF3/OPRL1/PALM/PARK2/LEF1/PRR16/SIRT6/PITX2/PKHD1/PLAGL1/PML/RIPPLY3/RIPK4/TLR9/CYTL1/POMC/POU2AF1/BNC2/MED18/BANP/PPP1CB/PIWIL2/ELP3/PRMT6/DNAJC17/ZNF532/CNOT11/PRKD1/MYNN/MAPK3/MRAP/PRMT8/HTRA1/PAK6/ARNTL2/RGMA/PRDM11/TENM2/GATAD2B/METTL14/CCAR2/CREBZF/TRIM27/SCT/NPAS3/NOD2/SFRP2/GZF1/SGK1/BMP4/ZNF649/BMPR1B/BRD9/ZSCAN18/SOX9/STAT2/STK3/SUPT6H/TAF4B/TBP/TCEA1/TCEB2/ZEB1/TEAD3/TERF1/TLE3/TLR5/TNFAIP3/TNFRSF1A/TRAFA1/TRAFF5/TWIST1/CCR2/TNFRSF4/UCP1/VARS/WNT10B/ZNF7/ZNF124/ZNF177/PAX8/FZD5/CARD14/ZNF665/ZNF606/ZC3H12A/CPEB4/ZNF436/CALR/SLIRP/SCRT1/HIST1H3A/SLA2/ZNF397/NR0B2/HOPX/KDM2B/LOXL3/CBX2/RAE1/GAS7/RUNX1/TP63/RUNX3/IRS2/ACTN1/FADD/TNFRSF11A/SPHK1/BUD31/CCNA1/LIMD1/PIAS2/LDB2/CBFA2T2/AURKB/ADIPOQ/H2AFY/MICAL2/VGLL4/RAPGEF2/ZBTB39/FGF19/NR1H4                                                                      | 249 |
| GO:0071417 | cellular response to organonitrogen compound           | 56/901  | 619/17046  | 5.97E-05 | 0.00264 | 0.00207 | TCIRG1/ADCY3/AP3S1/CPS1/CYP11A1/DNM3A/EGFR/EGR3/EIF4G1/FGF10/RASA3/FOXC2/FOXO1/AKR1B1/MTOR/FGF22/GNAS/GPER1/GRB10/NRG1/NR4A1/HRH1/IGF2/IL1RN/AQP9/JUP/PIPO5/LCK/NRAS/PARK2/PIK3CG/PRKAG3/TLR9/SSH1/PRKAR1B/LMBRD1/MAPK3/MAP2K2/PSMB4/PSMD7/PTPRE/PXN/RASGRF2/NOD2/SLC8A1/SOX9/VAMP2/ZEB1/WNT10B/CPEB4/MGARP/IRS2/ADIPOQ/RAPGEF2/FGF19/NR1H4                                                                                                                                                                                                                                                                                                                                                                                                                                                                                                                                                                                                                                                                                                                                                                                                                                                                                                                                                                                                                                                                                                                                                                                                                                                                                         | 56  |

|            |                                                  |         |            |          |         |         |                                                                                                                                                                                                                                                                                                                                                                                                                                                                                                                                                                                                                                                                                                                                                                                                                                                                                                                                                                                                                                         |     |
|------------|--------------------------------------------------|---------|------------|----------|---------|---------|-----------------------------------------------------------------------------------------------------------------------------------------------------------------------------------------------------------------------------------------------------------------------------------------------------------------------------------------------------------------------------------------------------------------------------------------------------------------------------------------------------------------------------------------------------------------------------------------------------------------------------------------------------------------------------------------------------------------------------------------------------------------------------------------------------------------------------------------------------------------------------------------------------------------------------------------------------------------------------------------------------------------------------------------|-----|
| GO:0045778 | positive regulation of ossification              | 14/901  | 79/17046   | 6.02E-05 | 0.00264 | 0.00207 | GNAS/IGF1/CYR61/IL6/SMAD3/NPPC/PRKD1/SFRP2/BMP4/SLC8A1/BMPR1B/WNT10B/IFITM1/TP63                                                                                                                                                                                                                                                                                                                                                                                                                                                                                                                                                                                                                                                                                                                                                                                                                                                                                                                                                        | 14  |
| GO:0045597 | positive regulation of cell differentiation      | 66/901  | 768/17046  | 6.48E-05 | 0.00282 | 0.00222 | CCR1/SEZ6/ADM/CTGF/SMYD1/DMBT1/EGR3/EIF4G1/UNC13D/EPHA3/FGA/ACIN1/NEDD4L/MTOR/TENM4/NPTN/BMP10/GNAS/GPER1/SOX8/NRG1/HLX/HOXD3/IGF1/CYR61/IL6/INHBA/KDR/LCK/ARHGDI2/LGALS9/SMAD3/NEU1/NPPC/PALM/PARK2/LEF1/ATP8A2/PLA2G2A/PML/PRKD1/MAP2K2/SFRP2/BMP4/BMPR1B/SOX9/STK3/ZEB1/TEAD3/TWIST1/WNT10B/ZAP70/PAX8/CXCR4/ZC3H12A/CALR/HOPX/IFITM1/SCIN/RUNX1/TP63/FADD/CBFA2T2/ADIPOQ/H2AFY/RAPGEF2                                                                                                                                                                                                                                                                                                                                                                                                                                                                                                                                                                                                                                              | 66  |
| GO:0044281 | small molecule metabolic process                 | 166/901 | 2375/17046 | 6.81E-05 | 0.00294 | 0.00231 | GNE/BCKDK/TCIRG1/MTHFS/PDPN/NPFFR2/ADCY3/SLC27A2/HIBADH/ERLIN2/EGLN2/B4GALT7/ACOT7/CNP/APOA1BP/NEU4/GALM/ADM/EGFLAM/CPS1/NDUFAF6/CRABP1/B3G LCT/CTGF/PPM1L/MBOAT1/ADRB3/CYP11A1/ADAL/DIO3/DLG2/DNMT3A/ABAT/DRD4/AGXT/ENO2/ALAS1/FAH/FHIT/FOXO1/AKR1B1/NUP210/MTOR/FUCA1/SLC37A4/GABBR1/PNKD/ACOT11/GATM/GAPDHS/AMPD2/PDE7B/DKK3/GLS2/AMPD3/DHHDH/GNAS/THEM5/GPER1/GRB10/DNAJC15/GSTP1/GUCY1A3/NME7/PADI1/HAS1/HK1/ACACB/HPCA/HRH1/HSD11B1/ACADL/HSP90AA1/NME9/IGF1/IGF2/IL1RN/IL6/INPP5A/ACAT1/LDLR/LHCGR/MC2R/ME1/ME2/MGAT1/MOCS1/NUDT1/MYH4/NUBP1/NDUFB4/NEU1/ATP1A2/NFYB/NPPC/OAS2/OPRL1/ATP5B/PALM/PARK2/SPOCK3/CHST15/PDE4C/PCYOX1/PDE7A/SIRT6/PDE6B/PGAM2/PIK3CG/PKM/PLA2G2A/PRKAG3/SLCO1C1/PNLP/CYTL1/POMC/PON1/CYP2W1/LPCAT2/PPP1CB/PPP1CC/SMPD3/VAC14/PRKAR1B/LMBRD1/CSGALNACT1/PRKD1/APOBR/MAPK3/MRAP/PSMB4/PSMD7/RDH14/SCT/STRA6/CERK/SLC4A1/VAMP2/TNFRSF1A/TNXB/PHLDA2/TWIST1/CCR2/UCP1/UPP1/VARS/CA7/CACNA1E/PAX8/CERS4/QTRT1/NR0B2/RAE1/KMO/IRS2/ALDH1A2/SYNN2/SPHK1/CH25H/SLC16A3/ADIPOQ/ENTPD3/NUP93/LPGAT1/FGF19/NR1H4 | 166 |
| GO:0001568 | blood vessel development                         | 50/901  | 536/17046  | 6.89E-05 | 0.00295 | 0.00232 | CDH13/LECT1/ESM1/CHI3L1/ADM/CTGF/EGR3/EPHA1/EPHB4/FGF10/VASH1/FOXO2/FOXO1/FLVCR1/ANXA2/NR4A1/HOXB3/CYR61/IL6/ISL1/ITGA7/KDR/LOX/MEOX2/NFATC3/NOV/ATP5B/LEF1/ANGPT4/PIK3CG/PITX2/PML/ROBO4/PARVA/PRKD1/ACTA2/CCL11/STRA6/SFRP2/BMP4/TNFAIP3/TWIST1/CCR2/FZD5/ZC3H12A/COL18A1/RUNX1/ALDH1A2/SPHK1/RAPGEF2                                                                                                                                                                                                                                                                                                                                                                                                                                                                                                                                                                                                                                                                                                                                 | 50  |
| GO:0022603 | regulation of anatomical structure morphogenesis | 70/901  | 830/17046  | 7.01E-05 | 0.00298 | 0.00234 | PDPN/DMRT2/TBR1/LECT1/CHI3L1/ADM/SH3D19/CYLD/COCH/UNC13D/EPHA1/EPHA3/ESR1/FGA/FGF10/VASH1/FOXO2/SPG20/EPB41L3/NEDD4L/ARHGFE18/TENM4/GAS2/BMP10/SOX8/RSPO2/BARHL2/IL1RN/IL6/ISL1/ITGA7/ITGB2/KDR/ARHGDI2/SMAD3/MF12/PALM/PARK2/LEF1/ANGPT4/PML/SSH1/FBLIM1/PALMD/LIMS2/PARVA/PRKD1/MAP2K2/CDC42SE1/ERMN/PXN/CCL11/SFRP2/BMP4/SOX9/TNFAIP3/TWIST1/CCR2/PAX8/LST1/CALR/CAPZB/TTBK1/GAS7/RUNX1/SPHK1/LIMD1/ADIPOQ/RAPGEF2/ULK2                                                                                                                                                                                                                                                                                                                                                                                                                                                                                                                                                                                                              | 70  |
| GO:0019220 | regulation of phosphate metabolic process        | 117/901 | 1568/17046 | 7.23E-05 | 0.00305 | 0.0024  | ABI1/FARP1/CDKN1C/NPFFR2/ADCY3/CHI3L1/CCR1/MAP3K8/ADM/IL31RA/CTGF/ADRB3/NLRP6/DLG2/DRD4/EGFR/EPHA1/FGA/FGF10/RASA3/PPM1E/FOXO1/MAPK8IP2/MTOR/GABBR1/GAPDHS/FGF22/NPTN/BMP10/GNAS/GPER1/DOK7/GRB10/DNAJC15/GSTP1/GUCY1A3/ANXA2/NRG1/HPCA/HRH1/HSP90AB1/IGF1/IGF2/CYR61/IL1RN/IL6/INHBA/ISL1/ITGB2/KDR/HE55/LCK/LDLR/LGALS9/LHCGR/SMAD3/MC2R/ME1/ME2/MAP3K1/NPPC/NRAS/NTF3/OPRL1/PALM/PARK2/ANGPT4/SIRT6/PGAM2/PIK3CG/PKHD1/PLA2G2A/PML/TLR9/ELP3/PPP2R2B/VAC14/PRKAR1B/PRKD1/MAPK3/MAP2K2/MRAP/SLAMF8/PSMB4/PAK6/PSMD7/PXN/RASGRF2/TRIM27/SCT/CCL11/CCL17/NOD2/SFRP2/BMP4/SOX9/STK3/STK10/TNFAIP3/TNFRSF1A/TNXB/TWIST1/CCR2/TNFRSF4/YWHAG/CXCR4/FZD5/CARD14/CDK10/IRS2/TNFRSF11A/SPHK1/MAP3K6/ADIPOQ/H2AFY/RAPGEF2/FGF19                                                                                                                                                                                                                                                                                                                 | 117 |
| GO:0006753 | nucleoside phosphate metabolic process           | 56/901  | 624/17046  | 7.43E-05 | 0.00311 | 0.00245 | GNE/TCIRG1/NPFFR2/ADCY3/ACOT7/CNP/APOA1BP/ADM/ADRB3/ADAL/DLG2/DRD4/ENO2/FHIT/GABBR1/GAPDHS/AMPD2/PDE7B/AMPD3/GNAS/GPER1/DNAJC15/GUCY1A3/NME7/HK1/ACACB/HPCA/NME9/IGF1/LHCGR/MC2R/ME1/ME2/MGAT1/NUDT1/MYH4/NDUFB4/ATP1A2/NPPC/OAS2/OPRL1/ATP5B/PALM/PDE4C/PDE7A/SIRT6/PDE6B/PGAM2/PKM/CSGALNACT1/MRAP/SCT/CCR2/UPP1/KMO/ENTPD3                                                                                                                                                                                                                                                                                                                                                                                                                                                                                                                                                                                                                                                                                                           | 56  |
| GO:0070371 | ERK1 and ERK2 cascade                            | 27/901  | 228/17046  | 7.47E-05 | 0.00311 | 0.00245 | CHI3L1/CCR1/CTGF/NLRP6/EGFR/FGA/FGF10/GPER1/GSTP1/IGF1/CYR61/IL6/KDR/LGALS9/PKHD1/PLA2G2A/MAPK3/MAP2K2/CCL11/CCL17/NOD2/BMP4/SOX9/TNFRSF11A/ADIPQ/RAPGEF2/FGF19                                                                                                                                                                                                                                                                                                                                                                                                                                                                                                                                                                                                                                                                                                                                                                                                                                                                         | 27  |
| GO:0071407 | cellular response to organic cyclic compound     | 37/901  | 359/17046  | 8.15E-05 | 0.00337 | 0.00265 | ADCY3/CPS1/CYP11A1/EGFR/EGR3/ESR1/FGA/MCL1/GNAS/GPER1/NR4A1/HRH1/HSP90AB1/IL1RN/IL6/INHBA/AQP9/ISL1/JUP/SMAD3/ATP1A2/P2RY6/PARK2/LEF1/PIK3CG/SSH1/BGLAP/BMP4/SLC8A1/WNT10B/NR0B2/TRIM63/MGARP/RAE1/ADIPOQ/RAPGEF2/NR1H4                                                                                                                                                                                                                                                                                                                                                                                                                                                                                                                                                                                                                                                                                                                                                                                                                 | 37  |
| GO:0019221 | cytokine-mediated signaling pathway              | 48/901  | 512/17046  | 8.49E-05 | 0.00349 | 0.00274 | CCR1/IL31RA/EIF4G1/FLNB/NUP210/GSTP1/HLA-B/HLA-DPA1/HLA-E/HLA-F/HSP90AB1/IL1R1/IL1RN/IL6/IL10RA/IL11RA/IL12RB2/IL15RA/IRF1/LTB/OAS2/IL21R/PARK2/PML/IL20RB/MAPK3/PSMB4/PSMD7/CCL11/CCL17/CXCR5/STAT2/BST2/TNFRSF1A/CCR2/TNFRSF4/CXCR4/CARD14/IL1F10/RAE1/IFITM1/FADD/TNFRSF11A/SPHK1/CCR2/RSAD2/ADIPOQ/NUP93                                                                                                                                                                                                                                                                                                                                                                                                                                                                                                                                                                                                                                                                                                                            | 48  |
| GO:0033993 | response to lipid                                | 65/901  | 761/17046  | 8.81E-05 | 0.00359 | 0.00283 | SPON2/GJB6/ADCY3/CNP/ADM/CPS1/CTGF/CYP11A1/CITED4/ZNF366/DNMT3A/DRD4/AGXT/EGFR/EPHA3/ESR1/FGA/FGF10/SBNO2/MCL1/GJB2/GNAS/GPER1/FFAR2/GSTP1/NR4A1/HSD17B2/HTR5A/IL1RN/IL6/IL10RA/IL12RB2/INHBA/ISL1/KCNJ8/LGALS9/LOX/ATP1A2/OPRL1/P2RY6/LEF1/PITX2/PON1/MAPK3/PTGFR/BGLAP/NOD2/BMP4/SLC9A3/SOX9/TIMP3/TLR5/TNFAIP3/WNT10B/RAB7A/ZC3H12A/CALR/NR0B2/TRIM63/MGARP/TNFRSF11A/ALDH1A2/ADIPOQ/LY86/NR1H4                                                                                                                                                                                                                                                                                                                                                                                                                                                                                                                                                                                                                                      | 65  |

|            |                                                   |         |            |          |         |         |                                                                                                                                                                                                                                                                                                                                                                                                                                                                                                                                                                                                                                                                                                                                                                                                                                                                                                                                                                                                                                                                                                                                                                                                                                                                                                                                                                                                                                                                                                                                                                                |     |
|------------|---------------------------------------------------|---------|------------|----------|---------|---------|--------------------------------------------------------------------------------------------------------------------------------------------------------------------------------------------------------------------------------------------------------------------------------------------------------------------------------------------------------------------------------------------------------------------------------------------------------------------------------------------------------------------------------------------------------------------------------------------------------------------------------------------------------------------------------------------------------------------------------------------------------------------------------------------------------------------------------------------------------------------------------------------------------------------------------------------------------------------------------------------------------------------------------------------------------------------------------------------------------------------------------------------------------------------------------------------------------------------------------------------------------------------------------------------------------------------------------------------------------------------------------------------------------------------------------------------------------------------------------------------------------------------------------------------------------------------------------|-----|
| GO:0051171 | regulation of nitrogen compound metabolic process | 253/901 | 3889/17046 | 8.90E-05 | 0.00361 | 0.00284 | ZNF783/CDH13/MBNL2/CDKN1C/C1D/ZBTB18/DMRT2/CELF1/TBR1/NPFFR2/PNRC1/TMED10/HNRNPUL1/ERLIN2/PSIP1/EGLN2/ZBED9/CIDEA/ZFP42/ADM/IL31RA/ZNF358/ZNF738/SMYD1/CYLD/ADRB3/ESCO2/ZNF782/ZNF709/ZNF781/CITED4/RNF168/ZNF366/BHLHA15/DNMT3A/DRD4/EEF2/EGFR/EGR3/PATL2/EIF4G1/ELK4/ESR1/SP8/FGF10/FHIT/XRN2/SBNO2/TRAK1/MSRB2/ACIN1/FOXO1/FOXK2/FOXO1/SPG20/NEDD4L/LARP1/PUM2/RYPB/VGLL2/MTOR/GABBR1/ZNF549/PNKD/GAPDH5/PABPC1/DNAJC2/DKK3/BMP10/ZNF638/GNAS/ZNF311/ZNF844/GPER1/ZBTB44/DNAJC15/GTF2B/BRF1/GUCY1A3/GZMA/SOX8/NRG1/HLX/HMGA1/NR4A1/HPCA/HOXB3/HOXC4/HOXC5/HOXC6/HOXC7/HSP90AA1/HSP90AB1/TFAP2E/ID3/BARHL2/IGF1/IGF2/CYR61/IL6/IL16/FOXK2/INHBA/IRF1/ISL1/JUP/USP50/HILS1/HES5/AFF3/LDLR/LGALS9/LHCGR/LMNA/LMO2/SMAD3/MC2R/ME1/ME2/MEF2D/MEOX1/MEOX2/MITF/LHX8/MOV10/NFATC3/NFYB/NHLH2/NPPC/NTF3/OPRL1/PALM/PARK2/LEF1/PRR16/SIRT6/PGAM2/PITX2/PKHD1/PLAGL1/PML/RIPPLY3/RIPK4/TLR9/CYT11/POMC/POU2AF1/BNC2/MED18/BANP/PIWIL2/ELP3/PRMT6/DNAJC17/ZNF532/CNOT11/PRKD1/MYNN/MAPK3/MRAP/PRMT8/HTRA1/PSMB4/PAK6/ARNTL2/RGMA/PRDM11/PSMD7/TENM2/GATAD2B/METTL14/CCAR2/CREBZF/TRIM27/SCT/NPAS3/NOD2/SFRP2/TRA2B/GZF1/SGK1/BMP4/ZNF649/BMPR1B/BRD9/ZSCAN18/SOX9/STAT2/STK3/SUPT6H/TF4B/TBP/TCEA1/TCEB2/ZEB1/TEAD3/TERF1/TLE3/TLR5/TNFAIP3/TNFRSF1A/TRA1/TRA5/TWIST1/CCR2/TNFRSF4/UCP1/VARS/WNT10B/ZNF7/ZNF124/ZNF177/PAX8/FZD5/CARD14/ZNF665/ZC3H14/ZNF606/ZC3H12A/CPEB4/ZNF436/CALR/SLIRP/SCRT1/HIST1H3A/SLA2/ZNF397/NR0B2/HOPX/KDM2B/LOXL3/CBX2/GAS7/RUNX1/TP63/RUNX3/ACTN1/FADD/TNFRSF11A/SPHK1/BUD31/CCNA1/LIMD1/PIAS2/LDB2/CBFA2T2/AURKB/ADIPOQ/H2AFY/MICAL2/VGLL4/ZBTB39/NR1H4 | 253 |
| GO:0022604 | regulation of cell morphogenesis                  | 44/901  | 457/17046  | 9.06E-05 | 0.00365 | 0.00287 | PDPN/TBR1/SH3D19/CYLD/COCH/UNC13D/EPA3/FGA/SPG20/EPB41L3/NEDD4L/ARHGFE18/GAS2/BARHL2/IL6/ITGA7/ITGB2/KDR/ARHGDI/SMAD3/MFI2/PALM/PARK2/LEF1/SSH1/FBLIM1/PALMD/PARVA/MAP2K2/CDC42SE1/ERMN/PXN/CCL11/SFRP2/TWIST1/PAX8/LST1/CALR/CAPZB/TTBK1/GAS7/LIMD1/RAPGEF2/ULK2                                                                                                                                                                                                                                                                                                                                                                                                                                                                                                                                                                                                                                                                                                                                                                                                                                                                                                                                                                                                                                                                                                                                                                                                                                                                                                              | 44  |
| GO:1901701 | cellular response to oxygen-containing compound   | 79/901  | 975/17046  | 9.23E-05 | 0.00369 | 0.0029  | TCIRG1/SPON2/GJB6/ADCY3/AP3S1/CPS1/CYP11A1/DNMT3A/EGFR/EGR3/EIF4G1/EPA3/ESR1/FGF10/RASA3/SBNO2/FOXK2/FOXO1/AKR1B1/MLC1/MTOR/FGF22/GNAS/GPER1/FFAR2/GRB10/GSTP1/NRG1/NR4A1/IGF2/IL1R1/IL1RN/IL6/AQP2/INHBA/AQP9/JUP/IPOS/LCK/NRAS/P2RY6/PARK2/PIK3CG/PRKAG3/TLR9/SSH1/SYBU/PRKAR1B/LMBRD1/MAPK3/MAP2K2/PSMB4/PSMD7/PTGFR/PTPRE/PXN/RASGRF2/BGLAP/NOD2/SLC8A1/SOX9/VAMP2/ZEB1/TLR5/TNFAIP3/TRPC6/WNT10B/CACNA1E/ZC3H12A/CPEB4/TRIM63/MGAR/IR52/ALDH1A2/ADIPOQ/LY86/RAPGEF2/FGF19/NR1H4                                                                                                                                                                                                                                                                                                                                                                                                                                                                                                                                                                                                                                                                                                                                                                                                                                                                                                                                                                                                                                                                                           | 79  |
| GO:0001649 | osteoblast differentiation                        | 24/901  | 194/17046  | 9.31E-05 | 0.0037  | 0.00291 | GNAS/SOX8/ID3/RSPO2/IGF1/CYR61/IL6/SMAD3/MEF2D/NPPC/ATP5B/LEF1/PRKD1/RDH14/BGLAP/SFRP2/BMP4/BMPR1B/TWIST1/WNT10B/IFITM1/TP63/LIMD1/PIAS2                                                                                                                                                                                                                                                                                                                                                                                                                                                                                                                                                                                                                                                                                                                                                                                                                                                                                                                                                                                                                                                                                                                                                                                                                                                                                                                                                                                                                                       | 24  |
| GO:0002520 | immune system development                         | 65/901  | 763/17046  | 9.51E-05 | 0.00375 | 0.00295 | ABI1/CDKN1C/CCR1/IL31RA/CYLD/ESCO2/RNF168/EEF2/EFNA2/EGR3/EML1/FGF10/SBNO2/ACIN1/FOXO1/FOXK2/FOXO1/AKR1B1/MLC1/MTOR/FGF22/GNAS/GPER1/DOA/HLX/HOXB3/IL6/INHBA/IRF1/KDR/HES5/LCK/LGALS9/LMO2/LTB/SMAD3/MEOX1/MITF/NFATC3/LEF1/PITX2/PML/HERC6/SMPD3/BGLAP/SFRP2/CXCR5/VPS33A/BMP4/STK3/SUPT6H/TCEA1/ZEB1/TNFAIP3/WNT10B/ZAP70/FZD5/C6orf25/SCIN/RUNX1/RUNX3/ACTN1/FADD/TNFRSF11A/RSAD2/CD8A/ADIPOQ/CD79A                                                                                                                                                                                                                                                                                                                                                                                                                                                                                                                                                                                                                                                                                                                                                                                                                                                                                                                                                                                                                                                                                                                                                                         | 65  |
| GO:0051174 | regulation of phosphorus metabolic process        | 117/901 | 1579/17046 | 9.68E-05 | 0.00379 | 0.00298 | ABI1/FARP1/CDKN1C/NPFFR2/ADCY3/CHI3L1/CCR1/MAP3K8/ADM/IL31RA/CTGF/ADRB3/NLRP6/DLG2/DRD4/EGFR/EPA1/FGA/FGF10/RASA3/PPM1E/FOXO1/MAPK8IP2/MTOR/GABBR1/GAPDH5/FGF22/NPTN/BMP10/GNAS/GPER1/DOK7/GRB10/DNAJC15/GSTP1/GUCY1A3/ANXA2/NRG1/HPCA/HRH1/HSP90AB1/IGF1/IGF2/CYR61/IL1RN/IL6/INHBA/ISL1/ITGB2/KDR/HES5/LCK/LDLR/LGALS9/LHCGR/SMAD3/MC2R/ME1/ME2/MAP3K1/NPPC/NRAS/NTF3/OPRL1/PALM/PARK2/ANGPT4/SIRT6/PGAM2/PIK3CG/PKHD1/PLA2G2A/PML/TLR9/ELP3/PPP2R2B/VAC14/PRKAR1B/PRKD1/MAPK3/MAP2K2/MRAP/SLAMF8/PSMB4/PAK6/PSMD7/PXN/RASGRF2/TRIM27/SCT/CCL11/CCL17/NOD2/SFRP2/BMP4/SOX9/STK3/STK10/TNFAIP3/TNFRSF1A/TNXB/TWIST1/CCR2/TNFRSF4/YWHAG/CXCR4/FZD5/CARD14/CDK10/IRS2/TNFRSF11A/SPHK1/MAP3K6/ADIPOQ/H2AFY/RAPGEF2/FGF19                                                                                                                                                                                                                                                                                                                                                                                                                                                                                                                                                                                                                                                                                                                                                                                                                                                         | 117 |
| GO:0002683 | negative regulation of immune system process      | 36/901  | 349/17046  | 9.95E-05 | 0.00386 | 0.00304 | IL31RA/CYLD/NLRP6/A2M/GPER1/HLA-B/HLA-DOA/HLA-E/HLX/ZC3H12D/INHBA/IRF1/HES5/LGALS9/NOV/IL20RB/TLR9/PAG1/MASP1/HTRA1/PSMB4/TRIM27/NOD2/BMP4/SOX9/BPI/BST2/TNFAIP3/CCR2/LST1/NLRX1/ZC3H12A/SLA2/RUNX1/FADD/ADIPOQ                                                                                                                                                                                                                                                                                                                                                                                                                                                                                                                                                                                                                                                                                                                                                                                                                                                                                                                                                                                                                                                                                                                                                                                                                                                                                                                                                                | 36  |

|            |                                    |         |             |          |         |         |                                                                                                                                                                                                                                                                                                                                                                                                                                                                                                                                                                                                                                                                                                                                                                                                                                                                                                                                                                                                                                                                                                                                                                                                                                                                                                                                                                                                                                                                                                                                                                                                                                                                                                                                                                                                                                                                                                                                                                                                                                                                                                                                                                                                                                                                                                                                                                                                                                                                                                                                                                                                                                                                                                                                                                                                                                                                                                                                                                                                                                                                                                                                                                                                                                                                                                                                                                                                                                                                                                                                                                                                                                                                                                                                                                                                                                                                                                                                                                                                                                |     |
|------------|------------------------------------|---------|-------------|----------|---------|---------|--------------------------------------------------------------------------------------------------------------------------------------------------------------------------------------------------------------------------------------------------------------------------------------------------------------------------------------------------------------------------------------------------------------------------------------------------------------------------------------------------------------------------------------------------------------------------------------------------------------------------------------------------------------------------------------------------------------------------------------------------------------------------------------------------------------------------------------------------------------------------------------------------------------------------------------------------------------------------------------------------------------------------------------------------------------------------------------------------------------------------------------------------------------------------------------------------------------------------------------------------------------------------------------------------------------------------------------------------------------------------------------------------------------------------------------------------------------------------------------------------------------------------------------------------------------------------------------------------------------------------------------------------------------------------------------------------------------------------------------------------------------------------------------------------------------------------------------------------------------------------------------------------------------------------------------------------------------------------------------------------------------------------------------------------------------------------------------------------------------------------------------------------------------------------------------------------------------------------------------------------------------------------------------------------------------------------------------------------------------------------------------------------------------------------------------------------------------------------------------------------------------------------------------------------------------------------------------------------------------------------------------------------------------------------------------------------------------------------------------------------------------------------------------------------------------------------------------------------------------------------------------------------------------------------------------------------------------------------------------------------------------------------------------------------------------------------------------------------------------------------------------------------------------------------------------------------------------------------------------------------------------------------------------------------------------------------------------------------------------------------------------------------------------------------------------------------------------------------------------------------------------------------------------------------------------------------------------------------------------------------------------------------------------------------------------------------------------------------------------------------------------------------------------------------------------------------------------------------------------------------------------------------------------------------------------------------------------------------------------------------------------------------------|-----|
| GO:0008152 | metabolic process                  | 624/901 | 10817/17046 | 9.98E-05 | 0.00386 | 0.00304 | AKT3/ABI1/CDH3/GNE/ZNF783/TSPAN5/CDH13/SUGP2/MBNL2/FARP1/RCAN2/CDKN1C/SPEG/BCKDK/TCIRG1/ABCA9/C1D/ZBTB18/PITRM1/MTHFS/PDPN/DMRT2/CELF1/CELF2/TBR1/HCTSP/NPFFR2/ADCY3/PNRC1/TMED10/SLC27A2/LECT1/ADAM29/HNRNPUL1/RPP14/HIBADH/CHI3L1/ERLIN2/PSIP1/CHI3L2/EGLN2/B4GALT7/KIF12/ACOT7/EXOC3/ADPRHL1/CARD16/ZBED9/CIDEA/GBP4/ALPK2/GALNT15/CLCA1/CLN5/MRPL52/CCR1/SLC51B/CNP/AADACL3/APOA1BP/NEU4/COL9A3/COL11A1/GALM/MAP3K8/ZFP42/ADM/IL131RA/EGFLAM/UBLCP1/HUS1B/CPD/CPM/CP51/NDUF66/PXDNL/CRABP1/ZNF358/TRPM6/MI82/PARP4/LDLRAD3/B3GLCT/MGAT5B/CSTA/KLC3/ZNF738/CTGF/SMYD1/PPM1L/SH3D19/CYB561/CYLD/MBOAT1/ADRB3/ESCO2/CYP11A1/ZNF782/FITM1/ADAL/ZNF709/ZNF781/CITED4/DBB1/LONRF2/DDOST/RNF168/ZNF366/BHLHA15/NLRP6/DIO3/DLG2/DNAH6/DNAH8/DNMT3A/ABAT/DPH1/DRD4/ECE1/AGXT/EEF2/EGFR/EGR3/PATL2/EIF4G1/A2M/ELK4/LIPH/DNAH12/ENO2/ADCK5/EPHA1/EPHA3/EPH8A/ESR1/ALAS1/F11/FAH/SPATA13/PRSS54/RNF182/PHACTR1/SP8/FGA/FGF10/FHIT/XRN2/RASA3/PPM1E/SBNO2/TRAK1/MSRB2/ACIN1/FOXO1/FOXO2/TBC1D9B/FOXO1/AKR1B1/GGA3/DIP2A/FLOT2/TBC1D1/NUP210/ATP11A/NEDD4L/PSD3/LARP1/PUM2/ARHGFE18/RYPB/MORC3/MAK8IP2/TSSK2/VGLL2/MTOR/FUCA1/SLC37A4/GABBR1/RASGEF1C/RNF144B/ZNF549/ST6GALNAC3/GAK/SAMM50/ALS2CL/PNKC/TENM4/ACOT11/LTN1/RGS22/STEAP2/FBXL21/FBXO2/LCE2B/SACS/GATM/GBGT1/GAPDHS/SLC17A5/RPS6KC1/PABPC1/DNAJC2/FGF22/NPTN/AMPD2/PDE7B/DKK3/CYTH4/GLS2/VPS4A/AMPD3/DHHD/BMP10/ZNF638/GNAS/ZNF311/TMPRSS12/PIGW/ZNF844/THEM5/GPER1/EOGT/DOK7/GRB10/MRPS18B/ZBTB44/DNAJC15/GSTP1/GT F2B/BRF1/GUCY1A3/NME7/PAD1/GZMA/ANXA2/HAS1/SERPIND1/SOX8/NRG1/HK1/HLX/HMGA1/NR4A1/ACACB/HPCA/APBA2/HOXB3/HOXC4/HOXC5/HOXC6/HOXC7/HOXC8/HOXC9/AGFG2/H RH1/HSD11B1/HSD17B2/ACADL/HSPA1L/HSP90AA1/HSP90AB1/DUPD1/ADAMTSL5/TFAP2E/ID3/ZC3H12D/COL28A1/FMN1/BARHL2/NME9/IGF1/IGF2/CYR61/LCE1C/LCE1D/LCE2 D/IL1RN/IL6/IL12RB2/PRSS41/IL16/FOXK2/INHBA/INPP5A/IRF1/AQP9/ISL1/ITGB2/ITIH3/ITIH4/IVL/JUP/USP50/HILS1/ATP9B/KCNH2/KDR/ACAT1/KIF25/IPO5/KRT15/HES5/AFF3/L CK/MUC21/LDLR/ARHGDI/LGALS9/LHCGR/LGL1/LMNA/LMO2/LOX/LTB/SMAD3/MC2R/ME1/ME2/MEF2D/MAP3K1/MEOX1/MEOX2/MF1/MFNG/MGAT1/MITF/LHX8/MOCS1/ MOV10/PLEKHG7/NUDT1/MYH4/NUBP1/NDUFB4/DRG1/NEU1/ATP1A2/NFATC3/NFYB/NHLH2/NOV/NPPC/NRAS/NTF3/OAS2/OPRL1/PAFAH2/ATP5B/PALM/ARHGFE3/PARK2/SP OCK3/UTP11L/LEF1/DDX47/PRR16/CHST15/ANGPT4/PDE4C/PCYOX1/PDE7A/CPEB4/PDE6B/ATP8A2/GALNT7/PGAM2/PI3/PIGC/PIK3CG/PITX2/PKH1/PKM/PLA2G2A/PLAGL1/PRK AG3/PML/RIPPLY3/SLCO1C1/PNLIP/RIPK4/TLR9/TREM1/CYTL1/POMC/SSH1/PON1/RIN2/MOV10L1/POU2AF1/ZDHC13/BNC2/MED18/CYP2W1/RPP25/LPCAT2/BANP/PPP1CB/HE RC6/PPP1CC/PIWIL2/ELP3/ARHGFE10L/PRMT6/DNAJC17/ZNF532/PPP2R2B/FANCI/WDR33/SMAD3/CNOT11/VAC14/CARKD/PRKAR1B/LMBRD1/CSGALNACT1/CISD1/PRKD1/WSB2 /MYNN/APOBR/MAPK3/MAP2K2/PROC/MRAP/PRMT8/MASP1/HTRA1/SLAMF8/CDC42SE1/PSMB4/PAK6/ARNTL2/RGMA/PRDM11/PSMD7/PTGFR/PLEKHG5/TENM2/GATAD2B/KL HL8/RDH14/METTL14/MARK4/CCAR2/PTPRE/PXN/CREBZF/ABHD17C/ACTA2/RASGRF2/RFC2/TRIM27/RGR/RGS12/EXOC4/RPA3/RPL8/RPL29/SCT/CCL11/CCL17/ABHD4/MRPS14/P RSS22/NPAS3/NOD2/STRA6/SFRP2/MAP1LC3B2/ARHGAP9/TRA2B/GZF1/DNAI2/SGK1/MICAL1/CERK/VPS33A/BMP4/SLC4A1/ZNF649/BMPR1B/BRD9/ZSCAN18/BOK/SOX9/SRP68/ STAT2/STK3/STK10/SUPT6H/BST2/VAMP2/TAFA4B/TBP/TCEA1/TCEB2/ZEB1/ACT1/TEAD3/TERF1/TGM2/TIMP3/TLE3/TLR5/TNFAIP3/TNFRSF1A/TNXP/TRA1/TRA5/TRPM2/PHL D A2/TWIST1/CCR2/TNFRSF4/UCP1/UPP1/VARS/WNT10B/YWHAG/ZAP70/ZNF7/CA7/ZNF124/ZNF177/CACNA1E/PTP4A1/MOGS/PAX8/CXCR4/FZD5/RAB7A/ER13/CARD14/GDPD3/C ERS4/ZNF665/EPHX3/ZC3H14/ERMP1/TMEM62/ZNF606/ZC3H12A/FAAP100/CPEB4/PDE6B/ATP8A2/GALNT7/PGAM2/PI3/PIGC/PIK3CG/PITX2/PKH1/PKM/PLA2G2A/PLAGL1/PRK DYNLRB2/SLA2/ATP13A4/ZNF397/NROB2/HOPX/TTBK1/SPINK7/TRIM63/KDM2B/LOXL3/GTPBP3/CBX2/RAE1/GAS7/CDK10/KMO/RUNX1/TP63/RUNX3/SERPINA6/IRS2/ACTN1/CR ADD/FADD/TNFRSF11A/ALDH1A2/STK19/SYNJ2/SPHK1/BUD31/CCNA1/ENDOU/STBD1/LIMD1/CH25H/ERI1/STARD13/PIAS2/ZFAND2A/MAP3K6/LDB2/SLC16A3/CBFA2T2/RSAD2/ AURKB/DAPL1/CCDC102A/NEURL3/SDR42E1/ADIPQ/ARHGAP29/RAB3D/H2AFY/ENTPD3/PREPL/ARHGFE10/MICAL2/N4BP1/VGLL4/NUP93/RAPGEF2/ULK2/USP6N/ZBTB39/RAB GAP1L/IQSECI/LPGAT1/FGF19/NR1H4 | 624 |
| GO:0002062 | chondrocyte differentiation        | 15/901  | 93/17046    | 0.0001   | 0.00392 | 0.00308 | COL11A1/FAM101A/CTGF/SMAD3/MEF2D/NOV/NPPC/CYTL1/SFRP2/BMP4/BMPR1B/SOX9/WNT10B/SCIN/RUNX3                                                                                                                                                                                                                                                                                                                                                                                                                                                                                                                                                                                                                                                                                                                                                                                                                                                                                                                                                                                                                                                                                                                                                                                                                                                                                                                                                                                                                                                                                                                                                                                                                                                                                                                                                                                                                                                                                                                                                                                                                                                                                                                                                                                                                                                                                                                                                                                                                                                                                                                                                                                                                                                                                                                                                                                                                                                                                                                                                                                                                                                                                                                                                                                                                                                                                                                                                                                                                                                                                                                                                                                                                                                                                                                                                                                                                                                                                                                                       | 15  |
| GO:0009117 | nucleotide metabolic process       | 55/901  | 617/17046   | 0.0001   | 0.00392 | 0.00308 | GNE/TCIRG1/NPFFR2/ADCY3/ACOT7/CNP/APOA1BP/ADM/ADRB3/ADAL/DLG2/DRD4/ENO2/FHIT/GABBR1/GAPDHS/AMPD2/PDE7B/AMPD3/GNAS/GPER1/DNAJC15/GUCY1A3/N ME7/HK1/ACACB/HPCA/NME9/IGF1/LHCGR/MC2R/ME1/ME2/MGAT1/NUDT1/MYH4/NDUFB4/ATP1A2/NPPC/OAS2/OPRL1/ATP5B/PALM/PDE4C/PDE7A/SIRT6/PDE6B/PGAM2/P KM/CSGALNACT1/MRAP/SCT/CCR2/UPP1/KMO                                                                                                                                                                                                                                                                                                                                                                                                                                                                                                                                                                                                                                                                                                                                                                                                                                                                                                                                                                                                                                                                                                                                                                                                                                                                                                                                                                                                                                                                                                                                                                                                                                                                                                                                                                                                                                                                                                                                                                                                                                                                                                                                                                                                                                                                                                                                                                                                                                                                                                                                                                                                                                                                                                                                                                                                                                                                                                                                                                                                                                                                                                                                                                                                                                                                                                                                                                                                                                                                                                                                                                                                                                                                                                       | 55  |
| GO:0006935 | chemotaxis                         | 67/901  | 796/17046   | 0.00011  | 0.004   | 0.00315 | CDH13/SPON2/TBR1/CHGA/CCR1/COL9A3/EFNA2/EGFR/EGR3/EPHA1/EPHA3/EPH8A/FGF10/RASA3/NFASC/FGF22/FFAR2/SERPIND1/NRG1/NR4A1/HRH1/HSP90AA1/HSP90AB1/ CYR61/IL6/IL16/ISL1/ITGB2/KDR/LGALS9/SMAD3/NOV/NRAS/NTF3/LEF1/PIK3CG/TREM1/PARVA/PRKD1/MAPK3/MAP2K2/PSMB4/RGMA/TRPC7/PSMD7/PLEKHG5/TENM2/RASG RF2/CCL11/CCL17/NOD2/CXCR5/BMP4/BMPR1B/SLIT1/TRPC4/TRPC6/CCR2/CACNB2/CXCR4/CALR/RUNX3/IRS2/TNFRSF11A/CCR2/RAPGEF2/FGF19                                                                                                                                                                                                                                                                                                                                                                                                                                                                                                                                                                                                                                                                                                                                                                                                                                                                                                                                                                                                                                                                                                                                                                                                                                                                                                                                                                                                                                                                                                                                                                                                                                                                                                                                                                                                                                                                                                                                                                                                                                                                                                                                                                                                                                                                                                                                                                                                                                                                                                                                                                                                                                                                                                                                                                                                                                                                                                                                                                                                                                                                                                                                                                                                                                                                                                                                                                                                                                                                                                                                                                                                            | 67  |
| GO:0042330 | taxis                              | 67/901  | 796/17046   | 0.00011  | 0.004   | 0.00315 | CDH13/SPON2/TBR1/CHGA/CCR1/COL9A3/EFNA2/EGFR/EGR3/EPHA1/EPHA3/EPH8A/FGF10/RASA3/NFASC/FGF22/FFAR2/SERPIND1/NRG1/NR4A1/HRH1/HSP90AA1/HSP90AB1/ CYR61/IL6/IL16/ISL1/ITGB2/KDR/LGALS9/SMAD3/NOV/NRAS/NTF3/LEF1/PIK3CG/TREM1/PARVA/PRKD1/MAPK3/MAP2K2/PSMB4/RGMA/TRPC7/PSMD7/PLEKHG5/TENM2/RASG RF2/CCL11/CCL17/NOD2/CXCR5/BMP4/BMPR1B/SLIT1/TRPC4/TRPC6/CCR2/CACNB2/CXCR4/CALR/RUNX3/IRS2/TNFRSF11A/CCR2/RAPGEF2/FGF19                                                                                                                                                                                                                                                                                                                                                                                                                                                                                                                                                                                                                                                                                                                                                                                                                                                                                                                                                                                                                                                                                                                                                                                                                                                                                                                                                                                                                                                                                                                                                                                                                                                                                                                                                                                                                                                                                                                                                                                                                                                                                                                                                                                                                                                                                                                                                                                                                                                                                                                                                                                                                                                                                                                                                                                                                                                                                                                                                                                                                                                                                                                                                                                                                                                                                                                                                                                                                                                                                                                                                                                                            | 67  |
| GO:0048878 | chemical homeostasis               | 77/901  | 949/17046   | 0.00011  | 0.00407 | 0.0032  | TCIRG1/TRDN/GJB6/ADCY3/CLN5/CCR1/ADM/CP51/DBB1/BHLHA15/DRD4/ESR1/FOXO1/NEDD4L/SLC37A4/STEAP2/NPTN/GNAS/GPER1/FFAR2/FLVCR1/GSTP1/ANXA6/HK1/ACAD L/IGF1/IL1R1/IL6/AQP2/AQP5/AQP9/KCNH2/KDR/LCK/LDLR/MFI2/NUBP1/ATP1A2/OPRL1/ATP5B/PARK2/SIRT6/PDE6B/PIK3CG/PKH1/PML/POMC/SLC30A10/CHRNA9/SYBU/PRK AR1B/PRKD1/SLAMF8/TRPC7/CCL11/ABHD4/SGK1/BMP4/SLC4A1/SLC8A1/SLC9A3/TGM2/TRPC4/TRPC6/CCR2/CA7/CACNA1E/CXCR4/RAB7A/CALR/ATP13A4/CASQ1/TP63/IRS2/S MDT1/ADIPQ/MTL5                                                                                                                                                                                                                                                                                                                                                                                                                                                                                                                                                                                                                                                                                                                                                                                                                                                                                                                                                                                                                                                                                                                                                                                                                                                                                                                                                                                                                                                                                                                                                                                                                                                                                                                                                                                                                                                                                                                                                                                                                                                                                                                                                                                                                                                                                                                                                                                                                                                                                                                                                                                                                                                                                                                                                                                                                                                                                                                                                                                                                                                                                                                                                                                                                                                                                                                                                                                                                                                                                                                                                                | 77  |
| GO:0048514 | blood vessel morphogenesis         | 45/901  | 475/17046   | 0.00011  | 0.00408 | 0.00321 | CDH13/LECT1/ESM1/CHI3L1/ADM/CTGF/EGR3/EPHA1/EPH8A/FGF10/VASH1/FOXO2/ANXA2/NR4A1/HOXB3/CYR61/IL6/ISL1/ITGA7/KDR/MEOX2/NFATC3/NOV/ATP5B/LEF1/ANGP T4/PIK3CG/PITX2/PML/ROBO4/PARVA/PRKD1/CCL11/STRA6/SFRP2/BMP4/TNFAIP3/TWIST1/CCR2/FZD5/ZC3H12A/COL18A1/RUNX1/SPHK1/RAPGEF2                                                                                                                                                                                                                                                                                                                                                                                                                                                                                                                                                                                                                                                                                                                                                                                                                                                                                                                                                                                                                                                                                                                                                                                                                                                                                                                                                                                                                                                                                                                                                                                                                                                                                                                                                                                                                                                                                                                                                                                                                                                                                                                                                                                                                                                                                                                                                                                                                                                                                                                                                                                                                                                                                                                                                                                                                                                                                                                                                                                                                                                                                                                                                                                                                                                                                                                                                                                                                                                                                                                                                                                                                                                                                                                                                      | 45  |
| GO:0014706 | striated muscle tissue development | 34/901  | 324/17046   | 0.00011  | 0.00408 | 0.00321 | SPEG/ZBTB18/CHRNA1/COL11A1/SMYD1/FOXO2/FLNB/VGLL2/TENM4/BMP10/SOX8/NRG1/HLX/ISL1/LMNA/SMAD3/MEF2D/MEOX2/MYL2/NFATC3/NRAS/LEF1/SIRT6/PITX2/PLA GL1/BIN3/BMP4/SLC8A1/ACT1/TWIST1/WNT10B/CALR/CASQ1/ALDH1A2                                                                                                                                                                                                                                                                                                                                                                                                                                                                                                                                                                                                                                                                                                                                                                                                                                                                                                                                                                                                                                                                                                                                                                                                                                                                                                                                                                                                                                                                                                                                                                                                                                                                                                                                                                                                                                                                                                                                                                                                                                                                                                                                                                                                                                                                                                                                                                                                                                                                                                                                                                                                                                                                                                                                                                                                                                                                                                                                                                                                                                                                                                                                                                                                                                                                                                                                                                                                                                                                                                                                                                                                                                                                                                                                                                                                                       | 34  |



|            |                                                      |         |            |         |         |         |                                                                                                                                                                                                                                                                                                                                                                                                                                                                                                                                                                                                                                                                                                                                                  |     |
|------------|------------------------------------------------------|---------|------------|---------|---------|---------|--------------------------------------------------------------------------------------------------------------------------------------------------------------------------------------------------------------------------------------------------------------------------------------------------------------------------------------------------------------------------------------------------------------------------------------------------------------------------------------------------------------------------------------------------------------------------------------------------------------------------------------------------------------------------------------------------------------------------------------------------|-----|
| GO:0006164 | purine nucleotide biosynthetic process               | 28/901  | 246/17046  | 0.00011 | 0.00408 | 0.00321 | TCIRG1/NPFFR2/ADCY3/ACOT7/ADM/ADRB3/DRD4/GABBR1/AMPD2/AMPD3/GNAS/GPER1/GUCY1A3/NME7/ACACB/HPCA/NME9/LHCGR/MC2R/NPPC/OAS2/OPRL1/ATP5B/PALM/PKM/MRAP/SCT/CCR2                                                                                                                                                                                                                                                                                                                                                                                                                                                                                                                                                                                      | 28  |
| GO:0072522 | purine-containing compound biosynthetic process      | 29/901  | 259/17046  | 0.00011 | 0.00413 | 0.00324 | TCIRG1/NPFFR2/ADCY3/ACOT7/ADM/ADRB3/ADAL/DRD4/GABBR1/AMPD2/AMPD3/GNAS/GPER1/GUCY1A3/NME7/ACACB/HPCA/NME9/LHCGR/MC2R/NPPC/OAS2/OPRL1/ATP5B/PALM/PKM/MRAP/SCT/CCR2                                                                                                                                                                                                                                                                                                                                                                                                                                                                                                                                                                                 | 29  |
| GO:0007010 | cytoskeleton organization                            | 80/901  | 997/17046  | 0.00011 | 0.00415 | 0.00326 | ABI1/TRDN/TACC2/CNP/FAM101A/CTGF/SGOL1/SH3D19/CYLD/EML1/EPHA1/EPHA3/PHACTR1/FGF10/PPM1E/MRSB2/LIMCH1/EPB41L3/FLNB/SYNE1/ARHGEF18/MTOR/PLEK2/BMP10/TMOD4/FMN1/JUP/INSC/STMN1/LCP1/LLGL1/LMNA/SMAD3/MAP3K1/MYL2/NUBP1/NEDD9/NTF3/PALM/PARK2/ATP8A2/PKHD1/SSH1/PARVA/TTC17/BIN3/MAPK3/PAK6/ACTR3B/ERMN/MARK4/PXN/TRIM27/CCL11/PARVG/DNAI2/MICAL1/SOX9/BST2/ACTC1/TERF1/TCHH/TNXB/CALR/CAPZB/SH3BGL3/ANTXR1/BFSP2/CASQ1/GAS7/SCIN/ACTN1/LIMD1/MAP7/PRC1/AURKB/TRIP10/ARHGEF10/MICAL2/IQSEC1                                                                                                                                                                                                                                                          | 80  |
| GO:0008284 | positive regulation of cell proliferation            | 64/901  | 753/17046  | 0.00011 | 0.00415 | 0.00326 | CDH3/CDH13/TCIRG1/ESM1/ADM/IL13RA/CTGF/EGFR/EGR3/EPHA1/ESR1/FGF10/AKR1B1/MTOR/BMP10/GPER1/ANXA2/SOX8/NRG1/HLA-DPA1/HLA-E/HLX/NR4A1/IGF1/IGF2/CYR61/IL6/IL12RB2/ISL1/KDR/HES5/NRAS/NTF3/LEF1/SIRT6/PITX2/PKHD1/PML/PRKD1/HTRA1/PTGFR/S100A6/CCL11/NOD2/SFRP2/BMP4/SOX9/TNFAIP3/TRAF5/TWIST1/CCR2/TNFRSF4/WNT10B/ZAP70/COL18A1/CALR/TP63/IRS2/FADD/TNFRSF11A/ALDH1A2/SPHK1/PRC1/FGF19                                                                                                                                                                                                                                                                                                                                                              | 64  |
| GO:0048589 | developmental growth                                 | 48/901  | 519/17046  | 0.00012 | 0.00423 | 0.00333 | CDKN1C/CELF1/CHRNA1/COMP/ADM/ADRB3/DIO3/DMBT1/ESR1/FGF10/FOXC2/SPG20/NEDD4L/TENM4/GATM/BMP10/GNAS/FLVCR1/NRG1/HLX/ACACB/APBA2/RSPO2/FMN1/BARHL2/IGF1/SMAD3/NOV/NPPC/PARK2/SIRT6/ATP8A2/PKM/BNC2/BIN3/CCL11/STRA6/SFRP2/BMP4/BMP1B/SLIT1/SOX9/STK3/TIMP3/WNT10B/COLQ/HOPX/ULK2                                                                                                                                                                                                                                                                                                                                                                                                                                                                    | 48  |
| GO:0046649 | lymphocyte activation                                | 50/901  | 548/17046  | 0.00012 | 0.00424 | 0.00334 | MAP3K8/CYLD/DDOST/RNF168/EGR3/UNC13D/FGF10/FLOT2/MTOR/HLA-DOA/HLA-DPA1/HLA-E/HLX/ZC3H12D/IGF1/IGF2/IL6/INHBA/IRF1/ITGB2/LCK/LCP1/LGALS9/SMAD3/NFATC3/IL21R/LEF1/PIK3CG/IL20RB/APBB1P/PAG1/NOD2/CXCR5/BMP4/SUPT6H/BST2/ZEB1/TNFAIP3/CCR2/TNFRSF4/ZAP70/FZD5/LST1/SLA2/IRS2/FADD/SKAP2/RSAD2/CD8A/CD79A                                                                                                                                                                                                                                                                                                                                                                                                                                            | 50  |
| GO:0009891 | positive regulation of biosynthetic process          | 123/901 | 1685/17046 | 0.00012 | 0.00424 | 0.00334 | CDH3/CDH13/CDKN1C/DMRT2/TBR1/ERLIN2/PSIP1/SLC51B/ADM/IL13RA/CTGF/ADRB3/CITED4/BHLHA15/EEF2/EGFR/ESR1/FGF10/SBNO2/FOXC2/FOXO1/LARP1/VGLL2/MTOR/PABPC1/DNAJC2/BMP10/GNAS/GPER1/BRF1/GUCY1A3/SOX8/HMGA1/NR4A1/HPCA/HRH1/HSP90AA1/HSP90AB1/TFAP2E/BARHL2/IGF1/IGF2/CYR61/IL6/FOXK2/INHBA/IRF1/ISL1/JUP/KDR/HES5/LDLR/LGALS9/LHCGR/LMNA/LMO2/LTB/SMAD3/MC2R/MEF2D/MEOX1/MEOX2/MITF/NFATC3/NFYB/NHLH2/NPPC/NTF3/PARK2/LEF1/PRR16/PITX2/PLAGL1/RIPK4/TLR9/CYTL1/POMC/BANP/PIWIL2/PRKD1/MAPK3/MRAP/ARNTL2/RGMA/TRIM27/SCT/NPAS3/NOD2/SFRP2/BMP4/ZNF649/BMP1B/SOX9/STK3/SUPT6H/TBP/TCEA1/TCEB2/ZEB1/TEAD3/TLR5/TNFRSF1A/TRAFA1/TRAFA5/TWIST1/CCR2/WNT10B/PAX8/FZD5/CARD14/CALR/RUNX1/TP63/RUNX3/IRS2/FADD/TNFRSF11A/SPHK1/PIAS2/LDB2/CBFA2T2/MICAL2/NR1H4 | 123 |
| GO:0019725 | cellular homeostasis                                 | 62/901  | 725/17046  | 0.00012 | 0.00435 | 0.00342 | TCIRG1/TRDN/GJB6/EGLN2/CHRNA1/CLN5/CCR1/ADM/DRD4/ESR1/FOXO1/NEDD4L/NPTN/GPER1/FLVCR1/ANXA6/HK1/NME9/IL1R1/IL6/AQP2/AQP5/AQP9/LCK/NUBP1/ATP1A2/OPRL1/ATP5B/PARK2/PDE6B/PIK3CG/PKHD1/PML/SLC30A10/CHRNA9/SYBU/PRKD1/SLAMF8/TRPC7/RFC2/RPA3/CCL11/SGK1/BMP4/SLC4A1/SLC8A1/TERF1/TGM2/TRPC4/TRPC6/CCR2/CA7/CACNA1E/CXCR4/RAB7A/CALR/SH3BGL3/ATP13A4/CASQ1/IRS2/SMMD1/MTL5                                                                                                                                                                                                                                                                                                                                                                            | 62  |
| GO:0046058 | cAMP metabolic process                               | 20/901  | 150/17046  | 0.00013 | 0.00435 | 0.00342 | NPFFR2/ADCY3/ADM/ADRB3/DRD4/GABBR1/PDE7B/GNAS/GPER1/HPCA/LHCGR/MC2R/NPPC/OPRL1/PALM/PDE4C/PDE7A/MRAP/SCT/CCR2                                                                                                                                                                                                                                                                                                                                                                                                                                                                                                                                                                                                                                    | 20  |
| GO:0010562 | positive regulation of phosphorus metabolic process  | 84/901  | 1062/17046 | 0.00013 | 0.00435 | 0.00342 | ABI1/ADCY3/CHI3L1/CCR1/MAP3K8/ADM/IL13RA/CTGF/ADRB3/DRD4/EGFR/FGA/FGF10/RASA3/MAPK8IP2/MTOR/GAPDH5/FGF22/NPTN/BMP10/GNAS/GPER1/DOK7/GRB10/GUCY1A3/ANXA2/NRG1/HPCA/HRH1/HSP90AB1/IGF1/IGF2/CYR61/IL1RN/IL6/INHBA/ISL1/KDR/HES5/LCK/LGALS9/LHCGR/SMAD3/MC2R/MAP3K1/NPPC/NRAS/NTF3/OPRL1/ANGPT4/PIK3CG/PLA2G2A/TLR9/PRKAR1B/PRKD1/MAPK3/MAP2K2/MRAP/PSMB4/PAK6/PSMD7/PXN/RASGRF2/SCT/CCL11/CCL17/NOD2/SFRP2/BMP4/SOX9/STK3/STK10/TNFRSF1A/CXCR4/FZD5/CARD14/CDK10/IRS2/TNFRSF11A/SPHK1/MAP3K6/ADIPOQ/RAPGEF2/FGF19                                                                                                                                                                                                                                  | 84  |
| GO:0045937 | positive regulation of phosphate metabolic process   | 84/901  | 1062/17046 | 0.00013 | 0.00435 | 0.00342 | ABI1/ADCY3/CHI3L1/CCR1/MAP3K8/ADM/IL13RA/CTGF/ADRB3/DRD4/EGFR/FGA/FGF10/RASA3/MAPK8IP2/MTOR/GAPDH5/FGF22/NPTN/BMP10/GNAS/GPER1/DOK7/GRB10/GUCY1A3/ANXA2/NRG1/HPCA/HRH1/HSP90AB1/IGF1/IGF2/CYR61/IL1RN/IL6/INHBA/ISL1/KDR/HES5/LCK/LGALS9/LHCGR/SMAD3/MC2R/MAP3K1/NPPC/NRAS/NTF3/OPRL1/ANGPT4/PIK3CG/PLA2G2A/TLR9/PRKAR1B/PRKD1/MAPK3/MAP2K2/MRAP/PSMB4/PAK6/PSMD7/PXN/RASGRF2/SCT/CCL11/CCL17/NOD2/SFRP2/BMP4/SOX9/STK3/STK10/TNFRSF1A/CXCR4/FZD5/CARD14/CDK10/IRS2/TNFRSF11A/SPHK1/MAP3K6/ADIPOQ/RAPGEF2/FGF19                                                                                                                                                                                                                                  | 84  |
| GO:0031328 | positive regulation of cellular biosynthetic process | 121/901 | 1655/17046 | 0.00013 | 0.00441 | 0.00347 | CDH3/CDH13/CDKN1C/DMRT2/TBR1/ERLIN2/PSIP1/SLC51B/ADM/IL13RA/ADRB3/CITED4/BHLHA15/EEF2/EGFR/ESR1/FGF10/SBNO2/FOXC2/FOXO1/LARP1/VGLL2/MTOR/PABPC1/DNAJC2/BMP10/GNAS/GPER1/BRF1/GUCY1A3/SOX8/HMGA1/NR4A1/HPCA/HRH1/HSP90AA1/HSP90AB1/TFAP2E/BARHL2/IGF1/IGF2/CYR61/IL6/FOXK2/INHBA/IRF1/ISL1/JUP/HES5/LDLR/LGALS9/LHCGR/LMNA/LMO2/LTB/SMAD3/MC2R/MEF2D/MEOX1/MEOX2/MITF/NFATC3/NFYB/NHLH2/NPPC/NTF3/PARK2/LEF1/PRR16/PITX2/PLAGL1/RIPK4/TLR9/CYTL1/POMC/BANP/PIWIL2/PRKD1/MAPK3/MRAP/ARNTL2/RGMA/TRIM27/SCT/NPAS3/NOD2/SFRP2/BMP4/ZNF649/BMP1B/SOX9/STK3/SUPT6H/TBP/TCEA1/TCEB2/ZEB1/TEAD3/TLR5/TNFRSF1A/TRAFA1/TRAFA5/TWIST1/CCR2/WNT10B/PAX8/FZD5/CARD14/CALR/RUNX1/TP63/RUNX3/IRS2/FADD/TNFRSF11A/SPHK1/PIAS2/LDB2/CBFA2T2/MICAL2/NR1H4          | 121 |

|            |                                                     |         |            |         |         |         |                                                                                                                                                                                                                                                                                                                                                                                                                                                                                                                                                                                                                                                                                                                                                                                                                                                                                                                                                                                                                                                                                                                                                                                                                                                                                                                                                                                                                                                                                                                                                                  |     |
|------------|-----------------------------------------------------|---------|------------|---------|---------|---------|------------------------------------------------------------------------------------------------------------------------------------------------------------------------------------------------------------------------------------------------------------------------------------------------------------------------------------------------------------------------------------------------------------------------------------------------------------------------------------------------------------------------------------------------------------------------------------------------------------------------------------------------------------------------------------------------------------------------------------------------------------------------------------------------------------------------------------------------------------------------------------------------------------------------------------------------------------------------------------------------------------------------------------------------------------------------------------------------------------------------------------------------------------------------------------------------------------------------------------------------------------------------------------------------------------------------------------------------------------------------------------------------------------------------------------------------------------------------------------------------------------------------------------------------------------------|-----|
| GO:0018130 | heterocycle biosynthetic process                    | 253/901 | 3911/17046 | 0.00013 | 0.00447 | 0.00352 | ZNF783/CDH13/CDKN1C/TCIRG1/C1D/ZBTB18/MTFHS/DMRT2/TBR1/NPFFR2/ADCY3/PNRC1/HNRNPUL1/ERLIN2/PSIP1/EGLN2/ACOT7/ZBED9/CIDEA/ZFP42/ADM/IL31RA/CPS1/ZNF358/ZNF738/CTGF/SMYD1/CYLD/ADRB3/ZNF782/ADAL/ZNF709/ZNF781/CITED4/DBB1/RNF168/ZNF366/BHLHA15/DNMT3A/DRD4/EGFR/EGR3/ELK4/ESR1/ALAS1/SP8/FGF10/FHIT/XRN2/SBNO2/TRAK1/MSRB2/FOXO1/FOXO2/FOXO1/NUP210/NEDD4L/RYPB/VGLL2/MTOR/GABBR1/ZNF549/DNAJC2/AMPD2/DKK3/GLS2/AMPD3/BMP10/ZNF638/GNAS/ZNF311/ZNF844/GPER1/ZBTB44/GTF2B/BRF1/GUCY1A3/NME7/SOX8/NRG1/HLX/HMGA1/NR4A1/ACACB/HPCA/HOXB3/HOXC4/HOXC5/HOXC6/HOXC7/TFAP2E/ID3/BARHL2/NME9/IGF1/IGF2/CYR61/IL6/IL16/FOXK2/INHBA/IRF1/ISL1/JUP/USP50/HILS1/HES5/AFF3/LGALS9/LHCGR/LMO2/SMAD3/MC2R/ME1/MEF2D/MEOX1/MEOX2/MITF/LHX8/MOCS1/MOV10/DRG1/NFATC3/NFYB/NHLH2/NPPC/NTF3/OAS2/OPRL1/ATP5B/PALM/PARK2/LEF1/SIRT6/PITX2/PKH01/PKM/PLAGL1/PRKAG3/PML/RIPPLY3/RIPK4/TLR9/CYTL1/POMC/POU2AF1/BNC2/MED18/BANP/ELP3/PRMT6/DNAJC17/ZNF532/CNOT11/PRKD1/MYNN/MAPK3/MRAP/PRMT8/PAK6/ARNTL2/RGMA/PRDM11/TENM2/GATAD2B/CCAR2/CREBZF/RFC2/TRIM27/RGS12/RPA3/RPL8/RPL29/SCT/NPAS3/NOD2/SFRP2/GZF1/SGK1/BMP4/ZNF649/BMPR1B/BRD9/ZSCAN18/SOX9/STAT2/STK3/SUPT6H/TAFA4B/TBP/TCEA1/TCEB2/ZEB1/TEAD3/TERF1/TLE3/TNFAP3/TNFRSF1A/TRAFA1/TRAFA5/TWIST1/CCR2/TNFRSF4/UCP1/UPP1/WNT10B/YWHAG/ZNF7/ZNF124/ZNF177/PAX8/FZD5/CARD14/ZNF665/ZNF606/ZC3H12A/ZNF436/CALR/QTRT1/SLIRP/SCRT1/HIST1H3A/SLA2/ZNF397/NROB2/HOPX/KDM2B/LOXL3/CBX2/RAE1/GAS7/KMO/RUNX1/TP63/RUNX3/ACTN1/FADD/TNFRSF11A/SPHK1/BUD31/CCNA1/LIMD1/PIAS2/LDB2/CBFA2T2/AURKB/ADIPOQ/H2AFY/MICAL2/VGLL4/NUP93/ZBTB39/NR1H4   | 253 |
| GO:0043207 | response to external biotic stimulus                | 67/901  | 802/17046  | 0.00013 | 0.00448 | 0.00352 | SPON2/GJB6/HNRNPUL1/CHGA/CNP/ADM/CPS1/CYP11A1/COCH/NLRP6/DMBT1/UNC13D/FGA/FGF10/SBNO2/ACIN1/PUM2/SLC37A4/GSTP1/GUCY1A3/HLA-B/HLA-E/HMGA1/IL1RN/IL6/IL10RA/IL12RB2/IRF1/KCNJ8/STMN1/LCK/LGALS9/SMAD3/OAS2/PLA2G2A/PML/TLR9/TREM1/MAPK3/HTRA1/SLAMF8/PTGFR/CREBZF/ACTA2/DEFB134/CCL11/NOD2/BPI/STAT2/BST2/TLR5/TNFAP3/TNFRSF1A/CA7/CXCR4/FZD5/NLRX1/ZC3H12A/UNC93B1/HIST1H3A/IFITM1/FADD/TNFRSF11A/RSAD2/CD8A/LY86/NUP93                                                                                                                                                                                                                                                                                                                                                                                                                                                                                                                                                                                                                                                                                                                                                                                                                                                                                                                                                                                                                                                                                                                                           | 67  |
| GO:0051707 | response to other organism                          | 67/901  | 802/17046  | 0.00013 | 0.00448 | 0.00352 | SPON2/GJB6/HNRNPUL1/CHGA/CNP/ADM/CPS1/CYP11A1/COCH/NLRP6/DMBT1/UNC13D/FGA/FGF10/SBNO2/ACIN1/PUM2/SLC37A4/GSTP1/GUCY1A3/HLA-B/HLA-E/HMGA1/IL1RN/IL6/IL10RA/IL12RB2/IRF1/KCNJ8/STMN1/LCK/LGALS9/SMAD3/OAS2/PLA2G2A/PML/TLR9/TREM1/MAPK3/HTRA1/SLAMF8/PTGFR/CREBZF/ACTA2/DEFB134/CCL11/NOD2/BPI/STAT2/BST2/TLR5/TNFAP3/TNFRSF1A/CA7/CXCR4/FZD5/NLRX1/ZC3H12A/UNC93B1/HIST1H3A/IFITM1/FADD/TNFRSF11A/RSAD2/CD8A/LY86/NUP93                                                                                                                                                                                                                                                                                                                                                                                                                                                                                                                                                                                                                                                                                                                                                                                                                                                                                                                                                                                                                                                                                                                                           | 67  |
| GO:0019438 | aromatic compound biosynthetic process              | 253/901 | 3915/17046 | 0.00014 | 0.00469 | 0.00369 | CDH3/ZNF783/CDH13/CDKN1C/TCIRG1/C1D/ZBTB18/MTFHS/DMRT2/TBR1/NPFFR2/ADCY3/PNRC1/HNRNPUL1/ERLIN2/PSIP1/EGLN2/ACOT7/ZBED9/CIDEA/ZFP42/ADM/IL31RA/ZNF358/ZNF738/CTGF/SMYD1/CYLD/ADRB3/ZNF782/ADAL/ZNF709/ZNF781/CITED4/DBB1/RNF168/ZNF366/BHLHA15/DNMT3A/DRD4/EGFR/EGR3/ELK4/ESR1/ALAS1/SP8/FGF10/FHIT/XRN2/SBNO2/TRAK1/MSRB2/FOXO1/FOXO2/FOXO1/NUP210/NEDD4L/RYPB/VGLL2/MTOR/GABBR1/ZNF549/DNAJC2/AMPD2/DKK3/GLS2/AMPD3/BMP10/ZNF638/GNAS/ZNF311/ZNF844/GPER1/ZBTB44/GTF2B/BRF1/GUCY1A3/NME7/SOX8/NRG1/HLX/HMGA1/NR4A1/ACACB/HPCA/HOXB3/HOXC4/HOXC5/HOXC6/HOXC7/TFAP2E/ID3/BARHL2/NME9/IGF1/IGF2/CYR61/IL6/IL16/FOXK2/INHBA/IRF1/ISL1/JUP/USP50/HILS1/HES5/AFF3/LGALS9/LHCGR/LMO2/SMAD3/MC2R/ME1/MEF2D/MEOX1/MEOX2/MITF/LHX8/MOV10/DRG1/NFATC3/NFYB/NHLH2/NPPC/NTF3/OAS2/OPRL1/ATP5B/PALM/PARK2/LEF1/SIRT6/PITX2/PKH01/PKM/PLAGL1/PRKAG3/PML/RIPPLY3/RIPK4/TLR9/CYTL1/POMC/POU2AF1/BNC2/MED18/BANP/ELP3/PRMT6/DNAJC17/ZNF532/CNOT11/PRKD1/MYNN/MAPK3/MRAP/PRMT8/PAK6/ARNTL2/RGMA/PRDM11/TENM2/GATAD2B/CCAR2/CREBZF/RFC2/TRIM27/RGS12/RPA3/RPL8/RPL29/SCT/NPAS3/NOD2/SFRP2/GZF1/SGK1/BMP4/ZNF649/BMPR1B/BRD9/ZSCAN18/SOX9/STAT2/STK3/SUPT6H/TAFA4B/TBP/TCEA1/TCEB2/ZEB1/TEAD3/TERF1/TLE3/TNFAP3/TNFRSF1A/TRAFA1/TRAFA5/TWIST1/CCR2/TNFRSF4/UCP1/UPP1/WNT10B/YWHAG/ZNF7/ZNF124/ZNF177/PAX8/FZD5/CARD14/ZNF665/ZNF606/ZC3H12A/ZNF436/CALR/QTRT1/SLIRP/SCRT1/HIST1H3A/SLA2/ZNF397/NROB2/HOPX/KDM2B/LOXL3/CBX2/RAE1/GAS7/KMO/RUNX1/TP63/RUNX3/ACTN1/FADD/TNFRSF11A/SPHK1/BUD31/CCNA1/LIMD1/PIAS2/LDB2/CBFA2T2/AURKB/ADIPOQ/H2AFY/MICAL2/VGLL4/NUP93/RAPGEF2/ZBTB39/NR1H4 | 253 |
| GO:0006163 | purine nucleotide metabolic process                 | 45/901  | 480/17046  | 0.00014 | 0.00469 | 0.00369 | TCIRG1/NPFFR2/ADCY3/ACOT7/ADM/ADRB3/DLG2/DRD4/ENO2/FHIT/GABBR1/GAPDH5/AMPD2/PDE7B/AMPD3/GNAS/GPER1/DNAJC15/GUCY1A3/NME7/HK1/ACACB/HPCA/NME9/IGF1/LHCGR/MC2R/NUDT1/MYH4/NDUF84/ATP1A2/NPPC/OAS2/OPRL1/ATP5B/PALM/PDE4C/PDE7A/SIRT6/PDE6B/PGAM2/PKM/MRAP/SCT/CCR2                                                                                                                                                                                                                                                                                                                                                                                                                                                                                                                                                                                                                                                                                                                                                                                                                                                                                                                                                                                                                                                                                                                                                                                                                                                                                                  | 45  |
| GO:0030155 | regulation of cell adhesion                         | 52/901  | 581/17046  | 0.00014 | 0.00475 | 0.00373 | CDH13/MAP3K8/EGFLAM/CYLD/EGR3/UNC13D/EPHA1/EPHA3/FGA/FOXO2/FLOT2/MTOR/CYTH4/NRG1/HLA-DOA/HLA-DPA1/HLA-E/HLX/ZC3H12D/FMN1/IGF1/IGF2/CYR61/IL1RN/IL6/IRF1/KDR/LAMA3/LCK/ARHGDI2/LGALS9/SMAD3/MFI2/ATP5B/LEF1/PIK3CG/PML/IL20RB/APBB1P/PPP1CB/PAG1/NOD2/SFRP2/BMP4/SOX9/ZEB1/TGM2/CCR2/ZAP70/CALR/FADD/ADIPOQ                                                                                                                                                                                                                                                                                                                                                                                                                                                                                                                                                                                                                                                                                                                                                                                                                                                                                                                                                                                                                                                                                                                                                                                                                                                       | 52  |
| GO:0034654 | nucleobase-containing compound biosynthetic process | 249/901 | 3846/17046 | 0.00014 | 0.00476 | 0.00374 | ZNF783/CDH13/CDKN1C/TCIRG1/C1D/ZBTB18/DMRT2/TBR1/NPFFR2/ADCY3/PNRC1/HNRNPUL1/ERLIN2/PSIP1/EGLN2/ACOT7/ZBED9/CIDEA/ZFP42/ADM/IL31RA/ZNF358/ZNF738/CTGF/SMYD1/CYLD/ADRB3/ZNF782/ADAL/ZNF709/ZNF781/CITED4/DBB1/RNF168/ZNF366/BHLHA15/DNMT3A/DRD4/EGFR/EGR3/ELK4/ESR1/SP8/FGF10/FHIT/XRN2/SBNO2/TRAK1/MSRB2/FOXO1/FOXO2/FOXO1/NUP210/NEDD4L/RYPB/VGLL2/MTOR/GABBR1/ZNF549/DNAJC2/AMPD2/DKK3/GLS2/AMPD3/BMP10/ZNF638/GNAS/ZNF311/ZNF844/GPER1/ZBTB44/GTF2B/BRF1/GUCY1A3/NME7/SOX8/NRG1/HLX/HMGA1/NR4A1/ACACB/HPCA/HOXB3/HOXC4/HOXC5/HOXC6/HOXC7/TFAP2E/ID3/BARHL2/NME9/IGF1/IGF2/CYR61/IL6/IL16/FOXK2/INHBA/IRF1/ISL1/JUP/USP50/HILS1/HES5/AFF3/LGALS9/LHCGR/LMO2/SMAD3/MC2R/ME1/MEF2D/MEOX1/MEOX2/MITF/LHX8/MOV10/DRG1/NFATC3/NFYB/NHLH2/NPPC/NTF3/OAS2/OPRL1/ATP5B/PALM/PARK2/LEF1/SIRT6/PITX2/PKH01/PKM/PLAGL1/PRKAG3/PML/RIPPLY3/RIPK4/TLR9/CYTL1/POMC/POU2AF1/BNC2/MED18/BANP/ELP3/PRMT6/DNAJC17/ZNF532/CNOT11/PRKD1/MYNN/MAPK3/MRAP/PRMT8/PAK6/ARNTL2/RGMA/PRDM11/TENM2/GATAD2B/CCAR2/CREBZF/RFC2/TRIM27/RGS12/RPA3/RPL8/RPL29/SCT/NPAS3/NOD2/SFRP2/GZF1/SGK1/BMP4/ZNF649/BMPR1B/BRD9/ZSCAN18/SOX9/STAT2/STK3/SUPT6H/TAFA4B/TBP/TCEA1/TCEB2/ZEB1/TEAD3/TERF1/TLE3/TNFAP3/TNFRSF1A/TRAFA1/TRAFA5/TWIST1/CCR2/TNFRSF4/UCP1/UPP1/WNT10B/YWHAG/ZNF7/ZNF124/ZNF177/PAX8/FZD5/CARD14/ZNF665/ZNF606/ZC3H12A/ZNF436/CALR/QTRT1/SLIRP/SCRT1/HIST1H3A/SLA2/ZNF397/NROB2/HOPX/KDM2B/LOXL3/CBX2/RAE1/GAS7/KMO/RUNX1/TP63/RUNX3/ACTN1/FADD/TNFRSF11A/SPHK1/BUD31/CCNA1/LIMD1/PIAS2/LDB2/CBFA2T2/AURKB/ADIPOQ/H2AFY/MICAL2/VGLL4/NUP93/ZBTB39/NR1H4                          | 249 |
| GO:0009260 | ribonucleotide biosynthetic process                 | 28/901  | 251/17046  | 0.00016 | 0.00515 | 0.00405 | TCIRG1/NPFFR2/ADCY3/ACOT7/ADM/ADRB3/DRD4/GABBR1/AMPD2/AMPD3/GNAS/GPER1/GUCY1A3/NME7/ACACB/HPCA/NME9/LHCGR/MC2R/NPPC/OPRL1/ATP5B/PALM/PKM/MRAP/SCT/CCR2/UPP1                                                                                                                                                                                                                                                                                                                                                                                                                                                                                                                                                                                                                                                                                                                                                                                                                                                                                                                                                                                                                                                                                                                                                                                                                                                                                                                                                                                                      | 28  |

|            |                                               |         |            |         |         |         |                                                                                                                                                                                                                                                                                                                                                                                                                                                                                                                                                                                                                                                                                                                                                                                                                                                                                                                                                                                                                                                                                                                                                                                                                                                                                                                                                                                                                                                                                                                                                                                                                                                                                                                                                                                                                                                                                                                                                                                                                                                              |     |
|------------|-----------------------------------------------|---------|------------|---------|---------|---------|--------------------------------------------------------------------------------------------------------------------------------------------------------------------------------------------------------------------------------------------------------------------------------------------------------------------------------------------------------------------------------------------------------------------------------------------------------------------------------------------------------------------------------------------------------------------------------------------------------------------------------------------------------------------------------------------------------------------------------------------------------------------------------------------------------------------------------------------------------------------------------------------------------------------------------------------------------------------------------------------------------------------------------------------------------------------------------------------------------------------------------------------------------------------------------------------------------------------------------------------------------------------------------------------------------------------------------------------------------------------------------------------------------------------------------------------------------------------------------------------------------------------------------------------------------------------------------------------------------------------------------------------------------------------------------------------------------------------------------------------------------------------------------------------------------------------------------------------------------------------------------------------------------------------------------------------------------------------------------------------------------------------------------------------------------------|-----|
| GO:0071345 | cellular response to cytokine stimulus        | 56/901  | 642/17046  | 0.00016 | 0.00515 | 0.00405 | CHI3L1/CCR1/IL31RA/CYP11A1/EIF4G1/FGA/SBNO2/FLNB/NUP210/GPER1/GSTP1/HLA-B/HLA-DPA1/HLA-E/HLA-F/HSP90AB1/IL1R1/IL1RN/IL6/IL10RA/IL11RA/IL12RB2/IL15RA/IRF1/LGALS9/LTB/OAS2/IL21R/PARK2/LEF1/PML/IL20RB/MAPK3/PSMB4/PSMD7/CCL11/CCL17/CXCR5/SOX9/STAT2/BST2/TNFRSF1A/CCR2/TNFRSF4/CXCR4/CARD14/IL1F10/RAE1/IFITM1/FADD/TNFRSF11A/SPHK1/CCR2/RSAD2/ADIPOQ/NUP93                                                                                                                                                                                                                                                                                                                                                                                                                                                                                                                                                                                                                                                                                                                                                                                                                                                                                                                                                                                                                                                                                                                                                                                                                                                                                                                                                                                                                                                                                                                                                                                                                                                                                                 | 56  |
| GO:0001775 | cell activation                               | 71/901  | 868/17046  | 0.00016 | 0.00516 | 0.00406 | CHGA/MAP3K8/IL31RA/CTGF/CYLD/WBP2NL/DDOST/RNF168/EGR3/A2M/UNC13D/FGA/FGF10/SBNO2/FLOT2/MTOR/GNAS/GPER1/SCG3/HLA-DOA/HLA-DPA1/HLA-E/HLX/ZC3H12D/IGF1/IGF2/IL6/INHBA/IRF1/ITGB2/LCK/LCP1/LGALS9/SMAD3/NFATC3/IL21R/LEF1/PIK3CG/IL20RB/APBB1P/PAG1/MAPK3/TRPC7/SLURP1/PTPRE/NOD2/CXCR5/BMP4/BPI/SUPT6H/BST2/VAMP2/ZEB1/TNFAP3/TRPC6/CCR2/TNFRSF4/ZAP70/CXCR4/FZD5/LST1/ZC3H12A/CAST/SLA2/IRS2/ACTN1/FADD/SKAP2/RSAD2/CD8A/CD79A                                                                                                                                                                                                                                                                                                                                                                                                                                                                                                                                                                                                                                                                                                                                                                                                                                                                                                                                                                                                                                                                                                                                                                                                                                                                                                                                                                                                                                                                                                                                                                                                                                 | 71  |
| GO:0034097 | response to cytokine                          | 62/901  | 732/17046  | 0.00016 | 0.00522 | 0.00411 | CHI3L1/CCR1/IL31RA/CYP11A1/DDOST/EIF4G1/FGA/SBNO2/FLNB/NUP210/GPER1/GSTP1/HLA-B/HLA-DPA1/HLA-E/HLA-F/HSP90AB1/IL1R1/IL1RN/IL6/IL10RA/IL11RA/IL12RB2/IL15RA/IRF1/ITIH4/AFF3/LGALS9/LTB/OAS2/IL21R/PARK2/LEF1/PML/IL20RB/MAPK3/PSMB4/PSMD7/CCL11/CCL17/CXCR5/SOX9/STAT2/BST2/TIMP3/TNFRSF1A/CCR2/TNFRSF4/CXCR4/CARD14/IL1F10/TRIM63/RAE1/IFITM1/FADD/TNFRSF11A/ALDH1A2/SPHK1/CCR2/RSAD2/ADIPOQ/NUP93                                                                                                                                                                                                                                                                                                                                                                                                                                                                                                                                                                                                                                                                                                                                                                                                                                                                                                                                                                                                                                                                                                                                                                                                                                                                                                                                                                                                                                                                                                                                                                                                                                                           | 62  |
| GO:0060255 | regulation of macromolecule metabolic process | 327/901 | 5249/17046 | 0.00016 | 0.0053  | 0.00417 | ABI1/CDH3/ZNF783/CDH13/MBNL2/FARP1/CDKN1C/C1D/ZBTB18/DMRT2/CELF1/TBR1/NPFFR2/ADCY3/PNRC1/TMED10/HNRNPUL1/CHI3L1/ERLIN2/PSIP1/EGLN2/CARD16/ZBED9/CIDEA/CCR1/SLC51B/MAP3K8/ZFP42/IL31RA/ZNF358/LDLRAD3/CSTA/ZNF738/CTGF/SMYD1/SH3D19/CYLD/ADRB3/ESCO2/ZNF782/ZNF709/ZNF781/CITED4/RNF168/ZNF366/HLHA15/NLRP6/DLG2/DNMT3A/DRD4/ECE1/EEF2/EGFR/EGR3/PATL2/EIF4G1/A2M/ELK4/EPHA1/ESR1/SP8/FGA/FGF10/FHIT/XRN2/RASA3/PPM1E/SBNO2/TRAK1/MSRB2/ACIN1/FOXO1/FOXO2/FOXO3/SPG20/GGA3/DIP2A/FLOT2/NEDD4L/LARP1/PUM2/RYPB/MAPK8IP2/VGLL2/MTOR/RNF144B/ZNF549/FBXO2/GAPDH5/PABPC1/DNAJC2/FGF22/NPTN/DKK3/BMP10/ZNF638/GNAS/ZNF311/ZNF844/GPER1/DOK7/GRB10/ZBTB44/GSTP1/GTF2B/BRF1/GZMA/ANXA2/SERPIND1/SOX8/NRG1/HLX/HMGA1/NR4A1/APBA2/HOXB3/HOXC4/HOXC5/HOXC6/HOXD3/HSP90AB1/TFAP2E/ID3/COL28A1/BARHL2/IGF1/IGF2/CYR61/IL1RN/IL6/IL16/FOXK2/INHBA/IRF1/ISL1/ITGB2/ITIH3/ITIH4/IJUP/USP50/HILS1/KDR/HES5/AFF3/LCK/LGALS9/LMNA/LMO2/LTB/SMAD3/MEF2D/MAP3K1/MEOX1/MEOX2/MF12/MITF/LHX8/MOV10/NFATC3/NFYB/NHLH2/NOV/NPPC/NRAS/NTF3/OPRL1/PARK2/SPOCK3/LEF1/PRR16/ANGPT4/SIRT6/PGAM2/PI3/PIK3CG/PITX2/PKHD1/PLA2G2A/PLAGL1/PML/RIPPLY3/RIPK4/TLR9/CYTL1/POMC/SSH1/POU2AF1/BNC2/MED18/BANP/PPP1CB/PPP1CC/PIWIL2/ELP3/PRMT6/DNAJC17/ZNF532/PPP2R2B/FANCI/CNOT11/PRKAR1B/PRKDI1/MYNN/MAPK3/MAP2K2/PRMT8/MASP1/HTRA1/PSMB4/PAK6/ARNTL2/RGMA/PRDM11/PSMD7/PTGFR/TENM2/GATAD2B/METTL14/CCAR2/PXN/CREBZF/ACTA2/RASGRF2/TRIM27/CCL11/CCL17/NPA53/NOD2/SFRP2/TRA2B/GZF1/SGK1/BMP4/ZNF649/BMPR1B/BRD9/ZSCAN18/BOK/SOX9/STAT2/STK3/STK10/SUPT6H/BST2/TAF4B/TBP/TCEA1/TCEB2/ZEB1/ACTC1/TEAD3/TERF1/TIMP3/LE3/TNFAP3/TNFRSF1A/TNXXB/TRAF1/TRAF5/PHLDA2/TWIST1/CCR2/TNFRSF4/UCP1/VARS/WNT10B/YWHAG/ZNF7/ZNF124/ZNF177/PAX8/CXCR4/FZD5/RAB7A/CARD14/ZNF665/ZC3H14/ZNF606/ZC3H12A/CPEB4/ZNF436/CALR/SLIRP/CAST/SCRT1/HIST1H3A/SLA2/ZNF397/NROB2/HOPX/SPINK7/TRIM63/KDM2B/LOXL3/CBX2/GAS7/CDK10/RUNX1/TP63/RUNX3/SERPINA6/IRS2/ACTN1/CRADD/FADD/TNFRSF11A/ALDH1A2/SPHK1/BUD31/CCNA1/LIMD1/ER1/PIAS2/ZFAND2A/MAP3K6/LDB2/CBFA2T2/AURKB/ADIPOQ/H2AFY/MICAL2/N4BP1/VGLL4/RAPGEF2/ZBTB39/FGF19/NR1H4 | 327 |
| GO:0061138 | morphogenesis of a branching epithelium       | 23/901  | 189/17046  | 0.00017 | 0.0053  | 0.00417 | ADM/ESR1/FGF10/FOXO2/SOX8/RSPO2/IGF1/IL6/KDR/NFATC3/LEF1/PITX2/PML/PXN/CCL11/SFRP2/GZF1/BMP4/SOX9/TGM2/PAX8/FZD5/TP63                                                                                                                                                                                                                                                                                                                                                                                                                                                                                                                                                                                                                                                                                                                                                                                                                                                                                                                                                                                                                                                                                                                                                                                                                                                                                                                                                                                                                                                                                                                                                                                                                                                                                                                                                                                                                                                                                                                                        | 23  |
| GO:0031348 | negative regulation of defense response       | 18/901  | 130/17046  | 0.00017 | 0.0053  | 0.00417 | NLRP6/A2M/GPER1/GSTP1/HLA-B/HLA-E/ISL1/LGALS9/SMAD3/NOV/IL20RB/HTRA1/PSMB4/NOD2/TNFAP3/TNFRSF1A/NLRX1/ADIPOQ                                                                                                                                                                                                                                                                                                                                                                                                                                                                                                                                                                                                                                                                                                                                                                                                                                                                                                                                                                                                                                                                                                                                                                                                                                                                                                                                                                                                                                                                                                                                                                                                                                                                                                                                                                                                                                                                                                                                                 | 18  |
| GO:0035295 | tube development                              | 52/901  | 585/17046  | 0.00017 | 0.00536 | 0.00422 | PDPN/CHI3L1/ADM/CPS1/ZNF358/CTGF/EGFR/ESR1/FGF10/FOXO1/FOXO2/AKR1B1/SOX8/HLX/HSD11B1/RSPO2/FMN1/IGF1/AQP2/KDR/ACAT1/INSC/HES5/LOX/SMAD3/NFATC3/LEF1/C11orf73/PITX2/PML/IFT122/MAPK3/MAP2K2/PXN/SCT/CCL11/STRA6/SFRP2/GZF1/BMP4/SLC8A1/SOX9/STK3/ZEB1/TGM2/TWIST1/PAX8/HOPX/KDM2B/TP63/ALDH1A2/MICAL2                                                                                                                                                                                                                                                                                                                                                                                                                                                                                                                                                                                                                                                                                                                                                                                                                                                                                                                                                                                                                                                                                                                                                                                                                                                                                                                                                                                                                                                                                                                                                                                                                                                                                                                                                         | 52  |
| GO:0009152 | purine ribonucleotide biosynthetic process    | 27/901  | 240/17046  | 0.00018 | 0.00559 | 0.0044  | TCIRG1/NPFFR2/ADCY3/ACOT7/ADM/ADRB3/DRD4/GABBR1/AMPD2/AMPD3/GNAS/GPER1/GUCY1A3/NME7/ACACB/HPCA/NME9/LHCGR/MC2R/NPPC/OPRL1/ATP5B/PALM/PKM/MRAP/SCT/CCR2                                                                                                                                                                                                                                                                                                                                                                                                                                                                                                                                                                                                                                                                                                                                                                                                                                                                                                                                                                                                                                                                                                                                                                                                                                                                                                                                                                                                                                                                                                                                                                                                                                                                                                                                                                                                                                                                                                       | 27  |
| GO:0046390 | ribose phosphate biosynthetic process         | 28/901  | 253/17046  | 0.00018 | 0.0056  | 0.0044  | TCIRG1/NPFFR2/ADCY3/ACOT7/ADM/ADRB3/DRD4/GABBR1/AMPD2/AMPD3/GNAS/GPER1/GUCY1A3/NME7/ACACB/HPCA/NME9/LHCGR/MC2R/NPPC/OPRL1/ATP5B/PALM/PKM/MRAP/SCT/CCR2/UPP1                                                                                                                                                                                                                                                                                                                                                                                                                                                                                                                                                                                                                                                                                                                                                                                                                                                                                                                                                                                                                                                                                                                                                                                                                                                                                                                                                                                                                                                                                                                                                                                                                                                                                                                                                                                                                                                                                                  | 28  |
| GO:0040007 | growth                                        | 72/901  | 887/17046  | 0.00018 | 0.0056  | 0.0044  | CDH13/CDKN1C/CELF1/ESM1/EGLN2/CHRNA1/COMP/ADM/CTGF/ADRB3/DIO3/DMBT1/ESR1/FGF10/XRN2/FOXO2/SPG20/EPB41L3/NEDD4L/MTOR/TENM4/GATM/BMP10/GNAS/FLVCR1/NRG1/HLX/ACACB/APBA2/ZC3H12D/RSPO2/FMN1/BARHL2/IGF1/CYR61/IL6/INHBA/SMAD3/MT1A/MYL2/NUBP1/NEDD9/NOV/NPPC/PARK2/LEF1/SIRT6/ATP8A2/PKM/PLML/BNC2/PRMT6/BIN3/HTRA1/CCAR2/CCL11/NOD2/STRA6/SFRP2/SGK1/BMP4/BMPR1B/SLIT1/SOX9/STK3/BST2/TIMP3/WNT10B/HOPX/SPHK1/ULK2                                                                                                                                                                                                                                                                                                                                                                                                                                                                                                                                                                                                                                                                                                                                                                                                                                                                                                                                                                                                                                                                                                                                                                                                                                                                                                                                                                                                                                                                                                                                                                                                                                             | 72  |
| GO:0048534 | hematopoietic or lymphoid organ development   | 61/901  | 720/17046  | 0.00018 | 0.00561 | 0.00441 | ABI1/CDKN1C/CCR1/IL31RA/CYLD/ESCO2/EEF2/EFNA2/EGR3/EML1/FGF10/SBNO2/ACIN1/FOXO1/MTOR/GNAS/FLVCR1/ANXA2/HLA-B/HLA-DOA/HLX/HOXB3/IL6/INHBA/IRF1/KDR/HES5/LCK/LGALS9/LMO2/LTB/MEOX1/MITF/NFATC3/LEF1/PITX2/PML/HERC6/SMPD3/BGLAP/SFRP2/CXCR5/VPS33A/BMP4/STK3/TCEA1/ZEB1/WNT10B/ZAP70/FZD5/C6orf25/SCIN/RUNX1/RUNX3/ACTN1/FADD/TNFRSF11A/RSAD2/CD8A/ADIPOQ/CD79A                                                                                                                                                                                                                                                                                                                                                                                                                                                                                                                                                                                                                                                                                                                                                                                                                                                                                                                                                                                                                                                                                                                                                                                                                                                                                                                                                                                                                                                                                                                                                                                                                                                                                                | 61  |

|            |                                                                |         |            |         |         |         |                                                                                                                                                      |     |
|------------|----------------------------------------------------------------|---------|------------|---------|---------|---------|------------------------------------------------------------------------------------------------------------------------------------------------------|-----|
| GO:0070372 | regulation of ERK1 and ERK2 cascade                            | 25/901  | 215/17046  | 0.00018 | 0.00561 | 0.00441 | CHI3L1/CCR1/CTGF/NLRP6/EGFR/FGA/FGF10/GPER1/GSTP1/IGF1/CYR61/IL6/KDR/LGALS9/PKHD1/PLA2G2A/MAPK3/CCL11/CCL17/NOD2/BMP4/TNFRSF11A/ADIPOQ/RAPGEF2/FGF19 | 25  |
| GO:0051094 | positive regulation of developmental process                   | 83/901  | 1059/17046 | 0.00019 | 0.00567 | 0.00446 | DMRT2/CELF1/CHI3L1/CCR1/SEZ6/ADM/CTGF/SMYD1/DIO3/DMBT1/EGR3/EIF4G1/UNC13D/EPHA1/EPHA3/FGA/FGF10/ACIN1/FOXC2/NEDD4L/MTOR/TENM4/NPTN/BMP10/GN          | 83  |
| GO:0007015 | actin filament organization                                    | 31/901  | 293/17046  | 0.00019 | 0.00567 | 0.00446 | ABI1/FAM101A/CTGF/EPHA1/PHACTR1/PPM1E/MSRB2/MTOR/TMOD4/FMN1/LCP1/SMAD3/MAP3K1/NEDD9/PARK2/SSH1/TTC17/BIN3/ACTR3B/ERMN/TRIM27/CCL11/MICAL1/           | 31  |
| GO:0001763 | morphogenesis of a branching structure                         | 24/901  | 203/17046  | 0.00019 | 0.00567 | 0.00446 | ADM/ESR1/FGF10/FOXC2/SOX8/RSP02/IGF1/IL6/KDR/NFATC3/LEF1/PITX2/PML/ERMN/PXN/CCL11/SFRP2/GZF1/BMP4/SOX9/TGM2/PAX8/FZD5/TP63                           | 24  |
| GO:0006140 | regulation of nucleotide metabolic process                     | 24/901  | 203/17046  | 0.00019 | 0.00567 | 0.00446 | NPFFR2/ADM/ADRB3/DRD4/GABBR1/GAPDH/GNAS/GPER1/DNAJC15/GUCY1A3/HPCA/IGF1/LHCGR/MC2R/ME1/ME2/NPPC/OPRL1/PALM/SIRT6/PGAM2/MRAP/SCT/CCR2                 | 24  |
| GO:0007267 | cell-cell signaling                                            | 89/901  | 1154/17046 | 0.00019 | 0.00567 | 0.00446 | KCNMB2/NPFFR2/ADCY3/CHRNA1/CHRNA2/CHRNA5/PANX3/CCR1/SEZ6/CNP/ADM/CTGF/ADRB3/BHLHA15/DLG2/ABAT/DRD4/DTNA/EFNA2/EGR3/FGA/FGF10/FOXO1/MAPK8IP2          | 89  |
| GO:0009187 | cyclic nucleotide metabolic process                            | 23/901  | 191/17046  | 0.00019 | 0.00576 | 0.00453 | NPFFR2/ADCY3/CNP/ADM/ADRB3/DRD4/GABBR1/AMPD2/PDE7B/GNAS/GPER1/GUCY1A3/HPCA/LHCGR/MC2R/NPPC/OPRL1/PALM/PDE4C/PDE7A/MRAP/SCT/CCR2                      | 23  |
| GO:0019219 | regulation of nucleobase-containing compound metabolic process | 235/901 | 3617/17046 | 0.00019 | 0.00576 | 0.00453 | ZNF783/CDH13/MBNL2/CDKN1C/C1D/ZBTB18/DMRT2/CELF1/TBR1/NPFFR2/PNRC1/HNRNPUL1/ERLIN2/PSIP1/EGLN2/ZBED9/CIDEA/ZFP42/ADM/IL31RA/ZNF358/ZNF738/SMYD1      | 235 |
| GO:0006952 | defense response                                               | 119/901 | 1639/17046 | 0.00019 | 0.00576 | 0.00453 | ABI1/TANK/KLRG1/TCIRG1/SPON2/ADCY3/CHGA/CHI3L1/CCR1/MAP3K8/ADM/IL31RA/PARP4/CYLD/DDOST/COCH/NLRP6/DMBT1/DRD4/EGFR/EIF4G1/A2M/UNC13D/FCGR2A/FG        | 119 |
| GO:0070873 | regulation of glycogen metabolic process                       | 8/901   | 32/17046   | 0.0002  | 0.00589 | 0.00463 | MTOR/GRB10/IGF1/IGF2/POMC/PPP1CB/PHLDA2/IRS2                                                                                                         | 8   |
| GO:0014032 | neural crest cell development                                  | 10/901  | 49/17046   | 0.0002  | 0.00594 | 0.00467 | FOXC2/SOX8/NRG1/ISL1/LEF1/PITX2/SOX9/TWIST1/ALDH1A2/FGF19                                                                                            | 10  |

|            |                                                    |         |            |         |         |         |                                                                                                                                                                                                                                                                                                                                                                                                                                                                                                                                                                                                                                                                                                                                                                                                                                                                                                                                                                                                                                                                                                                                           |     |
|------------|----------------------------------------------------|---------|------------|---------|---------|---------|-------------------------------------------------------------------------------------------------------------------------------------------------------------------------------------------------------------------------------------------------------------------------------------------------------------------------------------------------------------------------------------------------------------------------------------------------------------------------------------------------------------------------------------------------------------------------------------------------------------------------------------------------------------------------------------------------------------------------------------------------------------------------------------------------------------------------------------------------------------------------------------------------------------------------------------------------------------------------------------------------------------------------------------------------------------------------------------------------------------------------------------------|-----|
| GO:0051704 | multi-organism process                             | 151/901 | 2174/17046 | 0.00021 | 0.00609 | 0.00479 | ABI1/TCIRG1/SPON2/CEL1/GJB6/ADCY3/ADAM29/HNRNPUL1/CHGA/PSIP1/CNP/ZFP42/ADM/CPS1/CYP11A1/DBB1/WBP2NL/COCH/NLRP6/DMBT1/DNMT3A/ABAT/DRD4/EIF4G1/UNC13D/ESR1/FGA/FGF10/XRN2/SBNO2/ACIN1/AKR1B1/NUP210/NEDD4L/PUM2/MAPK8IP2/TSSK2/MTOR/SLC37A4/GAPDH5/GJB2/VP54A/GNAS/IZUMO1/GSTP1/GTF2B/GUCY1A3/SOX8/HLA-B/HLA-E/HMGA1/HSPA1L/HSP90AB1/IGF1/IL1R1/IL1RN/IL6/IL10RA/IL12RB2/IL16/INHBA/IRF1/ITGB7/HILS1/KCNJ8/KDR/IPO5/KRT7/STMN1/LCK/LDLR/LGALS9/LHCGR/LMNA/SMAD3/NPC/OAS2/PARK2/LEF1/PGAM2/PI3/PLA2G2A/SPA17/PML/TLR9/TREM1/MOV10L1/PIWIL2/PRMT6/WDR33/VAC14/LMBRD1/MAPK3/HTRA1/SLAMF8/PSMB4/PSMD7/PTGFR/CREBZF/ACTA2/TRIM27/RPL8/DEFB134/RPL29/CCL11/NPAS3/NOD2/BMP4/SLC20A2/BMPR1B/SOX9/BPI/STAT2/SUPT6H/BST2/TAF4B/TBP/TCEA1/TCEB2/TEAD3/TLR5/TNFAIP3/TNFRSF1A/CCR2/CA7/CXCR4/FZD5/RAB7A/CCDC86/NLRX1/ZC3H12A/CALR/UNC93B1/SLRP/CAST/HIST1H3A/SPATA16/KDM2B/RAE1/IFITM1/TP63/FADD/TNFRSF11A/CCNA1/ENDOU/RAD2/CD8A/LY86/MTL5/NUP93/USP6NL                                                                                                                                                                                                  | 151 |
| GO:0034329 | cell junction assembly                             | 25/901  | 217/17046  | 0.00021 | 0.00611 | 0.0048  | CDH3/CDH9/CDH12/CDH13/PKP3/MPP7/EPHA3/NFASC/EPB41L3/GJB2/FMN1/JUP/KDR/LAMA3/SMAD3/PLEC/FBLIM1/LIMS2/PARVA/PXN/FZD5/PARD6G/PARD6B/ACTN1/RAPGEF2                                                                                                                                                                                                                                                                                                                                                                                                                                                                                                                                                                                                                                                                                                                                                                                                                                                                                                                                                                                            | 25  |
| GO:0051272 | positive regulation of cellular component movement | 35/901  | 349/17046  | 0.00021 | 0.00619 | 0.00486 | CDH13/PDPN/CCR1/EGFR/EPHA1/FGF10/FOXC2/GPER1/IGF1/CYR61/IL6/KDR/STMN1/LGALS9/SMAD3/NTF3/P2RY6/LEF1/ANGPT4/ELP3/PRKD1/MAP2K2/CCL11/BMP4/SLC8A1/SOX9/TWIST1/CCR2/PTP4A1/COL18A1/CALR/IRS2/FADD/SPHK1/RAPGEF2                                                                                                                                                                                                                                                                                                                                                                                                                                                                                                                                                                                                                                                                                                                                                                                                                                                                                                                                | 35  |
| GO:0044264 | cellular polysaccharide metabolic process          | 14/901  | 89/17046   | 0.00023 | 0.00649 | 0.00511 | CPS1/MTOR/GRB10/HAS1/IGF1/IGF2/PRKAG3/POMC/PPP1CB/PPP1CC/CSGALNACT1/PHLDA2/IRS2/STBD1                                                                                                                                                                                                                                                                                                                                                                                                                                                                                                                                                                                                                                                                                                                                                                                                                                                                                                                                                                                                                                                     | 14  |
| GO:0050776 | regulation of immune response                      | 72/901  | 894/17046  | 0.00023 | 0.00649 | 0.00511 | ABI1/TANK/KLRG1/SPON2/HCS2/MAP3K8/CYLD/COCH/NLRP6/DMBT1/EGFR/A2M/UNC13D/FCGR2A/FGF10/RASA3/FOXO1/PUM2/MTOR/FGF22/FFAR2/NRG1/HLA-B/HLA-DPA1/HLA-E/HLA-F/HLX/NR4A1/HSP90AA1/HSP90AB1/IL6/IRF1/ITGB2/ITGB7/LCK/LGALS9/SMAD3/MAP3K1/MOV10/NFATC3/NRAS/IL20RB/TLR9/PAG1/MAPK3/MAP2K2/MASP1/PSMB4/PSMD7/RASGRF2/TRIM27/NOD2/STAT2/SUPT6H/BST2/TLR5/TNFAIP3/CCR2/ZAP70/FZD5/NLRX1/UNC93B1/SLA2/IFITM1/IRS2/FADD/SKAP2/RSAD2/CD8A/RAPGEF2/CD79A/FGF19                                                                                                                                                                                                                                                                                                                                                                                                                                                                                                                                                                                                                                                                                             | 72  |
| GO:0055082 | cellular chemical homeostasis                      | 53/901  | 607/17046  | 0.00023 | 0.00652 | 0.00513 | TCIRG1/TRDN/GJB6/CLN5/CCR1/ADM/DRD4/ESR1/FOXO1/NEDD4L/NPTN/GPER1/FLVCR1/ANXA6/HK1/IL1R1/AQP2/AQP5/AQP9/LCK/NUBP1/ATP1A2/OPRL1/ATP5B/PDE6B/PIK3CG/PKHD1/PML/SLC30A10/CHRNA9/SYBU/PRKD1/SLAMF8/TRPC7/CCL11/SGK1/BMP4/SLC4A1/SLC8A1/TGM2/TRPC4/TRPC6/CCR2/CA7/CACNA1E/CXCR4/RAB7A/CALR/ATP13AA4/CASQ1/IRS2/SMGT1/MTL5                                                                                                                                                                                                                                                                                                                                                                                                                                                                                                                                                                                                                                                                                                                                                                                                                        | 53  |
| GO:0007167 | enzyme linked receptor protein signaling pathway   | 89/901  | 1161/17046 | 0.00023 | 0.00656 | 0.00516 | ABI1/CDH3/CDH13/CDKN1C/TCIRG1/ADCY3/LECT1/ESM1/CIDEA/AP3S1/IL31RA/CTGF/PPM1L/EFNA2/EGFR/EIF4G1/EPHA1/EPHA3/EPHB4/FGF10/RASA3/FOXC2/FOXO1/SPG20/NEDD4L/ARHGFE18/MTOR/FGF22/NPTN/BMP10/GPER1/GRB10/NRG1/NR4A1/HSP90AA1/IGF1/IGF2/CYR61/INHBA/JUP/KDR/HES5/LCK/ARHGDI1A/LTBP1/SMAD3/MAP3K1/MOV10/NOV/NPPC/NRAS/NTF3/ARHGFE3/LEF1/ANGPT4/PRKAG3/PML/TLR9/PPP1CB/PPP1CC/PRKAR1B/LMBRD1/PAG1/PRKD1/MAPK3/MAP2K2/HTRA1/PSMB4/RGMA/PSMD7/PLEKHG5/PTPRE/PXN/RASGRF2/RIT2/SFRP2/BMP4/BMPR1B/SOX9/ZEB1/ZAP70/RAB7A/TMEM204/IRS2/SPHK1/CD8A/ADIPOQ/RAPGEF2/FGF19                                                                                                                                                                                                                                                                                                                                                                                                                                                                                                                                                                                      | 89  |
| GO:0048736 | appendage development                              | 21/901  | 169/17046  | 0.00023 | 0.00656 | 0.00516 | COMP/ZNF358/ECE1/SP8/FGF10/GNAS/FLVCR1/RSPO2/FMN1/AFF3/MEOX2/LEF1/PITX2/IFT122/SFRP2/BMP4/BMPR1B/SOX9/TWIST1/TP63/ALDH1A2                                                                                                                                                                                                                                                                                                                                                                                                                                                                                                                                                                                                                                                                                                                                                                                                                                                                                                                                                                                                                 | 21  |
| GO:0060173 | limb development                                   | 21/901  | 169/17046  | 0.00023 | 0.00656 | 0.00516 | COMP/ZNF358/ECE1/SP8/FGF10/GNAS/FLVCR1/RSPO2/FMN1/AFF3/MEOX2/LEF1/PITX2/IFT122/SFRP2/BMP4/BMPR1B/SOX9/TWIST1/TP63/ALDH1A2                                                                                                                                                                                                                                                                                                                                                                                                                                                                                                                                                                                                                                                                                                                                                                                                                                                                                                                                                                                                                 | 21  |
| GO:1901699 | cellular response to nitrogen compound             | 57/901  | 667/17046  | 0.00023 | 0.00656 | 0.00516 | TCIRG1/ADCY3/AP3S1/CPS1/CYP11A1/DNMT3A/EGFR/EGR3/EIF4G1/FGF10/RASA3/FOXC2/FOXO1/AKR1B1/MTOR/FGF22/GNAS/GPER1/GRB10/NRG1/NR4A1/HRH1/IGF2/IL1RN/AQP9/JUP/IPO5/LCK/SMAD3/NRAS/PARK2/PIK3CG/PRKAG3/TLR9/SSH1/PRKAR1B/LMBRD1/MAPK3/MAP2K2/PSMB4/PSMD7/PTPRE/PXN/RASGRF2/NOD2/SLC8A1/SOX9/VAMP2/ZEB1/WNT10B/CEPE4/MGARP/IRS2/ADIPOQ/RAPGEF2/FGF19/NR1H4                                                                                                                                                                                                                                                                                                                                                                                                                                                                                                                                                                                                                                                                                                                                                                                         | 57  |
| GO:0006828 | manganese ion transport                            | 5/901   | 12/17046   | 0.00024 | 0.00658 | 0.00517 | SLC30A10/TRPC7/TRPC4/TRPC6/TRPM2                                                                                                                                                                                                                                                                                                                                                                                                                                                                                                                                                                                                                                                                                                                                                                                                                                                                                                                                                                                                                                                                                                          | 5   |
| GO:0048145 | regulation of fibroblast proliferation             | 13/901  | 79/17046   | 0.00024 | 0.00658 | 0.00517 | B4GALT7/EGFR/ESR1/FGF10/MORC3/GSTP1/ANXA2/IGF1/NRAS/SIRT6/PML/S100A6/SPHK1                                                                                                                                                                                                                                                                                                                                                                                                                                                                                                                                                                                                                                                                                                                                                                                                                                                                                                                                                                                                                                                                | 13  |
| GO:0065009 | regulation of molecular function                   | 175/901 | 2588/17046 | 0.00024 | 0.00661 | 0.00519 | ABI1/CDH3/FARP1/RCAN2/CDKN1C/TRDN/PITRM1/NPFFR2/ADCY3/CHI3L1/CARD16/MAP3K8/CSTA/CTGF/CYLD/ADRB3/DLG2/DRD4/EGFR/A2M/EPHA1/EPHA3/ESR1/SPATA13/PHACTR1/FGF10/RASA3/PPM1E/TBC1D9B/TBC1D1/NEDD4L/PSD3/ARHGFE18/MAPK8IP2/MTOR/GABBR1/RASGEF1C/ALS2CL/RGS22/FGF22/CYTH4/GNAS/GPER1/DOK7/DNAJC15/GSTP1/GZMA/ANXA2/SERPIND1/KCNIP2/NRG1/HPCA/AGFG2/HSP90AA1/HSP90AB1/ID3/COL28A1/IGF1/IGF2/CYR61/IL1RN/IL6/ISL1/ITIH3/ITIH4/JUP/IPO5/LCK/ARHGDI1A/LGALS9/LHCGR/LLGL1/SMAD3/MAP3K1/MFNG/PLEKHG7/ATP1A2/NHLH2/NRAS/NTF3/OPRL1/PALM/ARHGFE3/PARK2/SPOCK3/LEF1/ANGPT4/PI3/PIK3CG/PITX2/PKHD1/PML/FXYD6/PNLIP/RIPK4/TLR9/CYTL1/PON1/RIN2/ELP3/ARHGFE10L/PPP2R2B/VAC14/PRKAR1B/PRKD1/MAPK3/MAP2K2/PRMT8/SLAMF8/CDC42SE1/PSMB4/PAK6/PSMD7/PLEKHG5/CCAR2/PXNIP/CREBZF/RASGRF2/TRIM27/RGS12/CCL11/CCL17/NOD2/SFRP2/ARHGAP9/SGK1/BMP4/BOK/STK3/STK10/BST2/VAMP2/TCEA1/TERF1/TIMP3/TNFAIP3/TNXB/TRA1/TRA5/TRPC6/TWIST1/CCR2/TNFRSF4/WNT10B/YWHAG/CACNB2/CXCR4/FZD5/CARD14/ZC3H12A/CAST/SH3BGR1/NR0B2/HOPX/SPINK7/TP63/SERPINA6/IRS2/CRADD/FADD/TNFRSF11A/SPHK1/STARD13/PIAS2/MAP3K6/AURKB/ADIPOQ/ARHGAP29/H2AFY/ARHGFE10/RAPGEF2/USP6NL/RABGAP1L/IQSEC1/FGF19 | 175 |

|            |                                                |         |            |         |         |         |                                                                                                                                                                                                                                                                                                                                                                                                                                                                                                                                                                                                                                                                                                                                                                                                                                                                                                                                                                                                                                                                                                                                                                                                                                                                                                                                                                                                                                                                                                                                                                                                                                                                                                                                                                                                                                                                                                                                                                                                                                                                                                                                                                                                                          |     |
|------------|------------------------------------------------|---------|------------|---------|---------|---------|--------------------------------------------------------------------------------------------------------------------------------------------------------------------------------------------------------------------------------------------------------------------------------------------------------------------------------------------------------------------------------------------------------------------------------------------------------------------------------------------------------------------------------------------------------------------------------------------------------------------------------------------------------------------------------------------------------------------------------------------------------------------------------------------------------------------------------------------------------------------------------------------------------------------------------------------------------------------------------------------------------------------------------------------------------------------------------------------------------------------------------------------------------------------------------------------------------------------------------------------------------------------------------------------------------------------------------------------------------------------------------------------------------------------------------------------------------------------------------------------------------------------------------------------------------------------------------------------------------------------------------------------------------------------------------------------------------------------------------------------------------------------------------------------------------------------------------------------------------------------------------------------------------------------------------------------------------------------------------------------------------------------------------------------------------------------------------------------------------------------------------------------------------------------------------------------------------------------------|-----|
| GO:0000904 | cell morphogenesis involved in differentiation | 76/901  | 958/17046  | 0.00024 | 0.00661 | 0.00519 | FARP1/SPON2/TBR1/LECT1/FRMD6/CNP/COL9A3/EFNA2/EGFR/UNC13D/EPHA1/EPHA3/EPHB4/FGA/FGF10/RASA3/BTBD3/SPG20/NFASC/FLNB/NEDD4L/MAPK8IP2/FGF22/NRG1/HSP90AA1/HSP90AB1/FMN1/BARHL2/ISL1/ITGB7/STMN1/ARHGDI1/LLGL1/SMAD3/MAP3K1/MF12/NRAS/NTF3/LEF1/ATP8A2/SSH1/PARVA/MAPK3/MAP2K2/PSMB4/SGMA/TRP C7/PSMD7/TENM2/PXN/RASGRF2/S100A4/S100A6/SFRP2/VPS33A/BMP4/BMPR1B/SLIT1/SOX9/TRPC4/TRPC6/TWIST1/CACNB2/PAX8/C6orf25/COL18A1/CALR/ANTXR1/PARD6B/LOXL3/RUNX3/IRS2/ACTN1/RAPGEF2/ULK2/FGF19                                                                                                                                                                                                                                                                                                                                                                                                                                                                                                                                                                                                                                                                                                                                                                                                                                                                                                                                                                                                                                                                                                                                                                                                                                                                                                                                                                                                                                                                                                                                                                                                                                                                                                                                       | 76  |
| GO:0009790 | embryo development                             | 76/901  | 958/17046  | 0.00024 | 0.00661 | 0.00519 | ABI1/CDKN1C/SPEG/ZBTB18/DMRT2/CELFI1/GJB6/COL11A1/ZFP42/ADM/ZNF358/DMBT1/DNMT3A/ECE1/EGFR/SP8/FGF10/FOXC2/TENM4/GATM/GNAS/FLVCR1/SOX8/NRG1/HLX/APBA2/HOXB3/HOXC4/HOXC5/HOXC6/HOXD3/HSD17B2/ID3/RSPO2/IGF1/CYR61/IL1RN/INHBA/ISL1/ITGA7/ITGB2/KDR/HES5/RESP18/AFF3/LAMA3/LMO2/SMAD3/MEOX1/MEOX2/MGAT1/LEF1/ATP8A2/PITX2/RIPPLY3/CHRNA9/IFT122/SCT/STRA6/SFRP2/BMP4/SLC8A1/SOX9/STK3/ZEB1/PHLDA2/TWIST1/PAX8/FZD5/HOPX/KDM2B/RUNX1/TP63/ALDH1A2/ADIPOQ/MICAL2                                                                                                                                                                                                                                                                                                                                                                                                                                                                                                                                                                                                                                                                                                                                                                                                                                                                                                                                                                                                                                                                                                                                                                                                                                                                                                                                                                                                                                                                                                                                                                                                                                                                                                                                                              | 76  |
| GO:0071840 | cellular component organization or biogenesis  | 351/901 | 5713/17046 | 0.00025 | 0.00674 | 0.0053  | AKT3/ABI1/CDH3/CDH9/TSPAN5/CDH12/CDH13/FARP1/TCIRG1/TRDN/SPON2/C1D/TACC2/PDPN/CELFI1/TBR1/SEPT9/ADCY3/TMED10/LECT1/RER1/ESM1/CHGA/PSIP1/PKP3/EGLN2/ATXN2L/B4GALT7/EXOC3/CHRNA1/CHRNA2/GPRIN1/CIDEA/C1QTNF7/PANX3/CLN5/MRPL52/FRMD6/SLC51B/SEZ6/CNP/APOA1BP/COL9A3/COL11A1/COMP/SCLT1/ZFP42/ADM/EGFLAM/NDUFAF6/MPP7/FAM101A/CTGF/SMYD1/SGOL1/SH3D19/CYLD/FITM1/DOB1/WBP2NL/DDOST/RNF168/BHLHA15/COCH/DLG2/DNMT3A/DSG3/EFNA2/EGFR/PATL2/A2M/ELK4/TMEM17/EML1/UNC13D/EPHA1/EPHA3/EPHB4/ESR1/ALAS1/SPATA13/PHACTR1/BGA/FGF10/RASA3/PPM1E/BTBD3/MSRB2/ACIN1/LIMCH1/FOXC2/SPG20/NFASC/EPB41L3/FLNB/FLOT2/MLC1/TBC1D1/NUP210/ATP11A/NEDD4L/SYNE1/PUM2/ARHGEF18/RYBP/MAPK8IP2/MTOR/SLC37A4/SAMM50/DFNB31/ALS2CL/TENM4/GAS2/SACS/PLEK2/DNAJC2/FGF22/NPTN/GJB2/GLS2/VPS4A/BMP10/PIGW/IUZOMO1/GPR26/GPER1/MRPS18B/DNAJC15/TMOD4/NME7/ANXA2/HAS1/KCNIP2/NRG1/ANXA6/HK1/ANXA13/HMGA1/A/CACB/HPCA/ACADL/HSPA1L/HSP90AA1/HSP90AB1/ZC3H12D/COL28A1/FMN1/BARHL2/IGF1/IGF2/CYR61/IL6/AQP2/AQP5/INHBA/AQP9/ISL1/ITGA7/ITGB2/ITGB7/JUP/USP50/HILS1/ATP9B/KDR/ACAT1/KIF25/KRT15/AMIGO3/INSC/HES5/LAMA3/STMN1/LCP1/ARHGDI1/LLGL1/LMNA/LOX/LTBP1/SMAD3/ME1/MAP3K1/MF12/MITF/MP2/MYH4/MYL2/NUBP1/NEDD9/NEU1/NOV/NRAS/NTF3/ATP5B/ANO7/PALM/PARK2/UTP11L/LEF1/DDX47/PRR16/ANGPT4/C11orf73/SIRT6/ATP8A2/PKHD1/PLA2G2A/PLEC/PRKAG3/PML/TREM1/SSH1/FBLIM1/PALMD/LPCAT2/BANP/PIWIL2/ELP3/PRMT6/GOLPH3L/MIS18BP1/PEX26/LIMS2/PARVA/TTCT17/IFT122/CSGALNACT1/PRKD1/BIN3/MAPK3/MAP2K2/TRPV5/PRMT8/HTRA1/SLAMF8/CDC42SE1/PSMB4/PAK6/SGMA/TRPC7/PSMD7/ACTR3B/TENM2/GATAD2B/ERMN/MARK4/CCAR2/PXN/RASGRF2/RFC2/TRIM27/EXOCA/RPA3/RPL8/RPL29/S100A4/S100A6/CCL11/MRPS14/PARV6/NOD2/SFRP2/DNAI2/SGK1/MICAL1/TMEM237/VPS33A/BMP4/BMPR1B/SLIT1/BRD9/SOX9/SRP68/STAT2/SUPT6H/BST2/VAMP2/TCEB2/ACTC1/TERF1/TCHH/TNFAIP3/TNFRSF1A/TNXP/TRA1/TRPC4/TRPC6/TWIST1/WNT10B/YWHAG/CA7/CACNB2/PAX8/CXCR4/FZD5/RAB7A/ERI3/LST1/C6orf25/COL18A1/CALR/COL21A1/SLURP/CAPS/COLQ/CAPZB/HIST1H2BM/SH3BGLR3/HIST1H3A/DYNLRB2/ANTXR1/BFSP2/CASQ1/HOPX/PARD6G/PARD6B/TTBK1/KDM2B/LOXL3/MGARP/CBX2/RAE1/GAS7/SCIN/TP63/RUNX3/IRS2/ACTN1/FADD/SPHK1/CCNA1/SKAP2/LIMD1/ERI1/MAP7/PRC1/SYT7/LDB2/CBFA2T2/AURKB/TRIP10/ADIPOQ/H2AFY/ARHGEF10/MICAL2/NUP93/RAPGEF2/ULK2/USP6NL/IQSEC1/FGF19 | 351 |
| GO:0070588 | calcium ion transmembrane transport            | 22/901  | 182/17046  | 0.00025 | 0.00674 | 0.0053  | TRDN/C15orf27/TRPM6/TRPV3/DRD4/RASA3/ATP1A2/OPRL1/PIK3CG/TLR9/TRPV6/CHRNA9/TRPV5/TRPC7/BMP4/SLC8A1/TRPC4/TRPC6/TRPM2/CACNA1E/CACNB2/SMDT1                                                                                                                                                                                                                                                                                                                                                                                                                                                                                                                                                                                                                                                                                                                                                                                                                                                                                                                                                                                                                                                                                                                                                                                                                                                                                                                                                                                                                                                                                                                                                                                                                                                                                                                                                                                                                                                                                                                                                                                                                                                                                | 22  |
| GO:0072132 | mesenchyme morphogenesis                       | 8/901   | 33/17046   | 0.00025 | 0.00674 | 0.0053  | FOXC2/ISL1/SMAD3/LEF1/ACTA2/SOX9/ACTC1/TWIST1                                                                                                                                                                                                                                                                                                                                                                                                                                                                                                                                                                                                                                                                                                                                                                                                                                                                                                                                                                                                                                                                                                                                                                                                                                                                                                                                                                                                                                                                                                                                                                                                                                                                                                                                                                                                                                                                                                                                                                                                                                                                                                                                                                            | 8   |
| GO:0006816 | calcium ion transport                          | 35/901  | 352/17046  | 0.00025 | 0.00674 | 0.0053  | TRDN/CLCA1/CCR1/C15orf27/TRPM6/CTGF/TRPV3/BHLHA15/DRD4/RASA3/CRACR2B/GPER1/ANXA6/LCK/ATP1A2/NFATC3/OPRL1/PIK3CG/PML/TLR9/TRPV6/CHRNA9/PRKD1/TRPV5/TRPC7/TRIM27/BMP4/SLC8A1/TRPC4/TRPC6/TRPM2/CACNA1E/CACNB2/CA5Q1/SMDT1                                                                                                                                                                                                                                                                                                                                                                                                                                                                                                                                                                                                                                                                                                                                                                                                                                                                                                                                                                                                                                                                                                                                                                                                                                                                                                                                                                                                                                                                                                                                                                                                                                                                                                                                                                                                                                                                                                                                                                                                  | 35  |
| GO:1901137 | carbohydrate derivative biosynthetic process   | 61/901  | 729/17046  | 0.00025 | 0.00674 | 0.0053  | GNE/TCIRG1/NPFFR2/ADCY3/B4GALT7/ACOT7/GALNT15/SLC51B/NEU4/ADM/PAR4/B3GLCT/MGAT5B/ADRB3/ADAL/DDOST/DRD4/TRAK1/FOXL1/GABBR1/ST6GALNAC3/GBGT1/SLC17A5/AMPD2/AMPD3/GNAS/PIGW/GPER1/EOGT/GUCY1A3/NME7/HAS1/ACACB/HPCA/NME9/IGF1/MUC21/LHCGR/MC2R/MGAT1/NEU1/NPPC/OAS2/OPRL1/ATP5B/PALM/C/HST15/SIRT6/GALNT7/PIGC/PKM/CYTL1/CSGALNACT1/MRAP/SCT/BMPR1B/CCR2/UPP1/MOGS/CALR/QTRT1                                                                                                                                                                                                                                                                                                                                                                                                                                                                                                                                                                                                                                                                                                                                                                                                                                                                                                                                                                                                                                                                                                                                                                                                                                                                                                                                                                                                                                                                                                                                                                                                                                                                                                                                                                                                                                               | 61  |
| GO:0009607 | response to biotic stimulus                    | 68/901  | 837/17046  | 0.00026 | 0.00703 | 0.00553 | SPON2/GJB6/HNRNPUL1/CHGA/CNP/ADM/CPS1/CYP11A1/COCH/NLRP6/DMBT1/UNC13D/FGA/FGF10/SBNO2/ACIN1/PUM2/SLC37A4/GSTP1/GUCY1A3/HLA-B/HLA-E/HMGA1/IL1RN/IL6/IL10RA/IL12RB2/IRF1/KCNJ8/STMN1/LCK/LGALS9/SMAD3/OAS2/PLA2G2A/PML/TLR9/TREM1/MAPK3/HTRA1/SLAMF8/PTGFR/CREBZF/ACTA2/DEFB134/CCL11/NOD2/SYNDIG1L/BPI/STAT2/BST2/TLR5/TNFAIP3/TNFRSF1A/CA7/CXCR4/FZD5/NLRX1/ZC3H12A/UNC93B1/HIST1H3A/IFITM1/FADD/TNFRSF11A/RSAD2/CD8A/LY86/NUP93                                                                                                                                                                                                                                                                                                                                                                                                                                                                                                                                                                                                                                                                                                                                                                                                                                                                                                                                                                                                                                                                                                                                                                                                                                                                                                                                                                                                                                                                                                                                                                                                                                                                                                                                                                                         | 68  |
| GO:1901135 | carbohydrate derivative metabolic process      | 89/901  | 1167/17046 | 0.00027 | 0.00727 | 0.00572 | GNE/TCIRG1/NPFFR2/ADCY3/LECT1/B4GALT7/ACOT7/GALNT15/SLC51B/NEU4/COL11A1/ADM/EGFLAM/PAR4/B3GLCT/MGAT5B/MBOAT1/ADRB3/ADAL/DDOST/DLG2/DNMT3A/DRD4/ENO2/TRAK1/FOXL1/AKR1B1/FUCA1/GABBR1/ST6GALNAC3/FBXO2/GBG1/GAPDHS/SLC17A5/AMPD2/PDE7B/AMPD3/GNAS/PIGW/GPER1/EOGT/DNAJC15/GUCY1A3/NME7/HAS1/HK1/ACACB/HPCA/NME9/IGF1/ITIH3/ITIH4/MUC21/LHCGR/MC2R/MGAT1/NUDT1/MYH4/NDUFB4/NEU1/ATP1A2/NPPC/OAS2/OPRL1/ATP5B/PALM/SPOCK3/CHST15/PDE4C/PDE7A/SIRT6/PDE6B/GALNT7/PGAM2/PIGC/PKM/PLA2G2A/CYTL1/SMPD3/CSGALNACT1/MRAP/SCT/CERK/BMPR1B/CCR2/UPP1/MOGS/CALR/QTRT1                                                                                                                                                                                                                                                                                                                                                                                                                                                                                                                                                                                                                                                                                                                                                                                                                                                                                                                                                                                                                                                                                                                                                                                                                                                                                                                                                                                                                                                                                                                                                                                                                                                                 | 89  |
| GO:1900034 | regulation of cellular response to heat        | 12/901  | 70/17046   | 0.00028 | 0.00727 | 0.00572 | NUP210/MTOR/DNAJC2/HSPA1L/HSP90AA1/HSP90AB1/C11orf73/MAPK3/CCAR2/RPA3/RAE1/NUP93                                                                                                                                                                                                                                                                                                                                                                                                                                                                                                                                                                                                                                                                                                                                                                                                                                                                                                                                                                                                                                                                                                                                                                                                                                                                                                                                                                                                                                                                                                                                                                                                                                                                                                                                                                                                                                                                                                                                                                                                                                                                                                                                         | 12  |
| GO:0072521 | purine-containing compound metabolic process   | 47/901  | 524/17046  | 0.00028 | 0.00735 | 0.00578 | TCIRG1/NPFFR2/ADCY3/ACOT7/ADM/ADRB3/ADAL/DLG2/DNMT3A/DRD4/ENO2/FHIT/GABBR1/GAPDHS/AMPD2/PDE7B/AMPD3/GNAS/GPER1/DNAJC15/GUCY1A3/NME7/HK1/A/CACB/HPCA/NME9/IGF1/LHCGR/MC2R/NUDT1/MYH4/NDUFB4/ATP1A2/NPPC/OAS2/OPRL1/ATP5B/PALM/PDE4C/PDE7A/SIRT6/PDE6B/PGAM2/PKM/MRAP/SCT/CCR2                                                                                                                                                                                                                                                                                                                                                                                                                                                                                                                                                                                                                                                                                                                                                                                                                                                                                                                                                                                                                                                                                                                                                                                                                                                                                                                                                                                                                                                                                                                                                                                                                                                                                                                                                                                                                                                                                                                                             | 47  |

|            |                                                       |         |            |         |         |         |                                                                                                                                                                                                                                                                                                                                                                                                                                                                                                                                                                                                                                                                                                                                                                                                                                                                                                                                                                                                                                                                                                                                                                                                                                                                                                                                                                                                                                                                                                                                                                                                                                                                                                                                                                                                                                                                                                                                                                                                                                                                                                                                                                               |     |
|------------|-------------------------------------------------------|---------|------------|---------|---------|---------|-------------------------------------------------------------------------------------------------------------------------------------------------------------------------------------------------------------------------------------------------------------------------------------------------------------------------------------------------------------------------------------------------------------------------------------------------------------------------------------------------------------------------------------------------------------------------------------------------------------------------------------------------------------------------------------------------------------------------------------------------------------------------------------------------------------------------------------------------------------------------------------------------------------------------------------------------------------------------------------------------------------------------------------------------------------------------------------------------------------------------------------------------------------------------------------------------------------------------------------------------------------------------------------------------------------------------------------------------------------------------------------------------------------------------------------------------------------------------------------------------------------------------------------------------------------------------------------------------------------------------------------------------------------------------------------------------------------------------------------------------------------------------------------------------------------------------------------------------------------------------------------------------------------------------------------------------------------------------------------------------------------------------------------------------------------------------------------------------------------------------------------------------------------------------------|-----|
| GO:0016043 | cellular component organization                       | 344/901 | 5594/17046 | 0.00028 | 0.00735 | 0.00578 | AKT3/ABI1/CDH3/CDH9/TSPAN5/CDH12/CDH13/FARP1/TCIRG1/TRDN/SPON2/TACC2/PDPN/CELF1/TBR1/SEPT9/ADCY3/TMED10/LECT1/RER1/ESM1/PSIP1/PKP3/EGLN2/ATXN2L/B4GALT7/EXOC3/CHRNA1/CHRNA2/GPRIN1/CIDEA/C1QTNF7/PANX3/CLN5/MRPL52/FRMD6/SLC51B/SEZ6/CNP/APOA1BP/COL9A3/COL11A1/COMP/SLCT1/ZFP42/ADM/EGFLAM/NDUF66/MPP7/FAM101A/CTGF/SMYD1/SGOL1/SH3D19/CYLD/FITM1/DBB1/WBP2NL/DDOST/RNF168/BHLHA15/COCH/DLG2/DNMT3A/DSG3/EFNA2/EGFR/PATL2/A2M/ELK4/TMEM17/EML1/UNC13D/EPHA1/EPHA3/EPHB4/ESR1/ALAS1/SPATA13/PHACTR1/FGA/FGF10/RASA3/PPM1E/BTBD3/MSRB2/ACIN1/LIMCH1/FOXO2/SPG20/NFASC/EPB41L3/FLNB/FLOT2/MLC1/TBC1D1/NUP210/ATP11A/NEDD4L/SYNE1/PUM2/ARHGFB18/RYPB/MAPK8IP2/MTOR/SLC37A4/SAMM50/DFNB31/ALS2CL/TENM4/GAS2/SACS/PLEK2/DNAJC2/FGF22/NPTN/GJB2/GLS2/VPS4A/BMP10/PIGW/IZUMO1/GPR26/GPER1/MRPS18B/DNAJC15/TMOD4/NME7/ANXA2/HAS1/KCNIP2/NRG1/ANXA6/HK1/ANXA13/HMGA1/ACACB/HPCA/ACADL/HSPA1L/HSP90AA1/HSP90AB1/ZC3H12D/COL28A1/FMN1/BARHL2/IGF1/IGF2/CYR61/IL6/AQP2/AQP5/INHBA/AQP9/ISL1/ITGA7/ITGB2/ITGB7/JUP/USP50/HILS1/ATP9B/KDR/ACAT1/KIF25/KRT15/AMIGO3/INSC/HESS/LAMA3/STMN1/LCP1/ARHGDI/LLGL1/LMNA/LOX/ITBP1/SMAD3/ME1/MAP3K1/MFI2/MITF/MPZ/MYH4/MYL2/NUBP1/NEDD9/NEU1/NOV/NRAS/NTF3/ATP5B/ANO7/PALM/PARK2/LEF1/PRR16/ANGPT4/C11orf73/SIRT6/ATP8A2/PKHD1/PLA2G2A/PLEC/PRKAG3/PML/TREM1/SSH1/FBLIM1/PALMD/LPCAT2/BANP/PIWIL2/ELP3/PRMT6/GOLPH3L/MIS18BP1/PEX26/LIMS2/PARVA/TTC17/IFT122/CSGALNACT1/PRKD1/BIN3/MAPK3/MAP2K2/TRPV5/PRMT8/HTRA1/SLAMF8/CDC42SE1/PSMB4/PAK6/RGMA/TRPC7/PSMD7/ACTR3B/TENM2/GATAD2B/ERMN/MARK4/CCAR2/PXN/RASGRF2/RFC2/TRIM27/EXOC4/RPA3/RPL8/RPL29/S100A4/S100A6/CCL11/MRPS14/PARVG/NOD2/SFRP2/DNAI2/SGK1/MICAL1/TMEM237/VPS33A/BMP4/BMPR1B/SLIT1/BRD9/SOX9/SRP68/STAT2/SUPT6H/BST2/VAMP2/TCEB2/ACTC1/TERF1/TCHH/TNFAIP3/TNFRSF1A/TNFB/TRAFF1/TRPC4/TRPC6/TWIST1/WNT10B/YWHAG/CA7/CACNB2/PAX8/CXCR4/FZD5/RAB7A/LST1/C6orf25/COL18A1/CALR/COL21A1/SLIRP/CAPS/COLQ/CAPZB/HIST1H2BM/SH3BGL3/HIST1H3A/DYNLRB2/ANTXR1/BFSP2/CASQ1/HOPX/PARD6G/PARD6B/TBK1/KDM2B/LOXL3/MGARP/CBX2/RAE1/GAS7/SCIN/TP63/RUNX3/IRS2/ACTN1/FADD/SPHK1/CCNA1/SKAP2/LIMD1/MAP7/PRC1/SYT7/CBFA2T2/AURKB/TRIP10/ADIPOQ/H2AFY/ARHGFB10/MICAL2/NUP93/RAPGEF2/ULK2/USP6NL/IQSEC1/FGF19 | 344 |
| GO:0010468 | regulation of gene expression                         | 245/901 | 3819/17046 | 0.0003  | 0.0077  | 0.00606 | CDH3/ZNF783/CDH13/MBNL2/CDKN1C/C1D/ZBTB18/DMRT2/CELF1/TBR1/PNRC1/HNRNPUL1/ERLIN2/PSIP1/EGLN2/ZBED9/CIDEA/CCR1/ZFP42/IL13RA/ZNF358/LDLRAD3/ZNF738/CTGF/SMYD1/CYLD/ZNF782/ZNF709/ZNF781/CITED4/RNF168/ZNF366/BHLHA15/DNMT3A/EEF2/EGFR/EGR3/PATL2/EIF4G1/A2M/ELK4/ESR1/SP8/FGF10/FHIT/XRN2/SBNO2/TRAK1/MSRB2/ACIN1/FOXO1/FOXO2/FOXO1/SPG20/DIP2A/FLOT2/NEDD4L/LARP1/PUM2/RYPB/VGLL2/MTOR/ZNF549/PABPC1/DNAJC2/DKK3/BMP10/ZNF638/GNAS/ZNF311/ZNF844/GPER1/ZBTB44/GTF2B/BRF1/SOX8/NRG1/HLX/HMGA1/NR4A1/APBA2/HOXB3/HOXC4/HOXC5/HOXC6/HOXD3/TFAP2E/ID3/BARHL2/IGF1/IGF2/CYR61/IL6/IL16/FOXK2/INHBA/IRF1/ISL1/JUP/USP50/HILS1/HESS/AFF3/LCK/LGALS9/LMNA/LMO2/SMAD3/MEF2D/MEOX1/MEOX2/MFI2/MITF/LHX8/MOV10/NFATC3/NFYB/NHLH2/NOV/NRAS/NTF3/PARK2/LEF1/PRR16/SIRT6/PITX2/PKHD1/PLAGL1/PML/RIPPLY3/RIPK4/TLR9/CYTL1/POMC/POU2AF1/BNC2/MED18/BANP/PPP1CB/PPP1CC/PIWIL2/ELP3/PRMT6/DNAJC17/ZNF532/CNOT11/PRKD1/MYNN/MAPK3/MAP2K2/PRMT8/MASP1/HTRA1/PAK6/ARNTL2/RGMA/PRDM11/PTGFR/TENM2/GATAD2B/METTL14/CCAR2/CREBZF/ACTA2/TRIM27/NPAS3/NOD2/SFRP2/TRA2B/GZF1/SGK1/BMP4/ZNF649/BMPR1B/BRD9/ZSCAN18/SOX9/STAT2/STK3/SUPT6H/TAFA4/TBP/TCEA1/TCEB2/ZEB1/ACTC1/TEAD3/TLE3/TNFAIP3/TNFRSF1A/TRAFF1/TRAFF5/PHLDA2/TWIST1/TNFRSF4/UCP1/VARS/WNT10B/ZNF7/ZNF124/ZNF177/PAX8/FZD5/CARD14/ZNF665/ZC3H14/ZNF606/ZC3H12A/CPEB4/ZNF436/CALR/SLIRP/SCRT1/HIST1H3A/SLA2/ZNF397/NROB2/HOPX/TRIM63/KDM2B/LOXL3/CBX2/GAS7/RUNX1/TP63/RUNX3/FADD/TNFRSF11A/ALDH1A2/SPHK1/BUD31/CCNA1/LIMD1/ERI1/PIAS2/LDB2/CBFA2T2/AURKB/ADIPOQ/H2AFY/MICAL2/VGLL4/ZBTB39/FGF19/NR1H4                                                                                                                                                                                                                                                                                                                                                                                                                                                                                                                                                                                                                                         | 245 |
| GO:0010675 | regulation of cellular carbohydrate metabolic process | 19/901  | 148/17046  | 0.0003  | 0.0077  | 0.00606 | SLC51B/FOXO1/MTOR/GAPDH5/GPER1/GRB10/HRH1/IGF1/IGF2/IL6/LHCGR/PARK2/SIRT6/PGAM2/POMC/PPP1CB/PHLDA2/IRS2/ADIPOQ                                                                                                                                                                                                                                                                                                                                                                                                                                                                                                                                                                                                                                                                                                                                                                                                                                                                                                                                                                                                                                                                                                                                                                                                                                                                                                                                                                                                                                                                                                                                                                                                                                                                                                                                                                                                                                                                                                                                                                                                                                                                | 19  |
| GO:0035107 | appendage morphogenesis                               | 19/901  | 148/17046  | 0.0003  | 0.0077  | 0.00606 | ZNF358/EC1/SP8/FGF10/GNAS/FLVCR1/RSPO2/FMN1/AFF3/LEF1/PITX2/IFT122/SFRP2/BMP4/BMPR1B/SOX9/TWIST1/TP63/ALDH1A2                                                                                                                                                                                                                                                                                                                                                                                                                                                                                                                                                                                                                                                                                                                                                                                                                                                                                                                                                                                                                                                                                                                                                                                                                                                                                                                                                                                                                                                                                                                                                                                                                                                                                                                                                                                                                                                                                                                                                                                                                                                                 | 19  |
| GO:0035108 | limb morphogenesis                                    | 19/901  | 148/17046  | 0.0003  | 0.0077  | 0.00606 | ZNF358/EC1/SP8/FGF10/GNAS/FLVCR1/RSPO2/FMN1/AFF3/LEF1/PITX2/IFT122/SFRP2/BMP4/BMPR1B/SOX9/TWIST1/TP63/ALDH1A2                                                                                                                                                                                                                                                                                                                                                                                                                                                                                                                                                                                                                                                                                                                                                                                                                                                                                                                                                                                                                                                                                                                                                                                                                                                                                                                                                                                                                                                                                                                                                                                                                                                                                                                                                                                                                                                                                                                                                                                                                                                                 | 19  |
| GO:0009611 | response to wounding                                  | 76/901  | 965/17046  | 0.0003  | 0.0077  | 0.00606 | CDH3/KCNMB2/MRVI1/CCR1/ADM/CTGF/NLRP6/A2M/F11/FGA/FGF10/VASH1/SBNO2/FOXO2/GATM/GNAS/GPER1/FFAR2/SCG3/GSTP1/GUCY1A3/ANXA2/SERPIND1/NRG1/ID3/IGF1/IGF2/CYR61/IL1R1/IL6/IRF1/ISL1/ITGB2/KCNMB1/LCK/LOX/SMAD3/MAP3K1/NOV/NRAS/ANGPT4/PIK3CG/PKM/PLA2G2A/IL20RB/TLR9/TREM1/APBB1P/PRKAR1B/BIN3/MAPK3/MAP2K2/PROC/MASP1/PSMB4/TRPC7/NOD2/BMP4/SLC8A1/TIMP3/TNFAIP3/TNFRSF1A/TRPC6/CCR2/WNT10B/NLRX1/C6orf25/CAPZB/HIST1H3A/HOPX/ACTN1/TNFRSF11A/SYT7/ESAM/SLC16A3/ADIPOQ                                                                                                                                                                                                                                                                                                                                                                                                                                                                                                                                                                                                                                                                                                                                                                                                                                                                                                                                                                                                                                                                                                                                                                                                                                                                                                                                                                                                                                                                                                                                                                                                                                                                                                            | 76  |
| GO:0048144 | fibroblast proliferation                              | 13/901  | 81/17046   | 0.00031 | 0.0078  | 0.00613 | B4GALT7/EGFR/ESR1/FGF10/MORC3/GSTP1/ANXA2/IGF1/NRAS/SIRT6/PML/S100A6/SPHK1                                                                                                                                                                                                                                                                                                                                                                                                                                                                                                                                                                                                                                                                                                                                                                                                                                                                                                                                                                                                                                                                                                                                                                                                                                                                                                                                                                                                                                                                                                                                                                                                                                                                                                                                                                                                                                                                                                                                                                                                                                                                                                    | 13  |

|            |                                                      |         |            |         |         |         |                                                                                                                                                                                                                                                                                                                                                                                                                                                                                                                                                                                                                                                                                                                                                                                                                                                                                                                                                                                                                                                                                                                                                                                                                                                                                                                                                                                                                                                                                                                                                                  |     |
|------------|------------------------------------------------------|---------|------------|---------|---------|---------|------------------------------------------------------------------------------------------------------------------------------------------------------------------------------------------------------------------------------------------------------------------------------------------------------------------------------------------------------------------------------------------------------------------------------------------------------------------------------------------------------------------------------------------------------------------------------------------------------------------------------------------------------------------------------------------------------------------------------------------------------------------------------------------------------------------------------------------------------------------------------------------------------------------------------------------------------------------------------------------------------------------------------------------------------------------------------------------------------------------------------------------------------------------------------------------------------------------------------------------------------------------------------------------------------------------------------------------------------------------------------------------------------------------------------------------------------------------------------------------------------------------------------------------------------------------|-----|
| GO:1902578 | single-organism localization                         | 242/901 | 3769/17046 | 0.00031 | 0.00798 | 0.00627 | ABI1/CDH3/TSPAN5/KCNMB2/TCIRG1/TRDN/ABCA9/SPON2/COG5/ADCY3/TMED10/SLC27A2/RER1/CHGA/CHI3L1/PKP3/EXOC3/CHRNA1/CHRNA2/CHRNA5/CIDEA/PANX3/AP351/CLCA1/CCR1/SLC51B/C15orf27/SLC38A10/CNP/ADM/TRPM6/KLC3/CTGF/ABCC13/SH3D19/CYB561/CYLD/TRPV3/DDOST/BHLHA15/NLRP6/DLG2/ABAT/DRD4/AGXT/EGFR/A2M/UNC13D/SLC10A4/FCGR2A/FGA/FGF10/RASA3/TRA11/EXPH5/NFASC/EPB41L3/FLNB/FLOT2/MCL1/NUP210/ATP11A/NEDD4L/SYNE1/MORC3/MAPK8IP2/MTOR/SLC37A4/SAMM50/STEAP2/SLC17A5/GJA3/GJB2/GLS2/VPS4A/GNAS/CRACR2B/PIGW/GPR26/GPER1/FFAR2/GRB10/FLVCR1/GRIK4/DNAJC15/SCG3/NME7/ANXA2/KCNIP2/NRG1/ANXA6/HK1/ANXA13/HLA-E/ACACB/HPCA/HSPA1L/HSP90AA1/HSP90AB1/HTR3A/IGF1/IGF2/IL1RN/IL6/AQP2/AQP5/INHBA/AQP9/ISL1/ITGB2/ITGB7/JUP/ATP9B/KCNH2/KCNJ8/KCNJ9/KCNMB1/IPO5/INSC/TOMM20L/SLC6A17/LCK/LDLR/LGALS9/LLGL1/LMNA/SMAD3/MFI2/ATP1A2/NFATC3/NOV/NZF3/OPRL1/SLC22A18/P2RY6/ATP5B/ANO7/PALM/PARK2/PDE4C/PCYOX1/C11orf73/SIRT6/ATP8A2/PIK3CG/PRKAG3/PML/FXYD6/SLCO1C1/PNLIP/TLR9/TREM1/POMC/PON1/ZDHHC13/GOLPH3L/SLC47A1/SLC29A3/TRPV6/SMPD3/SLC30A10/CHRNA9/SYBU/PEX26/PRKAR1B/IFT122/LMBRD1/PRKD1/APOBR/PRK3/PRK2K2/TRPV5/CDC42SE1/TRPC7/RASGRF2/TRIM27/EXOC4/RPL8/RPL29/S100A6/SCT/NOD2/TINAGL1/STRA6/SFRP2/SGK1/VP33A/BMP4/SLC4A1/SLC6A12/SLC8A1/SLC9A3/SLC20A2/SRP68/SUPT6H/VAMP2/TGM2/TRAPP10/TNFRSF1A/TRPC4/TRPC6/TRPM2/TWIST1/CCR2/TNFRSF4/UCP1/YWHAG/CA7/CACNA1E/CACNB2/PAX8/FZD5/RAB7A/RAB11FIP1/CALR/COLQ/SLC25A18/MFSD7/ATP13A4/NROB2/MON1A/CASQ1/MGARP/RAE1/SLC43A1/SCIN/IRS2/ACTN1/TNFRSF11A/SPHK1/MAP7/SYT7/SLC16A3/RSAD2/SMDT1/ADIPOQ/RAB3D/NUP93/RAPGEF2/USP6NL/FGF19/NR1H4 | 242 |
| GO:0005977 | glycogen metabolic process                           | 12/901  | 71/17046   | 0.00032 | 0.00798 | 0.00628 | CPS1/MTOR/GRB10/IGF1/IGF2/PRKAG3/POMC/PPP1CB/PPP1CC/PHLDA2/IRS2/STBD1                                                                                                                                                                                                                                                                                                                                                                                                                                                                                                                                                                                                                                                                                                                                                                                                                                                                                                                                                                                                                                                                                                                                                                                                                                                                                                                                                                                                                                                                                            | 12  |
| GO:0060438 | trachea development                                  | 6/901   | 19/17046   | 0.00032 | 0.00807 | 0.00635 | RSPO2/LEF1/MAPK3/MAP2K2/BMP4/SOX9                                                                                                                                                                                                                                                                                                                                                                                                                                                                                                                                                                                                                                                                                                                                                                                                                                                                                                                                                                                                                                                                                                                                                                                                                                                                                                                                                                                                                                                                                                                                | 6   |
| GO:0002694 | regulation of leukocyte activation                   | 38/901  | 399/17046  | 0.00033 | 0.00831 | 0.00654 | MAP3K8/IL13RA/CYLD/EGR3/UNC13D/FGF10/FLOT2/MTOR/GPER1/HLA-DOA/HLA-DPA1/HLA-E/HLX/ZC3H12D/IGF1/IGF2/IL6/INHBA/IRF1/LCK/LGALS9/IL20RB/PAG1/PTPRE/NOD2/BMP4/BPI/SUPT6H/ZEB1/TNFAIP3/CCR2/TNFRSF4/ZAP70/LST1/ZC3H12A/SLA2/IRS2/FADD                                                                                                                                                                                                                                                                                                                                                                                                                                                                                                                                                                                                                                                                                                                                                                                                                                                                                                                                                                                                                                                                                                                                                                                                                                                                                                                                  | 38  |
| GO:0035265 | organ growth                                         | 17/901  | 126/17046  | 0.00034 | 0.00851 | 0.0067  | COMP/ESR1/FGF10/FOXC2/TENM4/BMP10/FLVCR1/NRG1/HLX/ACACB/RSPO2/IGF1/NPPC/SIRT6/BNC2/SOX9/STK3                                                                                                                                                                                                                                                                                                                                                                                                                                                                                                                                                                                                                                                                                                                                                                                                                                                                                                                                                                                                                                                                                                                                                                                                                                                                                                                                                                                                                                                                     | 17  |
| GO:0009259 | ribonucleotide metabolic process                     | 43/901  | 471/17046  | 0.00035 | 0.0086  | 0.00676 | TCIRG1/NPFR2/ADCY3/ACOT7/ADM/ADRB3/DLG2/DRD4/ENO2/GABBR1/GAPDH5/AMPD2/PDE7B/AMPD3/GNAS/GPER1/DNAJC15/GUCY1A3/NME7/HK1/ACACB/HPCA/NME9/IGF1/LHCGR/MC2R/MYH4/NDUF84/ATP1A2/NPPC/OPRL1/ATP5B/PALM/PDE4C/PDE7A/SIRT6/PDE6B/PGAM2/PKM/MRAP/SCT/CCR2/UUP1                                                                                                                                                                                                                                                                                                                                                                                                                                                                                                                                                                                                                                                                                                                                                                                                                                                                                                                                                                                                                                                                                                                                                                                                                                                                                                              | 43  |
| GO:0051046 | regulation of secretion                              | 54/901  | 633/17046  | 0.00036 | 0.00878 | 0.0069  | CHGA/CIDEA/NLRP6/ABAT/DRD4/UNC13D/FGA/FGF10/EXPH5/VPS4A/GNAS/GPER1/FFAR2/NRG1/HLA-E/IGF1/IL1RN/IL6/INHBA/ISL1/LGALS9/LLGL1/NOV/OPRL1/PARK2/PDE4C/PML/TLR9/POMC/GOLPH3L/TRPV6/SMPD3/SYBU/PRKAR1B/TRIM27/SCT/NOD2/SGK1/VAMP2/TWIST1/CCR2/TNFRSF4/CACNA1E/PAX8/RAB7A/RAB11FIP1/NROB2/SCIN/IRS2/TNFRSF11A/SYT7/RSAD2/ADIPOQ/RAB3D                                                                                                                                                                                                                                                                                                                                                                                                                                                                                                                                                                                                                                                                                                                                                                                                                                                                                                                                                                                                                                                                                                                                                                                                                                    | 54  |
| GO:0050679 | positive regulation of epithelial cell proliferation | 19/901  | 150/17046  | 0.00036 | 0.00881 | 0.00693 | CDH3/CDH13/EGFR/EGR3/FGF10/MTOR/NR4A1/IGF1/IL6/KDR/PRKD1/HTRA1/CCL11/NOD2/BMP4/SOX9/TNFAIP3/TWIST1/TP63                                                                                                                                                                                                                                                                                                                                                                                                                                                                                                                                                                                                                                                                                                                                                                                                                                                                                                                                                                                                                                                                                                                                                                                                                                                                                                                                                                                                                                                          | 19  |
| GO:0006073 | cellular glucan metabolic process                    | 12/901  | 72/17046   | 0.00036 | 0.00883 | 0.00694 | CPS1/MTOR/GRB10/IGF1/IGF2/PRKAG3/POMC/PPP1CB/PPP1CC/PHLDA2/IRS2/STBD1                                                                                                                                                                                                                                                                                                                                                                                                                                                                                                                                                                                                                                                                                                                                                                                                                                                                                                                                                                                                                                                                                                                                                                                                                                                                                                                                                                                                                                                                                            | 12  |
| GO:0044042 | glucan metabolic process                             | 12/901  | 72/17046   | 0.00036 | 0.00883 | 0.00694 | CPS1/MTOR/GRB10/IGF1/IGF2/PRKAG3/POMC/PPP1CB/PPP1CC/PHLDA2/IRS2/STBD1                                                                                                                                                                                                                                                                                                                                                                                                                                                                                                                                                                                                                                                                                                                                                                                                                                                                                                                                                                                                                                                                                                                                                                                                                                                                                                                                                                                                                                                                                            | 12  |
| GO:0071593 | lymphocyte aggregation                               | 38/901  | 401/17046  | 0.00037 | 0.00889 | 0.00699 | MAP3K8/CYLD/DDOST/EGR3/FLOT2/MTOR/HLA-DOA/HLA-DPA1/HLA-E/HLX/ZC3H12D/IGF1/IGF2/IL6/IRF1/ITGB2/LCK/LCP1/LGALS9/SMAD3/NFATC3/LEF1/PIK3CG/IL20RB/APBB1P/PAG1/NOD2/BMP4/STK10/ZEB1/CCR2/TNFRSF4/ZAP70/FZD5/SLA2/FADD/RSAD2/CD8A                                                                                                                                                                                                                                                                                                                                                                                                                                                                                                                                                                                                                                                                                                                                                                                                                                                                                                                                                                                                                                                                                                                                                                                                                                                                                                                                      | 38  |
| GO:0043588 | skin development                                     | 26/901  | 238/17046  | 0.00037 | 0.00889 | 0.00699 | CDH3/APCDD1/CSTA/EGFR/FGF10/EXPH5/FLNB/LCE2B/GNAS/LCE1C/LCE1D/LCE2D/INHBA/IVL/JUP/LTB/LEF1/ATP8A2/SOX9/TCHH/WNT10B/RUNX1/TP63/RUNX3/LDB2/H2AFY                                                                                                                                                                                                                                                                                                                                                                                                                                                                                                                                                                                                                                                                                                                                                                                                                                                                                                                                                                                                                                                                                                                                                                                                                                                                                                                                                                                                                   | 26  |
| GO:0009150 | purine ribonucleotide metabolic process              | 42/901  | 458/17046  | 0.00037 | 0.00889 | 0.00699 | TCIRG1/NPFR2/ADCY3/ACOT7/ADM/ADRB3/DLG2/DRD4/ENO2/GABBR1/GAPDH5/AMPD2/PDE7B/AMPD3/GNAS/GPER1/DNAJC15/GUCY1A3/NME7/HK1/ACACB/HPCA/NME9/IGF1/LHCGR/MC2R/MYH4/NDUF84/ATP1A2/NPPC/OPRL1/ATP5B/PALM/PDE4C/PDE7A/SIRT6/PDE6B/PGAM2/PKM/MRAP/SCT/CCR2                                                                                                                                                                                                                                                                                                                                                                                                                                                                                                                                                                                                                                                                                                                                                                                                                                                                                                                                                                                                                                                                                                                                                                                                                                                                                                                   | 42  |
| GO:0055085 | transmembrane transport                              | 94/901  | 1258/17046 | 0.00037 | 0.00892 | 0.00701 | KCNMB2/TCIRG1/TRDN/ABCA9/ADCY3/CHRNA1/CHRNA2/CHRNA5/PANX3/CLCA1/C15orf27/SLC38A10/TRPM6/ABCC13/CYB561/TRPV3/DRD4/SLC10A4/RASA3/NUP210/NEDD4L/MAPK8IP2/SLC37A4/SAMM50/SLC17A5/GJA3/GJB2/GNAS/FLVCR1/GRIK4/DNAJC15/KCNIP2/ANXA6/HK1/ACACB/HSPA90AA1/HTR3A/AQP2/AQP5/AQP9/KCNH2/KCNJ8/KCNJ9/KCNMB1/SLC6A17/LDLR/ATP1A2/OPRL1/SLC22A18/ATP5B/ANO7/PCYOX1/PIK3CG/FXYD6/SLCO1C1/TLR9/SLC47A1/SLC29A3/TRPV6/SLC30A10/CHRNA9/PEX26/PRKAR1B/TRPV5/TRPC7/RASGRF2/TRIM27/S100A6/STRA6/SGK1/BMP4/SLC4A1/SLC6A12/SLC8A1/SLC9A3/SLC20A2/VAMP2/TRAPP10/TRPC4/TRPC6/TRPM2/TWIST1/CACNA1E/CACNB2/SLC25A18/MFSD7/ATP13A4/CASQ1/RAE1/SLC43A1/IRS2/SLC16A3/SMDT1/NUP93                                                                                                                                                                                                                                                                                                                                                                                                                                                                                                                                                                                                                                                                                                                                                                                                                                                                                                               | 94  |



|            |                                                         |         |            |         |         |         |                                                                                                                                                                                                                                                                                                                                                                                                                                                                                                                                                                                                                                                                                                                                                                                                                                                                                                                                                                                                                                                                                                           |     |
|------------|---------------------------------------------------------|---------|------------|---------|---------|---------|-----------------------------------------------------------------------------------------------------------------------------------------------------------------------------------------------------------------------------------------------------------------------------------------------------------------------------------------------------------------------------------------------------------------------------------------------------------------------------------------------------------------------------------------------------------------------------------------------------------------------------------------------------------------------------------------------------------------------------------------------------------------------------------------------------------------------------------------------------------------------------------------------------------------------------------------------------------------------------------------------------------------------------------------------------------------------------------------------------------|-----|
| GO:0034113 | heterotypic cell-cell adhesion                          | 9/901   | 44/17046   | 0.00041 | 0.00985 | 0.00775 | FGA/NFASC/IL1RN/ITGA7/ITGB2/ITGB7/JUP/PARVA/ADIPOQ                                                                                                                                                                                                                                                                                                                                                                                                                                                                                                                                                                                                                                                                                                                                                                                                                                                                                                                                                                                                                                                        | 9   |
| GO:0052652 | cyclic purine nucleotide metabolic process              | 19/901  | 152/17046  | 0.00042 | 0.01009 | 0.00794 | NPFRR2/ADCY3/ADM/ADRB3/DRD4/GABBR1/AMPD2/GNAS/GPER1/GUCY1A3/HPCA/LHCGR/MC2R/NPPC/OPRL1/PALM/MRAP/SCT/CCR2                                                                                                                                                                                                                                                                                                                                                                                                                                                                                                                                                                                                                                                                                                                                                                                                                                                                                                                                                                                                 | 19  |
| GO:0009612 | response to mechanical stimulus                         | 22/901  | 189/17046  | 0.00043 | 0.01009 | 0.00794 | CHI3L1/COL11A1/ANKRD23/IL6/IRF1/JUP/LCK/MAP3K1/ATP1A2/ATP8A2/CHRNA9/MAPK3/BGLAP/STRA6/BMP4/SLC8A1/SOX9/TIMP3/TLR5/TNFRSF1A/CRADD/FADD                                                                                                                                                                                                                                                                                                                                                                                                                                                                                                                                                                                                                                                                                                                                                                                                                                                                                                                                                                     | 22  |
| GO:0006936 | muscle contraction                                      | 29/901  | 280/17046  | 0.00043 | 0.01009 | 0.00794 | MRV11/TRDN/CHRNA1/CTGF/DTNA/BMP10/GPER1/TMOD4/GUCY1A3/KCNIP2/ANXA6/KCNH2/LCK/MYH4/MYL2/ATP1A2/ATP8A2/PGAM2/PIK3CG/PXN/ACTA2/SLC8A1/ACTC1/CA                                                                                                                                                                                                                                                                                                                                                                                                                                                                                                                                                                                                                                                                                                                                                                                                                                                                                                                                                               | 29  |
| GO:0031325 | positive regulation of cellular metabolic process       | 179/901 | 2688/17046 | 0.00044 | 0.01025 | 0.00806 | ABI1/CDH3/CDH13/CDKN1C/DMRT2/TBR1/ADCY3/CHI3L1/ERLIN2/PSIP1/CCR1/SLC51B/MAP3K8/ADM/IL31RA/CTGF/SH3D19/ADRB3/CITED4/RNF168/BHLHA15/DRD4/ECE1/EEF2/EGFR/ESR1/FGA/FGF10/RASA3/SBNO2/FOXC2/FOXO1/LARP1/MAPK8IP2/VGLL2/MTOR/RNF144B/GAPDH5/PABPC1/DNAJC2/FGF22/NPTN/BMP10/GNAS/GPER1/DOK7/GRB10/GSTP1/BRF1/GUCY1A3/ANXA2/SOX8/NRG1/HK1/HMGA1/NR4A1/ACACB/HPCA/HRH1/HSP90AA1/HSP90AB1/TFAP2E/BARHL2/IGF1/IGF2/CYR61/IL1RN/IL6/FOXK2/INHBA/IRF1/ISL1/JUP/KDR/HES5/LCK/LDLR/LGALS9/LHCGR/LMNA/LMO2/LTB/SMAD3/MC2R/MEF2D/MAP3K1/MEOX1/MEOX2/MFI2/MITF/NFATC3/NFYB/NHLH2/NPPC/NRAS/NTF3/OPRL1/PARK2/LEF1/PRR16/ANGPT4/PIK3CG/PITX2/PLA2G2A/PLAGL1/PML/RIPK4/TLR9/CYTL1/POMC/BANP/PIWIL2/FANCI/PRKAR1B/PRKD1/MAPK3/MAP2K2/MRAP/PSMB4/PAK6/ARNTL2/RGMA/PSMD7/PXN/RASGRF2/TRIM27/SCT/CCL11/CCL17/NPAS3/NOD2/SFRP2/TRA2B/BMP4/ZNF649/BMPR1B/BOK/SOX9/STK3/STK10/SUPT6H/TBP/TCEA1/TCEB2/ZEB1/TEAD3/TLR5/TNFAIP3/TNFRSF1A/TRAFA1/TRAFA5/TWIST1/CCR2/WNT10B/PAX8/CXCR4/FZD5/CARD14/ZC3H12A/CALR/CDK10/RUNX1/TP63/RUNX3/IRS2/CRADD/FADD/TNFRSF11A/SPHK1/PIAS2/ZFAND2A/MAP3K6/LDB2/CBFA2T2/ADIPOQ/MICAL2/RAPGEF2/FGF19/NR1H4 | 179 |
| GO:0051240 | positive regulation of multicellular organismal process | 96/901  | 1297/17046 | 0.00044 | 0.0104  | 0.00818 | TRDN/SPON2/DMRT2/CELF1/CHI3L1/CCR1/SEZ6/ADM/CPS1/CTGF/DIO3/ABAT/DRD4/EGR3/EIF4G1/EPHA1/EPHA3/FGA/FGF10/ACIN1/FOXC2/NEDD4L/PUM2/TENM4/NPTN/BMP10/GNAS/GPER1/FFAR2/SOX8/NRG1/HLA-DPA1/HLA-E/HLX/ACACB/HOXD3/HRH1/IGF1/CYR61/IL6/IL12RB2/INHBA/IRF1/ISL1/KDR/AMIGO3/LCK/ARHGDI1/LGALS9/LTB/SMAD3/NEU1/NPPC/OPRL1/PALM/PARK2/LEF1/ANGPT4/ATP8A2/PML/IL20RB/TLR9/PRKD1/MAP2K2/SCT/CCL11/NOD2/SFRP2/BMP4/SLC8A1/BMPR1B/SOX9/ZEB1/TEAD3/TLR5/TNFAIP3/TWIST1/CCR2/WNT10B/ZAP70/PAX8/CXCR4/FZD5/NLRX1/IFITM1/SCIN/RUNX1/TP63/FADD/TNFRSF11A/SPHK1/CBFA2T2/RSAD2/ADIPOQ/H2AFY/RAPGEF2                                                                                                                                                                                                                                                                                                                                                                                                                                                                                                                               | 96  |
| GO:0071605 | monocyte chemotactic protein-1 production               | 4/901   | 8/17046    | 0.00046 | 0.0106  | 0.00834 | GSTP1/LGALS9/TWIST1/ADIPOQ                                                                                                                                                                                                                                                                                                                                                                                                                                                                                                                                                                                                                                                                                                                                                                                                                                                                                                                                                                                                                                                                                | 4   |
| GO:0071637 | regulation of monocyte chemotactic protein-1 production | 4/901   | 8/17046    | 0.00046 | 0.0106  | 0.00834 | GSTP1/LGALS9/TWIST1/ADIPOQ                                                                                                                                                                                                                                                                                                                                                                                                                                                                                                                                                                                                                                                                                                                                                                                                                                                                                                                                                                                                                                                                                | 4   |
| GO:0072282 | metanephric nephron tubule morphogenesis                | 4/901   | 8/17046    | 0.00046 | 0.0106  | 0.00834 | SOX8/HES5/SOX9/PAX8                                                                                                                                                                                                                                                                                                                                                                                                                                                                                                                                                                                                                                                                                                                                                                                                                                                                                                                                                                                                                                                                                       | 4   |
| GO:0009190 | cyclic nucleotide biosynthetic process                  | 19/901  | 153/17046  | 0.00046 | 0.01063 | 0.00836 | NPFRR2/ADCY3/ADM/ADRB3/DRD4/GABBR1/AMPD2/GNAS/GPER1/GUCY1A3/HPCA/LHCGR/MC2R/NPPC/OPRL1/PALM/MRAP/SCT/CCR2                                                                                                                                                                                                                                                                                                                                                                                                                                                                                                                                                                                                                                                                                                                                                                                                                                                                                                                                                                                                 | 19  |
| GO:0048146 | positive regulation of fibroblast proliferation         | 10/901  | 54/17046   | 0.00046 | 0.01065 | 0.00837 | EGFR/ESR1/FGF10/ANXA2/IGF1/NRAS/SIRT6/PML/S100A6/SPHK1                                                                                                                                                                                                                                                                                                                                                                                                                                                                                                                                                                                                                                                                                                                                                                                                                                                                                                                                                                                                                                                    | 10  |

|            |                                                          |         |            |         |         |         |                                                                                                                                                                                                                                                                                                                                                                                                                                                                                                                                                                                                                                                                                                                                                                                                                                                                                                                                                                                                                                                                                                                                                                                                                                                                                                                                                                                                                                                                                                                                                                                                                                                                                                                      |     |
|------------|----------------------------------------------------------|---------|------------|---------|---------|---------|----------------------------------------------------------------------------------------------------------------------------------------------------------------------------------------------------------------------------------------------------------------------------------------------------------------------------------------------------------------------------------------------------------------------------------------------------------------------------------------------------------------------------------------------------------------------------------------------------------------------------------------------------------------------------------------------------------------------------------------------------------------------------------------------------------------------------------------------------------------------------------------------------------------------------------------------------------------------------------------------------------------------------------------------------------------------------------------------------------------------------------------------------------------------------------------------------------------------------------------------------------------------------------------------------------------------------------------------------------------------------------------------------------------------------------------------------------------------------------------------------------------------------------------------------------------------------------------------------------------------------------------------------------------------------------------------------------------------|-----|
| GO:0044271 | cellular nitrogen compound biosynthetic process          | 274/901 | 4363/17046 | 0.00047 | 0.01065 | 0.00837 | ZNF783/CDH13/CDKN1C/TCIRG1/C1D/ZBTB18/MTHFS/DMRT2/CELF1/TBR1/NPFFR2/ADCY3/PNRC1/HNRNPUL1/ERLIN2/PSIP1/EGLN2/ACOT7/ZBED9/CIDEA/MRPL52/ZFP42/ADM1/L31RA/CP51/ZNF358/ZNF738/CTGF/SMYD1/CYLD/ADRB3/ZNF782/ADAL/ZNF709/ZNF781/CITED4/DOB1/DDOST/RNF168/ZNF366/BHLHA15/DNMT3A/DRD4/EEF2/EGFR/EGR3/PATL2/EIF4G1/ELK4/ESR1/ALAS1/SP8/FGF10/FHIT/XRN2/SBNO2/TRAK1/MSRB2/FOXL1/FOXO1/FOXO2/FOXO3/NUP210/NEDD4L/LARP1/PUM2/RYPB/VGLL2/MTOR/GABBR1/ZNF549/STG6/ALNAC3/PABPC1/DNAJC2/AMPD2/DKK3/GLS2/AMPD3/BMP10/ZNF638/GNAS/ZNF311/ZNF844/GPER1/MRPS18B/ZBTB44/GTF2B/BRF1/GUCY1A3/NMME7/SOX8/NRG1/HLX/HMGA1/NR4A1/ACACB/HPCA/HOXB3/HOXC4/HOXC5/HOXC6/HOXD3/HSP90AA1/HSP90AB1/TFAP2E/ID3/BAHRL2/NME9/IGF1/IGF2/CYR61/IL6/IL16/FOXK2/INHBA/IRF1/ISL1/JUP/USP50/HILS1/HES5/AFF3/LGALS9/LHCGR/LMO2/SMAD3/MC2R/ME1/MEF2D/MEOX1/MEOX2/MITF/LHX8/MOV10/DRG1/NFATC3/NFYB/NHLH2/NPPC/NTF3/OAS2/OPRL1/ATP5B/PALM/PARK2/LEF1/PRR16/SIRT6/PITX2/PKHD1/PKM/PLAGL1/PRKAG3/PML/RIPPLY3/RIPK4/TLR9/CYTL1/POMC/POU2AF1/BNC2/MED18/BANP/PIWIL2/ELP3/PRMT6/DNAJC17/ZNF532/CNOT11/PRKD1/MYNN/MAPK3/MRAP/PRMT8/PAK6/ARNTL2/RGMA/PRDM11/TENM2/GATAD2B/METTL14/CCAR2/CREBZF/RFC2/TRIM27/RGS12/RPA3/RPL8/RPL29/SCT/MRPS14/NPAS3/NOD2/SFRP2/GZF1/SGK1/BMP4/ZNF649/BMPR1B/BRD9/ZSCAN18/SOX9/SRP68/STAT2/STK3/SUPT6H/TAF4B/TBP/TCEA1/TCEB2/ZEB1/TEAD3/TERF1/TLE3/TLR5/TNFAIP3/TNFRSF1A/TRAFA1/TRAFA5/TWIST1/CCR2/TNFRSF4/UCP1/UPP1/VARS/WNT10B/YWHAG/ZNF7/ZNF124/ZNF177/PAX8/FZD5/CARD14/CERS4/ZNF665/ZNF606/ZC3H12A/CPEB4/ZNF436/CALR/QTRT1/SLIRP/SCRT1/HIST1H3A/SLA2/ZNF397/NR0B2/HOPX/KDM2B/LOXL3/CBX2/RAE1/GAS7/KMO/RUNX1/TP63/RUNX3/ACTN1/FADD/TNFRSF11A/SPHK1/BUD31/CCNA1/LIMD1/PIAS2/LDB2/CBFA2T2/AURKB/ADIPOQ/H2AFY/MICAL2/VGLL4/NUP93/ZBTB39/NR1H4 | 274 |
| GO:0008544 | epidermis development                                    | 30/901  | 295/17046  | 0.00047 | 0.01065 | 0.00837 | CDH3/APCDD1/CSTA/CTGF/EGFR/FGF10/EXPH5/FLNB/FLOT2/LCE2B/GNAS/LCE1C/LCE1D/LCE2D/INHBA/IVL/KRT15/HES5/LAMA3/NTF3/PITX2/BMP4/SOX9/TCHH/WNT10B/RUNX1/TP63/RUNX3/LDB2/H2AFY                                                                                                                                                                                                                                                                                                                                                                                                                                                                                                                                                                                                                                                                                                                                                                                                                                                                                                                                                                                                                                                                                                                                                                                                                                                                                                                                                                                                                                                                                                                                               | 30  |
| GO:0055080 | cation homeostasis                                       | 49/901  | 566/17046  | 0.00047 | 0.01076 | 0.00846 | TCIRG1/TRDN/CLN5/CCR1/ADM/DRD4/ESR1/NEDD4L/STEAP2/NPTN/GPER1/FLVCR1/ANXA6/KCNH2/KDR/LCK/MF12/NUBP1/ATP1A2/OPRL1/ATP5B/PARK2/PDE6B/PIK3CG/PKHD1/PML/SLC30A10/CHRNA9/PRKD1/SLAMF8/TRPC7/CCL11/SGK1/BMP4/SLC4A1/SLC8A1/SLC9A3/TGM2/TRPC4/TRPC6/CCR2/CA7/CXCR4/RAB7A/CALR/ATP13A4/CASQ1/SMDT1/MTL5                                                                                                                                                                                                                                                                                                                                                                                                                                                                                                                                                                                                                                                                                                                                                                                                                                                                                                                                                                                                                                                                                                                                                                                                                                                                                                                                                                                                                       | 49  |
| GO:0034330 | cell junction organization                               | 26/901  | 242/17046  | 0.00048 | 0.01079 | 0.00849 | CDH3/CDH9/CDH12/CDH13/PKP3/MPP7/EPHA3/NFASC/EPB41L3/GJB2/FMN1/JUP/KDR/LAMA3/SMAD3/MPZ/PLEC/FBLIM1/LIMS2/PARVA/PXN/FZD5/PARD6G/PARD6B/ACTN1/RAPGEF2                                                                                                                                                                                                                                                                                                                                                                                                                                                                                                                                                                                                                                                                                                                                                                                                                                                                                                                                                                                                                                                                                                                                                                                                                                                                                                                                                                                                                                                                                                                                                                   | 26  |
| GO:0051145 | smooth muscle cell differentiation                       | 9/901   | 45/17046   | 0.00049 | 0.01108 | 0.00871 | ADM/FGF10/NFATC3/NTF3/PITX2/BMP4/SOX9/ZEB1/TMEM204                                                                                                                                                                                                                                                                                                                                                                                                                                                                                                                                                                                                                                                                                                                                                                                                                                                                                                                                                                                                                                                                                                                                                                                                                                                                                                                                                                                                                                                                                                                                                                                                                                                                   | 9   |
| GO:0006468 | protein phosphorylation                                  | 118/901 | 1662/17046 | 0.0005  | 0.01115 | 0.00877 | AKT3/ABI1/CDKN1C/SPEG/BCKDK/HGST/NPFFR2/ADCY3/CHI3L1/ALPK2/CCR1/MAP3K8/IL131RA/TRPM6/CTGF/PPM1L/ADRB3/NLRP6/DRD4/EGFR/ADCK5/EPHA1/EPHA3/EPHB4/FGA/FGF10/RASA3/PPM1E/FOXO1/MORC3/MAPK8IP2/TSSK2/MTOR/GAK/RPS6KC1/FGF22/NPTN/BMP10/GPER1/DOK7/GSTP1/ANXA2/NRG1/HSP90AB1/IGF1/IGF2/CYR61/IL1RN/IL6/IL12RB2/INHBA/ISL1/ITGB2/KCNH2/KDR/HES5/LCK/LGALS9/SMAD3/MAP3K1/NRAS/NTF3/OPRL1/PARK2/ANGPT4/PIK3CG/PKHD1/PLA2G2A/PRKAG3/PML/RIPK4/TLR9/ELP3/PRKAR1B/PRKD1/MAPK3/MAP2K2/PSMB4/PAK6/PSMD7/MARK4/PXN/RASGRF2/TRIM27/CCL11/CCL17/NOD2/SFRP2/SGK1/BMP4/BMPR1B/SOX9/STK3/STK10/TNFAIP3/TNFRSF1A/TNXB/TWIST1/TNFRSF4/YWHAG/ZAP70/CXCR4/FZD5/CARD14/TTBK1/CDK10/RUNX3/IRS2/TNFRSF11A/STK19/SPHK1/MAP3K6/AURKB/ADIPOQ/H2AFY/RAPGEF2/ULK2/FGF19                                                                                                                                                                                                                                                                                                                                                                                                                                                                                                                                                                                                                                                                                                                                                                                                                                                                                                                                                                               | 118 |
| GO:0070374 | positive regulation of ERK1 and ERK2 cascade             | 19/901  | 154/17046  | 0.0005  | 0.01119 | 0.0088  | CHI3L1/CCR1/CTGF/EGFR/FGA/FGF10/GPER1/IL6/KDR/LGALS9/PLA2G2A/MAPK3/CCL11/CCL17/NOD2/BMP4/TNFRSF11A/RAPGEF2/FGF19                                                                                                                                                                                                                                                                                                                                                                                                                                                                                                                                                                                                                                                                                                                                                                                                                                                                                                                                                                                                                                                                                                                                                                                                                                                                                                                                                                                                                                                                                                                                                                                                     | 19  |
| GO:0060326 | cell chemotaxis                                          | 24/901  | 217/17046  | 0.00051 | 0.01135 | 0.00892 | CHGA/CCR1/EGR3/FFAR2/NR4A1/HRH1/IL6/IL16/ITGB2/LGALS9/NOV/LEF1/PIK3CG/TREM1/PARVA/PRKD1/PLEKHG5/CCL11/CCL17/NOD2/CCR2/CXCR4/CALR/TNFRSF11A                                                                                                                                                                                                                                                                                                                                                                                                                                                                                                                                                                                                                                                                                                                                                                                                                                                                                                                                                                                                                                                                                                                                                                                                                                                                                                                                                                                                                                                                                                                                                                           | 24  |
| GO:0048732 | gland development                                        | 38/901  | 408/17046  | 0.00051 | 0.01135 | 0.00892 | CDKN1C/CP51/EGFR/ESR1/FGA/FGF10/DKK3/NRG1/HLX/HOXB3/HOXD3/IGF1/IGF2/IL6/ISL1/ACAT1/SMAD3/NFATC3/LEF1/PITX2/PKM/PML/LIMS2/CCL11/STRA6/BMP4/SOX9/TGM2/TNFAIP3/PAX8/PPDPF/CAST/RUNX1/TP63/IRS2/FADD/TNFRSF11A/ALDH1A2                                                                                                                                                                                                                                                                                                                                                                                                                                                                                                                                                                                                                                                                                                                                                                                                                                                                                                                                                                                                                                                                                                                                                                                                                                                                                                                                                                                                                                                                                                   | 38  |
| GO:0070486 | leukocyte aggregation                                    | 38/901  | 408/17046  | 0.00051 | 0.01135 | 0.00892 | MAP3K8/CYLD/DDOST/EGR3/FLOT2/MTOR/HLA-DOA/HLA-DPA1/HLA-E/HLX/ZC3H12D/IGF1/IGF2/IL6/IRF1/ITGB2/LCK/LCP1/LGALS9/SMAD3/NFATC3/LEF1/PIK3CG/IL20RB/APBB1P/PAG1/NOD2/BMP4/STK10/ZEB1/CCR2/TNFRSF4/ZAP70/FZD5/SLA2/FADD/RSAD2/CD8A                                                                                                                                                                                                                                                                                                                                                                                                                                                                                                                                                                                                                                                                                                                                                                                                                                                                                                                                                                                                                                                                                                                                                                                                                                                                                                                                                                                                                                                                                          | 38  |
| GO:1902533 | positive regulation of intracellular signal transduction | 72/901  | 921/17046  | 0.00053 | 0.01178 | 0.00927 | CDH13/HGST/CHI3L1/CCR1/MAP3K8/IL131RA/MIB2/CTGF/ADRB3/DRD4/EGFR/FGA/FGF10/RASA3/AKR1B1/PUM2/MAPK8IP2/MTOR/FGF22/GNAS/GPER1/NRG1/IGF1/IGF2/IL1RN/IL6/ISL1/KDR/HES5/LCK/LGALS9/LHCGR/MAP3K1/NRAS/NTF3/PARK2/PIK3CG/PLA2G2A/TLR9/ZDHHC13/PRKD1/MAPK3/MAP2K2/PSMB4/PSMD7/PLEKHG5/PXN/RASGRF2/S100A4/CCL11/CCL17/NOD2/BMP4/SOX9/STK3/BST2/TNFRSF1A/TRAFA5/ZAP70/CXCR4/FZD5/CARD14/CDK10/IRS2/FADD/TNFRSF11A/SPHK1/MAP3K6/CD8A/ADIPOQ/RAPGEF2/FGF19                                                                                                                                                                                                                                                                                                                                                                                                                                                                                                                                                                                                                                                                                                                                                                                                                                                                                                                                                                                                                                                                                                                                                                                                                                                                        | 72  |
| GO:0002040 | sprouting angiogenesis                                   | 10/901  | 55/17046   | 0.00054 | 0.0119  | 0.00935 | CDH13/ESM1/EGR3/EPHB4/FOXK2/NR4A1/KDR/LEF1/PARVA/BMP4                                                                                                                                                                                                                                                                                                                                                                                                                                                                                                                                                                                                                                                                                                                                                                                                                                                                                                                                                                                                                                                                                                                                                                                                                                                                                                                                                                                                                                                                                                                                                                                                                                                                | 10  |
| GO:0021781 | glial cell fate commitment                               | 5/901   | 14/17046   | 0.00055 | 0.01199 | 0.00943 | SOX8/NRG1/HES5/NTF3/SOX9                                                                                                                                                                                                                                                                                                                                                                                                                                                                                                                                                                                                                                                                                                                                                                                                                                                                                                                                                                                                                                                                                                                                                                                                                                                                                                                                                                                                                                                                                                                                                                                                                                                                                             | 5   |
| GO:0044262 | cellular carbohydrate metabolic process                  | 28/901  | 271/17046  | 0.00055 | 0.01207 | 0.00949 | GNE/SLC51B/CP51/FOXO1/AKR1B1/MTOR/GAPDH/GPER1/GRB10/HAS1/HK1/HRH1/IGF1/IGF2/IL6/LHCGR/PARK2/SIRT6/PGAM2/PRKAG3/POMC/PPP1CB/PPP1CC/CSGALNACT1/PHLDA2/IRS2/STBD1/ADIPOQ                                                                                                                                                                                                                                                                                                                                                                                                                                                                                                                                                                                                                                                                                                                                                                                                                                                                                                                                                                                                                                                                                                                                                                                                                                                                                                                                                                                                                                                                                                                                                | 28  |

|            |                                                      |         |            |         |         |         |                                                                                                                                                                                                                                                                                                                                                                                                                                                                                                                                                                                                                                                                                                       |     |
|------------|------------------------------------------------------|---------|------------|---------|---------|---------|-------------------------------------------------------------------------------------------------------------------------------------------------------------------------------------------------------------------------------------------------------------------------------------------------------------------------------------------------------------------------------------------------------------------------------------------------------------------------------------------------------------------------------------------------------------------------------------------------------------------------------------------------------------------------------------------------------|-----|
| GO:0019693 | ribose phosphate metabolic process                   | 43/901  | 482/17046  | 0.00056 | 0.0122  | 0.00959 | TCIRG1/NPFFR2/ADCY3/ACOT7/ADM/ADRB3/DLG2/DRD4/ENO2/GABBR1/GAPDHS/AMPD2/PDE7B/AMPD3/GNAS/GPER1/DNAJC15/GUCY1A3/NME7/HK1/ACACB/HPCA/NME9/IGF1/LHCGR/MC2R/MYH4/NDUF84/ATP1A2/NPPC/OPRL1/ATP5B/PALM/PDE4C/PDE7A/SIRT6/PDE6B/PGAM2/PKM/MRAP/SCT/CCR2/UPP1                                                                                                                                                                                                                                                                                                                                                                                                                                                  | 43  |
| GO:0045595 | regulation of cell differentiation                   | 99/901  | 1356/17046 | 0.00058 | 0.01248 | 0.00982 | TBR1/CCR1/SEZ6/ADM/FAM101A/CTGF/SMYD1/CYLD/BHLHA15/DMBT1/EGR3/EIF4G1/UNC13D/EPHA3/FGA/FGF10/ACIN1/FOXC2/FOXO1/SPG20/FLOT2/NEDD4L/MTOR/TENM4/NPTN/BMP10/GNAS/GPER1/SOX8/NRG1/HLA-B/HLA-DOA/HLX/HOXB3/HOXD3/ID3/BARHL2/IGF1/CYR61/IL6/INHBA/IRF1/ISL1/JUP/KDR/HES5/LCK/ARHGDI2/LGALS9/SMAD3/MFI2/MITF/NEU1/NOV/NPPC/NTF3/PALM/PARK2/LEF1/ATP8A2/PLA2G2A/PML/SSH1/PRKD1/MAP2K2/BGLAP/CCL17/SFRP2/BMP4/BMPR1B/SOX9/STK3/SUPT6H/ZEB1/TEAD3/TNFRSF1A/TWIST1/WNT10B/YWHAG/ZAP70/PAX8/CXCR4/ZC3H12A/CALR/SCRT1/HOPX/IFITM1/SCIN/RUNX1/TP63/RUNX3/FADD/LIMD1/PIAS2/CBFA2T2/ADIPOQ/H2AFY/RAPGEF2/ULK2                                                                                                           | 99  |
| GO:0031076 | embryonic camera-type eye development                | 8/901   | 37/17046   | 0.00058 | 0.01251 | 0.00984 | FGF10/PITX2/STRA6/ZEB1/TWIST1/FZD5/KDM2B/ALDH1A2                                                                                                                                                                                                                                                                                                                                                                                                                                                                                                                                                                                                                                                      | 8   |
| GO:0002407 | dendritic cell chemotaxis                            | 6/901   | 21/17046   | 0.00059 | 0.01259 | 0.0099  | CCR1/LGALS9/PIK3CG/CCR2/CXCR4/CALR                                                                                                                                                                                                                                                                                                                                                                                                                                                                                                                                                                                                                                                                    | 6   |
| GO:0006109 | regulation of carbohydrate metabolic process         | 19/901  | 156/17046  | 0.00059 | 0.01259 | 0.0099  | SLC51B/FOXO1/MTOR/GAPDHS/GPER1/GRB10/HRH1/IGF1/IGF2/IL6/LHCGR/PARK2/SIRT6/PGAM2/POMC/PPP1CB/PHLDA2/IRS2/ADIPOQ                                                                                                                                                                                                                                                                                                                                                                                                                                                                                                                                                                                        | 19  |
| GO:2000147 | positive regulation of cell motility                 | 33/901  | 341/17046  | 0.0006  | 0.0129  | 0.01015 | CDH13/CCR1/EGFR/EPHA1/FGF10/FOXC2/GPER1/IGF1/CYR61/IL6/KDR/LGALS9/SMAD3/NTF3/P2RY6/LEF1/ANGPT4/ELP3/PRKD1/MAP2K2/CCL11/BMP4/SLC8A1/SOX9/TWIST1/CCR2/PTP4A1/COL18A1/CALR/IRS2/FADD/SPHK1/RAPGEF2                                                                                                                                                                                                                                                                                                                                                                                                                                                                                                       | 33  |
| GO:0007274 | neuromuscular synaptic transmission                  | 7/901   | 29/17046   | 0.00063 | 0.01343 | 0.01056 | CHRNA1/CHRNA2/CHRNA5/DTNA/EGR3/NTF3/CHRNA9                                                                                                                                                                                                                                                                                                                                                                                                                                                                                                                                                                                                                                                            | 7   |
| GO:0030802 | regulation of cyclic nucleotide biosynthetic process | 17/901  | 133/17046  | 0.00065 | 0.01365 | 0.01074 | NPFFR2/ADM/ADRB3/DRD4/GABBR1/GNAS/GPER1/GUCY1A3/HPCA/LHCGR/MC2R/NPPC/OPRL1/PALM/MRAP/SCT/CCR2                                                                                                                                                                                                                                                                                                                                                                                                                                                                                                                                                                                                         | 17  |
| GO:0051093 | negative regulation of developmental process         | 58/901  | 710/17046  | 0.00065 | 0.01365 | 0.01074 | CDH3/LECT1/CCR1/SEZ6/FAM101A/CYLD/ADRB3/BHLHA15/FGF10/VASH1/FOXC2/FOXO1/SPG20/GNAS/GPER1/SOX8/HLX/ID3/RSPO2/IGF1/IL6/INHBA/IRF1/ISL1/HES5/ARHGDI2/SMAD3/MFI2/NOV/NPPC/NRAS/PARK2/LEF1/CEND1/ANGPT4/PML/LIMS2/IFT122/CCL17/SFRP2/BMP4/SLIT1/SOX9/STK3/ZEB1/TWIST1/CCR2/WNT10B/PAX8/CALR/HOPX/RUNX1/TP63/LIMD1/CBFA2T2/ADIPOQ/RAPGEF2/ULK2                                                                                                                                                                                                                                                                                                                                                              | 58  |
| GO:0070838 | divalent metal ion transport                         | 37/901  | 399/17046  | 0.00065 | 0.01375 | 0.01081 | TRDN/CLCA1/CCR1/C15orf27/TRPM6/CTGF/TRPV3/BHLHA15/DRD4/RASA3/CRACR2B/GPER1/ANXA6/LCK/ATP1A2/NFATC3/OPRL1/PIK3CG/PML/TLR9/ZDHHC13/TRPV6/SLC30A10/CHRNA9/PRKD1/TRPV5/TRPC7/TRIM27/BMP4/SLC8A1/TRPC4/TRPC6/TRPM2/CACNA1E/CACNB2/CASQ1/SMDT1                                                                                                                                                                                                                                                                                                                                                                                                                                                              | 37  |
| GO:0010628 | positive regulation of gene expression               | 114/901 | 1608/17046 | 0.00066 | 0.01375 | 0.01081 | CDH3/CDH13/CDKN1C/DMRT2/TBR1/ERLIN2/PSIP1/IL31RA/CTGF/CITED4/BHLHA15/EEF2/EGFR/ESR1/FGF10/SBNO2/FOXC2/FOXO1/LARP1/VGLL2/MTOR/PABPC1/DNAJC2/BMP10/GPER1/BRF1/SOX8/HMG2A/NR4A1/HOXD3/TFAP2E/BARHL2/IGF1/IGF2/CYR61/IL6/FOXK2/INHBA/IRF1/ISL1/JUP/HES5/LCK/LGALS9/LMNA/LMO2/SMAD3/MEF2D/MEOX1/MEOX2/MFI2/MITF/NFATC3/NFYB/NHLH2/NTF3/PARK2/LEF1/PRR16/PITX2/PLAGL1/RIPK4/TLR9/CYTL1/POMC/BANP/PIWIL2/PRKD1/MAPK3/ARNTL2/RGMA/PTGFR/ACTA2/TRIM27/NPAS3/NOD2/SFRP2/TRA2B/BMP4/ZNF649/BMPR1B/SOX9/STK3/SUPT6H/TBP/TCEA1/TCEB2/ZEB1/ACTC1/TEAD3/TNFRSF1A/TRAFF1/TRAFF5/TWIST1/WNT10B/PAX8/FZD5/CARD14/ZC3H12A/CALR/NROB2/RUNX1/TP63/RUNX3/FADD/TNFRSF11A/ALDH1A2/SPHK1/PIAS2/LDB2/CBFA2T2/H2AFY/MICAL2/NR1H4 | 114 |
| GO:0030097 | hemopoiesis                                          | 56/901  | 680/17046  | 0.00066 | 0.01375 | 0.01081 | ABI1/CDKN1C/CCR1/IL31RA/CYLD/ESCO2/EEF2/EFNA2/EGR3/EML1/SBNO2/ACIN1/MTOR/GNAS/FLVCR1/ANXA2/HLA-B/HLA-DOA/HLX/HOXB3/IL6/INHBA/IRF1/KDR/HES5/LCK/LGALS9/LMO2/MEOX1/MITF/NFATC3/LEF1/PML/HERC6/SMPD3/BGLAP/SFRP2/VPS33A/BMP4/STK3/TCEA1/ZEB1/WNT10B/ZAP70/FZD5/C6orf25/SCIN/RUNX1/RUNX3/ACTN1/FADD/TNFRSF11A/RSAD2/CD8A/ADIPOQ/CD79A                                                                                                                                                                                                                                                                                                                                                                     | 56  |
| GO:0009165 | nucleotide biosynthetic process                      | 31/901  | 315/17046  | 0.00066 | 0.01375 | 0.01081 | TCIRG1/NPFFR2/ADCY3/ACOT7/ADM/ADRB3/DRD4/GABBR1/AMPD2/AMPD3/GNAS/GPER1/GUCY1A3/NME7/ACACB/HPCA/NME9/LHCGR/MC2R/ME1/NPPC/OAS2/OPRL1/ATP5B/PALM/PKM/MRAP/SCT/CCR2/UPP1/KMO                                                                                                                                                                                                                                                                                                                                                                                                                                                                                                                              | 31  |
| GO:0030003 | cellular cation homeostasis                          | 43/901  | 486/17046  | 0.00066 | 0.01375 | 0.01081 | TCIRG1/TRDN/CLN5/CCR1/ADM/DRD4/ESR1/NEDD4L/NPTN/GPER1/FLVCR1/ANXA6/LCK/NUBP1/ATP1A2/OPRL1/ATP5B/PDE6B/PIK3CG/PKHD1/PML/SLC30A10/CHRNA9/PRKD1/SLAMF8/TRPC7/CCL11/SGK1/BMP4/SLC4A1/SLC8A1/TGM2/TRPC4/TRPC6/CCR2/CA7/CXCR4/RAB7A/CALR/ATP13A4/CASQ1/SMDT1/MTL5                                                                                                                                                                                                                                                                                                                                                                                                                                           | 43  |

|            |                                                             |         |            |         |         |         |                                                                                                                                                                                                                                                                                                                                                                                                                                                                                                                                                                                                                                                                                                                                                                                                                                                                                                                                                                                                                                                                                                                                                                                                                                                                                                                                                                                                                                                                                                                                                                                                                                                                                                                                                                                                                                                                                                                                                                                                                                                                                                                                                                                                                                                                                                                                                                                                                                                                                                                                                                                                                                                                                                                                                                                                                                                  |     |
|------------|-------------------------------------------------------------|---------|------------|---------|---------|---------|--------------------------------------------------------------------------------------------------------------------------------------------------------------------------------------------------------------------------------------------------------------------------------------------------------------------------------------------------------------------------------------------------------------------------------------------------------------------------------------------------------------------------------------------------------------------------------------------------------------------------------------------------------------------------------------------------------------------------------------------------------------------------------------------------------------------------------------------------------------------------------------------------------------------------------------------------------------------------------------------------------------------------------------------------------------------------------------------------------------------------------------------------------------------------------------------------------------------------------------------------------------------------------------------------------------------------------------------------------------------------------------------------------------------------------------------------------------------------------------------------------------------------------------------------------------------------------------------------------------------------------------------------------------------------------------------------------------------------------------------------------------------------------------------------------------------------------------------------------------------------------------------------------------------------------------------------------------------------------------------------------------------------------------------------------------------------------------------------------------------------------------------------------------------------------------------------------------------------------------------------------------------------------------------------------------------------------------------------------------------------------------------------------------------------------------------------------------------------------------------------------------------------------------------------------------------------------------------------------------------------------------------------------------------------------------------------------------------------------------------------------------------------------------------------------------------------------------------------|-----|
| GO:0006357 | regulation of transcription from RNA polymerase II promoter | 118/901 | 1675/17046 | 0.00066 | 0.01375 | 0.01081 | ZNF783/CDH13/CDKN1C/ZBTB18/DMRT2/TBR1/ERLIN2/PSIP1/EGLN2/RNF168/ZNF366/BHLHA15/DNMT3A/EGFR/ELK4/ESR1/FGF10/SBNO2/TRAK1/FOXL1/FOX2/FOXO1/SPG20/NEDD4L/RYPB/VGLL2/BMP10/GPER1/SOX8/HMGA1/NR4A1/HOXB3/HOXC5/HOXC6/TFAP2E/ID3/BARHL2/IGF1/IGF2/CYR61/IL6/FOXK2/INHBA/IRF1/ISL1/HES5/LMNA/LMO2/SMA D3/MEF2D/MEOX1/MEOX2/MITF/NFATC3/NHLH2/NTF3/PARK2/LEF1/PIITX2/PLAGL1/RIPPLY3/TLR9/CYTL1/POMC/MED18/ELP3/PRMT6/DNAJC17/PRKD1/MAPK3/HTRA1/ARNTL2/RGMA/TENM2/GATAD2B/TRIM27/NPAS3/NOD2/SFRP2/GZF1/BMP4/ZNF649/BMPR1B/ZSCAN18/SOX9/STAT2/SUPT6H/TCEA1/TCEB2/ZEB1/TEAD3/TNFRSF1A/TWIST1/UCP1/WNT 10B/ZNF177/PAX8/FZD5/CALR/SCRT1/SLA2/NROB2/HOPX/KDM2B/CBX2/RUNX1/TP63/RUNX3/FADD/BUD31/CCNA1/PIAS2/LDB2/CBFA2T2/AURKB/H2AFY/MICAL2/NR1H4                                                                                                                                                                                                                                                                                                                                                                                                                                                                                                                                                                                                                                                                                                                                                                                                                                                                                                                                                                                                                                                                                                                                                                                                                                                                                                                                                                                                                                                                                                                                                                                                                                                                                                                                                                                                                                                                                                                                                                                                                                                                                                               | 118 |
| GO:0040017 | positive regulation of locomotion                           | 34/901  | 357/17046  | 0.00067 | 0.01379 | 0.01084 | CDH13/CCR1/EGFR/EPHA1/FGF10/FOX2/GPER1/IGF1/CYR61/IL6/IL16/KDR/LGALS9/SMAD3/NTF3/P2RY6/LEF1/ANGPT4/ELP3/PRKD1/MAP2K2/CCL11/BMP4/SLC8A1/SOX9/TWIS T1/CCR2/PTP4A1/COL18A1/CALR/IRS2/FADD/SPHK1/RAPGEF2                                                                                                                                                                                                                                                                                                                                                                                                                                                                                                                                                                                                                                                                                                                                                                                                                                                                                                                                                                                                                                                                                                                                                                                                                                                                                                                                                                                                                                                                                                                                                                                                                                                                                                                                                                                                                                                                                                                                                                                                                                                                                                                                                                                                                                                                                                                                                                                                                                                                                                                                                                                                                                             | 34  |
| GO:0044238 | primary metabolic process                                   | 540/901 | 9328/17046 | 0.00067 | 0.01379 | 0.01084 | AKT3/ABI1/GNE/ZNF783/TSPAN5/CDH13/SUGP2/MBNL2/FARP1/CDKN1C/SPEG/BCKDK/TCIRG1/C1D/ZBTB18/PITRM1/MTFHS/PDPN/DMRT2/CEL1/CEL2/TBR1/HCST/NPFFR2/A DCY3/PNRC1/TMED10/SLC27A2/LECT1/ADAM29/HNRNPUL1/RPP14/HIBADH/CHI3L1/ERLIN2/PSIP1/CHI3L2/EGLN2/B4GALT7/ACOT7/EXOC3/ADPRHL1/CARD16/ZBED9/CIDEA/ALP K2/GALNT15/CLCA1/CLN5/MRPL52/CCR1/SLC51B/CNP/APOA1BP/NEU4/COL11A1/GALM/MAP3K8/ZFP42/ADM/IL31RA/EGFLAM/UBLC1P1/HUS1B/CPD/CPM/CPS1/PXDNL/CRABP1 /ZNF358/TRPM6/MIB2/PARP4/LDLRAD3/B3GLCT/MGAT5B/CSTA/ZNF738/CTGF/SMYD1/PMP11/SH3D19/CYLD/MBOAT1/ADRB3/ESCO2/CYP11A1/ZNF782/FITM1/ADAL/ZNF709/Z NF781/CITED4/DBB1/LONRF2/DDOST/RNF168/ZNF366/BHLHA15/NLRP6/DLG2/DNMT3A/ABAT/DPH1/DRD4/ECE1/AGXT/EEF2/EGFR/EGR3/PATL2/EIF4G1/A2M/ELK4/LIPH/ENO2/ ADC5/EPHA1/EPHA3/EPH4/ESR1/ALAS1/F11/FAH/PRSS54/RNF182/SP8/FGA/FGF10/FHIT/XRN2/RASA3/PPM1E/SBNO2/TRAK1/MRSB2/ACIN1/FOX1/FOX2/FOXO1/AKR1B1/G GA3/FLOT2/NUP210/NEDD4L/LARP1/PUM2/RYPB/MORC3/MAPK8IP2/TSSK2/VGLL2/MTOR/FUCA1/SLC37A4/GABBR1/RNF144B/ZNF549/ST6GALNAC3/GAK/SAMM50/PNKD/TEN M4/ACOT11/LTN1/FBXL21/FBXO2/LCE2B/SACS/GATM/GBGT1/GAPDH5/SLC17A5/RPS6KC1/PABPC1/DNAJC2/FGF22/NPTN/AMPD2/PDE7B/DKK3/SLC2/VPS4A/AMPD3/DHHD/BM P10/ZNF638/GNAS/ZNF311/TMPRSS12/PIGW/ZNF844/THEM5/GPER1/EOGT/DOK7/GRB10/MRPS18B/ZBTB44/DNAJC15/GSTP1/GTF2B/BRF1/GUCY1A3/NME7/PADI1/GZMA/ANX A2/HAS1/SERPIND1/SOX8/NRG1/HK1/HLX/HMGA1/NR4A1/ACACB/HPCA/HOXB3/HOXC4/HOXC5/HOXC6/HOXD3/HRH1/HSD11B1/HSD17B2/ACADL/HSPA11/HSP90AA1/HSP90AB 1/DUPD1/ADAMTSL5/TFAP2E/ID3/ZC3H12D/COL28A1/BARHL2/NME9/IGF1/IGF2/CYR61/LCE1C/LCE1D/LCE2D/IL1RN/IL6/IL12RB2/PRSS41/IL16/FOXK2/INHBA/INPP5A/IRF1/ISL1/I TGB2/ITIH3/ITIH4/IVL/JUP/USP50/HILS1/KCNH2/KDR/ACAT1/HES5/AFF3/LC1/MUC21/LDLR/LGALS9/LSCGALNACT1/PRKD1/WSB2/MYNN/APOBR/MAPK3/MAP2K2/PROC/MRAP/PRMT8/ MASP1/HTRA1/PSMB4/PAK6/ARNTL2/RGMA/PRDM11/PSMD7/TENM2/GATAD2B/KLHL8/RDH14/METT14/MARK4/CCAR2/PTPRE/PXN/CREBZF/RASGRF2/RFC2/TRIM27/RGR/RGS 12/EXOC4/RPA3/RPL8/RPL29/SCT/CCL11/CCL17/ABHD4/MRPS14/PRSS22/NPAS3/NOD2/STRA6/SFRP2/TRA2B/GZF1/SGK1/CERK/BMP4/ZNF649/BMPR1B/BRD9/ZSCAN18/BOK/SO X9/SRP68/STAT2/STK3/STK10/SUPT6H/BST2/VAMP2/TAF4B/TBP/TCEA1/TCEB2/ZEB1/TEAD3/TERF1/TGM2/TIMP3/TLE3/TNFAIP3/TNFRSF1A/TNXB/TRA7/TRA7F5/PHLDA2/TWIST1 /CCR2/TNFRSF4/UCP1/UPPP1/VARS/WNT10B/YWHAG/ZAP70/ZNF7/ZNF124/ZNF177/PTP4A1/MOGS/PAX8/CXCR4/FZD5/RAB7A/ER13/CARD14/GDPP3/CCS4/ZNF665/EPH3/ZC3H 14/ERMP1/ZNF606/ZC3H12A/FAAP100/CPEB4/ZNF436/EEDP1/CALR/QTRT1/SLIRP/CAST/SCRT1/HIST1H3A/SLA2/ZNF397/NROB2/HOPX/TTBK1/SPINK7/TRIM63/KDM2B/LOXL3/GT PBP3/CBX2/RAE1/GAS7/CDK10/KMO/RUNX1/TP63/RUNX3/SERPINA6/IRS2/ACTN1/CRADD/FADD/TNFRSF11A/ALDH1A2/STK19/SYNJ2/SPHK1/BUD31/CCNA1/ENDOU/STBD1/LIM D1/CH25H/ERI1/PIAS2/ZFAND2A/MAP3K6/LDB2/CBFA2T2/AURKB/NEURL3/SDR42E1/ADIPOQ/RAB3D/H2AFY/ENTPD3/PREPL/MICAL2/N4BP1/VGLL4/NUP93/RAPGEF2/ULK2/ZBT B39/LPGAT1/FGF19/NR1H4 | 540 |
| GO:0001934 | positive regulation of protein phosphorylation              | 71/901  | 913/17046  | 0.00067 | 0.01379 | 0.01084 | ABI1/ADCY3/CHI3L1/CCR1/MAP3K8/IL31RA/CTGF/ADRB3/DRD4/EGFR/FGA/FGF10/RASA3/MAPK8IP2/MTOR/FGF22/NPTN/BMP10/GPER1/DOK7/ANXA2/NRG1/HSP90AB1/IGF1/I GF2/CYR61/IL1RN/IL6/INHBA/ISL1/KDR/HES5/LCK/LGALS9/MAP3K1/NRAS/NTF3/OPRL1/ANGPT4/PIK3CG/PLA2G2A/TLR9/PRKAR1B/PRKD1/MAPK3/MAP2K2/PSMB4/PAK6/PSMD 7/PXN/RASGRF2/CCL11/CCL17/NOD2/SFRP2/BMP4/SOX9/STK3/STK10/TNFRSF1A/CXCR4/FZD5/CARD14/CDK10/IRS2/TNFRSF11A/SPHK1/MAP3K6/ADIPOQ/RAPGEF2/FGF19                                                                                                                                                                                                                                                                                                                                                                                                                                                                                                                                                                                                                                                                                                                                                                                                                                                                                                                                                                                                                                                                                                                                                                                                                                                                                                                                                                                                                                                                                                                                                                                                                                                                                                                                                                                                                                                                                                                                                                                                                                                                                                                                                                                                                                                                                                                                                                                                       | 71  |
| GO:0051049 | regulation of transport                                     | 115/901 | 1626/17046 | 0.00068 | 0.01379 | 0.01084 | CDH3/CDH13/TRDN/CHGA/CIDEA/CCR1/SLC51B/CYLD/TRPV3/NLRP6/ABAT/DRD4/EGFR/UNC13D/FGA/FGF10/EXPH5/MLC1/NUP210/NEDD4L/MAPK8IP2/MTOR/GLS2/VPS4A/GN AS/CRACR2B/GPR26/GPER1/FFAR2/GRB10/ANXA2/KCNIP2/NRG1/ANXA13/HLA- E/HPCA/HSPA11/HSP90AB1/IGF1/IL1RN/IL6/INHBA/ISL1/JUP/KCNH2/KCNJ8/KCNJ9/IPO5/LCP1/LGALS9/LLGL1/SMAD3/ATP1A2/NFATC3/NOV/NTF3/OPRL1/PARK2/PDE4C/SIRT6/A TP8A2/PIK3CG/PML/FXYD6/TLR9/POMC/PON1/GOLPH3L/TRPV6/SMPD3/SYBU/PRKAR1B/LMBRD1/PRKD1/MAPK3/MAP2K2/RASGRF2/TRIM27/SCT/NOD2/SFRP2/SGK1/BMP4/SLC 8A1/SLC9A3/SUPT6H/BST2/VAMP2/TRPC6/TWIST1/CCR2/TNFRSF4/YWHAG/CA7/CACNA1E/CACNB2/PAX8/FZD5/RAB7A/RAB11FIP1/CALR/NROB2/CASQ1/RAE1/SCIN/IRS2/TNFRS F11A/SPHK1/SYT7/RSAD2/REEP6/ADIPOQ/RAB3D/NUP93/FGF19                                                                                                                                                                                                                                                                                                                                                                                                                                                                                                                                                                                                                                                                                                                                                                                                                                                                                                                                                                                                                                                                                                                                                                                                                                                                                                                                                                                                                                                                                                                                                                                                                                                                                                                                                                                                                                                                                                                                                                                                                                                                                                                             | 115 |
| GO:0046903 | secretion                                                   | 77/901  | 1008/17046 | 0.00068 | 0.01379 | 0.01084 | ADCY3/TMED10/CHGA/CHI3L1/EXOC3/CIDEA/CCR1/ADM/CTGF/NLRP6/ABAT/DRD4/AGXT/A2M/UNC13D/FGA/FGF10/EXPH5/STEAP2/GLS2/VPS4A/GNAS/GPER1/FFAR2/SCG3/AN XA2/NRG1/HLA- E/IGF1/IGF2/IL1RN/IL6/AQP5/INHBA/AQP9/ISL1/LGALS9/LLGL1/NOV/OPRL1/PARK2/PDE4C/PIK3CG/PML/TLR9/TREM1/POMC/GOLPH3L/TRPV6/SMPD3/SYBU/PRKAR1B/TRIM27/ EXOC4/SCT/NOD2/SGK1/VPS33A/SLC6A12/VAMP2/TWIST1/CCR2/TNFRSF4/CACNA1E/PAX8/RAB7A/RAB11FIP1/NROB2/MON1A/SCIN/IRS2/ACTN1/TNFRSF11A/SYT7/RSAD2/ADIP OQ/RAB3D                                                                                                                                                                                                                                                                                                                                                                                                                                                                                                                                                                                                                                                                                                                                                                                                                                                                                                                                                                                                                                                                                                                                                                                                                                                                                                                                                                                                                                                                                                                                                                                                                                                                                                                                                                                                                                                                                                                                                                                                                                                                                                                                                                                                                                                                                                                                                                           | 77  |
| GO:0042110 | T cell activation                                           | 37/901  | 400/17046  | 0.00069 | 0.01382 | 0.01087 | MAP3K8/CYLD/DDOST/EGR3/FLOT2/MTOR/HLA-DOA/HLA-DPA1/HLA- E/HLX/ZC3H12D/IGF1/IGF2/IL6/IRF1/ITGB2/LCK/LCP1/LGALS9/SMAD3/NFATC3/LEF1/PIK3CG/IL20RB/APBB1P/PAG1/NOD2/BMP4/ZEB1/CCR2/TNFRSF4/ZAP70/FZD5/SLA2/FADD/ RSAD2/CD8A                                                                                                                                                                                                                                                                                                                                                                                                                                                                                                                                                                                                                                                                                                                                                                                                                                                                                                                                                                                                                                                                                                                                                                                                                                                                                                                                                                                                                                                                                                                                                                                                                                                                                                                                                                                                                                                                                                                                                                                                                                                                                                                                                                                                                                                                                                                                                                                                                                                                                                                                                                                                                          | 37  |

|            |                                                    |         |            |         |         |         |                                                                                                                                                                                                                                                                                                                                                                                                                                                                                                                                                                                                                                        |     |
|------------|----------------------------------------------------|---------|------------|---------|---------|---------|----------------------------------------------------------------------------------------------------------------------------------------------------------------------------------------------------------------------------------------------------------------------------------------------------------------------------------------------------------------------------------------------------------------------------------------------------------------------------------------------------------------------------------------------------------------------------------------------------------------------------------------|-----|
| GO:0070489 | T cell aggregation                                 | 37/901  | 400/17046  | 0.00069 | 0.01382 | 0.01087 | MAP3K8/CYLD/DDOST/EGR3/FLOT2/MTOR/HLA-DOA/HLA-DPA1/HLA-E/HLX/ZC3H12D/IGF1/IGF2/IL6/IRF1/ITGB2/LCK/LCP1/LGALS9/SMAD3/NFATC3/LEF1/PIK3CG/IL20RB/APBB1P/PAG1/NOD2/BMP4/ZEB1/CCR2/TNFRSF4/ZAP70/FZD5/SLA2/FADD/RSAD2/CD8A                                                                                                                                                                                                                                                                                                                                                                                                                  | 37  |
| GO:0071320 | cellular response to cAMP                          | 9/901   | 47/17046   | 0.00069 | 0.01382 | 0.01087 | CPS1/CYP11A1/EGR3/AQP9/PIK3CG/SLC8A1/WNT10B/ADIPOQ/RAPGEF2                                                                                                                                                                                                                                                                                                                                                                                                                                                                                                                                                                             | 9   |
| GO:0018108 | peptidyl-tyrosine phosphorylation                  | 31/901  | 316/17046  | 0.0007  | 0.01397 | 0.01098 | ABI1/IL31RA/EGFR/EPHA1/EPHA3/EPH4/FGF10/MTOR/NPTN/DOK7/NRG1/IGF1/IGF2/IL6/IL12RB2/ISL1/ITGB2/KDR/HES5/LCK/NTF3/ANGPT4/MAPK3/MAP2K2/PXN/TRIM27/NO D2/SFRP2/TNFRSF1A/ZAP70/ADIPOQ                                                                                                                                                                                                                                                                                                                                                                                                                                                        | 31  |
| GO:0071396 | cellular response to lipid                         | 35/901  | 372/17046  | 0.0007  | 0.01398 | 0.011   | SPON2/ADCY3/CPS1/CYP11A1/EGFR/EPHA3/ESR1/SBNO2/MCL1/GNAS/GPER1/FFAR2/GSTP1/NR4A1/IL6/INHBA/ISL1/ATP1A2/P2RY6/LEF1/MAPK3/PTGFR/BGLAP/BMP4/SOX9/TL R5/TNFAIP3/WNT10B/ZC3H12A/NROB2/TRIM63/MGARP/ALDH1A2/LY86/NR1H4                                                                                                                                                                                                                                                                                                                                                                                                                       | 35  |
| GO:0002695 | negative regulation of leukocyte activation        | 17/901  | 134/17046  | 0.0007  | 0.01399 | 0.01101 | IL31RA/CYLD/GPER1/HLX/ZC3H12D/INHBA/IRF1/LGALS9/IL20RB/PAG1/BMP4/BPI/TNFAIP3/CCR2/LST1/ZC3H12A/SLA2                                                                                                                                                                                                                                                                                                                                                                                                                                                                                                                                    | 17  |
| GO:0042327 | positive regulation of phosphorylation             | 73/901  | 946/17046  | 0.0007  | 0.01399 | 0.01101 | ABI1/ADCY3/CHI3L1/CCR1/MAP3K8/IL31RA/CTGF/ADRB3/DRD4/EGFR/FGA/FGF10/RASA3/MAPK8IP2/MTOR/GAPDHS/FGF22/NPTN/BMP10/GPER1/DOK7/GRB10/ANXA2/NRG1/HSP90AB1/IGF1/IGF2/CYR61/IL1RN/IL6/INHBA/ISL1/KDR/HES5/LCK/LGALS9/MAP3K1/NRAS/NTF3/OPRL1/ANGPT4/PIK3CG/PLA2G2A/TLR9/PRKAR1B/PRKD1/MAPK3/MAP2K2/PS MB4/PAK6/PSMD7/PXN/RASGRF2/CCL11/CCL17/NOD2/SFRP2/BMP4/SOX9/STK3/STK10/TNFRSF1A/CXCR4/FZD5/CARD14/CDK10/IRS2/TNFRSF11A/SPHK1/MAP3K6/ADIPOQ/RAP GEF2/FGF19                                                                                                                                                                                | 73  |
| GO:0014033 | neural crest cell differentiation                  | 10/901  | 57/17046   | 0.00073 | 0.01436 | 0.01129 | FOXC2/SOX8/NRG1/ISL1/LEF1/PITX2/SOX9/TWIST1/ALDH1A2/FGF19                                                                                                                                                                                                                                                                                                                                                                                                                                                                                                                                                                              | 10  |
| GO:0050865 | regulation of cell activation                      | 39/901  | 430/17046  | 0.00073 | 0.01436 | 0.01129 | MAP3K8/IL31RA/CTGF/CYLD/EGR3/UNC13D/FGF10/FLOT2/MTOR/GPER1/HLA-DOA/HLA-DPA1/HLA-E/HLX/ZC3H12D/IGF1/IGF2/IL6/INHBA/IRF1/LCK/LGALS9/IL20RB/PAG1/PTPRE/NOD2/BMP4/BPI/SUPT6H/ZEB1/TNFAIP3/CCR2/TNFRSF4/ZAP70/LST1/ZC3H12A/SLA2/IRS2/FADD                                                                                                                                                                                                                                                                                                                                                                                                   | 39  |
| GO:0050777 | negative regulation of immune response             | 15/901  | 111/17046  | 0.00073 | 0.01445 | 0.01136 | NLRP6/A2M/HLA-B/HLA-E/HLX/LGALS9/IL20RB/MASP1/PSMB4/TRIM27/NOD2/BST2/TNFAIP3/CCR2/NLRX1                                                                                                                                                                                                                                                                                                                                                                                                                                                                                                                                                | 15  |
| GO:2000026 | regulation of multicellular organismal development | 105/901 | 1465/17046 | 0.00075 | 0.01464 | 0.01151 | CDH3/DMRT2/TBR1/LECT1/CHI3L1/CCR1/SEZ6/ADM/FAM101A/CTGF/CYLD/DMBT1/EGR3/EIF4G1/EPHA1/EPHA3/ESR1/FGF10/VASH1/ACIN1/FOXC2/SPG20/NEDD4L/MTOR/TEN M4/NPTN/BMP10/GNAS/GPER1/SOX8/NRG1/HLA-B/HLA-DOA/HLX/ACACB/HOXB3/HOXD3/RPO2/BARHL2/IGF1/CYR61/IL1RN/IL6/INHBA/IRF1/ISL1/KDR/AMIGO3/HES5/LAMA3/LCK/ARHGDI1/LGALS9/SMAD3/MITF/NEU1/NRAS/NTF3/P ALM/PARK2/LEF1/CEND1/ANGPT4/ATP8A2/PML/SSH1/LIMS2/IFT122/PRKD1/MAP2K2/BGLAP/CCL11/SFRP2/BMP4/SLC8A1/BMPR1B/SLIT1/SOX9/STK3/SUPT6H/ZEB1/TNFAIP3/T NFRSF1A/PHLDA2/TWIST1/CCR2/WNT10B/YWHAG/ZAP70/PAX8/CXCR4/CALR/COLQ/SCRT1/HOPX/SCIN/RUNX1/TP63/FADD/SPHK1/CBFA2T2/ADIPOQ/H2AFY/RAPGEF2/ULK2 | 105 |
| GO:0072511 | divalent inorganic cation transport                | 37/901  | 402/17046  | 0.00075 | 0.0147  | 0.01156 | TRDN/CLCA1/CCR1/C15orf27/TRPM6/CTGF/TRPV3/BHLHA15/DRD4/RASA3/CRACR2B/GPER1/ANXA6/LCK/ATP1A2/NFATC3/OPRL1/PIK3CG/PML/TLR9/ZDHHC13/TRPV6/SLC30A10 /CHRNA9/PRKD1/TRPV5/TRPC7/TRIM27/BMP4/SLC8A1/TRPC4/TRPC6/TRPM2/CACNA1E/CACNB2/CASQ1/SMDT1                                                                                                                                                                                                                                                                                                                                                                                              | 37  |
| GO:0032870 | cellular response to hormone stimulus              | 56/901  | 684/17046  | 0.00076 | 0.01472 | 0.01158 | TCIRG1/NPFFR2/ADCY3/AP3S1/CPS1/CYP11A1/EGFR/EGR3/EIF4G1/ESR1/FGF10/RASA3/FOXC2/FOXO1/MTOR/FGF22/GNAS/GPER1/GRB10/NRG1/NR4A1/IGF2/IL6/INHBA/ISL1/LC K/LHCGR/LMO2/ATP1A2/NRAS/P2RY6/LEF1/PRKAG3/TLR9/PRKAR1B/LMBRD1/MAPK3/MAP2K2/PSMB4/PSMD7/PTGFR/PTPRE/PXN/RASGRF2/BMP4/VAMP2/WNT10B/PAX8/NRO B2/TRIM63/MGARP/IRS2/ADIPOQ/RAPGEF2/FGF19/NR1H4                                                                                                                                                                                                                                                                                          | 56  |
| GO:0006171 | cAMP biosynthetic process                          | 16/901  | 123/17046  | 0.00076 | 0.01473 | 0.01158 | NPFFR2/ADCY3/ADM/ADRB3/DRD4/GABBR1/GNAS/GPER1/HPCA/LHCGR/MC2R/OPRL1/PALM/MRAP/SCT/CCR2                                                                                                                                                                                                                                                                                                                                                                                                                                                                                                                                                 | 16  |
| GO:0044723 | single-organism carbohydrate metabolic process     | 55/901  | 669/17046  | 0.00076 | 0.01475 | 0.0116  | GNE/B4GALT7/GALNT15/CLN5/SLC51B/NEU4/GALM/CPS1/PARP4/B3GLCT/MGAT5B/DDOST/ENO2/TRAK1/FOXO1/AKR1B1/MTOR/FUCA1/SLC37A4/ST6GALNAC3/GBGT1/GAPDHS /SLC17A5/DHDH/GPER1/EOGT/GRB10/HAS1/HK1/HRH1/IGF1/IGF2/IL6/MUC21/LHCGR/MGAT1/NEU1/OAS2/PARK2/CHST15/SIRT6/GALNT7/PGAM2/PKM/PRKAG3/POMC/PPP1C B/PPP1CC/CSGALNACT1/PHLDA2/MOGS/CALR/IRS2/STBD1/ADIPOQ                                                                                                                                                                                                                                                                                        | 55  |
| GO:0018212 | peptidyl-tyrosine modification                     | 31/901  | 318/17046  | 0.00077 | 0.01491 | 0.01172 | ABI1/IL31RA/EGFR/EPHA1/EPHA3/EPH4/FGF10/MTOR/NPTN/DOK7/NRG1/IGF1/IGF2/IL6/IL12RB2/ISL1/ITGB2/KDR/HES5/LCK/NTF3/ANGPT4/MAPK3/MAP2K2/PXN/TRIM27/NO D2/SFRP2/TNFRSF1A/ZAP70/ADIPOQ                                                                                                                                                                                                                                                                                                                                                                                                                                                        | 31  |
| GO:0061323 | cell proliferation involved in heart morphogenesis | 5/901   | 15/17046   | 0.00079 | 0.01506 | 0.01184 | BMP10/ISL1/PITX2/BMP4/SOX9                                                                                                                                                                                                                                                                                                                                                                                                                                                                                                                                                                                                             | 5   |
| GO:0003338 | metanephros morphogenesis                          | 7/901   | 30/17046   | 0.00079 | 0.01506 | 0.01184 | FGF10/SOX8/FMN1/HES5/BMP4/SOX9/PAX8                                                                                                                                                                                                                                                                                                                                                                                                                                                                                                                                                                                                    | 7   |

|            |                                                                    |         |            |         |         |         |                                                                                                                                                                                                                                                                                                                                                                                                                                                                                                                                                                                                                                                                                                                                                                                                                                                                                                                                                                                                                                                                                                                                                                                                                                                                                                                                                                                                                                                                                                                                                                                                                                                                                                                                                                                                                                                                                                                                                                                                                                                                                                                                                                                                                                                                                                                                                                                                                                                                                                                                                                                                                                                                                                                                                                                                                                                                                                                                                                                                                                                                                                                                                                                                                                                                                                                                                                                                                                                                                                                  |     |
|------------|--------------------------------------------------------------------|---------|------------|---------|---------|---------|------------------------------------------------------------------------------------------------------------------------------------------------------------------------------------------------------------------------------------------------------------------------------------------------------------------------------------------------------------------------------------------------------------------------------------------------------------------------------------------------------------------------------------------------------------------------------------------------------------------------------------------------------------------------------------------------------------------------------------------------------------------------------------------------------------------------------------------------------------------------------------------------------------------------------------------------------------------------------------------------------------------------------------------------------------------------------------------------------------------------------------------------------------------------------------------------------------------------------------------------------------------------------------------------------------------------------------------------------------------------------------------------------------------------------------------------------------------------------------------------------------------------------------------------------------------------------------------------------------------------------------------------------------------------------------------------------------------------------------------------------------------------------------------------------------------------------------------------------------------------------------------------------------------------------------------------------------------------------------------------------------------------------------------------------------------------------------------------------------------------------------------------------------------------------------------------------------------------------------------------------------------------------------------------------------------------------------------------------------------------------------------------------------------------------------------------------------------------------------------------------------------------------------------------------------------------------------------------------------------------------------------------------------------------------------------------------------------------------------------------------------------------------------------------------------------------------------------------------------------------------------------------------------------------------------------------------------------------------------------------------------------------------------------------------------------------------------------------------------------------------------------------------------------------------------------------------------------------------------------------------------------------------------------------------------------------------------------------------------------------------------------------------------------------------------------------------------------------------------------------------------------|-----|
| GO:0002862 | negative regulation of inflammatory response to antigenic stimulus | 4/901   | 9/17046    | 0.00079 | 0.01506 | 0.01185 | NLRP6/IL20RB/PSMB4/NOD2                                                                                                                                                                                                                                                                                                                                                                                                                                                                                                                                                                                                                                                                                                                                                                                                                                                                                                                                                                                                                                                                                                                                                                                                                                                                                                                                                                                                                                                                                                                                                                                                                                                                                                                                                                                                                                                                                                                                                                                                                                                                                                                                                                                                                                                                                                                                                                                                                                                                                                                                                                                                                                                                                                                                                                                                                                                                                                                                                                                                                                                                                                                                                                                                                                                                                                                                                                                                                                                                                          | 4   |
| GO:1901293 | nucleoside phosphate biosynthetic process                          | 31/901  | 319/17046  | 0.00081 | 0.0155  | 0.01219 | TCIRG1/NPFFR2/ADCY3/ACOT7/ADM/ADRB3/DRD4/GABBR1/AMPD2/AMPD3/GNAS/GPER1/GUCY1A3/NME7/ACACB/HPCA/NME9/LHCGR/MC2R/ME1/NPPC/OAS2/OPRL1/ATP5B/PALM/PKM/MRAP/SCT/CCR2/UPP1/KMO                                                                                                                                                                                                                                                                                                                                                                                                                                                                                                                                                                                                                                                                                                                                                                                                                                                                                                                                                                                                                                                                                                                                                                                                                                                                                                                                                                                                                                                                                                                                                                                                                                                                                                                                                                                                                                                                                                                                                                                                                                                                                                                                                                                                                                                                                                                                                                                                                                                                                                                                                                                                                                                                                                                                                                                                                                                                                                                                                                                                                                                                                                                                                                                                                                                                                                                                         | 31  |
| GO:0071704 | organic substance metabolic process                                | 555/901 | 9633/17046 | 0.00083 | 0.01579 | 0.01242 | AKT3/ABI1/CDH3/GNE/ZNF783/TSPAN5/CDH13/SUGP2/MBNL2/FARP1/CDKN1C/SPEG/BCKDK/TCIRG1/C1D/ZBTB18/PITRM1/MTHFS/PDPN/DMRT2/CELF1/CEL2/TBR1/HCST/NPFR2/ADCY3/PNRC1/TMED10/SLC27A2/LECT1/ADAM29/HNRNPUL1/RPP14/HIBADH/CHI3L1/ERLIN2/PSIP1/CHI3L2/EGLN2/B4GALT7/ACOT7/EXOC3/ADPRHL1/CARD16/ZBED9/CIDEA/ALPK2/GALNT15/CLCA1/CLN5/MRPL52/CCR1/SLC51B/CNP/APOA1BP/NEU4/COL9A3/COL11A1/GALM/MAP3K8/ZFP42/ADM/IL31RA/EGFLAM/UBLCP1/HUS1B/CPD/CPM/CP51/PXDNL/CRABP1/ZNF358/TRPM6/MI2/PARP4/LDLRAD3/B3GLCT/MGAT5B/CSTA/ZNF738/CTGF/SMYD1/PPM1L/SH3D19/CYLD/MBOAT1/ADRB3/ESCO2/CYP11A1/ZNF782/FITM1/ADAL/ZNF709/ZNF781/CITED4/DB1/LONRF2/DDOST/RNF168/ZNF366/BHLHA15/NLRP6/DIO3/DLG2/DNMT3A/ABAT/DPH1/DRD4/ECE1/AGXT/EEF2/EGFR/EGR3/PATL2/EIF4G1/A2M/ELK4/LIPH/ENO2/ADCK5/EPHA1/EPHA3/EPHB4/ESR1/ALAS1/F11/FAH/PRSS54/RNF182/SP8/FGA/FGF10/FHIT/XRN2/RASA3/PPM1E/SBNO2/TRAK1/MSRB2/ACIN1/FOXL1/FOX C2/FOXO1/AKR1B1/GGA3/DIP2A/FLOT2/NUP210/NEDD4L/LARP1/PUM2/RYPB/MORC3/MAPK8IP2/TSSK2/VGLL2/MTOR/FUCA1/SLC37A4/GABBR1/RNF144B/ZNF549/ST6GALNAC3/GAK/SAMM50/PNKD/TENM4/ACOT11/LTN1/FBXL21/FBXO2/LCE2B/SACS/GATM/GBGT1/GAPDH5/SLC17A5/RP56KC1/PABPC1/DNAJC2/FGF22/NPTN/AMPD2/PDE7B/DK3/GLS2/VPS4A/AMPD3/DHDH/BMP10/ZNF638/GNAS/ZNF311/TMPRSS12/PIGW/ZNF844/THEM5/GPER1/EOGT/DOK7/GRB10/MRPS18B/ZBTB44/DNAJC15/GSTP1/GTF2B/BRF1/GUCY1A3/NME7/PADI1/GZMA/ANXA2/HAS1/SERPIND1/SOX8/NRG1/HK1/HLX/HMGA1/NR4A1/ACACB/HPCA/EPBA2/HOXB3/HOXCA/HOXCS/HOXC6/HOXD3/HRH1/HSD1B1/HSD17B2/ACADL/HSPA1L/HSP90AA1/HSP90AB1/DUPD1/ADAMTSL5/TFAP2E/ID3/ZC3H12D/COL28A1/FMN1/BARHL2/NME9/IGF1/IGF2/CYR61/LCE1C/LCE1D/LCE2D/IL1RN/IL6/IL12RB2/PRSS41/IL16/FOXK2/INHBA/INPP5A/IRF1/ISL1/ITGB2/ITIH3/ITIH4/IVL/JUP/USP50/HLS1/KCNH2/KDR/ACAT1/HES5/AFF3/LCK/MUC21/LDLR/LGALS9/LHCGR/LMNA/LMO2/LOX/LTB/SMA D3/MC2R/ME1/ME2/MEF2D/MAP3K1/MEOX1/MEOX2/MF2/MGAT1/MITF/LHX8/MOCS1/MOV10/NUDT1/MYH4/NDUFB4/DRG1/NEU1/ATP1A2/NFATC3/NFYB/NHLH2/NOV/NPPC/NRAS/NTF3/OAS2/OPRL1/PAFAH2/ATP5B/PALM/PARK2/SPOCK3/UTP11L/LEF1/DDX47/PRR16/CHST15/ANGPT4/PDE4C/PCYOX1/PDE7A/SIRT6/PDE6B/GALNT7/PGAM2/PI3/PIC C/PIK3CG/PITX2/PKHD1/PKM/PLA2G2A/PLAGL1/PRKAG3/PML/RIPPLY3/SLCO1C1/PNLIP/RIPK4/TLR9/TREM1/CYTL1/POMC/SSH1/PON1/MOV10L1/POU2AF1/BNC2/MED18/CYP2 W1/RPP25/LPCAT2/BANP/PPP1CB/HERC6/PPP1CC/PIWIL2/ELP3/PRMT6/DNAJC17/ZNF532/PPP2R2B/FANCI/WDR33/SMPD3/CNOT11/VAC14/PRKAR1B/LMBRD1/CSGALNACT1/PR KD1/WBS2/MYNN/APOBR/MAPK3/MAP2K2/PROC/MRAP/PRMT8/MASP1/HTRA1/PSMB4/PAK6/ARNTL2/RGMA/PRDM11/PSMD7/PTGFR/TENM2/GATAD2B/KLHL8/RDH14/METTL 14/MARK4/CCAR2/PTPRE/PXN/CREBZF/ACTA2/RASGRF2/RFC2/TRIM27/RGR/RGS12/EXOC4/RPA3/RPL8/RPL29/SCT/CCL11/CCL17/ABHD4/MRPS14/PRSS22/NPAS3/NOD2/STRA6/ SFRP2/TRA2B/GZF1/SGK1/CERK/BMP4/ZNF649/BMPR1B/BRD9/ZSCAN18/BOK/SOX9/SRP68/STAT2/STK3/STK10/SUPT6H/BST2/VAMP2/TAF4B/TBP/TCEA1/TCEB2/ZEB1/ACTC1/TE AD3/TERF1/TGM2/TIMP3/TLE3/TNFAIP3/TNFRSF1A/TNXB/TRAFA1/TRAFA5/PHLDA2/TWIST1/CCR2/TNFRSF4/UCP1/UUP1/VARS/WNT10B/YWHAG/ZAP70/ZNF7/ZNF124/ZNF177/PTP 4A1/MOGS/PAX8/CXCR4/FZD5/RAB7A/ERI3/CARD14/GDPD3/CERS4/ZNF665/EPHX3/ZC3H14/ERMP1/ZNF606/ZC3H12A/FAAP100/CPEB4/COL18A1/ZNF436/EEDP1/CALR/QTRT1/S LIRP/COLQ/CAST/SCRT1/HIST1H3A/SLA2/ZNF397/NROB2/HOPX/TTBK1/SPINK7/TRIM63/KDM2B/LOXL3/GTPBP3/CBX2/RAE1/GAS7/CDK10/KMO/RUNX1/TP63/RUNX3/SERPINA6/I RS2/ACTN1/CRADD/FADD/TNFRSF11A/ALDH1A2/STK19/SYNJ2/SPHK1/BUD31/CCNA1/ENDOU/STBD1/LIMD1/CH25H/ERI1/PIAS2/ZFAND2A/MAP3K6/LDB2/SLC16A3/CBFA2T2/AU RKB/NEURL3/SDR42E1/ADIPOQ/RAB3D/H2AFY/ENTPD3/PREPL/MICAL2/N4BP1/VGLL4/NUP93/RAPGEF2/ULK2/ZBTB39/LPGAT1/FGF19/NR1H4 | 555 |
| GO:0048545 | response to steroid hormone                                        | 36/901  | 390/17046  | 0.00084 | 0.01582 | 0.01244 | ADM/CP51/CTGF/CYP11A1/CITED4/ZNF366/DNMT3A/DRD4/AGXT/EGFR/ESR1/FGA/FGF10/GJB2/GPER1/NR4A1/HTR5A/IL1RN/IL6/ISL1/LOX/ATP1A2/OPRL1/LEF1/PTGFR/BGLAP/ BMP4/SLC9A3/TIMP3/CALR/NROB2/TRIM63/MGARF/ALDH1A2/ADIPOQ/NR1H4                                                                                                                                                                                                                                                                                                                                                                                                                                                                                                                                                                                                                                                                                                                                                                                                                                                                                                                                                                                                                                                                                                                                                                                                                                                                                                                                                                                                                                                                                                                                                                                                                                                                                                                                                                                                                                                                                                                                                                                                                                                                                                                                                                                                                                                                                                                                                                                                                                                                                                                                                                                                                                                                                                                                                                                                                                                                                                                                                                                                                                                                                                                                                                                                                                                                                                 | 36  |
| GO:0032881 | regulation of polysaccharide metabolic process                     | 8/901   | 39/17046   | 0.00084 | 0.01584 | 0.01246 | MTOR/GRB10/IGF1/IGF2/POMC/PPP1CB/PHLDA2/IRS2                                                                                                                                                                                                                                                                                                                                                                                                                                                                                                                                                                                                                                                                                                                                                                                                                                                                                                                                                                                                                                                                                                                                                                                                                                                                                                                                                                                                                                                                                                                                                                                                                                                                                                                                                                                                                                                                                                                                                                                                                                                                                                                                                                                                                                                                                                                                                                                                                                                                                                                                                                                                                                                                                                                                                                                                                                                                                                                                                                                                                                                                                                                                                                                                                                                                                                                                                                                                                                                                     | 8   |
| GO:0098771 | inorganic ion homeostasis                                          | 49/901  | 581/17046  | 0.00084 | 0.01584 | 0.01246 | TCIRG1/TRDN/CLN5/CCR1/ADM/DRD4/ESR1/NEDD4/STEAP2/NPTN/GPER1/FLVCR1/ANXA6/KCNH2/KDR/LCK/MF2/NUBP1/ATP1A2/OPRL1/ATP5B/PARK2/PDE6B/PIK3CG/PKHD1 /PML/SLC30A10/CHRNA9/PRKD1/SLAMF8/TRPC7/CCL11/SGK1/BMP4/SLC4A1/SLC8A1/SLC9A3/TGM2/TRPCA/TRPC6/CCR2/CA7/CXCR4/RAB7A/CALR/ATP13A4/CASQ1/SMDT1/MT L5                                                                                                                                                                                                                                                                                                                                                                                                                                                                                                                                                                                                                                                                                                                                                                                                                                                                                                                                                                                                                                                                                                                                                                                                                                                                                                                                                                                                                                                                                                                                                                                                                                                                                                                                                                                                                                                                                                                                                                                                                                                                                                                                                                                                                                                                                                                                                                                                                                                                                                                                                                                                                                                                                                                                                                                                                                                                                                                                                                                                                                                                                                                                                                                                                   | 49  |
| GO:0005976 | polysaccharide metabolic process                                   | 14/901  | 101/17046  | 0.00085 | 0.01584 | 0.01246 | CP51/MTOR/GRB10/HAS1/IGF1/IGF2/PRKAG3/POMC/PPP1CB/PPP1CC/CSGALNACT1/PHLDA2/IRS2/STBD1                                                                                                                                                                                                                                                                                                                                                                                                                                                                                                                                                                                                                                                                                                                                                                                                                                                                                                                                                                                                                                                                                                                                                                                                                                                                                                                                                                                                                                                                                                                                                                                                                                                                                                                                                                                                                                                                                                                                                                                                                                                                                                                                                                                                                                                                                                                                                                                                                                                                                                                                                                                                                                                                                                                                                                                                                                                                                                                                                                                                                                                                                                                                                                                                                                                                                                                                                                                                                            | 14  |
| GO:0010876 | lipid localization                                                 | 31/901  | 320/17046  | 0.00086 | 0.01599 | 0.01258 | ABCA9/SLC27A2/CIDEA/SLC51B/FITM1/DRD4/SLC10A4/ATP11A/VPS4A/FFAR2/ACACB/IL6/INHBA/AQP9/ATP9B/LDLR/ANO7/PARK2/ATP8A2/SLCO1C1/PNLIP/POMC/PON1/APOBR /ABHD4/STRA6/ZC3H12A/IRS2/TNFRSF11A/ADIPOQ/NR1H4                                                                                                                                                                                                                                                                                                                                                                                                                                                                                                                                                                                                                                                                                                                                                                                                                                                                                                                                                                                                                                                                                                                                                                                                                                                                                                                                                                                                                                                                                                                                                                                                                                                                                                                                                                                                                                                                                                                                                                                                                                                                                                                                                                                                                                                                                                                                                                                                                                                                                                                                                                                                                                                                                                                                                                                                                                                                                                                                                                                                                                                                                                                                                                                                                                                                                                                | 31  |

|            |                                                            |         |            |         |         |         |                                                                                                                                                                                                                                                                                                                                                                                                                                                                                                                                                                                                                                                                                                                        |     |
|------------|------------------------------------------------------------|---------|------------|---------|---------|---------|------------------------------------------------------------------------------------------------------------------------------------------------------------------------------------------------------------------------------------------------------------------------------------------------------------------------------------------------------------------------------------------------------------------------------------------------------------------------------------------------------------------------------------------------------------------------------------------------------------------------------------------------------------------------------------------------------------------------|-----|
| GO:0043255 | regulation of carbohydrate biosynthetic process            | 12/901  | 79/17046   | 0.00086 | 0.01599 | 0.01258 | FOXO1/MTOR/GPER1/GRB10/HRH1/IGF1/IGF2/IL6/LHCGR/PPP1CB/IRS2/ADIPOQ                                                                                                                                                                                                                                                                                                                                                                                                                                                                                                                                                                                                                                                     | 12  |
| GO:0048568 | embryonic organ development                                | 38/901  | 420/17046  | 0.00089 | 0.01639 | 0.01289 | CDKN1C/GJB6/COL11A1/ADM/EGFR/FGF10/FOXC2/GATM/GNAS/FLVCR1/HLX/HOXB3/HOXC4/HOXD3/ID3/CYR61/KDR/LMO2/SMAD3/LEF1/ATP8A2/PITX2/CHRNA9/IFT122/SCT/STRA6/BMP4/SLC8A1/SOX9/STK3/ZEB1/TWIST1/PAX8/FZD5/KDM2B/RUNX1/ALDH1A2/MICAL2                                                                                                                                                                                                                                                                                                                                                                                                                                                                                              | 38  |
| GO:0030817 | regulation of cAMP biosynthetic process                    | 15/901  | 113/17046  | 0.00089 | 0.01639 | 0.01289 | NPFRR2/ADM/ADRB3/DRD4/GABBR1/GNAS/GPER1/HPCA/LHCGR/MC2R/OPRL1/PALM/MRAP/SCT/CCR2                                                                                                                                                                                                                                                                                                                                                                                                                                                                                                                                                                                                                                       | 15  |
| GO:0042325 | regulation of phosphorylation                              | 97/901  | 1341/17046 | 0.00089 | 0.01639 | 0.01289 | ABI1/CDKN1C/NPFRR2/ADCY3/CHI3L1/CCR1/MAP3K8/IL31RA/CTGF/ADRB3/NLRP6/DRD4/EGFR/EPHA1/FGA/FGF10/RASA3/PPM1E/FOXO1/MAPK8IP2/MTOR/GAPDHS/FGF22/NPTN/BMP10/GPER1/DOK7/GRB10/DNAJC15/GSTP1/ANXA2/NRG1/HSP90AB1/IGF1/IGF2/CYR61/IL1RN/IL6/INHBA/ISL1/ITGB2/KDR/HES5/LCK/LGALS9/SMAD3/MAP3K1/NRAS/NTF3/OPRL1/PARK2/ANGPT4/SIRT6/PIK3CG/PKHD1/PLA2G2A/PML/TLR9/ELP3/VAC14/PRKAR1B/PRKD1/MAPK3/MAP2K2/SLAMF8/PSMB4/PAK6/PSMD7/PXN/RASGRF2/TRIM27/CCL11/CCL17/NOD2/SFRP2/BMP4/SOX9/STK3/STK10/TNFAIP3/TNFRSF1A/TNXP/TWIST1/TNFRSF4/YWHAG/CXCR4/FZD5/CARD14/CDK10/IRS2/TNFRSF11A/SPHK1/MAP3K6/ADIPOQ/H2AFY/RAPGEF2/FGF19                                                                                                           | 97  |
| GO:0051173 | positive regulation of nitrogen compound metabolic process | 117/901 | 1672/17046 | 0.0009  | 0.0165  | 0.01297 | CDH13/CDKN1C/DMRT2/TBR1/ERLIN2/PSIP1/ADM/IL31RA/ADRB3/CITED4/RNF168/BHLHA15/EEF2/EGFR/ESR1/FGF10/SBNO2/FOXC2/FOXO1/LARP1/VGLL2/MTOR/GAPDHS/PABPC1/DNAJC2/BMP10/GNAS/GPER1/BRF1/GUCY1A3/SOX8/HMGA1/NR4A1/HPCA/HSP90AA1/HSP90AB1/TFAP2E/BARHL2/IGF1/IGF2/CYR61/IL6/FOXK2/INHBA/IRF1/ISL1/JUP/HES5/LGALS9/LHCGR/LMNA/LMO2/SMAD3/MC2R/MEF2D/MEOX1/MEOX2/MITF/NFATC3/NFYB/NHLH2/NPPC/NTF3/PARK2/LEF1/PRR16/PITX2/PLAGL1/RIPK4/TLR9/CYTL1/POMC/BANP/PIWIL2/PRKD1/MAPK3/MRAP/ARNTL2/RGMA/TRIM27/SCT/NPAS3/NOD2/SFRP2/TRA2B/BMP4/ZNF649/BMPR1B/SOX9/STK3/SUPT6H/TBP/TCEA1/TCEB2/ZEB1/TEAD3/TLR5/TNFRSF1A/TRAF1/TRAF5/TWIST1/WNT10B/PAX8/FZD5/CARD14/CALR/RUNX1/TP63/RUNX3/FADD/TNFRSF11A/SPHK1/PIAS2/LDB2/CBFA2T2/MICAL2/NR1H4 | 117 |
| GO:0007159 | leukocyte cell-cell adhesion                               | 39/901  | 435/17046  | 0.00091 | 0.01661 | 0.01306 | MAP3K8/CYLD/DDOST/EGR3/FLOT2/MTOR/HLA-DOA/HLA-DPA1/HLA-E/HLX/ZC3H12D/IGF1/IGF2/IL6/IRF1/ITGB2/ITGB7/LCK/LCP1/LGALS9/SMAD3/NFATC3/LEF1/PIK3CG/IL20RB/APBB1IP/PAG1/NOD2/BMP4/STK10/ZEB1/CCR2/TNFRSF4/ZAP70/FZD5/SLA2/FADD/RSAD2/CD8A                                                                                                                                                                                                                                                                                                                                                                                                                                                                                     | 39  |
| GO:0001667 | ameboidal-type cell migration                              | 28/901  | 280/17046  | 0.00092 | 0.01683 | 0.01323 | CDH13/EGR3/EPHB4/FAT2/FGF10/VASH1/FOXC2/BMP10/HAS1/SOX8/NR4A1/ISL1/ITGB7/KDR/MCC/NOV/LEF1/ANGPT4/PITX2/PML/PRKD1/PLEKHG5/BMP4/SLC8A1/SOX9/TWIST1/SH3BGRL3/FGF19                                                                                                                                                                                                                                                                                                                                                                                                                                                                                                                                                        | 28  |
| GO:0007507 | heart development                                          | 40/901  | 450/17046  | 0.00092 | 0.01683 | 0.01323 | SPEG/COL11A1/ADM/SMYD1/ECE1/EPHB4/FOX1/FOXC2/MTOR/TENM4/BMP10/NRG1/ACACB/ID3/CYR61/ISL1/KCNJ8/LMNA/SMAD3/MEF2D/MYL2/NFATC3/SIRT6/PITX2/RIPPLY3/PARVA/IFT122/STRA6/SFRP2/BMP4/SLC8A1/SOX9/STK3/ACTC1/TWIST1/CALR/HOPX/ALDH1A2/MICAL2/FGF19                                                                                                                                                                                                                                                                                                                                                                                                                                                                              | 40  |
| GO:0034109 | homotypic cell-cell adhesion                               | 41/901  | 465/17046  | 0.00094 | 0.01705 | 0.01341 | MAP3K8/CYLD/DDOST/EGR3/FGA/FLOT2/MTOR/GNAS/HLA-DOA/HLA-DPA1/HLA-E/HLX/ZC3H12D/IGF1/IGF2/IL6/IRF1/ITGB2/JUP/LCK/LCP1/LGALS9/SMAD3/NFATC3/LEF1/PIK3CG/IL20RB/APBB1IP/PAG1/NOD2/BMP4/STK10/ZEB1/CCR2/TNFRSF4/ZAP70/FZD5/SLA2/FADD/RSAD2/CD8A                                                                                                                                                                                                                                                                                                                                                                                                                                                                              | 41  |
| GO:0050728 | negative regulation of inflammatory response               | 13/901  | 91/17046   | 0.00096 | 0.01742 | 0.0137  | NLRP6/GPER1/GSTP1/ISL1/SMAD3/NOV/IL20RB/PSMB4/NOD2/TNFAIP3/TNFRSF1A/NLRX1/ADIPOQ                                                                                                                                                                                                                                                                                                                                                                                                                                                                                                                                                                                                                                       | 13  |
| GO:0001818 | negative regulation of cytokine production                 | 22/901  | 201/17046  | 0.00098 | 0.01776 | 0.01397 | CDH3/CIDEA/CYLD/GSTP1/IL6/INHBA/LGALS9/LEF1/PML/IL20RB/TLR9/POMC/TRIM27/NOD2/BPI/BST2/TNFAIP3/TWIST1/TNFRSF4/NLRX1/ZC3H12A/ADIPOQ                                                                                                                                                                                                                                                                                                                                                                                                                                                                                                                                                                                      | 22  |
| GO:0050927 | positive regulation of positive chemotaxis                 | 6/901   | 23/17046   | 0.001   | 0.01788 | 0.01406 | CDH13/FGF10/IL16/KDR/SMAD3/NTF3                                                                                                                                                                                                                                                                                                                                                                                                                                                                                                                                                                                                                                                                                        | 6   |
| GO:0072243 | metanephric nephron epithelium development                 | 6/901   | 23/17046   | 0.001   | 0.01788 | 0.01406 | SOX8/ACAT1/HES5/SOX9/PAX8/ADIPOQ                                                                                                                                                                                                                                                                                                                                                                                                                                                                                                                                                                                                                                                                                       | 6   |

|            |                                                              |         |            |         |         |         |                                                                                                                                                                                                                                                                                                                                                                                                                                                                                                                                                                                                                                                                                                                                                                                                                                  |     |
|------------|--------------------------------------------------------------|---------|------------|---------|---------|---------|----------------------------------------------------------------------------------------------------------------------------------------------------------------------------------------------------------------------------------------------------------------------------------------------------------------------------------------------------------------------------------------------------------------------------------------------------------------------------------------------------------------------------------------------------------------------------------------------------------------------------------------------------------------------------------------------------------------------------------------------------------------------------------------------------------------------------------|-----|
| GO:0016310 | phosphorylation                                              | 134/901 | 1964/17046 | 0.00102 | 0.01825 | 0.01435 | AKT3/ABI1/GNE/CDKN1C/SPEG/BCKDK/HCST/NPFFR2/ADCY3/CHI3L1/ALPK2/CCR1/MAP3K8/IL31RA/TRPM6/CTGF/PPM1L/ADRB3/NLRP6/DRD4/EGFR/ENO2/ADCK5/EPHA1/EPHA3/EPHB4/FGA/FGF10/RASA3/PPM1E/FOXO1/MORC3/MAPK8IP2/TSSK2/MTOR/GAK/GAPDH5/RP56KC1/FGF22/NPTN/BMP10/GPER1/DOK7/GRB10/DNAJC15/GSTP1/NME7/ANXA2/NRG1/HK1/HSP90AB1/NME9/IGF1/IGF2/CYR61/IL1RN/IL6/IL12RB2/INHBA/ISL1/ITGB2/KCNH2/KDR/HESS/LCK/LGALS9/SMAD3/MAP3K1/NDUFB4/NRAS/NTF3/OPRL1/PARK2/ANGPT4/SIRT6/PGAM2/PIK3CG/PKHD1/PKM/PLA2G2A/PRKAG3/PML/RIPK4/TLR9/ELP3/VAC14/PRKAR1B/PRKD1/MAPK3/MAP2K2/SLAMF8/PSMB4/PAK6/PSMD7/MARK4/PXN/RASGRF2/TRIM27/CCL11/CCL17/NOD2/SFRP2/SGK1/CERK/BMP4/BMPR1B/SOX9/STK3/STK10/TNFAIP3/TNFRSF1A/TNKB/TWIST1/TNFRSF4/YWHAG/ZAP70/CXCR4/FZD5/CARD14/TTBK1/CDK10/RUNX3/IRS2/TNFRSF11A/STK19/SPHK1/LIMD1/MAP3K6/AURKB/ADIPOQ/H2AFY/RAPGEF2/ULK2/FGF19 | 134 |
| GO:0023014 | signal transduction by protein phosphorylation               | 64/901  | 817/17046  | 0.00102 | 0.01825 | 0.01435 | NPFFR2/CHI3L1/CCR1/MAP3K8/IL31RA/CTGF/PPM1L/ADRB3/NLRP6/DRD4/EGFR/FGA/FGF10/RASA3/FOXO1/MAPK8IP2/FGF22/BMP10/GPER1/GSTP1/NRG1/IGF1/IGF2/CYR61/IL1RN/IL6/INHBA/KCNH2/KDR/LGALS9/MAP3K1/NRAS/NTF3/PARK2/PIK3CG/PKHD1/PLA2G2A/TLR9/MAPK3/MAP2K2/PSMB4/PAK6/PSMD7/PXN/RASGRF2/CCL11/CCL17/NOD2/SFRP2/BMP4/BMPR1B/SOX9/STK3/STK10/TNKB/CXCR4/FZD5/CDK10/IRS2/TNFRSF11A/MAP3K6/ADIPOQ/RAPGEF2/FGF19                                                                                                                                                                                                                                                                                                                                                                                                                                    | 64  |
| GO:0051050 | positive regulation of transport                             | 65/901  | 833/17046  | 0.00103 | 0.01837 | 0.01444 | CDH3/TRDN/CCR1/SLC51B/TRPV3/ABAT/DRD4/EGFR/UNC13D/FGA/EXPH5/MLC1/NEDD4L/GLS2/VPS4A/GPR26/GPER1/FFAR2/ANXA2/NRG1/ANXA13/HLA-E/HPCA/HSPA1L/HSP90AB1/IGF1/IL6/INHBA/ISL1/JUP/KCNH2/IPO5/LGALS9/SMAD3/NTF3/OPRL1/PARK2/ATP8A2/TLR9/PON1/GOLPH3L/SMPD3/SCT/NOD2/SFRP2/SGK1/BMP4/VAMP2/TRPC6/TWIST1/TNFRSF4/YWHAG/CACNB2/FZD5/RAB7A/CALR/NROB2/SCIN/IRS2/TNFRSF11A/SPHK1/SYT7/ADIPOQ/RAB3D/FGF19                                                                                                                                                                                                                                                                                                                                                                                                                                       | 65  |
| GO:0006873 | cellular ion homeostasis                                     | 43/901  | 497/17046  | 0.00104 | 0.01837 | 0.01444 | TCIRG1/TRDN/CLN5/CCR1/ADM/DRD4/ESR1/NEDD4L/NPTN/GPER1/FLVCR1/ANXA6/LCK/NUBP1/ATP1A2/OPRL1/ATP5B/PDE6B/PIK3CG/PKHD1/PML/SLC30A10/CHRNA9/PRKD1/SLAMF8/TRPC7/CCL11/SGK1/BMP4/SLC4A1/SLC8A1/TGM2/TRPC4/TRPC6/CCR2/CA7/CXCR4/RAB7A/CALR/ATP13A4/CASQ1/SMDT1/MTL5                                                                                                                                                                                                                                                                                                                                                                                                                                                                                                                                                                      | 43  |
| GO:0009408 | response to heat                                             | 18/901  | 151/17046  | 0.00104 | 0.01837 | 0.01444 | PSIP1/TRPV3/NUP210/MTOR/DNAJC2/HSPA1L/HSP90AA1/HSP90AB1/IGF1/IL1R1/IL6/C11orf73/MAPK3/CCAR2/RPA3/CASQ1/RAE1/NUP93                                                                                                                                                                                                                                                                                                                                                                                                                                                                                                                                                                                                                                                                                                                | 18  |
| GO:2001236 | regulation of extrinsic apoptotic signaling pathway          | 18/901  | 151/17046  | 0.00104 | 0.01837 | 0.01444 | CYLD/FGA/FGF10/GPER1/GSTP1/NRG1/IGF1/INHBA/LMNA/PML/SFRP2/BMPR1B/STK3/TNFAIP3/TRAF1/BCL2L14/RUNX3/FADD                                                                                                                                                                                                                                                                                                                                                                                                                                                                                                                                                                                                                                                                                                                           | 18  |
| GO:1904019 | epithelial cell apoptotic process                            | 11/901  | 70/17046   | 0.00105 | 0.01839 | 0.01446 | DNMT3A/FGA/GPER1/IL6/KDR/PIK3CG/BMP4/STK3/TNFAIP3/COL18A1/CAST                                                                                                                                                                                                                                                                                                                                                                                                                                                                                                                                                                                                                                                                                                                                                                   | 11  |
| GO:0030808 | regulation of nucleotide biosynthetic process                | 17/901  | 139/17046  | 0.00107 | 0.01854 | 0.01458 | NPFFR2/ADM/ADRB3/DRD4/GABBR1/GNAS/GPER1/GUCY1A3/HPCA/LHCGR/MC2R/NPPC/OPRL1/PALM/MRAP/SCT/CCR2                                                                                                                                                                                                                                                                                                                                                                                                                                                                                                                                                                                                                                                                                                                                    | 17  |
| GO:1900371 | regulation of purine nucleotide biosynthetic process         | 17/901  | 139/17046  | 0.00107 | 0.01854 | 0.01458 | NPFFR2/ADM/ADRB3/DRD4/GABBR1/GNAS/GPER1/GUCY1A3/HPCA/LHCGR/MC2R/NPPC/OPRL1/PALM/MRAP/SCT/CCR2                                                                                                                                                                                                                                                                                                                                                                                                                                                                                                                                                                                                                                                                                                                                    | 17  |
| GO:0030282 | bone mineralization                                          | 13/901  | 92/17046   | 0.00107 | 0.01854 | 0.01458 | CCR1/FAM101A/SBNO2/RSPO2/IGF1/SMAD3/BGLAP/BMP4/SLC8A1/BMPR1B/SOX9/TWIST1/WNT10B                                                                                                                                                                                                                                                                                                                                                                                                                                                                                                                                                                                                                                                                                                                                                  | 13  |
| GO:0032609 | interferon-gamma production                                  | 13/901  | 92/17046   | 0.00107 | 0.01854 | 0.01458 | HLA-DPA1/IL12RB2/INHBA/ISL1/LGALS9/IL20RB/TLR9/TRIM27/NOD2/CCR2/FZD5/RUNX3/FADD                                                                                                                                                                                                                                                                                                                                                                                                                                                                                                                                                                                                                                                                                                                                                  | 13  |
| GO:0030814 | regulation of cAMP metabolic process                         | 16/901  | 127/17046  | 0.00108 | 0.01855 | 0.01459 | NPFFR2/ADM/ADRB3/DRD4/GABBR1/GNAS/GPER1/HPCA/LHCGR/MC2R/NPPC/OPRL1/PALM/MRAP/SCT/CCR2                                                                                                                                                                                                                                                                                                                                                                                                                                                                                                                                                                                                                                                                                                                                            | 16  |
| GO:0043467 | regulation of generation of precursor metabolites and energy | 12/901  | 81/17046   | 0.00108 | 0.01855 | 0.01459 | MTOR/GAPDH5/GRB10/DNAJC15/IGF1/IGF2/SIRT6/POMC/PPP1CB/CISD1/PHLDA2/IRS2                                                                                                                                                                                                                                                                                                                                                                                                                                                                                                                                                                                                                                                                                                                                                          | 12  |
| GO:0045445 | myoblast differentiation                                     | 12/901  | 81/17046   | 0.00108 | 0.01855 | 0.01459 | SMYD1/FLOT2/SOX8/NRG1/ID3/IGF1/ISL1/CCL17/BMP4/SOX9/WNT10B/CAST                                                                                                                                                                                                                                                                                                                                                                                                                                                                                                                                                                                                                                                                                                                                                                  | 12  |



|            |                                                |         |            |         |         |         |                                                                                                                                                                                                                                                                                                                                                                                                                                                                                                                                                                                                                                                                                   |     |
|------------|------------------------------------------------|---------|------------|---------|---------|---------|-----------------------------------------------------------------------------------------------------------------------------------------------------------------------------------------------------------------------------------------------------------------------------------------------------------------------------------------------------------------------------------------------------------------------------------------------------------------------------------------------------------------------------------------------------------------------------------------------------------------------------------------------------------------------------------|-----|
| GO:0006112 | energy reserve metabolic process               | 19/901  | 164/17046  | 0.00108 | 0.0186  | 0.01463 | ADCY3/CPS1/ADRB3/MTOR/GNAS/GRB10/ACACB/IGF1/IGF2/PRKAG3/POMC/PPP1CB/PPP1CC/PRKAR1B/VAMP2/PHLDA2/CACNA1E/IRS2/STBD1                                                                                                                                                                                                                                                                                                                                                                                                                                                                                                                                                                | 19  |
| GO:0022008 | neurogenesis                                   | 109/901 | 1548/17046 | 0.0011  | 0.01878 | 0.01477 | FARP1/CDKN1C/SPON2/ZBTB18/TACC2/TBR1/GPRIN1/CLN5/SEZ6/CNP/COL9A3/SCLT1/ADM/APCDD1/CYP11A1/DNMT3A/EFNA2/EGFR/EIF4G1/EML1/EPHA1/EPHA3/EPHB4/FGF10/RASA3/BTBD3/SPG20/NFASC/EPB41L3/NEDD4L/PSD3/MAPK8IP2/DFNB31/TENM4/FGF22/NPTN/GPER1/SOX8/KCNIP2/NRG1/HOXB3/HOXD3/HSP90AA1/HSP90AB1/ID3/RSP02/FMN1/BARHL2/IGF1/IL6/INHBA/ISL1/HES5/STMN1/ARHGDI2/LLGL1/LHX8/NEU1/NRAS/NTF3/PALM/PARK2/LEF1/CEND1/ATP8A2/PITX2/SSH1/MXRA8/PPP1CC/ELP3/PRKD1/MAPK3/MAP2K2/PSMB4/RGMA/TRPC7/PSMD7/TENM2/RASGRF2/S100A6/SGK1/BMP4/BMPR1B/SLIT1/BOK/SOX9/ZEB1/TRPC4/TRPC6/TWIST1/WNT10B/YWHAG/CACNB2/CXCR4/FZD5/LST1/CALR/SCRT1/PARD6B/GAS7/RUNX1/RUNX3/IRS2/ALDH1A2/CBFA2T2/ARHGEF10/RAPGEF2/ULK2/FGF19 | 109 |
| GO:0001101 | response to acid chemical                      | 28/901  | 284/17046  | 0.00115 | 0.01955 | 0.01538 | CPS1/CTGF/CYP11A1/DNMT3A/EGFR/EPHA3/AKR1B1/MTOR/GNAS/FFAR2/HPCA/HSD17B2/IL6/AQP2/IPO5/P2RY6/PON1/PTGFR/BMP4/SOX9/ZEB1/TIMP3/WNT10B/CPEB4/COL18A1/ALDH1A2/ADIPOQ/NR1H4                                                                                                                                                                                                                                                                                                                                                                                                                                                                                                             | 28  |
| GO:0010906 | regulation of glucose metabolic process        | 13/901  | 93/17046   | 0.00118 | 0.02009 | 0.0158  | FOXO1/MTOR/GRB10/IGF1/IGF2/IL6/PARK2/PGAM2/POMC/PPP1CB/PHLDA2/IRS2/ADIPOQ                                                                                                                                                                                                                                                                                                                                                                                                                                                                                                                                                                                                         | 13  |
| GO:0045747 | positive regulation of Notch signaling pathway | 7/901   | 32/17046   | 0.00119 | 0.02009 | 0.0158  | TSPAN5/FGF10/HES5/MFNG/NOV/NOD2/TP63                                                                                                                                                                                                                                                                                                                                                                                                                                                                                                                                                                                                                                              | 7   |
| GO:0030198 | extracellular matrix organization              | 34/901  | 369/17046  | 0.00119 | 0.02009 | 0.0158  | B4GALT7/COL9A3/COL11A1/COMP/EGFLAM/CTGF/A2M/FGA/FOXC2/BMP10/ANXA2/HAS1/HSP90AB1/COL28A1/CYR61/ITGA7/ITGB2/ITGB7/KDR/LAMA3/LCP1/LOX/LTBP1/SMA D3/MF12/PLEC/CSGALNACT1/SFRP2/BMP4/SOX9/TNXB/COL18A1/COL21A1/ACTN1                                                                                                                                                                                                                                                                                                                                                                                                                                                                   | 34  |
| GO:0035239 | tube morphogenesis                             | 33/901  | 355/17046  | 0.0012  | 0.02012 | 0.01582 | ADM/EGFR/ESR1/FGF10/FOXC2/SOX8/HLX/RSP02/FMN1/IGF1/KDR/HES5/SMAD3/NFATC3/LEF1/PITX2/PML/IFT122/PXN/CCL11/STRA6/SFRP2/GZF1/BMP4/SOX9/STK3/ZEB1/TG M2/TWIST1/PAX8/KDM2B/TP63/MICAL2                                                                                                                                                                                                                                                                                                                                                                                                                                                                                                 | 33  |
| GO:0001942 | hair follicle development                      | 12/901  | 82/17046   | 0.0012  | 0.02012 | 0.01582 | CDH3/APCDD1/EGFR/FGF10/GNAS/INHBA/SOX9/WNT10B/RUNX1/TP63/RUNX3/LDB2                                                                                                                                                                                                                                                                                                                                                                                                                                                                                                                                                                                                               | 12  |
| GO:0022404 | molting cycle process                          | 12/901  | 82/17046   | 0.0012  | 0.02012 | 0.01582 | CDH3/APCDD1/EGFR/FGF10/GNAS/INHBA/SOX9/WNT10B/RUNX1/TP63/RUNX3/LDB2                                                                                                                                                                                                                                                                                                                                                                                                                                                                                                                                                                                                               | 12  |
| GO:0022405 | hair cycle process                             | 12/901  | 82/17046   | 0.0012  | 0.02012 | 0.01582 | CDH3/APCDD1/EGFR/FGF10/GNAS/INHBA/SOX9/WNT10B/RUNX1/TP63/RUNX3/LDB2                                                                                                                                                                                                                                                                                                                                                                                                                                                                                                                                                                                                               | 12  |
| GO:0032940 | secretion by cell                              | 68/901  | 886/17046  | 0.00123 | 0.02046 | 0.01609 | ADCY3/TMED10/CHGA/CHI3L1/EXOC3/CIDEA/CCR1/ADM/CTGF/ABAT/DRD4/A2M/UNC13D/FGA/FGF10/EXPH5/STEAP2/GLS2/VPS4A/GNAS/GPER1/FFAR2/SCG3/HLA-E/IGF1/IGF2/IL1RN/IL6/INHBA/ISL1/LGALS9/LLGL1/NOV/PARK2/PDE4C/PIK3CG/PML/TLR9/TREM1/POMC/GOLPH3L/TRPV6/SMPD3/SYBU/PRKAR1B/TRIM27/EXOC4/SCT/NOD2/V PS33A/SLC6A12/VAMP2/TWIST1/CCR2/TNFRSF4/CACNA1E/PAX8/RAB7A/RAB11FIP1/NR0B2/MON1A/SCIN/IRS2/ACTN1/SYT7/RSAD2/ADIPOQ/RAB3D                                                                                                                                                                                                                                                                    | 68  |
| GO:0043062 | extracellular structure organization           | 34/901  | 370/17046  | 0.00124 | 0.02069 | 0.01627 | B4GALT7/COL9A3/COL11A1/COMP/EGFLAM/CTGF/A2M/FGA/FOXC2/BMP10/ANXA2/HAS1/HSP90AB1/COL28A1/CYR61/ITGA7/ITGB2/ITGB7/KDR/LAMA3/LCP1/LOX/LTBP1/SMA D3/MF12/PLEC/CSGALNACT1/SFRP2/BMP4/SOX9/TNXB/COL18A1/COL21A1/ACTN1                                                                                                                                                                                                                                                                                                                                                                                                                                                                   | 34  |
| GO:0035518 | histone H2A monoubiquitination                 | 4/901   | 10/17046   | 0.00126 | 0.02085 | 0.0164  | DDB1/RNF168/RYPB/KDM2B                                                                                                                                                                                                                                                                                                                                                                                                                                                                                                                                                                                                                                                            | 4   |
| GO:0072173 | metanephric tubule morphogenesis               | 4/901   | 10/17046   | 0.00126 | 0.02085 | 0.0164  | SOX8/HES5/SOX9/PAX8                                                                                                                                                                                                                                                                                                                                                                                                                                                                                                                                                                                                                                                               | 4   |
| GO:0018149 | peptide cross-linking                          | 9/901   | 51/17046   | 0.00127 | 0.0209  | 0.01644 | EGFLAM/CSTA/LCE2B/LCE1C/LCE1D/LCE2D/IVL/SPOCK3/TGM2                                                                                                                                                                                                                                                                                                                                                                                                                                                                                                                                                                                                                               | 9   |
| GO:0050926 | regulation of positive chemotaxis              | 6/901   | 24/17046   | 0.00127 | 0.0209  | 0.01644 | CDH13/FGF10/IL16/KDR/SMAD3/NTF3                                                                                                                                                                                                                                                                                                                                                                                                                                                                                                                                                                                                                                                   | 6   |

|            |                                              |         |            |         |         |         |                                                                                                                                                                                                                                                                                                                                                                                                                                                                                                                                                                                                                                                                                                                                                                                                                                                                                                                                                                                                                                                                                                                                                                                                                                                                                                                                                                                                                                                                                                                                                                                                                                                                                                                                                                                                                                                                                                                                                                                                                                                                                                                                           |     |
|------------|----------------------------------------------|---------|------------|---------|---------|---------|-------------------------------------------------------------------------------------------------------------------------------------------------------------------------------------------------------------------------------------------------------------------------------------------------------------------------------------------------------------------------------------------------------------------------------------------------------------------------------------------------------------------------------------------------------------------------------------------------------------------------------------------------------------------------------------------------------------------------------------------------------------------------------------------------------------------------------------------------------------------------------------------------------------------------------------------------------------------------------------------------------------------------------------------------------------------------------------------------------------------------------------------------------------------------------------------------------------------------------------------------------------------------------------------------------------------------------------------------------------------------------------------------------------------------------------------------------------------------------------------------------------------------------------------------------------------------------------------------------------------------------------------------------------------------------------------------------------------------------------------------------------------------------------------------------------------------------------------------------------------------------------------------------------------------------------------------------------------------------------------------------------------------------------------------------------------------------------------------------------------------------------------|-----|
| GO:0009058 | biosynthetic process                         | 338/901 | 5595/17046 | 0.00128 | 0.02097 | 0.01649 | CDH3/GNE/ZNF783/CDH13/CDKN1C/TCIRG1/C1D/ZBTB18/MTHFS/DMRT2/CELF1/TBR1/NPFFR2/ADCY3/PNRC1/SLC27A2/HNRNPUL1/ERLUN2/PSIP1/EGLN2/B4GALT7/ACOT7/ZBE D9/CIDEA/GALNT15/MRPL52/SLC51B/NEU4/ZFP42/ADM/IL31RA/CP51/NDUF4F6/ZNF358/PARPA/B3GLCT/MGAT5B/ZNF738/CTGF/SMYD1/PPM1L/CYLD/MBOAT1/ADRB3/ESCO2/ CYP11A1/ZNF782/FITM1/ADAL/ZNF709/ZNF781/CITED4/DBB1/DDOST/RNF168/ZNF366/BHLHA15/DIO3/DNMT3A/ABAT/DPH1/DRD4/AGXT/EEF2/EGFR/EGR3/PATL2/EIF4G1/ELK 4/ENO2/ESR1/ALAS1/SP8/FGF10/FHIT/XRN2/SBNO2/TRAK1/MSRB2/FOX1/FOX2/FOXO1/AKR1B1/NUP210/NEED4L/LARP1/PUM2/RYPB/VGLL2/MTOR/GABBR1/ZNF549/ST6GAL NAC3/GATM/GBGT1/GAPDHS/SLC17A5/PABPC1/DNAJC2/AMPD2/DKK3/GLS2/AMPD3/BMP10/ZNF638/GNAS/ZNF311/PIGW/ZNF844/GPER1/EOGT/GRB10/MRPS18B/ZBTB44/GS TP1/GTF2B/BRF1/GUCY1A3/NME7/PADI1/HAS1/SOX8/NRG1/HLX/HMGA1/NR4A1/ACACB/HPCA/HOXB3/HOXC4/HOXC5/HOXC6/HOXD3/HRH1/HSD11B1/HSD17B2/ACADL/HSP90 AA1/HSP90AB1/TFAP2E/ID3/BARHL2/NME9/IGF1/IGF2/CYR61/IL6/IL16/FOXK2/INHBA/IRF1/ISL1/JUP/USP50/HILS1/KDR/ACAT1/HESS/AFF3/MUC21/LDLR/LGALS9/LHCGR/LMO2/L TB/SMAD3/MC2R/ME1/MEF2D/MEOX1/MEOX2/MGAT1/MITF/LHX8/MOCS1/MOV10/NUBP1/DRG1/NEU1/NFATC3/NFYB/NHLH2/NPPC/NTF3/OAS2/OPRL1/ATP5B/PALM/PARK2/ LEF1/PRR16/CHST15/SIRT6/GALNT7/PGAM2/PIGC/PIK3CG/PITX2/PKHD1/PKM/PLA2G2A/PLAGL1/PRKAG3/PML/RIPPLY3/RIPK4/TLR9/CYTL1/POMC/POU2AF1/BNC2/MED18/LPCA T2/BANP/PPP1CB/PIWIL2/ELP3/PRMT6/DNAJC17/ZNF532/CNOT11/VAC14/CSGALNACT1/PRKD1/MYNN/PAK3/MRAP/PRMT8/PAK6/ARNTL2/RGMA/PRDM11/TENM2/GATAD2B /METTL14/CCAR2/CREBZF/RFC2/TRIM27/RGS12/RPA3/RPL8/RPL29/SCT/MRPS14/NPAS3/NOD2/SFRP2/GZF1/SGK1/BMP4/ZNF649/BMPR1B/BRD9/ZSCAN18/SOX9/SRP68/STAT2/ STK3/SUPT6H/TAFA4B/TBP/TCEA1/TCEB2/ZEB1/TEAD3/TERF1/TL3/TLR5/TNFAIP3/TNFRSF1A/TRAFA1/TRAFF5/TWIST1/CCR2/TNFRSF4/UCP1/UPP1/VARS/WNT10B/YWHAG/ZNF7/ZN F124/ZNF177/MOGS/PAX8/FZD5/CARD14/CERS4/ZNF665/ZNF606/ZC3H12A/CPEB4/ZNF436/CALR/QTRT1/SLIRP/SCRT1/HIST1H3A/SLA2/ZNF397/NROB2/HOPX/KDM2B/LOXL3/CB X2/RAE1/GAS7/KMO/RUNX1/TP63/RUNX3/IRS2/ACTN1/FADD/TNFRSF11A/ALDH1A2/SYNN2/SPHK1/BUD31/CCNA1/LIMD1/CH25H/PIAS2/LDB2/CBAF2T2/AURKB/SDR42E1/ADIPO Q/H2AFY/MICAL2/VGLL4/NUP93/RAPGEF2/ZBTB39/LPGAT1/FGF19/NR1H4 | 338 |
| GO:0001932 | regulation of protein phosphorylation        | 91/901  | 1258/17046 | 0.00128 | 0.02097 | 0.01649 | ABI1/CDKN1C/NPFFR2/ADCY3/CHI3L1/CCR1/MAP3K8/IL31RA/CTGF/ADRB3/NLRP6/DRD4/EGFR/EPHA1/FGA/FGF10/RASA3/PPM1E/FOXO1/MAPK8IP2/MTOR/FGF22/NPTN/BMP1 0/GPER1/DOK7/GSTP1/ANXA2/NRG1/HSP90AB1/IGF1/IGF2/CYR61/IL1RN/IL6/INHBA/ISL1/ITGB2/KDR/HESS/LCK/LGALS9/SMAD3/MAP3K1/NRAS/NTF3/OPRL1/PARK2/ANGPT4/PI K3CG/PKHD1/PLA2G2A/PML/TLR9/ELP3/PRKAR1B/PRKD1/MAPK3/MAP2K2/PSMB4/PAK6/PSMD7/PXN/RASGRF2/TRIM27/CCL11/CCL17/NOD2/SFRP2/BMP4/SOX9/STK3/STK10/T NFAIP3/TNFRSF1A/TNKB/TWIST1/TNFRSF4/YWHAG/CXCR4/FZD5/CARD14/CDK10/IRS2/TNFRSF11A/SPHK1/MAP3K6/ADIPOQ/H2AFY/RAPGEF2/FGF19                                                                                                                                                                                                                                                                                                                                                                                                                                                                                                                                                                                                                                                                                                                                                                                                                                                                                                                                                                                                                                                                                                                                                                                                                                                                                                                                                                                                                                                                                                                                                                   | 91  |
| GO:0043408 | regulation of MAPK cascade                   | 58/901  | 731/17046  | 0.00129 | 0.02112 | 0.0166  | NPFFR2/CHI3L1/CCR1/MAP3K8/CTGF/ADRB3/NLRP6/DRD4/EGFR/FGA/FGF10/RASA3/FOXO1/MAPK8IP2/FGF22/BMP10/GPER1/GSTP1/NRG1/IGF1/IGF2/CYR61/IL1RN/IL6/INHBA/ KDR/LGALS9/MAP3K1/NRAS/NTF3/PARK2/PIK3CG/PKHD1/PLA2G2A/TLR9/MAPK3/MAP2K2/PSMB4/PAK6/PSMD7/PXN/RASGRF2/CCL11/CCL17/NOD2/SFRP2/BMP4/STK3/TNKB/C XCR4/FZD5/CDK10/IRS2/TNFRSF11A/MAP3K6/ADIPOQ/RAPGEF2/FGF19                                                                                                                                                                                                                                                                                                                                                                                                                                                                                                                                                                                                                                                                                                                                                                                                                                                                                                                                                                                                                                                                                                                                                                                                                                                                                                                                                                                                                                                                                                                                                                                                                                                                                                                                                                                | 58  |
| GO:0045785 | positive regulation of cell adhesion         | 32/901  | 343/17046  | 0.00133 | 0.02168 | 0.01705 | CDH13/MAP3K8/EGFLAM/EGR3/UNC13D/EPHA1/FGA/FOXC2/FLOT2/MTOR/NRG1/HLA-DPA1/HLA- E/HLX/FMN1/IGF1/IGF2/CYR61/IL6/KDR/LCK/LGALS9/SMAD3/LEF1/APBB1P/NOD2/SFRP2/TGM2/CCR2/ZAP70/CALR/FADD                                                                                                                                                                                                                                                                                                                                                                                                                                                                                                                                                                                                                                                                                                                                                                                                                                                                                                                                                                                                                                                                                                                                                                                                                                                                                                                                                                                                                                                                                                                                                                                                                                                                                                                                                                                                                                                                                                                                                        | 32  |
| GO:0051234 | establishment of localization                | 265/901 | 4274/17046 | 0.00134 | 0.02168 | 0.01705 | ABI1/CDH3/TSPAN5/CDH13/KCNMB2/TCIRG1/TRDN/ABCA9/SPON2/COG5/ADCY3/TMED10/SLC27A2/RER1/CHGA/CHI3L1/PKP3/EXOC3/CHRNA1/CHRNA2/CHRNA5/CIDEA/PANX3 /RBP7/AP3S1/CLCA1/CCR1/SLC51B/C15orf27/SLC38A10/CNP/ADM/CRABP1/TRPM6/PARPA/LDLRAD3/KLC3/CTGF/ABCC13/SH3D19/CYB5E1/CYLD/TRPV3/DDOST/BHLHA15/NLRP6 /DMBT1/ABAT/DRD4/AGXT/EGFR/A2M/UNC13D/SLC10A4/FCGR2A/FGA/FGF10/RASA3/FOXO1/EXPH5/NEFASC/GGA3/FLOT2/MLC1/NUP210/ATP11A/NEED4L/SYNE1/MAPK8IP2/M TOR/SLC37A4/SAMM50/SEC31B/STEAP2/SLC17A5/GJA3/GJB2/SDCBP2/GLS2/VPS4A/GNAS/CRACR2B/GPR26/GPER1/FFAR2/GRB10/FLVCR1/GRIK4/DNAJC15/SCG3/NME7/ANXA2/ KCNIP2/NRG1/ANXA6/HK1/ANXA13/HLA- E/ACACB/HPCA/APBA2/HSPA1L/HSP90AA1/HSP90AB1/HTR3A/IGF1/IGF2/IL1RN/IL6/AQP2/AQP5/INHBA/AQP9/ISL1/JUP/ATP9B/KCNH2/KCNJ8/KCNJ9/KCNMB1/IPO5/INSC/TOM M20L/SLC6A17/LCK/LCP1/LDLR/LGALS9/LLGL1/LMNA/RAB19/SMAD3/MCC/MFI2/ASGR1/ATP1A2/NFATC3/NOV/NRAS/NTF3/OPRL1/SLC22A18/P2RY6/ATP5B/ANO7/PALM/PARK2 /PDE4C/PCYOX1/C11orf73/SIRT6/ATP8A2/PIK3CG/LRP1B/PRKAG3/PML/FXYD6/SLCO1C1/PNPL1/TLR9/TREM1/POMC/PON1/RIN2/ZDHC13/DNAJC17/GOLPH3/SLC47A1/SLC29A3 /TRPV6/SMPD3/SLC30A10/CHRNA9/SYBU/PEX26/PRKAR1B/IFT122/LMBRD1/PRKD1/APOBR/MAPK3/MAP2K2/TRPV5/MASP1/CDC42SE1/TRPC7/RASGRF2/TRIM27/EXOC4/RPL8/R PL29/S100A6/SCT/NOD2/TINAGL1/STRA6/SFRP2/SGK1/VPS33A/BMP4/SLC4A1/ZG16/SLC6A12/SLC8A1/SLC9A3/SLC20A2/SUT1/SRP68/SUPT6H/BST2/VAMP2/TGM2/TRAPPC10/T NFAIP3/TNFRSF1A/TRPC4/TRPC6/TRPM2/TWIST1/CCR2/TNFRSF4/UCP1/YWHAG/CA7/CACNA1E/CACNB2/PAX8/FZD5/RAB7A/RAB11FIP1/CALR/UNC93B1/COLQ/DYNLRB2/SLC25A 18/MFSD7/ATP13A4/NROB2/MON1A/CASQ1/LOXL3/MGARP/RAE1/SLC43A1/SCIN/SERPINA6/IRS2/ACTN1/TNFRSF11A/SPHK1/ENDOU/SY77/SLC16A3/RSAD2/SMDT1/REEP6/TRIP1 0/ADIPOQ/RAB3D/H2AFY/RAB36/NUP93/USP6NL/FGF19/NR1H4                                                                                                                                                                                                                                                                                                                                                                                                           | 265 |
| GO:0002764 | immune response-regulating signaling pathway | 49/901  | 594/17046  | 0.00135 | 0.02186 | 0.01719 | ABI1/TANK/MAP3K8/CYLD/NLRP6/DMBT1/EGFR/FCGR2A/FGF10/RASA3/FOXO1/PUM2/MTOR/FGF22/FFAR2/NRG1/HLA- DPA1/NR4A1/HSP90AA1/HSP90AB1/IRF1/ITGB2/LCK/MAP3K1/MOV10/NFATC3/NRAS/IL20RB/TLR9/PAG1/MAPK3/MAP2K2/PSMB4/PSMD7/RASGRF2/NOD2/TLR5/TNFAIP3/ZAP7 0/NLRX1/UNC93B1/SLA2/IRS2/FADD/SKAP2/RSAD2/RAPGEF2/CD79A/FGF19                                                                                                                                                                                                                                                                                                                                                                                                                                                                                                                                                                                                                                                                                                                                                                                                                                                                                                                                                                                                                                                                                                                                                                                                                                                                                                                                                                                                                                                                                                                                                                                                                                                                                                                                                                                                                              | 49  |
| GO:0080134 | regulation of response to stress             | 95/901  | 1326/17046 | 0.00136 | 0.02186 | 0.01719 | TANK/MAP3K8/CTGF/CYLD/RNF168/COCH/NLRP6/DMBT1/EGFR/A2M/F11/FGA/FGF10/VASH1/SBNO2/ACIN1/FOXC2/FOXO1/MLC1/NUP210/LARP1/PUM2/MAPK8IP2/MTOR/SLC 37A4/DNAJC2/BMP10/GPER1/FFAR2/GSTP1/ANXA2/HK1/HLA-B/HLA- E/HMGA1/HSPA1L/HSP90AA1/HSP90AB1/L1R1/IL1RN/IL6/IRF1/ISL1/ITGB2/LCK/LGALS9/SMAD3/MAP3K1/NFATC3/NOV/NRAS/PARK2/C11orf73/SIRT6/PIK3CG/PLA2G2A/PML/IL2 0RB/TLR9/TREM1/MAPK3/MAP2K2/PROC/MASP1/HTRA1/PSMB4/PSMD7/CCAR2/RPA3/NOD2/SFRP2/STAT2/STK3/TLR5/TNFAIP3/TNFRSF1A/TNKB/TWIST1/CCR2/CA7/FZD5/RAB 7A/NLRX1/UNC93B1/HIST1H3A/HOPX/RAE1/TP63/FADD/TNFRSF11A/MAP3K6/RSAD2/ADIPOQ/NUP93/FGF19                                                                                                                                                                                                                                                                                                                                                                                                                                                                                                                                                                                                                                                                                                                                                                                                                                                                                                                                                                                                                                                                                                                                                                                                                                                                                                                                                                                                                                                                                                                                            | 95  |

|            |                                                              |         |            |         |         |         |                                                                                                                                                                                                                                                                                                                                                                                                                                                                                                                                                                                                                                                                                                                                                                                                                                                                                                                                                                                                                                                                                                                                                                                                                                                                                                                                                                                                                            |     |
|------------|--------------------------------------------------------------|---------|------------|---------|---------|---------|----------------------------------------------------------------------------------------------------------------------------------------------------------------------------------------------------------------------------------------------------------------------------------------------------------------------------------------------------------------------------------------------------------------------------------------------------------------------------------------------------------------------------------------------------------------------------------------------------------------------------------------------------------------------------------------------------------------------------------------------------------------------------------------------------------------------------------------------------------------------------------------------------------------------------------------------------------------------------------------------------------------------------------------------------------------------------------------------------------------------------------------------------------------------------------------------------------------------------------------------------------------------------------------------------------------------------------------------------------------------------------------------------------------------------|-----|
| GO:0009266 | response to temperature stimulus                             | 22/901  | 206/17046  | 0.00136 | 0.02186 | 0.01719 | PSIP1/ADM/ADRB3/TRPV3/FOXO1/NUP210/MTOR/ACOT11/DNAJC2/HSPA1L/HSP90AA1/HSP90AB1/IGF1/IL1R1/IL6/C11orf73/MAPK3/CCAR2/RPA3/CASQ1/RAE1/NUP93                                                                                                                                                                                                                                                                                                                                                                                                                                                                                                                                                                                                                                                                                                                                                                                                                                                                                                                                                                                                                                                                                                                                                                                                                                                                                   | 22  |
| GO:1901564 | organonitrogen compound metabolic process                    | 135/901 | 1996/17046 | 0.00137 | 0.02203 | 0.01732 | BCKDK/TCIRG1/MTHFS/CELF1/NPFFR2/ADCY3/TMED10/HIBADH/EGLN2/B4GALT7/ACOT7/CLN5/MRPL52/APOA1BP/NEU4/ADM/EGFLAM/CPS1/PPM1L/MBOAT1/ADRB3/ADAL/DOST/DIO3/DLG2/DNMT3A/ABAT/DRD4/ECE1/AGXT/EEF2/PATL2/EIF4G1/ENO2/ALAS1/FAH/FHIT/AKR1B1/LARP1/PUM2/MTOR/FUCA1/GABBR1/ST6GALNAC3/PNKD/GATM/GAPDHS/PABPC1/AMPD2/PDE7B/GLS2/AMPD3/GNAS/GPER1/MRPS18B/DNAJC15/GSTP1/GUCY1A3/NME7/PADI1/HAS1/HK1/ACACB/HPCA/ACADL/BARHL2/NME9/IGF1/CYR61/IL6/ITIH3/ITIH4/ACAT1/LDLR/LHCGR/MC2R/ME1/ME2/MOCS1/NUDT1/MYH4/NDUFB4/NEU1/ATP1A2/NPPC/OAS2/OPRL1/ATP5B/PALM/PARK2/SPOCK3/PRR16/CHST15/PDE4C/PCYOX1/PDE7A/SIRT6/PDE6B/PGAM2/PKM/PLA2G2A/PML/CYTL1/POMC/PON1/LPCAT2/PIWIL2/SMPD3/CNOT11/LMBRD1/CSGALNACT1/PRKD1/MAPK3/MRAP/PSMB4/PSMD7/METTL14/RPL8/RPL29/SCT/MRPS14/NOD2/CERK/SRP68/CCR2/UPP1/VARS/PAX8/CERS4/CPEB4/CALR/QTRT1/KMO/SPHK1/NR1H4                                                                                                                                                                                                                                                                                                                                                                                                                                                                                                                                                                                                 | 135 |
| GO:0097191 | extrinsic apoptotic signaling pathway                        | 23/901  | 220/17046  | 0.00142 | 0.02276 | 0.0179  | CYLD/FGA/FGF10/GPER1/GSTP1/NRG1/IGF1/INHBA/LMNA/SMAD3/DDX47/PML/SFRP2/BMPR1B/BOK/STK3/TNFAIP3/TNFRSF1A/TRAF1/BCL2L14/RUNX3/CRADD/FADD                                                                                                                                                                                                                                                                                                                                                                                                                                                                                                                                                                                                                                                                                                                                                                                                                                                                                                                                                                                                                                                                                                                                                                                                                                                                                      | 23  |
| GO:0009615 | response to virus                                            | 34/901  | 373/17046  | 0.00142 | 0.02276 | 0.0179  | SPON2/HNRNPUL1/DMBT1/UNC13D/ACIN1/PUM2/SLC37A4/HMGA1/IL6/IRF1/KCNJ8/STMN1/LCK/LGALS9/OAS2/PML/TREM1/HTRA1/CREBZF/ACTA2/CCL11/STAT2/BST2/TNFAIP3/CA7/CXCR4/NLRX1/UNC93B1/HIST1H3A/IFITM1/FADD/RSAD2/CD8A/NUP93                                                                                                                                                                                                                                                                                                                                                                                                                                                                                                                                                                                                                                                                                                                                                                                                                                                                                                                                                                                                                                                                                                                                                                                                              | 34  |
| GO:0048729 | tissue morphogenesis                                         | 48/901  | 581/17046  | 0.00146 | 0.02318 | 0.01822 | COL11A1/ADM/EGFR/ESR1/FGF10/FOXL1/FOXC2/BMP10/SOX8/NRG1/RPO2/FMN1/IGF1/CYR61/IL6/INHBA/ISL1/KDR/HES5/SMAD3/MYL2/NFATC3/LEF1/SIRT6/ATP8A2/PITX2/PML/RIPK4/IFT122/PXN/ACTA2/CCL11/SFRP2/GZF1/BMP4/SOX9/STK3/ACTC1/TGM2/TWIST1/PAX8/FZD5/KDM2B/RUNX1/TP63/RUNX3/ALDH1A2/MICAL2                                                                                                                                                                                                                                                                                                                                                                                                                                                                                                                                                                                                                                                                                                                                                                                                                                                                                                                                                                                                                                                                                                                                                | 48  |
| GO:0032760 | positive regulation of tumor necrosis factor production      | 9/901   | 52/17046   | 0.00146 | 0.02318 | 0.01822 | SPON2/HLA-E/ISL1/LGALS9/TLR9/NOD2/TWIST1/CCR2/FADD                                                                                                                                                                                                                                                                                                                                                                                                                                                                                                                                                                                                                                                                                                                                                                                                                                                                                                                                                                                                                                                                                                                                                                                                                                                                                                                                                                         | 9   |
| GO:2001238 | positive regulation of extrinsic apoptotic signaling pathway | 9/901   | 52/17046   | 0.00146 | 0.02318 | 0.01822 | CYLD/GPER1/INHBA/PML/BMPR1B/STK3/BCL2L14/RUNX3/FADD                                                                                                                                                                                                                                                                                                                                                                                                                                                                                                                                                                                                                                                                                                                                                                                                                                                                                                                                                                                                                                                                                                                                                                                                                                                                                                                                                                        | 9   |
| GO:0019637 | organophosphate metabolic process                            | 75/901  | 1004/17046 | 0.00147 | 0.02318 | 0.01822 | GNE/TCIRG1/NPFFR2/ADCY3/ACOT7/CNP/APOA1BP/ADM/CPS1/MBOAT1/ADRB3/FITM1/ADAL/DLG2/DRD4/ENO2/FHIT/GABBR1/GAPDHS/AMPD2/PDE7B/AMPD3/GNAS/PIGW/THEM5/GPER1/DNAJC15/GUCY1A3/NME7/HK1/ACACB/HPCA/HRH1/NME9/IGF1/INPP5A/LDLR/LHCGR/MC2R/ME1/ME2/MGAT1/MOCS1/NUDT1/MYH4/NDUFB4/ATP1A2/NPPC/OAS2/OPRL1/ATP5B/PALM/PDE4C/PDE7A/SIRT6/PDE6B/PGAM2/PIGC/PIK3CG/PKM/PLA2G2A/PON1/LPCAT2/SMPD3/VAC14/CSGALNACT1/MRAP/SCT/NOD2/CCR2/UPP1/KMO/SYNJ2/ENTPD3/LPGAT1                                                                                                                                                                                                                                                                                                                                                                                                                                                                                                                                                                                                                                                                                                                                                                                                                                                                                                                                                                            | 75  |
| GO:0098773 | skin epidermis development                                   | 12/901  | 84/17046   | 0.00149 | 0.02337 | 0.01837 | CDH3/APCDD1/EGFR/FGF10/GNAS/INHBA/SOX9/WNT10B/RUNX1/TP63/RUNX3/LDB2                                                                                                                                                                                                                                                                                                                                                                                                                                                                                                                                                                                                                                                                                                                                                                                                                                                                                                                                                                                                                                                                                                                                                                                                                                                                                                                                                        | 12  |
| GO:0060337 | type I interferon signaling pathway                          | 11/901  | 73/17046   | 0.00149 | 0.02337 | 0.01837 | HLA-B/HLA-E/HLA-F/HSP90AB1/IRF1/OAS2/STAT2/BST2/IFITM1/FADD/RSAD2                                                                                                                                                                                                                                                                                                                                                                                                                                                                                                                                                                                                                                                                                                                                                                                                                                                                                                                                                                                                                                                                                                                                                                                                                                                                                                                                                          | 11  |
| GO:0071357 | cellular response to type I interferon                       | 11/901  | 73/17046   | 0.00149 | 0.02337 | 0.01837 | HLA-B/HLA-E/HLA-F/HSP90AB1/IRF1/OAS2/STAT2/BST2/IFITM1/FADD/RSAD2                                                                                                                                                                                                                                                                                                                                                                                                                                                                                                                                                                                                                                                                                                                                                                                                                                                                                                                                                                                                                                                                                                                                                                                                                                                                                                                                                          | 11  |
| GO:0010556 | regulation of macromolecule biosynthetic process             | 228/901 | 3621/17046 | 0.0015  | 0.0234  | 0.0184  | ZNF783/CDH13/CDKN1C/C1D/ZBTB18/DMRT2/CELF1/TBR1/PNRC1/HNRNPUL1/ERLIN2/PSIP1/EGLN2/ZBED9/CIDEA/SLC51B/ZFP42/IL31RA/ZNF358/ZNF738/CTGF/SMYD1/CYLD/ESCO2/ZNF782/ZNF709/ZNF781/CITED4/RNF168/ZNF366/BHLHA15/DNMT3A/EEF2/EGFR/EGR3/PATL2/EIF4G1/ELK4/ESR1/SP8/FGF10/FHIT/XRN2/SBNO2/TRAK1/MSRB2/FOXL1/FOXO2/FOXO1/SPG20/NEDD4L/LARP1/PUM2/RYPB/VGLL2/MTOR/ZNF549/PABPC1/DNAJC2/DKK3/BMP10/ZNF638/ZNF311/ZNF844/GPER1/GRB10/ZBTB44/GSTP1/GTF2B/BRF1/SOX8/NRG1/HLX/HMGA1/NR4A1/HOXB3/HOXC4/HOXC5/HOXC6/HOXD3/TFAP2E/ID3/BARHL2/IGF1/IGF2/CYR61/IL6/IL16/FOXK2/INHBA/IRF1/ISL1/JUP/USP50/HILS1/KDR/HES5/AF3/LGALS9/LMNA/LMO2/LTB/SMAD3/MEF2D/MEOX1/MEOX2/MITF/LHX8/MOV10/NFATC3/NFYB/NHLH2/NTF3/PARK2/LEF1/PRR16/SIRT6/PITX2/PKHD1/PLAGL1/PML/RIPPLY3/RIPK4/TLR9/CYTL1/POMC/POU2AF1/BNC2/MED18/BANP/PPP1CB/PIWIL2/ELP3/PRMT6/DNAJC17/ZNF532/CNOT11/PRKD1/MYNN/MAPK3/PRMT8/HTRA1/PAK6/ARNTL2/RGMA/PRDM11/TENM2/GATAD2B/METTL14/CCAR2/CREBZF/TRIM27/NPAS3/NOD2/SFRP2/GZF1/SGK1/BMP4/ZNF649/BMPR1B/BRD9/ZSCAN18/SOX9/STAT2/STK3/SUPT6H/TAFA4B/TBP/TCEA1/TCFB2/ZEB1/TEAD3/TERF1/TLE3/TNFAIP3/TNFRSF1A/TRAF1/TRA5/TWIST1/CCR2/TNFRSF4/UCP1/VARS/WNT10B/ZNF7/ZNF124/ZNF177/PAX8/FZD5/CARD14/ZNF665/ZNF606/ZC3H12A/CPEB4/ZNF436/CALR/SLIRP/SCRT1/HIST1H3A/SLA2/ZNF397/NROB2/HOPX/KDM2B/LOXL3/CBX2/GAS7/RUNX1/TP63/RUNX3/IRS2/ACTN1/FADD/TNFRSF11A/SPHK1/BUD31/CCNA1/LIMD1/PIAS2/LDB2/CBFA2T2/AURKB/ADIPOQ/H2AFY/MICAL2/VGLL4/ZBTB39/NR1H4 | 228 |

|            |                                                |         |            |         |         |         |                                                                                                                                                                                                                                                                                                                                                                                                                                                                                                                                                                                                                                                                                                                                                                                                                                                                                                                                                                                                                                                                                                                                                                                                                                                                                                                                                                                                                                                                                                                                                                                                                                                                                                                                                                                                                                                                                                                                                                                                                                                                                                                  |     |
|------------|------------------------------------------------|---------|------------|---------|---------|---------|------------------------------------------------------------------------------------------------------------------------------------------------------------------------------------------------------------------------------------------------------------------------------------------------------------------------------------------------------------------------------------------------------------------------------------------------------------------------------------------------------------------------------------------------------------------------------------------------------------------------------------------------------------------------------------------------------------------------------------------------------------------------------------------------------------------------------------------------------------------------------------------------------------------------------------------------------------------------------------------------------------------------------------------------------------------------------------------------------------------------------------------------------------------------------------------------------------------------------------------------------------------------------------------------------------------------------------------------------------------------------------------------------------------------------------------------------------------------------------------------------------------------------------------------------------------------------------------------------------------------------------------------------------------------------------------------------------------------------------------------------------------------------------------------------------------------------------------------------------------------------------------------------------------------------------------------------------------------------------------------------------------------------------------------------------------------------------------------------------------|-----|
| GO:0009892 | negative regulation of metabolic process       | 159/901 | 2412/17046 | 0.0015  | 0.02341 | 0.01841 | FARP1/CDKN1C/C1D/ZBTB18/CELF1/ERLIN2/CARD16/CIDEA/CCR1/CSTA/CTGF/SMYD1/CYLD/RNF168/ZNF366/NLRP6/DLG2/DNMT3A/DRD4/EGFR/PATL2/A2M/ELK4/EPHA1/ESR1/PHACTR1/FGA/FHIT/PPM1E/SBNO2/ACIN1/FOXO2/FOXO1/DIP2A/FLOT2/NEDD4L/PUM2/RYPB/MTOR/GABBR1/PABPC1/DNAJC2/DKK3/GPER1/GRB10/DNAJC15/GSTP1/GZMA/A<br>NXA2/SERPIND1/SOX8/NRG1/HMGA1/ACACB/HPCA/HOXB3/HOXC6/ACADL/HSP90AB1/ID3/COL28A1/IGF1/IL6/INHBA/IRF1/ISL1/ITIH3/ITIH4/HILS1/KIF25/IPO5/HESS/LGALS9/SM<br>AD3/MITF/MOV10/NPPC/NTF3/OPRL1/PALM/PARK2/SPOCK3/LEF1/SIRT6/PI3/PIK3CG/PITX2/PKHD1/PML/RIPPLY3/TLR9/BANP/PIWIL2/PRMT6/DNAJC17/CNOT11/PRKAR1B/MAP<br>2K2/MASP1/CDC42SE1/PSMB4/PSMD7/TENM2/GATAD2B/METTL14/CCAR2/CREBZF/TRIM27/NOD2/SFRP2/GZF1/BMP4/ZNF649/SOX9/SUPT6H/BST2/TBP/ZEB1/TERF1/TIMP3/TN<br>FAIP3/TWIST1/CCR2/TNFRSF4/WNT10B/YWHAG/ZNF177/ZC3H14/ZC3H12A/CPEB4/CALR/SLIRP/CAST/SCRT1/HIST1H3A/SLA2/NROB2/HOPX/SPINK7/KDM2B/LOXL3/CBX2/TP63/R<br>UNX3/SERPINA6/IRS2/FADD/LIMD1/ERI1/PIAS2/CBFA2T2/AURKB/DAPL1/ADIPOQ/H2AFY/N4BP1/RAPGEF2/FGF19/NR1H4                                                                                                                                                                                                                                                                                                                                                                                                                                                                                                                                                                                                                                                                                                                                                                                                                                                                                                                                                                                                                                                                                              | 159 |
| GO:0044249 | cellular biosynthetic process                  | 328/901 | 5425/17046 | 0.00151 | 0.02347 | 0.01846 | CDH3/GNE/ZNF783/CDH13/CDKN1C/TCIRG1/C1D/ZBTB18/MTHFS/DMRT2/CELF1/TBR1/NPFFR2/ADCY3/PNRC1/SLC27A2/HNRPUL1/ERLIN2/PSIP1/EGLN2/B4GALT7/ACOT7/ZBE<br>D9/CIDEA/GALNT15/MRPL52/SLC51B/NEU4/ZFP42/ADM/IL31RA/CP51/ZNF358/PARP4/B3GLCT/MGAT5B/ZNF738/CTGF/SMYD1/PPM1L/CYLD/MBOAT1/ADRB3/ESCO2/CYP11A1/<br>ZNF782/FITM1/ADAL/ZNF709/ZNF781/CITED4/DBB1/DDOST/RNF168/ZNF366/BHLHA15/DNMT3A/ABAT/DPH1/DRD4/AGXT/EEF2/EGFR/EGR3/PATL2/EIF4G1/ELK4/ESR1/ALAS1/S<br>P8/FGF10/FHIT/XRN2/SBNO2/TRAK1/MSRB2/FOXO1/FOXO2/FOXO1/AKR1B1/NUP210/NEDD4L/LARP1/PUM2/RYPB/VGLL2/MTOR/GABBR1/ZNF549/ST6GALNAC3/GATM/GBGT1/S<br>LC17A5/PABPC1/DNAJC2/AMPD2/DKK3/GLS2/AMPD3/BMP10/ZNF638/GNAS/ZNF311/PIGW/ZNF844/GPER1/EOGT/GRB10/MRPS18B/ZBTB44/GSTP1/GTF2B/BRF1/GUCY1A3/NM<br>E7/PADI1/HAS1/SOX8/NRG1/HLX/HMGA1/NR4A1/ACACB/HPCA/HOXB3/HOXC4/HOXC5/HOXC6/HOXD3/HRH1/ACADL/HSP90AA1/HSP90AB1/TFAP2E/ID3/BARHL2/NME9/IGF1/IG<br>F2/CYR61/IL6/IL16/FOXK2/INHBA/IRF1/ISL1/JUP/USP50/HILS1/ACAT1/HESS/AFF3/MUC21/LDLR/LGALS9/LHCGR/LMO2/LTB/SMAD3/MC2R/ME1/MEF2D/MEOX1/MEOX2/MGAT1/<br>MITF/LHX8/MOCS1/MOV10/DRG1/NEU1/NFATC3/NFYB/NHLH2/NPPC/NTF3/OAS2/OPRL1/ATP5B/PALM/PARK2/LEF1/PRR16/CHST15/SIRT6/GALNT7/PIGC/PIK3CG/PITX2/PKHD1/<br>PKM/PLA2G2A/PLAGL1/PRKAG3/PML/RIPPLY3/RIPK4/TLR9/CYTL1/POMC/POU2AF1/BNC2/MED18/LPCAT2/BANP/PPP1CB/PIWIL2/ELP3/PRMT6/DNAJC17/ZNF532/CNOT11/VAC1<br>4/CSGALNACT1/PRKD1/MYNN/MAPK3/MRAP/PRMT8/PAK6/ARNTL2/RGMA/PRDM11/TENM2/GATAD2B/METTL14/CCAR2/CREBZF/RFC2/TRIM27/RGS12/RPA3/RPL8/RPL29/SCT/<br>MRPS14/NPAS3/NOD2/SFRP2/GZF1/SGK1/BMP4/ZNF649/BMPR1B/BRD9/ZSCAN18/SOX9/SRP68/STAT2/STK3/SUPT6H/TAF4B/TBP/TCEA1/TCEB2/ZEB1/TEAD3/TERF1/TLE3/TLR5/<br>TNFAIP3/TNFRSF1A/TRAFF1/TRAFF5/TWIST1/CCR2/TNFRSF4/UCP1/UPP1/VARS/WNT10B/YWHAG/ZNF7/ZNF124/ZNF177/MOGS/PAX8/FZD5/CARD14/CERS4/ZNF665/ZNF606/ZC3H<br>12A/CPEB4/ZNF436/CALR/QTRT1/SLIRP/SCRT1/HIST1H3A/SLA2/ZNF397/NROB2/HOPX/KDM2B/LOXL3/CBX2/RAE1/GAS7/KMO/RUNX1/TP63/RUNX3/IRS2/ACTN1/FADD/TNFRSF11<br>A/ALDH1A2/SYNJ2/SPHK1/BUD31/CCNA1/LIMD1/CH25H/PIAS2/LDB2/CBFA2T2/AURKB/ADIPOQ/H2AFY/MICAL2/VGLL4/NUP93/RAPGEF2/ZBTB39/LPGAT1/FGF19/NR1H4 | 328 |
| GO:0048754 | branching morphogenesis of an epithelial tube  | 18/901  | 156/17046  | 0.00152 | 0.02352 | 0.0185  | ESR1/FGF10/FOXO2/SOX8/RSPO2/IGF1/KDR/NFATC3/LEF1/PITX2/PML/PXN/CCL11/SFRP2/GZF1/BMP4/SOX9/PAX8                                                                                                                                                                                                                                                                                                                                                                                                                                                                                                                                                                                                                                                                                                                                                                                                                                                                                                                                                                                                                                                                                                                                                                                                                                                                                                                                                                                                                                                                                                                                                                                                                                                                                                                                                                                                                                                                                                                                                                                                                   | 18  |
| GO:0002221 | pattern recognition receptor signaling pathway | 19/901  | 169/17046  | 0.00155 | 0.02395 | 0.01883 | TANK/MAP3K8/CYLD/NLRP6/DMBT1/PUM2/FFAR2/IRF1/ITGB2/MAP3K1/TLR9/MAPK3/NOD2/TLR5/TNFAIP3/NLRX1/UNC93B1/FADD/RSAD2                                                                                                                                                                                                                                                                                                                                                                                                                                                                                                                                                                                                                                                                                                                                                                                                                                                                                                                                                                                                                                                                                                                                                                                                                                                                                                                                                                                                                                                                                                                                                                                                                                                                                                                                                                                                                                                                                                                                                                                                  | 19  |
| GO:0072273 | metanephric nephron morphogenesis              | 6/901   | 25/17046   | 0.0016  | 0.02465 | 0.01938 | SOX8/FMN1/HESS/BMP4/SOX9/PAX8                                                                                                                                                                                                                                                                                                                                                                                                                                                                                                                                                                                                                                                                                                                                                                                                                                                                                                                                                                                                                                                                                                                                                                                                                                                                                                                                                                                                                                                                                                                                                                                                                                                                                                                                                                                                                                                                                                                                                                                                                                                                                    | 6   |
| GO:0051249 | regulation of lymphocyte activation            | 32/901  | 347/17046  | 0.00161 | 0.02478 | 0.01949 | MAP3K8/CYLD/EGR3/FGF10/FLOT2/MTOR/HLA-DOA/HLA-DPA1/HLA-<br>E/HLX/ZC3H12D/IGF1/IGF2/IL6/INHBA/IRF1/LCK/LGALS9/IL20RB/PAG1/NOD2/BMP4/SUPT6H/ZEB1/TNFAIP3/CCR2/TNFRSF4/ZAP70/LST1/SLA2/IRS2/FADD                                                                                                                                                                                                                                                                                                                                                                                                                                                                                                                                                                                                                                                                                                                                                                                                                                                                                                                                                                                                                                                                                                                                                                                                                                                                                                                                                                                                                                                                                                                                                                                                                                                                                                                                                                                                                                                                                                                    | 32  |
| GO:0030500 | regulation of bone mineralization              | 10/901  | 63/17046   | 0.00162 | 0.0248  | 0.0195  | CCR1/FAM101A/SMAD3/BGLAP/BMP4/SLC8A1/BMPR1B/SOX9/TWIST1/WNT10B                                                                                                                                                                                                                                                                                                                                                                                                                                                                                                                                                                                                                                                                                                                                                                                                                                                                                                                                                                                                                                                                                                                                                                                                                                                                                                                                                                                                                                                                                                                                                                                                                                                                                                                                                                                                                                                                                                                                                                                                                                                   | 10  |
| GO:0050880 | regulation of blood vessel size                | 16/901  | 132/17046  | 0.00162 | 0.02487 | 0.01956 | KCNMB2/MRVI1/ADM/CP51/ADRB3/ECE1/FGA/FOXO2/GPER1/GUCY1A3/HRH1/KCNJ8/ATP1A2/NPPC/ACTA2/SLC8A1                                                                                                                                                                                                                                                                                                                                                                                                                                                                                                                                                                                                                                                                                                                                                                                                                                                                                                                                                                                                                                                                                                                                                                                                                                                                                                                                                                                                                                                                                                                                                                                                                                                                                                                                                                                                                                                                                                                                                                                                                     | 16  |
| GO:0030335 | positive regulation of cell migration          | 31/901  | 333/17046  | 0.00163 | 0.02488 | 0.01957 | CDH13/CCR1/EGFR/EPHA1/FGF10/FOXO2/GPER1/IGF1/CYR61/IL6/KDR/LGALS9/SMAD3/NTF3/P2RY6/LEF1/ANGPT4/ELP3/PRKD1/CCL11/BMP4/SLC8A1/SOX9/CCR2/PTP4A1/COL1<br>8A1/CALR/IRS2/FADD/SPHK1/RAPGEF2                                                                                                                                                                                                                                                                                                                                                                                                                                                                                                                                                                                                                                                                                                                                                                                                                                                                                                                                                                                                                                                                                                                                                                                                                                                                                                                                                                                                                                                                                                                                                                                                                                                                                                                                                                                                                                                                                                                            | 31  |
| GO:0060348 | bone development                               | 19/901  | 170/17046  | 0.00166 | 0.02527 | 0.01987 | ABI1/SLC38A10/COMP/FAM101A/GNAS/ANXA2/IGF1/MEF2D/NPPC/PITX2/BNC2/CSGALNACT1/BGLAP/SFRP2/BMP4/BMPR1B/SOX9/TWIST1/C6orf25                                                                                                                                                                                                                                                                                                                                                                                                                                                                                                                                                                                                                                                                                                                                                                                                                                                                                                                                                                                                                                                                                                                                                                                                                                                                                                                                                                                                                                                                                                                                                                                                                                                                                                                                                                                                                                                                                                                                                                                          | 19  |
| GO:0060341 | regulation of cellular localization            | 82/901  | 1122/17046 | 0.00167 | 0.0253  | 0.01989 | CDH3/TRDN/RER1/CHGA/CIDEA/SLC51B/CYLD/ABAT/DRD4/EGFR/UNC13D/FGA/EXPH5/MLC1/NEDD4L/MTOR/GLS2/VP54A/GNAS/GPR26/GPER1/FFAR2/NRG1/ANXA13/HLA-<br>E/HPCA/HSPA1L/HSP90AB1/IGF1/IL1RN/IL6/INHBA/ISL1/JUP/IPO5/LCP1/LGALS9/LLGL1/LMNA/SMAD3/ATP1A2/NOV/PARK2/PDE4C/PML/TLR9/POMC/GOLPH3L/TRPV6/SMPD3/S<br>YBU/PRKAR1B/PRKD1/MAPK3/MAP2K2/TRIM27/SCT/NOD2/SFRP2/BMP4/SLC8A1/SUPT6H/BST2/VAMP2/TWIST1/CCR2/TNFRSF4/YWHAG/CACNA1E/PAX8/FZD5/RAB7A/RAB11FI<br>P1/NROB2/CASQ1/IRS2/SPHK1/SYT7/RSAD2/REEP6/ADIPOQ/RAB3D                                                                                                                                                                                                                                                                                                                                                                                                                                                                                                                                                                                                                                                                                                                                                                                                                                                                                                                                                                                                                                                                                                                                                                                                                                                                                                                                                                                                                                                                                                                                                                                                        | 82  |

|            |                                                           |         |            |         |         |         |                                                                                                                                                                                                                                                                                                                                                                                                                                                                                                                                                                                                                                                                                                                                                                                                                                                                                                                                                                                                                                                                                                                                                                                                                                                                                                                                                                           |     |
|------------|-----------------------------------------------------------|---------|------------|---------|---------|---------|---------------------------------------------------------------------------------------------------------------------------------------------------------------------------------------------------------------------------------------------------------------------------------------------------------------------------------------------------------------------------------------------------------------------------------------------------------------------------------------------------------------------------------------------------------------------------------------------------------------------------------------------------------------------------------------------------------------------------------------------------------------------------------------------------------------------------------------------------------------------------------------------------------------------------------------------------------------------------------------------------------------------------------------------------------------------------------------------------------------------------------------------------------------------------------------------------------------------------------------------------------------------------------------------------------------------------------------------------------------------------|-----|
| GO:0034340 | response to type I interferon                             | 11/901  | 74/17046   | 0.00167 | 0.0253  | 0.01989 | HLA-B/HLA-E/HLA-F/HSP90A1/IRF1/OAS2/STAT2/BST2/IFITM1/FADD/RSAD2                                                                                                                                                                                                                                                                                                                                                                                                                                                                                                                                                                                                                                                                                                                                                                                                                                                                                                                                                                                                                                                                                                                                                                                                                                                                                                          | 11  |
| GO:0048546 | digestive tract morphogenesis                             | 9/901   | 53/17046   | 0.00168 | 0.02544 | 0.02    | EGFR/FGF10/HLX/SMAD3/PITX2/STRA6/SFRP2/BMP4/TP63                                                                                                                                                                                                                                                                                                                                                                                                                                                                                                                                                                                                                                                                                                                                                                                                                                                                                                                                                                                                                                                                                                                                                                                                                                                                                                                          | 9   |
| GO:1902105 | regulation of leukocyte differentiation                   | 23/901  | 223/17046  | 0.0017  | 0.02564 | 0.02016 | CCR1/CYLD/EGR3/ACIN1/MTOR/GNAS/HLA-B/HLA-DOA/HLX/IL6/INHBA/IRF1/LCK/LGALS9/MITF/LEF1/BGLAP/BMP4/ZEB1/ZAP70/RUNX1/FADD/ADIPOQ                                                                                                                                                                                                                                                                                                                                                                                                                                                                                                                                                                                                                                                                                                                                                                                                                                                                                                                                                                                                                                                                                                                                                                                                                                              | 23  |
| GO:2000112 | regulation of cellular macromolecule biosynthetic process | 222/901 | 3525/17046 | 0.00175 | 0.02628 | 0.02067 | ZNF783/CDH13/CDKN1C/C1D/ZBTB18/DMRT2/CELF1/TBR1/PNRC1/HNRNPUL1/ERLIN2/PSIP1/EGLN2/ZBED9/CIDEA/SLC51B/ZFP42/IL31RA/ZNF358/ZNF738/SMYD1/CYLD/ESCO2/ZNF782/ZNF709/ZNF781/CITED4/RNF168/ZNF366/BHLHA15/DNMT3A/EEF2/EGFR/EGR3/PATL2/EIF4G1/ELK4/ESR1/SP8/FGF10/FHIT/XRN2/SBNO2/TRAK1/MSRB2/FOXL1/FOXC2/FOXO1/SPG20/NEDD4L/LARP1/PUM2/RYPB/VGLL2/MTOR/ZNF549/PABPC1/DNAJC2/DKK3/BMP10/ZNF638/ZNF311/ZNF844/GPER1/GRB10/ZBTB44/GTF2B/BRF1/SOX8/NRG1/HLX/HMGA1/NR4A1/HOXB3/HOXC4/HOXC5/HOXC6/HOXC7/TFAP2E/ID3/BARHL2/IGF1/IGF2/CYR61/IL6/IL16/FOXK2/INHBA/IRF1/ISL1/JUP/USP50/HILS1/HES5/AFF3/LGALS9/LMNA/LMO2/SMAD3/MEF2D/MEOX1/MEOX2/MITF/LHX8/MOV10/NFATC3/NFYB/NHLH2/NTF3/PARK2/LEF1/PRR16/SIRT6/PITX2/PKHD1/PLAGL1/PML/RIPPLY3/RIPK4/TLR9/CYTL1/POMC/POU2AF1/BNC2/MED18/BANP/PPP1CB/PIWIL2/ELP3/PRMT6/DNAJC17/ZNF532/CNOT11/PRKD1/MYNN/PAK6/ARNTL2/ARGMA/PRDM11/TENM2/GATAD2B/METTL4/CCAR2/CREBZF/TRIM27/NPAS3/NOD2/SFRP2/GZF1/SGK1/BMP4/ZNF649/BMPR1B/BRD9/ZSCAN18/SOX9/STAT2/STK3/SUPT6H/TAF4B/TBP/TCEA1/TCEB2/ZEB1/TEAD3/TERF1/TLE3/TNFAIP3/TNFRSF1A/TRA1/TRA5/TWIST1/TNFRSF4/UCP1/VARS/WNT10B/ZNF7/ZNF124/ZNF177/PAX8/FZD5/CARD14/ZNF665/ZNF606/ZC3H12A/CPBE4/ZNF436/CALR/SLIRP/SCRT1/HIST1H3A/SLA2/ZNF397/NROB2/HOPX/KDM2B/LOXL3/CBX2/GAS7/RUNX1/TP63/RUNX3/IRS2/FADD/TNFRSF11A/SPHK1/BUD31/CCNA1/LIMD1/PIAS2/LDB2/CBFA2T2/AURKB/ADIPOQ/H2AFY/MICAL2/VGLL4/ZBTB39/NR1H4 | 222 |
| GO:0035150 | regulation of tube size                                   | 16/901  | 133/17046  | 0.00176 | 0.02638 | 0.02074 | KCNMB2/MRV1/ADM/CP51/ADRB3/ECE1/FGA/FOXC2/GPER1/GUCY1A3/HRH1/KCNJ8/ATP1A2/NPPC/ACTA2/SLC8A1                                                                                                                                                                                                                                                                                                                                                                                                                                                                                                                                                                                                                                                                                                                                                                                                                                                                                                                                                                                                                                                                                                                                                                                                                                                                               | 16  |
| GO:0035051 | cardiocyte differentiation                                | 14/901  | 109/17046  | 0.00179 | 0.0268  | 0.02108 | SPEG/MTOR/TENM4/BMP10/NRG1/ISL1/LMNA/MYL2/PITX2/BMP4/SLC8A1/ACTC1/TWIST1/CALR                                                                                                                                                                                                                                                                                                                                                                                                                                                                                                                                                                                                                                                                                                                                                                                                                                                                                                                                                                                                                                                                                                                                                                                                                                                                                             | 14  |
| GO:0044093 | positive regulation of molecular function                 | 115/901 | 1672/17046 | 0.00181 | 0.02709 | 0.0213  | ABI1/CDH3/FARP1/TRDN/PITRM1/ADCY3/CHI3L1/MAP3K8/CTGF/ADRB3/DRD4/EGFR/EPHA1/ESR1/SPATA13/FGF10/RASA3/TBC1D9B/TBC1D1/PSD3/ARHGFE18/MAPK8IP2/RASGEF1C/ALS2C/RGS22/FGF22/CYTH4/GNAS/GPER1/DOK7/DNAJC15/ANXA2/NRG1/HPCA/AGFG2/HSP90A1/IGF1/IGF2/CYR61/IL1RN/IL6/ISL1/JUP/LCK/ARHGDI1/LGALS9/LHCR/LLGL1/SMAD3/MAP3K1/MFN6/PLEKHG7/NHLH2/NRAS/NTF3/ARHGFE3/PARK2/ANGPT4/PIK3CG/PITX2/PML/PNLIP/RIPK4/TLR9/CYTL1/PON1/RIN2/ARHGFE10L/PRKAR1B/PRKD1/MAPK3/MAP2K2/PSMB4/PAK6/PSMD7/PLEKHG5/PXN/RASGRF2/TRIM27/RGS12/CCL11/CCL17/NOD2/SFRP2/ARHGAP9/SGK1/BMP4/BOK/STK3/STK10/TCEA1/TRA1/TRA5/TRPC6/TWIST1/WNT10B/CXCR4/FZD5/CARD14/SH3BGL3/IRS2/CRADD/FADD/TNFRSF11A/SPHK1/STARD13/MAP3K6/ADIPOQ/ARHGAP29/ARHGFE10/RAPGEF2/USP6N/RABGAP1/IQSEC1/FGF19                                                                                                                                                                                                                                                                                                                                                                                                                                                                                                                                                                                                                                | 115 |
| GO:1903506 | regulation of nucleic acid-templated transcription        | 205/901 | 3227/17046 | 0.00182 | 0.02713 | 0.02134 | ZNF783/CDH13/CDKN1C/C1D/ZBTB18/DMRT2/TBR1/PNRC1/HNRNPUL1/ERLIN2/PSIP1/EGLN2/ZBED9/CIDEA/ZFP42/IL31RA/ZNF358/ZNF738/SMYD1/CYLD/ZNF782/ZNF709/ZNF781/CITED4/RNF168/ZNF366/BHLHA15/DNMT3A/EGFR/EGR3/ELK4/ESR1/SP8/FGF10/FHIT/XRN2/SBNO2/TRAK1/MSRB2/FOXL1/FOXC2/FOXO1/SPG20/NEDD4L/RYPB/VGLL2/MTOR/ZNF549/DNAJC2/DKK3/BMP10/ZNF638/ZNF311/ZNF844/GPER1/ZBTB44/GTF2B/BRF1/SOX8/NRG1/HLX/HMGA1/NR4A1/HOXB3/HOXC4/HOXC5/HOXC6/HOXC7/TFAP2E/ID3/BARHL2/IGF1/IGF2/CYR61/IL6/IL16/FOXK2/INHBA/IRF1/ISL1/JUP/USP50/HILS1/HES5/AFF3/LGALS9/LMNA/LMO2/SMAD3/MEF2D/MEOX1/MEOX2/MITF/LHX8/MOV10/NFATC3/NFYB/NHLH2/NTF3/PARK2/LEF1/SIRT6/PITX2/PKHD1/PLAGL1/PML/RIPPLY3/RIPK4/TLR9/CYTL1/POMC/POU2AF1/BNC2/MED18/BANP/ELP3/PRMT6/DNAJC17/ZNF532/CNOT11/PRKD1/MYNN/PAK6/ARNTL2/ARGMA/PRDM11/TENM2/GATAD2B/CCAR2/CREBZF/TRIM27/NPAS3/NOD2/SFRP2/GZF1/SGK1/BMP4/ZNF649/BMPR1B/BRD9/ZSCAN18/SOX9/STAT2/STK3/SUPT6H/TAF4B/TBP/TCEA1/TCEB2/ZEB1/TEAD3/TLE3/TNFAIP3/TNFRSF1A/TRA1/TRA5/TWIST1/TNFRSF4/UCP1/WNT10B/ZNF7/ZNF124/ZNF177/PAX8/FZD5/CARD14/ZNF665/ZNF606/ZC3H12A/ZNF436/CALR/SLIRP/SCRT1/HIST1H3A/SLA2/ZNF397/NROB2/HOPX/KDM2B/LOXL3/CBX2/GAS7/RUNX1/TP63/RUNX3/ACTN1/FADD/TNFRSF11A/SPHK1/BUD31/CCNA1/LIMD1/PIAS2/LDB2/CBFA2T2/AURKB/ADIPOQ/H2AFY/MICAL2/VGLL4/ZBTB39/NR1H4                                                                                                         | 205 |
| GO:0001656 | metanephros development                                   | 12/901  | 86/17046   | 0.00183 | 0.02719 | 0.02138 | FGF10/FOXC2/SOX8/ID3/FMN1/AQP2/ACAT1/HES5/BMP4/SOX9/PAX8/ADIPOQ                                                                                                                                                                                                                                                                                                                                                                                                                                                                                                                                                                                                                                                                                                                                                                                                                                                                                                                                                                                                                                                                                                                                                                                                                                                                                                           | 12  |
| GO:0006355 | regulation of transcription, DNA-templated                | 204/901 | 3210/17046 | 0.00184 | 0.02725 | 0.02143 | ZNF783/CDH13/CDKN1C/C1D/ZBTB18/DMRT2/TBR1/PNRC1/HNRNPUL1/ERLIN2/PSIP1/EGLN2/ZBED9/CIDEA/ZFP42/IL31RA/ZNF358/ZNF738/SMYD1/CYLD/ZNF782/ZNF709/ZNF781/CITED4/RNF168/ZNF366/BHLHA15/DNMT3A/EGFR/EGR3/ELK4/ESR1/SP8/FGF10/FHIT/XRN2/SBNO2/TRAK1/MSRB2/FOXL1/FOXC2/FOXO1/SPG20/NEDD4L/RYPB/VGLL2/MTOR/ZNF549/DNAJC2/DKK3/BMP10/ZNF638/ZNF311/ZNF844/GPER1/ZBTB44/GTF2B/BRF1/SOX8/NRG1/HLX/HMGA1/NR4A1/HOXB3/HOXC4/HOXC5/HOXC6/HOXC7/TFAP2E/ID3/BARHL2/IGF1/IGF2/CYR61/IL6/IL16/FOXK2/INHBA/IRF1/ISL1/JUP/USP50/HILS1/HES5/AFF3/LGALS9/LMNA/LMO2/SMAD3/MEF2D/MEOX1/MEOX2/MITF/LHX8/MOV10/NFATC3/NFYB/NHLH2/NTF3/PARK2/LEF1/SIRT6/PITX2/PKHD1/PLAGL1/PML/RIPPLY3/RIPK4/TLR9/CYTL1/POMC/POU2AF1/BNC2/MED18/BANP/ELP3/PRMT6/DNAJC17/ZNF532/CNOT11/PRKD1/MYNN/PAK6/ARNTL2/ARGMA/PRDM11/TENM2/GATAD2B/CCAR2/CREBZF/TRIM27/NPAS3/NOD2/SFRP2/GZF1/SGK1/BMP4/ZNF649/BMPR1B/BRD9/ZSCAN18/SOX9/STAT2/STK3/SUPT6H/TAF4B/TBP/TCEA1/TCEB2/ZEB1/TEAD3/TLE3/TNFAIP3/TNFRSF1A/TRA1/TRA5/TWIST1/TNFRSF4/UCP1/WNT10B/ZNF7/ZNF124/ZNF177/PAX8/FZD5/CARD14/ZNF665/ZNF606/ZC3H12A/ZNF436/CALR/SLIRP/SCRT1/HIST1H3A/SLA2/ZNF397/NROB2/HOPX/KDM2B/LOXL3/CBX2/GAS7/RUNX1/TP63/RUNX3/FADD/TNFRSF11A/SPHK1/BUD31/CCNA1/LIMD1/PIAS2/LDB2/CBFA2T2/AURKB/ADIPOQ/H2AFY/MICAL2/VGLL4/ZBTB39/NR1H4                                                                                                               | 204 |

|            |                                                                              |         |            |         |         |         |                                                                                                                                                                                                                                                                                                                                                                                                                                                                                                                                                                                                                                                                                                                                                                                                                                                                                                                                                                                                                                                                |     |
|------------|------------------------------------------------------------------------------|---------|------------|---------|---------|---------|----------------------------------------------------------------------------------------------------------------------------------------------------------------------------------------------------------------------------------------------------------------------------------------------------------------------------------------------------------------------------------------------------------------------------------------------------------------------------------------------------------------------------------------------------------------------------------------------------------------------------------------------------------------------------------------------------------------------------------------------------------------------------------------------------------------------------------------------------------------------------------------------------------------------------------------------------------------------------------------------------------------------------------------------------------------|-----|
| GO:0010604 | positive regulation of macromolecule metabolic process                       | 171/901 | 2632/17046 | 0.00184 | 0.02725 | 0.02143 | ABI1/CDH3/CDH13/CDKN1C/DMRT2/TBR1/ADCY3/CHI3L1/ERLIN2/PSIP1/EGLN2/CCR1/SLC51B/MAP3K8/IL31RA/CTGF/SH3D19/ADRB3/CITED4/RNF168/BHLHA15/DRD4/ECE1/EEF2/EGFR/ESR1/FGA/FGF10/RASA3/SBNO2/FOXC2/FOXO1/GGA3/LARP1/MAPK8IP2/VGLL2/MTOR/RNF144B/PABPC1/DNAJC2/FGF22/NPTN/BMP10/GPER1/DOK7/BRF1/ANXA2/SOX8/NRG1/HMGA1/NR4A1/HOXD3/HSP90AB1/TFAP2E/BARHL2/IGF1/IGF2/CYR61/IL1RN/IL6/FOXK2/INHBA/IRF1/ISL1/JUP/KDR/HES5/LCK/LGALS9/LMNA/LMO2/LTB/SMAD3/MEF2D/MAP3K1/MEOX1/MEOX2/MFI2/MITF/NFATC3/NFYB/NHLH2/NRAS/NTF3/OPRL1/PARK2/LEF1/PRR16/ANGPT4/PIK3CG/PITX2/PLA2G2A/PLAGL1/PML/RIPK4/TLR9/CYTL1/POMC/BANP/PIWIL2/FANCI/PRKAR1B/PRKD1/MAPK3/MAP2K2/PSMB4/PAK6/ARNTL2/RGMA/PSMD7/PTGFR/PXN/ACTA2/RASGRF2/TRIM27/CCL11/CCL17/NPAS3/NOD2/SFRP2/TRA2B/BMP4/ZNF649/BMPR1B/BOK/SOX9/STK3/STK10/SUPT6H/TBP/TCEA1/TCEB2/ZEB1/ACTC1/TEAD3/TNFAIP3/TNFRSF1A/TRA1/TRA5/TWIST1/CCR2/WNT10B/PAX8/CXCR4/FZD5/RAB7A/CARD14/ZC3H12A/CALR/NROB2/CDK10/RUNX1/TP63/RUNX3/IRS2/CRADD/FADD/TNFRSF11A/ALDH1A2/SPHK1/PIAS2/ZFAND2A/MAP3K6/LDB2/CBFA2T2/ADIPOQ/H2AFY/MICAL2/RAPGEF2/FGF19/NR1H4 | 171 |
| GO:0051146 | striated muscle cell differentiation                                         | 24/901  | 238/17046  | 0.00185 | 0.0273  | 0.02147 | SPEG/SMYD1/BHLHA15/MTOR/BMP10/TMOD4/NRG1/IGF1/IGF2/LMNA/MYL2/NFATC3/NOV/LEF1/PITX2/BIN3/BMP4/SLC8A1/ACTC1/WNT10B/CALR/CAST/CASQ1/HOPX                                                                                                                                                                                                                                                                                                                                                                                                                                                                                                                                                                                                                                                                                                                                                                                                                                                                                                                          | 24  |
| GO:0000165 | MAPK cascade                                                                 | 61/901  | 790/17046  | 0.00187 | 0.02754 | 0.02166 | NPFFR2/CHI3L1/CCR1/MAP3K8/IL31RA/CTGF/PPM1L/ADRB3/NLRP6/DRD4/EGFR/FGA/FGF10/RASA3/FOXO1/MAPK8IP2/FGF22/BMP10/GPER1/GSTP1/NRG1/IGF1/IGF2/CYR61/IL1RN/IL6/INHBA/KDR/LGALS9/MAP3K1/NRAS/NTF3/PARK2/PIK3CG/PKHD1/PLA2G2A/TLR9/MAPK3/MAP2K2/PSMB4/PAK6/PSMD7/PXN/RASGRF2/CCL11/CCL17/NOD2/SFRP2/BMP4/SOX9/STK3/TNXB/CXCR4/FZD5/CDK10/IRS2/TNFRSF11A/MAP3K6/ADIPOQ/RAPGEF2/FGF19                                                                                                                                                                                                                                                                                                                                                                                                                                                                                                                                                                                                                                                                                     | 61  |
| GO:1900542 | regulation of purine nucleotide metabolic process                            | 21/901  | 198/17046  | 0.00188 | 0.02759 | 0.02169 | NPFFR2/ADM/ADRB3/DRD4/GABBR1/GAPDH/GNAS/GPER1/DNAJC15/GUCY1A3/HPCA/IGF1/LHCGR/MC2R/NPPC/OPRL1/PALM/SIRT6/MRAP/SCT/CCR2                                                                                                                                                                                                                                                                                                                                                                                                                                                                                                                                                                                                                                                                                                                                                                                                                                                                                                                                         | 21  |
| GO:0061029 | eyelid development in camera-type eye                                        | 4/901   | 11/17046   | 0.0019  | 0.02765 | 0.02175 | INHBA/MAP3K1/STRA6/TWIST1                                                                                                                                                                                                                                                                                                                                                                                                                                                                                                                                                                                                                                                                                                                                                                                                                                                                                                                                                                                                                                      | 4   |
| GO:0080184 | response to phenylpropanoid                                                  | 4/901   | 11/17046   | 0.0019  | 0.02765 | 0.02175 | CIDEA/CYP11A1/FGA/BGLAP                                                                                                                                                                                                                                                                                                                                                                                                                                                                                                                                                                                                                                                                                                                                                                                                                                                                                                                                                                                                                                        | 4   |
| GO:0022414 | reproductive process                                                         | 81/901  | 1111/17046 | 0.0019  | 0.02765 | 0.02175 | CDKN1C/CELF1/ADCY3/ADAM29/COL9A3/ZFP42/ADM/CYP11A1/WBP2NL/DNMT3A/ABAT/DRD4/EGFR/ESR1/FGF10/XRN2/AKR1B1/MAPK8IP2/TSSK2/MTOR/GAPDH/GJB2/GNAS/IZUMO1/HAS1/SOX8/HSD17B2/HSPA1L/HSP90AB1/IGF1/CYR61/IL1R1/IL1RN/INHBA/HILS1/KDR/LGALS9/LHCGR/LMNA/MC2R/LHX8/NPPC/OPRL1/LEF1/PGAM2/PI3/PITX2/SPA17/MOV10L1/PIWIL2/WDR33/HTRA1/PTGFR/TRIM27/RPL29/NPAS3/STRA6/SFRP2/BMP4/SLC8A1/BMPR1B/BOK/SOX9/STK3/TAF4B/TBP/TEAD3/TLR5/PHLDA2/FZD5/CALR/SLIRP/CAST/SPATA16/ANTXR1/KDM2B/CBX2/TP63/CCNA1/ENDOU/MTL5                                                                                                                                                                                                                                                                                                                                                                                                                                                                                                                                                                 | 81  |
| GO:0032651 | regulation of interleukin-1 beta production                                  | 8/901   | 44/17046   | 0.00192 | 0.02778 | 0.02185 | GSTP1/ISL1/LGALS9/SMAD3/PML/NOD2/TNFAIP3/SPHK1                                                                                                                                                                                                                                                                                                                                                                                                                                                                                                                                                                                                                                                                                                                                                                                                                                                                                                                                                                                                                 | 8   |
| GO:0055008 | cardiac muscle tissue morphogenesis                                          | 9/901   | 54/17046   | 0.00193 | 0.02778 | 0.02185 | COL11A1/FOXC2/BMP10/NRG1/ISL1/MYL2/SIRT6/PITX2/ACTC1                                                                                                                                                                                                                                                                                                                                                                                                                                                                                                                                                                                                                                                                                                                                                                                                                                                                                                                                                                                                           | 9   |
| GO:0060350 | endochondral bone morphogenesis                                              | 9/901   | 54/17046   | 0.00193 | 0.02778 | 0.02185 | COMP/GNAS/MEF2D/NPPC/BNC2/CSGALNACT1/BMP4/BMPR1B/SOX9                                                                                                                                                                                                                                                                                                                                                                                                                                                                                                                                                                                                                                                                                                                                                                                                                                                                                                                                                                                                          | 9   |
| GO:1903557 | positive regulation of tumor necrosis factor superfamily cytokine production | 9/901   | 54/17046   | 0.00193 | 0.02778 | 0.02185 | SPON2/HLA-E/ISL1/LGALS9/TLR9/NOD2/TWIST1/CCR2/FADD                                                                                                                                                                                                                                                                                                                                                                                                                                                                                                                                                                                                                                                                                                                                                                                                                                                                                                                                                                                                             | 9   |

|            |                                             |         |            |         |         |         |                                                                                                                                                                                                                                                                                                                                                                                                                                                                                                                                                                                                                                                                                                                                                                                                                                                                                                                                                                                                                                                                                                                                                                                                                                                                                                                                                                                                                                                                                                                                                                                                                                                                                                                                                                                                                                                                                                                           |     |
|------------|---------------------------------------------|---------|------------|---------|---------|---------|---------------------------------------------------------------------------------------------------------------------------------------------------------------------------------------------------------------------------------------------------------------------------------------------------------------------------------------------------------------------------------------------------------------------------------------------------------------------------------------------------------------------------------------------------------------------------------------------------------------------------------------------------------------------------------------------------------------------------------------------------------------------------------------------------------------------------------------------------------------------------------------------------------------------------------------------------------------------------------------------------------------------------------------------------------------------------------------------------------------------------------------------------------------------------------------------------------------------------------------------------------------------------------------------------------------------------------------------------------------------------------------------------------------------------------------------------------------------------------------------------------------------------------------------------------------------------------------------------------------------------------------------------------------------------------------------------------------------------------------------------------------------------------------------------------------------------------------------------------------------------------------------------------------------------|-----|
| GO:0051252 | regulation of RNA metabolic process         | 211/901 | 3337/17046 | 0.00193 | 0.02784 | 0.02189 | ZNF783/CDH13/MBNL2/CDKN1C/C1D/ZBTB18/DMRT2/CELF1/TBR1/PNRC1/HNRPUL1/ERLIN2/PSIP1/EGLN2/ZBED9/CIDEA/ZFP42/IL31RA/ZNF358/ZNF738/SMYD1/CYLD/ZNF782/ZNF709/ZNF781/CITED4/RNF168/ZNF366/BHLHA15/DNMT3A/EGFR/EGR3/ELK4/ESR1/SP8/FGF10/FHIT/XRN2/SBNO2/TRAK1/MSRB2/ACIN1/FOXL1/FOXC2/FOXO1/SPG20/NEDD4L/RYPB/VGLL2/MTOR/ZNF549/PABPC1/DNAJC2/DKK3/BMP10/ZNF638/ZNF311/ZNF844/GPER1/ZBTB44/GTF2B/BRF1/SOX8/NRG1/HLX/HMGA1/NR4A1/HOXB3/HOXC4/HOXC5/HOXC6/HOXD3/TFAP2E/ID3/BARHL2/IGF1/IGF2/CYR61/IL6/IL16/FOXC2/INHBA/IRF1/ISL1/JUP/USP50/HILS1/HES5/AFF3/LGALS9/LMNA/LMO2/SMAD3/MEF2D/MEOX1/MEOX2/MITF/LHX8/MOV10/NFATC3/NFYB/NHLH2/NTF3/PARK2/LEF1/SIRT6/PITX2/PKHD1/PLAGL1/PML/RIPPLY3/RIPK4/TLR9/CYTL1/POMC/POU2AF1/BNC2/MED18/BANP/ELP3/PRMT6/DNAJC17/ZNF532/CNOT11/PRKD1/MYNN/MAPK3/PRMT8/HTRA1/PAK6/ARNTL2/RGMA/PRDM11/TENM2/GATAD2B/CCAR2/CREBZF/TRIM27/NPAS3/NOD2/SFRP2/TRA2B/GZF1/SGK1/BMP4/ZNF649/BMPR1B/BRD9/ZSCAN18/SOX9/STAT2/STK3/SUPT6H/TAFA4B/TBP/TCEA1/TCEB2/ZEB1/TEAD3/TLE3/TNFAIP3/TNFRSF1A/TRAFA1/TRAFA5/TWIST1/TNFRSF4/UCP1/WNT10B/ZNF7/ZNF124/ZNF177/PAX8/FZD5/CARD14/ZNF665/ZC3H14/ZNF606/ZC3H12A/ZNF436/CALR/SLRP/SCRT1/HIST1H3A/SLA2/ZNF397/NROB2/HOPX/KDM2B/LOXL3/CBX2/GAS7/RUNX1/TP63/RUNX3/ACTN1/FADD/TNFRSF11A/SPHK1/BUD31/CCNA1/LIMD1/PIAS2/LDB2/CBFAZT2/AURKB/ADIPOQ/H2AFY/MICAL2/VGLL4/ZBTB39/NR1H4                                                                                                                                                                                                                                                                                                                                                                                                                                                                                                                                                                                               | 211 |
| GO:0030878 | thyroid gland development                   | 5/901   | 18/17046   | 0.00196 | 0.02795 | 0.02198 | FGF10/HOXB3/HOXD3/SMAD3/PAX8                                                                                                                                                                                                                                                                                                                                                                                                                                                                                                                                                                                                                                                                                                                                                                                                                                                                                                                                                                                                                                                                                                                                                                                                                                                                                                                                                                                                                                                                                                                                                                                                                                                                                                                                                                                                                                                                                              | 5   |
| GO:0071371 | cellular response to gonadotropin stimulus  | 5/901   | 18/17046   | 0.00196 | 0.02795 | 0.02198 | CYP11A1/EGR3/INHBA/LHCGR/PAX8                                                                                                                                                                                                                                                                                                                                                                                                                                                                                                                                                                                                                                                                                                                                                                                                                                                                                                                                                                                                                                                                                                                                                                                                                                                                                                                                                                                                                                                                                                                                                                                                                                                                                                                                                                                                                                                                                             | 5   |
| GO:0072077 | renal vesicle morphogenesis                 | 5/901   | 18/17046   | 0.00196 | 0.02795 | 0.02198 | SOX8/FMN1/BMP4/SOX9/PAX8                                                                                                                                                                                                                                                                                                                                                                                                                                                                                                                                                                                                                                                                                                                                                                                                                                                                                                                                                                                                                                                                                                                                                                                                                                                                                                                                                                                                                                                                                                                                                                                                                                                                                                                                                                                                                                                                                                  | 5   |
| GO:0070848 | response to growth factor                   | 65/901  | 855/17046  | 0.00197 | 0.02795 | 0.02198 | CDKN1C/ADCY3/LECT1/CIDEA/CPS1/CTGF/CYP11A1/EGFR/EGR3/FGF10/RASA3/FOXO1/SPG20/NEDD4L/ARHGEF18/MTOR/FGF22/NPTN/BMP10/GRB10/HAS1/NRG1/NR4A1/HTR3A/CYR61/IL1R1/KDR/HES5/LCK/ARHGDI1/LTBP1/SMAD3/MAP3K1/MOV10/NRAS/ARHGEF3/LEF1/PML/PPP1CB/PPP1CC/PRKAR1B/PRKD1/MAPK3/MAP2K2/HTRA1/PSMB4/RGMA/PSMD7/PLEKHG5/PXN/RASGRF2/RIT2/BGLAP/SFRP2/BMP4/BMPR1B/SOX9/ZEB1/TWIST1/TMEM204/RUNX1/RUNX3/IRS2/RAPGEF2/FGF19                                                                                                                                                                                                                                                                                                                                                                                                                                                                                                                                                                                                                                                                                                                                                                                                                                                                                                                                                                                                                                                                                                                                                                                                                                                                                                                                                                                                                                                                                                                   | 65  |
| GO:1903035 | negative regulation of response to wounding | 17/901  | 147/17046  | 0.00197 | 0.02795 | 0.02198 | NLRP6/F11/FGA/GPER1/GSTP1/ANXA2/ISL1/SMAD3/NOV/IL20RB/PROC/PSMB4/NOD2/TNFAIP3/TNFRSF1A/NLRX1/ADIPOQ                                                                                                                                                                                                                                                                                                                                                                                                                                                                                                                                                                                                                                                                                                                                                                                                                                                                                                                                                                                                                                                                                                                                                                                                                                                                                                                                                                                                                                                                                                                                                                                                                                                                                                                                                                                                                       | 17  |
| GO:0036336 | dendritic cell migration                    | 6/901   | 26/17046   | 0.00198 | 0.02795 | 0.02198 | CCR1/LGALS9/PIK3CG/CCR2/CXCR4/CALR                                                                                                                                                                                                                                                                                                                                                                                                                                                                                                                                                                                                                                                                                                                                                                                                                                                                                                                                                                                                                                                                                                                                                                                                                                                                                                                                                                                                                                                                                                                                                                                                                                                                                                                                                                                                                                                                                        | 6   |
| GO:0060561 | apoptotic process involved in morphogenesis | 6/901   | 26/17046   | 0.00198 | 0.02795 | 0.02198 | FOXC2/CYR61/LEF1/PML/PAX8/FZD5                                                                                                                                                                                                                                                                                                                                                                                                                                                                                                                                                                                                                                                                                                                                                                                                                                                                                                                                                                                                                                                                                                                                                                                                                                                                                                                                                                                                                                                                                                                                                                                                                                                                                                                                                                                                                                                                                            | 6   |
| GO:0072207 | metanephric epithelium development          | 6/901   | 26/17046   | 0.00198 | 0.02795 | 0.02198 | SOX8/ACAT1/HES5/SOX9/PAX8/ADIPOQ                                                                                                                                                                                                                                                                                                                                                                                                                                                                                                                                                                                                                                                                                                                                                                                                                                                                                                                                                                                                                                                                                                                                                                                                                                                                                                                                                                                                                                                                                                                                                                                                                                                                                                                                                                                                                                                                                          | 6   |
| GO:2000826 | regulation of heart morphogenesis           | 6/901   | 26/17046   | 0.00198 | 0.02795 | 0.02198 | FOXC2/BMP10/ISL1/BMP4/SOX9/TWIST1                                                                                                                                                                                                                                                                                                                                                                                                                                                                                                                                                                                                                                                                                                                                                                                                                                                                                                                                                                                                                                                                                                                                                                                                                                                                                                                                                                                                                                                                                                                                                                                                                                                                                                                                                                                                                                                                                         | 6   |
| GO:0019538 | protein metabolic process                   | 304/901 | 5009/17046 | 0.00199 | 0.02798 | 0.022   | AKT3/ABI1/GNE/TSPAN5/FARP1/CDKN1C/SPEG/BCKDK/PITRM1/CELF1/HCS1/NPFFR2/ADCY3/TMED10/LECT1/ADAM29/CHI3L1/ERLIN2/EGLN2/B4GALT7/EXOC3/ADPRHL1/CARD16/ALPK2/GALNT15/CLCA1/CLN5/MRPL52/CCR1/SLC51B/NEU4/COL11A1/MAP3K8/IL31RA/EGFLAM/UBLCP1/CPD/CPM/CPS1/TRPM6/MIB2/PARP4/LDLRAD3/B3GLCT/MGAT5B/CS1A/ZNF738/CTGF/SMYD1/PPM1L/SH3D19/CYLD/ADRB3/ESCO2/DBP1/LONRF2/DDOST/RNF168/NLRP6/DLG2/DPH1/DRD4/ECE1/EEF2/EGFR/PATL2/EIF4G1/A2M/ELK4/ADCK5/EPHA1/EPHA3/EPHB4/F11/PRSS54/RNF182/FGA/FGF10/FHIT/RASA3/PPM1E/TRAK1/MSRB2/FOXL1/FOXO1/GGA3/FLOT2/NUP210/NEDD4L/LARP1/PUM2/RYPB/MORC3/MAPK8IP2/TSSK2/MTOR/RNF144B/ST6GALNAC3/GAK/SAMM50/TENM4/LTN1/FBXL21/FBXO2/LCE2B/SACS/GBG1/SLC17A5/RPS6K1/PABPC1/DNAJC2/FGF22/NPTN/VPS4A/BMP10/TMPRSS12/PIGW/GPER1/EOGT/DOK7/MRPS18B/GSTP1/PADI1/GZMA/ANXA2/SERPIND1/NRG1/HSPA1L/HSP90AA1/HSP90AB1/DUPD1/ADAMTSL5/COL28A1/BARHL2/IGF1/IGF2/CYR61/LCE1C/LCE1D/LCE2D/IL1RN/IL6/IL12RB2/PRSS41/INHBA/IRF1/ISL1/ITGB2/ITIH3/ITIH4/IVL/USP50/KCNH2/KDR/HES5/LCK/MUC21/LDLR/LGALS9/LMNA/LOX/LTB/SMAD3/MAP3K1/MF12/MGAT1/MOCS1/NEU1/NRAS/NTF3/OAS2/OPRL1/PARK2/SPOCK3/LEF1/PRR16/CHST15/ANGPT4/PCYOX1/SIRT6/GALNT7/PI3/PIGC/PIK3CG/PKHD1/PLA2G2A/PRKAG3/PML/RIPK4/TLR9/TREM1/CYTL1/POMC/SSH1/BANP/PPP1CB/HERC6/PPP1CC/PIWIL2/ELP3/PRMT6/PPP2R2B/FANCI/CNOT11/PRKAR1B/CSGALNACT1/PRKD1/WBSB2/MAPK3/MAP2K2/PROOC/PRMT8/MASP1/HTRA1/PSMB4/PAK6/PSMD7/TENM2/KLHL8/METT14/MARK4/CCAR2/PTPRE/PXN/RASGRF2/TRIM27/RGR/EXOC4/RPL8/RPL29/CCL11/CCL17/MRPS14/PRSS22/NOD2/SFRP2/SGK1/BMP4/BMPR1B/BOK/SOX9/SRP68/STK3/STK10/SUPT6H/BST2/VAMP2/TCEB2/TERF1/TGM2/TIMP3/TNFAIP3/TNFRSF1A/TNFB/TRAFA5/TWIST1/CCR2/TNFRSF4/VARS/WNT10B/YWHAG/ZAP70/PTP4A1/MOGS/CXCR4/FZD5/RAB7A/CARD14/ERMP1/CPEBA/CALR/CAST/HOPX/TTBK1/SPINK7/TRIM63/KDM2B/CBX2/RAE1/CDK10/TP63/RUNX3/SERPINA6/IRS2/CRADD/FADD/TNFRSF11A/STK19/SPHK1/ENDOU/PIAS2/ZFAND2A/MAP3K6/AURKB/NEURL3/ADIPOQ/RAB3D/H2AFY/PREPL/N4BP1/NUP93/RAPGEF2/ULK2/FGF19 | 304 |

|            |                                                                      |         |            |         |         |         |                                                                                                                                                                                                                                                                                                                                                                                                                                                                                                                                                                                                                                                                                                                                                                                                                                                                                                                                                                                                                                                                                                                                                                                                                                                                                                                                                                                                                                                                                                                                                                                                                                                                                                                                                                                                                                                                                                       |     |
|------------|----------------------------------------------------------------------|---------|------------|---------|---------|---------|-------------------------------------------------------------------------------------------------------------------------------------------------------------------------------------------------------------------------------------------------------------------------------------------------------------------------------------------------------------------------------------------------------------------------------------------------------------------------------------------------------------------------------------------------------------------------------------------------------------------------------------------------------------------------------------------------------------------------------------------------------------------------------------------------------------------------------------------------------------------------------------------------------------------------------------------------------------------------------------------------------------------------------------------------------------------------------------------------------------------------------------------------------------------------------------------------------------------------------------------------------------------------------------------------------------------------------------------------------------------------------------------------------------------------------------------------------------------------------------------------------------------------------------------------------------------------------------------------------------------------------------------------------------------------------------------------------------------------------------------------------------------------------------------------------------------------------------------------------------------------------------------------------|-----|
| GO:0010557 | positive regulation of macromolecule biosynthetic process            | 107/901 | 1544/17046 | 0.00206 | 0.0289  | 0.02273 | CDH13/CDKN1C/DMRT2/TBR1/ERLIN2/PSIP1/SLC51B/IL131RA/CTGF/CITED4/BHLHA15/EEF2/EGFR/ESR1/FGF10/SBNO2/FOXC2/FOXO1/LARP1/VGLL2/MTOR/PABPC1/DNAJC2/BMP10/GPER1/BRF1/SOX8/HMGGA1/NR4A1/TFAP2E/BARHL2/IGF1/IGF2/CYR61/IL6/FOKK2/INHBA/IRF1/ISL1/JUP/KDR/HES5/LGALS9/LMNA/LMO2/LTB/SMAD3/MEF2D/MEOX1/MEOX2/MITF/NFATC3/NFYB/NHLH2/NTF3/PARK2/LEF1/PRR16/PITX2/PLAGL1/RIPKA4/TLR9/CYTL1/POMC/BANP/PIWIL2/PRKD1/MAPK3/ARNTL2/RGMA/TRIM27/NPAS3/NOD2/SFRP2/BMP4/ZNF649/BMPR1B/SOX9/STK3/SUPT6H/TBP/TCEA1/TCEB2/ZEB1/TEAD3/TNFRSF1A/TRAJ1/TRAJ5/TWIST1/CCR2/WNT10B/PAX8/FZD5/CARD14/CALR/RUNX1/TP63/RUNX3/IRS2/FADD/TNFRSF11A/SPHK1/PIAS2/LDB2/CBFA2T2/MICAL2/NR1H4                                                                                                                                                                                                                                                                                                                                                                                                                                                                                                                                                                                                                                                                                                                                                                                                                                                                                                                                                                                                                                                                                                                                                                                                                                               | 107 |
| GO:0050708 | regulation of protein secretion                                      | 33/901  | 367/17046  | 0.00207 | 0.02893 | 0.02275 | CIDEA/ABAT/DRD4/FGA/EXPH5/GNAS/GPER1/FFAR2/HLA-E/IGF1/IL6/ISL1/LGALS9/LLGL1/NOV/PARK2/PDE4C/PML/TLR9/GOLPH3L/SYBU/PRKAR1B/TRIM27/NOD2/VAMP2/TWIST1/TNFRSF4/CACNA1E/RAB11FIP1/NR0B2/IRS2/SYT7/RSAD2                                                                                                                                                                                                                                                                                                                                                                                                                                                                                                                                                                                                                                                                                                                                                                                                                                                                                                                                                                                                                                                                                                                                                                                                                                                                                                                                                                                                                                                                                                                                                                                                                                                                                                    | 33  |
| GO:0044710 | single-organism metabolic process                                    | 303/901 | 4994/17046 | 0.00207 | 0.02893 | 0.02275 | CDH3/GNE/BCKDK/TCIRG1/MTHFS/PDPN/NPFFR2/ADCY3/SLC27A2/HIBADH/CHI3L1/ERLIN2/EGLN2/B4GALT7/ACOT7/CIDEA/GALNT15/CLN5/MRPL52/CCR1/SLC51B/CNP/APOA1B/P/NEU4/COL9A3/COL11A1/GALM/MAP3K8/ADM/IL131RA/EGFLAM/HUS1B/CP51/NDUFAF6/PXNDL/CRABP1/PARP4/B3GLCT/MGAT5B/CTGF/SMYD1/PPM1L/CYB561/MBOAT1/ADRB3/ESCO2/CYP11A1/FITM1/ADAL/DBB1/DDOST/RNF168/NLRP6/DIO3/DLG2/DNMT3A/ABAT/DPH1/DRD4/AGXT/EEF2/EGFR/A2M/ELK4/LIPH/ENO2/ESR1/ALAS1/F11/FAH/FGA/FGF10/FHIT/RASA3/TRAK1/MSRB2/ACIN1/FOXO1/AKR1B1/NUP210/LARP1/RYBP/MAPK8IP2/MTOR/FUCA1/SLC37A4/GABBR1/ST6GALNAC3/PNKD/ACOT11/STEAP2/FBXO2/GATM/GBGT1/GAPDHS/SLC17A5/FGF22/AMPD2/PDE7B/DKK3/SLC2/AMPD3/DHDM/BMP10/GNAS/PIGW/THEM5/GPER1/EOGT/GRB10/MRPS18B/DNAJC15/GSTP1/GUCY1A3/NME7/PAD1I/ANXA2/HAS1/NRG1/HK1/HMGGA1/ACACB/HPCA/HRH1/HSD11B1/HSD17B2/ACADL/HSP90AA1/NME9/IGF1/IGF2/CYR61/IL1RN/IL6/INHBA/INPP5A/ISL1/USP50/KCNH2/KDR/ACAT1/KRT15/MUC21/LDLR/LGALS9/LHCGR/LOX/SMAD3/MC2R/ME1/ME2/MAP3K1/MGAT1/MOC51/NUDT1/MYH4/NUBP1/NDUFB4/NEU1/ATP1A2/NFATC3/NFYB/NPPC/NRAS/NTF3/OAS2/OPRL1/PFAH2/ATP5B/PALM/PARK2/SPOCK3/LEF1/CHST15/PDE4C/PCYOX1/PDE7A/SIRT6/PDE6B/GALNT7/PGAM2/PIGC/PIK3CG/PKHD1/PKM/PLA2G2A/PRKAG3/PML/SLCO1C1/PNLIP/TLR9/TREM1/CYTL1/POMC/PON1/CYP2W1/LPCAT2/PPP1CB/PPP1CC/PIWIL2/ELP3/PRMT6/FANCI/WDR33/SMPD3/VAC14/PRKAR1B/LMBRD1/CSGALNACT1/CISD1/PRKD1/APOBR/MAPK3/MAP2K2/MRAP/PRMT8/MASP1/PSMB4/PAK6/PSMD7/RDH14/PXN/RASGRF2/RFC2/RPA3/SCT/CCL11/CCL17/ABHD4/MRPS14/NOD2/STRA6/SFRP2/MICAL1/CERK/VPS33A/BMP4/SLC4A1/BMPR1B/SOX9/STAT2/STK3/STK10/SUPT6H/VAMP2/TCEA1/TERF1/TNFRSF1A/TNXP/PHLDA2/TWIST1/CCR2/UCP1/UPP1/VARS/WNT10B/CA7/CACNA1E/MOGS/PAX8/CXCR4/FZD5/RAB7A/GDPD3/CERS4/EPHX3/FAAP100/COL18A1/CALR/QTRT1/CAPS/COLQ/SH3BGL3/NR0B2/HOPX/KDM2B/LOXL3/RAE1/CDK10/KMO/SERPINA6/IRS2/TNFRSF11A/ALDH1A2/SYNJ2/SPHK1/STBD1/CH25H/MAP3K6/SLC16A3/AURKB/SDR42E1/ADIPOQ/H2AFY/ENTPD3/MICAL2/NUP93/RAPGEF2/ULK2/LPGAT1/FGF19/NR1H4 | 303 |
| GO:0003012 | muscle system process                                                | 31/901  | 339/17046  | 0.00215 | 0.02996 | 0.02356 | MRV1/TRDN/CHRNA1/CTGF/DTNA/BMP10/GPER1/TMOD4/GUCY1A3/KCNIP2/ANXA6/IGF1/KCNH2/LCK/MYH4/MYL2/ATP1A2/NFATC3/ATP8A2/PGAM2/PIK3CG/PXN/ACTA2/SLC8A1/ACTC1/CALD1/CASQ1/TRIM63/SPHK1/STBD1/RCSDD1                                                                                                                                                                                                                                                                                                                                                                                                                                                                                                                                                                                                                                                                                                                                                                                                                                                                                                                                                                                                                                                                                                                                                                                                                                                                                                                                                                                                                                                                                                                                                                                                                                                                                                             | 31  |
| GO:0044765 | single-organism transport                                            | 226/901 | 3611/17046 | 0.00217 | 0.03011 | 0.02368 | ABI1/CDH3/KCNMB2/TCIRG1/TRDN/ABCA9/SPON2/COG5/ADCY3/TMED10/SLC27A2/RER1/CHGA/CHI3L1/EXOC3/CHRNA1/CHRNA2/CHRNA5/CIDEA/PANX3/AP3S1/CLCA1/CCR1/SLC51B/C15orf27/SLC38A10/CNP/ADM/TRPM6/KLC3/CTGF/ABCC13/SH3D19/CYB561/CYLD/TRPV3/DDOST/BHLHA15/NLRP6/ABAT/DRD4/AGXT/EGFR/A2M/UNC13D/SLC10A4/FCGR2A/FGA/FGF10/RASA3/TRAK1/EXPH5/NFASC/MCL1/NUP210/ATP11A/NEDD4L/MAPK8IP2/MTOR/SLC37A4/SAMM50/STEAP2/SLC17A5/GJA3/GJB2/SLC2/SLC2/VPS4A/GNAS/CRACR2B/GPR26/GPER1/FFAR2/GRB10/FLVCR1/GRIK4/DNAJC15/SCG3/NME7/ANXA2/KCNIP2/NRG1/ANXA6/HK1/ANXA13/HLA-E/ACACB/HPCA/HSPA1L/HSP90AA1/HSP90AB1/HTR3A/IGF1/IGF2/IL1RN/IL6/AQP2/AQP5/INHBA/AQP9/ISL1/JUP/ATP9B/KCNH2/KCNJ8/KCNJ9/KCNMB1/IPO5/TOMM20L/SLC6A17/LCK/LDLR/LGALS9/LLGL1/LMNA/SMAD3/MF12/ATP1A2/NFATC3/NOV/NTF3/OPRL1/SLC22A18/P2RY6/ATP5B/ANO7/PALM/PARK2/PDE4C/PCYOX1/C11orf73/SIRT6/ATP8A2/PIK3CG/PRKAG3/PML/FXYD6/SLCO1C1/PNLIP/TLR9/TREM1/POMC/PON1/ZDHC13/GOLPH3L/SLC47A1/SLC29A3/TRPV6/SMPD3/SLC30A10/CHRNA9/SYBU/PEX26/PRKAR1B/IPT122/LMBRD1/PRKD1/APOBR/MAPK3/MAP2K2/TRPV5/CDC42SE1/TRPC7/RASGRF2/TRIM27/EXOC4/RPL8/RPL29/S100A6/SCT/NOD2/TINAGL1/STRA6/SFRP2/SGK1/VPS33A/BMP4/SLC4A1/SLC6A12/SLC8A1/SLC9A3/SLC20A2/SRP68/SUPT6H/VAMP2/TGM2/TRAPPC10/TRPC4/TRPC6/TRPM2/TWIST1/CCR2/TNFRSF4/UCP1/YWHAG/CA7/CACNA1E/CACNB2/PAX8/FZD5/RAB7A/RAB11FIP1/CALR/SLC25A18/MFSD7/ATP13A4/NR0B2/MON1A/CASQ1/MGARP/RAE1/SLC43A1/SCIN/IRS2/ACTN1/TNFRSF11A/SPHK1/SYT7/SLC16A3/RSAD2/SMDD1/ADIPOQ/RAB3D/NUP93/USP6NL/FGF19/NR1H4                                                                                                                                                                                                                                                                                                                                                                                                                                | 226 |
| GO:0042246 | tissue regeneration                                                  | 9/901   | 55/17046   | 0.0022  | 0.03044 | 0.02394 | FGF10/GATM/IGF1/NOV/PKM/BIN3/TIMP3/WNT10B/HOPX                                                                                                                                                                                                                                                                                                                                                                                                                                                                                                                                                                                                                                                                                                                                                                                                                                                                                                                                                                                                                                                                                                                                                                                                                                                                                                                                                                                                                                                                                                                                                                                                                                                                                                                                                                                                                                                        | 9   |
| GO:0016051 | carbohydrate biosynthetic process                                    | 20/901  | 188/17046  | 0.0023  | 0.03177 | 0.02499 | ENO2/FOXO1/AKR1B1/MTOR/GAPDHS/GPER1/GRB10/HAS1/HRH1/IGF1/IGF2/IL6/LHCGR/CHST15/PGAM2/PRKAG3/PPP1CB/CSGALNACT1/IRS2/ADIPOQ                                                                                                                                                                                                                                                                                                                                                                                                                                                                                                                                                                                                                                                                                                                                                                                                                                                                                                                                                                                                                                                                                                                                                                                                                                                                                                                                                                                                                                                                                                                                                                                                                                                                                                                                                                             | 20  |
| GO:0045944 | positive regulation of transcription from RNA polymerase II promoter | 72/901  | 973/17046  | 0.00231 | 0.03186 | 0.02506 | CDH13/DMRT2/TBR1/ERLIN2/PSIP1/BHLHA15/EGFR/ESR1/FGF10/SBNO2/FOXC2/FOXO1/VGLL2/GPER1/SOX8/HMGGA1/NR4A1/TFAP2E/BARHL2/IGF1/IGF2/CYR61/IL6/FOKK2/INHBA/IRF1/ISL1/HES5/LMNA/LMO2/SMAD3/MEF2D/MEOX1/MEOX2/MITF/NFATC3/NHLH2/NTF3/PARK2/LEF1/PITX2/PLAGL1/TLR9/CYTL1/POMC/PRKD1/MAPK3/ARNTL2/RGMA/NOD2/SFRP2/BMP4/ZNF649/BMPR1B/SOX9/SUPT6H/TCEA1/ZEB1/TEAD3/TNFRSF1A/TWIST1/WNT10B/PAX8/FZD5/RUNX1/TP63/FADD/PIAS2/LDB2/CBFA2T2/MICAL2/NR1H4                                                                                                                                                                                                                                                                                                                                                                                                                                                                                                                                                                                                                                                                                                                                                                                                                                                                                                                                                                                                                                                                                                                                                                                                                                                                                                                                                                                                                                                               | 72  |
| GO:0042476 | odontogenesis                                                        | 14/901  | 112/17046  | 0.00232 | 0.03191 | 0.02509 | ADM/FGF10/ID3/RSP02/AQP5/INHBA/LHX8/LEF1/PITX2/HTRA1/BGLAP/BMP4/TWIST1/TP63                                                                                                                                                                                                                                                                                                                                                                                                                                                                                                                                                                                                                                                                                                                                                                                                                                                                                                                                                                                                                                                                                                                                                                                                                                                                                                                                                                                                                                                                                                                                                                                                                                                                                                                                                                                                                           | 14  |
| GO:0048705 | skeletal system morphogenesis                                        | 22/901  | 215/17046  | 0.00234 | 0.03211 | 0.02525 | COL11A1/COMP/FAM101A/CTGF/FOXC2/GNAS/FLVCR1/HOXB3/HOXD3/FMN1/SMAD3/MEF2D/NPPC/BNC2/CSGALNACT1/SFRP2/BMP4/BMPR1B/SOX9/ZEB1/TWIST1/WNT10B                                                                                                                                                                                                                                                                                                                                                                                                                                                                                                                                                                                                                                                                                                                                                                                                                                                                                                                                                                                                                                                                                                                                                                                                                                                                                                                                                                                                                                                                                                                                                                                                                                                                                                                                                               | 22  |



|            |                                                          |         |            |         |         |         |                                                                                                                                                                                                                                                                                                                                                                                                                                                                                                                                                                                                                                                                                                                                                                                                                                                                                                                                                                                                                                                                                                                                                                                                                                                                                                                                                                                                                                                                                                                                                                                                                                                                                                                                                                                                                                                                                                                                                                                                                                                                               |     |
|------------|----------------------------------------------------------|---------|------------|---------|---------|---------|-------------------------------------------------------------------------------------------------------------------------------------------------------------------------------------------------------------------------------------------------------------------------------------------------------------------------------------------------------------------------------------------------------------------------------------------------------------------------------------------------------------------------------------------------------------------------------------------------------------------------------------------------------------------------------------------------------------------------------------------------------------------------------------------------------------------------------------------------------------------------------------------------------------------------------------------------------------------------------------------------------------------------------------------------------------------------------------------------------------------------------------------------------------------------------------------------------------------------------------------------------------------------------------------------------------------------------------------------------------------------------------------------------------------------------------------------------------------------------------------------------------------------------------------------------------------------------------------------------------------------------------------------------------------------------------------------------------------------------------------------------------------------------------------------------------------------------------------------------------------------------------------------------------------------------------------------------------------------------------------------------------------------------------------------------------------------------|-----|
| GO:2001141 | regulation of RNA biosynthetic process                   | 205/901 | 3244/17046 | 0.00235 | 0.03218 | 0.02531 | ZNF783/CDH13/CDKN1C/C1D/ZBTB18/DMRT2/TBR1/PNRC1/HNRNPUL1/ERLIN2/PSIP1/EGLN2/ZBED9/CIDEA/ZFP42/IL31RA/ZNF358/ZNF738/SMYD1/CYLD/ZNF782/ZNF709/ZNF781/CITED4/RNF168/ZNF366/BHLHA15/DNMT3A/EGFR/EGR3/ELK4/ESR1/SP8/FGF10/FHIT/XRN2/SBNO2/TRAK1/MSRB2/FOXL1/FOXC2/FOXO1/SPG20/NEDD4L/RYPB/VGLL2/MTOR/ZNF549/DNAJC2/DKK3/BMP10/ZNF638/ZNF311/ZNF844/GPER1/ZBTB44/GTF2B/BRF1/SOX8/NRG1/HLX/HMGA1/NR4A1/HOXB3/HOXC4/HOXC5/HOXC6/HOXD3/TFAP2E/ID3/BARHL2/IGF1/IGF2/CYR61/IL6/IL16/FOXK2/INHBA/IRF1/ISL1/JUP/USP50/HLS1/HES5/AFF3/LGALS9/LMNA/LMO2/SMAD3/MEF2D/MEOX1/MEOX2/MITF/LHX8/MOV10/NFATC3/NFYB/NHLH2/NTF3/PARK2/LEF1/SIRT6/PITX2/PKHD1/PLAGL1/PML/RIPPLY3/RIPK4/TLR9/CYTL1/POMC/POU2AF1/BNC2/MED18/BANP/ELP3/PRMT6/DNAJC17/ZNF532/CNOT11/PRKD1/MYNN/PAK3/PRMT8/HTRA1/PAK6/ARNTL2/RGMA/PRDM11/TENM2/GATAD2B/CCAR2/CREBZF/TRIM27/NPAS3/NOD2/SFRP2/GZF1/SGK1/BMP4/ZNF649/BMPR1B/BRD9/ZSCAN18/SOX9/STAT2/STK3/SUPT6H/TAF4B/TBP/TCEA1/TCEB2/ZEB1/TEAD3/TLE3/TNFAP3/TNFRSF1A/TRAFA1/TRAFF5/TWIST1/TNFRSF4/UCP1/WNT10B/ZNF7/ZNF124/ZNF177/PAX8/FZD5/CARD14/ZNF665/ZNF606/ZC3H12A/ZNF436/CALR/SLIRP/SCRT1/HIST1H3A/SLA2/ZNF397/NROB2/HOPX/KDM2B/LOXL3/CBX2/GAS7/RUNX1/TP63/RUNX3/ACTN1/FADD/TNFRSF11A/SPHK1/BUD31/CCNA1/LIMD1/PIAS2/LDB2/CBFA2T2/AURKB/ADIPOQ/H2AFY/MICAL2/VGLL4/ZBTB39/NR1H4                                                                                                                                                                                                                                                                                                                                                                                                                                                                                                                                                                                                                                                                                                                                                                                           | 205 |
| GO:0051246 | regulation of protein metabolic process                  | 156/901 | 2387/17046 | 0.00238 | 0.03251 | 0.02557 | ABI1/FARP1/CDKN1C/CELF1/NPFFR2/ADCY3/TMED10/CHI3L1/EGLN2/CARD16/CCR1/SLC51B/MAP3K8/IL31RA/LDLRAD3/CSTA/CTGF/SH3D19/ADRB3/NLRP6/DLG2/DRD4/ECE1/EEF2/EGFR/PATL2/EIF4G1/A2M/EPHA1/FGA/FGF10/FHIT/RASA3/PPM1E/FOXO1/GGA3/FLOT2/NEDD4L/LARP1/PUM2/MAPK8IP2/MTOR/RNF144B/FBXO2/PABPC1/FGF22/NPTN/BMP10/GPER1/DOK7/GSTP1/ANXA2/SERPIND1/NRG1/HSP90AB1/COL28A1/BARHL2/IGF1/IGF2/CYR61/IL1RN/IL6/INHBA/IRF1/ISL1/ITGB2/ITIH3/ITIH4/USP50/KDR/HES5/LCK/LGALS9/LTB/SMAD3/MAP3K1/MFI2/NRAS/NTF3/OPRL1/PARK2/SPOCK3/LEF1/PRR16/ANGPT4/PI3/PIK3CG/PKHD1/PLA2G2A/PML/TLR9/SSH1/BANP/PIWIL2/ELP3/PPP2R2B/FANCI/CNOT11/PRKAR1B/PRKD1/MAPK3/MAP2K2/MASP1/PSMB4/PAK6/PSMD7/METTL4/CCAR2/PXN/RASGRF2/TRIM27/CCL11/CCL17/NOD2/SFRP2/BMP4/BOK/SOX9/STK3/STK10/SUPT6H/BST2/TERF1/TIMP3/TNFAP3/TNFRSF1A/TNXB/TWIST1/CCR2/TNFRSF4/VARS/WNT10B/YWHAG/CXCR4/FZD5/RAB7A/CARD14/CPEB4/CALR/CAST/SPINK7/CDK10/TP63/SERPINA6/IRS2/CRADD/FADD/TNFRSF11A/SPHK1/ZFAND2A/MAP3K6/ADIPOQ/H2AFY/N4BP1/RAPGEF2/FGF19                                                                                                                                                                                                                                                                                                                                                                                                                                                                                                                                                                                                                                                                                                                                                                                                                                                                                                                                                                                                                                                                                                 | 156 |
| GO:0021700 | developmental maturation                                 | 23/901  | 229/17046  | 0.0024  | 0.03269 | 0.02571 | CDH3/CDKN1C/CLN5/SEZ6/SCLT1/FAM101A/BHLHA15/NFASC/FLVCR1/SOX8/KCNIP2/IGF1/KDR/HES5/NPPC/PALM/CEND1/WNT10B/FZD5/BFSP2/RUNX1/RUNX3/ALDH1A2                                                                                                                                                                                                                                                                                                                                                                                                                                                                                                                                                                                                                                                                                                                                                                                                                                                                                                                                                                                                                                                                                                                                                                                                                                                                                                                                                                                                                                                                                                                                                                                                                                                                                                                                                                                                                                                                                                                                      | 23  |
| GO:0048871 | multicellular organismal homeostasis                     | 29/901  | 313/17046  | 0.00243 | 0.03302 | 0.02597 | CDH3/ADCY3/CIDEA/ZG16B/CTGF/ADRB3/ABAT/FOXO1/AKR1B1/DFNB31/AMPD2/AMPD3/GNAS/ACADL/IL1RN/AQP2/KDR/IL20RB/TLR9/CYTL1/PRKAR1B/BGLAP/NOD2/SOX9/TNFAIP3/RAB7A/TP63/TNFRSF11A/LDB2                                                                                                                                                                                                                                                                                                                                                                                                                                                                                                                                                                                                                                                                                                                                                                                                                                                                                                                                                                                                                                                                                                                                                                                                                                                                                                                                                                                                                                                                                                                                                                                                                                                                                                                                                                                                                                                                                                  | 29  |
| GO:0001659 | temperature homeostasis                                  | 7/901   | 36/17046   | 0.00245 | 0.03319 | 0.0261  | CIDEA/ADRB3/ABAT/FOXO1/ACADL/IL1RN/TNFRSF11A                                                                                                                                                                                                                                                                                                                                                                                                                                                                                                                                                                                                                                                                                                                                                                                                                                                                                                                                                                                                                                                                                                                                                                                                                                                                                                                                                                                                                                                                                                                                                                                                                                                                                                                                                                                                                                                                                                                                                                                                                                  | 7   |
| GO:0050731 | positive regulation of peptidyl-tyrosine phosphorylation | 17/901  | 150/17046  | 0.00245 | 0.03319 | 0.0261  | ABI1/IL31RA/FGF10/MTOR/DOK7/NRG1/IGF1/IGF2/IL6/ISL1/HES5/LCK/NTF3/ANGPT4/NOD2/TNFRSF1A/ADIPOQ                                                                                                                                                                                                                                                                                                                                                                                                                                                                                                                                                                                                                                                                                                                                                                                                                                                                                                                                                                                                                                                                                                                                                                                                                                                                                                                                                                                                                                                                                                                                                                                                                                                                                                                                                                                                                                                                                                                                                                                 | 17  |
| GO:1901576 | organic substance biosynthetic process                   | 331/901 | 5519/17046 | 0.00246 | 0.0332  | 0.02611 | CDH3/GNE/ZNF783/CDH13/CDKN1C/TCIRG1/C1D/ZBTB18/MTHFS/DMRT2/CELF1/TBR1/NPFFR2/ADCY3/PNRC1/SLC27A2/HNRNPUL1/ERLIN2/PSIP1/EGLN2/B4GALT7/ACOT7/ZBED9/CIDEA/GALNT15/MRPL52/SLC51B/NEU4/ZFP42/ADM/IL31RA/CP51/ZNF358/PARP4/B3GLCT/MGAT5B/ZNF738/CTGF/SMYD1/PPM1L/CYLD/MBOAT1/ADRB3/ESCO2/CYP11A1/ZNF782/FITM1/ADAL/ZNF709/ZNF781/CITED4/DBD1/DDOST/RNF168/ZNF366/BHLHA15/DNMT3A/ABAT/DRD4/AGXT/EEF2/EGFR/EGR3/PATL2/EIF4G1/ELK4/ENO2/ESR1/ALAS1/S/P8/FGF10/FHIT/XRN2/SBNO2/TRAK1/MSRB2/FOXL1/FOXC2/FOXO1/AKR1B1/NUP210/NEDD4L/LARP1/PUM2/RYPB/VGLL2/MTOR/GABBR1/ZNF549/ST6GALNAC3/GATM/GBGT1/GAPDH5/SLC17A5/PABPC1/DNAJC2/AMPD2/DKK3/GLS2/AMPD3/BMP10/ZNF638/GNAS/ZNF311/PIGW/ZNF844/GPER1/EOGT/GRB10/MRPS18B/ZBTB44/GSTP1/GTF2B/BRF1/GUCY1A3/NME7/PAD1/HAS1/SOX8/NRG1/HLX/HMGA1/NR4A1/ACACB/HPCA/HOXB3/HOXC4/HOXC5/HOXC6/HOXD3/HRH1/HSD11B1/HSD17B2/ACADL/TFAP2E/ID3/BARHL2/NME9/IGF1/IGF2/CYR61/IL6/IL16/FOXK2/INHBA/IRF1/ISL1/JUP/USP50/HLS1/KDR/ACAT1/HES5/AFF3/MUC21/LDLR/LGALS9/LHCGR/LMO2/LTB/SMAD3/MC2R/ME1/MEF2D/MEOX1/MEOX2/MGAT1/MITF/LHX8/MOCS1/MOV10/DRG1/NEU1/NFATC3/NFYB/NHLH2/NPPC/NTF3/OAS2/OPRL1/ATP5B/PALM/PARK2/LEF1/PRR16/CHST15/SIRT6/GALNT7/PGAM2/PIGC/PIK3CG/PITX2/PKHD1/PKM/PLA2G2A/PLAGL1/PRKAG3/PML/RIPPLY3/RIPK4/TLR9/CYTL1/POMC/POU2AF1/BNC2/MED18/LPCAT2/BANP/PPP1CB/PIWIL2/ELP3/PRMT6/DNAJC17/ZNF532/CNOT11/VAC14/CSGALNACT1/PRKD1/MYNN/PAK3/MRAP/PRMT8/PAK6/ARNTL2/RGMA/PRDM11/TENM2/GATAD2B/METTL4/CCAR2/CREBZF/RFC2/TRIM27/RGS12/RP A3/RPL8/RPL29/SCT/MRPS14/NPAS3/NOD2/SFRP2/GZF1/SGK1/BMP4/ZNF649/BMPR1B/BRD9/ZSCAN18/SOX9/SRP68/STAT2/STK3/SUPT6H/TAF4B/TBP/TCEA1/TCEB2/ZEB1/TEAD3/TERF1/TLE3/TNFAP3/TNFRSF1A/TRAFA1/TRAFF5/TWIST1/CCR2/TNFRSF4/UCP1/UPP1/VARS/WNT10B/YWHAG/ZNF7/ZNF124/ZNF177/MOGS/PAX8/FZD5/CARD14/CERS4/ZNF665/ZNF606/ZC3H12A/CPEB4/ZNF436/CALR/QTRT1/SLIRP/SCRT1/HIST1H3A/SLA2/ZNF397/NROB2/HOPX/KDM2B/LOXL3/CBX2/RAE1/GAS7/KMO/RUNX1/TP63/RUNX3/IRS2/ACTN1/FADD/TNFRSF11A/ALDH1A2/SYNJ2/SPHK1/BUD31/CCNA1/LIMD1/CH25H/PIAS2/LDB2/CBFA2T2/AURKB/SDR42E1/ADIPOQ/H2AFY/MICAL2/VGLL4/NUP93/RAPGEF2/ZBTB39/LPGA T1/FGF19/NR1H4 | 331 |
| GO:1903530 | regulation of secretion by cell                          | 47/901  | 581/17046  | 0.00247 | 0.03332 | 0.0262  | CHGA/CIDEA/ABAT/DRD4/UNC13D/FGA/EXPH5/VPS4A/GNAS/GPER1/FFAR2/HLA-E/IGF1/IL1RN/IL6/INHBA/ISL1/LGALS9/LLGL1/NOV/PARK2/PDE4C/PML/TLR9/POMC/GOLPH3L/TRPV6/SMPD3/SYBU/PRKAR1B/TRIM27/SCT/NOD2/VAMP2/TWIST1/CCR2/TNFRSF4/CACNA1E/PAX8/RAB7A/RAB11FIP1/NROB2/IRS2/SYT7/RSAD2/ADIPOQ/RAB3D                                                                                                                                                                                                                                                                                                                                                                                                                                                                                                                                                                                                                                                                                                                                                                                                                                                                                                                                                                                                                                                                                                                                                                                                                                                                                                                                                                                                                                                                                                                                                                                                                                                                                                                                                                                            | 47  |
| GO:0060538 | skeletal muscle organ development                        | 18/901  | 163/17046  | 0.00248 | 0.03332 | 0.0262  | ZBTB18/CHRNA1/SMYD1/FLNB/VGLL2/SOX8/HLX/MEF2D/MEOX2/NFATC3/NRAS/PITX2/PLAGL1/BIN3/STRA6/TWIST1/WNT10B/CASQ1                                                                                                                                                                                                                                                                                                                                                                                                                                                                                                                                                                                                                                                                                                                                                                                                                                                                                                                                                                                                                                                                                                                                                                                                                                                                                                                                                                                                                                                                                                                                                                                                                                                                                                                                                                                                                                                                                                                                                                   | 18  |
| GO:0055006 | cardiac cell development                                 | 9/901   | 56/17046   | 0.0025  | 0.03351 | 0.02635 | SPEG/MTOR/BMP10/LMNA/MYL2/PITX2/BMP4/SLC8A1/ACTC1                                                                                                                                                                                                                                                                                                                                                                                                                                                                                                                                                                                                                                                                                                                                                                                                                                                                                                                                                                                                                                                                                                                                                                                                                                                                                                                                                                                                                                                                                                                                                                                                                                                                                                                                                                                                                                                                                                                                                                                                                             | 9   |

|            |                                                                         |         |            |         |         |         |                                                                                                                                                                                                                                                                                                                                                                                                                                                                                                                                                                                                                                                                                                                                                                          |     |
|------------|-------------------------------------------------------------------------|---------|------------|---------|---------|---------|--------------------------------------------------------------------------------------------------------------------------------------------------------------------------------------------------------------------------------------------------------------------------------------------------------------------------------------------------------------------------------------------------------------------------------------------------------------------------------------------------------------------------------------------------------------------------------------------------------------------------------------------------------------------------------------------------------------------------------------------------------------------------|-----|
| GO:0045935 | positive regulation of nucleobase-containing compound metabolic process | 110/901 | 1604/17046 | 0.00251 | 0.03362 | 0.02644 | CDH13/CDKN1C/DMRT2/TBR1/ERLIN2/PSIP1/ADM/IL31RA/ADR83/CITED4/RNF168/BHLHA15/EGFR/ESR1/FGF10/SBNO2/FOXC2/FOXO1/VGLL2/MTOR/GAPDH/PABPC1/DNAJC2/BMP10/GNAS/GPER1/BRF1/GUCY1A3/SOX8/HMGA1/NR4A1/HPCA/TFAP2E/BARHL2/IGF1/IGF2/CYR61/IL6/FOXK2/INHBA/IRF1/ISL1/JUP/HES5/LGALS9/LHCGR/LMNA/LMO2/SMA D3/MC2R/MEF2D/MEOX1/MEOX2/MITF/NFATC3/NFYB/NHLH2/NPPC/NTF3/PARK2/LEF1/PITX2/PLAGL1/RIPK4/TLR9/CYTL1/POMC/BANP/PRKD1/MAPK3/MRAP/ARNTL2/RGMA/T RIM27/SCT/NPAS3/NOD2/SFRP2/TRA2B/BMP4/ZNF649/BMPR1B/SOX9/STK3/SUPT6H/TBP/TCEA1/TCEB2/ZEB1/TEAD3/TNFRSF1A/TRAF1/TRAF5/TWIST1/WNT10B/PAX8/FZD5/CA RD14/CALR/RUNX1/TP63/RUNX3/FADD/TNFRSF11A/SPHK1/PIAS2/LDB2/CBFA2T2/MICAL2/NR1H4                                                                                                | 110 |
| GO:0042303 | molting cycle                                                           | 13/901  | 101/17046  | 0.00252 | 0.03362 | 0.02644 | CDH3/APCDD1/TRPV3/EGFR/FGF10/GNAS/INHBA/SOX9/WNT10B/RUNX1/TP63/RUNX3/LDB2                                                                                                                                                                                                                                                                                                                                                                                                                                                                                                                                                                                                                                                                                                | 13  |
| GO:0042633 | hair cycle                                                              | 13/901  | 101/17046  | 0.00252 | 0.03362 | 0.02644 | CDH3/APCDD1/TRPV3/EGFR/FGF10/GNAS/INHBA/SOX9/WNT10B/RUNX1/TP63/RUNX3/LDB2                                                                                                                                                                                                                                                                                                                                                                                                                                                                                                                                                                                                                                                                                                | 13  |
| GO:1901342 | regulation of vasculature development                                   | 21/901  | 203/17046  | 0.00255 | 0.03362 | 0.02644 | LECT1/CHI3L1/ADM/EPHA1/VASH1/FOXC2/IL6/ISL1/KDR/ANGPT4/PML/PRKD1/CCL11/SFRP2/BMP4/TNFAIP3/TWIST1/CCR2/RUNX1/SPHK1/RAPGEF2                                                                                                                                                                                                                                                                                                                                                                                                                                                                                                                                                                                                                                                | 21  |
| GO:0072087 | renal vesicle development                                               | 5/901   | 19/17046   | 0.00255 | 0.03362 | 0.02644 | SOX8/FMN1/BMP4/SOX9/PAX8                                                                                                                                                                                                                                                                                                                                                                                                                                                                                                                                                                                                                                                                                                                                                 | 5   |
| GO:0006366 | transcription from RNA polymerase II promoter                           | 124/901 | 1842/17046 | 0.00257 | 0.03362 | 0.02644 | ZNF783/CDH13/CDKN1C/ZBTB18/DMRT2/TBR1/ERLIN2/PSIP1/EGLN2/CTGF/RNF168/ZNF366/BHLHA15/DNMT3A/EGFR/ELK4/ESR1/FGF10/SBNO2/TRAK1/FOXO1/FOXO2/FOXO3/N EDD4L/RYPB/VGLL2/MTOR/GLS2/BMP10/GPER1/GTF2B/SOX8/HMGA1/NR4A1/HOXB3/HOXC5/HOXC6/TFAP2E/ID3/BARHL2/IGF1/IGF2/CYR61/IL6/FOXK2/INHBA/IRF1/ISL1/HES5/ LMO2/SMAD3/MEF2D/MEOX1/MEOX2/MITF/NFATC3/NHLH2/NTF3/PARK2/LEF1/PITX2/PLAGL1/PRKAG3/RIPPLY3/TLR9/CYTL1/POMC/POU2AF1/MED18/ELP3/PRMT6/DNAJC17/ PRKD1/MAPK3/ARNTL2/RGMA/TENM2/GATAD2B/TRIM27/NPAS3/NOD2/SFRP2/GZF1/BMP4/ZNF649/BMPR1B/ZSCAN18/SOX9/STAT2/SUPT6H/TAFA4/TBP/TCEA1/TCEB2/ZEB1/T EAD3/TNFRSF1A/TWIST1/UCP1/WNT10B/YWHAG/ZNF177/PAX8/FZD5/CALR/SCRT1/SLA2/NROB2/HOPX/KDM2B/CBX2/RUNX1/TP63/RUNX3/FADD/BUD31/CCNA1/PIAS2/LDB2/C BFA2T2/AURKB/H2AFY/MICAL2/NR1H4 | 124 |
| GO:0072507 | divalent inorganic cation homeostasis                                   | 33/901  | 372/17046  | 0.00257 | 0.03362 | 0.02644 | TRDN/CCR1/ADM/DRD4/ESR1/NPTN/GPER1/ANXA6/KDR/LCK/ATP1A2/OPRL1/PARK2/PDE6B/PIK3CG/PKHD1/PML/SLC30A10/CHRNA9/PRKD1/TRPC7/CCL11/BMP4/SLC8A1/TGM 2/TRPC4/TRPC6/CCR2/CXCR4/CALR/ATP13A4/CASQ1/SMDT1                                                                                                                                                                                                                                                                                                                                                                                                                                                                                                                                                                           | 33  |
| GO:0050848 | regulation of calcium-mediated signaling                                | 8/901   | 46/17046   | 0.00257 | 0.03362 | 0.02644 | CDH13/RCAN2/DRD4/NRG1/IGF1/ZAP70/SLA2/CD8A                                                                                                                                                                                                                                                                                                                                                                                                                                                                                                                                                                                                                                                                                                                               | 8   |
| GO:0048699 | generation of neurons                                                   | 102/901 | 1471/17046 | 0.00257 | 0.03362 | 0.02644 | FARP1/CDKN1C/SPON2/ZBTB18/TBR1/GPRIN1/CLNS/SEZ6/CNP/COL9A3/SCLT1/ADM/DNMT3A/EFNA2/EGFR/EIF4G1/EML1/EPHA1/EPHA3/EPHB4/FGF10/RASA3/BTBD3/SPG20/N FASC/EPB41L3/NEDD4L/PSD3/MAPK8IP2/DFNB31/TENM4/FGF22/NPTN/GPER1/SOX8/KCNIP2/NRG1/HOXB3/HOXD3/HSP90AA1/HSP90AB1/ID3/RSPO2/FMN1/BARHL2/IL6/INHBA /ISL1/HES5/STMN1/ARHGDI1/LLGL1/LHX8/NEU1/NRAS/NTF3/PALM/PARK2/LEF1/CEND1/ATP8A2/PITX2/SSH1/PPP1CC/ELP3/PRKD1/MAPK3/MAP2K2/PSMB4/RGMA/TRPC7/PSM D7/TENM2/RASGRF2/S100A6/SGK1/BMP4/BMPR1B/SLIT1/SOX9/ZEB1/TRPC4/TRPC6/TWIST1/WNT10B/YWHAG/CACNB2/CXCR4/FZD5/LST1/CALR/SCRT1/PARD6B/GAS7/RUNX1/ RUNX3/IRS2/ALDH1A2/CBFA2T2/RAPGEF2/ULK2/FGF19                                                                                                                                 | 102 |
| GO:0071363 | cellular response to growth factor stimulus                             | 63/901  | 833/17046  | 0.00259 | 0.03362 | 0.02644 | CDKN1C/ADCY3/LECT1/CIDEA/CPS1/CTGF/CYP11A1/EGFR/EGR3/FGF10/RASA3/FOXO1/SPG20/NEDD4L/ARHGEF18/MTOR/FGF22/NPTN/BMP10/GRB10/HAS1/NRG1/NR4A1/HTR3 A/CYR61/KDR/HES5/LCK/ARHGDI1/LTBP1/SMAD3/MAP3K1/MOV10/NRAS/ARHGEF3/LEF1/PML/PPP1CB/PPP1CC/PRKAR1B/PRKD1/MAPK3/MAP2K2/HTRA1/PSMB4/RGMA/PSMD 7/PLEKHG5/PXN/RASGRF2/RIT2/BGLAP/SFRP2/BMP4/BMPR1B/SOX9/ZEB1/TWIST1/TMEM204/RUNX1/IRS2/RAPGEF2/FGF19                                                                                                                                                                                                                                                                                                                                                                            | 63  |
| GO:0000738 | DNA catabolic process, exonucleolytic                                   | 3/901   | 6/17046    | 0.00261 | 0.03362 | 0.02644 | XRN2/ERI3/ERI1                                                                                                                                                                                                                                                                                                                                                                                                                                                                                                                                                                                                                                                                                                                                                           | 3   |
| GO:0009838 | abscission                                                              | 3/901   | 6/17046    | 0.00261 | 0.03362 | 0.02644 | SPG20/VPS4A/AURKB                                                                                                                                                                                                                                                                                                                                                                                                                                                                                                                                                                                                                                                                                                                                                        | 3   |
| GO:0032960 | regulation of inositol trisphosphate biosynthetic process               | 3/901   | 6/17046    | 0.00261 | 0.03362 | 0.02644 | GPER1/HRH1/LHCGR                                                                                                                                                                                                                                                                                                                                                                                                                                                                                                                                                                                                                                                                                                                                                         | 3   |
| GO:0043031 | negative regulation of macrophage activation                            | 3/901   | 6/17046    | 0.00261 | 0.03362 | 0.02644 | IL31RA/BPI/ZC3H12A                                                                                                                                                                                                                                                                                                                                                                                                                                                                                                                                                                                                                                                                                                                                                       | 3   |
| GO:0060019 | radial glial cell differentiation                                       | 3/901   | 6/17046    | 0.00261 | 0.03362 | 0.02644 | FGF10/HES5/LEF1                                                                                                                                                                                                                                                                                                                                                                                                                                                                                                                                                                                                                                                                                                                                                          | 3   |

|            |                                          |         |            |         |         |         |                                                                                                                                                                                                                                                                                                                                                                                                                                                                                                                                                                                                                                                                                                                                                                                                                                                                                                                                       |     |
|------------|------------------------------------------|---------|------------|---------|---------|---------|---------------------------------------------------------------------------------------------------------------------------------------------------------------------------------------------------------------------------------------------------------------------------------------------------------------------------------------------------------------------------------------------------------------------------------------------------------------------------------------------------------------------------------------------------------------------------------------------------------------------------------------------------------------------------------------------------------------------------------------------------------------------------------------------------------------------------------------------------------------------------------------------------------------------------------------|-----|
| GO:0072049 | comma-shaped body morphogenesis          | 3/901   | 6/17046    | 0.00261 | 0.03362 | 0.02644 | HES5/BMP4/PAX8                                                                                                                                                                                                                                                                                                                                                                                                                                                                                                                                                                                                                                                                                                                                                                                                                                                                                                                        | 3   |
| GO:0072174 | metanephric tubule formation             | 3/901   | 6/17046    | 0.00261 | 0.03362 | 0.02644 | SOX8/SOX9/PAX8                                                                                                                                                                                                                                                                                                                                                                                                                                                                                                                                                                                                                                                                                                                                                                                                                                                                                                                        | 3   |
| GO:1902031 | regulation of NADP metabolic process     | 3/901   | 6/17046    | 0.00261 | 0.03362 | 0.02644 | ME1/ME2/PGAM2                                                                                                                                                                                                                                                                                                                                                                                                                                                                                                                                                                                                                                                                                                                                                                                                                                                                                                                         | 3   |
| GO:0045087 | innate immune response                   | 73/901  | 994/17046  | 0.00262 | 0.03362 | 0.02644 | ABI1/TANK/KLRG1/SPON2/ADCY3/CHGA/MAP3K8/CYLD/DDOST/COCH/DMBT1/EGFR/A2M/UNC13D/FCGR2A/FGA/FGF10/RASA3/FOXO1/MTOR/FGF22/GPER1/FFAR2/NRG1/HLA-B/HLA-DPA1/HLA-E/HLA-F/NR4A1/HSP90AA1/HSP90AB1/CD300E/IRF1/ITGB2/LCK/LGALS9/MAP3K1/MOV10/NFATC3/NRAS/OAS2/PIK3CG/PML/TLR9/TREM1/PRKAR1B/PRKD1/MAPK3/MAP2K2/MASP1/PSMB4/PSMD7/RASGRF2/TRIM27/DEFB134/CCL11/CCL17/NOD2/STAT2/BST2/TLR5/TNFAIP3/CCR2/ZAP70/NLRX1/UNC93B1/IFITM1/IRS2/FADD/RSAD2/LY86/RAPGEF2/FGF19                                                                                                                                                                                                                                                                                                                                                                                                                                                                            | 73  |
| GO:0050790 | regulation of catalytic activity         | 142/901 | 2151/17046 | 0.00262 | 0.03362 | 0.02644 | ABI1/CDH3/FARP1/RCAN2/CDKN1C/PITRM1/NPFFR2/ADCY3/CHI3L1/CARD16/MAP3K8/CSTA/CTGF/ADRB3/DLG2/DRD4/EGFR/A2M/EPHA1/EPHA3/ESR1/SPATA13/PHACTR1/FGF10/RASA3/PPM1E/TBC1D9B/TBC1D1/PSD3/ARHGFE18/MAPK8IP2/MTOR/GABBR1/RASGEF1C/ALS2CL/RGS22/FGF22/CYTH4/GNAS/GPER1/DOK7/DNAJC15/GSTP1/GZMA/ANXA2/SERPIND1/NRG1/HPCA/AGFG2/HSP90AA1/HSP90AB1/COL28A1/IGF2/CYR61/IL1RN/IL6/ITIH3/ITIH4/IPOS/LCK/ARHGDI1/LGALS9/LHCGR/LLGL1/SMAD3/MAP3K1/PLEKHG7/NRAS/NTF3/PALM/ARHGFE3/PARK2/SPOCK3/LEF1/ANGPT4/PI3/PIK3CG/PML/PNLIP/TLR9/RIN2/ELP3/ARHGFE10L/PPP2R2B/VAC14/PRKAR1B/PRKD1/MAPK3/MAP2K2/SLAMF8/CDC42S E1/PSMB4/PAK6/PSMD7/PLEKHG5/CCAR2/PXN/RASGRF2/TRIM27/RGS12/CCL11/CCL17/NOD2/SFRP2/ARHGAP9/SGK1/BMP4/BOK/STK3/STK10/BST2/TCEA1/TERF1/TIMP3/TNFAIP3/TNXB/CCR2/TNFRSF4/YWHAG/CXCR4/FZD5/CARD14/CAST/SH3BGL3/SPINK7/TP63/SERPINA6/IRS2/CRADD/FADD/TNFRSF11A/STARD13/MAP3K6/ADIPOQ/ARHGAP29/H2AFY/ARHGFE10/RAPGEF2/USP6NL/RABGAP1L/IQSEC1/FGF19 | 142 |
| GO:0050866 | negative regulation of cell activation   | 17/901  | 151/17046  | 0.00263 | 0.03362 | 0.02644 | IL31RA/CYLD/GPER1/HLX/ZC3H12D/INHBA/IRF1/LGALS9/IL20RB/PAG1/BMP4/BPI/TNFAIP3/CCR2/LST1/ZC3H12A/SLA2                                                                                                                                                                                                                                                                                                                                                                                                                                                                                                                                                                                                                                                                                                                                                                                                                                   | 17  |
| GO:0055123 | digestive system development             | 17/901  | 151/17046  | 0.00263 | 0.03362 | 0.02644 | CDKN1C/CPS1/EGFR/FGF10/FOXL1/HLX/IGF1/IGF2/SMAD3/PITX2/SCT/STRA6/SFRP2/BMP4/PPDPF/TP63/ALDH1A2                                                                                                                                                                                                                                                                                                                                                                                                                                                                                                                                                                                                                                                                                                                                                                                                                                        | 17  |
| GO:0032675 | regulation of interleukin-6 production   | 12/901  | 90/17046   | 0.0027  | 0.0345  | 0.02713 | SPON2/HLA-B/IL6/ISL1/LGALS9/TLR9/NOD2/BPI/TNFAIP3/TWIST1/NLRX1/ZC3H12A                                                                                                                                                                                                                                                                                                                                                                                                                                                                                                                                                                                                                                                                                                                                                                                                                                                                | 12  |
| GO:0046689 | response to mercury ion                  | 4/901   | 12/17046   | 0.00273 | 0.03465 | 0.02725 | GATM/AQP2/AQP9/PGAM2                                                                                                                                                                                                                                                                                                                                                                                                                                                                                                                                                                                                                                                                                                                                                                                                                                                                                                                  | 4   |
| GO:0060439 | trachea morphogenesis                    | 4/901   | 12/17046   | 0.00273 | 0.03465 | 0.02725 | RSPO2/MAPK3/MAP2K2/BMP4                                                                                                                                                                                                                                                                                                                                                                                                                                                                                                                                                                                                                                                                                                                                                                                                                                                                                                               | 4   |
| GO:0051051 | negative regulation of transport         | 36/901  | 418/17046  | 0.00277 | 0.03518 | 0.02766 | TRDN/CHGA/CIDEA/CYLD/DRD4/NEDD4L/MTOR/GRB10/ANXA2/NRG1/ANXA13/IL1RN/IL6/INHBA/KCNH2/LGALS9/ATP1A2/NOV/OPRL1/PARK2/PDE4C/SIRT6/PML/TLR9/LMBRD1/PRKD1/TRIM27/SCT/BST2/TWIST1/CCR2/TNFRSF4/RAB11FIP1/IRS2/RSAD2/ADIPOQ                                                                                                                                                                                                                                                                                                                                                                                                                                                                                                                                                                                                                                                                                                                   | 36  |
| GO:1901653 | cellular response to peptide             | 40/901  | 478/17046  | 0.0028  | 0.03536 | 0.02781 | TCIRG1/ADCY3/AP3S1/CPS1/CYP11A1/EGFR/EIF4G1/FGF10/RASA3/FOXC2/FOXO1/AKR1B1/MTOR/FGF22/GNAS/GPER1/GRB10/NRG1/NR4A1/IGF2/LCK/NRAS/PRKAG3/TLR9/PRKAR1B/LMBRD1/MAPK3/MAP2K2/PSMB4/PSMD7/PTPRE/PXN/RASGRF2/NOD2/VAMP2/MGARP/IRS2/ADIPOQ/RAPGEF2/FGF19                                                                                                                                                                                                                                                                                                                                                                                                                                                                                                                                                                                                                                                                                      | 40  |
| GO:0051048 | negative regulation of secretion         | 19/901  | 178/17046  | 0.00281 | 0.03536 | 0.02781 | CHGA/CIDEA/DRD4/NRG1/IL1RN/IL6/INHBA/LGALS9/NOV/PARK2/PDE4C/PML/TRIM27/SCT/CCR2/TNFRSF4/RAB11FIP1/RSAD2/ADIPOQ                                                                                                                                                                                                                                                                                                                                                                                                                                                                                                                                                                                                                                                                                                                                                                                                                        | 19  |
| GO:0042060 | wound healing                            | 53/901  | 678/17046  | 0.00281 | 0.03536 | 0.02781 | CDH3/KCNMB2/MRVI1/NLRP6/A2M/F11/FGA/FGF10/FOXC2/GATM/GNAS/SCG3/GUCY1A3/ANXA2/SERPIND1/NRG1/IGF1/IGF2/CYR61/IL6/IRF1/ITGB2/KCNMB1/LCK/LOX/SMAD3/MAP3K1/NOV/NRAS/ANGPT4/PIK3CG/PKM/TREM1/APBB1IP/PRKAR1B/BIN3/MAPK3/PROC/TRPC7/BMP4/SLC8A1/TIMP3/TNFAIP3/TRPC6/WNT10B/C6orf25/CAPZB/HIST1H3A/HOPX/ACTN1/SYT7/ESAM/SLC16A3                                                                                                                                                                                                                                                                                                                                                                                                                                                                                                                                                                                                               | 53  |
| GO:0055074 | calcium ion homeostasis                  | 31/901  | 345/17046  | 0.00281 | 0.03536 | 0.02781 | TRDN/CCR1/ADM/DRD4/ESR1/NPTN/GPER1/ANXA6/KDR/LCK/ATP1A2/OPRL1/PDE6B/PIK3CG/PKH1/PML/CHRNA9/PRKD1/TRPC7/CCL11/BMP4/SLC8A1/TGM2/TRPC4/TRPC6/CCR2/CXCR4/CALR/ATP13A4/CASQ1/SMDT1                                                                                                                                                                                                                                                                                                                                                                                                                                                                                                                                                                                                                                                                                                                                                         | 31  |
| GO:0008154 | actin polymerization or depolymerization | 17/901  | 152/17046  | 0.00282 | 0.03536 | 0.02781 | ABI1/MSRB2/MTOR/TMOD4/FMN1/MAP3K1/SSH1/TTC17/ACTR3B/TRIM27/CCL11/MICAL1/CAPZB/SH3BGL3/GAS7/SCIN/MICAL2                                                                                                                                                                                                                                                                                                                                                                                                                                                                                                                                                                                                                                                                                                                                                                                                                                | 17  |

|            |                                                         |         |            |         |         |         |                                                                                                                                                                                                                                                                                                                                                                                                                                                                                                                                                                                                                                                                                                                                                                                                                                                                                            |     |
|------------|---------------------------------------------------------|---------|------------|---------|---------|---------|--------------------------------------------------------------------------------------------------------------------------------------------------------------------------------------------------------------------------------------------------------------------------------------------------------------------------------------------------------------------------------------------------------------------------------------------------------------------------------------------------------------------------------------------------------------------------------------------------------------------------------------------------------------------------------------------------------------------------------------------------------------------------------------------------------------------------------------------------------------------------------------------|-----|
| GO:1901652 | response to peptide                                     | 47/901  | 585/17046  | 0.00283 | 0.03538 | 0.02782 | TCIRG1/NPFFR2/ADCY3/AP351/ADM/CPS1/CTGF/CYP11A1/EGFR/EIF4G1/FGF10/RASA3/FOXC2/FOXO1/AKR1B1/MTOR/GATM/FGF22/GNAS/GPER1/GRB10/NRG1/NR4A1/IGF2/IL6/LCK/NRAS/PKM/PRKAG3/TLR9/PRKAR1B/LMBRD1/MAPK3/MAP2K2/PSMB4/PSMD7/PTPRE/PXN/RASGRF2/NOD2/VAMP2/TNFAIP3/MGAR/IRS2/ADIPOQ/RAPGEF2/FGF19                                                                                                                                                                                                                                                                                                                                                                                                                                                                                                                                                                                                       | 47  |
| GO:0034250 | positive regulation of cellular amide metabolic process | 11/901  | 79/17046   | 0.00284 | 0.03548 | 0.0279  | EEF2/LARP1/MTOR/PABPC1/BARHL2/CYR61/IL6/PRR16/PIWIL2/MAPK3/NOD2                                                                                                                                                                                                                                                                                                                                                                                                                                                                                                                                                                                                                                                                                                                                                                                                                            | 11  |
| GO:0030182 | neuron differentiation                                  | 95/901  | 1359/17046 | 0.00285 | 0.0355  | 0.02791 | FARP1/CDKN1C/SPON2/ZBTB18/TBR1/GPRIN1/CLN5/SEZ6/CNP/COL9A3/SCLT1/ADM/DNMT3A/EFNA2/EGFR/EIF4G1/EPHA1/EPHA3/EPHB4/FGF10/RASA3/BTBD3/SPG20/NFASC/EPB41L3/NEDD4L/PSD3/MAPK8IP2/DFNB31/TENM4/FGF22/NPTN/SOX8/KCNIP2/NRG1/HOXD3/HSP90AA1/HSP90AB1/ID3/RSP2/FMN1/BARHL2/IL6/INHBA/ISL1/HES5/STMN1/ARHGDI1/LLGL1/LHX8/NEU1/NRAS/NTF3/PALM/PARK2/LEF1/CEND1/ATP8A2/PITX2/SSH1/PPP1CC/PRKD1/MAPK3/MAP2K2/PSMB4/RGMA/TRPC7/PSMD7/TENM2/RASGRF2/S100A6/SGK1/BMP4/BMPR1B/SLIT1/SOX9/ZEB1/TRPC4/TRPC6/WNT10B/YWHAG/CACNB2/FZD5/LST1/CALR/PARD6B/GAS7/RUNX1/RUNX3/IRS2/ALDH1A2/CBFA2T2/RAPGEF2/ULK2/FGF19                                                                                                                                                                                                                                                                                                 | 95  |
| GO:0010629 | negative regulation of gene expression                  | 96/901  | 1376/17046 | 0.00287 | 0.03569 | 0.02807 | CDKN1C/C1D/ZBTB18/CELF1/CCR1/CTGF/SMYD1/CYLD/RNF168/ZNF366/DNMT3A/PATL2/A2M/ELK4/ESR1/SBNO2/ACIN1/FOXC2/FOXO1/DIP2A/FLOT2/NEDD4L/PUM2/RYPB/PABPC1/DKK3/GPER1/SOX8/NRG1/HMGA1/HOXB3/ID3/IRF1/ISL1/HILS1/HES5/LGALS9/SMAD3/MITF/MOV10/PARK2/LEF1/SIRT6/PITX2/PKHD1/PML/RIPPLY3/TLR9/PIWIL2/PRMT6/DNAJC17/CNOT11/MAP2K2/MASP1/TENM2/GATAD2B/METTL14/CCAR2/CREBZF/TRIM27/NOD2/SFRP2/GZF1/BMP4/ZNF649/SOX9/TBP/ZEB1/TNFAIP3/TWIST1/TNFRSF4/WNT10B/ZNF177/ZC3H14/ZC3H12A/CPEB4/CALR/SCRT1/HIST1H3A/SLA2/NROB2/HOPX/KDM2B/LOXL3/CBX2/TP63/RUNX3/LIMD1/ER1/PIAS2/CBFA2T2/AURKB/ADIPOQ/H2AFY/FGF19/NR1H4                                                                                                                                                                                                                                                                                            | 96  |
| GO:0007399 | nervous system development                              | 143/901 | 2174/17046 | 0.0029  | 0.03582 | 0.02817 | FARP1/CDKN1C/SPON2/ZBTB18/TACC2/TBR1/GPRIN1/CLN5/SEZ6/CNP/COL9A3/SCLT1/ADM/ZNF358/APCDD1/CYP11A1/DLG2/DNMT3A/EFNA2/EGFR/EGR3/EIF4G1/EML1/EPHA1/EPHA3/EPHB4/FGF10/RASA3/BTBD3/SPG20/NFASC/EPB41L3/NEDD4L/PSD3/MAPK8IP2/MTOR/DFNB31/TENM4/FGF22/NPTN/SDCBP2/GPER1/GSTP1/NME7/SOX8/KCNIP2/NRG1/HLX/HPCA/APBA2/HOXB3/HOXD3/HSP90AA1/HSP90AB1/HTR5A/ID3/RSP2/FMN1/BARHL2/IGF1/IL6/INHBA/ISL1/ACAT1/AMIGO3/INSC/HES5/SLC6A17/STMN1/ARHGDI1/LLGL1/MEF2D/LHX8/NEU1/NHLH2/NRAS/NTF3/PALM/PARK2/UTP11L/LEF1/CEND1/ATP8A2/PITX2/SSH1/MXRA8/PPP1CC/ELP3/IFT122/CSGALNACT1/PRKD1/MAPK3/MAP2K2/PSMB4/RGMA/TRPC7/PSMD7/TENM2/MARK4/RASGRF2/S100A6/SCT/SFRP2/TRA2B/SGK1/BMP4/SLC8A1/BMPR1B/SLIT1/BOK/SOX9/STK3/ZEB1/TIMP3/TRPC4/TRPC6/TWIST1/WNT10B/YWHAG/CACNB2/PAX8/CXCR4/FZD5/LST1/CALR/COLQ/CAST/SCRT1/PARD6B/TTBK1/KDM2B/GAS7/RUNX1/TP63/RUNX3/IRS2/ALDH1A2/SPHK1/CBFA2T2/ARHGEF10/RAPGEF2/ULK2/FGF19 | 143 |
| GO:0070167 | regulation of biomineral tissue development             | 10/901  | 68/17046   | 0.0029  | 0.03582 | 0.02817 | CCR1/FAM101A/SMAD3/BGLAP/BMP4/SLC8A1/BMPR1B/SOX9/TWIST1/WNT10B                                                                                                                                                                                                                                                                                                                                                                                                                                                                                                                                                                                                                                                                                                                                                                                                                             | 10  |
| GO:0071260 | cellular response to mechanical stimulus                | 10/901  | 68/17046   | 0.0029  | 0.03582 | 0.02817 | IRF1/MAP3K1/ATP1A2/MAPK3/BMP4/SOX9/TLR5/TNFRSF1A/CRADD/FADD                                                                                                                                                                                                                                                                                                                                                                                                                                                                                                                                                                                                                                                                                                                                                                                                                                | 10  |
| GO:0032101 | regulation of response to external stimulus             | 60/901  | 790/17046  | 0.00295 | 0.03612 | 0.0284  | CDH13/TBR1/CCR1/NLRP6/A2M/F11/FGA/FGF10/SBNO2/ACIN1/LARP1/PUM2/MTOR/SLC37A4/GPER1/FFAR2/GSTP1/ANXA2/HK1/IL1R1/IL6/IL16/ISL1/KDR/LCK/LGALS9/SMAD3/NOV/NTF3/PARK2/PDE6B/PIK3CG/PLA2G2A/PML/IL20RB/TLR9/TREM1/PRKD1/MAP2K2/PROC/MASP1/HTRA1/PSMB4/NOD2/STAT2/TNFAIP3/TNFRSF1A/CCR2/CA7/CXCR4/FZD5/RAB7A/NLRX1/CALR/HIST1H3A/HOPX/TNFRSF11A/ADIPOQ/LY86/NUP93                                                                                                                                                                                                                                                                                                                                                                                                                                                                                                                                  | 60  |
| GO:0048598 | embryonic morphogenesis                                 | 46/901  | 571/17046  | 0.00296 | 0.03612 | 0.0284  | CDKN1C/GJB6/COL11A1/ADM/ZNF358/ECE1/SP8/FGF10/FOXC2/TENM4/GNAS/FLVCR1/SOX8/HLX/HOXB3/HOXC4/HOXD3/RSP2/CYR61/IL1RN/INHBA/ITGA7/ITGB2/HES5/AFF3/LAMA3/SMAD3/LEF1/ATP8A2/PITX2/CHRNA9/IFT122/STRA6/SFRP2/BMP4/SOX9/STK3/ZEB1/TWIST1/PAX8/FZD5/KDM2B/TP63/ALDH1A2/ADIPOQ/MICAL2                                                                                                                                                                                                                                                                                                                                                                                                                                                                                                                                                                                                                | 46  |
| GO:0005979 | regulation of glycogen biosynthetic process             | 6/901   | 28/17046   | 0.00297 | 0.03612 | 0.0284  | MTOR/GRB10/IGF1/IGF2/PPP1CB/IRS2                                                                                                                                                                                                                                                                                                                                                                                                                                                                                                                                                                                                                                                                                                                                                                                                                                                           | 6   |
| GO:0010962 | regulation of glucan biosynthetic process               | 6/901   | 28/17046   | 0.00297 | 0.03612 | 0.0284  | MTOR/GRB10/IGF1/IGF2/PPP1CB/IRS2                                                                                                                                                                                                                                                                                                                                                                                                                                                                                                                                                                                                                                                                                                                                                                                                                                                           | 6   |
| GO:0034698 | response to gonadotropin                                | 6/901   | 28/17046   | 0.00297 | 0.03612 | 0.0284  | CYP11A1/EGR3/GJB2/INHBA/LHCGR/PAX8                                                                                                                                                                                                                                                                                                                                                                                                                                                                                                                                                                                                                                                                                                                                                                                                                                                         | 6   |
| GO:0002698 | negative regulation of immune effector process          | 12/901  | 91/17046   | 0.00297 | 0.03612 | 0.0284  | A2M/HLA-B/HLA-E/HLX/LGALS9/IL20RB/MASP1/HTRA1/NOD2/BST2/CCR2/NLRX1                                                                                                                                                                                                                                                                                                                                                                                                                                                                                                                                                                                                                                                                                                                                                                                                                         | 12  |

|            |                                                                         |        |            |         |         |         |                                                                                                                                                                                                                                                                                                                                                                                                                                                                                                                                                            |    |
|------------|-------------------------------------------------------------------------|--------|------------|---------|---------|---------|------------------------------------------------------------------------------------------------------------------------------------------------------------------------------------------------------------------------------------------------------------------------------------------------------------------------------------------------------------------------------------------------------------------------------------------------------------------------------------------------------------------------------------------------------------|----|
| GO:0042307 | positive regulation of protein import into nucleus                      | 12/901 | 91/17046   | 0.00297 | 0.03612 | 0.0284  | EGFR/HSP90AB1/IGF1/IL6/JUP/IPO5/LGALS9/SMAD3/TLR9/SFRP2/BMP4/SPHK1                                                                                                                                                                                                                                                                                                                                                                                                                                                                                         | 12 |
| GO:1904018 | positive regulation of vasculature development                          | 14/901 | 115/17046  | 0.00297 | 0.03612 | 0.0284  | CHI3L1/ADM/EPHA1/FOXC2/ISL1/KDR/ANGPT4/PRKD1/CCL11/SFRP2/TWIST1/RUNX1/SPHK1/RAPGEF2                                                                                                                                                                                                                                                                                                                                                                                                                                                                        | 14 |
| GO:0006874 | cellular calcium ion homeostasis                                        | 30/901 | 332/17046  | 0.003   | 0.03643 | 0.02865 | TRDN/CCR1/ADM/DRD4/ESR1/NPTN/GPER1/ANXA6/LCK/ATP1A2/OPRL1/PDE6B/PIK3CG/PKHD1/PML/CHRNA9/PRKD1/TRPC7/CCL11/BMP4/SLC8A1/TGM2/TRPC4/TRPC6/CCR2/CXCR4/CALR/ATP13A4/CASQ1/SMDT1                                                                                                                                                                                                                                                                                                                                                                                 | 30 |
| GO:0007519 | skeletal muscle tissue development                                      | 17/901 | 153/17046  | 0.00302 | 0.0365  | 0.0287  | ZBTB18/CHRNA1/SMYD1/FLNB/VGLL2/SOX8/HLX/MEF2D/MEOX2/NFATC3/NRAS/PITX2/PLAGL1/BIN3/TWIST1/WNT10B/CASQ1                                                                                                                                                                                                                                                                                                                                                                                                                                                      | 17 |
| GO:0030799 | regulation of cyclic nucleotide metabolic process                       | 17/901 | 153/17046  | 0.00302 | 0.0365  | 0.0287  | NPFRR2/ADM/ADRB3/DRD4/GABBR1/GNAS/GPER1/GUCY1A3/HPCA/LHCGR/MC2R/NPPC/OPRL1/PALM/MRAP/SCT/CCR2                                                                                                                                                                                                                                                                                                                                                                                                                                                              | 17 |
| GO:0060485 | mesenchyme development                                                  | 21/901 | 206/17046  | 0.00304 | 0.03663 | 0.02881 | EPHA3/FGF10/FOXC2/SOX8/NRG1/ISL1/SMAD3/MEOX1/LEF1/PITX2/BNC2/ACTA2/S100A4/SFRP2/BMP4/SOX9/ACTC1/TWIST1/LOXL3/ALDH1A2/FGF19                                                                                                                                                                                                                                                                                                                                                                                                                                 | 21 |
| GO:0048608 | reproductive structure development                                      | 34/901 | 391/17046  | 0.00308 | 0.03704 | 0.02913 | CDKN1C/COL9A3/ZFP42/ADM/CYP11A1/EGFR/ESR1/FGF10/GJB2/SOX8/HSD17B2/HSP90AB1/IGF1/CYR61/INHBA/KDR/LHCGR/MC2R/LHX8/LEF1/PITX2/HTRA1/STRA6/SFRP2/BMP4/SLC8A1/BMPR1B/BOK/SOX9/STK3/TLR5/PHLDA2/FZD5/TP63                                                                                                                                                                                                                                                                                                                                                        | 34 |
| GO:0043122 | regulation of I-kappaB kinase/NF-kappaB signaling                       | 22/901 | 220/17046  | 0.00311 | 0.03717 | 0.02923 | MIB2/CYLD/NLRP6/ESR1/GSTP1/LGALS9/NOV/PARK2/TLR9/ZDHHC13/PRKD1/PLEKHG5/S100A4/NOD2/BST2/TNFAIP3/TNFRSF1A/TRAF5/NLRX1/FADD/SPHK1/ADIPOQ                                                                                                                                                                                                                                                                                                                                                                                                                     | 22 |
| GO:0045934 | negative regulation of nucleobase-containing compound metabolic process | 90/901 | 1280/17046 | 0.00311 | 0.03717 | 0.02923 | CDKN1C/C1D/ZBTB18/SMYD1/CYLD/RNF168/ZNF366/DNMT3A/DRD4/ELK4/ESR1/SBNO2/ACIN1/FOXC2/FOXO1/NEDD4L/RYPB/GABBR1/PABPC1/DNAJC2/DKK3/GPER1/DNAJC15/GZMA/SOX8/NRG1/HMGA1/HPCA/HOXB3/HOXC6/ID3/IRF1/ISL1/HILS1/HES5/SMAD3/MITF/NPPC/OPRL1/PALM/LEF1/SIRT6/PITX2/PKHD1/PML/RIPPLY3/TLR9/PRMT6/DNAJC17/TENM2/GATAD2B/CCAR2/CREBZF/TRIM27/NOD2/SFRP2/GZF1/BMP4/ZNF649/SOX9/TBP/ZEB1/TERF1/TNFAIP3/TWIST1/CCR2/TNFRSF4/WNT10B/ZNF177/ZC3H14/ZC3H12A/CALR/SLIRP/SCRT1/HIST1H3A/SLA2/NROB2/HOPX/KDM2B/LOXL3/CBX2/TP63/RUNX3/LIMD1/PIAS2/CBFA2T2/AURKB/ADIPOQ/H2AFY/NR1H4 | 90 |
| GO:0030326 | embryonic limb morphogenesis                                            | 15/901 | 128/17046  | 0.00311 | 0.03717 | 0.02923 | ZNF358/ECE1/SP8/GNAS/FLVCR1/RSP02/AFF3/LEF1/PITX2/IFT122/SFRP2/BMP4/TWIST1/TP63/ALDH1A2                                                                                                                                                                                                                                                                                                                                                                                                                                                                    | 15 |
| GO:0035113 | embryonic appendage morphogenesis                                       | 15/901 | 128/17046  | 0.00311 | 0.03717 | 0.02923 | ZNF358/ECE1/SP8/GNAS/FLVCR1/RSP02/AFF3/LEF1/PITX2/IFT122/SFRP2/BMP4/TWIST1/TP63/ALDH1A2                                                                                                                                                                                                                                                                                                                                                                                                                                                                    | 15 |
| GO:0006954 | inflammatory response                                                   | 47/901 | 588/17046  | 0.00312 | 0.03717 | 0.02923 | KLRG1/CHI3L1/CCR1/PARP4/NLRP6/A2M/UNC13D/FGA/SBNO2/GPER1/FFAR2/GSTP1/HRH1/IL1R1/IL1RN/IL6/ISL1/ITGB2/TIHA/LGALS9/SMAD3/NFATC3/NOV/PIK3CG/PLA2G2A/IL20RB/TLR9/PRKD1/MASP1/PSMB4/CCL11/CCL17/NOD2/BMPR1B/TLR5/TNFAIP3/TNFRSF1A/CCR2/TNFRSF4/CXCR4/NLRX1/IL1F10/TNFRSF11A/SPHK1/CCR2/ADIPOQ/LY86                                                                                                                                                                                                                                                              | 47 |
| GO:0030004 | cellular monovalent inorganic cation homeostasis                        | 11/901 | 80/17046   | 0.00314 | 0.03734 | 0.02937 | TCIRG1/CLN5/NEDD4L/ATP1A2/ATP5B/SLAMF8/SGK1/SLC4A1/SLC8A1/CA7/RAB7A                                                                                                                                                                                                                                                                                                                                                                                                                                                                                        | 11 |
| GO:0051235 | maintenance of location                                                 | 21/901 | 207/17046  | 0.00322 | 0.03818 | 0.03003 | TRDN/CIDEA/FITM1/EPB41L3/FLNB/SYNE1/MORC3/FFAR2/HK1/ACACB/IL6/JUP/LCK/LTPB1/PML/SLC30A10/ABHD4/ZC3H12A/CALR/CASQ1/SCIN                                                                                                                                                                                                                                                                                                                                                                                                                                     | 21 |
| GO:0008015 | blood circulation                                                       | 35/901 | 407/17046  | 0.00323 | 0.03825 | 0.03008 | KCNMB2/MRVI1/TRDN/CELFG/CHGA/ADM/CPS1/CTGF/ADRB3/ABAT/ECE1/FGA/FOXC2/BMP10/GPER1/GUCY1A3/KCNIP2/HRH1/JUP/KCNH2/KCNJ8/MEOX2/MYL2/ATP1A2/NPPC/OPRL1/PIK3CG/POMC/ACTA2/SGK1/SLC8A1/ACTC1/CACNA1E/HOPX/ADIPOQ                                                                                                                                                                                                                                                                                                                                                  | 35 |

|            |                                                 |         |            |         |         |         |                                                                                                                                                                                                                                                                                                                                                                                                                                                                                                                                                                                                                                                                         |     |
|------------|-------------------------------------------------|---------|------------|---------|---------|---------|-------------------------------------------------------------------------------------------------------------------------------------------------------------------------------------------------------------------------------------------------------------------------------------------------------------------------------------------------------------------------------------------------------------------------------------------------------------------------------------------------------------------------------------------------------------------------------------------------------------------------------------------------------------------------|-----|
| GO:0072234 | metanephric nephron tubule development          | 5/901   | 20/17046   | 0.00325 | 0.03845 | 0.03024 | SOX8/ACAT1/HESS/SOX9/PAX8                                                                                                                                                                                                                                                                                                                                                                                                                                                                                                                                                                                                                                               | 5   |
| GO:0050801 | ion homeostasis                                 | 50/901  | 636/17046  | 0.00327 | 0.03854 | 0.03031 | TCIRG1/TRDN/CLN5/CCR1/ADM/CPS1/DRD4/ESR1/NEDD4L/STEAP2/NPTN/GPER1/FLVCR1/ANXA6/KCNH2/KDR/LCK/MFI2/NUBP1/ATP1A2/OPRL1/ATP5B/PARK2/PDE6B/PIK3CG/PKHD1/PML/SLC30A10/CHRNA9/PRKD1/SLAMF8/TRPC7/CCL11/SGK1/BMP4/SLC4A1/SLC8A1/SLC9A3/TGM2/TRPC4/TRPC6/CCR2/CA7/CXCR4/RAB7A/CALR/ATP13A4/CASQ1/SMDT1/MTL5                                                                                                                                                                                                                                                                                                                                                                     | 50  |
| GO:0044711 | single-organism biosynthetic process            | 107/901 | 1567/17046 | 0.00329 | 0.03875 | 0.03047 | CDH3/TCIRG1/MTHFS/NPFFR2/ADCY3/SLC27A2/ERLIN2/B4GALT7/ACOT7/MRPL52/ADM/CPS1/CTGF/PPM11/MBOAT1/ADRB3/CYP11A1/FITM1/ADAL/DBB1/ABAT/DPH1/DRD4/AGXT/EEF2/ENO2/ALAS1/FOXO1/AKR1B1/MTOR/GABBR1/ST6GALNAC3/GATM/GBGT1/GAPDHS/AMPD2/DKK3/GLS2/AMPD3/GNAS/PIGW/GPER1/GRB10/MRPS18B/GSTP1/GUCY1A3/NME7/PADI1/HAS1/ACACB/HPCA/HRH1/HSD11B1/HSD17B2/ACADL/NME9/IGF1/IGF2/CYR61/IL6/ACAT1/LDLR/LHCGR/MC2R/ME1/NPPC/OAS2/OPRL1/ATP5B/PALM/CHST15/PGAM2/PIGC/PIK3CG/PKM/PLA2G2A/PRKAG3/PML/CYTL1/LPCAT2/PPP1CB/VAC14/CSGALNACT1/PRKD1/MRAP/RFC2/RPA3/SCT/MRPS14/BMP4/TERF1/CCR2/UPP1/CERS4/QTRT1/KMO/IRS2/ALDH1A2/SYNJ2/SPHK1/CH25H/SDR42E1/ADIPOQ/RAPGEF2/LPGAT1/FGF19/NR1H4          | 107 |
| GO:0055002 | striated muscle cell development                | 15/901  | 129/17046  | 0.00336 | 0.03941 | 0.03099 | SPEG/BMP10/TMOD4/IGF1/LMNA/MYL2/NFATC3/LEF1/PITX2/BIN3/BMP4/SLC8A1/ACTC1/WNT10B/CASQ1                                                                                                                                                                                                                                                                                                                                                                                                                                                                                                                                                                                   | 15  |
| GO:0035137 | hindlimb morphogenesis                          | 7/901   | 38/17046   | 0.00337 | 0.03941 | 0.03099 | GNAS/RSPO2/FMN1/AFF3/PITX2/BMP4/TWIST1                                                                                                                                                                                                                                                                                                                                                                                                                                                                                                                                                                                                                                  | 7   |
| GO:0072210 | metanephric nephron development                 | 7/901   | 38/17046   | 0.00337 | 0.03941 | 0.03099 | SOX8/FMN1/HESS/BMP4/SOX9/PAX8/ADIPOQ                                                                                                                                                                                                                                                                                                                                                                                                                                                                                                                                                                                                                                    | 7   |
| GO:0051223 | regulation of protein transport                 | 53/901  | 684/17046  | 0.00337 | 0.03941 | 0.03099 | CIDEA/SLC51B/CYLD/ABAT/DRD4/EGFR/FGA/EXPH5/MTOR/GLS2/GNAS/GPR26/GPER1/FFAR2/NRG1/ANXA13/HLA-E/HPCA/HSPA1L/HSP90AB1/IGF1/IL6/ISL1/JUP/IPO5/LCP1/LGALS9/LLGL1/SMAD3/NOV/PARK2/PDE4C/PML/TLR9/GOLPH3L/SYBU/PRKAR1B/TRIM27/NOD2/SFRP2/BMP4/VAMP2/TWIST1/TNFRSF4/CACNA1E/FZD5/RAB11FIP1/NR0B2/IRS2/SPHK1/SYT7/RSAD2/ADIPOQ                                                                                                                                                                                                                                                                                                                                                   | 53  |
| GO:1904035 | regulation of epithelial cell apoptotic process | 8/901   | 48/17046   | 0.00339 | 0.03954 | 0.03109 | FGA/GPER1/IL6/KDR/BMP4/TNFAIP3/COL18A1/CAST                                                                                                                                                                                                                                                                                                                                                                                                                                                                                                                                                                                                                             | 8   |
| GO:0043410 | positive regulation of MAPK cascade             | 45/901  | 560/17046  | 0.00342 | 0.03978 | 0.03128 | CHI3L1/CCR1/MAP3K8/CTGF/ADRB3/DRD4/EGFR/FGA/FGF10/RASA3/MAPK8IP2/FGF22/GPER1/NRG1/IGF1/IGF2/IL1RN/IL6/KDR/LGALS9/MAP3K1/NRAS/NTF3/PIK3CG/PLA2G2A/TLR9/MAPK3/MAP2K2/PSMB4/PSMD7/PXN/RASGRF2/CCL11/CCL17/NOD2/BMP4/STK3/CXCR4/FZD5/CDK10/IRS2/TNFRSF11A/MAP3K6/RAPGEF2/FGF19                                                                                                                                                                                                                                                                                                                                                                                              | 45  |
| GO:0031347 | regulation of defense response                  | 55/901  | 716/17046  | 0.00342 | 0.03978 | 0.03128 | TANK/MAP3K8/CYLD/COCH/NLRP6/DMBT1/A2M/SBNO2/ACIN1/PUM2/SLC37A4/GPER1/FFAR2/GSTP1/HLA-B/HLA-E/HSP90AB1/IL1R1/IL6/IRF1/ISL1/ITGB2/LCK/LGALS9/SMAD3/MAP3K1/NFATC3/NOV/NRAS/PIK3CG/PLA2G2A/PML/IL20RB/TLR9/TREM1/MAPK3/MASP1/HTRA1/PSMB4/PSMD7/NOD2/STAT2/TLR5/TNFAIP3/TNFRSF1A/CCR2/CA7/NLRX1/UNC93B1/HIST1H3A/FADD/TNFRSF11A/RSAD2/ADIPOQ/NUP93                                                                                                                                                                                                                                                                                                                           | 55  |
| GO:0055001 | muscle cell development                         | 16/901  | 142/17046  | 0.00343 | 0.03979 | 0.03129 | SPEG/ADM/BMP10/TMOD4/IGF1/LMNA/MYL2/NFATC3/LEF1/PITX2/BIN3/BMP4/SLC8A1/ACTC1/WNT10B/CASQ1                                                                                                                                                                                                                                                                                                                                                                                                                                                                                                                                                                               | 16  |
| GO:0006811 | ion transport                                   | 99/901  | 1435/17046 | 0.00346 | 0.03999 | 0.03145 | KCNMB2/TCIRG1/TRDN/SLC27A2/CHRNA1/CHRNA2/CHRNA5/PANX3/CLCA1/CCR1/SLC51B/C15orf27/SLC38A10/TRPM6/CTGF/TRPV3/BHLHA15/DRD4/AGXT/SLC10A4/RASA3/MLC1/ATP11A/NEDD4L/MAPK8IP2/STEAP2/SLC17A5/GLS2/CRACR2B/GPER1/GRIK4/KCNIP2/ANXA6/ACACB/HTR3A/IL1RN/AQP2/AQP5/AQP9/ATP9B/KCNH2/KCNJ8/KCNJ9/KCNMB1/SLC6A17/LCK/LDLR/MFI2/ATP1A2/NFATC3/OPRL1/SLC22A18/P2RY6/ATP5B/ANO7/PARK2/PCYOX1/ATP8A2/PIK3CG/PML/FXYD6/SLCO1C1/TLR9/ZDHHC13/SLC47A1/TRPV6/SLC30A10/CHRNA9/PRKD1/TRPV5/TRPC7/RASGRF2/TRIM27/S100A6/SGK1/BMP4/SLC4A1/SLC6A12/SLC8A1/SLC9A3/SLC20A2/VAMP2/TRAPPC10/TRPC4/TRPC6/TRPM2/TWIST1/UCP1/CA7/CACNA1E/CACNB2/ATP13A4/CASQ1/SLC43A1/IRS2/TNFRSF11A/SLC16A3/SMDT1/NR1H4 | 99  |
| GO:0003013 | circulatory system process                      | 35/901  | 409/17046  | 0.00349 | 0.04033 | 0.03172 | KCNMB2/MRV1/TRDN/CELF2/CHGA/ADM/CPS1/CTGF/ADRB3/ABAT/ECE1/FGA/FOXO2/BMP10/GPER1/GUCY1A3/KCNIP2/HRH1/JUP/KCNH2/KCNJ8/MEOX2/MYL2/ATP1A2/NPPC/OPRL1/PIK3CG/POMC/ACTA2/SGK1/SLC8A1/ACTC1/CACNA1E/HOPX/ADIPOQ                                                                                                                                                                                                                                                                                                                                                                                                                                                                | 35  |
| GO:0055065 | metal ion homeostasis                           | 42/901  | 515/17046  | 0.00354 | 0.04084 | 0.03212 | TCIRG1/TRDN/CCR1/ADM/DRD4/ESR1/NEDD4L/STEAP2/NPTN/GPER1/FLVCR1/ANXA6/KCNH2/KDR/LCK/MFI2/NUBP1/ATP1A2/OPRL1/PARK2/PDE6B/PIK3CG/PKHD1/PML/SLC30A10/CHRNA9/PRKD1/TRPC7/CCL11/SGK1/BMP4/SLC8A1/TGM2/TRPC4/TRPC6/CCR2/CXCR4/CALR/ATP13A4/CASQ1/SMDT1/MTL5                                                                                                                                                                                                                                                                                                                                                                                                                    | 42  |
| GO:1904591 | positive regulation of protein import           | 12/901  | 93/17046   | 0.00356 | 0.0409  | 0.03216 | EGFR/HSP90AB1/IGF1/IL6/JUP/IPO5/LGALS9/SMAD3/TLR9/SFRP2/BMP4/SPHK1                                                                                                                                                                                                                                                                                                                                                                                                                                                                                                                                                                                                      | 12  |
| GO:0035116 | embryonic hindlimb morphogenesis                | 6/901   | 29/17046   | 0.00358 | 0.0409  | 0.03216 | GNAS/RSPO2/AFF3/PITX2/BMP4/TWIST1                                                                                                                                                                                                                                                                                                                                                                                                                                                                                                                                                                                                                                       | 6   |

|            |                                                                  |         |            |         |         |         |                                                                                                                                                                                                                                                                                                                                                                                                                                                                                                                                                                                                                                                                                                                                                                                                                                                                                    |     |
|------------|------------------------------------------------------------------|---------|------------|---------|---------|---------|------------------------------------------------------------------------------------------------------------------------------------------------------------------------------------------------------------------------------------------------------------------------------------------------------------------------------------------------------------------------------------------------------------------------------------------------------------------------------------------------------------------------------------------------------------------------------------------------------------------------------------------------------------------------------------------------------------------------------------------------------------------------------------------------------------------------------------------------------------------------------------|-----|
| GO:0060740 | prostate gland epithelium morphogenesis                          | 6/901   | 29/17046   | 0.00358 | 0.0409  | 0.03216 | ESR1/FGF10/IGF1/BMP4/SOX9/TP63                                                                                                                                                                                                                                                                                                                                                                                                                                                                                                                                                                                                                                                                                                                                                                                                                                                     | 6   |
| GO:0061036 | positive regulation of cartilage development                     | 6/901   | 29/17046   | 0.00358 | 0.0409  | 0.03216 | BMP10/CYR61/SMAD3/BMP4/BMPR1B/SOX9                                                                                                                                                                                                                                                                                                                                                                                                                                                                                                                                                                                                                                                                                                                                                                                                                                                 | 6   |
| GO:0009890 | negative regulation of biosynthetic process                      | 95/901  | 1370/17046 | 0.0036  | 0.04105 | 0.03228 | CDKN1C/C1D/ZBTB18/CELF1/ERLIN2/SMYD1/CYLD/RNF168/ZNF366/DNMT3A/DRD4/PATL2/ELK4/ESR1/SBNO2/FOXC2/FOXO1/NEDD4L/RYPB/GABBR1/DNAJC2/DKK3/GPER1/GRB10/GSTP1/SOX8/NRG1/HMGA1/HPCA/HOXB3/HOXC6/ACADL/ID3/IL6/INHBA/IRF1/ISL1/HILS1/HES5/SMAD3/MITF/OPRL1/PALM/LEF1/SIRT6/PITX2/PKHD1/PML/RIPPLY3/TLR9/PRMT6/DNAJC17/TENM2/GATAD2B/METTL14/CCAR2/CREBZF/TRIM27/NOD2/SFRP2/GZF1/BMP4/ZNF649/SOX9/TBP/ZEB1/TERF1/TNFAIP3/TWIST1/CCR2/TNFRSF4/WNT10B/ZNF177/ZC3H12A/CPEB4/CALR/SCRT1/HIST1H3A/SLA2/NROB2/HOPX/KDM2B/LOXL3/CBX2/TP63/RUNX3/LIMD1/PIAS2/CBFA2T2/AURKB/ADIPOQ/H2AFY/RAPGEF2/FGF19/NR1H4                                                                                                                                                                                                                                                                                          | 95  |
| GO:0061458 | reproductive system development                                  | 34/901  | 395/17046  | 0.00361 | 0.04116 | 0.03237 | CDKN1C/COL9A3/ZFP42/ADM/CYP11A1/EGFR/ESR1/FGF10/GJB2/SOX8/HSD17B2/HSP90A1/IGF1/CYR61/INHBA/KDR/LHCGR/MC2R/LHX8/LEF1/PITX2/HTRA1/STRA6/SFRP2/BMP4/SLC8A1/BMPR1B/BOK/SOX9/STK3/TLR5/PHLDA2/FZD5/TP63                                                                                                                                                                                                                                                                                                                                                                                                                                                                                                                                                                                                                                                                                 | 34  |
| GO:0030595 | leukocyte chemotaxis                                             | 18/901  | 169/17046  | 0.00366 | 0.04167 | 0.03277 | CHGA/CCR1/FFAR2/HRH1/IL6/IL16/ITGB2/LGALS9/NOV/PIK3CG/TREM1/CCL11/CCL17/NOD2/CCR2/CXCR4/CALR/TNFRSF11A                                                                                                                                                                                                                                                                                                                                                                                                                                                                                                                                                                                                                                                                                                                                                                             | 18  |
| GO:0048762 | mesenchymal cell differentiation                                 | 17/901  | 156/17046  | 0.00369 | 0.04182 | 0.03289 | EPHA3/FGF10/FOXC2/SOX8/NRG1/ISL1/SMAD3/LEF1/PITX2/S100A4/SFRP2/BMP4/SOX9/TWIST1/LOXL3/ALDH1A2/FGF19                                                                                                                                                                                                                                                                                                                                                                                                                                                                                                                                                                                                                                                                                                                                                                                | 17  |
| GO:0019318 | hexose metabolic process                                         | 23/901  | 237/17046  | 0.00369 | 0.04182 | 0.03289 | GALM/B3GLCT/ENO2/FOXO1/AKR1B1/MTOR/FUCA1/SLC37A4/GAPDHS/GRB10/HK1/IGF1/IGF2/IL6/PARK2/CHST15/PGAM2/PKM/POMC/PPP1CB/PHLDA2/IRS2/ADIPOQ                                                                                                                                                                                                                                                                                                                                                                                                                                                                                                                                                                                                                                                                                                                                              | 23  |
| GO:0050727 | regulation of inflammatory response                              | 24/901  | 251/17046  | 0.0037  | 0.04182 | 0.03289 | NLRP6/A2M/SBNO2/GPER1/FFAR2/GSTP1/IL1R1/IL6/ISL1/SMAD3/NOV/PIK3CG/PLA2G2A/IL20RB/TLR9/MASP1/PSMB4/NOD2/TNFAIP3/TNFRSF1A/CCR2/NLRX1/TNFRSF11A/ADIP1/OQ                                                                                                                                                                                                                                                                                                                                                                                                                                                                                                                                                                                                                                                                                                                              | 24  |
| GO:0031324 | negative regulation of cellular metabolic process                | 141/901 | 2154/17046 | 0.00371 | 0.04182 | 0.03289 | FARP1/CDKN1C/C1D/ZBTB18/CELF1/ERLIN2/CARD16/CSTA/SMYD1/CYLD/RNF168/ZNF366/NLRP6/DLG2/DNMT3A/DRD4/PATL2/A2M/ELK4/EPHA1/ESR1/FHIT/PPM1E/SBNO2/ACIN1/FOXC2/FOXO1/NEDD4L/RYPB/MTOR/GABBR1/PABPC1/DNAJC2/DKK3/GPER1/GRB10/DNAJC15/GSTP1/GZMA/ANXA2/SERPIND1/SOX8/NRG1/HMGA1/ACACB/HPCA/HOXB3/HOXC6/ACADL/HSP90A1/ID3/COL28A1/IGF1/IL6/INHBA/IRF1/ISL1/ITIH3/ITIH4/HILS1/KIF25/HES5/SMAD3/MITF/NPPC/NTF3/OPRL1/PALM/PARK2/SPOCK3/LEF1/SIRT6/PI3/PIK3CG/PITX2/PKHD1/PML/RIPPLY3/TLR9/PRMT6/DNAJC17/PRKAR1B/MASP1/PSMB4/PSMD7/TENM2/GATAD2B/METTL14/CCAR2/CREBZF/TRIM27/NOD2/SFRP2/GZF1/BMP4/ZNF649/SOX9/SUPT6H/BST2/TBP/ZEB1/TERF1/TIMP3/TNFAIP3/TWIST1/CCR2/TNFRSF4/WNT10B/YWHAG/ZNF177/ZC3H14/ZC3H12A/CPEB4/CALR/SLIRP/CAST/SCRT1/HIST1H3A/SLA2/NROB2/HOPX/SPINK7/KDM2B/LOXL3/CBX2/TP63/RUNX3/SERPINA6/IRS2/FADD/LIMD1/PIAS2/CBFA2T2/AURKB/DAPL1/ADIPOQ/H2AFY/N4BP1/RAPGEF2/FGF19/NR1H4 | 141 |
| GO:0006941 | striated muscle contraction                                      | 14/901  | 118/17046  | 0.00376 | 0.04213 | 0.03313 | CHRNA1/CTGF/DTNA/BMP10/KCNH2/MYL2/ATP1A2/ATP8A2/PGAM2/PIK3CG/SLC8A1/ACTC1/CASQ1/RCSD1                                                                                                                                                                                                                                                                                                                                                                                                                                                                                                                                                                                                                                                                                                                                                                                              | 14  |
| GO:0007169 | transmembrane receptor protein tyrosine kinase signaling pathway | 65/901  | 879/17046  | 0.00377 | 0.04213 | 0.03313 | ABI1/CDH3/CDH13/TCIRG1/ADCY3/LECT1/ESM1/AP3S1/IL31RA/CTGF/EFNA2/EGFR/EIF4G1/EPHA1/EPHA3/EPHB4/FGF10/RASA3/FOXC2/FOXO1/ARHGEF18/MTOR/FGF22/NPTN/GPER1/GRB10/NRG1/NR4A1/HSP90AA1/IGF1/IGF2/JUP/KDR/LCK/ARHGDI1/MOV10/NRAS/NTF3/ARHGEF3/ANGPT4/PRKAG3/TLR9/PRKAR1B/LMBRD1/PAG1/PRKD1/MAPK3/MAK2K2/PSMB4/PSMD7/PLEKHG5/PTPRE/PXN/RASGRF2/RIT2/SOX9/ZAP70/RAB7A/TMEM204/IRS2/SPHK1/CD8A/ADIPOQ/RAPGEF2/FGF19                                                                                                                                                                                                                                                                                                                                                                                                                                                                            | 65  |
| GO:0009617 | response to bacterium                                            | 38/901  | 456/17046  | 0.00377 | 0.04213 | 0.03313 | SPON2/GJB6/CHGA/CNP/ADM/CPS1/CYP11A1/COCH/NLRP6/DMBT1/FGA/FGF10/SBNO2/GSTP1/HLA-B/HLA-E/IL1RN/IL6/IL10RA/IL12RB2/KCNJ8/LGALS9/PLA2G2A/TLR9/TREM1/MAPK3/SLAMF8/PTGFR/DEFB134/NOD2/BPI/TLR5/TNFAIP3/TNFRSF1A/FZD5/ZC3H12A/TNFRSF11A/LY86                                                                                                                                                                                                                                                                                                                                                                                                                                                                                                                                                                                                                                             | 38  |
| GO:0072044 | collecting duct development                                      | 4/901   | 13/17046   | 0.00378 | 0.04213 | 0.03313 | AKR1B1/AQP2/BMP4/PAX8                                                                                                                                                                                                                                                                                                                                                                                                                                                                                                                                                                                                                                                                                                                                                                                                                                                              | 4   |
| GO:0072189 | ureter development                                               | 4/901   | 13/17046   | 0.00378 | 0.04213 | 0.03313 | SOX8/BMP4/SOX9/ALDH1A2                                                                                                                                                                                                                                                                                                                                                                                                                                                                                                                                                                                                                                                                                                                                                                                                                                                             | 4   |
| GO:2000479 | regulation of cAMP-dependent protein kinase activity             | 4/901   | 13/17046   | 0.00378 | 0.04213 | 0.03313 | NPFFR2/PRKAR1B/ADIPOQ/RAPGEF2                                                                                                                                                                                                                                                                                                                                                                                                                                                                                                                                                                                                                                                                                                                                                                                                                                                      | 4   |

|            |                                                                           |        |           |         |         |         |                                                                                                                                                                                                                           |    |
|------------|---------------------------------------------------------------------------|--------|-----------|---------|---------|---------|---------------------------------------------------------------------------------------------------------------------------------------------------------------------------------------------------------------------------|----|
| GO:0072503 | cellular divalent inorganic cation homeostasis                            | 31/901 | 352/17046 | 0.0038  | 0.04231 | 0.03327 | TRDN/CCR1/ADM/DRD4/ESR1/NPTN/GPER1/ANXA6/LCK/ATP1A2/OPRL1/PDE6B/PIK3CG/PKHD1/PML/SLC30A10/CHRNA9/PRKD1/TRPC7/CCL11/BMP4/SLC8A1/TGM2/TRPC4/TRP C6/CCR2/CXCR4/CALR/ATP13A4/CASQ1/SMGT1                                      | 31 |
| GO:0032649 | regulation of interferon-gamma production                                 | 11/901 | 82/17046  | 0.00381 | 0.0424  | 0.03334 | HLA-DPA1/IL12RB2/INHBA/ISL1/LGALS9/IL20RB/TLR9/NOD2/CCR2/FZD5/FADD                                                                                                                                                        | 11 |
| GO:0045766 | positive regulation of angiogenesis                                       | 13/901 | 106/17046 | 0.00386 | 0.0428  | 0.03366 | CHI3L1/ADM/EPHA1/FOXC2/ISL1/KDR/ANGPT4/PRKD1/CCL11/SFRP2/TWIST1/RUNX1/SPHK1                                                                                                                                               | 13 |
| GO:1903522 | regulation of blood circulation                                           | 22/901 | 224/17046 | 0.00387 | 0.0428  | 0.03366 | KCNMB2/TRDN/CELF2/ADM/CPS1/CTGF/ECE1/FGA/NEDD4L/BMP10/GPER1/KCNIP2/HRH1/JUP/KCNH2/MYL2/ATP1A2/NPPC/PIK3CG/SLC8A1/CACNA1E/HOPX                                                                                             | 22 |
| GO:0032635 | interleukin-6 production                                                  | 12/901 | 94/17046  | 0.00389 | 0.04294 | 0.03377 | SPON2/HLA-B/IL6/ISL1/LGALS9/TLR9/NOD2/BPI/TNFAIP3/TWIST1/NLRX1/ZC3H12A                                                                                                                                                    | 12 |
| GO:0048863 | stem cell differentiation                                                 | 23/901 | 238/17046 | 0.00389 | 0.04294 | 0.03377 | A2M/EPHA3/FGF10/FOXC2/SOX8/NRG1/ISL1/HES5/SMAD3/MEOX1/LEF1/PITX2/S100A4/SFRP2/BMP4/SOX9/TEAD3/TWIST1/PAX8/LOXL3/TP63/ALDH1A2/FGF19                                                                                        | 23 |
| GO:0051090 | regulation of sequence-specific DNA binding transcription factor activity | 30/901 | 338/17046 | 0.0039  | 0.04295 | 0.03377 | CYLD/ESR1/ID3/IL6/JUP/LGALS9/NHLH2/PKHD1/RIPK4/TLR9/CYTL1/PRKD1/MAPK3/CREBZF/TRIM27/NOD2/SGK1/STK3/TNFAIP3/TRAF1/TRAF5/TWIST1/TNFRSF4/WNT10B/CARD1 4/ZC3H12A/NR0B2/TNFRSF11A/SPHK1/PIAS2                                  | 30 |
| GO:0006875 | cellular metal ion homeostasis                                            | 37/901 | 442/17046 | 0.00392 | 0.04301 | 0.03382 | TCIRG1/TRDN/CCR1/ADM/DRD4/ESR1/NEDD4L/NPTN/GPER1/FLVCR1/ANXA6/LCK/NUBP1/ATP1A2/OPRL1/PDE6B/PIK3CG/PKHD1/PML/SLC30A10/CHRNA9/PRKD1/TRPC7/CCL11/ SGK1/BMP4/SLC8A1/TGM2/TRPC4/TRPC6/CCR2/CXCR4/CALR/ATP13A4/CASQ1/SMGT1/MTL5 | 37 |
| GO:0002704 | negative regulation of leukocyte mediated immunity                        | 7/901  | 39/17046  | 0.00393 | 0.04301 | 0.03382 | HLA-B/HLA-E/LGALS9/IL20RB/NOD2/BST2/CCR2                                                                                                                                                                                  | 7  |
| GO:0034121 | regulation of toll-like receptor signaling pathway                        | 7/901  | 39/17046  | 0.00393 | 0.04301 | 0.03382 | NLRP6/IRF1/TLR9/NOD2/TLR5/TNFAIP3/RSAD2                                                                                                                                                                                   | 7  |
| GO:0045216 | cell-cell junction organization                                           | 21/901 | 211/17046 | 0.00403 | 0.04403 | 0.03463 | CDH3/CDH9/CDH12/CDH13/PKP3/MPP7/EPHA3/NFASC/EPB41L3/GJB2/FMN1/JUP/KDR/SMAD3/MPZ/LIMS2/PXN/FZD5/PARD6G/PARD6B/ACTN1                                                                                                        | 21 |
| GO:0030324 | lung development                                                          | 19/901 | 184/17046 | 0.00406 | 0.04432 | 0.03486 | PDPN/CHI3L1/CTGF/FGF10/HSD11B1/RSP02/IGF1/KDR/INSC/LOX/C11orf73/PITX2/MAPK3/MAP2K2/STRA6/BMP4/SOX9/HOPX/ALDH1A2                                                                                                           | 19 |
| GO:0035767 | endothelial cell chemotaxis                                               | 5/901  | 21/17046  | 0.00409 | 0.04434 | 0.03487 | EGR3/NR4A1/NOV/PRKD1/PLEKHG5                                                                                                                                                                                              | 5  |
| GO:1901020 | negative regulation of calcium ion transmembrane transporter activity     | 5/901  | 21/17046  | 0.00409 | 0.04434 | 0.03487 | TRDN/DRD4/ATP1A2/OPRL1/TLR9                                                                                                                                                                                               | 5  |
| GO:1903170 | negative regulation of calcium ion transmembrane transport                | 5/901  | 21/17046  | 0.00409 | 0.04434 | 0.03487 | TRDN/DRD4/ATP1A2/OPRL1/TLR9                                                                                                                                                                                               | 5  |



|            |                                                             |        |            |         |         |         |                                                                                                                                                                                                                                                                                                                                                                                                                                                                                                                                                                              |    |
|------------|-------------------------------------------------------------|--------|------------|---------|---------|---------|------------------------------------------------------------------------------------------------------------------------------------------------------------------------------------------------------------------------------------------------------------------------------------------------------------------------------------------------------------------------------------------------------------------------------------------------------------------------------------------------------------------------------------------------------------------------------|----|
| GO:0035270 | endocrine system development                                | 15/901 | 132/17046  | 0.00418 | 0.04527 | 0.0356  | CDKN1C/FGF10/FOXO1/DKK3/HOXB3/HOXD3/IL6/ISL1/SMAD3/PITX2/STRA6/BMP4/SOX9/PAX8/ALDH1A2                                                                                                                                                                                                                                                                                                                                                                                                                                                                                        | 15 |
| GO:0050680 | negative regulation of epithelial cell proliferation        | 13/901 | 107/17046  | 0.00419 | 0.04529 | 0.03562 | CDKN1C/LECT1/VASH1/MCC/PLA2G2A/LIMS2/IFT122/SLURP1/SFRP2/BMP4/SOX9/WNT10B/RUNX3                                                                                                                                                                                                                                                                                                                                                                                                                                                                                              | 13 |
| GO:0009306 | protein secretion                                           | 38/901 | 459/17046  | 0.0042  | 0.04529 | 0.03562 | CHI3L1/CIDEA/ABAT/DRD4/FGA/EXPH5/GNAS/GPER1/FFAR2/HLA-E/IGF1/IL1RN/IL6/ISL1/LGALS9/LLGL1/NOV/PARK2/PDE4C/PML/TLR9/TREM1/GOLPH3L/SYBU/PRKAR1B/TRIM27/NOD2/VAMP2/TWIST1/TNFRSF4/CACNA1E/RAB11FIP1/NROB2/MON1A/IRS2/SYT7/RSAD2/RAB3D                                                                                                                                                                                                                                                                                                                                            | 38 |
| GO:1903531 | negative regulation of secretion by cell                    | 17/901 | 158/17046  | 0.00421 | 0.04529 | 0.03562 | CHGA/CIDEA/DRD4/IL1RN/IL6/INHBA/LGALS9/NOV/PARK2/PDE4C/PML/TRIM27/CCR2/TNFRSF4/RAB11FIP1/RSAD2/ADIPOQ                                                                                                                                                                                                                                                                                                                                                                                                                                                                        | 17 |
| GO:0005975 | carbohydrate metabolic process                              | 62/901 | 835/17046  | 0.00421 | 0.04529 | 0.03562 | GNE/CHI3L1/CHI3L2/B4GALT7/GALNT15/CLN5/SLC51B/NEU4/GALM/CPS1/PARP4/B3GLCT/MGAT5B/ADR3/DDOST/ENO2/TRAK1/FOXO1/AKR1B1/NUP210/MTOR/FUCA1/SLC37A4/ST6GALNAC3/GBGT1/GAPDH/SLC17A5/DHDH/GPER1/EOGT/GRB10/HAS1/HK1/HRH1/IGF1/IGF2/IL6/MUC21/LHCGR/ME1/MGAT1/NEU1/OAS2/PARK2/CHST15/SIRT6/GALNT7/PGAM2/PKM/PRKAG3/POMC/PPP1CB/PPP1CC/CSGALNACT1/PHLDA2/MOGS/CALR/RAE1/IRS2/STBD1/ADIPOQ/NUP93                                                                                                                                                                                        | 62 |
| GO:0045893 | positive regulation of transcription, DNA-templated         | 94/901 | 1362/17046 | 0.00431 | 0.04618 | 0.03631 | CDH13/CDKN1C/DMRT2/TBR1/ERLIN2/PSIP1/IL31RA/CITED4/BHLHA15/EGFR/ESR1/FGF10/SBNO2/FOXC2/FOXO1/VGLL2/MTOR/DNAJC2/BMP10/GPER1/BRF1/SOX8/HMGA1/NR4A1/TFAP2E/BARHL2/IGF1/IGF2/CYR61/IL6/FOXK2/INHBA/IRF1/ISL1/JUP/HES5/LGALS9/LMNA/LMO2/SMAD3/MEF2D/MEOX1/MEOX2/MITF/NFATC3/NFYB/NHLH2/NTF3/PARK2/LEF1/PITX2/PLAGL1/RIPK4/TLR9/CYTL1/POMC/BANP/PRKD1/MAPK3/ARNTL2/RGMA/TRIM27/NPAS3/NOD2/SFRP2/BMP4/ZNF649/BMPR1B/SOX9/STK3/SUPT6H/TBP/TCEA1/ZEB1/TEAD3/TNFRSF1A/TRAF1/TRAF5/TWIST1/WNT10B/PAX8/FZD5/CARD14/RUNX1/TP63/RUNX3/FADD/TNFRSF11A/SPHK1/PIAS2/LDB2/CBFA2T2/MICAL2/NR1H4 | 94 |
| GO:1903508 | positive regulation of nucleic acid-templated transcription | 94/901 | 1362/17046 | 0.00431 | 0.04618 | 0.03631 | CDH13/CDKN1C/DMRT2/TBR1/ERLIN2/PSIP1/IL31RA/CITED4/BHLHA15/EGFR/ESR1/FGF10/SBNO2/FOXC2/FOXO1/VGLL2/MTOR/DNAJC2/BMP10/GPER1/BRF1/SOX8/HMGA1/NR4A1/TFAP2E/BARHL2/IGF1/IGF2/CYR61/IL6/FOXK2/INHBA/IRF1/ISL1/JUP/HES5/LGALS9/LMNA/LMO2/SMAD3/MEF2D/MEOX1/MEOX2/MITF/NFATC3/NFYB/NHLH2/NTF3/PARK2/LEF1/PITX2/PLAGL1/RIPK4/TLR9/CYTL1/POMC/BANP/PRKD1/MAPK3/ARNTL2/RGMA/TRIM27/NPAS3/NOD2/SFRP2/BMP4/ZNF649/BMPR1B/SOX9/STK3/SUPT6H/TBP/TCEA1/ZEB1/TEAD3/TNFRSF1A/TRAF1/TRAF5/TWIST1/WNT10B/PAX8/FZD5/CARD14/RUNX1/TP63/RUNX3/FADD/TNFRSF11A/SPHK1/PIAS2/LDB2/CBFA2T2/MICAL2/NR1H4 | 94 |
| GO:0044282 | small molecule catabolic process                            | 29/901 | 326/17046  | 0.00436 | 0.04659 | 0.03664 | BCKDK/MTHFS/SLC27A2/HIBADH/ACOT7/CRABP1/ABAT/AGXT/ENO2/FAH/MTOR/PNKD/GAPDH/SLC2/DHDH/HK1/ACADL/ACAT1/LDLR/NUDT1/PCYOX1/PGAM2/PKM/PON1/SMAD3/TWIST1/KMO/IRS2/ADIPOQ                                                                                                                                                                                                                                                                                                                                                                                                           | 29 |
| GO:0060440 | trachea formation                                           | 3/901  | 7/17046    | 0.00439 | 0.04683 | 0.03682 | MAPK3/MAP2K2/BMP4                                                                                                                                                                                                                                                                                                                                                                                                                                                                                                                                                            | 3  |
| GO:0002252 | immune effector process                                     | 53/901 | 693/17046  | 0.00439 | 0.04683 | 0.03682 | ABI1/SPON2/CHGA/RNF168/DMBT1/A2M/UNC13D/FCGR2A/SBNO2/ACIN1/PUM2/SLC37A4/FFAR2/HLA-B/HLA-E/HLX/HSP90AA1/HSP90AB1/IL6/IRF1/KCNJ8/LCK/LCP1/LGALS9/OAS2/LEF1/PIK3CG/PML/IL20RB/TREM1/APBB1IP/MAPK3/MASP1/HTRA1/NOD2/STAT2/SUPT6H/BST2/VAMP2/TNFAIP3/CCR2/TNFRSF4/CA7/FZD5/NLRX1/UNC93B1/HIST1H3A/SLA2/IFITM1/FADD/RSAD2/CD8A/NUP93                                                                                                                                                                                                                                               | 53 |
| GO:0007422 | peripheral nervous system development                       | 10/901 | 72/17046   | 0.00442 | 0.04697 | 0.03694 | CYP11A1/EGR3/NFASC/SOX8/NRG1/ISL1/NTF3/RUNX1/RUNX3/ARHGAP10                                                                                                                                                                                                                                                                                                                                                                                                                                                                                                                  | 10 |
| GO:0043010 | camera-type eye development                                 | 26/901 | 283/17046  | 0.00442 | 0.04697 | 0.03694 | CDKN1C/DRD4/FGF10/FOXC2/SOX8/HPCA/AQP5/INHBA/HES5/SMAD3/MAP3K1/MITF/PDE6B/ATP8A2/PITX2/IFT122/STRA6/BMP4/BMPR1B/SOX9/ZEB1/TWIST1/FZD5/BFSP2/KDM2B/ALDH1A2                                                                                                                                                                                                                                                                                                                                                                                                                    | 26 |
| GO:0060541 | respiratory system development                              | 21/901 | 213/17046  | 0.00449 | 0.04763 | 0.03746 | SPEG/PDPN/CHI3L1/CTGF/FGF10/HSD11B1/RSP02/IGF1/KDR/INSC/LOX/LEF1/C11orf73/PITX2/MAPK3/MAP2K2/STRA6/BMP4/SOX9/HOPX/ALDH1A2                                                                                                                                                                                                                                                                                                                                                                                                                                                    | 21 |
| GO:0032637 | interleukin-8 production                                    | 9/901  | 61/17046   | 0.00452 | 0.04784 | 0.03762 | CHI3L1/FFAR2/LGALS9/TLR9/NOD2/BPI/TLR5/FADD/ADIPOQ                                                                                                                                                                                                                                                                                                                                                                                                                                                                                                                           | 9  |
| GO:0070663 | regulation of leukocyte proliferation                       | 19/901 | 186/17046  | 0.00457 | 0.04827 | 0.03796 | FGF10/GSTP1/HLA-DPA1/HLA-E/ZC3H12D/IGF1/IGF2/IL6/IRF1/LGALS9/IL20RB/BMP4/TNFAIP3/CCR2/TNFRSF4/ZAP70/LST1/IRS2/FADD                                                                                                                                                                                                                                                                                                                                                                                                                                                           | 19 |

|                                    |                                                               |           |           |         |          |         |                                                                                                                                                                                                                                                                                                                                                                         |       |
|------------------------------------|---------------------------------------------------------------|-----------|-----------|---------|----------|---------|-------------------------------------------------------------------------------------------------------------------------------------------------------------------------------------------------------------------------------------------------------------------------------------------------------------------------------------------------------------------------|-------|
| GO:0048010                         | vascular endothelial growth factor receptor signaling pathway | 26/901    | 284/17046 | 0.00463 | 0.04885  | 0.03841 | ABI1/LECT1/EGFR/FGF10/RASA3/FOXC2/MTOR/FGF22/GRB10/NRG1/HSP90AA1/JUP/KDR/NRAS/PRKD1/MAPK3/MAP2K2/PSMB4/PSMD7/PXN/RASGRF2/TMEM204/IRS2/SPHK1/RAPGEF2/FGF19                                                                                                                                                                                                               | 26    |
| GO:0002684                         | positive regulation of immune system process                  | 62/901    | 839/17046 | 0.00468 | 0.04905  | 0.03857 | ABI1/TANK/SPON2/CCR1/MAP3K8/CYLD/COCH/NLRP6/DMBT1/EGR3/A2M/UNC13D/FCGR2A/FGF10/ACIN1/FLOT2/PUM2/MTOR/GNAS/FFAR2/HLA-B/HLA-DPA1/HLA-E/HLX/HSP90AA1/HSP90AB1/IGF1/IGF2/IL6/INHBA/IRF1/ITGB2/LCK/LGALS9/MAP3K1/NFATC3/NRAS/LEF1/TLR9/PAG1/MAPK3/MASP1/PSMB4/PSMD7/NOD2/TLR5/TNFAIP3/CCR2/TNFRSF4/ZAP70/FZD5/NLRX1/CALR/UNC93B1/SLA2/SCIN/RUNX1/IRS2/FADD/SKAP2/RSAD2/CD79A | 62    |
| GO:0007219                         | Notch signaling pathway                                       | 20/901    | 200/17046 | 0.00468 | 0.04905  | 0.03857 | TSPAN5/RCAN2/MIB2/AGXT/FGF10/FOXC2/HOXD3/HESS5/LLGL1/MFNG/MOV10/NOV/ANGPT4/PGAM2/NOD2/SOX9/TLE3/NROB2/TP63/NR1H4                                                                                                                                                                                                                                                        | 20    |
| GO:0009895                         | negative regulation of catabolic process                      | 20/901    | 200/17046 | 0.00468 | 0.04905  | 0.03857 | CIDEA/EGFR/FHIT/MTOR/PABPC1/ANXA2/NRG1/HSP90AB1/KIF25/SMAD3/SIRT6/PIK3CG/PML/BANP/CCAR2/TERF1/TIMP3/SLIRP/DAPL1/N4BP1                                                                                                                                                                                                                                                   | 20    |
| GO:0032355                         | response to estradiol                                         | 14/901    | 121/17046 | 0.00472 | 0.04946  | 0.0389  | CTGF/DNMT3A/EGFR/ESR1/FGA/FGF10/GJB2/GPER1/HTR5A/OPRL1/PTGFR/BMP4/CALR/ALDH1A2                                                                                                                                                                                                                                                                                          | 14    |
| GO:0007249                         | I-kappaB kinase/NF-kappaB signaling                           | 23/901    | 242/17046 | 0.00477 | 0.04987  | 0.03922 | TANK/MIB2/CYLD/NLRP6/ESR1/GSTP1/LGALS9/NOV/PARK2/TLR9/ZDHHC13/PRKD1/PLEKHG5/S100A4/NOD2/BST2/TNFAIP3/TNFRSF1A/TRAF5/NLRX1/FADD/SPHK1/ADIPOQ                                                                                                                                                                                                                             | 23    |
| <b>All DMC, Cellular Component</b> |                                                               |           |           |         |          |         |                                                                                                                                                                                                                                                                                                                                                                         |       |
|                                    | Description                                                   | GeneRatio | BgRatio   | pvalue  | p.adjust | qvalue  | geneID                                                                                                                                                                                                                                                                                                                                                                  | Count |

|            |                        |         |             |          |          |          |                                                                                                                                                                                                                                                                                                                                                                                                                                                                                                                                                                                                                                                                                                                                                                                                                                                                                                                                                                                                                                                                                                                                                                                                                                                                                                                                                                                                                                                                                                                                                                                                                                                                                                                                                                                                                                                                                                                                                                                                                                                                                                                                                                                                                                                                                                                                                                                                                                                                                                                                                                                                                                                                                                                                                                                                                                                                                                                                                                                                                                                                                                                                                                                                                                                                                                                                                                                                                                                                                                                                                                                                                                                                                                                                                                                                                                                                                                                                                                                                                                                                                                                                                                                                                                                                         |     |
|------------|------------------------|---------|-------------|----------|----------|----------|-------------------------------------------------------------------------------------------------------------------------------------------------------------------------------------------------------------------------------------------------------------------------------------------------------------------------------------------------------------------------------------------------------------------------------------------------------------------------------------------------------------------------------------------------------------------------------------------------------------------------------------------------------------------------------------------------------------------------------------------------------------------------------------------------------------------------------------------------------------------------------------------------------------------------------------------------------------------------------------------------------------------------------------------------------------------------------------------------------------------------------------------------------------------------------------------------------------------------------------------------------------------------------------------------------------------------------------------------------------------------------------------------------------------------------------------------------------------------------------------------------------------------------------------------------------------------------------------------------------------------------------------------------------------------------------------------------------------------------------------------------------------------------------------------------------------------------------------------------------------------------------------------------------------------------------------------------------------------------------------------------------------------------------------------------------------------------------------------------------------------------------------------------------------------------------------------------------------------------------------------------------------------------------------------------------------------------------------------------------------------------------------------------------------------------------------------------------------------------------------------------------------------------------------------------------------------------------------------------------------------------------------------------------------------------------------------------------------------------------------------------------------------------------------------------------------------------------------------------------------------------------------------------------------------------------------------------------------------------------------------------------------------------------------------------------------------------------------------------------------------------------------------------------------------------------------------------------------------------------------------------------------------------------------------------------------------------------------------------------------------------------------------------------------------------------------------------------------------------------------------------------------------------------------------------------------------------------------------------------------------------------------------------------------------------------------------------------------------------------------------------------------------------------------------------------------------------------------------------------------------------------------------------------------------------------------------------------------------------------------------------------------------------------------------------------------------------------------------------------------------------------------------------------------------------------------------------------------------------------------------------------------------|-----|
| GO:0005575 | cellular_compone<br>nt | 942/942 | 16277/17046 | 3.63E-20 | 2.48E-17 | 2.20E-17 | AKT3/ABI1/CDH3/TANK/SMIM6/CD300LD/GNE/ZNF783/CCDC180/CDH9/TSPAN5/CDH12/CDH13/SUGP2/MBNL2/FARP1/KLRG1/RCAN2/KCNMB2/CDKN1C/SPEG/BCKDK/TCIRG1/MRV11/TRDN/ABCA9/SPON2/C1D/COG5/ZBTB18/PITRM1/TACC2/MTHFS/PDPN/DMRT2/CELFL/CELFL2/TBR1/SEPT9/GJB6/HCST/NPFFR2/ADCY3/PNRC1/TMED10/SLC27A2/LECT1/RER1/ESM1/ADAM29/HNRNPUL1/RPP14/HIBADH/CHGA/CHI3L1/ERLIN2/PSIP1/CHI3L2/PKP3/EGLN2/PXMP4/ATXN2L/B4GALT7/PTH2/KIF12/ACOT7/EXOC3/CHRNA1/CHRNA2/CHRNA5/GPRIN1/SORCS1/CIDEA/C1QTNF7/GBP4/ALPK2/PANX3/RBP7/GALNT15/AP351/CLCA1/C10orf90/FAT3/CLN5/MRPL52/FRMD6/CCR1/SLC51B/C15orf27/SPATA33/ZG16B/SLC38A10/SEZ6/KRT40/TNFAIP8L1/MOB3A/CNP/APOA1BP/NEU4/COL9A3/COL11A1/LYPD6B/GALM/COMP/SCLT1/MAP3K8/ZFP42/ADM/IL31RA/EGFLAM/UBLCP1/HUS1B/C7orf34/O R2A14/CPD/CPM/CP51/NDUF6F6/PXDNL/CRABP1/ZNF358/TRPM6/MIB2/PARP4/MPP7/LDLRAD3/FAM101A/B3GLCT/CEP128/LYSMD4/MGAT5B/APCDD1/CSTA/KLC3/ZNF738/CTGF/ABCC13/XKR3/SMYD1/SGOL1/PPM1L/LRRC34/SH3D19/CYB561/CYLD/MBOAT1/ADRB3/ANKRD46/ESCO2/CYP11A1/ZNF782/FITM1/ADAL/TRPV3/ZNF709/ZNF781/CALML6/CITE D4/DBD1/WBP2NL/DDOST/RNF168/ZNF366/BHLHA15/COCH/PPP1R18/NLRP6/DIO3/DLG2/DRD4/DSG3/DTNA/ECE1/EEF2/FNA2/EGFR/EGR3/PATL2/EIF4G1/A2M/ELK4/ANKRD23/TMEM17/LIPH/EML1/UNC13D/DNAH12/SLC10A4/SMIM14/ENO2/ADCK5/EPHA1/EPHA3/EPHB4/ESR1/ALAS1/F11/FAH/FA T2/SPATA13/PRSS54/FCGR2A/RNF182/PHACTR1/SP8/FGA/FGF10/FHIT/XRN2/RASA3/PPM1E/VASH1/BTBD3/SBNO2/TRAK1/MSRB2/ACIN1/FOXL1/FOXC2/TBC1D9B/FOXO1/EXPH5 /AKR1B1/SPG20/NFASC/EPB41L3/GGA3/FLNB/DIP2A/FLOT2/MCL1/TBC1D1/RHOB2B/NUP210/SEL1L3/ATP11A/NEDD4L/SYNE1/PSD3/LARP1/PPP1R13B/PUM2/ARHGEF18/RYBP/ MORC3/MAPK8IP2/TSSK2/VGLL2/MTOR/FUCA1/WDR27/SLC37A4/GABBR1/RASGEF1C/RNF144B/ZNF549/CCDC110/STG6ALNAC3/TMEM151A/NUTM1/DSCR9/GAG/SAMM50/DFN B31/ALS2CL/PNKD/SEC31B/TENM4/ACOT11/FAM169A/RAI14/RGS22/STEAP2/GAS2/FBXL21/FBXO2/LCE2B/SACS/GATM/GBGT1/GAPDHS/PLEK2/SLC17A5/ADGRF1/RPS6KC1/PABP C1/AKAP8L/GJA3/DNAJC2/FGF22/NPTN/GJB2/CLUL1/AMPD2/SDCBP2/PDE7B/DKK3/CYTH4/GLS2/VPS4A/AMPD3/GPR162/DHDH/BMP10/ZNF638/GNAS/ZNF311/CRACR2B/TMPR SS12/PIGW/IZUMO1/ZNF844/THEM5/GPR26/GPER1/EOGT/DOK7/DCBLD1/FFAR2/TRIM42/GRB10/MRPS18B/FLVCR1/GRIK4/ZBTB44/DNAJC15/SCG3/GSTP1/GTF2B/BRF1/TMOD4 /GUCY1A3/CCDC106/NME7/GPR132/PADI1/GZMA/ANXA2/HAS1/SERPIND1/SOX8/KCNIP2/NRG1/ANXA6/HK1/HLA-B/HLA-DOA/HLA-DPA1/ANXA13/HLA-E/HLA- F/HLX/HMGA1/NR4A1/ACACB/HPCA/APBA2/HOXB3/HOXC4/HOXC5/HOXC6/HOXC7/HOXC8/HOXC9/AGFG2/HRH1/HSD11B1/HSD17B2/ACADL/HSPA1L/HSP90AA1/HSP90AB1/HTR3A/HTR5A/DUP D1/ADAMTSL5/ANKRD45/TFAP2E/ID3/ZC3H12D/COL28A1/RSPD2/MS4A10/FMN1/CD300E/BARHL2/NME9/IGF1/IGF2/CYR61/GPR142/LCE1C/LCE1D/LCE2D/IL1R1/IL1RN/IL6/IL10 RA/AQP2/IL11RA/IL12RB2/IL15RA/PRSS41/IL16/FOXK2/AQP5/INHBA/INPP5A/IRF1/AQP9/ISL1/ITGA7/ITGB2/ITGB7/ITIH3/ITIH4/IVL/JUP/CD82/USP50/HILS1/ATP9B/KCP/KCNH2/K CNJ8/KCNJ9/KCNMB1/KDR/ACAT1/KIF25/PO5/KRT7/KRT15/AMIGO3/INSC/TOMM20L/CLEC17A/HES5/SLC6A17/RESP18/CDHR4/AFF3/LAIR2/LAMA3/STMN1/OR2A5/LCK/LCP1/M UC21/LDLR/ARHGDI1/LGALS9/LHCGR/LLGL1/C11orf87/LMNA/LMO2/RAB19/LOX/LPP/LTB/LTBP1/SMAD3/MC2R/MCC/ME1/ME2/MEF2D/MAP3K1/MEOX1/MEOX2/MF12/MFNG/ MGAT1/SCGB2A1/MITF/LHX8/ASGR1/MOCS1/MOV10/MP2/IGFL4/MT1A/NUDT1/MYH4/MYL2/NUBP1/NDUF84/DRG1/NEDD9/NEU1/ATP1A2/NFATC3/NFYB/NHLH2/NMBR/NOV/ NPPC/NRAS/NTF3/OAS2/WRAP73/OPRL1/OR2C1/OR3A2/SLC22A18/P2RY6/PFAH2/ATP5B/IL21R/DEF6/ANO7/PALM/ARHGEF3/PARK2/SPOCK3/BOLA1/UTP11L/LEF1/DDX47/CEN D1/CHST15/ANGPT4/PDE4C/PCYOX1/PDE7A/C11orf73/SIRT6/PDE6B/HIGD1B/ATP8A2/GALNT1/PGAM2/PI3/PIGC/PIK3CG/PITX2/PKH1/PKM/SLC6A17/RESP18/CDHR4/AFF3/LAIR2/LAMA3/STMN1/OR2A5/LCK/LCP1/M EC/PRKAG3/PML/RIPPLY3/FXYD6/GPR84/IL20RB/SLCO1C1/PNLIP/RIPK4/TLR9/TREM1/CYTL1/POMC/SSH1/PON1/RIN2/MOV10L1/POU2AF1/ZDHHC13/APBB1P/ROBO4/MXRA8/F BLIM1/BNC2/MED18/PALMD/CYP2W1/RPP25/LPCAT2/BANP/PPP1CB/FAM118A/HERC6/PPP1CC/PIWIL2/ELP3/ARHGEF10L/PRMT6/DNAJC17/GOLPH3L/ZNF532/PPP2R2B/FANCI/ MOB1A/SLC47A1/SLC29A3/MIS18BP1/WDR33/TRPV6/SMPD3/SLC30A10/CNOT11/CHRNA9/SYBU/PEX26/LIMS2/FRMD4A/VAC14/CARKD/PARVA/PRKAR1B/TTC17/IFT122/CFAP44 /ERMARD/MCTP2/LMBRD1/CSGALNACT1/PAG1/CISD1/PRKD1/WBS2/MYNN/BIN3/APOBR/MAPK3/MAP2K2/PCDHGC4/PCDHGB7/PCDHGB3/PCDHGA11/PRKRIR/PROC/MRAP/TRP V5/PRMT8/MASP1/HTRA1/SLAMF8/CDC42SE1/PSMB4/PAK6/ARNTL2/RGMA/CEACAM19/PRDM11/TRPC7/LPAR5/PSMD7/SLURP1/ACTR3B/PTGFR/PLEKHG5/TENM2/GATAD2B/ER | 942 |
| GO:0005886 | plasma<br>membrane     | 336/942 | 4464/17046  | 2.51E-11 | 5.73E-09 | 5.07E-09 | AKT3/ABI1/CDH3/CD300LD/CDH9/TSPAN5/CDH12/CDH13/FARP1/KLRG1/KCNMB2/TCIRG1/TRDN/PDPN/GJB6/HCST/NPFFR2/ADCY3/TMED10/ADAM29/ERLIN2/PKP3/CHRNA1/CHRNA2/CHRNA5/GPRIN1/PANX3/CLCA1/FAT3/FRMD6/CCR1/SLC51B/C15orf27/SEZ6/CNP/LYPD6B/IL31RA/OR2A14/CPM/TRPM6/MPP7/LDLRAD3/APCDD1/CSTA/CTGF/XKR3/SH3 D19/CYLD/ADRB3/TRPV3/NLRP6/DIO3/DLG2/DRD4/DSG3/DTNA/ECE1/EEF2/EFNA2/EGFR/TMEM17/LIPH/SLC10A4/ENO2/EPHA1/EPHA3/EPHB4/ESR1/F11/FAT2/SPATA13/FCGR2 A/FGA/FGF10/RASA3/ACIN1/SPG20/NFASC/EPB41L3/FLNB/FLOT2/MCL1/RHOB2B/ATP11A/NEDD4L/SYNE1/PSD3/PPP1R13B/GABBR1/TENM4/RGS22/STEAP2/LCE2B/PLEK2/SLC1 7A5/ADGRF1/GJA3/NPTN/GJB2/SDCBP2/CYTH4/VPS4A/GPR162/GNAS/IZUMO1/GPR26/GPER1/DOK7/FFAR2/GRB10/FLVCR1/GRIK4/GSTP1/GUCY1A3/GPR132/GZMA/ANXA2/HAS 1/KCNIP2/NRG1/HLA-B/HLA-DOA/HLA-DPA1/ANXA13/HLA-E/HLA- F/HPCA/APBA2/HRH1/HSP90AA1/HSP90AB1/HTR3A/HTR5A/FMN1/CD300E/IGF1/IGF2/GPR142/LCE1C/LCE1D/LCE2D/IL1R1/IL1RN/IL6/IL10RA/AQP2/IL11RA/IL12RB2/PRSS41/IL16 /AQP5/INPP5A/AQP9/ITGA7/ITGB2/ITGB7/ITIH4/IVL/JUP/CD82/ATP9B/KCNH2/KCNJ8/KCNJ9/KCNMB1/KDR/SLC6A17/CDHR4/OR2A5/LCK/LCP1/MUC21/LDLR/LHCGR/LLGL1/RAB1 9/LPP/LTB/SMAD3/MC2R/MCC/MF12/ASGR1/MP2/NUBP1/NEU1/ATP1A2/NMBR/NRAS/OPRL1/OR2C1/OR3A2/SLC22A18/P2RY6/ATP5B/DEF6/ANO7/PALM/PCYOX1/PDE6B/ATP8 A2/PIK3CG/PKH1/PKM/SPA17/PLEC/FXYD6/GPR84/IL20RB/SLCO1C1/TLR9/TREM1/SSH1/APBB1P/BNC2/CYP2W1/FANCI/SLC47A1/TRPV6/SMPD3/SLC30A10/CHRNA9/LIMS2/PA RVA/PRKAR1B/TTC17/LMBRD1/PAG1/PRKD1/APOBR/MAPK3/MAP2K2/PCDHGC4/PCDHGB7/PCDHGB3/PCDHGA11/MRAP/TRPV5/PRMT8/CDC42SE1/RGMA/TRPC7/LPAR5/PTGFR/ PLEKHG5/TENM2/PTPRCAP/PTPRE/PXN/RASGRF2/TRIM27/RGR/RGS12/RIT2/EXOC4/S100A6/PARVG/NOD2/STRA6/CXCR5/DNAI2/SGK1/CLDN25/CERK/PCDH20/SLC4A1/SLC6A12/ SLC8A1/SLC9A3/SLC20A2/BMPR1B/LYNX1/BPI/STAT2/STK10/BST2/VAMP2/TGM2/TLR5/TNFRSF1A/TRAFF5/TRPC4/TRPC6/TRPM2/CCR2/TNFRSF4/ZAP70/CACNA1E/PTP4A1/CACNB 2/CXCR4/FZD5/CARD14/TMEM204/IGFLR1/CALD1/PSCA/GPR157/ZC3H12A/C6orf25/CALR/CAPS/ANTXR1/SLA2/BFSP2/ATP13A4/YIPF4/CASQ1/PARD6G/PARD6B/SLC43A1/IFITM1 /ITPRIP/IRS2/ACTN1/FADD/TNFRSF11A/SPHK1/ENDOU/SKAP2/STBD1/TSPAN18/CCRL2/MAP7/PRC1/SYT7/ESAM/SLC16A3/CD8A/TRIP10/LY86/RAB3D/ENTPD3/RAPGEF2/USP6NL/ CD79A                                                                                                                                                                                                                                                                                                                                                                                                                                                                                                                                                                                                                                                                                                                                                                                                                                                                                                                                                                                                                                                                                                                                                                                                                                                                                                                                                                                                                                                                                                                                                                                                                                                                                                                                                                                                                                                                                                                                                                                                                                                                                                               | 336 |

|            |                |         |             |          |          |          |                                                                                                                                                                                                                                                                                                                                                                                                                                                                                                                                                                                                                                                                                                                                                                                                                                                                                                                                                                                                                                                                                                                                                                                                                                                                                                                                                                                                                                                                                                                                                                                                                                                                                                                                                                                                                                                                                                                                                                                                                                                                                                                                                                                                                                                                                                                                                                                                                                                                                                                                                                                                                                                                                                                                                                                                                                                                                                                                                                                                                                                                                                                                                                                                                                                                                                                                                                                                                                                                                                                                                                                                                                                                                                                                                                                                                                                                                                                                                                                                                                                                                                                                                                                                |     |
|------------|----------------|---------|-------------|----------|----------|----------|------------------------------------------------------------------------------------------------------------------------------------------------------------------------------------------------------------------------------------------------------------------------------------------------------------------------------------------------------------------------------------------------------------------------------------------------------------------------------------------------------------------------------------------------------------------------------------------------------------------------------------------------------------------------------------------------------------------------------------------------------------------------------------------------------------------------------------------------------------------------------------------------------------------------------------------------------------------------------------------------------------------------------------------------------------------------------------------------------------------------------------------------------------------------------------------------------------------------------------------------------------------------------------------------------------------------------------------------------------------------------------------------------------------------------------------------------------------------------------------------------------------------------------------------------------------------------------------------------------------------------------------------------------------------------------------------------------------------------------------------------------------------------------------------------------------------------------------------------------------------------------------------------------------------------------------------------------------------------------------------------------------------------------------------------------------------------------------------------------------------------------------------------------------------------------------------------------------------------------------------------------------------------------------------------------------------------------------------------------------------------------------------------------------------------------------------------------------------------------------------------------------------------------------------------------------------------------------------------------------------------------------------------------------------------------------------------------------------------------------------------------------------------------------------------------------------------------------------------------------------------------------------------------------------------------------------------------------------------------------------------------------------------------------------------------------------------------------------------------------------------------------------------------------------------------------------------------------------------------------------------------------------------------------------------------------------------------------------------------------------------------------------------------------------------------------------------------------------------------------------------------------------------------------------------------------------------------------------------------------------------------------------------------------------------------------------------------------------------------------------------------------------------------------------------------------------------------------------------------------------------------------------------------------------------------------------------------------------------------------------------------------------------------------------------------------------------------------------------------------------------------------------------------------------------------------------|-----|
| GO:0071944 | cell periphery | 342/942 | 4563/17046  | 2.52E-11 | 5.73E-09 | 5.07E-09 | AKT3/ABI1/CDH3/CD300LD/CDH9/TSPAN5/CDH12/CDH13/FARP1/KLRG1/KCNMB2/TCIRG1/TRDN/PDPN/GJB6/HCST/NPFFR2/ADCY3/TMED10/ADAM29/ERLIN2/PKP3/EXOC3/CHRNA1/CHRNA2/CHRNA5/GPRIN1/PANX3/CLCA1/FAT3/FRMD6/CCR1/SLC51B/C15orf27/SEZ6/CNP/LYPD6B/IL31RA/OR2A14/CPM/TRPM6/MPP7/LDLRAD3/APCDD1/CSTA/CTGF/XKR3/SH3D19/CYLD/ADRB3/TRPV3/NLRP6/DIO3/DLG2/DRD4/DSG3/DTNA/ECE1/EEF2/EFNA2/EGFR/TMEM17/LIPH/SLC10A4/ENO2/EPHA1/EPHA3/EPHB4/ESR1/F11/FAT2/SPATA13/FCGR2A/FGA/FGF10/RASA3/ACIN1/SPG20/NFASC/EPB41L3/FLNB/FLOT2/MCL1/RHOBTB2/ATP11A/NEMD4/SYNE1/PSD3/PPP1R13B/GABBR1/TENM4/RAI14/RGS22/STEAP2/LCE2B/PLEK2/SLC17A5/ADGRF1/GJA3/NPTN/GJB2/SDCBP2/CYTH4/VPS4A/GPR162/GNAS/IZUMO1/GPR26/GPER1/DOK7/FFAR2/GRB10/FLVCR1/GRIK4/GSTP1/GUCY1A3/GPR132/GZMA/ANXA2/HAS1/KCNIP2/NRG1/HLA-B/HLA-DOA/HLA-DPA1/ANXA13/HLA-E/HLA-F/HPCA/APBA2/HRH1/HSP90AA1/HSP90AB1/HTR3A/HTR5A/FMN1/CD300E/IGF1/IGF2/GPR142/LCE1C/LCE1D/LCE2D/IL1R1/IL1RN/IL6/IL10RA/AQP2/IL11RA/IL12RB2/PRSS41/IL16/AQP5/INPP5A/AQP9/ITGA7/ITGB2/ITGB7/ITIH4/IVL/JUP/CD82/ATP9B/KCNH2/KCNJ8/KCNJ9/KCNMB1/KDR/SLC6A17/CDHR4/OR2A5/LCK/LCP1/MUC21/LDLR/LHCGR/LLGL1/RAB19/LPP/LTB/SMAD3/MC2R/MCC/MFI2/ASGR1/MP2/NUBP1/NEDD9/NEU1/ATP1A2/NMBR/NRAS/OPRL1/OR2C1/OR3A2/SLC22A18/P2RY6/ATP5B/DEF6/ANO7/PALM/PCYOX1/PDE6B/ATP8A2/PIK3CG/PKHD1/PKM/SPA17/PLEC/FXYD6/GPR84/IL20RB/SLCO1C1/TLR9/TREM1/SSH1/APBB1P/FBLIM1/BNC2/CYP2W1/FANCI/SLC47A1/TRPV6/SMPD3/SLC30A10/CHRNA9/LIMS2/PARVA/PRKAR1B/TTC17/LMBRD1/PAG1/PRKD1/APOBR/MAPK3/MAP2K2/PCDHGC4/PCDHGB7/PCDHGB3/PCDHGA11/MRAP/TRPV5/PRMT8/CDC42SE1/RGMA/TRPC7/LPAR5/PTGFR/PLEKHG5/TENM2/ERMN/PTPRCAP/PTPRE/PXN/RASGRF2/TRIM27/RGR/RGS12/RIT2/EXO4/S100A6/PARVG/NOD2/STRA6/CXCR5/DNAI2/SGK1/CLDN25/CERK/PCD H20/SLC4A1/SLC6A12/SLC8A1/SLC9A3/SLC20A2/BMPR1B/LYNX1/BPI/STAT2/STK10/BST2/VAMP2/TGM2/TLR5/TNFRSF1A/TRA5/TRPC4/TRPC6/TRPM2/CCR2/TNFRSF4/ZAP70/CACNA1E/PTP4A1/CACNB2/CXCR4/FZD5/CARD14/TMEM204/IGF1R1/CALD1/PSCA/GPR157/ZC3H12A/C6orf25/CALR/CAPS/ANTXR1/SLA2/BFSP2/ATP13A4/YIPF4/CASQ1/PARD6G/PARD6B/SLC43A1/FITM1/ITPRIP/SCIN/IRS2/ACTN1/FADD/TNFRSF11A/SPHK1/ENDOU/SKAP2/STBD1/TSPAN18/CCR2/MAP7/PRC1/SYT7/ESAM/SLC16A3/CD8A/TRIP10/LY86/RAB3D/ENTPD3/RAPGEF2/USP6NL/CD79A                                                                                                                                                                                                                                                                                                                                                                                                                                                                                                                                                                                                                                                                                                                                                                                                                                                                                                                                                                                                                                                                                                                                                                                                                                                                                                                                                                                                                                                                                                                                                                                                                                                                                                                                                                                                                                                                                                                                                                                                                    | 342 |
| GO:0005623 | cell           | 859/942 | 14587/17046 | 5.95E-08 | 1.02E-05 | 9.01E-06 | AKT3/ABI1/CDH3/TANK/CD300LD/GNE/ZNF783/CDH9/TSPAN5/CDH12/CDH13/SUGP2/MBNL2/FARP1/KLRG1/RCAN2/KCNMB2/CDKN1C/SPEG/BCKDK/TCIRG1/MRVI1/TRDN/ABCA9/C1D/COG5/ZBTB18/PITRM1/TACC2/MTHFS/PDPN/DMRT2/CELF1/CELF2/TBR1/SEPT9/GJB6/HCST/NPFFR2/ADCY3/PNRC1/TMED10/SLC27A2/LECT1/RER1/ADAM29/HNRPUL1/RPP14/HIBADH/CHGA/CHI3L1/ERLIN2/PSIP1/PKP3/EGLN2/PXMP4/ATXN2L/B4GALT7/KIF12/ACOT7/EXOC3/CHRNA1/CHRNA2/CHRNA5/GPRIN1/CIDEA/GBP4/ALPK2/PANX3/RBP7/GALNT15/AP3S1/CLCA1/C10orf90/FAT3/CLN5/MRPL52/FRMD6/CCR1/SLC51B/C15orf27/SPATA33/SLC38A10/SEZ6/KRT40/TNFAIP8L1/MOB3A/CNP/APOA1BP/NEU4/COL9A3/COL11A1/LYPD6B/GALM/SCLT1/MAP3K8/ZFP42/ADM/IL31RA/UBLCP1/HUS1B/OR2A14/CPM/CP51/NDUFA6/PXDNL/CRABP1/ZNF358/TRPM6/MIB2/PARP4/MPP7/LDLRAD3/FAM101A/B3GLCT/CEP128/MGAT5B/APCDD1/CSTA/KLC3/ZNF738/CTGF/XKR3/SMYD1/SGOL1/PPM1L/SH3D19/CYLD/MBOAT1/ADRB3/ESCO2/CYP11A1/ZNF782/FITM1/ADAL/TRPV3/ZNF709/ZNF781/CALML6/CITED4/DBB1/WBP2NL/DDOST/RNF168/ZNF366/BHLHA15/PPP1R18/NLRP6/DIO3/DLG2/DMBT1/DNAH6/DNAH8/DNM3TA/ABAT/DPH1/DRD4/DSG3/DTNA/ECE1/AGXT/EEF2/EFNA2/EGFR/EGR3/PATL2/EIF4G1/A2M/ELK4/ANKRD23/TMEM17/LIPH/EML1/UNC13D/DNAH12/SLC10A4/SMIM14/ENO2/ADCK5/EPHA1/EPHA3/EPHB4/ESR1/ALAS1/F11/FAH/FAT2/SPATA13/PRSS54/FCGR2A/RNF182/PHACTR1/SP8/FGA/FGF10/FHIT/XRN2/RASA3/PPM1E/VASH1/BTBD3/TRAK1/MSRB2/ACIN1/FOXL1/FOXO2/FOXO1/EXP5/AKR1B1/SPG20/NFASC/EPB41L3/GGA3/FLNB/DIP2A/FLOT2/MCL1/TBC1D1/RHOBTB2/NUP210/SEL1L3/ATP11A/NEDD4L/SYNE1/PSD3/LARP1/PPP1R13B/PUM2/ARHGFE18/RYPB/MORC3/MAPK8IP2/TSSK2/VGLL2/MTOR/FUCA1/WDR27/SLC37A4/GABBR1/RASGEF1C/RNF144B/ZNF549/CCDC110/ST6GALNAC3/NUTM1/GAK/SAMM50/DFNB31/ALS2CL/PNKD/SEC31B/TENM4/ACOT11/FAM169A/RAI14/RGS22/STEAP2/GAS2/FBXL21/FBXO2/LCE2B/SACS/GATM/GBGT1/GAPDH5/PLEK2/SLC17A5/ADGRF1/RPS6KC1/PABPC1/AKAP8L/GJA3/DNAJC2/FGF22/NPTN/GJB2/AMPD2/SDCBP2/PDE7B/CYTH4/GLS2/VPS4A/AMPD3/GPR162/DHDH/BMP10/ZNF638/GNAS/ZNF311/CRACR2B/PIGW/IZUMO1/ZNF844/THEM5/GPR26/GPER1/EOGT/DOK7/FFAR2/TRIM42/GRB10/MRPS18B/FLVCR1/GRIK4/ZBTB44/DNAJC15/SCG3/GSTP1/GTF2B/BRF1/TMOD4/GUCY1A3/CCDC106/NME7/GPR132/PADI1/GZMA/ANXA2/HAS1/SOX8/KCNIP2/NRG1/ANXA6/HK1/HLA-B/HLA-DOA/HLA-DPA1/ANXA13/HLA-E/HLA-F/HLX/HMGA1/NR4A1/ACACB/HPCA/APBA2/HOXB3/HOXC4/HOXC5/HOXC6/HOXD3/HRH1/HSD11B1/HSD17B2/ACADL/HSPA1L/HSP90AA1/HSP90AB1/HTR3A/HTR5A/DUPD1/TFA/P2E/ID3/ZC3H12D/COL28A1/RSPO2/FMN1/CD300E/BARHL2/NME9/IGF1/IGF2/GPR142/LCE1C/LCE1D/LCE2D/IL1R1/IL1RN/IL6/IL10RA/AQP2/IL11RA/IL12RB2/IL15RA/PRSS41/IL16/FOXK2/AQP5/INHBA/INPP5A/IRF1/AQP9/ISL1/ITGA7/ITGB2/ITGB7/ITIH4/IVL/JUP/CD82/USP50/HILS1/ATP9B/KCNH2/KCNJ8/KCNJ9/KCNMB1/KDR/ACAT1/KIF25/IPO5/KRT7/KRT15/INSC/TOMM20L/CLEC17A/HESS/SLC6A17/RESP18/CDHR4/AFF3/STMN1/OR2A5/LCK/LCP1/MUC21/LDLR/ARHGDI1/LGALS9/LHCGR/LLGL1/LMNA/LMO2/RAB19/LOX/LPP/LTB/S/MAD3/MC2R/MCC/ME1/ME2/MEF2D/MAP3K1/MEOX1/MEOX2/MFI2/MFNG/MGAT1/MITE/LHX8/ASGR1/MOCS1/MOV10/MPZ/MT1A/NUDT1/MYH4/MYL2/NUBP1/NDUFB4/DRG1/NEDD9/NEU1/ATP1A2/NFATC3/NFYB/NHLH2/NMBR/NOV/NPPC/NRAS/NTF3/OAS2/WRAP73/OPRL1/OR2C1/OR3A2/SLC22A18/P2RY6/PAFAH2/ATP5B/DEF6/ANO7/PALM/ARHGFE3/PARK2/BOLA1/UTP11L/LEF1/DDX47/CHST15/PDE4C/PCYOX1/PDE7A/C11orf73/SIRT6/PDE6B/ATP8A2/GALNT7/PGAM2/PIGC/PIK3CG/PITX2/PKHD1/PKM/PLA2G2A/PLAGL1/SPA17/PLEC/PRKAG3/PML/RIPPLY3/FXYD6/GPR84/IL20RB/SLCO1C1/RIPK4/TLR9/TREM1/POMC/SSH1/PON1/RIN2/MOV10L1/POU2AF1/ZDHHC13/APBB1P/MXRA8/FBLIM1/BNC2/MED18/PALMD/CYP2W1/RPP25/LPCAT2/BANP/PPP1CB/HERC6/PPP1CC/PIWIL2/ELP3/ARHGFE10L/PRMT6/DNAJC17/GOLPH3L/ZNF532/PPP2R2B/FANCI/MOB1A/SLC47A1/SLC29A3/MIS18BP1/WDR33/TRPV6/SMPD3/SLC30A10/CNOT11/CHRNA9/SYBU/PEX26/LIMS2/FRMD4A/VAC14/CARKD/PARVA/PRKAR1B/TTC17/IIFT122/CFAP44/ERMARD/MCTP2/LM BRD1/CSGALNACT1/PAG1/CISD1/PRKD1/WSB2/MYNN/BIN3/APOBR/MAPK3/MAP2K2/PCDHGC4/PCDHGB7/PCDHGB3/PCDHGA11/PRKRIR/PROC/MRAP/TRPV5/PRMT8/HTRA1/SLAMF8/CDC42SE1/PSMB4/PAK6/ARNTL2/RGMA/PRDM11/TRPC7/LPAR5/PSMD7/ACTR3B/PTGFR/PLEKHG5/TENM2/GATAD2B/ERMN/KLHL8/RDH14/METTL14/MARK4/CCAR2/PTPRE/PTPRE/PXN/CREBZF/FAM60A/ACTA2/RASGRF2/RFC2/TRIM27/RGR/RGS12/RIT2/EXO4/RPA3/RPL8/DEFB134/RPL29/S100A4/S100A5/S100A6/BGLAP/CCL11/ABHD4/MRPS14/NPAS3/C19orf33/PARVG/NOD2/STRA6/CXCR5/MAP1LC3B2/ARHGAP9/TRA2B/GZF1/DNAI2/SGK1/CLDN25/SYNDIG1L/MICAL1/CERK/PCDH20/TMEM237/VPS33A/BMP4/SLC4A1 | 859 |

|            |           |         |             |          |          |          |                                                                                                                                                                                                                                                                                                                                                                                                                                                                                                                                                                                                                                                                                                                                                                                                                                                                                                                                                                                                                                                                                                                                                                                                                                                                                                                                                                                                                                                                                                                                                                                                                                                                                                                                                                                                                                                                                                                                                                                                                                                                                                                                                                                                                                                                                                                                                                                                                                                                                                                                                                                                                                                                                                                                                                                                                                                                                                                                                                                                                                                                                                                                                                                                                                                                                                                                                                                                                                                                                                                                                                                                                                                                                                                                                                                                                                                                                                                                                                                                                                                                                                                                                                                                   |     |
|------------|-----------|---------|-------------|----------|----------|----------|---------------------------------------------------------------------------------------------------------------------------------------------------------------------------------------------------------------------------------------------------------------------------------------------------------------------------------------------------------------------------------------------------------------------------------------------------------------------------------------------------------------------------------------------------------------------------------------------------------------------------------------------------------------------------------------------------------------------------------------------------------------------------------------------------------------------------------------------------------------------------------------------------------------------------------------------------------------------------------------------------------------------------------------------------------------------------------------------------------------------------------------------------------------------------------------------------------------------------------------------------------------------------------------------------------------------------------------------------------------------------------------------------------------------------------------------------------------------------------------------------------------------------------------------------------------------------------------------------------------------------------------------------------------------------------------------------------------------------------------------------------------------------------------------------------------------------------------------------------------------------------------------------------------------------------------------------------------------------------------------------------------------------------------------------------------------------------------------------------------------------------------------------------------------------------------------------------------------------------------------------------------------------------------------------------------------------------------------------------------------------------------------------------------------------------------------------------------------------------------------------------------------------------------------------------------------------------------------------------------------------------------------------------------------------------------------------------------------------------------------------------------------------------------------------------------------------------------------------------------------------------------------------------------------------------------------------------------------------------------------------------------------------------------------------------------------------------------------------------------------------------------------------------------------------------------------------------------------------------------------------------------------------------------------------------------------------------------------------------------------------------------------------------------------------------------------------------------------------------------------------------------------------------------------------------------------------------------------------------------------------------------------------------------------------------------------------------------------------------------------------------------------------------------------------------------------------------------------------------------------------------------------------------------------------------------------------------------------------------------------------------------------------------------------------------------------------------------------------------------------------------------------------------------------------------------------------|-----|
| GO:0044464 | cell part | 856/942 | 14556/17046 | 1.50E-07 | 2.05E-05 | 1.81E-05 | <p>AKT3/ABI1/CDH3/TANK/CD300LD/GNE/ZNF783/CDH9/TSPAN5/CDH12/CDH13/SUGP2/MBNL2/FARP1/KLRG1/RCAN2/KCNMB2/CDKN1C/SPEG/BCKDK/TCIRG1/MRVI1/TRDN/ABCA9/C1D/COG5/ZBTB18/PITRM1/TACC2/MTHFS/PDPN/DMRT2/CELF1/CELF2/TBR1/SEPT9/GJB6/HCT/NPFFR2/ADCY3/PNRC1/TMED10/SLC27A2/LECT1/RER1/ADAM29/HNRPUL1/RPP14/HIBADH/CHGA/CHI3L1/ERLIN2/PSIP1/PKP3/EGLN2/PXMP4/ATXN2L/B4GALT7/KIF12/ACOT7/EXOC3/CHRNA1/CHRNA2/CHRNA5/GPRIN1/CIDEA/GBP4/ALPK2/PANX3/RBP7/GALNT15/AP3S1/CLCA1/C10orf90/FAT3/CLN5/MRPL52/FRMD6/CCR1/SLC51B/C15orf27/SPATA33/SLC38A10/SEZ6/KRT40/TNFAIP8L1/MOB3A/CNP/APOA1BP/NEU4/COL9A3/COL11A1/LYPD6B/GALM/SCLT1/MAP3K8/ZFP42/ADM/IL131RA/UBLCP1/HUS1B/OR2A14/CPM/CPS1/NDUFAF6/PXDNL/CRABP1/ZNF358/TRPM6/MIB2/PARP4/MPP7/LDLRAD3/FAM101A/B3GLCT/CEP128/MGAT5B/APCDD1/CSTA/KLC3/ZNF738/CTGF/XKR3/SMYD1/SGOL1/PPM1L/SH3D19/CYLD/MBOAT1/ADRB3/ESCO2/CYP11A1/ZNF782/FITM1/ADAL/TRPV3/ZNF709/ZNF781/CALML6/CITED4/DOB1/WBP2NL/DDOST/RNF168/ZNF366/BHLHA15/PPP1R18/NLRP6/DIO3/DLG2/DMBT1/DNAH6/DNAH8/DNMT3A/ABAT/DPH1/DRD4/DSG3/DTNA/ECE1/AGXT/EEF2/EFNA2/EGFR/EGR3/PATL2/EIF4G1/A2M/ELK4/ANKRD23/TMEM17/LIPH/EML1/UNC13D/DNAH12/SLC10A4/SMIM14/ENO2/ADCK5/EPHA1/EPHA3/EPHB4/ESR1/ALAS1/F11/FAH/FAT2/SPATA13/PRSS54/FCGR2A/RNF182/PHACTR1/SP8/FGA/FGF10/FHIT/XRN2/RASA3/PPM1E/VASH1/BTBD3/TRAK1/MSRB2/ACIN1/FOXL1/FOXC2/FOXC0/EXP5/AKR1B1/SPG20/NFASC/EPB41L3/GGA3/FLNB/DIP2A/FLOT2/MLC1/TBC1D1/RHOB2/NUP210/SEL1L3/ATP11A/NEDD4L/SYNE1/PSD3/LARP1/PPP1R13B/PUM2/ARHGFE18/RYPB/MORC3/MAPK8IP2/TSSK2/VGLL2/MTOR/FUCA1/WDR27/SLC37A4/GABBR1/RASGEF1C/RNF144B/ZNF549/CCDC110/ST6GALNAC3/NUTM1/GAK/SAMM50/DFNB31/ALS2CL/PNKD/SEC31B/TENM4/ACOT11/FAM169A/RAI14/RGS22/STEAP2/GAS2/FBXL21/FBXO2/LCE2B/SACS/GATM/GBGT1/GAPDHS/PLEK2/SLC17A5/ADGRF1/RPS6K1/PABPC1/AKAP8L/GJA3/DNAJC2/FGF22/NPTN/GJB2/AMPD2/SDCBP2/PDE7B/CYTH4/GLS2/VPS4A/AMPD3/GPR162/DHHDH/BMP10/ZNF638/GNAS/ZNF311/CRACR2B/PIGW/IZUMO1/ZNF844/THEM5/GPR26/GPER1/EOGT/DOK7/FFAR2/TRIM42/GRB10/MRPS18B/FLVCR1/GRIK4/ZBTB44/DNAJC15/SCG3/GSTP1/GTF2B/BRF1/TMOD4/GUCY1A3/CCDC106/NME7/GPR132/PADI1/GZMA/ANXA2/HAS1/SOX8/KCNIP2/NRG1/ANXA6/HK1/HLA-B/HLA-DOA/HLA-DPA1/ANXA13/HLA-E/HLA-F/HLX/HMGA1/NR4A1/ACACB/HPCA/APBA2/HOXB3/HOXC4/HOXC5/HOXC6/HOXD3/HRH1/HSD11B1/HSD17B2/ACADL/HSPA1L/HSP90AA1/HSP90AB1/HTR3A/HTR5A/DUPD1/TFA/P2E/ID3/ZC3H12D/COL28A1/RSP02/FMN1/CD300E/BARHL2/NME9/IGF1/IGF2/GPR142/LCE1C/LCE1D/LCE2D/IL1R1/IL1RN/IL6/IL10RA/AQP2/IL11RA/IL12RB2/IL15RA/PRSS41/IL16/FOXK2/AQP5/INPP5A/IRF1/AQP9/ISL1/ITGA7/ITGB2/ITGB7/ITIH4/IVL/JUP/CD82/USP50/HILS1/ATP9B/KCNH2/KCNJ8/KCNJ9/KCNMB1/KDR/ACAT1/KIF25/POPO/KRT7/KRT15/INSC/TOMM20L/CLEC17A/HESS/SLC6A17/RESP18/CDHR4/AFF3/STMN1/OR2A5/LCK/LCP1/MUC21/LDLR/ARHGDI/LGALS9/LHCGR/LLGL1/LMNA/LMO2/RAB19/LOX/LPP/LTB/SMAD3/MC2R/MCC/ME1/ME2/MEF2D/MAP3K1/MEOX1/MEOX2/MFI2/MFNG/MGAT1/MITF/LHX8/ASGR1/MOCS1/MOV10/MPZ/MT1A/NUDT1/MYH4/MYL2/NUBP1/NDUFB4/DRG1/NEDD9/NEU1/ATP1A2/NFATC3/NFYB/NHLH2/NMBR/NOV/NPPC/NRAS/NTF3/OAS2/WRAP73/OPRL1/OR2C1/OR3A2/SLC22A18/P2RY6/PFAH2/ATP5B/DEF6/ANO7/PALM/ARHGFE3/PARK2/BOLA1/UTP11L/LEF1/DDX47/CHST15/PDE4C/PCYOX1/PDE7A/C11orf73/SIRT6/PDE6B/ATP8A2/GALNT7/PGAM2/PIGC/PIK3CG/PITX2/PKHD1/PKM/PLA2G2A/PLAGL1/SPA17/PLEC/PRKAG3/PML/RIPPLY3/FXYD6/GPR84/IL20RB/SLCO1C1/RIPK4/TLR9/TREM1/POMC/SSH1/PON1/RIN2/MOV10L1/POU2AF1/ZDHC13/APBB1P/MXRA8/FBLIM1/BNC2/MED18/PALMD/CYP2W1/RPP25/LPCAT2/BANP/PPP1CB/HERC6/PPP1CC/PIWIL2/ELP3/ARHGFE10L/PRMT6/DNAJC17/GOLPH3L/ZNF532/PPP2R2B/FANCI/MOB1A/SLC47A1/SLC29A3/MIS18BP1/WDR33/TRPV6/SMPD3/SLC30A10/CNOT11/CHRNA9/SYBU/PEX26/LIMS2/FRMD4A/VAC14/CARKD/PARVA/PRKAR1B/TTC17/IFT122/CFAP44/ERMARD/MCTP2/LMBRD1/CSGALNACT1/PAG1/CISD1/PRKD1/WSB2/MYNN/BIN3/APOBR/MAPK3/MAP2K2/PCDHGC4/PCDHGB7/PCDHGB3/PCDHGA11/PRKRIR/PROC/MRAP/TRPV5/PRMT8/HTRA1/SLAMF8/CD42SE1/PSMB4/PAK6/ARNTL2/RGMA/PRDM11/TRPC7/LPAR5/PSMD7/ACTR3B/PTGFR/PLEKHG5/TENM2/GATAD2B/ERMN/KLHL8/RDH14/METT14/MARK4/CCAR2/PTPRCAP/PTPRE/PXN/CREBZF/FAM60A/ACTA2/RASGRF2/RFC2/TRIM27/RGR/RGS12/RIT2/EXOC4/RPA3/RPL8/DEFB134/RPL29/S100A4/S100A5/S100A6/BGLAP/CCL11/ABHD4/MRPS14/NPAS3/C19orf33/PARVG/NOD2/STRA6/CXCR5/MAP1LC3B2/ARHGAP9/TRA2B/GZF1/DNAI2/SGK1/CLDN25/SYNDIG1L/MICAL1/CERK/PCDH20/TMEM237/VPS33A/BMP4/SLC4A1/SPATS2/</p> | 856 |
|------------|-----------|---------|-------------|----------|----------|----------|---------------------------------------------------------------------------------------------------------------------------------------------------------------------------------------------------------------------------------------------------------------------------------------------------------------------------------------------------------------------------------------------------------------------------------------------------------------------------------------------------------------------------------------------------------------------------------------------------------------------------------------------------------------------------------------------------------------------------------------------------------------------------------------------------------------------------------------------------------------------------------------------------------------------------------------------------------------------------------------------------------------------------------------------------------------------------------------------------------------------------------------------------------------------------------------------------------------------------------------------------------------------------------------------------------------------------------------------------------------------------------------------------------------------------------------------------------------------------------------------------------------------------------------------------------------------------------------------------------------------------------------------------------------------------------------------------------------------------------------------------------------------------------------------------------------------------------------------------------------------------------------------------------------------------------------------------------------------------------------------------------------------------------------------------------------------------------------------------------------------------------------------------------------------------------------------------------------------------------------------------------------------------------------------------------------------------------------------------------------------------------------------------------------------------------------------------------------------------------------------------------------------------------------------------------------------------------------------------------------------------------------------------------------------------------------------------------------------------------------------------------------------------------------------------------------------------------------------------------------------------------------------------------------------------------------------------------------------------------------------------------------------------------------------------------------------------------------------------------------------------------------------------------------------------------------------------------------------------------------------------------------------------------------------------------------------------------------------------------------------------------------------------------------------------------------------------------------------------------------------------------------------------------------------------------------------------------------------------------------------------------------------------------------------------------------------------------------------------------------------------------------------------------------------------------------------------------------------------------------------------------------------------------------------------------------------------------------------------------------------------------------------------------------------------------------------------------------------------------------------------------------------------------------------------------------------------|-----|

|            |               |         |            |          |         |         |                                                                                                                                                                                                                                                                                                                                                                                                                                                                                                                                                                                                                                                                                                                                                                                                                                                                                                                                                                                                                                                                                                                                                                                                                                                                                                                                                                                                                                                                                                                                                                                                                                                                                                                                                                                                                                                                                                                                                                                                                                                                                                                                                                                                                                                                                                                                                                                                                                                                                                                                                                                                                                                                                                                                                                                                                                                                                                                                                                                                                                                                                                                                                                                                                                                                                                                                                                                               |     |
|------------|---------------|---------|------------|----------|---------|---------|-----------------------------------------------------------------------------------------------------------------------------------------------------------------------------------------------------------------------------------------------------------------------------------------------------------------------------------------------------------------------------------------------------------------------------------------------------------------------------------------------------------------------------------------------------------------------------------------------------------------------------------------------------------------------------------------------------------------------------------------------------------------------------------------------------------------------------------------------------------------------------------------------------------------------------------------------------------------------------------------------------------------------------------------------------------------------------------------------------------------------------------------------------------------------------------------------------------------------------------------------------------------------------------------------------------------------------------------------------------------------------------------------------------------------------------------------------------------------------------------------------------------------------------------------------------------------------------------------------------------------------------------------------------------------------------------------------------------------------------------------------------------------------------------------------------------------------------------------------------------------------------------------------------------------------------------------------------------------------------------------------------------------------------------------------------------------------------------------------------------------------------------------------------------------------------------------------------------------------------------------------------------------------------------------------------------------------------------------------------------------------------------------------------------------------------------------------------------------------------------------------------------------------------------------------------------------------------------------------------------------------------------------------------------------------------------------------------------------------------------------------------------------------------------------------------------------------------------------------------------------------------------------------------------------------------------------------------------------------------------------------------------------------------------------------------------------------------------------------------------------------------------------------------------------------------------------------------------------------------------------------------------------------------------------------------------------------------------------------------------------------------------------|-----|
| GO:0016020 | membrane      | 522/942 | 8177/17046 | 1.50E-06 | 0.00016 | 0.00014 | <p>AKT3/ABI1/CDH3/SMIM6/CD300LD/CCDC180/CDH9/TSpan5/CDH12/CDH13/FARP1/KLRG1/KCNMB2/TCIRG1/MRV1/TRDN/ABCA9/COG5/PDPN/CEL1/GJB6/HCST/NPFFR2/ADCY3/TMED10/SLC27A2/LECT1/RER1/ADAM29/CHGA/ERLIN2/PKP3/PXMP4/ATXN2L/B4GALT7/EXOC3/CHRNA1/CHRNA2/CHRNA5/GPRIN1/SORCS1/PANX3/GALNT15/AP3S1/CLCA1/FAT3/CLN5/MRPL52/FRMD6/CCR1/SLC51B/C15orf27/SLC38A10/SEZ6/CNP/NEU4/LYPD6B/SCLT1/IL131RA/OR2A14/CPD/CPM/CPS1/NDUFAF6/TRPM6/PARP4/MPP7/DLDRAD3/B3GLCT/LYSMD4/MGAT5B/APCDD1/CSTA/CTGF/ABCC13/XKR3/PPM1L/SH3D19/CYB561/CYLD/MBOAT1/ADRB3/ANKRD46/CYP11A1/FITM1/TRPV3/DDOST/NLRP6/DIO3/DLG2/DMBT1/DRD4/DSG3/DTNA/ECE1/EEF2/EFNA2/EGFR/EIF4G1/TMEM17/LIPH/UNC13D/SLC10A4/SMIM14/ENO2/ADCK5/EPHA1/EPHA3/EPHB4/ESR1/F11/FAT2/SPATA13/FCGR2A/RNF182/FGA/FGF10/XRN2/RASA3/ACIN1/TBC1D9B/SPG20/NFASC/EPB41L3/GGA3/FLNB/FLOT2/MLC1/RHOBTB2/NUP210/SEL1L3/ATP11A/NEDD4L/SYNE1/PSD3/LARP1/PPP1R13B/PUM2/MTOR/SLC37A4/GABBR1/RNF144B/STG6GALNAC3/TMEM151A/GAK/SAMM50/PNKD/SEC31B/TENM4/FAM169A/RGS22/STEAP2/GAS2/FBXO2/LCE2B/GATM/GBGT1/PLEK2/SLC17A5/ADGRF1/RPS6KC1/PABPC1/GJA3/DNAJC2/NPTN/GJB2/SDCBP2/CYTH4/VPS4A/GPR162/GNAS/TMPRSS12/PIGW/IZUMO1/GPR26/GPER1/DOK7/DCBLD1/FFAR2/GRB10/MRPS18B/FLVCR1/GRIK4/DNAJC15/SCG3/GSTP1/GUCY1A3/GPR132/GZMA/ANXA2/HAS1/KCNIP2/NRG1/ANXA6/HK1/HLA-B/HLA-DOA/HLA-DPA1/ANXA13/HLA-E/HLA-F/NR4A1/ACACB/HPCA/APBA2/AGFG2/HRH1/HSD11B1/HSD17B2/ACADL/HSP90AA1/HSP90AB1/HTR3A/HTR5A/MS4A10/FMN1/CD300E/IGF1/IGF2/GPR142/LCE1C/LCE1D/LCE2D/IL1R1/IL1RN/IL6/IL10RA/AQP2/IL11RA/IL12RB2/IL15RA/PRSS41/IL16/AQP5/INPP5A/AQP9/ITGA7/ITGB2/ITGB7/ITIH4/IVL/JUP/CD82/ATP9B/KCNH2/KCNJ8/KCNJ9/KCNMB1/KDR/CAT1/IPO5/AMIGO3/TOMM20L/CLEC17A/SLC6A17/CDHR4/STMN1/OR2A5/LCK/LCP1/MUC21/LDLR/LHCGR/LLGL1/C11orf87/LMNA/RAB19/LPP/LTB/SMAD3/MC2R/MCC/MF12/MFNG/MGAT1/ASGR1/MPZ/NUBP1/NDUFB4/DRG1/NEU1/ATP1A2/NMBR/NRAS/OAS2/OPRL1/OR2C1/OR3A2/SLC22A18/P2RY6/ATP5B/IL21R/DEF6/ANO7/PALM/DDX47/CEND1/CST1/HST15/PCYOX1/PDE6B/HIGD1B/ATP8A2/GALNT7/PIGC/PIK3CG/PKHD1/PKM/PLA2G2A/SPA17/LRP1B/PLEC/PML/FXYD6/GPR84/IL20RB/SLCO1C1/RIPK4/TLR9/TREM1/SSH1/ZDHH1/C13/APBB1P/ROBO4/MXRA8/BNC2/PALMD/CYP2W1/LPCAT2/FAM118A/GOLPH3L/PPP2R2B/FANCI/SLC47A1/SLC29A3/TRPV6/SMPD3/SLC30A10/CHRNA9/SYBU/PEX26/LIMS2/VAC14/PARVA/PRKAR1B/TTC17/IFT122/ERMARD/MCTP2/LMBRD1/CSGALNACT1/PAG1/CISD1/PRKD1/APOBR/MAPK3/MAP2K2/PCDHGC4/PCDHGB7/PCDHGB3/PCDHGA11/MRAP/TRPV5/PRMT8/SLAMF8/CDC42SE1/RGMA/CEACAM19/TRPC7/LPAR5/PSMD7/PTGFR/PLEKHG5/TENM2/RNF150/RDH14/PTPRCAP/PTPRE/PXN/RASGRF2/TRIM27/RGR/RGS12/RIT2/EXOC4/RPL8/CTXN3/RPL29/S100A6/MRPS14/PARVG/NOD2/STRA6/CXCR5/MAP1LC3B2/DNAI2/SGK1/CLDN25/SYNDIG1L/CERK/PCDH20/TMEM237/VPS33A/SLC4A1/ZG16/SLC6A12/SLC8A1/SLC9A3/SLC20A2/BMPR1B/TMEM108/LYNX1/BOK/BPI/STAT2/STK10/BST2/VAMP2/ACT1/TGM2/TLR5/TRAPPC10/TNFRSF1A/TRAFF5/TRPC4/TRPC6/TRPM2/PHLDA2/CR2/TNFRSF4/UCP1/YWHAG/ZAP70/CACNA1E/PTP4A1/CACNB2/MOGS/CXCR4/FZD5/RAB7A/REEP5/CARD14/GDPD3/BCL2L14/LST1/CERS4/TMEM204/NLRX1/IGFLR1/ERMP1/CALD1/PSCA/FAM188A/TMEM62/GPR157/ZC3H12A/RAB11FIP1/C6orf25/CLPTM1L/CALR/UNC93B1/CAPS/CAST/GSG1/HIST1H3A/SLC25A18/ANTXR1/SLA2/MFSD7/CMAHP/BFSP2/ATP13A4/YIPF4/CASQ1/PARD6G/FAXC/PARD6B/LOXL3/MGARP/RAE1/SLC43A1/IFITM1/ITPRIP/KMO/IRS2/ACTN1/FADD/TNFRSF11A/SYNJ2/SPHK1/ENDOU/SKAP2/STBD1/SLAMF9/TSPAN18/CH25H/CCR1/SLC16A3/RSAD2/SMDT1/IL32/CD8A/REEP6/TRIP10/SDR42E1/LY86/RAB3D/ENTPD3/RAB36/NUP93/RAPGEF2/ULK2/USP6NL/CD79A/TELO2/TMCC2/IQSEC1/LPGAT1</p> | 522 |
| GO:0030054 | cell junction | 96/942  | 1073/17046 | 1.62E-06 | 0.00016 | 0.00014 | <p>ABI1/CDH3/CDH13/FARP1/GJB6/PKP3/CHRNA1/CHRNA2/CHRNA5/PANX3/FRMD6/EGFLAM/MPP7/DLDRAD3/DLG2/DSG3/DTNA/EGFR/ANKRD23/FAT2/PHACTR1/AKR1B1/NFASC/EPB41L3/FLNB/FLOT2/PSD3/ARHGEF18/GABBR1/GAK/SLC17A5/PABPC1/GJA3/GJB2/GPER1/DOK7/MRPS18B/GRIK4/ANXA6/HMGA1/HOXC5/HTR3A/FMN1/GPR142/ITGA7/JUP/KDR/SLC6A17/LCK/LCP1/LPP/NEDD9/NEU1/ATP1A2/NOV/ANO7/C11orf73/PLEC/APBB1P/FBLIM1/PPP1CB/PPP1CC/CHRNA9/LIMS2/FRMD4A/PARVA/PRKD1/MAPK3/MAP2K2/PLEKHG5/TENM2/PXN/RPL8/PARVG/CLDN25/SLC8A1/SRP68/VAMP2/ACT1/TGM2/TRPC4/TRPC6/YWHAG/ZAP70/CXCR4/FZD5/TMEM204/CALR/COLQ/PARD6G/PARD6B/ACTN1/LIMD1/SYT7/ESAM/RAPGEF2</p>                                                                                                                                                                                                                                                                                                                                                                                                                                                                                                                                                                                                                                                                                                                                                                                                                                                                                                                                                                                                                                                                                                                                                                                                                                                                                                                                                                                                                                                                                                                                                                                                                                                                                                                                                                                                                                                                                                                                                                                                                                                                                                                                                                                                                                                                                                                                                                                                                                                                                                                                                                                                                                                                                                                                                                                    | 96  |

|            |                           |         |            |          |         |         |                                                                                                                                                                                                                                                                                                                                                                                                                                                                                                                                                                                                                                                                                                                                                                                                                                                                                                                                                                                                                                                                                                                                                                                                                                                                                                                                                                                                                                                                                                                                                                                                                                                                                                                                                                                                                                                                                                                                                                                                                                                                                                                                                                                                                                                                                                                                                                                                                                                                                                                                                                                                                                                                                                                                                                                                                                                                                                                                                                                                                                                                                                                                                                                                                                                                                                                                                                                                                                                                                                                                                                                                                                                                                                                                                                                                                                                                                                 |     |
|------------|---------------------------|---------|------------|----------|---------|---------|-------------------------------------------------------------------------------------------------------------------------------------------------------------------------------------------------------------------------------------------------------------------------------------------------------------------------------------------------------------------------------------------------------------------------------------------------------------------------------------------------------------------------------------------------------------------------------------------------------------------------------------------------------------------------------------------------------------------------------------------------------------------------------------------------------------------------------------------------------------------------------------------------------------------------------------------------------------------------------------------------------------------------------------------------------------------------------------------------------------------------------------------------------------------------------------------------------------------------------------------------------------------------------------------------------------------------------------------------------------------------------------------------------------------------------------------------------------------------------------------------------------------------------------------------------------------------------------------------------------------------------------------------------------------------------------------------------------------------------------------------------------------------------------------------------------------------------------------------------------------------------------------------------------------------------------------------------------------------------------------------------------------------------------------------------------------------------------------------------------------------------------------------------------------------------------------------------------------------------------------------------------------------------------------------------------------------------------------------------------------------------------------------------------------------------------------------------------------------------------------------------------------------------------------------------------------------------------------------------------------------------------------------------------------------------------------------------------------------------------------------------------------------------------------------------------------------------------------------------------------------------------------------------------------------------------------------------------------------------------------------------------------------------------------------------------------------------------------------------------------------------------------------------------------------------------------------------------------------------------------------------------------------------------------------------------------------------------------------------------------------------------------------------------------------------------------------------------------------------------------------------------------------------------------------------------------------------------------------------------------------------------------------------------------------------------------------------------------------------------------------------------------------------------------------------------------------------------------------------------------------------------------------|-----|
| GO:0005737 | cytoplasm                 | 604/942 | 9735/17046 | 3.88E-06 | 0.00033 | 0.00029 | AKT3/ABI1/CDH3/TANK/GNE/CDH13/MBNL2/FARP1/RCAN2/CDKN1C/BCKDK/TCIRG1/MRVI1/TRDN/ABCA9/C1D/COG5/PITRM1/TACC2/MTHFS/CELF1/CELF2/SEPT9/GJB6/ADCY3/TMED10/SLC27A2/RER1/HIBADH/CHGA/CHI3L1/ERLIN2/PSIP1/EGLN2/PXMP4/ATXN2L/B4GALT7/KIF12/ACOT7/EXO33/CIDEA/GBP4/RBP7/GALNT15/AP351/CLCA1/C10orf90/CLN5/MRPL52/FRMD6/CCR1/SPATA33/SLC38A10/SEZ6/TNFAIP8L1/CNP/APOA1BP/NEU4/COL9A3/COL11A1/GALM/SCLT1/MAP3K8/ZFP42/ADM/CP51/NDUF46/PXDNL/CRABP1/MIB2/PARP4/MPP7/FAM101A/B3GLCT/CEP128/MGAT5B/CSTA/KLC3/CTGF/SMYD1/SGOL1/PPM1/SH3D19/CYLD/MBOAT1/ESCO2/CYP11A1/FITM1/ADAL/CALML6/CITED4/DBB1/WB P2NL/DDOST/RNF168/PPP1R18/NLRP6/DIO3/DMBT1/DNAH6/DNAH8/DNMT3A/ABAT/DPH1/DRD4/DSG3/DNA/ECE1/AGXT/EEF2/EGFR/EGR3/PATL2/EIF4G1/A2M/ELK4/ANKRD23/EML1/UNC13D/DNAH12/SMIM14/ENO2/ADCK5/EPHA3/EPHB4/ESR1/ALAS1/FAH/SPATA13/PRSS54/RNF182/PHACTR1/FGA/FHIT/RASA3/PPM1E/VASH1/BTBD3/TRAK1/MSRB2/ACIN1/FOXO1/EXPH5/AKR1B1/SPG20/EPB41L3/GGA3/FLNB/FLOT2/MCL1/TBC1D1/RHOBTB2/NUP210/ATP11A/NEDD4L/SYNE1/LARP1/PPP1R13B/PUM2/ARHGEF18/RYPB/MAPK8/IP2/TSSK2/VGLL2/MTOR/FUCA1/SLC37A4/GABBR1/RNF144B/CCDC110/STGALNAC3/NUTM1/GAK/SAMM50/DFNB31/ALS2CL/PNKD/SEC3B/TENM4/ACOT11/RAI14/RGS22/STEA P2/GAS2/FBXL21/FBXO2/LCE2B/SACS/GATM/GBGT1/GAPDHS/PLEK2/SLC17A5/RPS6KC1/PABPC1/AKAP8L/DNAJC2/FGF22/NPTN/GJB2/AMPD2/SDCBP2/PDE7B/GLS2/VPS4A/AMP D3/DHHDH/BMP10/ZNF638/GNAS/CRACR2B/PIGW/IZUMO1/THEM5/GPER1/EOGT/GRB10/MRPS18B/FLVCR1/DNAJC15/SCG3/GSTP1/TMOD4/GUCY1A3/CCDC106/PAD11/ANXA2/H AS1/SOX8/KCNIP2/NRG1/ANXA6/HK1/HLA-B/HLA-DOA/HLA-DPA1/ANXA13/HLA-E/HLA-F/HMGA1/NR4A1/ACACB/HPCA/APBA2/HOXC6/HRH1/HSD11B1/HSD17B2/ACADL/HSPA1L/HSP90AA1/HSP90AB1/HTR3A/HTR5A/DUPD1/ID3/ZC3H12D/COL28A1/FMN1/BARHL2/NME9/IGF1/IGF2/GPR142/LCE1C/LCE1D/LCE2D/IL1RN/IL6/AQP2/IL15RA/IL16/AQP5/IRF1/ISL1/ITGA7/ITIH4/IVL/JUP/ATP9B/KCNH2/KCNJ8/KDR/ACAT1/KIF25/IPO5/KRT7/INSC/TO MM20L/SLC6A17/RESP18/AFF3/STMN1/LCK/LCP1/MUC21/LDLR/ARHGDI1/LGALS9/LHCGR/LGL1/LMNA/RAB19/LPP/SMAD3/MC2R/MCC/ME1/ME2/MEF2D/MAP3K1/MEOX1/M EOX2/MFNG/MGAT1/MITF/MOCS1/MOV10/MPZ/MT1A/NUDT1/MYH4/MYL2/NUBP1/NDUFB4/DRG1/NEDD9/NEU1/ATP1A2/NFATC3/NMBR/NOV/NPPC/NRAS/NTF3/OAS2/WRA P73/OPRL1/OR2C1/SLC22A18/PFAH2/ATP5B/DEF6/ANO7/PALM/ARHGEF3/PARK2/BOLA1/UTP11L/LEF1/CHST15/PDE4C/PCYOX1/PDE7A/C11orf73/SIRT6/PDE6B/ATP8A2/GALNT 7/PGAM2/PIGC/PIK3CG/PITX2/PKHD1/PKM/PLA2G2A/PLAGL1/SPA17/PLEC/PRKAG3/PML/RIPK4/TLR9/POMC/SSH1/RIN2/ZDHHC13/APBB1P/FBLIM1/BNC2/PALMD/CYP2W1/LPC AT2/PPP1CB/HERC6/PPP1CC/PIWIL2/ELP3/ARHGFE10L/PRMT6/DNAJC17/GOLPH3L/PPP2R2B/FANCI/MOB1A/SLC29A3/SMPD3/CNOT11/CHRNA9/SYBU/PEX26/LIMS2/FRMD4A/V AC14/CARKD/PARVA/PRKAR1B/TTC17/IFT122/ERMARD/LMBRD1/CSGALNACT1/CISD1/PRKD1/BIN3/MAPK3/MAP2K2/PROC/MRAP/PRMT8/HTRA1/CDC42SE1/PSMB4/PAK6/ARNT L2/RGMA/PRDM11/TRPC7/PSMD7/ACTR3B/PTGFR/PLEKHG5/TENM2/ERMN/RDHD1/METT14/MARK4/CCAR2/PTPRE/PXN/ACTA2/RASGRF2/RFC2/TRIM27/RGS12/EXOC4/RPL8/R PL29/S100A4/S100A6/BGLAP/MRPS14/NPAS3/PARVG/NOD2/MAP1LC3B2/ARHGAP9/GZF1/DNAI2/SGK1/SYNDIG1L/MICAL1/CERK/VPS33A/BMP4/SLC4A1/SPATS2/ZG16/SLC8A1/ BOK/BPI/SRP68/STAT2/STK3/STK10/BST2/VAMP2/TAF4B/TBP/TCEB2/ZEB1/ACTC1/TERF1/TGM2/TIMP3/TRAPP3/TNFRSF1A/TRAFA1/TRAFA5/TRPCA/TRPC6/PHLDA2/CCR 2/UCP1/UPP1/VARS/YWHAG/ZAP70/CA7/PTP4A1/MOGS/CXCR4/FZD5/RAB7A/ER13/CARD14/BCL2L14/LST1/CERS4/NLRX1/CSPP1/ZC3H14/ERMP1/CALD1/ZNF606/ZC3H12A/RAB1 1FIP1/FAAP100/CPEB4/RNF39/C6orf25/COL18A1/ZNF436/CALR/COL21A1/UNC93B1/QTRT1/SLIRP/CAPS/CAST/CAPZB/SH3BGR13/GSG1/CCDC3/DYNLRB2/SLC25A18/SPATA16/AN TXR1/SLA2/CMAP/BFSP2/ATP13A4/YIPF4/ZNF397/NROB2/CASQ1/PARD6G/PARD6B/TTBK1/TRIM63/LOXL3/GTPBP3/MGARP/RAE1/C1orf198/GAS7/SCIN/KMO/RUNX1/TP63/RU NX3/IRS2/ACTN1/CRADD/FADD/ALDH1A2/SYNJ2/SPHK1/CCNA1/ENDOU/SKAP2/STBD1/HSPB3/LIMD1/CH25H/ERI1/MAP7/PRC1/STARD13/ZFAND2A/MAP3K6/SYT7/RSAD2/SMDT 1/AURKB/REEP6/TRIP10/ADIPOQ/ARHGAP29/RAB3D/PREPL/RAB36/MTL5/ARHGFE10/RAPGEF2/ULK2/USP6NL/CD79A/KIAA0513/DAZAP2/TELO2/RABGAP1L/LPGAT1 | 604 |
| GO:0005615 | extracellular space       | 102/942 | 1213/17046 | 1.15E-05 | 0.00088 | 0.00078 | CDH13/SPON2/CHI3L1/CHI3L2/C1QTNF7/CLCA1/ZG16B/SEZ6/CNP/APOA1BP/COMP/ADM/PXDNL/CSTA/CTGF/DBB1/DMBT1/EGFR/A2M/LIPH/ENO2/F11/FGA/FGF10/VASH1/AKR 1B1/FGF22/DKK3/BMP10/GSTP1/ANXA2/SERPIND1/NRG1/ANXA13/HSPA1L/RSPO2/IGF1/IGF2/IL1R1/IL1RN/IL6/IL15RA/IL16/INHBA/ITIH4/LCP1/LDLR/LGALS9/LOX/LTB/MF12/MF NG/SCGB2A1/MOV10/IGFL4/NPPC/SPOCK3/UTP11L/ANGPT4/PDE4C/PCYOX1/PLA2G2A/PRKAG3/CYTL1/POMC/PON1/APOBR/PROC/MASP1/HTRA1/SLURP1/ACTA2/S100A4/BGLA P/SCT/CCL11/CCL17/TINAGL1/SFRP2/BMP4/SLC4A1/ZNF649/SLIT1/BPI/ACTC1/TIMP3/TNFRSF1A/TNXB/WNT10B/ZNF177/COL18A1/CALR/COLQ/IL1F10/LOXL3/PPFIB2/SERPINA6 /ACTN1/ENDOU/IL32/ADIPOQ/LY86                                                                                                                                                                                                                                                                                                                                                                                                                                                                                                                                                                                                                                                                                                                                                                                                                                                                                                                                                                                                                                                                                                                                                                                                                                                                                                                                                                                                                                                                                                                                                                                                                                                                                                                                                                                                                                                                                                                                                                                                                                                                                                                                                                                                                                                                                                                                                                                                                                                                                                                                                                                                                                                                                                                                                                                                                                                                                                                                                                                                                                                                                                                                                                                                                                                              | 102 |
| GO:0044421 | extracellular region part | 238/942 | 3516/17046 | 0.00023  | 0.01579 | 0.01397 | ABI1/CCDC180/CDH13/SPON2/ZBTB18/TMED10/SLC27A2/LECT1/CHI3L1/ERLIN2/CHI3L2/KIF12/ACOT7/C1QTNF7/CLCA1/CLN5/ZG16B/SEZ6/CNP/APOA1BP/COL9A3/COL11A1/GA LM/COMP/SCLT1/ADM/EGFLAM/CPD/CPM/PXDNL/PARP4/CSTA/CTGF/PPM1L/DBB1/COCH/DMBT1/ABAT/DSG3/ECE1/EEF2/EGFR/A2M/LIPH/ENO2/EPHB4/F11/FAH/FAT2/FCGR2 A/FGA/FGF10/FHIT/VASH1/AKR1B1/NFASC/FLNB/FLOT2/NEDD4L/ARHGFE18/FUCA1/SAMM50/ACOT11/FBXO2/GATM/PABPC1/FGF22/SDCBP2/DKK3/VPS4A/BMP10/GNAS/GSTP 1/PAD11/ANXA2/SERPIND1/NRG1/ANXA6/HLA-B/ANXA13/HLA-E/HSPA1L/HSP90AA1/HSP90AB1/ADAMTSL5/COL28A1/RSPO2/CD300E/IGF1/IGF2/CYR61/IL1R1/IL1RN/IL6/AQP2/IL15RA/IL16/AQP5/INHBA/INPP5A/ITGB2/ITGB7/ITIH3/ITIH4/IVL /JUP/CD82/ACAT1/KRT7/KRT15/LAMA3/STMN1/LCK/LCP1/MUC21/LDLR/ARHGDI1/LGALS9/RAB19/LOX/LTB/LTBP1/MF12/MFNG/MGAT1/SCGB2A1/MOV10/IGFL4/NUDT1/NUBP1 /NDUFB4/NEU1/ATP1A2/NOV/NPPC/NRAS/ATP5B/SPOCK3/UTP11L/ANGPT4/PDE4C/PCYOX1/C11orf73/GALNT7/PGAM2/P13/PKHD1/PKM/PLA2G2A/PLEC/PRKAG3/CYTL1/POMC/ PON1/ROBO4/MXRAS/PPP1CB/MOB1A/TRPV6/CISD1/APOBR/MAPK3/PROC/MASP1/HTRA1/PSMB4/RGMA/PSMD7/SLURP1/ACTR3B/ERMN/ACTA2/S100A4/S100A6/BGLAP/SCT/ CCL11/CCL17/TINAGL1/SFRP2/BMP4/SLC4A1/ZNF649/ZG16/SLC9A3/SLC20A2/SLIT1/LYNX1/BPI/STK10/BST2/VAMP2/TCEB2/ACTC1/TGM2/TIMP3/TNFAIP3/TNFRSF1A/TNXB/WNT 10B/YWHAG/ZNF177/PTP4A1/MOGS/CXCR4/RAB7A/REEP5/GDPD3/PSCA/COL18A1/CALR/COL21A1/CAPS/COLQ/CAPZB/HIST1H2BM/SH3BGR13/HIST1H3A/DYNLRB2/ANTXR1/PA RD6B/IL1F10/LOXL3/PPFIB2/SCIN/KMO/RUNX1/SERPINA6/ACTN1/ENDOU/SYT7/ESAM/IL32/TRIP10/ADIPOQ/LY86/RAB3D/H2AFY                                                                                                                                                                                                                                                                                                                                                                                                                                                                                                                                                                                                                                                                                                                                                                                                                                                                                                                                                                                                                                                                                                                                                                                                                                                                                                                                                                                                                                                                                                                                                                                                                                                                                                                                                                                                                                                                                                                                                                                                                                                                                                                                                                                                                                                                                                                                                                                         | 238 |
| GO:0042588 | zymogen granule           | 5/942   | 12/17046   | 0.00029  | 0.01812 | 0.01603 | TMED10/DMBT1/ZG16/VAMP2/RAB3D                                                                                                                                                                                                                                                                                                                                                                                                                                                                                                                                                                                                                                                                                                                                                                                                                                                                                                                                                                                                                                                                                                                                                                                                                                                                                                                                                                                                                                                                                                                                                                                                                                                                                                                                                                                                                                                                                                                                                                                                                                                                                                                                                                                                                                                                                                                                                                                                                                                                                                                                                                                                                                                                                                                                                                                                                                                                                                                                                                                                                                                                                                                                                                                                                                                                                                                                                                                                                                                                                                                                                                                                                                                                                                                                                                                                                                                                   | 5   |

|            |                          |         |             |         |         |         |                                                                                                                                                                                                                                                                                                                                                                                                                                                                                                                                                                                                                                                                                                                                                                                                                                                                                                                                                                                                                                                                                                                                                                                                                                                                                                                                                                                                                                                                                                                                                                                                                                                                                                                                                                                                                                                                                                                                                                                                                                                                                                                                                                                                                                                                                                                                                                                                                                                                                                                                                                                                                                                                                                                                                                                                                                                                                                                                                                                                                                                                                                                                                                                                                                                                                                                                                                                                                                                                                                                                                                                                                                                                                                                                                                                                                                                                                                                                                                                                                                                                                                                                                                                    |     |
|------------|--------------------------|---------|-------------|---------|---------|---------|------------------------------------------------------------------------------------------------------------------------------------------------------------------------------------------------------------------------------------------------------------------------------------------------------------------------------------------------------------------------------------------------------------------------------------------------------------------------------------------------------------------------------------------------------------------------------------------------------------------------------------------------------------------------------------------------------------------------------------------------------------------------------------------------------------------------------------------------------------------------------------------------------------------------------------------------------------------------------------------------------------------------------------------------------------------------------------------------------------------------------------------------------------------------------------------------------------------------------------------------------------------------------------------------------------------------------------------------------------------------------------------------------------------------------------------------------------------------------------------------------------------------------------------------------------------------------------------------------------------------------------------------------------------------------------------------------------------------------------------------------------------------------------------------------------------------------------------------------------------------------------------------------------------------------------------------------------------------------------------------------------------------------------------------------------------------------------------------------------------------------------------------------------------------------------------------------------------------------------------------------------------------------------------------------------------------------------------------------------------------------------------------------------------------------------------------------------------------------------------------------------------------------------------------------------------------------------------------------------------------------------------------------------------------------------------------------------------------------------------------------------------------------------------------------------------------------------------------------------------------------------------------------------------------------------------------------------------------------------------------------------------------------------------------------------------------------------------------------------------------------------------------------------------------------------------------------------------------------------------------------------------------------------------------------------------------------------------------------------------------------------------------------------------------------------------------------------------------------------------------------------------------------------------------------------------------------------------------------------------------------------------------------------------------------------------------------------------------------------------------------------------------------------------------------------------------------------------------------------------------------------------------------------------------------------------------------------------------------------------------------------------------------------------------------------------------------------------------------------------------------------------------------------------------------------|-----|
| GO:0044459 | plasma membrane part     | 168/942 | 2392/17046  | 0.00047 | 0.02649 | 0.02344 | ABI1/TSPAN5/CDH13/FARP1/KCNMB2/TCIRG1/TRDN/PDPN/GJB6/NPFFR2/ADCY3/TMED10/ADAM29/CHRNA1/CHRNA2/CHRNA5/CLCA1/CCR1/TRPM6/MPP7/APCDD1/CYLD/ADR B3/DLG2/DRD4/DTNA/ECE1/EGFR/TMEM17/SLC10A4/EPHA1/EPHA3/EPHB4/SPATA13/FGA/RASA3/EPB41L3/FLOT2/MLC1/SYNE1/PSD3/GABBR1/TENM4/STEA2/PLEK2/SLC17A5 /GJA3/NPTN/GJB2/GNAS/GPR26/GPER1/FFAR2/FLVCR1/GRIK4/GPR132/GZMA/ANXA2/HAS1/KCNIP2/NRG1/HLA-B/HLA-DOA/HLA-DPA1/ANXA13/HLA-E/HLA- F/HPCA/HRH1/HSP90AA1/HSP90AB1/HTR3A/HTR5A/GPR142/IL1R1/IL6/AQP2/IL11RA/IL12RB2/AQP5/AQP9/ITGA7/ITGB2/ITGB7/JUP/CD82/KCNH2/KCNJ8/KCNJ9/KCNMB1/KDR/S LC6A17/LCK/LCP1/LDLR/LHCGR/MC2R/MFI2/ASGR1/MPZ/ATP1A2/NMBR/OPRL1/OR3A2/SLC22A18/P2RY6/PALM/PDE6B/PKH1/SPA17/FXYD6/GPR84/SLCO1C1/TLR9/APBB11P/T RPV6/CHRNA9/PRKD1/MAPK3/MAP2K2/TRPV5/TRPC7/PTGFR/TENM2/TRIM27/RGR/EXOC4/S100A6/NOD2/CXCR5/DNAI2/SLC4A1/SLC6A12/SLC8A1/SLC9A3/SLC20A2/BMPR1B/B PI/BST2/VAMP2/TGM2/TNFRSF1A/TRAF5/TRPC4/TRPC6/TRPM2/CCR2/TNFRSF4/ZAP70/CACNA1E/PTP4A1/CACNB2/CALR/ANTXR1/ATP13A4/CASQ1/SLC43A1/FADD/TNFRSF11A/ STBD1/TSPAN18/CCRL2/MAP7/SLC16A3/CD8A/TRIP10/RAPGEF2/CD79A                                                                                                                                                                                                                                                                                                                                                                                                                                                                                                                                                                                                                                                                                                                                                                                                                                                                                                                                                                                                                                                                                                                                                                                                                                                                                                                                                                                                                                                                                                                                                                                                                                                                                                                                                                                                                                                                                                                                                                                                                                                                                                                                                                                                                                                                                                                                                                                                                                                                                                                                                                                                                                                                                                                                                                                                                                                                                                                                                                                                                                                                                                 | 168 |
| GO:0044424 | intracellular part       | 730/942 | 12427/17046 | 0.00052 | 0.02649 | 0.02344 | AKT3/ABI1/CDH3/TANK/GNE/ZNF783/CDH13/SUGP2/MBNL2/FARP1/RCAN2/CDKN1C/SPEG/BCKDK/TCIRG1/MRV1/TRDN/ABCA9/C1D/COG5/ZBTB18/PITRM1/TACC2/MTHFS/DM RT2/CELF1/CELF2/TBR1/SEPT9/GJB6/NPFFR2/ADCY3/PNRC1/TMED10/SLC27A2/RER1/HNRNPUL1/RPP14/HIBADH/CHGA/CHI3L1/ERLIN2/PSIP1/PKP3/EGLN2/PXMP4/ATXN2L/B4G ALT7/KIF12/ACOT7/EXOC3/CIDEA/GBP4/ALPK2/RBP7/GALNT15/AP3S1/CLCA1/C10orf90/CLNS/MRPL52/FRMD6/CCR1/SPATA33/SLC38A10/SEZ6/KRT40/TNFAIP8L1/CNP/APOA1B P/NEU4/COL9A3/COL11A1/GALM/SCLT1/MAP3K8/ZFP42/ADM/UBLCP1/HUS1B/CPS1/NDUFAF6/PXDNL/CRABP1/ZNF358/MIB2/PARP4/MPP7/FAM101A/B3GLCT/CEP128/MGAT5 B/CSTA/KLC3/ZNF738/CTGF/SMYD1/SGOL1/PPM1L/SH3D19/CYLD/MBOAT1/ADRB3/ESCO2/CYP11A1/ZNF782/FITM1/ADAL/ZNF709/ZNF781/CALML6/CITED4/DBB1/WBP2NL/DD OST/RNF168/ZNF366/BHLHA15/PPP1R18/NLRP6/DIO3/DMBT1/DNAH6/DNAH8/DNMT3A/ABAT/DPH1/DRD4/DSG3/DTNA/ECE1/AGXT/EEF2/EGFR/EGR3/PATL2/EIF4G1/A2M/ELK 4/ANKRD23/EML1/UNC13D/DNAH12/SMIM14/ENO2/ADCK5/EPHA3/EPHB4/ESR1/ALAS1/FAH/FAT2/SPATA13/PRSS54/RNF182/PHACTR1/SP8/FGA/FGF10/FHIT/XRN2/RASA3/PP M1E/VASH1/BTBD3/TRAK1/MSRB2/ACIN1/FOXL1/FOXO2/FOXO1/EXPH5/AKR1B1/SPG20/EPB41L3/GGA3/FLNB/DIP2A/FLOT2/MLC1/TBC1D1/RHOBTB2/NUP210/SEL1L3/ATP11A/ NEDD4L/SYNE1/LARP1/PPP1R13B/PUM2/ARHGEP18/RYPB/MORC3/MAPK8IP2/TSSK2/VGLL2/MTOR/FUCA1/WDR27/SLC37A4/GABBR1/RNF144B/ZNF549/CCDC110/ST6GALNAC3/ NUTM1/GAK/SAMM50/DFNB31/ALS2CL/PNKD/SEC31B/TENM4/ACOT11/FAM169A/RAI14/RGS22/STEA2/GAS2/FBXL21/FBXO2/LCE2B/SACS/GATM/GBGT1/GAPDHS/PLEK2/SLC1 7A5/RPS6KC1/PABPC1/AKAP8L/DNAJC2/FGF22/NPTN/GJB2/AMPD2/SDCBP2/PDE7B/GLS2/VPS4A/AMPD3/DHHD/BMP10/ZNF638/GNAS/ZNF311/CRACR2B/PIGW/IZUMO1/ZNF84 4/THEM5/GPER1/EOGT/GRB10/MRPS18B/FLVCR1/ZBTB44/DNAJC15/SCG3/GSTP1/GTF2B/BRF1/TMOD4/GUCY1A3/CCDC106/NME7/PADI1/GZMA/ANXA2/HAS1/SOX8/KCNIP2/NR G1/ANXA6/HK1/HLA-B/HLA-DOA/HLA-DPA1/ANXA13/HLA-E/HLA- F/HLX/HMGA1/NR4A1/ACACB/HPCA/APBA2/HOXB3/HOXC4/HOXC5/HOXC6/HOXC7/HRH1/HSD11B1/HSD17B2/ACADL/HSPA1L/HSP90AA1/HSP90AB1/HTR3A/HTR5A/DUPD1/TFA P2E/ID3/ZC3H12D/COL28A1/FMN1/BARHL2/NME9/IGF1/IGF2/GPR142/LCE1C/LCE1D/LCE2D/IL1R1/IL1RN/IL6/AQP2/IL15RA/PRSS41/IL16/FOXK2/AQP5/IRF1/AQP9/ISL1/ITGA7/ITI H4/IVL/JUP/USP50/HILS1/ATP9B/KCNH2/KCNJ8/KDR/ACAT1/KIF25/IP05/KRT7/KRT15/INSC/TOMM20L/HES5/SLC6A17/RESP18/AFF3/STMN1/LCK/LCP1/MUC21/LDLR/ARHGDI2/L GALS9/LHCGR/LLGL1/LMNA/LMO2/RAB19/LOX/LPP/SMAD3/MC2R/MCC/ME1/ME2/MEF2D/MAP3K1/MEOX1/MEOX2/MFNG/MGAT1/MITF/LHX8/MOCS1/MOV10/MPZ/MT1A/N UDT1/MYH4/MYL2/NUBP1/NDUFB4/DRG1/NEDD9/NEU1/ATP1A2/NFATC3/NFYB/NHLH2/NMBR/NOV/NPPC/NRAS/NTF3/OAS2/WRAP73/OPRL1/OR2C1/SLC22A18/PFAH2/ATP5 B/DEF6/ANO7/PALM/ARHGEP3/PARK2/BOLA1/UTP11L/LEF1/DDX47/CHST15/PDE4C/PCYOX1/PDE7A/C11orf73/SIRT6/PDE6B/ATP8A2/GALNT7/PGAM2/PIGC/PIK3CG/PITX2/PKH1 1/PKM/PLA2G2A/PLA2G1/SPA17/PLEC/PRKAG3/PML/RIPPLY3/RIPK4/TLR9/POMC/SSH1/PON1/RIN2/POU2AF1/ZDHH13/APBB11P/FBLIM1/BNC2/MED18/PALMD/CYP2W1/RPP25 /LPCAT2/BANP/PPP1CB/HERC6/PPP1CC/PIWIL2/ELP3/ARHGEP10L/PRMT6/DNAJC17/GOLPH3L/ZNF532/PPP2R2B/FANCI/MOB1A/SLC29A3/MIS18BP1/WDR33/SMPD3/CNOT11/C HRNA9/SYBU/PEX26/LIMS2/FRMD4A/VAC14/CARKD/PARVA/PRKAR1B/TTC17/IFT122/ERMARD/LMBRD1/CSGALNACT1/CISD1/PRKD1/MYNN/BIN3/MAPK3/MAP2K2/PRKRIR/PROC /MRAP/PRMT8/HTRA1/CDC42SE1/PSMB4/PAK6/ARNTL2/RGMA/PRDM11/TRPC7/PSMD7/ACTR3B/PTGFR/PLEKHG5/TENM2/GATAD2B/ERMN/KLHL8/RDH14/METTL14/MARK4/CC AR2/PTPRE/PXN/CREBZF/FAM60A/ACTA2/RASGRF2/RFC2/TRIM27/RGS12/RIT2/EXOC4/RPA3/RPL8/RPL29/S100A4/S100A5/S100A6/BGLAP/ABHD4/MRPS14/NPAS3/C19orf33/PA RVG/NOD2/MAP1LC3B2/ARHGAP9/TRA2B/GZF1/DNAI2/SGK1/SYNDIG1L/MICAL1/CERK/VPS33A/BMP4/SLC4A1/SPATS2/ZNF649/ZG16/SLC8A1/ZSCAN18/BOK/SOX9/BPI/SRP68/S TAT2/STK3/STK10/SUPT6H/BST2/VAMP2/TAF4B/TBP/TCEA1/TCEB2/ZEB1/ACTC1/TEAD3/TERF1/TGM2/TCHH/TIMP3/TLE3/TRAPPC10/TNFAIP3/TNFRSF1A/TRAF1/TRAF5/TRPC4/T RPC6/PHLDA2/TWIST1/CCR2/UCP1/UPPP1/VARS/YWHAG/ZAP70/ZNF7/CA7/ZNF124/ZNF177/PTP4A1/MOGS/PAX8/CXCR4/FZD5/RAB7A/ERL3/CCDC86/CARD14/ESRG/BCL2L14/LST 1/CERS4/NLRX1/ZNF665/ZMYM1/CSPP1/ZC3H14/ERMP1/CALD1/FAM188A/ZNF606/ZC3H12A/RAB11FIP1/FAAP100/CEPB4/RNF39/C6orf25/COL18A1/ZNF436/CALR/COL21A1/UN C93B1/KRTAP2-1/QTTR1/SLIRP/CAPS/CAST/CAPZB/HIST1H2BM/SH3BGR3/GSG1/SCRT1/HIST1H3A/CCDC3/DYNLRB2/SLC25A18/SPATA16/KRTAP17- | 730 |
| GO:0042589 | zymogen granule membrane | 4/942   | 8/17046     | 0.00054 | 0.02649 | 0.02344 | TMED10/DMBT1/ZG16/VAMP2                                                                                                                                                                                                                                                                                                                                                                                                                                                                                                                                                                                                                                                                                                                                                                                                                                                                                                                                                                                                                                                                                                                                                                                                                                                                                                                                                                                                                                                                                                                                                                                                                                                                                                                                                                                                                                                                                                                                                                                                                                                                                                                                                                                                                                                                                                                                                                                                                                                                                                                                                                                                                                                                                                                                                                                                                                                                                                                                                                                                                                                                                                                                                                                                                                                                                                                                                                                                                                                                                                                                                                                                                                                                                                                                                                                                                                                                                                                                                                                                                                                                                                                                                            | 4   |





| All DMC, Molecular Function | Description        | GeneRatio | BgRatio     | pvalue   | p.adjust | qvalue   | geneID                                                                                                                                                                                                                                                                                                                                                                                                                                                                                                                                                                                                                                                                                                                                                                                                                                                                                                                                                                                                                                                                                                                                                                                                                                                                                                                                                                                                                                                                                                                                                                                                                                                                                                                                                                                                                                                                                                                                                                                                                                                                                                                                                                                                                                                                                                                                                                                                                                                                                                                                                                                                                                                                                                                                                                                                                                                                                                                                                                                                                                                                                                                                                                                                                                                                                                                                                                                                                                                                                                                                                                                                                                                                                                                                                                                                                                                                                                                                                                                                                                                                                                                                                                      | Count |
|-----------------------------|--------------------|-----------|-------------|----------|----------|----------|-----------------------------------------------------------------------------------------------------------------------------------------------------------------------------------------------------------------------------------------------------------------------------------------------------------------------------------------------------------------------------------------------------------------------------------------------------------------------------------------------------------------------------------------------------------------------------------------------------------------------------------------------------------------------------------------------------------------------------------------------------------------------------------------------------------------------------------------------------------------------------------------------------------------------------------------------------------------------------------------------------------------------------------------------------------------------------------------------------------------------------------------------------------------------------------------------------------------------------------------------------------------------------------------------------------------------------------------------------------------------------------------------------------------------------------------------------------------------------------------------------------------------------------------------------------------------------------------------------------------------------------------------------------------------------------------------------------------------------------------------------------------------------------------------------------------------------------------------------------------------------------------------------------------------------------------------------------------------------------------------------------------------------------------------------------------------------------------------------------------------------------------------------------------------------------------------------------------------------------------------------------------------------------------------------------------------------------------------------------------------------------------------------------------------------------------------------------------------------------------------------------------------------------------------------------------------------------------------------------------------------------------------------------------------------------------------------------------------------------------------------------------------------------------------------------------------------------------------------------------------------------------------------------------------------------------------------------------------------------------------------------------------------------------------------------------------------------------------------------------------------------------------------------------------------------------------------------------------------------------------------------------------------------------------------------------------------------------------------------------------------------------------------------------------------------------------------------------------------------------------------------------------------------------------------------------------------------------------------------------------------------------------------------------------------------------------------------------------------------------------------------------------------------------------------------------------------------------------------------------------------------------------------------------------------------------------------------------------------------------------------------------------------------------------------------------------------------------------------------------------------------------------------------------------------|-------|
| GO:0003674                  | molecular_function | 893/893   | 15274/17046 | 1.62E-44 | 1.63E-41 | 1.44E-41 | <p>AKT3/ABI1/CDH3/TANK/CD300LD/GNE/ZNF783/CDH9/TSPAN5/CDH12/CDH13/SUGP2/MBNL2/FARP1/KLRG1/RCAN2/KCNMB2/CDKN1C/SPEG/BCKDK/TCIRG1/MRVI1/TRDN/ABCA9/SPON2/C1D/COGS/ZBTB18/PITRM1/TACC2/MTHFS/DMRT2/CELF1/CELF2/TBR1/RFPL2/SEPT9/HCT/PPFRR2/ADCY3/PNRC1/TMED10/SLC27A2/RER1/ESM1/ADAM29/HNRNPUL1/RPP14/HIBADH/CHI3L1/ERLIN2/PSIP1/CHI3L2/PKP3/EGLN2/TP53TG1/PXMP4/ATXN2L/B4GALT7/KIF12/ACOT7/PDAP1/EXOC3/CHRNA1/CHRNA2/ADPRHL1/CHRNA5/CARD16/GP/RIN1/SORCS1/ZBED9/PWWP2A/CIDEA/GBP4/ALPK2/PANX3/RBP7/GALNT15/AP3S1/CLCA1/FAT3/CLN5/MRPL52/FRMD6/CCR1/SLC51B/C15orf27/ZG16B/SLC38A10/KRT40/TNFAIP8L1/MOB3A/CNP/AADAACL3/LRRIQ3/APOA1BP/NEU4/COL9A3/COL11A1/GALM/COMP/SCLT1/MAP3K8/ZFP42/ADM/IL31RA/EGFLAM/UBLCP1/OR2A14/CPD/CPM/CP51/NDUFAF6/PXDNL/CRABP1/ZNF358/TRPM6/CRYBB3/MB2/PARP4/MPP7/LDLRAD3/FAM101A/B3GLCT/MGAT5B/APCDD1/CSTA/KLC3/ZNF738/CTGF/ABCC13/SMYD1/SGOL1/PPM1L/LRRC34/SH3D19/CYB561/CYLD/MBOAT1/ADRB3/ESCO2/CYP11A1/ZNF782/FITM1/ADAL/TRPV3/ZNF709/ZNF781/CALML6/CITED4/DBB1/WBP2NL/LONRF2/DDOST/RNF168/RBM46/ZNF366/BHLHA15/COCH/PPP1R18/NLRP6/DIO3/DLG2/DMBT1/DNAH6/DNAH8/DNMT3A/ABAT/DPH1/DRD4/DSG3/DTNA/ECE1/AGXT/EEF2/EFNA2/EGFR/EGR3/PATL2/EIF4G1/A2M/ELK4/ANKRD23/LIPH/EML1/UNC13D/ZBTB7C/DNAH12/SLC10A4/ENO2/ADCK5/EPHA1/EPHA3/EPHB4/ESR1/ALAS1/F11/FAH/FAT2/SPATA13/PRSS54/FCGR2A/RNF182/PHACTR1/SP8/FGA/FGF10/FHIT/XRN2/RASA3/RNF44/PPM1E/VASH1/TRAK1/MSRB2/ACIN1/LIMCH1/FOXL1/FOXC2/TBC1D9B/FOXO1/EXPH5/AKR1B1/SPG20/NFASC/EPB413/GGA3/FLNB/DIP2A/FLOT2/MCL1/TBC1D1/RHOBTB2/NUP210/ATP11A/KLHL18/NEDD4L/SYNE1/PSD3/LARP1/PPP1R13B/PUM2/ARHGFE18/RYBP/MORC3/MAPK8IP2/TSSK2/VGLL2/MTOR/FUCA1/WDR27/TTLL10/SLC37A4/GABBR1/RASGEF1C/RNF144B/ZNF549/CCDC110/ST6GALNAC3/NUTM1/DSCR9/GAK/SAMM50/DFNB31/ALS2CL/PNKD/TENM4/ACOT11/LTN1/RGS22/STEAP2/FBXL21/FBXO2/LCE2B/SACS/GATM/GBGT1/GAPDHS/SLC17A5/ADGRF1/RPS6KC1/PABPC1/AKAP8L/GJA3/DNAJC2/FGF22/NPTN/GJB2/AMPD2/SDCBP2/PDE7B/CYTH4/GLS2/VPS4A/AMPD3/GPR162/DHHD/BMP10/ZNF638/GNAS/C11orf31/ZNF311/CRACR2B/TMPRSS12/PIGW/IZUMO1/ZNF844/THEM5/GPR26/GPER1/EOGT/DOK7/DCBLD1/FFAR2/TRIM42/GRB10/MRPS18B/FLVCR1/GRIK4/ZBTB44/DNAJC15/SCG3/GSTP1/GTF2B/BRF1/TMOD4/GUCY1A3/CCDC106/NME7/GPR132/PAD1/GZMA/ANXA2/HAS1/SERPIND1/SOX8/KCNIP2/NRG1/ANXA6/HK1/HLA-B/HLA-DOA/HLA-DPA1/ANXA13/HLA-E/HLA-F/HLX/HMGA1/NR4A1/ACACB/HPCA/APBA2/HOXB3/HOXC4/HOXC5/HOXC6/HOXD3/AGFG2/HRH1/HSD11B1/HSD17B2/ACADL/HSPA1L/HSP90AA1/HSP90AB1/HTR3A/HTR5A/DUPD1/ADAMTSL5/ANKRD45/TFAP2E/ID3/ZC3H12D/COL28A1/RSP02/FMN1/BARHL2/NME9/IGF1/IGF2/CYR61/GPR142/LCE1C/LCE1D/LCE2D/IL1R1/IL1RN/IL6/IL10RA/AQP2/IL11RA/IL12RB2/IL15RA/PRSS41/IL16/FOXK2/AQP5/INHBA/INPP5A/IRF1/AQP9/ISL1/ITGA7/ITGB2/ITGB7/ITIH3/ITIH4/IVL/JUP/CD82/USP50/HILS1/ATP9B/KCNH2/KCNJ8/KCNJ9/KCNMB1/KDR/ACAT1/KIF25/IPOS/KRT7/KRT15/C17orf82/CLEC17A/HES5/SLC6A17/CDHR4/RBM12B/AFF3/LAIR2/LAMA3/STMN1/OR2A5/LCK/LCP1/LDLR/ARHGDI2/LGALS9/LHCGR/LLGL1/C11orf87/LMNA/LMO2/RAB19/LOX/ZNF833P/LPP/LTB/LTBP1/SMAD3/MC2R/MCC/ME1/ME2/MEF2D/MAP3K1/MEOX1/MEOX2/MFI2/MFNG/MGAT1/SCGB2A1/MITF/LHX8/ASGR1/MOCS1/MOV10/MPZ/PLEKHG7/MT1A/NUDT1/MYH4/MYL2/NUBP1/NDUFB4/DRG1/NEDD9/NEU1/ATP1A2/NFATC3/NFYB/NHLH2/NMBR/NOV/NPPC/NRAS/NTF3/OAS2/RNF165/OPRL1/OR2C1/OR3A2/SLC22A18/P2RY6/PAFAH2/ATP5B/IL21R/DEF6/ANO7/PALM/ARHGFE3/PARK2/SPOCK3/BOLA1/UTP11L/LEF1/DDX47/PRR16/CHST15/ANGPT4/PDE4C/PCYOX1/PDE7A/C11orf73/SIRT6/PDE6B/ATP8A2/GALNT7/PGAM2/PI3/PIGC/PIK3CG/PITX2/PKHD1/PKM/PLA2G2A/PLAGL1/SPA17/LRP1B/PLEC/PRKAG3/PML/FXYD6/GPR84/IL20RB/SLC01C1/PNLIP/RIPK4/TLR9/TREM1/CYTL1/POMC/SSH1/PON1/RIN2/MOV10L1/POU2AF1/ZDHC13/APBB1P/ROBO4/MXRA8/FBLIM1/BORCS6/BNC2/MED18/CYP2W1/RPP25/LPCAT2/TTC12/BANP/PPP1CB/FAM118A/HERC6/PPP1CC/PIWIL2/ELP3/ARHGFE10L/PRMT6/DNAJC17/GOLPH3L/ZNF532/PPP2R2B/FANCI/MOB1A/SLC47A1/SLC29A3/MIS18BP1/WDR33/TRPV6/SMPD3/SLC30A10/CNOT11/CHRNA9/THUMP1/SYBU/PEX26/LIMS2/FRMD4A/VAC14/CARKD/PARVA/PRKAR1B/TTC17/IFT122/MCTP2/LMBRD1/CSGALNACT1/PAG1/CISD1/PRKD1/MYNN/BIN3/APOBR/MAK3/MAK2K2/PCDHG4/PCDHG7/PCDHG8/PCDHGA11/PRKRIR/PROC/MRAP/TRPV5/PRMT8/MASP1/HTRA1/SLAMF8/CDC42SE1/PSMB4/PAK6/ARNTL2/RGMA/PRDM11/TRPC7/LPAR5/PSMD7/SLURP1/ACTR3B/PTGFR/PLEKHG5/TENM2/GATAD2B/ERMN/RNF150/RDH14/METTL14/MARK4/CCAR2/PTPRE/PXN/CREBZF/AB</p> | 893   |

|            |         |         |             |          |          |          |                                                                                                                                                                                                                                                                                                                                                                                                                                                                                                                                                                                                                                                                                                                                                                                                                                                                                                                                                                                                                                                                                                                                                                                                                                                                                                                                                                                                                                                                                                                                                                                                                                                                                                                                                                                                                                                                                                                                                                                                                                                                                                                                                                                                                                                                                                                                                                                                                                                                                                                                                                                                                                                                                                                                                                                                                                                                                                                                                                                                                                                                                                                                                                                                                                                                                                                                                                                                                                                                                                                                                                                                                                                                                                                                                                                                                                                                                                                                                                                                                                                                                                                                                             |     |
|------------|---------|---------|-------------|----------|----------|----------|-------------------------------------------------------------------------------------------------------------------------------------------------------------------------------------------------------------------------------------------------------------------------------------------------------------------------------------------------------------------------------------------------------------------------------------------------------------------------------------------------------------------------------------------------------------------------------------------------------------------------------------------------------------------------------------------------------------------------------------------------------------------------------------------------------------------------------------------------------------------------------------------------------------------------------------------------------------------------------------------------------------------------------------------------------------------------------------------------------------------------------------------------------------------------------------------------------------------------------------------------------------------------------------------------------------------------------------------------------------------------------------------------------------------------------------------------------------------------------------------------------------------------------------------------------------------------------------------------------------------------------------------------------------------------------------------------------------------------------------------------------------------------------------------------------------------------------------------------------------------------------------------------------------------------------------------------------------------------------------------------------------------------------------------------------------------------------------------------------------------------------------------------------------------------------------------------------------------------------------------------------------------------------------------------------------------------------------------------------------------------------------------------------------------------------------------------------------------------------------------------------------------------------------------------------------------------------------------------------------------------------------------------------------------------------------------------------------------------------------------------------------------------------------------------------------------------------------------------------------------------------------------------------------------------------------------------------------------------------------------------------------------------------------------------------------------------------------------------------------------------------------------------------------------------------------------------------------------------------------------------------------------------------------------------------------------------------------------------------------------------------------------------------------------------------------------------------------------------------------------------------------------------------------------------------------------------------------------------------------------------------------------------------------------------------------------------------------------------------------------------------------------------------------------------------------------------------------------------------------------------------------------------------------------------------------------------------------------------------------------------------------------------------------------------------------------------------------------------------------------------------------------------------------|-----|
| GO:0005488 | binding | 774/893 | 12915/17046 | 7.46E-17 | 3.75E-14 | 3.33E-14 | <p>AKT3/ABI1/CDH3/TANK/CD300LD/GNE/ZNF783/CDH9/TSPAN5/CDH12/CDH13/SUGP2/MBNL2/FARP1/KLRG1/RCAN2/CDKN1C/SPEG/BCKDK/TCIRG1/MRVI1/TRDN/ABCA9/SPON2/C1D/COG5/ZBTB18/PITRM1/TACC2/MTHFS/DMRT2/CELF1/CELF2/TBR1/RFP2/SEPT9/HCTST/NPFFR2/ADCY3/PNRC1/TMED10/SLC27A2/RER1/ESM1/ADAM29/HNRNPUL1/RPP14/HIBADH/CHI3L1/ERLIN2/PSIP1/CHI3L2/PPK3/EGLN2/PXMP4/ATXN2L/B4GALT7/KIF12/ACOT7/PDAP1/EXOC3/CHRNA1/CHRNA2/ADPRHL1/CHRNA5/GPRIN1/SORCS1/ZBED9/PWWP2A/CIDEA/GBP4/ALPK2/RBP7/GALNT15/AP3S1/CLCA1/FAT3/CLN5/FRMD6/CCR1/SLCS1B/ZG16B/KRT40/TNFAIP8L1/MOB3A/CNP/LRRIQ3/APOA1BP/NEU4/COL11A1/GALM/COMPP/SCLT1/MAP3K8/ZFP42/ADM/IL31RA/EGFLAM/UBLCP1/CPD/CPM/CPS1/PXDNL/CRABP1/ZNF358/TRPM6/CRYBB3/MIB2/PARP4/MPP7/LDLRAD3/FAM101A/MGAT5B/APCDD1/CSA/KLC3/ZNF738/CTGF/ABCC13/SMYD1/SGOL1/PPM1L/SH3D19/CYB561/CYLD/ADRB3/ESCO2/CYP11A1/ZNF782/ADAL/ZNF709/ZNF781/CALML6/DOB1/WBP2NL/LONRF2/DDOST/RNF168/RBM46/ZNF366/BHLHA15/COCH/PPP1R18/NLRP6/DLG2/DMBT1/DNAH6/DNAH8/DNMT3A/ABAT/DPH1/DRD4/DSG3/DNAH8/ECE1/AGXT/EEF2/EFNA2/EGFR/EGR3/PATL2/EIF4G1/A2M/ELK4/ANKRD23/LIPH/EML1/UNC13D/ZBTB7C/DNAH12/ENO2/ADCK5/EPHA1/EPHA3/EPHB4/ESR1/ALAS1/F11/FAH/FAT2/SPATA13/FCGR2A/RNF182/PHACTR1/SP8/FGA/FGF10/FHIT/XRN2/RASA3/RNF44/PPM1E/VASH1/TRAK1/MSRB2/ACIN1/LIMCH1/FOXO1/FOXO2/TBC1D9B/FOXO1/EXPH5/SPG20/NFASC/EPB41L3/GGA3/FLNB/DIP2A/FLOT2/MLC1/TBC1D1/RHOBTB2/NUP210/ATP11A/KLHL18/NEDD4L/SYNE1/LARP1/PPP1R13B/PUM2/RYPB/MORC3/MAPK8IP2/TSSK2/VGLL2/MTOR/WDR27/TTL10/GABBR1/RNF144B/ZNF549/CCDC110/NUTM1/GAK/SAMM50/DFNB31/ALS2CL/PNKD/TENM4/ACOT11/LTN1/STEAP2/FBXO2/SACS/GBGT1/GAPDHS/RPS6K1/PABPC1/AKAP8L/GJA3/DNAJC2/FGF22/NPTN/AMPD2/SDCBP2/PDE7B/CYTH4/GLS2/VPS4A/AMPD3/BMP10/ZNF638/GNAS/C11orf31/ZNF311/CRACR2B/IZUMO1/ZNF844/THEM5/GPER1/DOK7/DCBLD1/FFAR2/TRIM42/GRB10/FLVCR1/ZBTB44/DNAJC15/SCG3/GSTP1/GTF2B/BRF1/TMOD4/GUCY1A3/CCDC106/NME7/PAD1/GZMA/ANXA2/SERPIND1/SOX8/KCNIP2/NRG1/ANXA6/HK1/HLA-B/HLA-DOA/HLA-DPA1/ANXA13/HLA-E/HLA-F/HLX/HMGA1/NR4A1/ACACB/HPCA/APBA2/HOXB3/HOXC4/HOXC5/HOXC6/HOXD3/AGFG2/HRH1/ACADL/HSPA1L/HSP90AA1/HSP90AB1/HTR3A/ADAMTSL5/ANKRD45/TFAP2E/D3/ZC3H12D/RPO2/FMN1/BARHL2/IGF1/IGF2/CYR61/LCE2D/IL1R1/IL1RN/IL6/IL10RA/IL12RB2/IL15RA/IL16/FOXK2/AQP5/INHBA/INPP5A/IRF1/ISL1/ITGA7/ITGB2/ITGB7/ITIH4/IVL/JUP/CD82/HILS1/ATP9B/KCNH2/KCNJ8/KCNJ9/KDR/ACAT1/KIF25/IPO5/KRT7/KRT15/C17orf82/CLEC17A/HES5/CDHR4/RBM12B/AFF3/LAIR2/LAMA3/STMN1/LCK/LCP1/LDLR/ARHGDI1/LGALS9/LHCGR/LLGL1/C11orf87/LMNA/LMO2/RAB19/LOX/ZNF833P/LPP/LTB/LTBP1/SMAD3/MC2R/MCC/ME1/ME2/MEF2D/MAP3K1/MEOX1/MEOX2/MFI2/MFNG/MGAT1/SCGB2A1/MITF/LHX8/ASGR1/MOCS1/MOV10/MT1A/NUDT1/MYH4/MYL2/NUBP1/DRG1/NEDD9/ATP1A2/NFATC3/NFYB/NHLH2/NOV/NPPC/NRAS/NTF3/OAS2/RNF165/OPRL1/SLC22A18/P2RY6/PAFAH2/ATP5B/DEF6/PALM/ARHGFE3/PARK2/SPOCK3/BOLA1/UTP11L/LEF1/DDX47/PRR16/CHST15/ANGPT4/PDE4C/PDE7A/C11orf73/SIRT6/PDE6B/ATP8A2/GALNT7/PGAM2/PIK3CG/PITX2/PKHD1/PKM/PLA2G2A/PLAGL1/SPA17/LRP1B/PLEC/PRKAG3/PML/FXYD6/IL20RB/PNLIP/RIPK4/TLR9/TREM1/CYTL1/POMC/SSH1/PON1/MOV10L1/POU2AF1/ZDHHC13/APBB1P/FBLIM1/BORCS6/BNC2/MED18/CYP2W1/RPP25/LPCAT2/TTC12/BANP/PPP1CB/FAM118A/PPP1CC/PIWIL2/ELP3/PRMT6/DNAJC17/GOLPH3L/ZNF532/PPP2R2B/FANCI/MOB1A/MIS18BP1/WDR33/TRPV6/SMPD3/CNOT11/CHRNA9/THUMP1/SYBU/PEX26/LIMS2/FRMD4A/VAC14/CARKD/PARVA/PRKAR1B/TTC17/IFT122/MCTP2/LMBRD1/CSGALNACT1/PAG1/CISD1/PRKD1/MYNN/BIN3/MAPK3/MAP2K2/PCDHGC4/PCDHGB7/PCDHGB3/PCDHGA11/PRKRIR/PROC/MRAP/TRPV5/PRMT8/MASP1/HTRA1/PSMB4/PAK6/ARNTL2/RGMA/TRPC7/PSMD7/SLURP1/ACTR3B/TENM2/GATAD2B/ERMN/RNF150/METTL4/MARK4/CCAR2/PTPRE/PXN/CREBZF/FAM60A/ACTA2/RASGRF2/RFC2/TRIM27/RGR/RIT2/EXOC4/RPA3/RPL8/RPL29/S100A4/S100A5/S100A6/BGLAP/SCT/CCL11/CCL17/MRPS14/NPAS3/PARVG/NOD2/TINAGL1/SFRP2/CXCR5/ARHGAP9/TRA2B/GZF1/DNAI2/SGK1/MICAL1/CERK/PCDH20/VPS33A/BMP4/SLC4A1/SPATS2/ZNF649/ZG16/SLC6A12/SLC8A1/SLC9A3/BMPR1B/SLIT1/BRD9/ZSCAN18/BOK/SOX9/BPI/SRP68/STAT2/STK3/STK10/SUPT6H/BST2/VAMP2/TAF4B/TBP/TCEA1/TCEB2/ZEB1/ACTC1/TEAD3/TERF1/TGM2/TCHH/TIMP3/TLE3/TLR5/TRAPPC10/TNFAIP3/TNFRSF1A/TNXB/TRA11/TRA5/TRPC4/TRPC6/TWIST1/CCR2/VARS/ZNHIT2/WNT10B/YWHAG/ZAP70/ZNF7/CA7/ZNF124/ZNF177/CACNA1E/CACNB2/PAX8/CXCR4/FZD5/RAB7A/ER13/REEP5/CCDC86/CARD14/GDPD3/BCL2L14/</p> | 774 |
|------------|---------|---------|-------------|----------|----------|----------|-------------------------------------------------------------------------------------------------------------------------------------------------------------------------------------------------------------------------------------------------------------------------------------------------------------------------------------------------------------------------------------------------------------------------------------------------------------------------------------------------------------------------------------------------------------------------------------------------------------------------------------------------------------------------------------------------------------------------------------------------------------------------------------------------------------------------------------------------------------------------------------------------------------------------------------------------------------------------------------------------------------------------------------------------------------------------------------------------------------------------------------------------------------------------------------------------------------------------------------------------------------------------------------------------------------------------------------------------------------------------------------------------------------------------------------------------------------------------------------------------------------------------------------------------------------------------------------------------------------------------------------------------------------------------------------------------------------------------------------------------------------------------------------------------------------------------------------------------------------------------------------------------------------------------------------------------------------------------------------------------------------------------------------------------------------------------------------------------------------------------------------------------------------------------------------------------------------------------------------------------------------------------------------------------------------------------------------------------------------------------------------------------------------------------------------------------------------------------------------------------------------------------------------------------------------------------------------------------------------------------------------------------------------------------------------------------------------------------------------------------------------------------------------------------------------------------------------------------------------------------------------------------------------------------------------------------------------------------------------------------------------------------------------------------------------------------------------------------------------------------------------------------------------------------------------------------------------------------------------------------------------------------------------------------------------------------------------------------------------------------------------------------------------------------------------------------------------------------------------------------------------------------------------------------------------------------------------------------------------------------------------------------------------------------------------------------------------------------------------------------------------------------------------------------------------------------------------------------------------------------------------------------------------------------------------------------------------------------------------------------------------------------------------------------------------------------------------------------------------------------------------------------------------|-----|

|            |                 |         |            |          |          |          |                                                                                                                                                                                                                                                                                                                                                                                                                                                                                                                                                                                                                                                                                                                                                                                                                                                                                                                                                                                                                                                                                                                                                                                                                                                                                                                                                                                                                                                                                                                                                                                                                                                                                                                                                                                                                                                                                                                                                                                                                                                                                                                                                                                                                                                                                                                                                                                                                                                                                                                                                                                                                                                                                                                                                                                                                                                                                                                                                                                                                                                                                                                                                                                                                                                                                                                                                                                                                                                                                                                                                                                                                                                                                                                                                                                                                                 |     |
|------------|-----------------|---------|------------|----------|----------|----------|---------------------------------------------------------------------------------------------------------------------------------------------------------------------------------------------------------------------------------------------------------------------------------------------------------------------------------------------------------------------------------------------------------------------------------------------------------------------------------------------------------------------------------------------------------------------------------------------------------------------------------------------------------------------------------------------------------------------------------------------------------------------------------------------------------------------------------------------------------------------------------------------------------------------------------------------------------------------------------------------------------------------------------------------------------------------------------------------------------------------------------------------------------------------------------------------------------------------------------------------------------------------------------------------------------------------------------------------------------------------------------------------------------------------------------------------------------------------------------------------------------------------------------------------------------------------------------------------------------------------------------------------------------------------------------------------------------------------------------------------------------------------------------------------------------------------------------------------------------------------------------------------------------------------------------------------------------------------------------------------------------------------------------------------------------------------------------------------------------------------------------------------------------------------------------------------------------------------------------------------------------------------------------------------------------------------------------------------------------------------------------------------------------------------------------------------------------------------------------------------------------------------------------------------------------------------------------------------------------------------------------------------------------------------------------------------------------------------------------------------------------------------------------------------------------------------------------------------------------------------------------------------------------------------------------------------------------------------------------------------------------------------------------------------------------------------------------------------------------------------------------------------------------------------------------------------------------------------------------------------------------------------------------------------------------------------------------------------------------------------------------------------------------------------------------------------------------------------------------------------------------------------------------------------------------------------------------------------------------------------------------------------------------------------------------------------------------------------------------------------------------------------------------------------------------------------------------|-----|
| GO:0005515 | protein binding | 594/893 | 9755/17046 | 3.42E-09 | 1.15E-06 | 1.02E-06 | <p>AKT3/ABI1/TANK/CD300LD/GNE/ZNF783/TSPAN5/CDH13/FARP1/KLRG1/CDKN1C/SPERG/BCKDK/TCIRG1/MRVI1/TRDN/SPON2/C1D/COG5/ZBTB18/TACC2/DMRT2/CELFI1/SEPT9/H CST/NPFFR2/ADCY3/PNRC1/TMED10/SLC27A2/RER1/ESM1/HNRPUL1/ERLIN2/PSIP1/PKP3/EGLN2/PXMP4/ATXN2L/B4GALT7/KIF12/ACOT7/EXOC3/CHRNA5/GPRIN1/SORCS1/P WWP2A/CIDEA/RBP7/AP351/CLN5/FRMD6/CCR1/SLC51B/KRT40/TNFAIP8L1/LRRIQ3/APOA1BP/NEU4/COL11A1/COMP/SCLT1/MAP3K8/ADM/IL31RA/UBLCP1/CP51/CRABP1/TRP M6/CRYBB3/MIB2/PARP4/MPP7/FAM101A/MGAT5B/APCDD1/CSTA/KLC3/CTGF/SMYD1/SGOL1/SH3D19/CYB561/CYLD/ADRB3/DDB1/WBP2NL/DDOST/RNF168/ZNF366/BHLHA1 5/COCH/PPP1R18/DLG2/DMBT1/DNMT3A/ABAT/DPH1/DRD4/DTNA/ECE1/AGXT/EEF2/EFNA2/EGFR/PATL2/EIF4G1/A2M/ELK4/ANKRD23/EML1/UNC13D/ADCK5/EPHA1/EPHA3/E PHB4/ESR1/ALAS1/F11/FAH/SPATA13/FCGR2A/RNF182/PHACTR1/FGA/FGF10/FHIT/PPM1E/VASH1/TRAK1/MSRB2/ACIN1/LIMCH1/FOX2/TBC1D9B/FOXO1/EXPH5/SPG20/NFASC /EPB41L3/GGA3/FLNB/DIP2A/FLOT2/MCL1/TBC1D1/NUP210/ATP11A/KLHL18/NEDD4L/SYNE1/LARP1/PPP1R13B/PUM2/RYPB/MAPK8IP2/TSSK2/VGLL2/MTOR/WDR27/TTL10/G ABBR1/RNF144B/CCDC110/NUTM1/GAK/SAMM50/DFNB31/ALS2CL/PNKD/TENM4/LTN1/FBXO2/SACS/GAPDH5/RPS6KC1/PABPC1/AKAP8L/GJA3/DNAJC2/FGF22/NPTN/AMPD2/S DCBP2/GLS2/VPS4A/BMP10/GNAS/CRACR2B/IZUMO1/ZNF844/THEM5/GPER1/DOK7/FFAR2/TRIM42/GRB10/FLVCR1/ZBTB44/DNAJC15/GSTP1/GTF2B/BRF1/TMOD4/GUCY1A3/C CDC106/NME7/GZMA/ANXA2/SOX8/KCNIP2/NRG1/ANXA6/HK1/HLA-B/HLA-DOA/HLA-E/HLA-</p> <p>F/HLX/HMGA1/NR4A1/ACACB/HPCA/APBA2/HOXC4/HOXD3/HSPA11/HSP90AA1/HSP90AB1/ADAMTSL5/ANKRD45/TFAP2E/ID3/RSPO2/FMN1/BARHL2/IGF1/IGF2/CYR61/LCE2D/IL 1R1/IL1RN/IL6/IL10RA/IL12RB2/IL15RA/IL16/FOXK2/AQP5/INHBA/INPP5A/IRF1/ISL1/ITGA7/ITGB7/ITIH4/IVL/JUP/CD82/HILS1/KCNH2/KCNJ8/KCNJ9/KDR/ACAT1/KIF25/IPO 5/KRT7/KRT15/C17orf82/HESS/RBM12B/LAIR2/LAMA3/STMN1/LCK/LCP1/LDLR/ARHGDI2/LGALS9/LGL1/C11orf87/LMNA/LMO2/LOX/LPP/LTB/LTBP1/SMAD3/MC2R/MCC/MEF2 D/MAP3K1/MEOX1/MEOX2/MFI2/SCGB2A1/MITF/LHX8/ASGR1/MOV10/MT1A/NUDT1/MYH4/MYL2/NUBP1/DRG1/NEDD9/ATP1A2/NFATC3/NFYB/NHLH2/NOV/NPPC/NRAS/NTF 3/OAS2/OPRL1/SLC22A18/P2RY6/ATP5B/DEF6/PALM/ARHGEF3/PARK2/BOLA1/UTP11L/LEF1/DDX47/PRR16/ANGPT4/PDE4C/C11orf73/SIRT6/PIK3CG/PITX2/PKHD1/PKM/SPA17/ PLEC/PRKAG3/PML/FXYD6/IL20RB/RIPK4/TLR9/TREM1/CYTL1/POMC/SSH1/PONI/POU2AF1/APBB1P/FBLIM1/BORCS6/MED18/RPP25/TTC12/BANP/PPP1CB/FAM118A/PPP1CC/E LP3/PRMT6/GOLPH3L/PPP2R2B/FANCI/MOB1A/MIS18BP1/TRPV6/CNOT11/SYBU/PEX26/LIMS2/FRMD4A/VAC14/CARKD/PARVA/PRKAR1B/TTC17/IFT122/LMBRD1/PAG1/PRKD1/ BIN3/MAPK3/MAP2K2/PRKRIR/PROC/MRAP/TRPV5/PRMT8/MASBP1/HTRA1/PSMB4/PAK6/ARNTL2/RGMA/TRPC7/PSMD7/SLURP1/ACTR3B/TENM2/GATAD2B/ERMM/MARKA/CCA R2/PTPRE/PXN/CREBZF/FAM60A/ACTA2/RASGRF2/RFC2/TRIM27/RGR/RIT2/EXOC4/RPA3/S100A4/S100A5/S100A6/SCT/CCL11/CCL17/NPAS3/PARVG/NOD2/TINAGL1/SFRP2/CXC R5/ARHGAP9/TRA2B/DNAI2/SGK1/MICAL1/CERK/VPS33A/BMP4/SLC4A1/ZNF649/ZG16/SLC6A12/SLC8A1/SLC9A3/BMPR1B/SLIT1/BRD9/BOK/SOX9/STAT2/STK3/STK10/SUPT6H/B ST2/VAMP2/TAFA4B/TBP/TCEA1/TCEB2/ZEB1/ACTC1/TEAD3/TERF1/TGM2/TCHH/TIMP3/TLE3/TLR5/TRAPPC10/TNFAIP3/TNFRSF1A/TNXB/TRA1/TRA5/TRPC4/TRPC6/TWIST1/CC R2/VARS/WNT10B/YWHAG/ZAP70/ZNF124/ZNF177/CACNB2/PAX8/CXCR4/FZD5/RAB7A/REEP5/CCDC86/CARD14/BCL2L14/NLRX1/IGFLR1/ZMYM1/CSPP1/ZC3H14/CALD1/FAM18 8A/ZC3H12A/RAB11FIP1/FAAP100/CPEB4/COL18A1/ZNF436/CALR/SLIRP/COLQ/CAST/CAPZB/HIST1H2BM/SH3BGL3/GSG1/HIST1H3A/SLC25A18/ANTXR1/SLA2/BFSP2/YIPF4/ZNF 397/NROB2/HOPX/PARD6G/PARD6B/IL1F10/SPINK7/RETNLB/TRIM63/KDM2B/LOXL3/GTBPB3/MGAR/PCX2/RAE1/IFITM1/GAS7/SCIN/CDK10/RUNX1/TP63/RUNX3/IRS2/ACTN1/ CRADD/FADD/TNFRSF11A/SYNJ2/SPHK1/BUD31/CCNA1/ENDOU/SKAP2/STBD1/LIMD1/THAP3/CCR2/MAP7/PRC1/STARD13/PIAS2/SYT7/LDB2/SLC16A3/CBFA2T2/RSAD2/AURKB/ DAPL1/RCS1/IL32/CD8A/REEP6/TRIP10/ADIPOQ/ARHGAP29/RAB3D/H2AFY/ENTPD3/ARHGEF10/MICAL2/N4BP1/VGLL4/RAPGEF2/ULK2/USP6NL/CD79A/DAZAP2/TELO2/RABGA P1L/TMCC2/FGF19/NR1H4</p> | 594 |
| GO:0043169 | cation binding  | 264/893 | 3856/17046 | 4.55E-07 | 0.00011  | 0.0001   | <p>CDH3/TANK/GNE/CDH9/CDH12/CDH13/MBNL2/SPON2/ZBTB18/PITRM1/MTHFS/DMRT2/RFPL2/ADCY3/ADAM29/EGLN2/B4GALT7/CHRNA1/CHRNA2/ADPHL1/CHRNA5/GALNT1 5/CLCA1/FAT3/MOB3A/APOA1BP/COL11A1/COMP/MAP3K8/ZFP42/CPD/CPM/CP51/PXDNL/ZNF358/TRPM6/MIB2/MGAT5B/SMYD1/PPM1L/CYB561/CYLD/ESCO2/CYP11A1/ZNF7 82/ADAL/ZNF709/ZNF781/CALML6/LONRF2/RNF168/ZNF366/DNMT3A/ABAT/DRD4/DSG3/DTNA/ECE1/EGR3/EML1/ZBTB7C/ENO2/ESR1/FAH/FAT2/RNF182/SP8/XRN2/RASA3/R NF44/PPM1E/MSRB2/LIMCH1/TBC1D9B/ATP11A/RYPB/MORC3/TSSK2/RNF144B/ZNF549/PNKD/LTN1/STEAP2/GBGT1/AKAP8L/AMPD2/PDE7B/AMPD3/ZNF638/GNAS/ZNF311/CR ACR2B/ZNF844/TRIM42/ZBTB44/GTF2B/BRF1/NME7/PADI1/ANXA2/KCNIP2/ANXA6/ANXA13/NR4A1/ACACB/HPCA/AGFG2/HRH1/HTR3A/ADAMTSL5/ZC3H12D/FOXK2/ISL1/ITGA7 /ITGB2/ITGB7/ATP9B/ACAT1/CLEC17A/CDHR4/LCP1/LDLR/LMO2/LOX/ZNF833P/LPP/LTBP1/SMAD3/ME1/ME2/MAP3K1/MFI2/MFNG/MGAT1/LHX8/ASGR1/MOCS1/MT1A/NUDT 1/MYL2/NUBP1/ATP1A2/OAS2/RNF165/PARK2/SPOCK3/PDE4C/PDE7A/SIRT6/PDE6B/ATP8A2/GALNT7/PKM/PLA2G2A/PLAGL1/LRP1B/PML/PNLP/PON1/MOV10L1/ZDHHC13/FBL IM1/BNC2/CYP2W1/LPCAT2/PPP1CB/PPP1CC/ELP3/ZNF532/MOB1A/SMPD3/CHRNA9/LIMS2/MCTP2/CSGALNACT1/CISD1/PRKD1/MYNN/PCDHGC4/PCDHGB7/PCDHGB3/PCDHGA 11/PRKRIR/PROC/MASP1/GATAD2B/RNF150/PXN/TRIM27/S100A4/S100A5/S100A6/BGLAP/GZF1/MICAL1/CERK/PCDH20/ZNF649/SLC8A1/BMPR1B/SLIT1/ZSCAN18/STK3/TCEA1/ ZEB1/TGM2/TCHH/TIMP3/TNFAIP3/TRA1/TRA5/ZNHIT2/ZNF7/CA7/ZNF124/ZNF177/CACNA1E/ER13/GDPD3/ZNF665/ZMYM1/ZC3H14/ERMP1/ZNF606/ZC3H12A/RNF39/COL18 A1/ZNF436/CALR/QTRT1/CAPS/SCRT1/ANTXR1/ATP13A4/ZNF397/CASQ1/TRIM63/KDM2B/LOXL3/SCIN/RUNX1/TP63/ACTN1/TNFRSF11A/SPHK1/ENDOU/LIMD1/CH25H/THAP3/E R1/PIAS2/ZFAND2A/MAP3K6/SYT7/CBFA2T2/RSAD2/AURKB/NEURL3/ARHGAP29/MTL5/MICAL2/RAPGEF2/ZBTB39/NR1H4</p>                                                                                                                                                                                                                                                                                                                                                                                                                                                                                                                                                                                                                                                                                                                                                                                                                                                                                                                                                                                                                                                                                                                                                                                                                                                                                                                                                                                                                                                                                                                                                                                                                                                                                                                                                                                                                                                                                                                                                                                                                                                                                                       | 264 |

|            |                               |         |            |          |         |         |                                                                                                                                                                                                                                                                                                                                                                                                                                                                                                                                                                                                                                                                                                                                                                                                                                                                                                                                                                                                                                                                                                                                                                                                                                                                                                                                                                                                                                                                                                                                                                                                                                                                                                                                                                                                                                                                                                                                                                                                                                                                                                                                                                                                                                                                                                                          |     |
|------------|-------------------------------|---------|------------|----------|---------|---------|--------------------------------------------------------------------------------------------------------------------------------------------------------------------------------------------------------------------------------------------------------------------------------------------------------------------------------------------------------------------------------------------------------------------------------------------------------------------------------------------------------------------------------------------------------------------------------------------------------------------------------------------------------------------------------------------------------------------------------------------------------------------------------------------------------------------------------------------------------------------------------------------------------------------------------------------------------------------------------------------------------------------------------------------------------------------------------------------------------------------------------------------------------------------------------------------------------------------------------------------------------------------------------------------------------------------------------------------------------------------------------------------------------------------------------------------------------------------------------------------------------------------------------------------------------------------------------------------------------------------------------------------------------------------------------------------------------------------------------------------------------------------------------------------------------------------------------------------------------------------------------------------------------------------------------------------------------------------------------------------------------------------------------------------------------------------------------------------------------------------------------------------------------------------------------------------------------------------------------------------------------------------------------------------------------------------------|-----|
| GO:0043167 | ion binding                   | 362/893 | 5637/17046 | 9.40E-07 | 0.00019 | 0.00017 | AKT3/CDH3/TANK/GNE/CDH9/CDH12/CDH13/MBNL2/SPEG/BCKDK/ABCA9/SPON2/ZBTB18/PITRM1/MTHFS/DMRT2/RFPL2/SEPT9/ADCY3/SLC27A2/ADAM29/EGLN2/B4GALT7/KIF12/ACOT7/CHRNA1/CHRNA2/ADPRHL1/CHRNA5/GBPA/ALPK2/GALNT15/CLCA1/FAT3/MOB3A/APOA1BP/COL11A1/COMP/MAP3K8/ZFP42/CPD/CPM/CP51/PXDNL/CRABP1/ZNF358/TRPM6/MIB2/MGAT5B/CTGF/ABCC13/SMYD1/PPM1L/CYB561/CYLD/ESCO2/CYP11A1/ZNF782/ADAL/ZNF709/ZNF781/CALML6/LONRF2/RNF168/ZNF366/NLRP6/DNAH6/DNAH8/DNMT3A/ABAT/DRD4/DSG3/DTNA/ECE1/AGXT/EEF2/EGFR/EGR3/LIPH/EML1/ZBTB7C/DNAH12/ENO2/EPHA1/EPHA3/EPHB4/ESR1/ALAS1/F11/FAH/FAT2/RNF182/SP8/FGF10/XRN2/RASA3/RNF44/PPM1E/MSRB2/LIMCH1/TBC1D9B/RHO8TB2/ATP11A/RYPB/MORC3/TSSK2/MTOR/TLL10/RNF144B/ZNF549/GAK/PNKD/LTN1/STEAP2/GBGT1/RPS6KC1/AKAP8L/AMPD2/PDE7B/VPS4A/AMPD3/ZNF638/GNAS/ZNF311/CRACR2B/ZNF844/TRIM42/ZBTB44/GTF2B/BRF1/GUCY1A3/NME7/PADI1/ANXA2/SERPIND1/KCNIP2/ANXA6/HK1/A/ANXA13/NR4A1/ACACB/HPCA/AGFG2/HRH1/ACADL/HSPA1L/HSP90AA1/HSP90AB1/HTR3A/ADAMTSL5/ZC3H12D/RSPO2/CYR61/FOXK2/ISL1/ITGA7/ITGB2/ITGB7/ATP9B/KCNJ8/KD/R/ACAT1/KIF25/CLEC17A/CDHR4/LCK/LCP1/LDLR/LMO2/RAB19/LOX/ZNF833P/LPP/LTBP1/SMAD3/ME1/ME2/MAP3K1/MF12/MFNG/MGAT1/LHX8/ASGR1/MOCS1/MOV10/MF11A/NUDT1/MYH4/MYL2/NUBP1/DRG1/ATP1A2/NOV/NRAS/OAS2/RNF165/PAFAH2/ATP5B/PARK2/SPOCK3/DDX47/CHST15/PDE4C/PDE7A/SIRT6/PDE6B/ATP8A2/GALNT7/PIK3CG/PKM/PLA2G2A/PLAGL1/LRP1B/PRKAG3/PML/PNLIP/RIPK4/PON1/MOV10L1/ZDHHC13/FBLIM1/BNC2/CYP2W1/LPCAT2/PPP1CB/PPP1CC/ELP3/GOLPH3L/ZNF532/MOB1A/SMPD3/CHRNA9/LIMS2/CARKD/PRKAR1B/MCTP2/CSGALNACT1/CISD1/PRKD1/MYNN/MAPK3/MAP2K2/PCDHGC4/PCDHGB7/PCDHGB3/PCDHGA11/PRKRIR/PROC/MASP1/PAK6/TRPC7/ACTR3B/GATAD2B/RNF150/MARK4/PXN/ACTA2/RFC2/TRIM27/RIT2/RPL29/S100A4/S100A5/S100A6/BGLAP/NOD2/ARHGAP9/GZF1/SGR1/MICAL1/CERK/PCDH20/BMP4/SLIT1/C8A1/BMPR1B/SLIT1/ZSCAN18/STK3/STK10/VAMP2/TCEA1/ZEB1/ACTC1/TGM2/TCHH/TIMP3/TNFaip3/TNXB/TRAFF1/TRAFF5/TRPC4/TRPC6/VARS/ZNHIT2/ZAP70/ZNF7/CA7/ZNF124/ZNF177/CACNA1E/RAB7A/ER13/GDPD3/NLRX1/ZNF665/ZMYM1/ZC3H14/ERMPP1/ZNF606/ZC3H12A/RNF39/C6orf25/COL18A1/ZNF436/CALR/QTRT1/CAPS/SCRT1/ANTXR1/ATP13A4/ZNF397/CASQ1/TTBK1/TRIM63/KDM2B/LOXL3/GTPBP3/SCIN/CDK10/KMO/RUNX1/TP63/RUNX3/ACTN1/TNFRSF11A/SPHK1/ENDOU/LIMD1/CH25H/THAP3/ER1/PIAS2/ZFAND2A/MAP3K6/SYT7/CBFA2T2/RSAD2/AURKB/NEURL3/ADIPOQ/ARHGAP29/RAB3D/ENTPD3/RAB36/MTL5/MICAL2/RAPGEF2/ULK2/ZBTB39/NR1H4 | 362 |
| GO:0046872 | metal ion binding             | 257/893 | 3777/17046 | 1.19E-06 | 0.0002  | 0.00018 | CDH3/TANK/GNE/CDH9/CDH12/CDH13/MBNL2/SPON2/ZBTB18/PITRM1/MTHFS/DMRT2/RFPL2/ADCY3/ADAM29/EGLN2/B4GALT7/ADPRHL1/GALNT15/CLCA1/FAT3/MOB3A/APOA1BP/COL11A1/COMP/MAP3K8/ZFP42/CPD/CPM/CP51/PXDNL/ZNF358/TRPM6/MIB2/MGAT5B/SMYD1/PPM1L/CYB561/CYLD/ESCO2/CYP11A1/ZNF782/ADAL/ZNF709/ZNF781/CALML6/LONRF2/RNF168/ZNF366/DNMT3A/ABAT/DSG3/DTNA/ECE1/EGR3/EML1/ZBTB7C/ENO2/ESR1/FAH/FAT2/RNF182/SP8/XRN2/RASA3/RNF44/PPM1E/MSRB2/LIMCH1/TBC1D9B/ATP11A/RYPB/MORC3/TSSK2/RNF144B/ZNF549/PNKD/LTN1/STEAP2/GBGT1/AKAP8L/AMPD2/PDE7B/AMPD3/ZNF638/GNAS/ZNF311/CRACR2B/ZNF844/TRIM42/ZBTB44/GTF2B/BRF1/NME7/PADI1/ANXA2/KCNIP2/ANXA6/ANXA13/NR4A1/ACACB/HPCA/AGFG2/ADAMTSL5/ZC3H12D/FOXK2/ISL1/ITGA7/ITGB2/ITGB7/ATP9B/ACAT1/CLEC17A/CDHR4/LCP1/LDLR/LMO2/LOX/ZNF833P/LPP/LTBP1/SMAD3/ME1/ME2/MAP3K1/MF12/MFNG/MGAT1/LHX8/ASGR1/MOCS1/MT1A/NUDT1/MYL2/NUBP1/ATP1A2/OAS2/RNF165/PARK2/SPOCK3/PDE4C/PDE7A/SIRT6/PDE6B/ATP8A2/GALNT7/PKM/PLA2G2A/PLAGL1/LRP1B/PML/PNLIP/PON1/MOV10L1/ZDHHC13/FBLIM1/BNC2/CYP2W1/LPCAT2/PPP1CB/PPP1CC/ELP3/ZNF532/MOB1A/SMPD3/LIMS2/MCTP2/CSGALNACT1/CISD1/PRKD1/MYNN/PCDHGC4/PCDHGB7/PCDHGB3/PCDHGA11/PRKRIR/PROC/MASP1/PAK6/TRPC7/ACTR3B/GATAD2B/RNF150/MARK4/PXN/ACTA2/RFC2/TRIM27/RIT2/RPL29/S100A4/S100A5/S100A6/BGLAP/NOD2/ARHGAP9/GZF1/SGR1/MICAL1/CERK/PCDH20/BMP4/SLIT1/C8A1/BMPR1B/SLIT1/ZSCAN18/STK3/STK10/VAMP2/TCEA1/ZEB1/ACTC1/TGM2/TCHH/TIMP3/TNFaip3/TRAFF1/TRAFF5/ZNHIT2/ZNF7/CA7/ZNF124/ZNF177/CACNA1E/ER13/GDPD3/ZNF665/ZMYM1/ZC3H14/ERMPP1/ZNF606/ZC3H12A/RNF39/COL18A1/ZNF436/CALR/QTRT1/CAPS/SCRT1/ANTXR1/ATP13A4/ZNF397/CASQ1/TRIM63/KDM2B/LOXL3/SCIN/RUNX1/TP63/ACTN1/TNFRSF11A/SPHK1/ENDOU/LIMD1/CH25H/THAP3/ER1/PIAS2/ZFAND2A/MAP3K6/SYT7/CBFA2T2/RSAD2/AURKB/NEURL3/ARHGAP29/MTL5/MICAL2/RAPGEF2/ZBTB39/NR1H4                                                                                                                                                                                                                                                                                                                                                                                                                                                                                                                                                                   | 257 |
| GO:0005102 | receptor binding              | 100/893 | 1310/17046 | 7.80E-05 | 0.01121 | 0.00994 | TRDN/C1D/TACC2/HGST/NPFFR2/SLC27A2/RER1/ESM1/ADM/CTGF/ADRB3/ZNF366/DLG2/AGXT/EFNA2/A2M/FGA/FGF10/TRAK1/FLOT2/FGF22/NPTN/BMP10/GNAS/IZUMO1/DOCK7/GRB10/GTF2B/NRG1/HLA-B/HLA-E/HLA-F/HMGA1/HSP90AB1/RSPO2/IGF1/IGF2/CYR61/IL1R1/IL1RN/IL6/IL16/INHBA/ISL1/KCNJ8/KDR/LAMA3/LCK/LTB/SMAD3/NOV/NPPC/NTF3/ATP5B/PALM/PARK2/LEF1/ANGPT4/PIK3CG/TLR9/CYTL1/POMC/LMBRD1/MRAP/RGMA/SLURP1/TENM2/PXN/S100A4/SCT/CCL11/CCL17/SFRP2/BMP4/SLIT1/TLR5/TNXB/TRAFF1/CCR2/WNT10B/YWHAG/ZAP70/CALR/SH3BGLR3/NR0B2/IL1F10/RETNLB/IRS2/ACTN1/FADD/ENDOU/CCR2/MAP7/PIAS2/IL32/CD8A/ADIPOQ/RAPGEF2/FGF19/NR1H4                                                                                                                                                                                                                                                                                                                                                                                                                                                                                                                                                                                                                                                                                                                                                                                                                                                                                                                                                                                                                                                                                                                                                                                                                                                                                                                                                                                                                                                                                                                                                                                                                                                                                                                                  | 100 |
| GO:0060089 | molecular transducer activity | 119/893 | 1631/17046 | 0.00011  | 0.01382 | 0.01225 | KLRG1/NPFFR2/CHRNA1/CHRNA2/CHRNA5/SORCS1/CCR1/MAP3K8/IL131RA/OR2A14/MIB2/ADRB3/NLRP6/DMBT1/DRD4/EGFR/EPHA1/EPHA3/EPHB4/ESR1/GABBR1/ADGRF1/NP11A/GPR162/GNAS/GPR26/GPER1/FFAR2/GRIK4/GUCY1A3/GPR132/HLA-DOA/HLA-DPA1/NR4A1/HRH1/HTR3A/HTR5A/GPR142/IL1R1/IL10RA/IL11RA/IL12RB2/IL15RA/ITGB2/ITGB7/JUP/KCNH2/KDR/STMN1/OR2A5/LDLR/LGALS9/LHCGR/LTBP1/SMAD3/MC2R/MCC/MAP3K1/ASGR1/NMBR/OPRL1/OR2C1/OR3A2/P2RY6/IL21R/LEF1/PKH1/LRP1B/GPR84/IL20RB/TLR9/TREM1/ZDHHC13/ROBO4/CHRNA9/VAC14/APOBR/MAPK3/SLAMF8/RGMA/LPAR5/PTGFR/PLEKHG5/PTPRE/TRIM27/RGR/RGS12/TINAGL1/CXCR5/SLC20A2/BMPR1B/STAT2/STK3/STK10/BST2/TNFRSF1A/TRAFF5/CCR2/TNFRSF4/PAX8/CXCR4/FZD5/GPR157/ANTXR1/NR0B2/TRIM63/LOXL3/IFITM1/IRS2/TNFRSF11A/SPHK1/ENDOU/SLAMF9/CCR2/MAP3K6/CD8A/RAPGEF2/CD79A/NR1H4                                                                                                                                                                                                                                                                                                                                                                                                                                                                                                                                                                                                                                                                                                                                                                                                                                                                                                                                                                                                                                                                                                                                                                                                                                                                                                                                                                                                                                                                                                                                                   | 119 |
| GO:0004896 | cytokine receptor activity    | 13/893  | 80/17046   | 0.00025  | 0.02766 | 0.02452 | CCR1/IL131RA/IL1R1/IL10RA/IL11RA/IL12RB2/IL15RA/IL21R/IL20RB/CXCR5/CCR2/CXCR4/CCR2                                                                                                                                                                                                                                                                                                                                                                                                                                                                                                                                                                                                                                                                                                                                                                                                                                                                                                                                                                                                                                                                                                                                                                                                                                                                                                                                                                                                                                                                                                                                                                                                                                                                                                                                                                                                                                                                                                                                                                                                                                                                                                                                                                                                                                       | 13  |
| GO:0008092 | cytoskeletal protein binding  | 62/893  | 761/17046  | 0.00036  | 0.03482 | 0.03086 | ABI1/FARP1/KIF12/MIB2/FAM101A/KLC3/PPP1R18/EGFR/ANKRD23/EML1/PHACTR1/MSRB2/LIMCH1/EPB41L3/FLNB/SYNE1/MAPK8IP2/BMP10/TMOD4/ANXA2/HPCA/FMN1/KIF25/STMN1/LCP1/MYH4/MYL2/PARK2/PLEC/SSH1/FBLIM1/SYBU/PARVA/BIN3/ACTR3B/ERMN/MARK4/PXN/S100A4/S100A6/PARVG/NOD2/MICAL1/SLC4A1/SLC8A1/VAMP2/ACTC1/TERF1/CXCR4/CALD1/CAP2B/ANTXR1/TRIM63/RAE1/GAS7/SCIN/ACTN1/PRC1/RCS1/RAB3D/ARHGAP10/MICAL2                                                                                                                                                                                                                                                                                                                                                                                                                                                                                                                                                                                                                                                                                                                                                                                                                                                                                                                                                                                                                                                                                                                                                                                                                                                                                                                                                                                                                                                                                                                                                                                                                                                                                                                                                                                                                                                                                                                                   | 62  |
| GO:0003779 | actin binding                 | 35/893  | 363/17046  | 0.00038  | 0.03482 | 0.03086 | MIB2/PPP1R18/EGFR/PHACTR1/MSRB2/LIMCH1/EPB41L3/FLNB/SYNE1/TMOD4/HPCA/FMN1/LCP1/MYH4/MYL2/PARK2/PLEC/SSH1/PARVA/ACTR3B/ERMN/S100A4/PARVG/NOD2/MICAL1/SLC4A1/CXCR4/CALD1/CAP2B/ANTXR1/GAS7/SCIN/ACTN1/RCS1/MICAL2                                                                                                                                                                                                                                                                                                                                                                                                                                                                                                                                                                                                                                                                                                                                                                                                                                                                                                                                                                                                                                                                                                                                                                                                                                                                                                                                                                                                                                                                                                                                                                                                                                                                                                                                                                                                                                                                                                                                                                                                                                                                                                          | 35  |

| Hypomethylated DMC, Biological Process |                    |           |             |          |          |          |                                                                                                                                                                                                                                                                                                                                                                                                                                                                                                                                                                                                                                                                                                                                                                                                                                                                                                                                                                                                                                                                                                                                                                                                                                                                                                                                                                                                                                                                                                                                                                                                                                                                                                                                                                                                                                                                                                                                                                                                                                                                                                                                                                                                                                                                                                                                                                                                                                                                                                                                                                                                                                                                                                                                                                                                                                                                                                                                                                                                                                                                                                                                                                                                                                                                                                                                                                                                                                                                                                                                                                                                                                                                                                                                                                                                                                                                                    |     |       |
|----------------------------------------|--------------------|-----------|-------------|----------|----------|----------|------------------------------------------------------------------------------------------------------------------------------------------------------------------------------------------------------------------------------------------------------------------------------------------------------------------------------------------------------------------------------------------------------------------------------------------------------------------------------------------------------------------------------------------------------------------------------------------------------------------------------------------------------------------------------------------------------------------------------------------------------------------------------------------------------------------------------------------------------------------------------------------------------------------------------------------------------------------------------------------------------------------------------------------------------------------------------------------------------------------------------------------------------------------------------------------------------------------------------------------------------------------------------------------------------------------------------------------------------------------------------------------------------------------------------------------------------------------------------------------------------------------------------------------------------------------------------------------------------------------------------------------------------------------------------------------------------------------------------------------------------------------------------------------------------------------------------------------------------------------------------------------------------------------------------------------------------------------------------------------------------------------------------------------------------------------------------------------------------------------------------------------------------------------------------------------------------------------------------------------------------------------------------------------------------------------------------------------------------------------------------------------------------------------------------------------------------------------------------------------------------------------------------------------------------------------------------------------------------------------------------------------------------------------------------------------------------------------------------------------------------------------------------------------------------------------------------------------------------------------------------------------------------------------------------------------------------------------------------------------------------------------------------------------------------------------------------------------------------------------------------------------------------------------------------------------------------------------------------------------------------------------------------------------------------------------------------------------------------------------------------------------------------------------------------------------------------------------------------------------------------------------------------------------------------------------------------------------------------------------------------------------------------------------------------------------------------------------------------------------------------------------------------------------------------------------------------------------------------------------------------------|-----|-------|
|                                        | Description        | GeneRatio | BgRatio     | pvalue   | p.adjust | qvalue   | geneID                                                                                                                                                                                                                                                                                                                                                                                                                                                                                                                                                                                                                                                                                                                                                                                                                                                                                                                                                                                                                                                                                                                                                                                                                                                                                                                                                                                                                                                                                                                                                                                                                                                                                                                                                                                                                                                                                                                                                                                                                                                                                                                                                                                                                                                                                                                                                                                                                                                                                                                                                                                                                                                                                                                                                                                                                                                                                                                                                                                                                                                                                                                                                                                                                                                                                                                                                                                                                                                                                                                                                                                                                                                                                                                                                                                                                                                                             |     | Count |
| GO:0008150                             | biological_process | 590/590   | 15230/17046 | 3.93E-30 | 2.05E-26 | 1.78E-26 | AKT3/ABI1/TANK/CD300LD/GNE/ZNF783/CDH9/CDH12/SUGP2/FARP1/KLRG1/RCAN2/CDKN1C/SPEG/MRVI1/TRDN/SPON2/COG5/PITRM1/TACC2/MTHFS/PDPN/CELF1/GJB6/PNR C1/TMED10/LECT1/RER1/ESM1/ADAM29/HNRNPUL1/RPP14/CHGA/CHI3L1/ERLIN2/CHI3L2/PPK3/EGLN2/TP53TG1/ATXN2L/KIF12/ACOT7/PDAP1/EXOC3/CHRNA1/CHRNA2/CARD 16/GPRIN1/SORCS1/C1QTNF7/GBP4/PANX3/RBP7/GALNT15/AP3S1/FAT3/CLN5/MRPL52/CCR1/SLC51B/SEZ6/TNFAIP8L1/CNP/AADAACL3/NEU4/COL9A3/COMP/MAP3K8/ADM/IL3 1RA/EGFLAM/UBLCP1/HUS1B/OR2A14/CPM/CPS1/NDUFAF6/PXDNL/CRABP1/ZNF358/CRYBB3/MIB2/PARP4/MPP7/LDLRAD3/FAM101A/B3GLCT/MGAT5B/CSTA/KLC3/ZNF738/AB CC13/SMYD1/SGOL1/PPM1L/SH3D19/CYLD/MBOAT1/ESCO2/CYP11A1/ZNF782/DOB1/LONRF2/DDOST/ZNF366/BHLHA15/DIO3/DLG2/DMBT1/DNAH6/ABAT/DPH1/DTNA/AGXT/E EF2/EFNA2/EIF4G1/A2M/ELK4/ANKRD23/LIPH/SLC10A4/ENO2/ADCK5/EPHA1/ESR1/F11/FAH/FAT2/SPATA13/PRSS54/FCGR2A/PHACTR1/FGA/FGF10/FHIT/BTBD3/SBNO2/TRAK1/MSRB2/FOXL1/FOXC2/EXPH5/AKR1B1/NFASC/EPB41L3/GGA3/DIP2A/FLOT2/MCL1/TBC1D1/RHOB2/NUP210/NEDD4L/SYNE1/PSD3/PPP1R13B/PUM2/ARHGEF18/RYPB/MORC3 /MAPK8IP2/TSSK2/VGLL2/SLC37A4/RASGEF1C/RNF144B/ZNF549/ST6GALNAC3/SAMM50/DFNB31/ALS2CL/PNKD/SEC31B/ACOT11/STEAP2/GAS2/FBXL21/LCE2B/SACS/GATM/GB GT1/PLEK2/SLC17A5/ADGRF1/RPS6KC1/PABPC1/AKAP8L/DNAJC2/FGF22/NPTN/CLUL1/PDE7B/CYTH4/AMPD3/DHHD/BMP10/ZNF638/ZNF311/TMPRSS12/ZNF844/THEM5/GPR26 /EOGT/FFAR2/GRB10/MRPS18B/GRIK4/DNAJC15/SCG3/TMOD4/GUCY1A3/GPR132/PADI1/HAS1/SOX8/HK1/HLA-DOA/HLA-DPA1/ANXA13/NR4A1/ACACB/HOXC4/AGFG2/HRH1/HSD11B1/HSPA1L/HSP90AB1/HTR3A/DUPD1/ADAMTSL5/ANKRD45/TFAP2E/ID3/ZC3H12D/RSP02/CD300E/NME9/IGF1/IGF2 /GPR142/LCE1C/LCE1D/LCE2D/IL1R1/IL1RN/IL10RA/AQP2/IL11RA/IL12RB2/IL15RA/PRSS41/IL16/FOXK2/AQP5/INHBA/INPP5A/IRF1/AQP9/ITGA7/ITGB2/ITGB7/ITIH4/IVL/JUP/CD8 2/USP50/KCNH2/KCNJ8/KCNJ9/KCNMB1/KDR/KIF25/IPO5/AMIGO3/HESS/AFF3/LAMA3/STMN1/OR2A5/LCP1/MUC21/LDLR/ARHGDI/LGALS9/LHCGR/LMNA/LMO2/RAB19/SRRD/LPP/MC2R/MCC/ME2/MFNG/MGAT1/SCGB2A1/MITF/LHX8/ASGR1/MOCS1/MOV10/MP2/PLEKHG7/MYH4/MYL2/NUBP1/NDUFB4/DRG1/NEU1/ATP1A2/NFATC3/NHLH2/NPPC/N RAS/OAS2/OPRL1/OR2C1/OR3A2/SLC22A18/P2RY6/PAFAH2/ATP5B/IL21R/ANO7/PARK2/SPOCK3/UTP11L/PRR16/CHST15/PCYOX1/C11orf73/SIRT6/PDE6B/ATP8A2/PI3/PITX2/PK HD1/PKM/PLA2G2A/PLAGL1/LRP1B/PRKAG3/PML/RIPPLY3/FXYD6/GPR84/SLCO1C1/PNLIPL/TLR9/TREM1/SSH1/RIN2/POU2AF1/APBB1P/MXRA8/FBLIM1/MED18/PALMD/CYP2W1 /RPP25/BANP/PPP1CB/HERC6/ELP3/DNAJC17/GOLPH3L/PPP2R2B/FANCI/MOB1A/SLC47A1/SLC29A3/MIS18BP1/TRPV6/SLC30A10/CHRNA9/PEX26/FRMD4A/CARKD/PARVA/PRKA R1B/TTC17/IFT122/ERMARD/MCTP2/LMBRD1/CSGALNACT1/PAG1/CISD1/WBS2/MYNN/APOBR/MAPK3/MAP2K2/PCDHGB3/PRKRIR/PROC/MRAP/TRPV5/PRMT8/HTRA1/SLAMF8 /CDC42SE1/PAK6/ARNTL2/RGMA/PRDM11/PSMD7/SLURP1/PTGFR/PLEKHG5/TENM2/GATAD2B/ERNM/KLHL8/RDH14/MARK4/PTPRE/CREBZF/ABHD17C/FAM60A/ACTA2/RFC2/T RIM27/RGR/RGS12/RIT2/RPA3/BGLAP/SCT/CCL11/ABHD4/MRPS14/PRSS22/NPAS3/PARVG/NOD2/TINAGL1/STRA6/MAP1LC3B2/ARHGAP9/GZF1/DNAI2/PCDH20/TMEM237/VPS3 3A/BMP4/SLC4A1/ZNF649/ZG16/SLC6A12/SLC8A1/SLC9A3/SLC20A2/BMPR1B/SLIT1/BRD9/ZSCAN18/TMEM108/BOK/BPI/SRP68/STAT2/STK3/SUPT6H/BST2/TCB2/ZEB1/TEAD3/T ERF1/TGM2/TCHH/TNFAIP3/TNFRSF1A/TRAF5/TRPC6/TRPM2/CCR2/TNFRSF4/UCP1/WNT10B/ZAP70/ZNF7/CA7/CACNA1E/MOGS/RAB7A/ERL3/CCDC86/CARD14/BCL2L14/LST1/C ERS4/ZNF665/CSPP1/ERMP1/CALD1/FAM188A/TMEM62/GPR157/ZC3H12A/FAAP100/CEPBA4/C6orf25/ZNF436/EEPD1/CLPTM1L/CALR/COL21A1/QTRT1/SLIRP/CAST/CAPZB/DYNL RB2/SLC25A18/SPATA16/ANTXR1/MFSD7/CMAHP/BFSP2/ATP13A4/ZNF397/NR0B2/MON1A/CASQ1/HOPX/PARD6G/KRBA1/TTBK1/RETNLB/TRIM63/GTPBP3/RAE1/SLC43A1/IFIT M1/SCIN/CDK10/KMO/RUNX1/TP63/RUNX3/SERPINA6/IRS2/ACTN1/CRADD/TNFRSF11A/ALDH1A2/STK19/SYJ2/SPHK1/BUD31/CCNA1/ENDOU/SKAP2/STBD1/HSPB3/TSPAN18/C H25H/CCRL2/ERI1/PRC1/STARD13/PIAS2/MAP3K6/SYT7/ESAM/SLC16A3/CBFA2T2/RSAD2/AURKB/DAPL1/CD8A/CCDC102A/NEURL3/TRIP10/ADIPOQ/ENTPD3/PREPL/RAB36/MIC AL2/N4BP1/VGLL4/NUP93/RAPGEF2/CD79A/ZBTB39/IQSEC1/LPGAT1/FGF19/NR1H4 | 590 |       |



|            |                         |         |             |          |          |          |                                                                                                                                                                                                                                                                                                                                                                                                                                                                                                                                                                                                                                                                                                                                                                                                                                                                                                                                                                                                                                                                                                                                                                                                                                                                                                                                                                                                                                                                                                                                                                                                                                                                                                                                                                                                                                                                                                                                                                                                                                                                                                                                                                                                                                                                                                                                                                                                                                                                                                                                                                                                                                                                                                                                                                                                                                                                                                                                                                                                                                                                                                                                                                                                                                              |     |
|------------|-------------------------|---------|-------------|----------|----------|----------|----------------------------------------------------------------------------------------------------------------------------------------------------------------------------------------------------------------------------------------------------------------------------------------------------------------------------------------------------------------------------------------------------------------------------------------------------------------------------------------------------------------------------------------------------------------------------------------------------------------------------------------------------------------------------------------------------------------------------------------------------------------------------------------------------------------------------------------------------------------------------------------------------------------------------------------------------------------------------------------------------------------------------------------------------------------------------------------------------------------------------------------------------------------------------------------------------------------------------------------------------------------------------------------------------------------------------------------------------------------------------------------------------------------------------------------------------------------------------------------------------------------------------------------------------------------------------------------------------------------------------------------------------------------------------------------------------------------------------------------------------------------------------------------------------------------------------------------------------------------------------------------------------------------------------------------------------------------------------------------------------------------------------------------------------------------------------------------------------------------------------------------------------------------------------------------------------------------------------------------------------------------------------------------------------------------------------------------------------------------------------------------------------------------------------------------------------------------------------------------------------------------------------------------------------------------------------------------------------------------------------------------------------------------------------------------------------------------------------------------------------------------------------------------------------------------------------------------------------------------------------------------------------------------------------------------------------------------------------------------------------------------------------------------------------------------------------------------------------------------------------------------------------------------------------------------------------------------------------------------------|-----|
| GO:0044699 | single-organism process | 503/590 | 12449/17046 | 3.90E-13 | 5.09E-10 | 4.42E-10 | AKT3/ABI1/TANK/GNE/CDH9/CDH12/FARP1/KLRG1/RCAN2/CDKN1C/SPEG/MRV11/TRDN/SPON2/COG5/TACC2/MTHFS/PDPN/CELF1/GJB6/TMED10/LECT1/RER1/ESM1/ADAM29/CHGA/CHI3L1/ERLIN2/PKP3/EGLN2/KIF12/ACOT7/PDAP1/EXOC3/CHRNA1/CHRNA2/CARD16/GPRIN1/SORCS1/PANX3/GALNT15/AP3S1/FAT3/CLN5/MRPL52/CCR1/SLC51B/SEZ6/TNFAIP8L1/CNP/NEU4/COL9A3/COMP/MAP3K8/ADM/IL31RA/EGFLAM/HUS1B/OR2A14/CPS1/NDUF4F6/PXDNL/CRABP1/ZNF358/CRYBB3/MIB2/PARP4/MPP7/FAM101A/B3GLCT/MGAT5B/CSTA/KLC3/ABCC13/SMYD1/SGOL1/PPM1L/SH3D19/CYLD/MBOAT1/ESCO2/CYP11A1/DOB1/DDOST/ZNF366/BHLHA15/DIO3/DLG2/DMBT1/DNAH6/ABAT/DPH1/DTNA/AGXT/EEF2/EFNA2/EIF4G1/A2M/ELK4/LIPH/SLC10A4/ENO2/EPHA1/ESR1/F11/FAH/FAT2/SPATA13/FCGR2A/PHACTR1/FGA/FGF10/FHIT/BTBD3/SBNO2/TRAK1/MSRB2/FOXO1/FOXO2/EXPH5/AKR1B1/NFASC/EPB41L3/DIP2A/FLOT2/MCL1/RHOBTB2/NUP210/NEDD4L/SYNE1/PSD3/PPP1R13B/PUM2/ARHGFE18/RYPB/MORC3/MAPK8IP2/TSSK2/VGLL2/SLC37A4/RASGEF1C/RNF144B/ST6GALNAC3/SAMM50/DFNB31/ALS2CL/PNKD/ACOT11/STEAP2/GAS2/LCE2B/GATM/GBGT1/PLEK2/SLC17A5/ADGRF1/RPS5K6C1/PABPC1/FGF22/NPTN/CLU L1/PDE7B/CYTH4/AMPD3/DHHD/BMP10/THEM5/GPR26/EOGT/FFAR2/GRB10/MRPS18B/GRIK4/DNAJC15/SCG3/TMOD4/GUCY1A3/GPR132/PADI1/HAS1/SOX8/HK1/HLA-DOA/HLA-DPA1/ANXA13/NR4A1/ACACB/HOXC4/HRH1/HSD11B1/HSPA1L/HSP90A1/HTR3A/TFAP2E/ID3/ZC3H12D/RSP02/NME9/IGF1/IGF2/GPR142/LCE1C/LCE1D/LCE2D/IL1R1/IL1RN/IL1ORA/AQP2/IL11RA/IL12RB2/IL15RA/IL16/FOXK2/AQP5/INHBA/INPP5A/IRF1/AQP9/ITGA7/ITGB2/ITGB7/IVL/JUP/CD82/USP50/KCNH2/KCNJ8/KCNJ9/KCNMB1/KDR/KIF25/IPO5/AMIGO3/HESS/AFF3/LAMA3/STMN1/OR2A5/LCP1/MUC21/LDLR/ARHGDA/LGALS9/LHCGR/LMNA/LMO2/RAB19/MC2R/MCC/ME2/MFNG/MGAT1/SCGB2A1/MITF/LHX8/ASGR1/MOCS1/MOV10/MPZ/PLEKHG7/MYH4/MYL2/NUBP1/NDUFB4/DRG1/NEU1/ATP1A2/NFATC3/NHLH2/NPPC/NRAS/OAS2/OPRL1/OR2C1/OR3A2/SLC22A18/P2RY6/PAFAH2/ATP5B/IL21R/ANO7/PARK2/SPOCK3/UTP11L/PRR16/CHST15/PCYOX1/C11orf73/SIRT6/PDE6B/ATP8A2/PITX2/PKH1/PKM/PLA2G2A/PLAGL1/PRKAG3/PML/RIPPLY3/FXYD6/GPR84/SLCO1C1/PNLP/TLR9/TREM1/SSH1/RIN2/APBB1P/MXRA8/FBLIM1/PALMD/CYP2W1/BANP/PPP1CB/HERC6/ELP3/GOLPH3L/PPP2R2B/FANCI/MOB1A/SLC47A1/SLC29A3/MIS18BP1/TRPV6/SLC30A10/CHRNA9/PEX26/FRMD4A/PARVA/PRKAR1B/TTC17/IFT122/ERMARD/MCTP2/LMBRD1/CSGALNACT1/PAG1/CISD1/WBS2/APOBR/MAPK3/MAP2K2/PRKRIR/PROC/MRAP/TRPV5/PRMT8/HTRA1/SLAMF8/CDC42SE1/PAK6/RGMA/PSMD7/SLURP1/PTGFR/PLEKHG5/TENM2/ERMN/RDH14/MARK4/PTPRE/FAM60A/ACTA2/RFC2/TRIM27/RGR/RGS12/RIT2/RPA3/BGLAP/SCT/CCL11/ABHD4/MRPS14/NPAS3/PARV/NOD2/TINAGL1/STRA6/ARHGAP9/GZF1/DNAI2/TMEM237/VPS33A/BMP4/SLC4A1/SLC6A12/SLC8A1/SLC9A3/SLC20A2/BMPR1B/SLIT1/BOK/BPI/SRP68/STAT2/STK3/SUPT6H/BST2/ZE1/TEAD3/TERF1/TGM2/TCHH/TNFAIP3/TNFRSF1A/TRAFA5/TRPC6/TRPM2/CCR2/TNFRSF4/UCP1/WNT10B/ZAP70/ZNF7/CA7/CACNA1E/MOGS/RAB7A/CARD14/BCL2L14/LST1/CERS4/CSPP1/CALSI/FAM188A/GPR157/ZC3H12A/CPEB4/C6orf25/EEPD1/CLPTM1L/CAL7/CA7/CACNA1E/QTRT1/SLURP/CAST/CAPZB/DYNLRB2/SLC25A18/SPATA16/ANTXR1/MFSD7/CMAHP/BFSP2/ATP13A4/NROB2/MON1A/CASQ1/HOPX/PARD6G/TTBK1/RETNLB/TRIM63/RAE1/SLC43A1/IFITM1/SCIN/CDK10/KMO/RUNX1/TP63/RUNX3/SERPINA6/IRS2/ACTN1/CRADD/TNFRSF11A/ALDH1A2/SYH2/SPHK1/CCNA1/SKAP2/STBD1/TSPAN18/CH25H/CCR2/ERI1/PRC1/STAR D13/PIAS2/MAP3K6/SYT7/ESAM/SLC16A3/CBFA2T2/RSAD2/AURKB/DAPL1/CD8A/TRIP10/ADIPOQ/ENTPD3/RAB36/MICAL2/NUP93/RAPGEF2/CD79A/IQSEC1/LPGAT1/FGF19/NR1H4 | 503 |
| GO:0065007 | biological regulation   | 431/590 | 10343/17046 | 9.59E-11 | 1.00E-07 | 8.68E-08 | AKT3/ABI1/TANK/ZNF783/FARP1/KLRG1/RCAN2/CDKN1C/SPEG/MRV11/TRDN/SPON2/PITRM1/TACC2/PDPN/CELF1/GJB6/PNRC1/TMED10/LECT1/RER1/ESM1/HNRNPUL1/CHGA/CHI3L1/ERLIN2/EGLN2/ATXN2L/PDAP1/CHRNA1/CHRNA2/CARD16/SORCS1/AP3S1/CLN5/CCR1/SLC51B/SEZ6/TNFAIP8L1/CNP/COMP/MAP3K8/ADM/IL31RA/EGFLAM/HUS1B/OR2A14/CPS1/CRABP1/ZNF358/MIB2/MPP7/LDLRAD3/FAM101A/CSTA/ZNF738/SMYD1/SGOL1/PPM1L/SH3D19/CYLD/ESCO2/CYP11A1/ZNF782/DOB1/ZNF366/BHLHA15/DIO3/DLG2/DMBT1/ABAT/DTNA/AGXT/EEF2/EFNA2/EIF4G1/A2M/ELK4/EPHA1/ESR1/F11/SPATA13/FCGR2A/PHACTR1/FGA/FGF10/FHIT/SBNO2/TRAK1/MSRB2/FOXO1/FOXO2/EXPH5/AKR1B1/EPB41L3/GGA3/DIP2A/FLOT2/MCL1/TBC1D1/RHOBTB2/NUP210/NEDD4L/SYNE1/PSD3/PPP1R13B/PUM2/ARHGFE18/RYPB/MORC3/MAPK8IP2/TSSK2/VGLL2/SLC37A4/RASGEF1C/RNF144B/ZNF549/DFNB31/ALS2CL/PNKD/ACOT11/STEAP2/GAS2/FBXL21/SACS/PLEK2/ADGRF1/RPS5K6C1/PABPC1/DNAJC2/FGF22/NPTN/PDE7B/CYTH4/AMPD3/BMP10/ZNF638/ZNF311/ZNF844/GPR26/FFAR2/GRB10/GRIK4/DNAJC15/SCG3/TMOD4/GUCY1A3/GPR132/HAS1/SOX8/HK1/HLA-DOA/HLA-DPA1/ANXA13/NR4A1/ACACB/HOXC4/AGFG2/HRH1/HSPA1L/HSP90A1/HTR3A/TFAP2E/ID3/ZC3H12D/RSP02/NME9/IGF1/IGF2/GPR142/IL1R1/IL1RN/IL10RA/AQP2/IL11RA/IL12RB2/IL15RA/IL16/FOXK2/AQP5/INHBA/IRF1/AQP9/ITGA7/ITGB2/ITGB7/ITIH4/JUP/CD82/USP50/KCNH2/KCNJ8/KCNJ9/KCNMB1/KDR/KIF25/IPO5/AMIGO3/HESS/AFF3/LAMA3/STMN1/OR2A5/LCP1/LDLR/ARHGDA/LGALS9/LHCGR/LMNA/LMO2/RAB19/MC2R/MCC/ME2/MFNG/SCGB2A1/MITF/LHX8/MOV10/MPZ/PLEKHG7/MYL2/NUBP1/NEU1/ATP1A2/NFATC3/NHLH2/NPPC/NRAS/OAS2/OPRL1/OR2C1/OR3A2/P2RY6/PAFAH2/ATP5B/IL21R/ANO7/PARK2/SPOCK3/UTP11L/PRR16/C11orf73/SIRT6/PDE6B/ATP8A2/Pi3/PITX2/PKH1/PLA2G2A/PLAGL1/PRKAG3/PML/RIPPLY3/FXYD6/GPR84/PNLP/TLR9/TREM1/SSH1/RIN2/POU2AF1/APBB1P/FBLIM1/MED18/PALMD/BANP/PPP1CB/ELP3/DNAJC17/GOLPH3L/PPP2R2B/FANCI/MOB1A/TRPV6/SLC30A10/CHRNA9/PARVA/PRKAR1B/IFT122/MCTP2/LMBRD1/PAG1/CISD1/WBS2/MYNN/MAPK3/MAP2K2/PRKRIR/PROC/MRAP/PRMT8/HTRA1/SLAMF8/CDC42SE1/PAK6/ARNTL2/RGMA/PRDM11/PSMD7/SLURP1/PTGFR/PLEKHG5/TENM2/GATAD2B/ERMN/RDH14/MARK4/PTPRE/CREBZF/FAM60A/ACTA2/RFC2/TRIM27/RGR/RGS12/RIT2/RPA3/BGLAP/SCT/CCL11/ABHD4/NPAS3/NOD2/STRA6/ARHGAP9/GZF1/TMEM237/VPS33A/BMP4/SLC4A1/ZNF649/SLC6A12/SLC8A1/SLC9A3/BMPR1B/SLIT1/BRD9/ZSCAN18/BOK/BPI/STAT2/STK3/SUPT6H/BST2/TCEB2/ZE1/TEAD3/TERF1/TGM2/TNFAIP3/TNFRSF1A/TRAFA5/TRPC6/CCR2/TNFRSF4/UCP1/WNT10B/ZAP70/ZNF7/CA7/CACNA1E/RAB7A/CARD14/BCL2L14/LST1/ZNF665/CSPP1/GPR157/ZC3H12A/CPEB4/C6orf25/ZNF436/CALR/SLURP/CAST/CAPZB/ANTXR1/CMAHP/ATP13A4/ZNF397/NROB2/CASQ1/HOPX/TTBK1/TRIM63/RAE1/IFITM1/SCIN/CDK10/RUNX1/TP63/RUNX3/SERPINA6/IRS2/ACTN1/CRADD/TNFRSF11A/ALDH1A2/SPHK1/BUD31/CCNA1/SKAP2/TSPAN18/CCR2/ERI1/PRC1/STAR D13/PIAS2/MAP3K6/SYT7/ESAM/SLC16A3/CBFA2T2/RSAD2/AURKB/DAPL1/CD8A/TRIP10/ADIPOQ/RAB36/MICAL2/N4BP1/VGLL4/NUP93/RAPGEF2/CD79A/ZBTB39/IQSEC1/FGF19/NR1H4                                                                                                                                                                                                                                                                                                                                                                                                                                                                   | 431 |



|            |                                  |         |            |          |          |          |                                                                                                                                                                                                                                                                                                                                                                                                                                                                                                                                                                                                                                                                                                                                                                                                                                                                                                                                                                                                                                                                                                                                                                                                                                                                                                                                                                                                                                                                                                                                                                                                                                                                                                                                                                                                                                                                                                                                                                                                                                                                                                                                                                                                                                                                                                                                                                                                                                                                                                                                                                                                                                             |     |
|------------|----------------------------------|---------|------------|----------|----------|----------|---------------------------------------------------------------------------------------------------------------------------------------------------------------------------------------------------------------------------------------------------------------------------------------------------------------------------------------------------------------------------------------------------------------------------------------------------------------------------------------------------------------------------------------------------------------------------------------------------------------------------------------------------------------------------------------------------------------------------------------------------------------------------------------------------------------------------------------------------------------------------------------------------------------------------------------------------------------------------------------------------------------------------------------------------------------------------------------------------------------------------------------------------------------------------------------------------------------------------------------------------------------------------------------------------------------------------------------------------------------------------------------------------------------------------------------------------------------------------------------------------------------------------------------------------------------------------------------------------------------------------------------------------------------------------------------------------------------------------------------------------------------------------------------------------------------------------------------------------------------------------------------------------------------------------------------------------------------------------------------------------------------------------------------------------------------------------------------------------------------------------------------------------------------------------------------------------------------------------------------------------------------------------------------------------------------------------------------------------------------------------------------------------------------------------------------------------------------------------------------------------------------------------------------------------------------------------------------------------------------------------------------------|-----|
| GO:0050794 | regulation of cellular process   | 394/590 | 9347/17046 | 1.23E-09 | 9.87E-07 | 8.56E-07 | AKT3/ABI1/TANK/ZNF783/FARP1/KLRG1/RCAN2/CDKN1C/SPEG/MRV1/TRDN/TACC2/PDPN/CEL1/GJB6/PNRC1/TMED10/LECT1/RER1/ESM1/HNRNPUL1/CHGA/CHI3L1/ERLIN2/EGLN2/ATXN2L/PDAP1/CHRNA1/CHRNA2/CARD16/SORCS1/AP3S1/CCR1/SLC51B/SEZ6/TNFAIP8L1/COMP/MAP3K8/ADM/IL31RA/EGFLAM/HUS1B/OR2A14/CRABP1/ZNF358/MIB2/MPP7/FAM101A/CSTA/ZNF738/SMYD1/SGOL1/PPM1L/SH3D19/CYLD/ESCO2/ZNF782/DBB1/ZNF366/BHLHA15/DLG2/DMBT1/ABAT/DTNA/AGXT/EEF2/EFNA2/EIF4G1/A2M/ELK4/EPHA1/ESR1/SPATA13/FCGR2A/FGA/FGF10/FHIT/SBNO2/TRAK1/MSRB2/FOXL1/FOX2/EXPH5/AKR1B1/EPB41L3/DIP2A/FLOT2/MCL1/RHOBTB2/NUP210/NEDD4L/PSD3/PPP1R13B/PUM2/ARHGFE18/RYBP/MORC3/MAPK8IP2/TSSK2/VGLL2/RASGEF1C/RNF144B/ZNF549/ALS2C/L/PLNKB/ACOT11/GAS2/SACS/PLEK2/ADGRF1/RPS6KC1/PABPC1/DNAJC2/FGF22/NPTN/PDE7B/CYTH4/BMP10/ZNF638/ZNF311/ZNF844/GPR26/FFAR2/GRB10/GRIK4/DNAJC15/TMOD4/GUCY1A3/GPR132/HAS1/SOX8/HK1/HLA-DOA/HLA-DPA1/ANXA13/NR4A1/ACACB/HOXC4/HRH1/HSPA1L/HSP90AB1/HTR3A/TFAP2E/ID3/ZC3H12D/RSP02/NME9/IGF1/IGF2/GPR142/IL1R1/IL1RN/IL10RA/IL11RA/IL12RB2/IL15RA/IL16/FOXK2/INHBA/IRF1/ITGA7/ITGB2/ITGB7/ITIH4/JUP/CD82/USP50/KCNH2/KCNJ8/KCNJ9/KDR/KIF25/IPO5/AMIGO3/HES5/AFF3/LAMA3/STMN1/OR2A5/LCP1/LDLR/ARHGDI/LGALS9/LHCGR/LMNA/LMO2/RAB19/MC2R/MCC/ME2/MFNG/SCGB2A1/MITF/LHX8/MOV10/MPZ/PLEKHG7/MYL2/NUBP1/NEU1/ATP1A2/NFATC3/NHLH2/NPPC/NRAS/OAS2/OPRL1/OR2C1/OR3A2/P2RY6/PAFAH2/ATP5B/IL21R/PARK2/SPOCK3/UTP11L/PRR16/C11orf73/SIRT6/PDE6B/ATP8A2/PI3/PITX2/PKHD1/PLA2G2A/PLAGL1/PRKAG3/PML/RIPPLY3/FXYD6/GPR84/PNLIP/TLR9/TREM1/SSH1/RIN2/POU2AF1/APBB1P/FBLIM1/MED18/PALMD/BANP/PPP1CB/ELP3/DNAJC17/GOLPH3L/PPP2R2B/FANCI/MOB1A/TRPV6/SLC30A10/CHRNA9/PARVA/PRKAR1B/IFT122/MCTP2/LMBRD1/PAG1/CISD1/WSB2/MYNN/MAPK3/MAP2K2/PRKRIR/PROC/MRAP/PRMT8/HTRA1/SLAMF8/CDC42SE1/PAK6/ARNTL2/RGMA/PRDM11/PSMD7/SLURP1/PTGFR/PLEKHG5/TENM2/GATAD2B/ERMN/MARK4/PTPRE/CREBZF/FAM60A/TRIM27/RGR/RGS12/RIT2/RPA3/BGLAP/SCT/CCL11/NPAS3/NOD2/STRA6/ARHGAP9/GZF1/TMEM237/BMP4/ZNF649/SLC8A1/BMPR1B/SLIT1/BRD9/ZSCAN18/BOK/BPI/STAT2/STK3/SUPT6H/BST2/TCEB2/ZEB1/TEAD3/TERF1/TGM2/TNFAIP3/TNFRSF1A/TRAFA5/TRPC6/CCR2/TNFRSF4/UCP1/WNT10B/ZAP70/ZNF7/CA7/CACNA1E/RAB7A/CARD14/BCL2L14/LST1/ZNF665/CSPP1/GPR157/ZC3H12A/CPEB4/C6orf25/ZNF436/CALR/SLIRP/CAST/CAZB/ANTXR1/CMAHP/ZNF397/NROB2/CASQ1/HOPX/TTBK1/TRIM63/RAE1/IFITM1/SCIN/CDK10/RUNX1/TP63/RUNX3/SERPINA6/IRS2/ACTN1/CRADD/TNFRSF11A/ALDH1A2/SPHK1/BUD31/CCNA1/SKAP2/TSPAN18/CCRL2/PRC1/STARD13/PIAS2/MAP3K6/SYT7/CBFA2T2/RSAD2/AURKB/DAPL1/CD8A/TRIP10/ADIPOQ/RAB36/MICAL2/N4BP1/VGLL4/NUP93/RAPGEF2/CD79A/ZBTB39/IQSEC1/FGF19/NR1H4                                                                                                      | 394 |
| GO:0050789 | regulation of biological process | 410/590 | 9837/17046 | 1.32E-09 | 9.87E-07 | 8.56E-07 | AKT3/ABI1/TANK/ZNF783/FARP1/KLRG1/RCAN2/CDKN1C/SPEG/MRV1/TRDN/SPON2/PITRM1/TACC2/PDPN/CEL1/GJB6/PNRC1/TMED10/LECT1/RER1/ESM1/HNRNPUL1/CHGA/CHI3L1/ERLIN2/EGLN2/ATXN2L/PDAP1/CHRNA1/CHRNA2/CARD16/SORCS1/AP3S1/CCR1/SLC51B/SEZ6/TNFAIP8L1/COMP/MAP3K8/ADM/IL31RA/EGFLAM/HUS1B/OR2A14/CP51/CRABP1/ZNF358/MIB2/MPP7/LDLRAD3/FAM101A/CSTA/ZNF738/SMYD1/SGOL1/PPM1L/SH3D19/CYLD/ESCO2/ZNF782/DBB1/ZNF366/BHLHA15/DIO3/DLG2/DMBT1/ABAT/DTNA/AGXT/EEF2/EFNA2/EIF4G1/A2M/ELK4/EPHA1/ESR1/F11/SPATA13/FCGR2A/PHACTR1/FGA/FGF10/FHIT/SBNO2/TRAK1/MSRB2/FOXL1/FOX2/EXPH5/AKR1B1/EPB41L3/GGA3/DIP2A/FLOT2/MCL1/TBC1D1/RHOBTB2/NUP210/NEDD4L/PSD3/PPP1R13B/PUM2/ARHGFE18/RYBP/MORC3/MAPK8IP2/TSSK2/VGLL2/SLC37A4/RASGEF1C/RNF144B/ZNF549/ALS2C/L/PNKD/ACOT11/GAS2/FBXL21/SACS/PLEK2/ADGRF1/RPS6KC1/PABPC1/DNAJC2/FGF22/NPTN/PDE7B/CYTH4/BMP10/ZNF638/ZNF311/ZNF844/GPR26/FFAR2/GRB10/GRIK4/DNAJC15/TMOD4/GUCY1A3/GPR132/HAS1/SOX8/HK1/HLA-DOA/HLA-DPA1/ANXA13/NR4A1/ACACB/HOXC4/AGFG2/HRH1/HSPA1L/HSP90AB1/HTR3A/TFAP2E/ID3/ZC3H12D/RSP02/NME9/IGF1/IGF2/GPR142/IL1R1/IL1RN/IL10RA/IL11RA/IL12RB2/IL15RA/IL16/FOXK2/INHBA/IRF1/ITGA7/ITGB2/ITGB7/ITIH4/JUP/CD82/USP50/KCNH2/KCNJ8/KCNJ9/KDR/KIF25/IPO5/AMIGO3/HES5/AFF3/LAMA3/STMN1/OR2A5/LCP1/LDLR/ARHGDI/LGALS9/LHCGR/LMNA/LMO2/RAB19/MC2R/MCC/ME2/MFNG/SCGB2A1/MITF/LHX8/MOV10/MPZ/PLEKHG7/MYL2/NUBP1/NEU1/ATP1A2/NFATC3/NHLH2/NPPC/NRAS/OAS2/OPRL1/OR2C1/OR3A2/P2RY6/PAFAH2/ATP5B/IL21R/PARK2/SPOCK3/UTP11L/PRR16/C11orf73/SIRT6/PDE6B/ATP8A2/PI3/PITX2/PKHD1/PLA2G2A/PLAGL1/PRKAG3/PML/RIPPLY3/FXYD6/GPR84/PNLIP/TLR9/TREM1/SSH1/RIN2/POU2AF1/APBB1P/FBLIM1/MED18/PALMD/BANP/PPP1CB/ELP3/DNAJC17/GOLPH3L/PPP2R2B/FANCI/MOB1A/TRPV6/SLC30A10/CHRNA9/PARVA/PRKAR1B/IFT122/MCTP2/LMBRD1/PAG1/CISD1/WSB2/MYNN/MAPK3/MAP2K2/PRKRIR/PROC/MRAP/PRMT8/HTRA1/SLAMF8/CDC42SE1/PAK6/ARNTL2/RGMA/PRDM11/PSMD7/SLURP1/PTGFR/PLEKHG5/TENM2/GATAD2B/ERMN/MARK4/PTPRE/CREBZF/FAM60A/ACTA2/TRIM27/RGR/RGS12/RIT2/RPA3/BGLAP/SCT/CCL11/NPAS3/NOD2/STRA6/ARHGAP9/GZF1/TMEM237/VPS33A/BMP4/ZNF649/SLC8A1/SLC9A3/BMPR1B/SLIT1/BRD9/ZSCAN18/BOK/BPI/STAT2/STK3/SUPT6H/BST2/TCEB2/ZEB1/TEAD3/TERF1/TGM2/TNFAIP3/TNFRSF1A/TRAFA5/TRPC6/CCR2/TNFRSF4/UCP1/WNT10B/ZAP70/ZNF7/CA7/CACNA1E/RAB7A/CARD14/BCL2L14/LST1/ZNF665/CSPP1/GPR157/ZC3H12A/CPEB4/C6orf25/ZNF436/CALR/SLIRP/CAST/CAPZB/ANTXR1/CMAHP/ZNF397/NROB2/CASQ1/HOPX/TTBK1/TRIM63/RAE1/IFITM1/SCIN/CDK10/RUNX1/TP63/RUNX3/SERPINA6/IRS2/ACTN1/CRADD/TNFRSF11A/ALDH1A2/SPHK1/BUD31/CCNA1/SKAP2/TSPAN18/CCRL2/ERI1/PRC1/STARD13/PIAS2/MAP3K6/SYT7/CBFA2T2/RSAD2/AURKB/DAPL1/CD8A/TRIP10/ADIPOQ/RAB36/MICAL2/N4BP1/VGLL4/NUP93/RAPGEF2/CD79A/ZBTB39/IQSEC1/FGF19/NR1H4 | 410 |

|            |                               |         |            |          |          |          |                                                                                                                                                                                                                                                                                                                                                                                                                                                                                                                                                                                                                                                                                                                                                                                                                                                                                                                                                                                                                                                                                                                                                                                                                                                                                                                                                                                                                                                                                                                                                                                                                                                                                                                                                                                                                                                                                                                                                                                                                                                                                                                                                    |     |
|------------|-------------------------------|---------|------------|----------|----------|----------|----------------------------------------------------------------------------------------------------------------------------------------------------------------------------------------------------------------------------------------------------------------------------------------------------------------------------------------------------------------------------------------------------------------------------------------------------------------------------------------------------------------------------------------------------------------------------------------------------------------------------------------------------------------------------------------------------------------------------------------------------------------------------------------------------------------------------------------------------------------------------------------------------------------------------------------------------------------------------------------------------------------------------------------------------------------------------------------------------------------------------------------------------------------------------------------------------------------------------------------------------------------------------------------------------------------------------------------------------------------------------------------------------------------------------------------------------------------------------------------------------------------------------------------------------------------------------------------------------------------------------------------------------------------------------------------------------------------------------------------------------------------------------------------------------------------------------------------------------------------------------------------------------------------------------------------------------------------------------------------------------------------------------------------------------------------------------------------------------------------------------------------------------|-----|
| GO:0050896 | response to stimulus          | 333/590 | 7634/17046 | 4.93E-09 | 3.21E-06 | 2.79E-06 | AKT3/ABI1/TANK/FARP1/KLRG1/RCAN2/CDKN1C/MRV1/SPON2/PDPN/GJB6/TMED10/LECT1/ESM1/HNRPUL1/CHGA/CHI3L1/ERLIN2/EGLN2/TP53TG1/PDAP1/CHRNA1/CHRNA2/SORCS1/AP3S1/CCR1/SEZ6/TNFAIP8L1/CNP/COL9A3/MAP3K8/ADM/IL31RA/HUS1B/OR2A14/CP51/PXDNL/CRABP1/MIB2/PARP4/MPP7/SGOL1/PPM1/CYLD/ESCO2/CYP11A1/DB1/DDOST/ZNF366/BHLHA15/DMBT1/ABAT/DNA/AGXT/EFNA2/EIF4G1/A2M/ANKRD23/EPHA1/ESR1/F11/SPATA13/FCGR2A/FGA/FGF10/FHIT/SBNO2/MSRB2/FOX1L/FOX2/AKR1B1/NFASC/MCL1/RHOBTB2/NUP210/NEDD4L/PSD3/PPP1R13B/PUM2/ARHGEF18/MAPK8IP2/TSSK2/SLC37A4/RASGEF1C/ALS2CL/ACOT11/STEAP2/FBXL21/GATM/PLEK2/ADGRF1/RPS6KC1/DNAJC2/FGF22/NPTN/PDE7B/CYTH4/BMP10/GPR26/FFAR2/GRB10/GRIK4/DNAJC15/SCG3/GUCY1A3/GPR132/HAS1/SOX8/HK1/HLA-DOA/HLA-DPA1/NR4A1/HRH1/HSPA1L/HSP90AB1/HTR3A/ID3/RSPO2/CD300E/IGF1/IGF2/GPR142/LCE1D/IL1R1/IL1RN/IL10RA/AQP2/IL11RA/IL12RB2/IL15RA/IL16/INHBA/IRF1/AQP9/ITGA7/ITGB2/ITGB7/ITIH4/IVL/JUP/CD82/KCNH2/KCNJ8/KCNMB1/KDR/IPO5/HES5/AFF3/STMN1/OR2A5/LCP1/LDLR/ARHGDA/LGALS9/LHCGR/LMNA/LMO2/RAB19/MC2R/MCC/MFNG/SCGB2A1/MITF/ASGR1/MOV10/PLEKHG7/MYH4/NDUF4/ATP1A2/NFATC3/NPPC/NRAS/OAS2/OPRL1/OR2C1/OR3A2/SLC22A18/P2RY6/IL21R/PARK2/SPOCK3/C11orf73/SIRT6/PDE6B/ATP8A2/PITX2/PKHD1/PKM/PLA2G2A/PRKAG3/PML/GPR84/PNLIP/TLR9/TREM1/SSH1/RIN2/POU2AF1/APBB1IP/CYP2W1/PPP1CB/FANCI/MOB1A/SLC47A1/SLC30A10/CHRNA9/PARVA/PRKAR1B/IFT122/MCTP2/LMBRD1/PAG1/WSB2/MAPK3/MAP2K2/PRKRIR/PROC/HTRA1/SLAMF8/CDC42SE1/PAK6/ARNTL2/RGMA/PSMD7/PTGFR/PLEKHG5/TENM2/PTPRE/CREBZF/ACTA2/RFC2/TRIM27/RGR/RGS12/RIT2/RPA3/BGLAP/SCT/CCL11/NPAS3/NOD2/TINAGL1/STRA6/ARHGAP9/TMEM237/VPS33A/BMP4/SLC8A1/SLC9A3/BMPR1B/SLIT1/BOK/BPI/SRP68/STAT2/STK3/SUPT6H/BST2/TCEB2/ZEB1/TEAD3/TERF1/TEAD3/TGFB2/ZEB1/TFNIP3/TNFRSF1A/STAF5/TRPC6/TRPM2/CCR2/TNFRSF4/WNT10B/ZAP70/CA7/CACNA1E/RAB7A/CARD14/BCL2L14/LST1/GPR157/ZC3H12A/FAAP100/CPEB4/C6orf25/EEDP1/CALR/CAPZB/ANTXR1/CMAHP/BFSP2/NROB2/CASQ1/HOPX/TRIM63/RAE1/IFITM1/CDK10/KMO/RUNX1/TP63/RUNX3/IRS2/ACTN1/CRADD/TNFRSF11A/ALDH1A2/SPHK1/ENDOU/SKAP2/STBD1/HSPB3/TSPAN18/CCR2/PRC1/STARD13/PIAS2/MAP3K6/SYT7/ESAM/SLC16A3/RSA D2/AURKB/DAPL1/CD8A/TRIP10/ADIPOQ/RAB36/N4BP1/NUP93/RAPGEF2/CD79A/IQSEC1/FGF19/NR1H4 | 333 |
| GO:0007154 | cell communication            | 258/590 | 5832/17046 | 6.74E-07 | 0.00039  | 0.00034  | AKT3/ABI1/TANK/FARP1/KLRG1/RCAN2/CDKN1C/MRV1/TRDN/PDPN/GJB6/LECT1/ESM1/CHI3L1/ERLIN2/EGLN2/PDAP1/CHRNA1/CHRNA2/SORCS1/PANX3/AP3S1/CCR1/SEZ6/TNFAIP8L1/CNP/MAP3K8/ADM/IL31RA/OR2A14/CRABP1/MIB2/MPP7/SGOL1/PPM1/CYLD/DBB1/ZNF366/BHLHA15/DLG2/DMBT1/ABAT/DNA/AGXT/EFNA2/EIF4G1/A2M/EPHA1/ESR1/SPATA13/FCGR2A/FGA/FGF10/FHIT/FOX1L/FOX2/AKR1B1/NFASC/RHOBTB2/NUP210/NEDD4L/PSD3/PPP1R13B/PUM2/ARHGEF18/MAPK8IP2/TSSK2/SLC37A4/RASGEF1C/ALS2CL/PNKD/ACOT11/PLEK2/ADGRF1/RPS6KC1/FGF22/NPTN/PDE7B/CYTH4/BMP10/GPR26/FFAR2/GRB10/GRIK4/DNAJC15/GUCY1A3/GPR132/SOX8/HK1/HLA-DOA/HLA-DPA1/NR4A1/HRH1/HSPA1L/HSP90AB1/HTR3A/RSPO2/IGF1/IGF2/GPR142/IL1R1/IL1RN/IL10RA/AQP2/IL11RA/IL12RB2/IL15RA/INHBA/IRF1/ITGA7/ITGB2/ITGB7/JUP/CD82/KCNH2/KCNJ8/KCNJ9/KCNMB1/KDR/HES5/STMN1/OR2A5/LCP1/LDLR/ARHGDA/LGALS9/LHCGR/LMNA/RAB19/MC2R/MCC/MFNG/SCGB2A1/MITF/ASGR1/MOV10/MPZ/PLEKHG7/ATP1A2/NFATC3/NPPC/NRAS/OAS2/OPRL1/OR2C1/OR3A2/P2RY6/IL21R/PARK2/SPOCK3/PDE6B/PITX2/PKHD1/PLA2G2A/PRKAG3/PML/GPR84/PNLIP/TLR9/TREM1/RIN2/APBB1IP/PPP1CB/MOB1A/CHRNA9/PRKAR1B/IFT122/MCTP2/LMBRD1/PAG1/WSB2/MAPK3/MAP2K2/PRKRIR/HTRA1/CDC42SE1/PAK6/ARNTL2/RGMA/PSMD7/PTGFR/PLEKHG5/TENM2/PTPRE/RGR/RGS12/RIT2/BGLAP/SCT/CCL11/NOD2/STRA6/ARHGAP9/TMEM237/VPS33A/BMP4/SLC6A12/SLC8A1/BMPR1B/BOK/STAT2/STK3/BST2/ZEB1/TEAD3/TGFB2/ZEB1/TFNIP3/TNFRSF1A/TRAFA5/CCR2/TNFRSF4/WNT10B/ZAP70/CA7/CACNA1E/RAB7A/CARD14/BCL2L14/GPR157/CPEB4/C6orf25/CALR/ANTXR1/CMAHP/NROB2/CASQ1/TRIM63/RAE1/IFITM1/CDK10/RUNX1/TP63/RUNX3/IRS2/CRADD/TNFRSF11A/ALDH1A2/SPHK1/SKAP2/STBD1/TSPAN18/CCR2/PRC1/STARD13/PIAS2/MAP3K6/SYT7/RSAD2/AURKB/DAPL1/CD8A/TRIP10/ADIPOQ/RAB36/NUP93/RAPGEF2/CD79A/IQSEC1/FGF19/NR1H4                                                                                                                                                                                                                                                                                                                                                                                                                                                                          | 258 |
| GO:0010033 | response to organic substance | 137/590 | 2687/17046 | 9.71E-07 | 0.00049  | 0.00043  | CDKN1C/SPON2/GJB6/TMED10/LECT1/CHI3L1/ERLIN2/CHRNA1/CHRNA2/AP3S1/CCR1/CNP/ADM/IL31RA/CP51/CYP11A1/DDOST/ZNF366/BHLHA15/ABAT/AGXT/EIF4G1/ESR1/FGA/FGF10/SBNO2/FOX2/AKR1B1/MCL1/NUP210/NEDD4L/ARHGEF18/STEAP2/GATM/FGF22/NPTN/BMP10/FFAR2/GRB10/GUCY1A3/HAS1/HLA-DPA1/NR4A1/HRH1/HSPA1L/HSP90AB1/HTR3A/IGF2/IL1R1/IL1RN/IL10RA/IL11RA/IL12RB2/IL15RA/INHBA/IRF1/AQP9/ITIH4/JUP/KCNJ8/KDR/IPO5/HES5/AFF3/ARHGDA/LGALS9/LHCGR/LMNA/LMO2/MOV10/ATP1A2/NPPC/NRAS/OAS2/OPRL1/P2RY6/IL21R/PARK2/PITX2/PKM/PRKAG3/PML/TLR9/SSH1/PPP1CB/CHRNA9/PRKAR1B/LMBRD1/MAPK3/MAP2K2/HTRA1/RGMA/PSMD7/PTGFR/PLEKHG5/PTPRE/RIT2/BGLAP/CCL11/NOD2/BMP4/SLC8A1/SLC9A3/BMPR1B/STAT2/BST2/ZEB1/TFNIP3/TNFRSF1A/CCR2/TNFRSF4/WNT10B/CACNA1E/RAB7A/CARD14/ZC3H12A/CPEB4/CALR/NROB2/CASQ1/TRIM63/RAE1/IFITM1/RUNX1/RUNX3/IRS2/TNFRSF11A/ALDH1A2/SPHK1/HSPB3/CCR2/RSAD2/ADIPOQ/NUP93/RAPGEF2/FGF19/NR1H4                                                                                                                                                                                                                                                                                                                                                                                                                                                                                                                                                                                                                                                                                                                                                                                                                                                                                                                                                                                                                                                                                                                                                                                                                                                                        | 137 |
| GO:0007165 | signal transduction           | 233/590 | 5179/17046 | 1.03E-06 | 0.00049  | 0.00043  | AKT3/ABI1/TANK/FARP1/KLRG1/RCAN2/CDKN1C/MRV1/PDPN/LECT1/ESM1/CHI3L1/ERLIN2/EGLN2/PDAP1/CHRNA1/CHRNA2/SORCS1/AP3S1/CCR1/SEZ6/TNFAIP8L1/MAP3K8/ADM/IL31RA/OR2A14/CRABP1/MIB2/MPP7/SGOL1/PPM1/CYLD/DBB1/ZNF366/BHLHA15/DMBT1/DNA/AGXT/EFNA2/EIF4G1/A2M/EPHA1/ESR1/SPATA13/FCGR2A/FGA/FGF10/FHIT/FOX1L/FOX2/AKR1B1/RHOBTB2/NUP210/NEDD4L/PSD3/PPP1R13B/PUM2/ARHGEF18/MAPK8IP2/TSSK2/RASGEF1C/ALS2CL/ACOT11/PLEK2/ADGRF1/RPS6KC1/FGF22/NPTN/PDE7B/CYTH4/BMP10/GPR26/FFAR2/GRB10/GRIK4/GUCY1A3/GPR132/SOX8/HLA-DOA/HLA-DPA1/NR4A1/HRH1/HSPA1L/HSP90AB1/HTR3A/RSPO2/IGF1/IGF2/GPR142/IL1R1/IL1RN/IL10RA/IL11RA/IL12RB2/IL15RA/INHBA/IRF1/ITGA7/ITGB2/ITGB7/JUP/CD82/KCNH2/KDR/HES5/STMN1/OR2A5/LCP1/LDLR/ARHGDA/LGALS9/LHCGR/LMNA/RAB19/MC2R/MCC/MFNG/SCGB2A1/MITF/MOV10/PLEKHG7/ATP1A2/NFATC3/NPPC/NRAS/OAS2/OPRL1/OR2C1/OR3A2/P2RY6/IL21R/PARK2/SPOCK3/PDE6B/PITX2/PKHD1/PLA2G2A/PRKAG3/PML/GPR84/PNLIP/TLR9/TREM1/RIN2/APBB1IP/PPP1CB/MOB1A/CHRNA9/PRKAR1B/IFT122/MCTP2/LMBRD1/PAG1/WSB2/MAPK3/MAP2K2/PRKRIR/HTRA1/CDC42SE1/PAK6/ARNTL2/RGMA/PSMD7/PTGFR/PLEKHG5/TENM2/PTPRE/RGR/RGS12/RIT2/CCL11/NOD2/STRA6/ARHGAP9/TMEM237/BMP4/SLC8A1/BMPR1B/BOK/STAT2/STK3/BST2/ZEB1/TFNIP3/TNFRSF1A/TRAFA5/CCR2/TNFRSF4/WNT10B/ZAP70/CA7/CACNA1E/RAB7A/CARD14/BCL2L14/GPR157/CPEB4/C6orf25/CALR/ANTXR1/CMAHP/NROB2/CASQ1/TRIM63/RAE1/IFITM1/CDK10/RUNX1/TP63/RUNX3/IRS2/CRADD/TNFRSF11A/ALDH1A2/SPHK1/SKAP2/TSPAN18/CCR2/PRC1/STARD13/PIAS2/MAP3K6/RSAD2/AURKB/DAPL1/CD8A/TRIP10/ADIPOQ/RAB36/NUP93/RAPGEF2/CD79A/IQSEC1/FGF19/NR1H4                                                                                                                                                                                                                                                                                                                                                                                                                                                                                                                                                                                                                              | 233 |

|            |                                         |         |            |          |         |         |                                                                                                                                                                                                                                                                                                                                                                                                                                                                                                                                                                                                                                                                                                                                                                                                                                                                                                                                                                                                                                                                                                                                                                                                                                                                                                                                                                                                                                                                                                                                                                                                                                                                                                                                                                                           |     |
|------------|-----------------------------------------|---------|------------|----------|---------|---------|-------------------------------------------------------------------------------------------------------------------------------------------------------------------------------------------------------------------------------------------------------------------------------------------------------------------------------------------------------------------------------------------------------------------------------------------------------------------------------------------------------------------------------------------------------------------------------------------------------------------------------------------------------------------------------------------------------------------------------------------------------------------------------------------------------------------------------------------------------------------------------------------------------------------------------------------------------------------------------------------------------------------------------------------------------------------------------------------------------------------------------------------------------------------------------------------------------------------------------------------------------------------------------------------------------------------------------------------------------------------------------------------------------------------------------------------------------------------------------------------------------------------------------------------------------------------------------------------------------------------------------------------------------------------------------------------------------------------------------------------------------------------------------------------|-----|
| GO:0044700 | single organism signaling               | 249/590 | 5624/17046 | 1.22E-06 | 0.00052 | 0.00045 | AKT3/ABI1/TANK/FARP1/KLRG1/RCAN2/CDKN1C/MRV1/TRDN/PDPN/LECT1/ESM1/CHI3L1/ERLIN2/EGLN2/PDAP1/CHRNA1/CHRNA2/SORCS1/PANX3/AP3S1/CCR1/SEZ6/TNFAIP8/L1/CNP/MAP3K8/ADM/IL31RA/OR2A14/CRABP1/MIB2/MPP7/SGOL1/PPM1L/CYLD/DBB1/ZNF366/BHLHA15/DLG2/DMBT1/ABAT/DTNA/AGXT/EFNA2/EIF4G1/A2M/EPHA1/ESR1/SPATA13/FCGR2A/FGA/FGF10/FHIT/FOXL1/FOXC2/AKR1B1/NFASC/RHOBTB2/NUP210/NEDD4L/PSD3/PPP1R13B/PUM2/ARHGFE18/MAPK8IP2/TSSK2/RASGEF1C/ALS2CL/PNKD/A/COT11/PLEK2/ADGRF1/RPS6KC1/FGF22/NPTN/PDE7B/CYTH4/BMP10/GPR26/FFAR2/GRB10/GRIK4/GUCY1A3/GPR132/SOX8/HLA-DOA/HLA-DPA1/NR4A1/HRH1/HSP90AB1/HTR3A/RSPO2/IGF1/IGF2/GPR142/IL1R1/IL1RN/IL10RA/IL11RA/IL12RB2/IL15RA/INHBA/IRF1/ITGA7/ITGB2/ITGB7/JUP/CD82/KCNH2/KCNJ8/KCNJ9/KCNMB1/KDR/HES5/STMN1/OR2A5/LCP1/LDLR/ARHGDI1/LGALS9/LHCGR/LMNA/RAB19/MC2R/MCC/MFNG/SCGB2A1/MITF/MOV10/MPZ/PLEKHG7/ATP1A2/NFATC3/NPPC/NRAS/OAS2/OPRL1/OR2C1/OR3A2/P2RY6/IL21R/PARK2/SPOCK3/PDE6B/PITX2/PKHD1/PLA2G2A/PRKAG3/PML/GPR84/PNLIP/TLR9/TREM1/RIN2/APBB1P/PPP1CB/MOB1A/CHRNA9/PRKAR1B/IFT122/MCTP2/LMBRD1/PAG1/WSB2/MAPK3/MAP2K2/PRKRIR/HTRA1/CDC42SE1/PAK6/RGMA/PSMD7/PTGFR/PLEKHG5/TENM2/PTPRE/RGR/RGS12/RIT2/SCT/CCL11/NOD2/STRA6/ARHGAP9/TMEM237/BMP4/SLC6A12/SLC8A1/BMPR1B/BOK/STAT2/STK3/BST2/ZEB1/TEAD3/TGM2/TNFAIP3/TNFRSF1A/TRAFF5/CCR2/TNFRSF4/WNT10B/ZAP70/CA7/CACNA1E/RAB7A/CARD14/BCL2L14/GPR157/CPEB4/C6orf25/CALR/ANTXR1/CMAHP/NROB2/CASQ1/TRIM63/RAE1/IFITM1/CDK10/RUNX1/TP63/RUNX3/IRS2/CRADD/TNFRSF11A/ALDH1A2/SPHK1/SKAP2/TSPAN18/CCRL2/PRC1/STARD13/PIAS2/MAP3K6/SYT7/RSAD2/AURKB/DAPL1/CD8A/TRIP10/ADIPOQ/RAB36/NUP93/RAPGEF2/CD79A/IQSEC1/FGF19/NR1H4                                                                                                                                                                                     | 249 |
| GO:0023052 | signaling                               | 249/590 | 5629/17046 | 1.32E-06 | 0.00052 | 0.00045 | AKT3/ABI1/TANK/FARP1/KLRG1/RCAN2/CDKN1C/MRV1/TRDN/PDPN/LECT1/ESM1/CHI3L1/ERLIN2/EGLN2/PDAP1/CHRNA1/CHRNA2/SORCS1/PANX3/AP3S1/CCR1/SEZ6/TNFAIP8/L1/CNP/MAP3K8/ADM/IL31RA/OR2A14/CRABP1/MIB2/MPP7/SGOL1/PPM1L/CYLD/DBB1/ZNF366/BHLHA15/DLG2/DMBT1/ABAT/DTNA/AGXT/EFNA2/EIF4G1/A2M/EPHA1/ESR1/SPATA13/FCGR2A/FGA/FGF10/FHIT/FOXL1/FOXC2/AKR1B1/NFASC/RHOBTB2/NUP210/NEDD4L/PSD3/PPP1R13B/PUM2/ARHGFE18/MAPK8IP2/TSSK2/RASGEF1C/ALS2CL/PNKD/A/COT11/PLEK2/ADGRF1/RPS6KC1/FGF22/NPTN/PDE7B/CYTH4/BMP10/GPR26/FFAR2/GRB10/GRIK4/GUCY1A3/GPR132/SOX8/HLA-DOA/HLA-DPA1/NR4A1/HRH1/HSP90AB1/HTR3A/RSPO2/IGF1/IGF2/GPR142/IL1R1/IL1RN/IL10RA/IL11RA/IL12RB2/IL15RA/INHBA/IRF1/ITGA7/ITGB2/ITGB7/JUP/CD82/KCNH2/KCNJ8/KCNJ9/KCNMB1/KDR/HES5/STMN1/OR2A5/LCP1/LDLR/ARHGDI1/LGALS9/LHCGR/LMNA/RAB19/MC2R/MCC/MFNG/SCGB2A1/MITF/MOV10/MPZ/PLEKHG7/ATP1A2/NFATC3/NPPC/NRAS/OAS2/OPRL1/OR2C1/OR3A2/P2RY6/IL21R/PARK2/SPOCK3/PDE6B/PITX2/PKHD1/PLA2G2A/PRKAG3/PML/GPR84/PNLIP/TLR9/TREM1/RIN2/APBB1P/PPP1CB/MOB1A/CHRNA9/PRKAR1B/IFT122/MCTP2/LMBRD1/PAG1/WSB2/MAPK3/MAP2K2/PRKRIR/HTRA1/CDC42SE1/PAK6/RGMA/PSMD7/PTGFR/PLEKHG5/TENM2/PTPRE/RGR/RGS12/RIT2/SCT/CCL11/NOD2/STRA6/ARHGAP9/TMEM237/BMP4/SLC6A12/SLC8A1/BMPR1B/BOK/STAT2/STK3/BST2/ZEB1/TEAD3/TGM2/TNFAIP3/TNFRSF1A/TRAFF5/CCR2/TNFRSF4/WNT10B/ZAP70/CA7/CACNA1E/RAB7A/CARD14/BCL2L14/GPR157/CPEB4/C6orf25/CALR/ANTXR1/CMAHP/NROB2/CASQ1/TRIM63/RAE1/IFITM1/CDK10/RUNX1/TP63/RUNX3/IRS2/CRADD/TNFRSF11A/ALDH1A2/SPHK1/SKAP2/TSPAN18/CCRL2/PRC1/STARD13/PIAS2/MAP3K6/SYT7/RSAD2/AURKB/DAPL1/CD8A/TRIP10/ADIPOQ/RAB36/NUP93/RAPGEF2/CD79A/IQSEC1/FGF19/NR1H4                                                                                                                                                                                     | 249 |
| GO:0051716 | cellular response to stimulus           | 277/590 | 6405/17046 | 1.40E-06 | 0.00052 | 0.00045 | AKT3/ABI1/TANK/FARP1/KLRG1/RCAN2/CDKN1C/MRV1/SPON2/PDPN/GJB6/LECT1/ESM1/CHGA/CHI3L1/ERLIN2/EGLN2/TP53TG1/PDAP1/CHRNA1/CHRNA2/SORCS1/AP3S1/CCR1/SEZ6/TNFAIP8/L1/MAP3K8/ADM/IL31RA/HUS1B/OR2A14/CP51/CRABP1/MIB2/PARP4/MPP7/SGOL1/PPM1L/CYLD/ESCO2/CYP11A1/DBB1/ZNF366/BHLHA15/DMBT1/DTNA/AGXT/EFNA2/EIF4G1/A2M/EPHA1/ESR1/SPATA13/FCGR2A/FGA/FGF10/FHIT/SBNO2/FOXL1/FOXC2/AKR1B1/MCL1/RHOBTB2/NUP210/NEDD4L/PSD3/PPP1R13B/PUM2/ARHGFE18/MAPK8IP2/TSSK2/SLC37A4/RASGEF1C/ALS2CL/ACOT11/PLEK2/ADGRF1/RPS6KC1/DNAJC2/FGF22/NPTN/PDE7B/CYTH4/BMP10/GPR26/FFAR2/GRB10/GRIK4/DNAJC15/GUCY1A3/GPR132/HAS1/SOX8/HK1/HLA-DOA/HLA-DPA1/NR4A1/HRH1/HSPA1L/HSP90AB1/HTR3A/RSPO2/IGF1/IGF2/GPR142/LCE1D/IL1R1/IL1RN/IL10RA/AQP2/IL11RA/IL12RB2/IL15RA/IL16/INHBA/IRF1/AQP9/ITGA7/ITGB2/ITGB7/JUP/CD82/KCNH2/KDR/IPO5/HES5/STMN1/OR2A5/LCP1/LDLR/ARHGDI1/LGALS9/LHCGR/LMNA/LMO2/RAB19/MC2R/MCC/MFNG/SCGB2A1/MITF/ASGR1/MOV10/PLEKHG7/ATP1A2/NFATC3/NPPC/NRAS/OAS2/OPRL1/OR2C1/OR3A2/P2RY6/IL21R/PARK2/SPOCK3/C11orf73/SIRT6/PDE6B/PITX2/PKHD1/PLA2G2A/PRKAG3/PML/GPR84/PNLIP/TLR9/TREM1/SSH1/RIN2/APBB1P/CYP2W1/PPP1CB/FANCI/MOB1A/CHRNA9/PARVA/PRKAR1B/IFT122/MCTP2/LMBRD1/PAG1/WSB2/MAPK3/MAP2K2/PRKRIR/HTRA1/SLAMF8/CDC42SE1/PAK6/RGMA/PSMD7/PTGFR/PLEKHG5/TENM2/PTPRE/RFC2/RGR/RGS12/RIT2/RPA3/BGLAP/CCL11/NOD2/STRA6/ARHGAP9/TMEM237/VPS33A/BMP4/SLC8A1/BMPR1B/BOK/STAT2/STK3/BST2/TCEB2/ZEB1/TEAD3/TGM2/TNFAIP3/TNFRSF1A/TRAFF5/TRPC6/CCR2/TNFRSF4/WNT10B/ZAP70/CA7/CACNA1E/RAB7A/CARD14/BCL2L14/GPR157/ZC3H12A/FAAP100/CPEB4/C6orf25/EEDP1/CALR/ANTXR1/CMAHP/NROB2/CASQ1/TRIM63/RAE1/IFITM1/CDK10/RUNX1/TP63/RUNX3/IRS2/CRADD/TNFRSF11A/ALDH1A2/SPHK1/SKAP2/STBD1/TSPAN18/CCRL2/PRC1/STARD13/PIAS2/MAP3K6/RSAD2/AURKB/DAPL1/CD8A/TRIP10/ADIPOQ/RAB36/N4BP1/NUP93/RAPGEF2/CD79A/IQSEC1/FGF19/NR1H4 | 277 |
| GO:0071310 | cellular response to organic substance  | 110/590 | 2092/17046 | 3.83E-06 | 0.00133 | 0.00116 | CDKN1C/SPON2/GJB6/LECT1/CHI3L1/AP3S1/CCR1/IL31RA/CP51/CYP11A1/BHLHA15/EIF4G1/ESR1/FGA/FGF10/SBNO2/FOXC2/AKR1B1/MCL1/NUP210/NEDD4L/ARHGFE18/FGF22/NPTN/BMP10/FFAR2/GRB10/HAS1/HLA-DPA1/NR4A1/HRH1/HSP90AB1/HTR3A/IGF2/IL1R1/IL1RN/IL10RA/IL11RA/IL12RB2/IL15RA/INHBA/IRF1/AQP9/JUP/KDR/IPO5/HES5/ARHGDI1/LGALS9/LHCGR/LMNA/LMO2/MOV10/ATP1A2/NRAS/OAS2/P2RY6/IL21R/PARK2/PRKAG3/PML/TLR9/SSH1/PPP1CB/PRKAR1B/LMBRD1/MAPK3/MAP2K2/HTRA1/RGMA/PSMD7/PTGFR/PLEKHG5/PTPRE/RIT2/BGLAP/CCL11/NOD2/BMP4/SLC8A1/BMPR1B/STAT2/BST2/ZEB1/TNFAIP3/TNFRSF1A/CCR2/TNFRSF4/WNT10B/CACNA1E/CARD14/ZC3H12A/CPEB4/CALR/NROB2/TRIM63/RAE1/IFITM1/RUNX1/IRS2/TNFRSF11A/ALDH1A2/SPHK1/CCRL2/RSAD2/ADIPOQ/NUP93/RAPGEF2/FGF19/NR1H4                                                                                                                                                                                                                                                                                                                                                                                                                                                                                                                                                                                                                                                                                                                                                                                                                                                                                                                                                                                                                                                                             | 110 |
| GO:0007166 | cell surface receptor signaling pathway | 126/590 | 2511/17046 | 6.86E-06 | 0.00224 | 0.00194 | ABI1/KLRG1/RCAN2/CDKN1C/LECT1/ESM1/AP3S1/CCR1/IL31RA/MIB2/PPM1L/CYLD/DBB1/AGXT/EFNA2/EIF4G1/EPHA1/FCGR2A/FGA/FGF10/FOX1L/FOXC2/NUP210/NEDD4L/ARHGFE18/MAPK8IP2/ADGRF1/FGF22/NPTN/BMP10/FFAR2/GRB10/GRIK4/HLA-DPA1/NR4A1/HSP90AB1/RSPO2/IGF1/IGF2/IL1R1/IL1RN/IL10RA/IL11RA/IL12RB2/IL15RA/INHBA/IRF1/ITGA7/ITGB2/ITGB7/JUP/CD82/KDR/HES5/ARHGDI1/LMNA/MCC/MFNG/MITF/MOV10/NFATC3/NPPC/NRAS/OAS2/P2RY6/IL21R/PARK2/PITX2/PRKAG3/PML/TLR9/PPP1CB/PRKAR1B/IFT122/LMBRD1/PAG1/MAPK3/MAP2K2/HTRA1/RGMA/PSMD7/PLEKHG5/PTPRE/RIT2/CCL11/NOD2/TMEM237/BMP4/BMPR1B/BOK/STAT2/STK3/BST2/ZEB1/TNFAIP3/TNFRSF1A/CCR2/TNFRSF4/WNT10B/ZAP70/RAB7A/CARD14/BCL2L14/GPR157/CPEB4/C6orf25/CMAHP/NROB2/RAE1/IFITM1/TP63/RUNX3/IRS2/CRADD/TNFRSF11A/SPHK1/TSPAN18/CCRL2/RSAD2/CD8A/ADIPOQ/NUP93/RAPGEF2/CD79A/FGF19/NR1H4                                                                                                                                                                                                                                                                                                                                                                                                                                                                                                                                                                                                                                                                                                                                                                                                                                                                                                                                                                                     | 126 |

|            |                                       |         |            |          |         |         |                                                                                                                                                                                                                                                                                                                                                                                                                                                                                                                                                                                                                                                                                                                                                                                                                                                                                                                                                                                                                                                                                                                                                                                                                                                                                                                                                                                                                                                 |     |
|------------|---------------------------------------|---------|------------|----------|---------|---------|-------------------------------------------------------------------------------------------------------------------------------------------------------------------------------------------------------------------------------------------------------------------------------------------------------------------------------------------------------------------------------------------------------------------------------------------------------------------------------------------------------------------------------------------------------------------------------------------------------------------------------------------------------------------------------------------------------------------------------------------------------------------------------------------------------------------------------------------------------------------------------------------------------------------------------------------------------------------------------------------------------------------------------------------------------------------------------------------------------------------------------------------------------------------------------------------------------------------------------------------------------------------------------------------------------------------------------------------------------------------------------------------------------------------------------------------------|-----|
| GO:0009605 | response to external stimulus         | 120/590 | 2366/17046 | 7.30E-06 | 0.00224 | 0.00194 | SPON2/GJB6/HNRNPUL1/CHGA/CHI3L1/CCR1/CNP/COL9A3/ADM/CPS1/CYP11A1/BHLHA15/DMBT1/EFNA2/A2M/ANKRD23/EPHA1/F11/FGA/FGF10/SBNO2/NFASC/PUM2/SLC37A4/FBXL21/GATM/FGF22/FFAR2/DNAJC15/GUCY1A3/HK1/NR4A1/HRH1/HSP90AB1/IL1R1/IL1RN/IL10RA/AQP2/IL12RB2/IL16/IRF1/ITGB2/JUP/KCNJ8/KDR/STMN1/LDLR/LGALS9/ASGR1/ATP1A2/NRAS/OAS2/PARK2/SIRT6/PDE6B/ATP8A2/PITX2/PKM/PLA2G2A/PRKAG3/PML/PNLP/TLR9/TREM1/PPP1CB/CHRNA9/PARVA/MAPK3/MAP2K2/PROC/HTRA1/SLAMF8/ARNTL2/RGMA/PSMD7/PTGFR/PLEKHG5/TENM2/CREBZF/ACTA2/RGR/BGLAP/CCL11/NPAS3/NOD2/STRA6/VPS33A/BMP4/SLC8A1/BMPR1B/SLIT1/BPI/STAT2/BST2/TNFAIP3/TNFRSF1A/TRPC6/CCR2/CA7/RAB7A/ZC3H12A/CPEB4/CALR/HOPX/IFITM1/RUNX3/IRS2/CRADD/TNFRSF11A/ALDH1A2/STBD1/CCR2/RSAD2/DAPL1/CD8A/ADIPOQ/NUP93/RAPGEF2/FGF19/NR1H4                                                                                                                                                                                                                                                                                                                                                                                                                                                                                                                                                                                                                                                                                           | 120 |
| GO:0048869 | cellular developmental process        | 172/590 | 3716/17046 | 1.25E-05 | 0.00362 | 0.00314 | ABI1/FARP1/CDKN1C/SPEG/SPON2/TACC2/PDPN/CELF1/LECT1/GPRIN1/CLN5/CCR1/SEZ6/CNP/COL9A3/ADM/IL31RA/CPS1/FAM101A/CSTA/SMYD1/SH3D19/CYLD/ESCO2/CYP11A1/BHLHA15/DMBT1/EEF2/EFNA2/EIF4G1/A2M/ELK4/EPHA1/ESR1/FGA/FGF10/BTBD3/SBNO2/FOX11/FOXC2/EXPH5/NFASC/EPB41L3/FLOT2/NEDD4L/SYNE1/PSD3/ARHGFE18/MAPK8IP2/TSSK2/DFNB31/GAS2/LCE2B/FGF22/NPTN/BMP10/FFAR2/TMOD4/SOX8/HLA-DOA/ANXA13/NR4A1/HSP90AB1/ID3/RSPO2/IGF1/IGF2/LCE1C/LCE1D/LCE2D/FOXK2/INHBA/IRF1/ITGA7/ITGB2/ITGB7/IVL/JUP/KDR/HES5/LAMA3/STMN1/ARHGDI2/LGALS9/LMNA/MITF/LHX8/MYL2/NEU1/NFATC3/NHLH2/NPPC/NRAS/ATP5B/PARK2/SIRT6/ATP8A2/PITX2/PKHD1/PLA2G2A/PLAGL1/PML/SSH1/MXRA8/FBLIM1/PALMD/HERC6/ELP3/PARVA/IFT122/MAPK3/MAP2K2/MRAP/HTRA1/CDC42SE1/RGMA/PSMD7/TENM2/ERMN/RDH14/ACTA2/BGLAP/CCL11/DNAI2/TMEM237/VPS33A/BMP4/SLC8A1/BMPR1B/SLIT1/BOK/STK3/SUPT6H/ZEB1/TEAD3/TCHH/TNFRSF1A/TRPC6/UCP1/WNT10B/ZAP70/LST1/ZC3H12A/C6orf25/CALR/SLIRP/CAST/CAPZB/SPATA16/ANTXR1/BFSP2/CASQ1/HOPX/TTBK1/IFITM1/SCIN/RUNX1/TP63/RUNX3/IRS2/ACTN1/TNFRSF11A/ALDH1A2/PIAS2/CBFA2T2/RSAD2/DAPL1/CD8A/ADIPOQ/RAPGEF2/CD79A/FGF19                                                                                                                                                                                                                                                                                                                                                                   | 172 |
| GO:0048513 | organ development                     | 138/590 | 2848/17046 | 1.37E-05 | 0.00376 | 0.00326 | ABI1/CDKN1C/SPEG/TACC2/PDPN/GJB6/TMED10/LECT1/CHI3L1/CHRNA1/CLN5/CCR1/SEZ6/CNP/COL9A3/COMP/ADM/IL31RA/CPS1/FAM101A/CSTA/SMYD1/CYLD/ESCO2/CYP11A1/BHLHA15/DMBT1/EEF2/EFNA2/EIF4G1/A2M/ELK4/EPHA1/ESR1/FGA/FGF10/BTBD3/SBNO2/FOX11/FOXC2/EXPH5/AKR1B1/VGLL2/DFNB31/LCE2B/GATM/BMP10/SOX8/HLA-DOA/ACACB/HOXC4/HSD11B1/HSP90AB1/ID3/RSPO2/IGF1/IGF2/LCE1C/LCE1D/LCE2D/AQP2/AQP5/INHBA/IRF1/ITGA7/IVL/JUP/KCNJ8/KDR/AMIGO3/HES5/STMN1/LGALS9/LHCGR/LMNA/LMO2/MC2R/MITF/LHX8/MYL2/NFATC3/NPPC/NRAS/C11orf73/SIRT6/PDE6B/ATP8A2/PITX2/PKHD1/PKM/PLAGL1/PML/RIPPLY3/HERC6/CHRNA9/PARVA/IFT122/CSGALNACT1/MAPK3/MAP2K2/HTRA1/ACTA2/BGLAP/SCT/CCL11/STRA6/GZF1/VPS33A/BMP4/SLC8A1/BMPR1B/SLIT1/BOK/STK3/ZEB1/TGM2/TCHH/TNFAIP3/WNT10B/ZAP70/C6orf25/CALR/CAST/BFSP2/NROB2/CASQ1/HOPX/TTBK1/SCIN/RUNX1/TP63/RUNX3/IRS2/ACTN1/TNFRSF11A/ALDH1A2/SPHK1/RSAD2/CD8A/ADIPOQ/MICAL2/RAPGEF2/CD79A/FGF19                                                                                                                                                                                                                                                                                                                                                                                                                                                                                                                                                          | 138 |
| GO:0034113 | heterotypic cell-cell adhesion        | 9/590   | 44/17046   | 1.61E-05 | 0.0042  | 0.00364 | FGA/NFASC/IL1RN/ITGA7/ITGB2/ITGB7/JUP/PARVA/ADIPOQ                                                                                                                                                                                                                                                                                                                                                                                                                                                                                                                                                                                                                                                                                                                                                                                                                                                                                                                                                                                                                                                                                                                                                                                                                                                                                                                                                                                              | 9   |
| GO:0032502 | developmental process                 | 231/590 | 5327/17046 | 2.10E-05 | 0.00518 | 0.00449 | ABI1/FARP1/CDKN1C/SPEG/SPON2/TACC2/PDPN/CELF1/GJB6/TMED10/LECT1/ESM1/CHI3L1/CHRNA1/GPRIN1/FAT3/CLN5/CCR1/SEZ6/CNP/COL9A3/COMP/ADM/IL31RA/CPM/CP51/CRABP1/ZNF358/FAM101A/CSTA/SMYD1/SH3D19/CYLD/ESCO2/CYP11A1/BHLHA15/DIO3/DLG2/DMBT1/EEF2/EFNA2/EIF4G1/A2M/ELK4/EPHA1/ESR1/FGA/FGF10/BTBD3/SBNO2/FOX11/FOXC2/EXPH5/AKR1B1/NFASC/EPB41L3/DIP2A/FLOT2/NEDD4L/SYNE1/PSD3/ARHGFE18/RYPB/MORC3/MAPK8IP2/TSSK2/VGLL2/DFNB31/GAS2/LCE2B/GATM/FGF22/NPTN/BMP10/FFAR2/TMOD4/SOX8/HLA-DOA/ANXA13/NR4A1/ACACB/HOXC4/HSD11B1/HSP90AB1/TFAP2E/ID3/RSPO2/IGF1/IGF2/LCE1C/LCE1D/LCE2D/IL1RN/AQP2/IL11RA/FOXK2/AQP5/INHBA/IRF1/ITGA7/ITGB2/ITGB7/IVL/JUP/KCNJ8/KDR/AMIGO3/HES5/AFF3/LAMA3/STMN1/ARHGDI2/LGALS9/LHCGR/LMNA/LMO2/MC2R/MFNG/MGAT1/MITF/LHX8/MYL2/DRG1/NEU1/NFATC3/NHLH2/NPPC/NRAS/ATP5B/PARK2/UTP11L/C11orf73/SIRT6/PDE6B/ATP8A2/PITX2/PKHD1/PKM/PLA2G2A/PLAGL1/PML/RIPPLY3/SSH1/MXRA8/FBLIM1/PALMD/BANP/HERC6/ELP3/CHRNA9/PARVA/IFT122/ERMARD/MCTP2/CSGALNACT1/MAPK3/MAP2K2/MRAP/HTRA1/CDC42SE1/RGMA/PSMD7/TENM2/ERMN/RDH14/MARK4/ACTA2/BGLAP/SCT/CCL11/NPAS3/STRA6/GZF1/DNAI2/TMEM237/VPS33A/BMP4/SLC8A1/BMPR1B/SLIT1/BOK/STK3/SUPT6H/BST2/ZEB1/TEAD3/TGM2/TCHH/TNFAIP3/TNFRSF1A/TRPC6/CCR2/UCP1/WNT10B/ZAP70/ZNF7/LST1/ZC3H12A/C6orf25/CALR/SLIRP/CAST/CAPZB/SPATA16/ANTXR1/BFSP2/NROB2/CASQ1/HOPX/TTBK1/IFITM1/SCIN/RUNX1/TP63/RUNX3/IRS2/ACTN1/TNFRSF11A/ALDH1A2/SPHK1/PIAS2/CBFA2T2/RSAD2/AURKB/DAPL1/CD8A/ADIPOQ/MICAL2/RAPGEF2/CD79A/FGF19 | 231 |
| GO:0044767 | single-organism developmental process | 228/590 | 5251/17046 | 2.28E-05 | 0.00518 | 0.00449 | ABI1/FARP1/CDKN1C/SPEG/SPON2/TACC2/PDPN/CELF1/GJB6/TMED10/LECT1/ESM1/CHI3L1/CHRNA1/GPRIN1/FAT3/CLN5/CCR1/SEZ6/CNP/COL9A3/COMP/ADM/IL31RA/CPS1/CRABP1/ZNF358/FAM101A/CSTA/SMYD1/SH3D19/CYLD/ESCO2/CYP11A1/BHLHA15/DIO3/DLG2/DMBT1/EEF2/EFNA2/EIF4G1/A2M/ELK4/EPHA1/ESR1/FGA/FGF10/BTBD3/SBNO2/FOX11/FOXC2/EXPH5/AKR1B1/NFASC/EPB41L3/DIP2A/FLOT2/NEDD4L/SYNE1/PSD3/ARHGFE18/RYPB/MORC3/MAPK8IP2/TSSK2/VGLL2/DFNB31/GAS2/LCE2B/GATM/FGF22/NPTN/BMP10/FFAR2/TMOD4/SOX8/HLA-DOA/ANXA13/NR4A1/ACACB/HOXC4/HSD11B1/HSP90AB1/ID3/RSPO2/IGF1/IGF2/LCE1C/LCE1D/LCE2D/IL1RN/AQP2/IL11RA/FOXK2/AQP5/INHBA/IRF1/ITGA7/ITGB2/ITGB7/IVL/JUP/KCNJ8/KDR/AMIGO3/HES5/AFF3/LAMA3/STMN1/ARHGDI2/LGALS9/LHCGR/LMNA/LMO2/MC2R/MFNG/MGAT1/MITF/LHX8/MYL2/DRG1/NEU1/NFATC3/NHLH2/NPPC/NRAS/ATP5B/PARK2/UTP11L/C11orf73/SIRT6/PDE6B/ATP8A2/PITX2/PKHD1/PKM/PLA2G2A/PLAGL1/PML/RIPPLY3/SSH1/MXRA8/FBLIM1/PALMD/BANP/HERC6/ELP3/CHRNA9/PARVA/IFT122/ERMARD/MCTP2/CSGALNACT1/MAPK3/MAP2K2/MRAP/HTRA1/CDC42SE1/RGMA/PSMD7/TENM2/ERMN/RDH14/MARK4/ACTA2/BGLAP/SCT/CCL11/STRA6/GZF1/DNAI2/TMEM237/VPS33A/BMP4/SLC8A1/BMPR1B/SLIT1/BOK/STK3/SUPT6H/BST2/ZEB1/TEAD3/TGM2/TCHH/TNFAIP3/TNFRSF1A/TRPC6/CCR2/UCP1/WNT10B/ZAP70/ZNF7/LST1/ZC3H12A/C6orf25/CALR/SLIRP/CAST/CAPZB/SPATA16/ANTXR1/BFSP2/NROB2/CASQ1/HOPX/TTBK1/IFITM1/SCIN/RUNX1/TP63/RUNX3/IRS2/ACTN1/TNFRSF11A/ALDH1A2/SPHK1/PIAS2/CBFA2T2/RSAD2/AURKB/DAPL1/CD8A/ADIPOQ/MICAL2/RAPGEF2/CD79A/FGF19                  | 228 |

|            |                                           |         |            |          |         |         |                                                                                                                                                                                                                                                                                                                                                                                                                                                                                                                                                                                                                                                                                                                                                                                                                                                                                                                                                                                                                                                                                                                                                                                                                                                                                                                                                                     |     |
|------------|-------------------------------------------|---------|------------|----------|---------|---------|---------------------------------------------------------------------------------------------------------------------------------------------------------------------------------------------------------------------------------------------------------------------------------------------------------------------------------------------------------------------------------------------------------------------------------------------------------------------------------------------------------------------------------------------------------------------------------------------------------------------------------------------------------------------------------------------------------------------------------------------------------------------------------------------------------------------------------------------------------------------------------------------------------------------------------------------------------------------------------------------------------------------------------------------------------------------------------------------------------------------------------------------------------------------------------------------------------------------------------------------------------------------------------------------------------------------------------------------------------------------|-----|
| GO:0070887 | cellular response to chemical stimulus    | 124/590 | 2524/17046 | 2.28E-05 | 0.00518 | 0.00449 | CDKN1C/SPON2/GJB6/LECT1/CHGA/CHI3L1/EGLN2/AP351/CCR1/IL131RA/CPS1/CYP11A1/BHLHA15/EIF4G1/ESR1/FGA/FGF10/SBNO2/FOX2/AKR1B1/MLC1/NUP210/NEDD4L/ARHG18/FGF22/NPTN/BMP10/FFAR2/GRB10/HAS1/HLA-DPA1/NR4A1/HRH1/HSP90AB1/HTR3A/IGF2/LCE1D/IL1R1/IL1RN/IL10RA/AQP2/IL11RA/IL12RB2/IL15RA/IL16/INHBA/IRF1/AQP9/ITGB2/JUP/KCNH2/KDR/IPO5/HES5/ARHG18/LGALS9/LHCGR/LMNA/LMO2/MOV10/ATP1A2/NFATC3/NRAS/OAS2/P2RY6/IL12R/PARK2/PKAG3/PML/TLR9/TREM1/SSH1/CYP2W1/PPP1CB/PARVA/PRKAR1B/LMBRD1/MAPK3/MAP2K2/HTRA1/SLAMF8/RGMA/PSMD7/PTGFR/PLEKHG5/PTPRE/RIT2/BGLAP/CCL11/NOD2/BMP4/SLC8A1/BMPR1B/STAT2/BST2/TCEB2/ZEB1/TNFAIP3/TNFRSF1A/TRPC6/CCR2/TNFRSF4/WNT10B/CACNA1E/CARD14/ZC3H12A/CPEB4/CALR/NR0B2/TRIM63/RAE1/IFITM1/RUNX1/IRS2/TNFRSF11A/ALDH1A2/SPHK1/CCR2/RSAD2/ADIPOQ/NUP93/RAPGEF2/FGF19/NR1H4                                                                                                                                                                                                                                                                                                                                                                                                                                                                                                                                                                        | 124 |
| GO:0009628 | response to abiotic stimulus              | 63/590  | 1071/17046 | 2.48E-05 | 0.0053  | 0.0046  | GJB6/CHI3L1/EGLN2/ADM/CYP11A1/DDB1/ABAT/ANKRD23/AKR1B1/MLC1/NUP210/ACOT11/FBXL21/DNAJC2/HRH1/HSPA1L/HSP90AB1/IGF1/IL1R1/AQP2/IRF1/AQP9/IVL/JUP/KCNJ8/LDLR/LMNA/ATP1A2/NFATC3/NPPC/C11orf73/PDE6B/ATP8A2/PKM/PML/PNLIP/PPP1CB/CHRNA9/MAPK3/RGR/RPA3/BGLAP/SCT/CCL11/STRA6/BMP4/SLC8A1/TCEB2/TNFRSF1A/TRPC6/CACNA1E/CPEB4/CASQ1/TRIM63/RAE1/KMO/TP63/CRADD/TNFRSF11A/AURKB/ADIPOQ/N4BP1/NUP93                                                                                                                                                                                                                                                                                                                                                                                                                                                                                                                                                                                                                                                                                                                                                                                                                                                                                                                                                                         | 63  |
| GO:0048518 | positive regulation of biological process | 217/590 | 4960/17046 | 2.54E-05 | 0.0053  | 0.0046  | ABI1/TANK/FARP1/CDKN1C/TRDN/SPON2/PITRM1/PDPN/CELF1/RER1/ESM1/CHGA/CHI3L1/ERLUN2/EGLN2/CCR1/SLC51B/SEZ6/MAP3K8/ADM/IL131RA/EGFLAM/CPS1/MIB2/MPP7/SMYD1/SH3D19/CYLD/DDB1/BHLHA15/DIO3/DMBT1/ABAT/EEF2/EIF4G1/A2M/EPA1/ESR1/F11/SPATA13/FCGR2A/FGA/FGF10/SBNO2/FOX2/EXPH5/AKR1B1/GGA3/FLOT2/MLC1/TBC1D1/NEDD4L/PSD3/PUM2/ARHG18/MAPK8IP2/VGLL2/RASGEF1C/RNF144B/ALS2CL/PABPC1/DNAJC2/FGF22/NPTN/CYTH4/BMP10/GPR26/FFAR2/GRB10/DNAJC15/GUCY1A3/SOX8/HK1/HLA-DPA1/ANXA13/NR4A1/ACACB/AGFG2/HRH1/HSPA1L/HSP90AB1/TFAP2E/ID3/RSPO2/IGF1/IGF2/IL1RN/IL12RB2/IL16/FOXK2/INHBA/IRF1/ITGB2/JUP/KCNH2/KDR/IPO5/AMIGO3/HES5/STMN1/LCP1/LDLR/ARHG18/LGALS9/LHCGR/LMNA/LMO2/MC2R/MFNG/MITF/PLEKHG7/NEU1/NFATC3/NHLH2/NPPC/NRAS/OPRL1/P2RY6/PARK2/UTP11L/PRR16/SIRT6/ATP8A2/PITX2/PKHD1/PLA2G2A/PLAGL1/PML/PNLIP/TLR9/RIN2/APBB1IP/BANP/ELP3/GOLPH3/FANCI/PRKAR1B/PAG1/MAPK3/MAP2K2/MRAP/HTRA1/PAG6/ARNTL2/RGMA/PSMD7/PTGFR/PLEKHG5/TENM2/MARK4/ACTA2/TRIM27/RGS12/SCT/CCL11/NPAS3/NOD2/STRA6/ARHGAP9/BMP4/ZNF649/SLC8A1/BMPR1B/BOK/STK3/SUPT6H/BST2/TCEB2/ZEB1/TEAD3/TERF1/TGM2/TNFAIP3/TNFRSF1A/TRAFF5/TRPC6/CCR2/TNFRSF4/WNT10B/ZAP70/CA7/RAB7A/CARD14/BCL2L14/CSPP1/ZC3H12A/CALR/NR0B2/HOPX/IFITM1/SCIN/CDK10/RUNX1/TP63/RUNX3/IRS2/CRADD/TNFRSF11A/ALDH1A2/SPHK1/SKAP2/PRC1/STARD13/PIAS2/MAP3K6/SYT7/CBFA2T2/RSAD2/AURKB/CD8A/ADIPOQ/MICAL2/RAPGEF2/CD79A/IQSEC1/FGF19/NR1H4 | 217 |
| GO:0022610 | biological adhesion                       | 75/590  | 1348/17046 | 2.71E-05 | 0.00545 | 0.00473 | GNE/CDH9/CDH12/SPON2/PDPN/PKP3/FAT3/CCR1/COMP/MAP3K8/EGFLAM/CSTA/CYLD/DDOST/EPA1/FAT2/FGA/FOX2/NFASC/FLOT2/NPTN/CYTH4/BMP10/HAS1/HLA-DOA/HLA-DPA1/HSP90AB1/ZC3H12D/IGF1/IGF2/IL1RN/IRF1/ITGA7/ITGB2/ITGB7/JUP/KDR/AMIGO3/HES5/LAMA3/LCP1/ARHG18/LGALS9/LPP/NFATC3/ATP5B/PKHD1/PML/APBB1IP/FBLIM1/PPP1CB/PARVA/PAG1/PCDHGB3/SLURP1/TENM2/BGLAP/CCL11/PARVG/NOD2/TINAGL1/PCDH20/BMP4/ZEB1/TGM2/CCR2/TNFRSF4/ZAP70/CALR/ANTXR1/ACTN1/ESAM/RSAD2/CD8A/ADIPOQ                                                                                                                                                                                                                                                                                                                                                                                                                                                                                                                                                                                                                                                                                                                                                                                                                                                                                                            | 75  |
| GO:0065008 | regulation of biological quality          | 151/590 | 3225/17046 | 2.97E-05 | 0.00575 | 0.00499 | MRV1/TRDN/PDPN/GJB6/CHGA/EGLN2/CHRNA1/CHRNA2/CLN5/CCR1/SLC51B/SEZ6/CNP/ADM/IL131RA/CPS1/CRABP1/CYP11A1/DDB1/BHLHA15/DIO3/ABAT/A2M/ESR1/F11/FGA/FGF10/FOX2/AKR1B1/EPB41L3/FLOT2/NEDD4L/SYNE1/ARHG18/MORC3/MAPK8IP2/SLC37A4/DFNB31/STEAP2/GAS2/PABPC1/NPTN/AMPD3/GPR26/FFAR2/SCG3/TMOD4/GUCY1A3/SOX8/HK1/ACACB/HRH1/HSP90AB1/HTR3A/NME9/IGF1/IGF2/IL1R1/IL1RN/AQP2/AQP5/INHBA/IRF1/AQP9/ITGA7/ITGB2/JUP/KCNH2/KCNJ8/KCNMB1/KDR/AMIGO3/LDLR/LGALS9/MYL2/NUBP1/ATP1A2/NPPC/NRAS/OPRL1/ATP5B/ANO7/PARK2/PRR16/SIRT6/PDE6B/ATP8A2/PKHD1/PML/TLR9/TREM1/SSH1/APBB1IP/FBLIM1/PALMD/SLC30A10/CHRNA9/PARVA/PRKAR1B/MAPK3/PROC/SLAMF8/CDC42SE1/ERMN/RDH14/ACTA2/RFC2/TRIM27/RPA3/BGLAP/SCT/CCL11/ABHD4/NOD2/STRA6/BMP4/SLC4A1/SLC6A12/SLC8A1/SLC9A3/SLIT1/STK3/TERF1/TGM2/TNFAIP3/TRPC6/CCR2/WNT10B/CA7/CACNA1E/RAB7A/LST1/ZC3H12A/C6orf25/CALR/CAPZB/ATP13A4/NR0B2/CASQ1/TTBK1/SCIN/TP63/IRS2/ACTN1/TNFRSF11A/ALDH1A2/SYT7/ESAM/SLC16A3/ADIPOQ/RAPGEF2                                                                                                                                                                                                                                                                                                                                                                                                                        | 151 |
| GO:0061448 | connective tissue development             | 21/590  | 224/17046  | 3.54E-05 | 0.0066  | 0.00573 | LECT1/CHI3L1/COMP/FAM101A/FOX2/BMP10/SOX8/HOX4/RSPO2/IGF1/HES5/NPPC/CSGALNACT1/MAPK3/ACTA2/BMP4/BMPR1B/ZEB1/WNT10B/SCIN/RUNX3                                                                                                                                                                                                                                                                                                                                                                                                                                                                                                                                                                                                                                                                                                                                                                                                                                                                                                                                                                                                                                                                                                                                                                                                                                       | 21  |
| GO:0009653 | anatomical structure morphogenesis        | 125/590 | 2579/17046 | 3.93E-05 | 0.00707 | 0.00613 | ABI1/FARP1/CDKN1C/SPON2/PDPN/GJB6/LECT1/ESM1/CHI3L1/CNP/COL9A3/COMP/ADM/CPM/ZNF358/FAM101A/SH3D19/CYLD/EFNA2/EPA1/ESR1/FGA/FGF10/BTBD3/SBNO2/FOX1/FOX2/NFASC/EPB41L3/NEDD4L/ARHG18/MAPK8IP2/GAS2/FGF22/BMP10/TMOD4/SOX8/NR4A1/HOX4/HSP90AB1/ID3/RSPO2/IGF1/IGF2/IL1RN/FOXK2/AQP5/INHBA/ITGA7/ITGB2/ITGB7/KDR/HES5/AFF3/LAMA3/STMN1/ARHG18/LHX8/MYL2/NFATC3/NPPC/NRAS/ATP5B/PARK2/SIRT6/ATP8A2/PITX2/PKHD1/PML/SSH1/FBLIM1/PALMD/CHRNA9/PARVA/IFIT122/CSGALNACT1/MAPK3/MAP2K2/HTRA1/CDC42SE1/RGMA/PSMD7/TENM2/ERMN/ACTA2/BGLAP/CCL11/STRA6/GZF1/DNAI2/TMEM237/VPS33A/BMP4/SLC8A1/BMPR1B/SLIT1/STK3/ZEB1/TGM2/TNFAIP3/TRPC6/CCR2/WNT10B/LST1/ZC3H12A/C6orf25/CALR/SLIRP/CAST/CAPZB/ANTXR1/CASQ1/HOPX/TTBK1/RUNX1/TP63/RUNX3/IRS2/ACTN1/ALDH1A2/SPHK1/ADIPOQ/MICAL2/RAPGEF2/FGF19                                                                                                                                                                                                                                                                                                                                                                                                                                                                                                                                                                                      | 125 |
| GO:0007155 | cell adhesion                             | 74/590  | 1343/17046 | 4.25E-05 | 0.00728 | 0.00632 | GNE/CDH9/CDH12/SPON2/PDPN/PKP3/FAT3/CCR1/COMP/MAP3K8/EGFLAM/CSTA/CYLD/DDOST/EPA1/FAT2/FGA/FOX2/NFASC/FLOT2/NPTN/CYTH4/BMP10/HAS1/HLA-DOA/HLA-DPA1/ZC3H12D/IGF1/IGF2/IL1RN/IRF1/ITGA7/ITGB2/ITGB7/JUP/KDR/AMIGO3/HES5/LAMA3/LCP1/ARHG18/LGALS9/LPP/NFATC3/ATP5B/PKHD1/PML/APBB1IP/FBLIM1/PPP1CB/PARVA/PAG1/PCDHGB3/SLURP1/TENM2/BGLAP/CCL11/PARVG/NOD2/TINAGL1/PCDH20/BMP4/ZEB1/TGM2/CCR2/TNFRSF4/ZAP70/CALR/ANTXR1/ACTN1/ESAM/RSAD2/CD8A/ADIPOQ                                                                                                                                                                                                                                                                                                                                                                                                                                                                                                                                                                                                                                                                                                                                                                                                                                                                                                                     | 74  |

|            |                                           |         |            |          |         |         |                                                                                                                                                                                                                                                                                                                                                                                                                                                                                                                                                                                                                                                                                                                                                                                                                                                                                                                                                                                                                                                                                                                                                                                                                                                                                                                                                                                                                                                                                                                                                                                                                                                                                     |     |
|------------|-------------------------------------------|---------|------------|----------|---------|---------|-------------------------------------------------------------------------------------------------------------------------------------------------------------------------------------------------------------------------------------------------------------------------------------------------------------------------------------------------------------------------------------------------------------------------------------------------------------------------------------------------------------------------------------------------------------------------------------------------------------------------------------------------------------------------------------------------------------------------------------------------------------------------------------------------------------------------------------------------------------------------------------------------------------------------------------------------------------------------------------------------------------------------------------------------------------------------------------------------------------------------------------------------------------------------------------------------------------------------------------------------------------------------------------------------------------------------------------------------------------------------------------------------------------------------------------------------------------------------------------------------------------------------------------------------------------------------------------------------------------------------------------------------------------------------------------|-----|
| GO:0019932 | second-messenger-mediated signaling       | 20/590  | 210/17046  | 4.33E-05 | 0.00728 | 0.00632 | RCAN2/MRV1/ADM/BHLHA15/GUCY1A3/HRH1/IGF1/KDR/LHCGR/ATP1A2/NFATC3/MCTP2/PTGFR/TENM2/SLC8A1/ZAP70/CASQ1/SPHK1/CD8A/RAPGEF2                                                                                                                                                                                                                                                                                                                                                                                                                                                                                                                                                                                                                                                                                                                                                                                                                                                                                                                                                                                                                                                                                                                                                                                                                                                                                                                                                                                                                                                                                                                                                            | 20  |
| GO:0044707 | single-multicellular organism process     | 261/590 | 6214/17046 | 4.62E-05 | 0.00754 | 0.00654 | ABI1/FARP1/RCAN2/CDKN1C/SPEG/MRV1/TRDN/SPON2/TACC2/PDPN/CELF1/GJB6/TMED10/LECT1/ESM1/CHGA/CHI3L1/CHRNA1/CHRNA2/GPRIN1/FAT3/CLN5/CCR1/SEZ6/CNP/COL9A3/COMP/ADM/IL31RA/OR2A14/CPS1/CRABP1/ZNF358/CRYBB3/FAM101A/CSTA/SMYD1/CYLD/ESCO2/CYP11A1/DIO3/DLG2/DMBT1/ABAT/DTNA/EEF2/EFNA2/EIF4G1/A2M/EPHA1/ESR1/F11/FAT2/FGA/FGF10/BTBD3/SBNO2/FOXL1/FOXC2/EXPH5/AKR1B1/NFASC/EPB41L3/DIP2A/NEDD4L/PSD3/RYPB/MORC3/MAPK8IP2/TSSK2/VGLL2/DFNB31/PNKD/LCE2B/GATM/FGF22/NPTN/AMPD3/BMP10/FFAR2/SCG3/TMOD4/GUCY1A3/SOX8/HLA-DOA/HLA-DPA1/NR4A1/ACACB/HOXC4/HRH1/HSD11B1/HSP90AB1/HTR3A/ID3/RSPO2/IGF1/IGF2/LCE1C/LCE1D/LCE2D/IL1RN/AQP2/IL12RB2/AQP5/INHBA/IRF1/AQP9/ITGA7/ITGB2/IVL/JUP/KCNH2/KCNJ8/KCNMB1/KDR/AMIGO3/HES5/AFF3/LAMA3/STMN1/OR2A5/LDLR/ARHGDI1/LGALS9/LHCGR/LMNA/LMO2/MC2R/MCC/MFNG/MGAT1/MITF/LHX8/MYH4/MYL2/DRG1/NEU1/ATP1A2/NFATC3/NHLH2/NPPC/NRAS/OPRL1/OR2C1/OR3A2/SLC22A18/ATP5B/PARK2/UTP11L/C11orf73/SIRT6/PDE6B/ATP8A2/PITX2/PKHD1/PKM/PLA2G2A/PLAGL1/PML/RIPPLY3/PNLIP/TLR9/TREM1/SSH1/APBB1P/MXRA8/BANP/PPP1CB/HERC6/ELP3/CHRNA9/PARVA/PRKAR1B/IFT122/ERMARD/MCTP2/CSGALNACT1/MAPK3/MAP2K2/PRO C/HTRA1/RGMA/PSMD7/SLURP1/PLEKHG5/TENM2/ERMN/RDH14/MARK4/ACTA2/TRIM27/RGR/BGLAP/SCT/CCL11/NPAS3/NOD2/STRA6/GZF1/DNAI2/VPS33A/BMP4/SLC8A1/BM PR1B/SLIT1/BOK/BPI/STK3/SUPT6H/BST2/ZEB1/TEAD3/TGM2/TCHH/TNFAIP3/TNFRSF1A/TRPC6/CCR2/TNFRSF4/WNT10B/ZAP70/ZNF7/CACNA1E/RAB7A/LST1/CALD1/ZC3H12A/C 6orf25/CALR/CAST/CAP2B/SPATA16/BFSP2/NROB2/CASQ1/HOPX/TTBK1/TRIM63/IFITM1/SCIN/RUNX1/TP63/RUNX3/IRS2/ACTN1/TNFRSF11A/ALDH1A2/SPHK1/STBD1/PIAS2/ESA M/SLC16A3/CBFA2T2/RSAD2/AURKB/CD8A/ADIPOQ/MICAL2/RAPGEF2/CD79A/FGF19                                                 | 261 |
| GO:0048583 | regulation of response to stimulus        | 152/590 | 3283/17046 | 4.99E-05 | 0.00789 | 0.00685 | ABI1/TANK/FARP1/KLRG1/RCAN2/CDKN1C/SPON2/LECT1/ESM1/CHI3L1/CCR1/SEZ6/TNFAIP8L1/MAP3K8/ADM/IL31RA/MIB2/MPP7/CYLD/ZNF366/DMBT1/A2M/ESR1/F11/SPATA 13/FCGR2A/FGA/FGF10/SBNO2/FOXL1/FOXC2/AKR1B1/MCL1/RHOB2/NUP210/NEDD4L/PSD3/PUM2/ARHGEF18/MAPK8IP2/SLC37A4/ALS2CL/DNAJ2/FGF22/NPTN/CYTH4/B MP10/FFAR2/GRB10/HK1/HLA-DPA1/NR4A1/HSPA1L/HSP90AB1/RSPO2/IGF1/IGF2/IL1R1/IL1RN/IL16/INHBA/IRF1/ITGB2/ITGB7/JUP/KDR/HES5/ARHGDI1/LGALS9/LHCGR/LMNA/MCC/MFNG/MOV10/PLEKHG7/ NFATC3/NRAS/PARK2/C11orf73/SIRT6/PDE6B/PKHD1/PLA2G2A/PML/TLR9/TREM1/PPP1CB/IFT122/LMBRD1/PAG1/MAPK3/MAP2K2/PROC/HTRA1/PAK6/PSMD7/PLEKHG5/PTPRE /TRIM27/RGS12/RPA3/CCL11/NOD2/STRA6/ARHGAP9/TMEM237/BMP4/BMPR1B/STAT2/STK3/SUPT6H/BST2/ZEB1/TNFAIP3/TNFRSF1A/TRAF5/CCR2/WNT10B/ZAP70/CA7/CACN A1E/RAB7A/CARD14/BCL2L14/CALR/CMAP/CASQ1/HOPX/TRIM63/RAE1/IFITM1/CDK10/RUNX1/TP63/RUNX3/IRS2/CRADD/TNFRSF11A/SPHK1/SKAP2/STARD13/PIAS2/MAP3K6/ RSAD2/CD8A/TRIP10/ADIPOQ/NUP93/RAPGEF2/CD79A/IQSEC1/FGF19                                                                                                                                                                                                                                                                                                                                                                                                                                                                                                                                                                                                                                                                                                          | 152 |
| GO:0008360 | regulation of cell shape                  | 15/590  | 132/17046  | 5.26E-05 | 0.00808 | 0.00701 | PDPN/EPB41L3/ARHGEF18/GAS2/ITGA7/ITGB2/KDR/FBLIM1/PALMD/PARVA/CDC42SE1/ERMN/CCL11/LST1/TTBK1                                                                                                                                                                                                                                                                                                                                                                                                                                                                                                                                                                                                                                                                                                                                                                                                                                                                                                                                                                                                                                                                                                                                                                                                                                                                                                                                                                                                                                                                                                                                                                                        | 15  |
| GO:0018149 | peptide cross-linking                     | 9/590   | 51/17046   | 5.56E-05 | 0.00814 | 0.00706 | EGFLAM/CSTA/LCE2B/LCE1C/LCE1D/LCE2D/IVL/SPOCK3/TGM2                                                                                                                                                                                                                                                                                                                                                                                                                                                                                                                                                                                                                                                                                                                                                                                                                                                                                                                                                                                                                                                                                                                                                                                                                                                                                                                                                                                                                                                                                                                                                                                                                                 | 9   |
| GO:0032501 | multicellular organismal process          | 268/590 | 6425/17046 | 5.62E-05 | 0.00814 | 0.00706 | ABI1/FARP1/RCAN2/CDKN1C/SPEG/MRV1/TRDN/SPON2/TACC2/PDPN/CELF1/GJB6/TMED10/LECT1/ESM1/ADAM29/CHGA/CHI3L1/CHRNA1/CHRNA2/GPRIN1/FAT3/CLN5/CCR1/ SEZ6/CNP/COL9A3/COMP/ADM/IL31RA/OR2A14/CPS1/CRABP1/ZNF358/CRYBB3/FAM101A/CSTA/SMYD1/CYLD/ESCO2/CYP11A1/DIO3/DLG2/DMBT1/ABAT/DTNA/EEF2/EFNA2/EI F4G1/A2M/EPHA1/ESR1/F11/FAT2/FGA/FGF10/BTBD3/SBNO2/FOXL1/FOXC2/EXPH5/AKR1B1/NFASC/EPB41L3/DIP2A/NEDD4L/PSD3/RYPB/MORC3/MAPK8IP2/TSSK2/VGLL2/DFN B31/PNKD/LCE2B/GATM/FGF22/NPTN/AMPD3/BMP10/FFAR2/SCG3/TMOD4/GUCY1A3/HAS1/SOX8/HLA-DOA/HLA-DPA1/NR4A1/ACACB/HOXC4/HRH1/HSD11B1/HSP90AB1/HTR3A/ID3/RSPO2/IGF1/IGF2/LCE1C/LCE1D/LCE2D/IL1R1/IL1RN/AQP2/IL12RB2/AQP5/INHBA/IRF1/AQP9/ITGA7/ITGB2/ IVL/JUP/KCNH2/KCNJ8/KCNMB1/KDR/AMIGO3/HES5/AFF3/LAMA3/STMN1/OR2A5/LDLR/ARHGDI1/LGALS9/LHCGR/LMNA/LMO2/MC2R/MCC/MFNG/MGAT1/MITF/LHX8/MYH4/ MYL2/DRG1/NEU1/ATP1A2/NFATC3/NHLH2/NPPC/NRAS/OPRL1/OR2C1/OR3A2/SLC22A18/ATP5B/PARK2/UTP11L/C11orf73/SIRT6/PDE6B/ATP8A2/PITX2/PKHD1/PKM/PLA2G2A/ PLAGL1/PML/RIPPLY3/PNLIP/TLR9/TREM1/SSH1/APBB1P/MXRA8/BANP/PPP1CB/HERC6/ELP3/CHRNA9/PARVA/PRKAR1B/IFT122/ERMARD/MCTP2/CSGALNACT1/MAPK3/MAP2K 2/PROC/HTRA1/RGMA/PSMD7/SLURP1/PTGFR/PLEKHG5/TENM2/ERMN/RDH14/MARK4/ACTA2/TRIM27/RGR/BGLAP/SCT/CCL11/NPAS3/NOD2/STRA6/GZF1/DNAI2/VPS33A/BMP 4/SLC8A1/BMPR1B/SLIT1/BOK/BPI/STK3/SUPT6H/BST2/ZEB1/TEAD3/TGM2/TCHH/TNFAIP3/TNFRSF1A/TRPC6/CCR2/TNFRSF4/WNT10B/ZAP70/ZNF7/CACNA1E/RAB7A/LST1/CAL D1/ZC3H12A/C6orf25/CALR/SLIRP/CAST/CAP2B/SPATA16/BFSP2/NROB2/CASQ1/HOPX/TTBK1/TRIM63/IFITM1/SCIN/RUNX1/TP63/RUNX3/IRS2/ACTN1/TNFRSF11A/ALDH1A2/SPH K1/CCNA1/ENDOU/STBD1/PIAS2/ESAM/SLC16A3/CBFA2T2/RSAD2/AURKB/CD8A/ADIPOQ/MICAL2/RAPGEF2/CD79A/FGF19 | 268 |
| GO:0006928 | movement of cell or subcellular component | 92/590  | 1789/17046 | 6.39E-05 | 0.00901 | 0.00782 | ABI1/SPON2/PDPN/CHGA/KIF12/AP3S1/CCR1/COL9A3/KLC3/DNAH6/EFNA2/EPHA1/FAT2/SPATA13/PHACTR1/FGF10/FOXC2/NFASC/FGF22/BMP10/FFAR2/HAS1/SOX8/NR4A1/HR H1/HSP90AB1/IGF1/IL1RN/IL16/ITGA7/ITGB2/ITGB7/JUP/KDR/KIF25/LAMA3/STMN1/LCP1/ARHGDI1/LGALS9/LMNA/MCC/MYH4/MYL2/ATP1A2/NRAS/P2RY6/ATP5B/PITX2/PKHD 1/PML/TREM1/ELP3/PARVA/IFT122/MAPK3/MAP2K2/PROC/PAK6/RGMA/PSMD7/PLEKHG5/TENM2/FAM60A/CCL11/NOD2/DNAI2/BMP4/SLC8A1/BMPR1B/SLIT1/BST2/TRPC6/CC R2/ZAP70/CACNA1E/CALD1/CALR/SLIRP/CAP2B/DYNLRB2/IFITM1/RUNX3/IRS2/ACTN1/TNFRSF11A/SPHK1/ESAM/SLC16A3/ADIPOQ/RAPGEF2/FGF19                                                                                                                                                                                                                                                                                                                                                                                                                                                                                                                                                                                                                                                                                                                                                                                                                                                                                                                                                                                                                                                                                                            | 92  |
| GO:0042127 | regulation of cell proliferation          | 75/590  | 1385/17046 | 6.62E-05 | 0.00909 | 0.00789 | ABI1/CDKN1C/SPEG/GJB6/LECT1/ESM1/ADM/IL31RA/EPHA1/ESR1/FGF10/AKR1B1/MORC3/BMP10/SOX8/HLA-DPA1/NR4A1/TFAP2E/ZC3H12D/IGF1/IGF2/IL12RB2/INHBA/IRF1/JUP/KDR/HES5/LGALS9/MCC/MITF/NEU1/NPPC/NRAS/SIRT6/ATP8A2/PITX2/PKHD1/PLA2G2A/PML/RIPPLY3/IFT1 22/PRKRIR/HTRA1/SLURP1/PTGFR/RPA3/CCL11/NOD2/BMP4/BMPR1B/STK3/ZEB1/TNFAIP3/TRAF5/CCR2/TNFRSF4/WNT10B/ZAP70/LST1/CALR/IFITM1/SCIN/CDK10/RUNX1/TP63 /RUNX3/IRS2/TNFRSF11A/ALDH1A2/SPHK1/SKAP2/PRC1/ADIPOQ/RAPGEF2/FGF19                                                                                                                                                                                                                                                                                                                                                                                                                                                                                                                                                                                                                                                                                                                                                                                                                                                                                                                                                                                                                                                                                                                                                                                                                 | 75  |

|            |                                      |         |            |          |         |         |                                                                                                                                                                                                                                                                                                                                                                                                                                                                                                                                                                                                                                                                                                                                                                                                                                                                                                                                                                                                                                                                                                                                                                                                                                                                                                                                                                                                                                    |     |
|------------|--------------------------------------|---------|------------|----------|---------|---------|------------------------------------------------------------------------------------------------------------------------------------------------------------------------------------------------------------------------------------------------------------------------------------------------------------------------------------------------------------------------------------------------------------------------------------------------------------------------------------------------------------------------------------------------------------------------------------------------------------------------------------------------------------------------------------------------------------------------------------------------------------------------------------------------------------------------------------------------------------------------------------------------------------------------------------------------------------------------------------------------------------------------------------------------------------------------------------------------------------------------------------------------------------------------------------------------------------------------------------------------------------------------------------------------------------------------------------------------------------------------------------------------------------------------------------|-----|
| GO:0009719 | response to endogenous stimulus      | 83/590  | 1578/17046 | 7.17E-05 | 0.00959 | 0.00832 | CDKN1C/TMED10/CHRNA1/CHRNA2/AP3S1/ADM/CPS1/CYP11A1/ZNF366/ABAT/AGXT/EIF4G1/ESR1/FGA/FGF10/FOXC2/AKR1B1/NEDD4L/ARHGEF18/STEAP2/GATM/FGF22/NPTN/BMP10/GRB10/HAS1/NR4A1/HRH1/HTR3A/IGF2/IL1R1/IL1RN/INHBA/AQP9/JUP/IPO5/HES5/LHCGR/LMO2/MOV10/ATP1A2/NRAS/OPRL1/P2RY6/PARK2/PITX2/PKM/PRKAG3/PML/TLR9/SSH1/PPP1CB/CHRNA9/PRKAR1B/LMBRD1/MAPK3/MAP2K2/HTRA1/RGMA/PSMD7/PTGFR/PTPRE/BGLAP/NOD2/BMP4/SLC8A1/SLC9A3/BMPR1B/ZEB1/TNFAIP3/WNT10B/CPEB4/CALR/NROB2/TRIM63/RUNX1/RUNX3/IRS2/ALDH1A2/ADIPQ/RAPGEF2/FGF19/NR1H4                                                                                                                                                                                                                                                                                                                                                                                                                                                                                                                                                                                                                                                                                                                                                                                                                                                                                                                 | 83  |
| GO:0035556 | intracellular signal transduction    | 119/590 | 2478/17046 | 9.45E-05 | 0.01233 | 0.0107  | ABI1/TANK/FARP1/RCAN2/MRVI1/CHI3L1/CCR1/SEZ6/TNFAIP8L1/MAP3K8/ADM/IL131RA/MIB2/SGOL1/PPM1L/CYLD/BHLHA15/A2M/ESR1/SPATA13/FGA/FGF10/FHIT/AKR1B1/RHOBTB2/PSD3/PPP1R13B/PUM2/ARHGEF18/MAPK8IP2/TSSK2/RASGEF1C/ALS2CL/ACOT11/PLEK2/FGF22/CYTH4/BMP10/GUCY1A3/NR4A1/HRH1/IGF1/IGF2/IL1RN/INHBA/KCNH2/KDR/HES5/STMN1/LCP1/ARHGDI1/LGALS9/LHCGR/RAB19/MOV10/PLEKHG7/ATP1A2/NFATC3/NRAS/PARK2/PKHD1/PLA2G2A/PRKAG3/PML/TLR9/TREM1/RIN2/PPP1CB/MOB1A/IFT122/MCTP2/LMBRD1/PAG1/WSB2/MAPK3/MAP2K2/PAK6/PSMD7/PTGFR/PLEKHG5/TENM2/RGS12/RIT2/CCL11/NOD2/ARHGAP9/BMP4/SLC8A1/BOK/STAT2/STK3/BST2/TEAD3/TNFAIP3/TNFRSF1A/TRAFF5/CCR2/ZAP70/RAB7A/CARD14/CASQ1/IFITM1/CDK10/TP63/IRS2/CRADD/TNFRSF11A/SPHK1/PRC1/STARD13/MAP3K6/AURKB/CD8A/TRIP10/ADIPQ/RAB36/RAPGEF2/IQSEC1/FGF19                                                                                                                                                                                                                                                                                                                                                                                                                                                                                                                                                                                                                                                                | 119 |
| GO:0051179 | localization                         | 221/590 | 5173/17046 | 0.0001   | 0.013   | 0.01128 | ABI1/TRDN/SPON2/COG5/TACC2/PDPN/TMED10/RER1/CHGA/CHI3L1/PKP3/EXOC3/CHRNA1/CHRNA2/PANX3/RBP7/AP3S1/CCR1/SLC51B/CNP/ADM/CRABP1/PARP4/MPP7/LDLR/AD3/KLC3/ABCC13/SH3D19/CYLD/ESCO2/DDOST/BHLHA15/DLG2/DMBT1/DNAH6/ABAT/AGXT/A2M/SLC10A4/EPHA1/FAT2/SPATA13/FCGR2A/PHACTR1/FGA/FGF10/TRAK1/FOX C2/EXPH5/NFASC/EPB41L3/GGA3/FLOT2/MLC1/TBC1D1/NUP210/NEDD4L/SYNE1/MORC3/MAPK8IP2/SLC37A4/SAMM50/SEC31B/STEAP2/SLC17A5/BMP10/GPR26/FFAR2/GRB10/GRIK4/DNAJC15/SCG3/HAS1/SOX8/HK1/ANXA13/NR4A1/ACACB/HRH1/HSPA11/HSP90AB1/HTR3A/IGF1/IGF2/IL1RN/AQP2/IL16/AQP5/INHBA/AQP9/ITGA7/ITGB2/ITGB7/JUP/KC NH2/KCNJ8/KCNJ9/KCNMB1/KDR/IPO5/LAMA3/STMN1/LCP1/LDLR/LGALS9/LMNA/RAB19/MCC/ASGR1/NUBP1/ATP1A2/NFATC3/NRAS/OPRL1/SLC22A18/P2RY6/ATP5B/ANO7/P ARK2/PCYOX1/C11orf73/SIRT6/ATP8A2/PITX2/PKHD1/LRP1B/PRKAG3/PML/FXYD6/SLCO1C1/PNLI/TLR9/TREM1/RIN2/BANP/ELP3/DNAJC17/GOLPH3/SLC47A1/SLC29A3/TRPV6/SLC30A10/CHRNA9/PEX26/PARVA/PRKAR1B/IFT122/LMBRD1/APOBR/MAPK3/MAP2K2/PROC/MRAP/TRPV5/CDC42SE1/PAK6/PLEKHG5/FAM60A/TRIM27/SCT/CCL11/ABHD4/NO D2/TINAGL1/STRA6/VPS33A/BMP4/SLC4A1/ZG16/SLC6A12/SLC8A1/SLC9A3/SLC20A2/SLIT1/SRP68/SUPT6H/BST2/TGM2/TNFAIP3/TNFRSF1A/TRPC6/TRPM2/CCR2/TNFRSF4/UCP1 /ZAP70/CA7/CACNA1E/RAB7A/ZC3H12A/CALR/SLIRP/DYNLRB2/SLC25A18/MFSD7/ATP13A4/NROB2/MON1A/CASQ1/RAE1/SLC43A1/IFITM1/SCIN/SERPINA6/IRS2/ACTN1/TNFRSF1 1A/SPHK1/ENDOU/SYT7/ESAM/SLC16A3/RSAD2/AURKB/TRIP10/ADIPQ/RAB36/NUP93/RAPGEF2/FGF19/NR1H4 | 221 |
| GO:0019722 | calcium-mediated signaling           | 14/590  | 125/17046  | 0.00011  | 0.01323 | 0.01148 | RCAN2/BHLHA15/IGF1/KDR/ATP1A2/NFATC3/MCTP2/PTGFR/TENM2/SLC8A1/ZAP70/CASQ1/SPHK1/CD8A                                                                                                                                                                                                                                                                                                                                                                                                                                                                                                                                                                                                                                                                                                                                                                                                                                                                                                                                                                                                                                                                                                                                                                                                                                                                                                                                               | 14  |
| GO:0007275 | multicellular organismal development | 197/590 | 4527/17046 | 0.00011  | 0.01323 | 0.01148 | ABI1/FARP1/CDKN1C/SPEG/SPON2/TACC2/PDPN/CELF1/GJB6/TMED10/LECT1/ESM1/CHI3L1/CHRNA1/GPRIN1/FAT3/CLN5/CCR1/SEZ6/CNP/COL9A3/COMP/ADM/IL131RA/CPS1/C RABP1/ZNF358/FAM101A/CSTA/SMYD1/CYLD/ESCO2/CYP11A1/DLG2/DMBT1/EEF2/EFNA2/EIF4G1/EPHA1/ESR1/FGA/FGF10/BTBD3/SBNO2/FOX11/FOXC2/EXPH5/AKR1B1/NFAS C/EPB41L3/DIP2A/NEDD4L/PSD3/RYPB/MORC3/MAPK8IP2/TSSK2/VGLL2/DFNB31/LCE2B/GATM/FGF22/NPTN/BMP10/SOX8/HLA-DOA/NR4A1/ACACB/HOXC4/HSD11B1/HSP90AB1/ID3/RSPO2/IGF1/IGF2/LCE1C/LCE1D/LCE2D/IL1RN/AQP2/AQP5/INHBA/IRF1/ITGA7/ITGB2/IVL/JUP/KCNJ8/KDR/AMIGO3/HES5/ AFF3/LAMA3/STMN1/ARHGDI1/LGALS9/LHCGR/LMNA/LMO2/MC2R/MFNG/MGAT1/MITF/LHX8/MYL2/DRG1/NEU1/NFATC3/NHLH2/NPPC/NRAS/ATP5B/PARK2/UTP11L/C11orf7 3/SIRT6/PDE6B/ATP8A2/PITX2/PKHD1/PKM/PLAGL1/PML/RIPPLY3/SSH1/MXRA8/BANP/HERC6/ELP3/CHRNA9/PARVA/IFT122/ERMARD/MCTP2/CSGALNACT1/MAPK3/MAP2K2/H TRA1/RGMA/PSMD7/TENM2/MARK4/ACTA2/BGLAP/SCT/CCL11/STRA6/GZF1/DNAI2/VPS33A/BMP4/SLC8A1/BMPR1B/SLIT1/BOK/STK3/SUPT6H/BST2/ZEB1/TGM2/TCHH/TNFAIP 3/TNFRSF1A/TRPC6/CCR2/WNT10B/ZAP70/ZNF7/LST1/ZC3H12A/C6orf25/CALR/CAST/SPATA16/BFSP2/NROB2/CASQ1/HOPX/IFITM1/SCIN/RUNX1/TP63/RUNX3/IRS2/ACTN1/TNFR SF11A/ALDH1A2/SPHK1/CBFA2T2/RSAD2/AURKB/CD8A/ADIPQ/MICAL2/RAPGEF2/CD79A/FGF19                                                                                                                                                                                                 | 197 |
| GO:0030154 | cell differentiation                 | 157/590 | 3469/17046 | 0.00012  | 0.01383 | 0.012   | ABI1/FARP1/CDKN1C/SPEG/SPON2/TACC2/CELF1/LECT1/GPRIN1/CLN5/CCR1/SEZ6/CNP/COL9A3/ADM/IL131RA/CPS1/FAM101A/CSTA/SMYD1/CYLD/ESCO2/CYP11A1/BHLHA15/D MBT1/EEF2/EFNA2/EIF4G1/A2M/ELK4/EPHA1/ESR1/FGA/FGF10/BTBD3/SBNO2/FOX11/FOXC2/EXPH5/NFASC/EPB41L3/FLOT2/NEDD4L/SYNE1/PSD3/MAPK8IP2/TSSK2/DFNB31/L CE2B/FGF22/NPTN/BMP10/FFAR2/TMOD4/SOX8/HLA-DOA/ANXA13/NR4A1/HSP90AB1/ID3/RSPO2/IGF1/IGF2/LCE1C/LCE1D/LCE2D/FOXK2/INHBA/IRF1/ITGA7/ITGB2/ITGB7/IVL/JUP/KDR/HES5/LAMA3/STMN1/ARHGDI1/LGALS9/LMN A/MITF/LHX8/MYL2/NEU1/NFATC3/NHLH2/NPPC/NRAS/ATP5B/PARK2/SIRT6/ATP8A2/PITX2/PLA2G2A/PLAGL1/PML/SSH1/MXRA8/HERC6/ELP3/PARVA/MAPK3/MAP2K2/MRAP/ HTRA1/RGMA/PSMD7/TENM2/RDH14/ACTA2/BGLAP/VPS33A/BMP4/SLC8A1/BMPR1B/SLIT1/BOK/STK3/SUPT6H/ZEB1/TEAD3/TCHH/TNFRSF1A/TRPC6/UCP1/WNT10B/ZAP70/LS T1/ZC3H12A/C6orf25/CALR/SLIRP/CAST/SPATA16/ANTXR1/BFSP2/CASQ1/HOPX/IFITM1/SCIN/RUNX1/TP63/RUNX3/IRS2/ACTN1/TNFRSF11A/ALDH1A2/PIAS2/CBFA2T2/RSAD2/D APL1/CD8A/ADIPQ/RAPGEF2/CD79A/FGF19                                                                                                                                                                                                                                                                                                                                                                                                                                                  | 157 |
| GO:0002376 | immune system process                | 115/590 | 2392/17046 | 0.00012  | 0.01414 | 0.01226 | ABI1/TANK/CD300LD/KLRG1/CDKN1C/SPON2/CHGA/CCR1/MAP3K8/ADM/IL131RA/CYLD/ESCO2/DDOST/DMBT1/EEF2/EFNA2/A2M/FCGR2A/FGA/FGF10/SBNO2/FOX11/FLOT2/PU M2/SLC37A4/FGF22/AMPD3/FFAR2/HLA-DOA/HLA-DPA1/NR4A1/HRH1/HSP90AB1/ZC3H12D/CD300E/IGF1/IGF2/IL1R1/IL1RN/IL16/INHBA/IRF1/AQP9/ITGB2/ITGB7/KCNJ8/KDR/HES5/LCP1/LGALS9/LMO2/MITF/MOV10/NFATC3/N RAS/OAS2/IL21R/PITX2/PML/TLR9/TREM1/POU2AF1/APBB1P/HERC6/PRKAR1B/PAG1/MAPK3/MAP2K2/PROC/HTRA1/PSMD7/PTPRE/TRIM27/BGLAP/CCL11/NOD2/TINAGL1/VPS 33A/BMP4/BPI/STAT2/STK3/SUPT6H/BST2/ZEB1/TNFAIP3/CCR2/TNFRSF4/WNT10B/ZAP70/CA7/RAB7A/LST1/ZC3H12A/C6orf25/CALR/IFITM1/SCIN/RUNX1/RUNX3/IRS2/ACTN1/T NFRSF11A/ENDOU/SKAP2/ESAM/SLC16A3/RSAD2/CD8A/ADIPQ/NUP93/RAPGEF2/CD79A/FGF19                                                                                                                                                                                                                                                                                                                                                                                                                                                                                                                                                                                                                                                                                                           | 115 |
| GO:0008283 | cell proliferation                   | 90/590  | 1775/17046 | 0.00013  | 0.01455 | 0.01262 | ABI1/CDKN1C/SPEG/TACC2/PDPN/GJB6/LECT1/ESM1/PDAP1/ADM/IL131RA/DMBT1/DPH1/EPHA1/ESR1/FGF10/FOXC2/AKR1B1/MORC3/BMP10/SOX8/HLA- DPA1/NR4A1/TFAP2E/ZC3H12D/IGF1/IGF2/IL1R2/IL15RA/INHBA/IRF1/ITGB2/JUP/KDR/HES5/LGALS9/MCC/MITF/NEU1/NPPC/NRAS/SIRT6/ATP8A2/PITX2/PKHD1/PLA2G2A/P M L/RIPPLY3/IFT122/CSGALNACT1/MAP2K2/PRKRIR/HTRA1/SLURP1/PTGFR/TRIM27/RPA3/CCL11/NOD2/BMP4/BMPR1B/BOK/STK3/BST2/ZEB1/TNFAIP3/TRAFF5/CCR2/TNFRSF4/WN T10B/ZAP70/LST1/CALR/RETNLB/IFITM1/SCIN/CDK10/RUNX1/TP63/RUNX3/IRS2/TNFRSF11A/ALDH1A2/SPHK1/SKAP2/PRC1/ADIPQ/RAPGEF2/CD79A/FGF19                                                                                                                                                                                                                                                                                                                                                                                                                                                                                                                                                                                                                                                                                                                                                                                                                                                                 | 90  |

|            |                                                |         |            |         |         |         |                                                                                                                                                                                                                                                                                                                                                                                                                                                                                                                                                                                                                                                                                                                                                                                                                                                                                                                                                                                                                                                                                                                                                                                                                                                                                    |     |
|------------|------------------------------------------------|---------|------------|---------|---------|---------|------------------------------------------------------------------------------------------------------------------------------------------------------------------------------------------------------------------------------------------------------------------------------------------------------------------------------------------------------------------------------------------------------------------------------------------------------------------------------------------------------------------------------------------------------------------------------------------------------------------------------------------------------------------------------------------------------------------------------------------------------------------------------------------------------------------------------------------------------------------------------------------------------------------------------------------------------------------------------------------------------------------------------------------------------------------------------------------------------------------------------------------------------------------------------------------------------------------------------------------------------------------------------------|-----|
| GO:0009888 | tissue development                             | 86/590  | 1684/17046 | 0.00015 | 0.01612 | 0.01399 | ABI1/SPEG/LECT1/CHI3L1/CHRNA1/CCR1/COMP/ADM/CP51/ZNF358/FAM101A/CSTA/SMYD1/CYP11A1/DMBT1/ESR1/FGF10/SBNO2/FOXL1/FOXC2/EXPH5/FLOT2/VGLL2/LCE2B/GATM/BMP10/SOX8/HOXC4/ID3/RSPO2/IGF1/LCE1C/LCE1D/LCE2D/INHBA/ITGA7/ITGB2/IVL/KDR/HES5/LAMA3/LMNA/MITF/MYL2/NFATC3/NPPC/NRAS/SIRT6/PDE6B/ATP8A2/PITX2/PKM/PLAGL1/PML/IFT122/CSGALNACT1/MAPK3/MAP2K2/ACTA2/BGLAP/CCL11/STRA6/GZF1/BMP4/SLC8A1/BMPR1B/STK3/ZEB1/TGM2/TCHH/TNFRSF1A/WNT10B/CALR/BFSP2/CASQ1/HOPX/SCIN/RUNX1/TP63/RUNX3/ALDH1A2/CBFA2T2/ADIPOQ/MICAL2/RAPGEF2/FGF19                                                                                                                                                                                                                                                                                                                                                                                                                                                                                                                                                                                                                                                                                                                                                       | 86  |
| GO:0044723 | single-organism carbohydrate metabolic process | 42/590  | 669/17046  | 0.00015 | 0.0162  | 0.01406 | GNE/GALNT15/CLN5/SLC51B/NEU4/CP51/PARP4/B3GLCT/MGAT5B/DDOST/ENO2/TRAK1/AKR1B1/SLC37A4/ST6GALNAC3/GBGT1/SLC17A5/DHHD/EOGT/GRB10/HAS1/HK1/HRH1/IGF1/IGF2/MUC21/LHCGR/MGAT1/NEU1/OAS2/PARK2/CHST15/SIRT6/PKM/PRKAG3/PPP1C8/CSGALNACT1/MOGS/CALR/IRS2/STBD1/ADIPOQ                                                                                                                                                                                                                                                                                                                                                                                                                                                                                                                                                                                                                                                                                                                                                                                                                                                                                                                                                                                                                     | 42  |
| GO:0048519 | negative regulation of biological process      | 182/590 | 4153/17046 | 0.00016 | 0.01691 | 0.01467 | ABI1/FARP1/CDKN1C/SPEG/MRV1/TRDN/CEL1F1/GJB6/LECT1/CHGA/ERLIN2/CARD16/CCR1/SEZ6/TNFAIP8L1/COMP/ADM/IL31RA/HUS1B/FAM101A/CSTA/SMYD1/CYLD/DBD1/ZNF366/BHLHA15/DLG2/A2M/ELK4/EPHA1/ESR1/F11/PHACTR1/FGA/FGF10/FHIT/SBNO2/FOXC2/DIP2A/FLOT2/NEDD4L/PPP1R13B/PUM2/RYPB/MORC3/GAS2/SACS/PABPC1/DNAJ2/BMP10/GRB10/DNAJC15/TMOD4/GUCY1A3/GPR132/HAS1/SOX8/HLA-DOA/ANXA13/NR4A1/ACACB/HSP90A1/ID3/ZC3H12D/RSPO2/IGF1/IL1RN/INHBA/IRF1/ITIH4/KCNH2/KDR/KIF25/IPO5/HES5/STMN1/ARHGDI2/LGALS9/LMNA/MCC/MITF/MOV10/MP2/MYL2/NUBP1/ATP1A2/NPPC/NRAS/OPRL1/PAFAH2/ATP5B/PARK2/SPOCK3/SIRT6/ATP8A2/P13/PITX2/PKHD1/PLA2G2A/PLAGL1/PRKAG3/PML/RIPPLY3/TLR9/BANP/PPP1C/B/DNAJC17/FANCI/PRKAR1B/IFT122/LMBRD1/PAG1/MAP2K2/PRKRIR/PROC/HTRA1/CDC42SE1/PSMD7/SLURP1/PTGFR/TENM2/GATAD2B/PTPBE/CREBZF/FAM60A/TRIM27/RGS12/SCT/NOD2/GZF1/BMP4/ZNF649/SLC8A1/BMPR1B/SLIT1/BPI/STK3/SUPT6H/BST2/ZEB1/TERF1/TNFAIP3/TNFRSF1A/CCR2/TNFRSF4/WNT10B/RAB7A/CARD14/LST1/ZC3H12A/CP/EB4/CALR/SLIRP/CAST/CAPZB/NROB2/CASQ1/HOPX/IFITM1/SCIN/CDK10/RUNX1/TP63/RUNX3/SERPINA6/IRS2/ACTN1/CRADD/ALDH1A2/SPHK1/SKAP2/ERI1/PIAS2/CBFA2T2/RSAD2/AURKB/DAPL1/ADIPOQ/N4BP1/RAPGEF2/FGF19/NR1H4                                                                                                                              | 182 |
| GO:0051216 | cartilage development                          | 17/590  | 179/17046  | 0.00016 | 0.01691 | 0.01467 | LECT1/CHI3L1/COMP/FAM101A/BMP10/HOXC4/RSPO2/HES5/NPPC/CSGALNACT1/MAPK3/BMP4/BMPR1B/ZEB1/WNT10B/SCIN/RUNX3                                                                                                                                                                                                                                                                                                                                                                                                                                                                                                                                                                                                                                                                                                                                                                                                                                                                                                                                                                                                                                                                                                                                                                          | 17  |
| GO:0008285 | negative regulation of cell proliferation      | 39/590  | 608/17046  | 0.00017 | 0.01691 | 0.01467 | ABI1/CDKN1C/SPEG/GJB6/LECT1/ADM/FGF10/MORC3/ZC3H12D/IGF1/INHBA/IRF1/LGALS9/MCC/NPPC/SIRT6/ATP8A2/PLA2G2A/PML/RIPPLY3/IFT122/PRKRIR/SLURP1/BMP4/BMPR1B/STK3/ZEB1/TNFAIP3/WNT10B/LST1/IFITM1/SCIN/CDK10/RUNX1/RUNX3/ALDH1A2/SKAP2/ADIPOQ/RAPGEF2                                                                                                                                                                                                                                                                                                                                                                                                                                                                                                                                                                                                                                                                                                                                                                                                                                                                                                                                                                                                                                     | 39  |
| GO:0048856 | anatomical structure development               | 204/590 | 4751/17046 | 0.00017 | 0.01719 | 0.01491 | ABI1/FARP1/CDKN1C/SPEG/SPON2/TACC2/PDPN/CEL1F1/GJB6/TMED10/LECT1/ESM1/CHI3L1/CHRNA1/GPRIN1/CLN5/CCR1/SEZ6/CNP/COL9A3/COMP/ADM/IL31RA/CPM/CP51/ZNF358/FAM101A/CSTA/SMYD1/SH3D19/CYLD/ESCO2/CYP11A1/BHLHA15/DLG2/DMBT1/EEF2/EFNA2/EIF4G1/EPHA1/ESR1/FGA/FGF10/BTBD3/SBNO2/FOXL1/FOXC2/EXPH5/AKR1B1/NFASC/EPB41L3/FLOT2/NEDD4L/SYNE1/PSD3/ARHGFE18/MAPK8IP2/TSSK2/VGLL2/DFNB31/GAS2/LCE2B/GATM/FGF22/NPTN/BMP10/TMOD4/SOX8/HLA-DOA/NR4A1/ACACB/HOXC4/HSD11B1/HSP90A1/TFAP2E/ID3/RSPO2/IGF1/IGF2/LCE1C/LCE1D/LCE2D/IL1RN/AQP2/IL11RA/FOXK2/AQP5/INHBA/IRF1/ITGA7/ITGB2/ITGB7/IVL/JUP/KCNJ8/KDR/AMIGO3/HES5/AFF3/LAMA3/STMN1/ARHGDI2/LGALS9/LHCGR/LMNA/LMO2/MC2R/MGAT1/MITF/LHX8/MYL2/NEU1/NFATC3/NHLH2/NPPC/NRAS/ATP5B/PARK2/UTP11L/C11orf73/SIRT6/PDE6B/ATP8A2/PITX2/PKHD1/PKM/PLAGL1/PML/RIPPLY3/SSH1/MXRA8/FBLIM1/PALMD/HERC6/ELP3/CHRNA9/PARVA/IFT122/CSGALNACT1/MAPK3/MAP2K2/HTRA1/CDC42SE1/RGMA/PSMD7/TENM2/ERMN/MARK4/ACTA2/BGLAP/SCT/CCL11/STRA6/GZF1/DNAI2/TMEM237/VPS33A/BMP4/SLC8A1/BMPR1B/SLIT1/BOK/STK3/SUPT6H/ZEB1/TEAD3/TGM2/TCHH/TNFAIP3/TNFRSF1A/TRPC6/CCR2/WNT10B/ZAP70/LST1/ZC3H12A/C6orf25/CALR/SLIRP/CAST/CAPZB/ANTXR1/BFSP2/NROB2/CASQ1/HOPX/TTBK1/SCIN/RUNX1/TP63/RUNX3/IRS2/ACTN1/TNFRSF11A/ALDH1A2/SPHK1/CBFA2T2/RSAD2/CD8A/ADIPOQ/MICAL2/RAPGEF2/CD79A/FGF19 | 204 |
| GO:0042692 | muscle cell differentiation                    | 26/590  | 346/17046  | 0.00019 | 0.01849 | 0.01604 | SPEG/ADM/SMYD1/BHLHA15/FGF10/FLOT2/SYNE1/BMP10/TMOD4/SOX8/ID3/IGF1/IGF2/LMNA/MYL2/NFATC3/PITX2/BMP4/SLC8A1/SUPT6H/ZEB1/WNT10B/CALR/CAST/CASQ1/HOPX                                                                                                                                                                                                                                                                                                                                                                                                                                                                                                                                                                                                                                                                                                                                                                                                                                                                                                                                                                                                                                                                                                                                 | 26  |
| GO:0002682 | regulation of immune system process            | 73/590  | 1391/17046 | 0.00022 | 0.02049 | 0.01778 | ABI1/TANK/KLRG1/SPON2/CCR1/MAP3K8/IL31RA/CYLD/DMBT1/A2M/FCGR2A/FGF10/FLOT2/PUM2/SLC37A4/FGF22/FFAR2/HLA-DOA/HLA-DPA1/NR4A1/HSP90A1/ZC3H12D/IGF1/IGF2/INHBA/IRF1/ITGB2/ITGB7/KDR/HES5/LGALS9/MITF/MOV10/NFATC3/NRAS/PML/TLR9/TREM1/PAG1/MAPK3/MAP2K2/HTRA1/PSMD7/PTPRE/TRIM27/BGLAP/NOD2/BMP4/BPI/STAT2/SUPT6H/BST2/ZEB1/TNFAIP3/CCR2/TNFRSF4/ZAP70/CA7/LST1/ZC3H12A/CALR/IFITM1/SCIN/RUNX1/IRS2/SKAP2/RSAD2/CD8A/ADIPOQ/NUP93/RAPGEF2/CD79A/FGF19                                                                                                                                                                                                                                                                                                                                                                                                                                                                                                                                                                                                                                                                                                                                                                                                                                  | 73  |
| GO:0019725 | cellular homeostasis                           | 44/590  | 725/17046  | 0.00022 | 0.02049 | 0.01778 | TRDN/GJB6/EGLN2/CHRNA1/CLN5/CCR1/ADM/ESR1/NEDD4L/NPTN/HK1/NME9/IL1R1/AQP2/AQP5/AQP9/NUBP1/ATP1A2/OPRL1/ATP5B/PARK2/PDE6B/PKHD1/PML/SLC30A10/CHRNA9/SLAMF8/RF2/RPA3/CCL11/BMP4/SLC4A1/SLC8A1/TERF1/TGM2/TRPC6/CCR2/CA7/CACNA1E/RAB7A/CALR/ATP13A4/CASQ1/IRS2                                                                                                                                                                                                                                                                                                                                                                                                                                                                                                                                                                                                                                                                                                                                                                                                                                                                                                                                                                                                                        | 44  |
| GO:0048878 | chemical homeostasis                           | 54/590  | 949/17046  | 0.00022 | 0.02049 | 0.01778 | TRDN/GJB6/CLN5/CCR1/ADM/CP51/DBD1/BHLHA15/ESR1/NEDD4L/SLC37A4/STEAP2/NPTN/FFAR2/HK1/IGF1/IL1R1/AQP2/AQP5/AQP9/KCNH2/KDR/LDLR/NUBP1/ATP1A2/OPRL1/ATP5B/PARK2/SIRT6/PDE6B/PKHD1/PML/SLC30A10/CHRNA9/PRKAR1B/SLAMF8/CCL11/ABHD4/BMP4/SLC4A1/SLC8A1/SLC9A3/TGM2/TRPC6/CCR2/CA7/CACNA1E/RAB7A/CALR/ATP13A4/CASQ1/TP63/IRS2/ADIPOQ                                                                                                                                                                                                                                                                                                                                                                                                                                                                                                                                                                                                                                                                                                                                                                                                                                                                                                                                                       | 54  |
| GO:0098602 | single organism cell adhesion                  | 43/590  | 704/17046  | 0.00023 | 0.02049 | 0.01778 | CDH9/PDPN/PKP3/MAP3K8/CSTA/CYLD/DDOST/EPHA1/FGA/NFASC/FLOT2/HLA-DOA/HLA-DPA1/ZC3H12D/IGF1/IGF2/IL1RN/IRF1/ITGA7/ITGB2/ITGB7/JUP/LCP1/LGALS9/NFATC3/PKHD1/APBB1/FBPLIM1/PARVA/PAG1/TENM2/NOD2/BMP4/ZEB1/CCR2/TNFRSF4/ZAP70/CALR/ANTXR1/ESAM/RSAD2/CD8A/ADIPOQ                                                                                                                                                                                                                                                                                                                                                                                                                                                                                                                                                                                                                                                                                                                                                                                                                                                                                                                                                                                                                       | 43  |
| GO:0019221 | cytokine-mediated signaling pathway            | 34/590  | 512/17046  | 0.00023 | 0.02049 | 0.01778 | CCR1/IL31RA/EIF4G1/IL10/HLA-DPA1/HSP90A1/IL1R1/IL1RN/IL10RA/IL11RA/IL12RB2/IL15RA/IRF1/OAS2/IL21R/PARK2/PML/MAPK3/PSMD7/CCL11/STAT2/BST2/TNFRSF1A/CCR2/TNFRSF4/CARD14/RAE1/IFITM1/TNFRSF11A/SPHK1/CCRL2/RSAD2/ADIPOQ/NUP93                                                                                                                                                                                                                                                                                                                                                                                                                                                                                                                                                                                                                                                                                                                                                                                                                                                                                                                                                                                                                                                         | 34  |



|            |                                                                              |         |            |         |         |         |                                                                                                                                                                                                                                                                                                                                                                                                                                                                                                                                                                                                                                                                                                                                                                                                                                                                                                                                                                                                                                                                                           |     |
|------------|------------------------------------------------------------------------------|---------|------------|---------|---------|---------|-------------------------------------------------------------------------------------------------------------------------------------------------------------------------------------------------------------------------------------------------------------------------------------------------------------------------------------------------------------------------------------------------------------------------------------------------------------------------------------------------------------------------------------------------------------------------------------------------------------------------------------------------------------------------------------------------------------------------------------------------------------------------------------------------------------------------------------------------------------------------------------------------------------------------------------------------------------------------------------------------------------------------------------------------------------------------------------------|-----|
| GO:0034097 | response to cytokine                                                         | 44/590  | 732/17046  | 0.00027 | 0.02402 | 0.02084 | CHI3L1/CCR1/IL131RA/CYP11A1/DDOST/EIF4G1/FGA/SBNO2/NUP210/HLA-DPA1/HSP90AB1/IL1R1/IL1RN/IL10RA/IL11RA/IL12RB2/IL15RA/IRF1/ITIH4/AFF3/LGALS9/OAS2/IL21R/PARK2/PML/MAPK3/PSMD7/CCL11/STAT2/BST2/TNFRSF1A/CCR2/TNFRSF4/CARD14/TRIM63/RAE1/IFITM1/TNFRSF11A/ALDH1A2/SPHK1/CCR2/RSAD2/ADIPOQ/NUP93                                                                                                                                                                                                                                                                                                                                                                                                                                                                                                                                                                                                                                                                                                                                                                                             | 44  |
| GO:0032720 | negative regulation of tumor necrosis factor production                      | 7/590   | 38/17046   | 0.00028 | 0.02476 | 0.02148 | LGALS9/TRIM27/NOD2/BPI/TNFAIP3/ZC3H12A/ADIPOQ                                                                                                                                                                                                                                                                                                                                                                                                                                                                                                                                                                                                                                                                                                                                                                                                                                                                                                                                                                                                                                             | 7   |
| GO:0045321 | leukocyte activation                                                         | 40/590  | 647/17046  | 0.00029 | 0.02482 | 0.02153 | CHGA/MAP3K8/IL131RA/CYLD/DDOST/FGF10/SBNO2/FLOT2/HLA-DOA/HLA-DPA1/ZC3H12D/IGF1/IGF2/INHBA/IRF1/ITGB2/LCP1/LGALS9/NFATC3/IL21R/APBB1P/PAG1/PTPRE/NOD2/BMP4/BPI/SUPTG6H/BST2/ZEB1/TNFAIP3/CCR2/TNFRSF4/ZAP70/LST1/ZC3H12A/IRS2/SKAP2/RSAD2/CD8A/CD79A                                                                                                                                                                                                                                                                                                                                                                                                                                                                                                                                                                                                                                                                                                                                                                                                                                       | 40  |
| GO:0043207 | response to external biotic stimulus                                         | 47/590  | 802/17046  | 0.0003  | 0.02482 | 0.02153 | SPON2/GJB6/HNRNPUL1/CHGA/CNP/ADM/CPS1/CYP11A1/DMBT1/FGA/FGF10/SBNO2/PUM2/SLC37A4/GUCY1A3/IL1RN/IL10RA/IL12RB2/IRF1/KCNJ8/STMN1/LGALS9/OAS2/PLA2G2A/PML/TLR9/TREM1/MAPK3/HTRA1/SLAMF8/PTGFR/CREBZF/ACTA2/CCL11/NOD2/BPI/STAT2/BST2/TNFAIP3/TNFRSF1A/CA7/ZC3H12A/IFITM1/TNFRSF11A/RSAD2/CD8A/NU                                                                                                                                                                                                                                                                                                                                                                                                                                                                                                                                                                                                                                                                                                                                                                                             | 47  |
| GO:0051707 | response to other organism                                                   | 47/590  | 802/17046  | 0.0003  | 0.02482 | 0.02153 | SPON2/GJB6/HNRNPUL1/CHGA/CNP/ADM/CPS1/CYP11A1/DMBT1/FGA/FGF10/SBNO2/PUM2/SLC37A4/GUCY1A3/IL1RN/IL10RA/IL12RB2/IRF1/KCNJ8/STMN1/LGALS9/OAS2/PLA2G2A/PML/TLR9/TREM1/MAPK3/HTRA1/SLAMF8/PTGFR/CREBZF/ACTA2/CCL11/NOD2/BPI/STAT2/BST2/TNFAIP3/TNFRSF1A/CA7/ZC3H12A/IFITM1/TNFRSF11A/RSAD2/CD8A/NU                                                                                                                                                                                                                                                                                                                                                                                                                                                                                                                                                                                                                                                                                                                                                                                             | 47  |
| GO:0035295 | tube development                                                             | 37/590  | 585/17046  | 0.00032 | 0.02592 | 0.02248 | PDPN/CHI3L1/ADM/CPS1/ZNF358/ESR1/FGF10/FOXL1/FOXC2/AKR1B1/SOX8/HSD11B1/RSPO2/IGF1/AQP2/KDR/HES5/NFATC3/C11orf73/PITX2/PML/IFT122/MAPK3/MAP2K2/SCT                                                                                                                                                                                                                                                                                                                                                                                                                                                                                                                                                                                                                                                                                                                                                                                                                                                                                                                                         | 37  |
| GO:0071407 | cellular response to organic cyclic compound                                 | 26/590  | 359/17046  | 0.00033 | 0.0268  | 0.02325 | CPS1/CYP11A1/ESR1/FGA/MCL1/NR4A1/HRH1/HSP90AB1/IL1RN/INHBA/AQP9/JUP/ATP1A2/P2RY6/PARK2/SSH1/BGLAP/BMP4/SLC8A1/WNT10B/NR0B2/TRIM63/RAE1/ADIPOQ/RAPGEF2/NR1H4                                                                                                                                                                                                                                                                                                                                                                                                                                                                                                                                                                                                                                                                                                                                                                                                                                                                                                                               | 26  |
| GO:1903556 | negative regulation of tumor necrosis factor superfamily cytokine production | 7/590   | 40/17046   | 0.0004  | 0.03098 | 0.02687 | LGALS9/TRIM27/NOD2/BPI/TNFAIP3/ZC3H12A/ADIPOQ                                                                                                                                                                                                                                                                                                                                                                                                                                                                                                                                                                                                                                                                                                                                                                                                                                                                                                                                                                                                                                             | 7   |
| GO:0016337 | single organismal cell-cell adhesion                                         | 40/590  | 657/17046  | 0.0004  | 0.03098 | 0.02687 | CDH9/PDPN/PKP3/MAP3K8/CSTA/CYLD/DDOST/FGA/NFASC/FLOT2/HLA-DOA/HLA-DPA1/ZC3H12D/IGF1/IGF2/IL1RN/IRF1/ITGA7/ITGB2/ITGB7/JUP/LCP1/LGALS9/NFATC3/PKHD1/APBB1P/FBLIM1/PARVA/PAG1/TENM2/NOD2/BMP4/ZEB1/CCR2/TNFRSF4/ZAP70/ESAM/RSAD2/CD8A/ADIPOQ                                                                                                                                                                                                                                                                                                                                                                                                                                                                                                                                                                                                                                                                                                                                                                                                                                                | 40  |
| GO:1901701 | cellular response to oxygen-containing compound                              | 54/590  | 975/17046  | 0.00043 | 0.03269 | 0.02836 | SPON2/GJB6/AP3S1/CPS1/CYP11A1/EIF4G1/ESR1/FGF10/SBNO2/FOXC2/AKR1B1/MCL1/FGF2/FFAR2/GRB10/NR4A1/IGF2/IL1R1/IL1RN/AQP2/INHBA/AQP9/JUP/IPO5/NRAS/P2RY6/PARK2/PRKAG3/TLR9/SSH1/PRKAR1B/LMBRD1/MAPK3/MAP2K2/PSMD7/PTGFR/PTPRE/BGLAP/NOD2/SLC8A1/ZEB1/TNFAIP3/TRPC6/WNT10B/CACNA1E/ZC3H12A/CPEB4/TRIM63/IRS2/ALDH1A2/ADIPOQ/RAPGEF2/FGF19/NR1H4                                                                                                                                                                                                                                                                                                                                                                                                                                                                                                                                                                                                                                                                                                                                                 | 54  |
| GO:0042221 | response to chemical                                                         | 169/590 | 3882/17046 | 0.00043 | 0.03269 | 0.02836 | CDKN1C/SPON2/GJB6/TMED10/LECT1/CHGA/CHI3L1/ERLIN2/EGLN2/CHRNA1/CHRNA2/AP3S1/CCR1/CNP/COL9A3/ADM/IL131RA/OR2A14/CPS1/PARP4/CYP11A1/DDOST/ZNF366/BHLHA15/ABAT/AGXT/EFNA2/EIF4G1/EPHA1/ESR1/FGA/FGF10/SBNO2/FOXC2/AKR1B1/NFASC/MCL1/NUP210/NEDD4L/ARHGEF18/STEAP2/GATM/FGF22/NPTN/BMP10/FFAR2/GRB10/GUCY1A3/HAS1/HLA-DPA1/NR4A1/HRH1/HSPA1L/HSP90AB1/HTRA3/IGF2/LCE1D/IL1R1/IL1RN/IL10RA/AQP2/IL11RA/IL12RB2/IL15RA/IL16/INHBA/IRF1/AQP9/ITGB2/ITIH4/JUP/KCNH2/KCNJ8/KCNMB1/KDR/IPO5/HES5/AFF3/OR2A5/ARHGDI1/LGALS9/LHCGR/LMNA/LMO2/MOV10/ATP1A2/NFATC3/NPPC/NRAS/OAS2/OPRL1/OR2C1/OR3A2/SLC22A18/P2RY6/IL21R/PARK2/PITX2/PKM/PRKAG3/PML/TLR9/TREM1/SSH1/CYP2W1/PPP1CB/SLC47A1/SLC30A10/CHRNA9/PARVA/PRKAR1B/LMBRD1/MAPK3/MAP2K2/HTRA1/SLAMF8/RGMA/PSMD7/PTGFR/PLEKHG5/TENM2/PTPRE/RIT2/BGLAP/CCL11/NOD2/BMP4/SLC8A1/SLC9A3/BMP1R/SLIT1/SRP68/STAT2/BST2/TCEB2/ZEB1/TERF1/TNFAIP3/TNFRSF1A/TRPC6/TRPM2/CCR2/TNFRSF4/WNT10B/CACNA1E/RAB7A/CARD14/ZC3H12A/CPEB4/CALR/NR0B2/CASQ1/TRIM63/RAE1/IFITM1/RUNX1/RUNX3/IRS2/TNFRSF11A/ALDH1A2/SPHK1/HSPB3/CCR2/RSAD2/ADIPOQ/NUP93/RAPGEF2/FGF19/NR1H4 | 169 |
| GO:0098609 | cell-cell adhesion                                                           | 47/590  | 816/17046  | 0.00044 | 0.03275 | 0.02841 | CDH9/CDH12/PDPN/PKP3/FAT3/MAP3K8/CSTA/CYLD/DDOST/FAT2/FGA/NFASC/FLOT2/NPTN/HLA-DOA/HLA-DPA1/ZC3H12D/IGF1/IGF2/IL1RN/IRF1/ITGA7/ITGB2/ITGB7/JUP/AMIGO3/LCP1/LGALS9/NFATC3/PKHD1/APBB1P/FBLIM1/PARVA/PAG1/PCDHGB3/TENM2/NOD2/PCDH20/BMP4/ZEB1/CCR2/TNFRSF4/ZAP70/ESAM/RSAD2/CD8A/ADIPOQ                                                                                                                                                                                                                                                                                                                                                                                                                                                                                                                                                                                                                                                                                                                                                                                                     | 47  |

|            |                                         |         |            |         |         |         |                                                                                                                                                                                                                                                                                                                                                                                                                                                                                                                                                                                                                                                                                                                                                                                                                                                                                                                                                                                                                                                                                                                                                         |     |
|------------|-----------------------------------------|---------|------------|---------|---------|---------|---------------------------------------------------------------------------------------------------------------------------------------------------------------------------------------------------------------------------------------------------------------------------------------------------------------------------------------------------------------------------------------------------------------------------------------------------------------------------------------------------------------------------------------------------------------------------------------------------------------------------------------------------------------------------------------------------------------------------------------------------------------------------------------------------------------------------------------------------------------------------------------------------------------------------------------------------------------------------------------------------------------------------------------------------------------------------------------------------------------------------------------------------------|-----|
| GO:0012501 | programmed cell death                   | 85/590  | 1718/17046 | 0.00045 | 0.03278 | 0.02844 | GJB6/CHI3L1/EGLN2/CARD16/COMP/MAP3K8/ADM/IL131RA/CYLD/DBB1/ESR1/FGA/FGF10/FHIT/FOXC2/EPB41L3/DIP2A/PPP1R13B/ARHGEF18/RYPB/RNF144B/GAS2/BMP10/SOX8/HSP90AB1/ID3/IGF1/IL1RN/INHBA/IRF1/ITGB2/KDR/ARHGDI2/LGALS9/LMNA/MP2/PAFAH2/PARK2/UTP11L/PKHD1/PKM/PLAGL1/PML/PPP2R2B/MAPK3/PROC/PAK6/PSMD7/PTGFR/PLEKHG5/MARK4/SCT/NOD2/BMP4/BMPR1B/BOK/STK3/TERF1/TGM2/TNFAIP3/TNFRSF1A/TRAFF5/TNFRSF4/WNT10B/CARD14/BCL2L14/FAM188A/ZC3H12A/CPEB4/CLPTM1L/CALR/CAST/SCIN/TP63/RUNX3/IRS2/ACTN1/CRADD/ALDH1A2/SPHK1/MAP3K6/AURKB/DAPL1/ADIPOQ/RAPGEF2                                                                                                                                                                                                                                                                                                                                                                                                                                                                                                                                                                                                               | 85  |
| GO:0008643 | carbohydrate transport                  | 16/590  | 178/17046  | 0.00047 | 0.03419 | 0.02966 | NUP210/SLC37A4/GRB10/HK1/IGF1/AQP2/AQP5/AQP9/SIRT6/PRKAG3/LMBRD1/RAE1/IRS2/ADIPOQ/NUP93/FGF19                                                                                                                                                                                                                                                                                                                                                                                                                                                                                                                                                                                                                                                                                                                                                                                                                                                                                                                                                                                                                                                           | 16  |
| GO:0071345 | cellular response to cytokine stimulus  | 39/590  | 642/17046  | 0.00049 | 0.03474 | 0.03014 | CHI3L1/CCR1/IL131RA/CYP11A1/EIF4G1/FGA/SBNO2/NUP210/HLA-DPA1/HSP90AB1/IL1R1/IL1RN/IL10RA/IL11RA/IL12RB2/IL15RA/IRF1/LGALS9/OAS2/IL21R/PARK2/PML/MAPK3/PSMD7/CCL11/STAT2/BST2/TNFRSF1A/CCR2/TNFRSF4/CARD14/RAE1/IFITM1/TNFRSF11A/SPHK1/CCRL2/RSAD2/ADIPOQ/NUP93                                                                                                                                                                                                                                                                                                                                                                                                                                                                                                                                                                                                                                                                                                                                                                                                                                                                                          | 39  |
| GO:0042476 | odontogenesis                           | 12/590  | 112/17046  | 0.0005  | 0.03474 | 0.03014 | ADM/FGF10/ID3/RSP02/AQP5/INHBA/LHX8/PITX2/HTRA1/BGLAP/BMP4/TP63                                                                                                                                                                                                                                                                                                                                                                                                                                                                                                                                                                                                                                                                                                                                                                                                                                                                                                                                                                                                                                                                                         | 12  |
| GO:0046660 | female sex differentiation              | 12/590  | 112/17046  | 0.0005  | 0.03474 | 0.03014 | COL9A3/ESR1/FGF10/INHBA/KDR/LHCGR/LHX8/PITX2/STRA6/BMP4/BMPR1B/TP63                                                                                                                                                                                                                                                                                                                                                                                                                                                                                                                                                                                                                                                                                                                                                                                                                                                                                                                                                                                                                                                                                     | 12  |
| GO:0042592 | homeostatic process                     | 73/590  | 1434/17046 | 0.00053 | 0.03633 | 0.03152 | TRDN/GJB6/EGLN2/CHRNA1/CLN5/CCR1/ADM/IL131RA/CPS1/DBB1/BHLHA15/ABAT/ESR1/AKR1B1/NEDD4/SLC37A4/DFNB31/STEAP2/NPTN/AMPD3/FFAR2/HK1/NME9/IGF1/IL1R1/IL1RN/AQP2/AQP5/INHBA/AQP9/KCNH2/KDR/LDLR/LGALS9/NUBP1/ATP1A2/OPRL1/ATP5B/PARK2/SIRT6/PDE6B/PKHD1/PML/TLR9/SLC30A10/CHRNA9/PRKAR1B/SLAMF8/RFC2/RPA3/BGLAP/CCL11/ABHD4/NOD2/BMP4/SLC4A1/SLC8A1/SLC9A3/TERF1/TGM2/TNFAIP3/TRPC6/CCR2/CA7/CACNA1E/RAB7A/CALR/ATP13A4/CASQ1/TP63/IRS2/TNFRSF11A/ADIPOQ                                                                                                                                                                                                                                                                                                                                                                                                                                                                                                                                                                                                                                                                                                     | 73  |
| GO:1901698 | response to nitrogen compound           | 53/590  | 961/17046  | 0.00054 | 0.03646 | 0.03163 | TMED10/CHRNA1/CHRNA2/AP3S1/ADM/CPS1/CYP11A1/ABAT/AGXT/EIF4G1/FGA/FGF10/FOXC2/AKR1B1/GATM/FGF22/GRB10/NR4A1/HRH1/HTR3A/IGF2/IL1R1/IL1RN/AQP9/JUP/PKCNJ8/IPO5/ATP1A2/NRAS/PARK2/PKM/PRKAG3/TLR9/SSH1/CHRNA9/PRKAR1B/LMBRD1/MAPK3/MAP2K2/PSMD7/PTPRE/NOD2/BMP4/SLC8A1/ZEB1/TNFAIP3/WNT10B/CPEB4/IRS2/ADIPOQ/RAPGEF2/FGF19/NR1H4                                                                                                                                                                                                                                                                                                                                                                                                                                                                                                                                                                                                                                                                                                                                                                                                                            | 53  |
| GO:0050793 | regulation of developmental process     | 94/590  | 1953/17046 | 0.00055 | 0.03646 | 0.03163 | PDPN/CELF1/LECT1/CHI3L1/CCR1/SEZ6/ADM/FAM101A/SMYD1/SH3D19/CYLD/BHLHA15/DIO3/DMBT1/EIF4G1/EPHA1/ESR1/FGA/FGF10/FOXC2/EPB41L3/FLOT2/NEDD4/ARHGEF18/GAS2/NPTN/BMP10/SOX8/HLA-DOA/ACACB/ID3/RSP02/IGF1/IL1RN/INHBA/IRF1/ITGA7/ITGB2/JUP/KDR/AMIGO3/HES5/LAMA3/ARHGDI2/LGALS9/LMNA/MITF/NEU1/NPPC/NRAS/PARK2/ATP8A2/PLA2G2A/PML/SSH1/FBLIM1/PALMD/PARVA/IFT122/MAP2K2/CDC42SE1/ERMN/BGLAP/CCL11/VP33A/BMP4/SLC8A1/BMPR1B/SLIT1/STK3/SUPT6H/ZEB1/TEAD3/TNFAIP3/TNFRSF1A/CCR2/WNT10B/ZAP70/LST1/ZC3H12A/CALR/CAPZB/HOPX/TTBK1/IFITM1/SCIN/RUNX1/TP63/RUNX3/SPHK1/PIAS2/CBFA2T2/ADIPOQ/RAPGEF2                                                                                                                                                                                                                                                                                                                                                                                                                                                                                                                                                                 | 94  |
| GO:0010243 | response to organonitrogen compound     | 50/590  | 893/17046  | 0.00055 | 0.03646 | 0.03163 | TMED10/CHRNA1/CHRNA2/AP3S1/ADM/CPS1/CYP11A1/ABAT/AGXT/EIF4G1/FGA/FGF10/FOXC2/AKR1B1/GATM/FGF22/GRB10/NR4A1/HRH1/HTR3A/IGF2/IL1RN/AQP9/JUP/IPO5/ATP1A2/NRAS/PARK2/PKM/PRKAG3/TLR9/SSH1/CHRNA9/PRKAR1B/LMBRD1/MAPK3/MAP2K2/PSMD7/PTPRE/NOD2/SLC8A1/ZEB1/TNFAIP3/WNT10B/CPEB4/IRS2/ADIPOQ/RAPGEF2/FGF19/NR1H4                                                                                                                                                                                                                                                                                                                                                                                                                                                                                                                                                                                                                                                                                                                                                                                                                                              | 50  |
| GO:0060439 | trachea morphogenesis                   | 4/590   | 12/17046   | 0.00056 | 0.0367  | 0.03184 | RSP02/MAPK3/MAP2K2/BMP4                                                                                                                                                                                                                                                                                                                                                                                                                                                                                                                                                                                                                                                                                                                                                                                                                                                                                                                                                                                                                                                                                                                                 | 4   |
| GO:1901700 | response to oxygen-containing compound  | 74/590  | 1462/17046 | 0.00057 | 0.0367  | 0.03184 | SPON2/GJB6/AP3S1/CNP/ADM/CPS1/CYP11A1/ABAT/AGXT/EIF4G1/ESR1/FGA/FGF10/SBNO2/FOXC2/AKR1B1/MLC1/GATM/FGF22/FFAR2/GRB10/NR4A1/HTR3A/IGF2/IL1R1/IL1RN/IL10RA/AQP2/IL12RB2/INHBA/AQP9/JUP/KCNJ8/IPO5/LGALS9/ATP1A2/NPPC/NRAS/OPRL1/P2RY6/PARK2/PKM/PRKAG3/TLR9/SSH1/PRKAR1B/LMBRD1/MAPK3/MAP2K2/PSMD7/PTGFR/PTPRE/BGLAP/NOD2/BMP4/SLC8A1/ZEB1/TNFAIP3/TRPC6/TRPM2/WNT10B/CACNA1E/ZC3H12A/CPEB4/CALR/NROB2/TRIM63/IRS2/TNFRSF11A/ALDH1A2/ADIPOQ/RAPGEF2/FGF19/NR1H4                                                                                                                                                                                                                                                                                                                                                                                                                                                                                                                                                                                                                                                                                           | 74  |
| GO:0009100 | glycoprotein metabolic process          | 28/590  | 413/17046  | 0.00058 | 0.03674 | 0.03187 | GNE/LECT1/GALNT15/SLC51B/NEU4/EGFLAM/PARP4/B3GLCT/MGAT5B/DDOST/TRAK1/FOXL1/STGALNAC3/GBGT1/SLC17A5/EOGT/IGF1/MUC21/MGAT1/NEU1/OAS2/SPOCK3/CST1/HST15/SIRT6/CSGALNACT1/BMPR1B/MOGS/CALR                                                                                                                                                                                                                                                                                                                                                                                                                                                                                                                                                                                                                                                                                                                                                                                                                                                                                                                                                                  | 28  |
| GO:0048522 | positive regulation of cellular process | 183/590 | 4283/17046 | 0.00059 | 0.03674 | 0.03187 | ABI1/CDKN1C/TRDN/PDPN/RER1/ESM1/CHI3L1/ERLIN2/CCR1/SLC51B/SEZ6/MAP3K8/ADM/IL131RA/EGFLAM/MIB2/MPP7/SMYD1/SH3D19/CYLD/DBB1/BHLHA15/DMBT1/ABAT/EIF2/EIF4G1/EPHA1/ESR1/FGA/FGF10/SBNO2/FOXC2/EXPH5/AKR1B1/FLOT2/NEDD4/PUM2/ARHGEF18/MAPK8IP2/VGLL2/RNF144B/PABPC1/DNAJC2/FGF22/NPTN/BMP10/GPR26/FFAR2/GRB10/GUCY1A3/SOX8/HK1/HLA-DPA1/ANXA13/NR4A1/ACACB/HRH1/HSPA1L/HSP90AB1/TFAP2E/ID3/RSP02/IGF1/IGF2/IL1RN/IL12RB2/FOXK2/INHBA/IRF1/JUP/KCNH2/KDR/IPO5/AMIGO3/HES5/STMN1/LCP1/LDLR/ARHGDI2/LGALS9/LHCGR/LMNA/LMO2/MC2R/MFNG/MITF/NEU1/NFATC3/NHLH2/NPPC/NRAS/OPRL1/P2RY6/PARK2/UTP11L/PRR16/SIRT6/ATP8A2/PITX2/PKHD1/PLA2G2A/PLAGL1/PML/TLR9/APBB1P/BANP/ELP3/GOLPH3L/FANCI/PRKAR1B/PAG1/MAPK3/MAP2K2/MRAP/HTRA1/PAK6/ARNTL2/REGMA/PSMD7/PTGFR/PLEKHG5/TENM2/MARK4/TRIM27/SCT/CCL11/NPAS3/NOD2/BMP4/ZNF649/SLC8A1/BMPR1B/BOK/STK3/SUPT6H/BST2/TCEB2/ZEB1/TEAD3/TERF1/TGM2/TNFAIP3/TNFRSF1A/TRAFF5/TRPC6/CCR2/TNFRSF4/WNT10B/ZAP70/CA7/RAB7A/CARD14/BCL2L14/CSPP1/ZC3H12A/CALR/NROB2/HOPX/IFITM1/SCIN/CDK10/RUNX1/TP63/RUNX3/IRS2/CRADD/TNFRSF11A/ALDH1A2/SPHK1/SKAP2/PRC1/PIAS2/MAP3K6/SYT7/CBFA2T2/RSAD2/AURKB/CD8A/ADIPOQ/MICAL2/RAPGEF2/FGF19/NR1H4 | 183 |

|            |                                              |         |            |         |         |         |                                                                                                                                                                                                                                                                                                                                                                                                                                                                                                                                                                                                                                                                                                                                                                                                                                                                                                                                                                                                                                                                           |     |
|------------|----------------------------------------------|---------|------------|---------|---------|---------|---------------------------------------------------------------------------------------------------------------------------------------------------------------------------------------------------------------------------------------------------------------------------------------------------------------------------------------------------------------------------------------------------------------------------------------------------------------------------------------------------------------------------------------------------------------------------------------------------------------------------------------------------------------------------------------------------------------------------------------------------------------------------------------------------------------------------------------------------------------------------------------------------------------------------------------------------------------------------------------------------------------------------------------------------------------------------|-----|
| GO:0048731 | system development                           | 173/590 | 4014/17046 | 0.00059 | 0.03674 | 0.03187 | ABI1/FARP1/CDKN1C/SPEG/SPON2/TACC2/PDPN/GJB6/TMED10/LECT1/ESM1/CHI3L1/CHRNA1/GPRIN1/CLN5/CCR1/SEZ6/CNP/COL9A3/COMP/ADM/IL31RA/CPS1/ZNF358/FAM10A1/CSTA/SMYD1/CYLD/ESCO2/CYP11A1/DLG2/EEF2/EFNA2/EIF4G1/EPHA1/ESR1/FGA/FGF10/BTBD3/SBNO2/FOXL1/FOXC2/EXPH5/AKR1B1/NFASC/EPB41L3/NEDD4L/PSD3/MAPK8IP2/VGLL2/DFNB31/LCE2B/GATM/FGF22/NPTN/BMP10/SOX8/HLA-DOA/NR4A1/ACACB/HOXC4/HSD11B1/HSP90AB1/ID3/RSPO2/IGF1/IGF2/LCE1C/LCE1D/LCE2D/AQP2/AQP5/INHBA/IRF1/ITGA7/IVL/JUP/KCNJ8/KDR/AMIGO3/HES5/STMN1/ARHGDI/LGALS9/LHCGR/LMNA/LMO2/MC2R/MITF/LHX8/MYL2/NEU1/NFATC3/NHLH2/NPPC/NRAS/ATP5B/PARK2/UTP11L/C11orf73/SIRT6/PDE6B/ATP8A2/PITX2/PKHD1/PKM/PLAGL1/PML/RIPPLY3/SSH1/MXR8/HERC6/ELP3/CHRNA9/PARVA/IFT122/CSGALNACT1/MAPK3/MAP2K2/HTRA1/RGMA/PSMD7/TENM2/MARK4/ACTA2/BGLAP/PTC/CCL11/STRA6/GZF1/VPS33A/BMP4/SLC8A1/BMPR1B/SLIT1/BOK/STK3/SUPT6H/ZEB1/TGM2/TCHH/TNFAIP3/TRPC6/CCR2/WNT10B/ZAP70/LST1/ZC3H12A/C6orf25/CALR/CAST/BFSP2/NROB2/CASQ1/HOPX/TTBK1/SCIN/RUNX1/TP63/RUNX3/IRS2/ACTN1/TNFRSF11A/ALDH1A2/SPHK1/CBFA2T2/RSAD2/CD8A/ADIPOQ/MICAL2/RAPGEF2/CD79A/FGF19 | 173 |
| GO:0009966 | regulation of signal transduction            | 110/590 | 2366/17046 | 0.00063 | 0.03856 | 0.03345 | FARP1/RCAN2/CDKN1C/LECT1/ESM1/CHI3L1/CCR1/SEZ6/TNFAIP8L1/MAP3K8/ADM/IL31RA/MIB2/MPP7/CYLD/ZNF366/A2M/ESR1/SPATA13/FGA/FGF10/FOXL1/AKR1B1/RHOBTB2/NEDD4L/PSD3/PUM2/ARHGEF18/MAPK8IP2/ALS2CL/FGF22/NPTN/CYTH4/BMP10/GRB10/HSP90AB1/RSPO2/IGF1/IGF2/IL1RN/INHBA/IRF1/JUP/KDR/HES5/ARHGDI/LGALS9/LHCGR/LMNA/MCC/MFNG/PLEKHG7/NRAS/PARK2/PDE6B/PKHD1/PLA2G2A/PML/TLR9/PPP1CB/IFT122/LMBRD1/PAG1/MAPK3/MAP2K2/HTRA1/PAK6/PSMD7/PLEKHG5/PTPRE/RGS12/CCL11/NOD2/ARHGAP9/TMEM237/BMP4/BMPR1B/STAT2/STK3/BST2/ZEB1/TNFAIP3/TNFRSF1A/TRAF5/WNT10B/ZAP70/RAB7A/CARD14/BCL2L14/CALR/CMAHP/CDK10/RUNX1/TP63/RUNX3/IRS2/CRADD/TNFRSF11A/SPHK1/SKAP2/STARD13/PIAS2/MAP3K6/RSAD2/CD8A/TRIP10/ADIPOQ/RAPGEF2/IQSEC1/FGF19                                                                                                                                                                                                                                                                                                                                                                   | 110 |
| GO:0055082 | cellular chemical homeostasis                | 37/590  | 607/17046  | 0.00064 | 0.03865 | 0.03353 | TRDN/GJB6/CLN5/CCR1/ADM/ESR1/NEDD4L/NPTN/HK1/IL1R1/AQP2/AQP5/AQP9/NUBP1/ATP1A2/OPRL1/ATP5B/PDE6B/PKHD1/PML/SLC30A10/CHRNA9/SLAMF8/CCL11/BMP4/SLC4A1/SLC8A1/TGM2/TRPC6/CCR2/CA7/CACNA1E/RAB7A/CALR/ATP13A4/CASQ1/IRS2                                                                                                                                                                                                                                                                                                                                                                                                                                                                                                                                                                                                                                                                                                                                                                                                                                                      | 37  |
| GO:1900034 | regulation of cellular response to heat      | 9/590   | 70/17046   | 0.00066 | 0.03984 | 0.03456 | NUP210/DNAJC2/HSPA1L/HSP90AB1/C11orf73/MAPK3/RPA3/RAE1/NUP93                                                                                                                                                                                                                                                                                                                                                                                                                                                                                                                                                                                                                                                                                                                                                                                                                                                                                                                                                                                                              | 9   |
| GO:0010646 | regulation of cell communication             | 124/590 | 2731/17046 | 0.00068 | 0.04006 | 0.03475 | FARP1/RCAN2/CDKN1C/TRDN/LECT1/ESM1/CHI3L1/CCR1/SEZ6/TNFAIP8L1/MAP3K8/ADM/IL31RA/MIB2/MPP7/CYLD/ZNF366/ABAT/A2M/ESR1/SPATA13/FGA/FGF10/FOXL1/AKR1B1/RHOBTB2/NEDD4L/PSD3/PUM2/ARHGEF18/MAPK8IP2/ALS2CL/PNKD/FGF22/NPTN/CYTH4/BMP10/FFAR2/GRB10/HRH1/HSP90AB1/RSPO2/IGF1/IGF2/IL1RN/INHBA/IRF1/JUP/KDR/HES5/ARHGDI/LGALS9/LHCGR/LMNA/MCC/MFNG/PLEKHG7/ATP1A2/NRAS/PARK2/PDE6B/PKHD1/PLA2G2A/PML/TLR9/PPP1CB/PRKAR1B/IFT122/LMBRD1/PAG1/MAPK3/MAP2K2/HTRA1/PAK6/PSMD7/PLEKHG5/PTPRE/RGS12/SCT/CCL11/NOD2/ARHGAP9/TMEM237/BMP4/SLC8A1/BMPR1B/STAT2/STK3/BST2/ZEB1/TNFAIP3/TNFRSF1A/TRAF5/WNT10B/ZAP70/CA7/CACNA1E/RAB7A/CARD14/BCL2L14/CALR/CMAHP/NROB2/CDK10/RUNX1/TP63/RUNX3/IRS2/CRADD/TNFRSF11A/SPHK1/SKAP2/STARD13/PIAS2/MAP3K6/SYT7/RSAD2/CD8A/TRIP10/ADIPOQ/RAPGEF2/IQSEC1/FGF19                                                                                                                                                                                                                                                                                        | 124 |
| GO:0001763 | morphogenesis of a branching structure       | 17/590  | 203/17046  | 0.00072 | 0.04146 | 0.03597 | ADM/ESR1/FGF10/FOXC2/SOX8/RSPO2/IGF1/KDR/NFATC3/PITX2/PML/ERMN/CCL11/GZF1/BMP4/TGM2/TP63                                                                                                                                                                                                                                                                                                                                                                                                                                                                                                                                                                                                                                                                                                                                                                                                                                                                                                                                                                                  | 17  |
| GO:0005975 | carbohydrate metabolic process               | 47/590  | 835/17046  | 0.00072 | 0.04146 | 0.03597 | GENE/CHI3L1/CHI3L2/GALNT15/CLN5/SLC51B/NEU4/CPS1/PARP4/B3GLCT/MGAT5B/DDOST/ENO2/TRAK1/AKR1B1/NUP210/SLC37A4/ST6GALNAC3/GBGT1/SLC17A5/DHHD/EOGT/GRB10/HAS1/HK1/HRH1/IGF1/IGF2/MUC21/LHCGR/MGAT1/NEU1/OAS2/PARK2/CHST15/SIRT6/PKM/PRKAG3/PPP1CB/CSGALNACT1/MOGS/CALR/RAE1/IRS2/STBD1/ADIPOQ/NUP93                                                                                                                                                                                                                                                                                                                                                                                                                                                                                                                                                                                                                                                                                                                                                                           | 47  |
| GO:0023051 | regulation of signaling                      | 122/590 | 2685/17046 | 0.00073 | 0.04146 | 0.03597 | FARP1/RCAN2/CDKN1C/TRDN/LECT1/ESM1/CHI3L1/CCR1/SEZ6/TNFAIP8L1/MAP3K8/ADM/IL31RA/MIB2/MPP7/CYLD/ZNF366/ABAT/A2M/ESR1/SPATA13/FGA/FGF10/FOXL1/AKR1B1/RHOBTB2/NEDD4L/PSD3/PUM2/ARHGEF18/MAPK8IP2/ALS2CL/PNKD/FGF22/NPTN/CYTH4/BMP10/FFAR2/GRB10/HRH1/HSP90AB1/RSPO2/IGF1/IGF2/IL1RN/INHBA/IRF1/JUP/KDR/HES5/ARHGDI/LGALS9/LHCGR/LMNA/MCC/MFNG/PLEKHG7/ATP1A2/NRAS/PARK2/PDE6B/PKHD1/PLA2G2A/PML/TLR9/PPP1CB/PRKAR1B/IFT122/LMBRD1/PAG1/MAPK3/MAP2K2/HTRA1/PAK6/PSMD7/PLEKHG5/PTPRE/RGS12/SCT/CCL11/NOD2/ARHGAP9/TMEM237/BMP4/BMPR1B/STAT2/STK3/BST2/ZEB1/TNFAIP3/TNFRSF1A/TRAF5/WNT10B/ZAP70/CA7/CACNA1E/RAB7A/CARD14/BCL2L14/CALR/CMAHP/NROB2/CDK10/RUNX1/TP63/RUNX3/IRS2/CRADD/TNFRSF11A/SPHK1/SKAP2/STARD13/PIAS2/MAP3K6/SYT7/RSAD2/CD8A/TRIP10/ADIPOQ/RAPGEF2/IQSEC1/FGF19                                                                                                                                                                                                                                                                                               | 122 |
| GO:0002694 | regulation of leukocyte activation           | 27/590  | 399/17046  | 0.00074 | 0.04146 | 0.03597 | MAP3K8/IL31RA/CYLD/FGF10/FLOT2/HLA-DOA/HLA-DPA1/ZC3H12D/IGF1/IGF2/INHBA/IRF1/LGALS9/PAG1/PTPRE/NOD2/BMP4/BPI/SUPT6H/ZEB1/TNFAIP3/CCR2/TNFRSF4/ZAP70/LST1/ZC3H12A/IRS2                                                                                                                                                                                                                                                                                                                                                                                                                                                                                                                                                                                                                                                                                                                                                                                                                                                                                                     | 27  |
| GO:0014070 | response to organic cyclic compound          | 44/590  | 768/17046  | 0.00074 | 0.04146 | 0.03597 | CHRNA1/CHRNA2/ADM/CPS1/CYP11A1/ZNF366/ABAT/AGXT/ESR1/FGA/FGF10/MLC1/GUCY1A3/NR4A1/HRH1/HSP90AB1/HTR3A/IL1RN/INHBA/AQP9/JUP/KCNJ8/ATP1A2/OPRL1/P2RY6/PARK2/SSH1/CHRNA9/MAPK3/PTGFR/BGLAP/NOD2/BMP4/SLC8A1/SLC9A3/WNT10B/CALR/NROB2/TRIM63/RAE1/ALDH1A2/ADIPOQ/RAPGEF2/NR1H4                                                                                                                                                                                                                                                                                                                                                                                                                                                                                                                                                                                                                                                                                                                                                                                                | 44  |
| GO:0009607 | response to biotic stimulus                  | 47/590  | 837/17046  | 0.00076 | 0.04146 | 0.03597 | SPON2/GJB6/HNRNPUL1/CHGA/CNP/ADM/CPS1/CYP11A1/DMBT1/FGA/FGF10/SBNO2/PUM2/SLC37A4/GUCY1A3/IL1RN/IL10RA/IL12RB2/IRF1/KCNJ8/STMN1/LGALS9/OAS2/PLA2G2A/PML/TLR9/TREM1/MAPK3/HTRA1/SLAMF8/PTGFR/CREBZF/ACTA2/CCL11/NOD2/BPI/STAT2/BST2/TNFAIP3/TNFRSF1A/CA7/ZC3H12A/IFITM1/TNFRSF11A/RSAD2/CD8A/NUP93                                                                                                                                                                                                                                                                                                                                                                                                                                                                                                                                                                                                                                                                                                                                                                          | 47  |
| GO:0043031 | negative regulation of macrophage activation | 3/590   | 6/17046    | 0.00076 | 0.04146 | 0.03597 | IL31RA/BPI/ZC3H12A                                                                                                                                                                                                                                                                                                                                                                                                                                                                                                                                                                                                                                                                                                                                                                                                                                                                                                                                                                                                                                                        | 3   |

|            |                                              |        |            |         |         |         |                                                                                                                                                                                                                                                                                                                                                                                                                                                                                                                                  |    |
|------------|----------------------------------------------|--------|------------|---------|---------|---------|----------------------------------------------------------------------------------------------------------------------------------------------------------------------------------------------------------------------------------------------------------------------------------------------------------------------------------------------------------------------------------------------------------------------------------------------------------------------------------------------------------------------------------|----|
| GO:0002695 | negative regulation of leukocyte activation  | 13/590 | 134/17046  | 0.00077 | 0.04146 | 0.03597 | IL31RA/CYLD/ZC3H12D/INHBA/IRF1/LGALS9/PAG1/BMP4/BPI/TNFAIP3/CCR2/LST1/ZC3H12A                                                                                                                                                                                                                                                                                                                                                                                                                                                    | 13 |
| GO:0046649 | lymphocyte activation                        | 34/590 | 548/17046  | 0.00077 | 0.04146 | 0.03597 | MAP3K8/CYLD/DDOST/FGF10/FLOT2/HLA-DOA/HLA-DPA1/ZC3H12D/IGF1/IGF2/INHBA/IRF1/ITGB2/LCP1/LGALS9/NFATC3/IL21R/APBB1IP/PAG1/NOD2/BMP4/SUPT6H/BST2/ZEB1/TNFAIP3/CCR2/TNFRSF4/ZAP70/LST1/IRS2/SKAP2/RSAD2/CD8A/CD79A                                                                                                                                                                                                                                                                                                                   | 34 |
| GO:0006915 | apoptotic process                            | 83/590 | 1700/17046 | 0.00078 | 0.04175 | 0.03622 | GJB6/CHI3L1/EGLN2/CARD16/COMP/MAP3K8/ADM/IL31RA/CYLD/DBB1/ESR1/FGA/FGF10/FHIT/FOXC2/EPB41L3/DIP2A/PPP1R13B/ARHGFE18/RYPB/RNF144B/GAS2/BMP10/SOX8/HSP90AB1/ID3/IGF1/IL1RN/INHBA/IRF1/ITGB2/KDR/ARHGDI1A/LGALS9/LMNA/MP2/PAFAH2/PARK2/UTP11L/PKHD1/PLAGL1/PML/PPP2R2B/MAPK3/PROC/PAK6/PSMD7/PTGFR/PLEKHG5/SCT/NOD2/BMP4/BMPR1B/BOK/STK3/TERF1/TGM2/TNFAIP3/TNFRSF1A/TRAFF5/TNFRSF4/WNT10B/CARD14/BCL2L14/FAM188A/ZC3H12A/CPEB4/CLPTM1L/CALR/CAS/T/SCIN/TP63/RUNX3/IRS2/ACTN1/CRADD/ALDH1A2/SPHK1/MAP3K6/AURKB/DAPL1/ADIPOQ/RAPGEF2 | 83 |
| GO:0048286 | lung alveolus development                    | 7/590  | 45/17046   | 0.00083 | 0.04378 | 0.03798 | PDPN/FGF10/IGF1/KDR/STRA6/BMP4/HOPX                                                                                                                                                                                                                                                                                                                                                                                                                                                                                              | 7  |
| GO:0043067 | regulation of programmed cell death          | 67/590 | 1314/17046 | 0.00087 | 0.04516 | 0.03918 | EGLN2/CARD16/COMP/MAP3K8/ADM/IL31RA/CYLD/DBB1/ESR1/FGA/FGF10/FOXC2/DIP2A/ARHGFE18/BMP10/SOX8/HSP90AB1/ID3/IGF1/IL1RN/INHBA/KDR/ARHGDI1A/LGALS9/LMNA/MITF/MPZ/PAFAH2/PARK2/UTP11L/PKHD1/PML/PROC/PAK6/PSMD7/PTGFR/PLEKHG5/MARK4/SCT/NOD2/BMP4/BMPR1B/BOK/STK3/TERF1/TGM2/TNFAIP3/TRAFF5/TNFRSF4/WNT10B/CARD14/BCL2L14/CPEB4/CALR/CAST/SCIN/TP63/RUNX3/IRS2/ACTN1/CRADD/ALDH1A2/SPHK1/MAP3K6/AURKB/ADIPOQ/RAPGEF2                                                                                                                  | 67 |
| GO:1901137 | carbohydrate derivative biosynthetic process | 42/590 | 729/17046  | 0.00087 | 0.04516 | 0.03918 | GNE/ACOT7/GALNT15/SLC51B/NEU4/ADM/PARP4/B3GLCT/MGAT5B/DDOST/TRAK1/FOXO1/ST6GALNAC3/GBGT1/SLC17A5/AMPD3/EOGT/GUCY1A3/HAS1/ACACB/NME9/IGF1/MUC21/LHCGR/MC2R/MGAT1/NEU1/NPPC/OAS2/OPRL1/ATP5B/CHST15/SIRT6/PKM/CSGALNACT1/MRAP/SCT/BMPR1B/CCR2/MOGS/CALR/QTRT1                                                                                                                                                                                                                                                                      | 42 |
| GO:0061138 | morphogenesis of a branching epithelium      | 16/590 | 189/17046  | 0.00091 | 0.04523 | 0.03924 | ADM/ESR1/FGF10/FOXC2/SOX8/RSPO2/IGF1/KDR/NFATC3/PITX2/PML/CCL11/GZF1/BMP4/TGM2/TP63                                                                                                                                                                                                                                                                                                                                                                                                                                              | 16 |
| GO:0071417 | cellular response to organonitrogen compound | 37/590 | 619/17046  | 0.00091 | 0.04523 | 0.03924 | AP3S1/CPS1/CYP11A1/EIF4G1/FGF10/FOXC2/AKR1B1/FGF22/GRB10/NR4A1/HRH1/IGF2/IL1RN/AQP9/JUP/IPO5/NRAS/PARK2/PRKAG3/TLR9/SSH1/PRKAR1B/LMBRD1/MAPK3/MAP2K2/PSMD7/PTPRE/NOD2/SLC8A1/ZEB1/WNT10B/CPEB4/IRS2/ADIPOQ/RAPGEF2/FGF19/NR1H4                                                                                                                                                                                                                                                                                                   | 37 |
| GO:0001775 | cell activation                              | 48/590 | 868/17046  | 0.00093 | 0.04523 | 0.03924 | CHGA/MAP3K8/IL31RA/CYLD/DDOST/A2M/FGA/FGF10/SBNO2/FLOT2/SCG3/HLA-DOA/HLA-DPA1/ZC3H12D/IGF1/IGF2/INHBA/IRF1/ITGB2/LCP1/LGALS9/NFATC3/IL21R/APBB1IP/PAG1/MAPK3/SLURP1/PTPRE/NOD2/BMP4/BPI/SUPT6H/BST2/ZEB1/TNFAIP3/TRPC6/CCR2/TNFRSF4/ZAP70/LST1/ZC3H12A/CAST/IRS2/ACTN1/SKAP2/RSAD2/CD8A/CD79A                                                                                                                                                                                                                                    | 48 |
| GO:0061061 | muscle structure development                 | 34/590 | 554/17046  | 0.00093 | 0.04523 | 0.03924 | SPEG/CHRNA1/ADM/SMYD1/BHLHA15/FGF10/FOXC2/FLOT2/SYNE1/VGLL2/BMP10/TMOD4/SOX8/ID3/IGF1/IGF2/ITGA7/LMNA/MYL2/NFATC3/NRAS/SIRT6/PITX2/PLAGL1/STRA6/BMP4/SLC8A1/SUPT6H/ZEB1/WNT10B/CALR/CAST/CASQ1/HOPX                                                                                                                                                                                                                                                                                                                              | 34 |
| GO:0009101 | glycoprotein biosynthetic process            | 25/590 | 364/17046  | 0.00093 | 0.04523 | 0.03924 | GNE/GALNT15/SLC51B/NEU4/PARP4/B3GLCT/MGAT5B/DDOST/TRAK1/FOXO1/ST6GALNAC3/GBGT1/SLC17A5/EOGT/IGF1/MUC21/MGAT1/NEU1/OAS2/CHST15/SIRT6/CSGALNACT1/BMPR1B/MOGS/CALR                                                                                                                                                                                                                                                                                                                                                                  | 25 |
| GO:0070374 | positive regulation of ERK1 and ERK2 cascade | 14/590 | 154/17046  | 0.00094 | 0.04523 | 0.03924 | CHI3L1/CCR1/FGA/FGF10/KDR/LGALS9/PLA2G2A/MAPK3/CCL11/NOD2/BMP4/TNFRSF11A/RAPGEF2/FGF19                                                                                                                                                                                                                                                                                                                                                                                                                                           | 14 |
| GO:0030036 | actin cytoskeleton organization              | 32/590 | 511/17046  | 0.00094 | 0.04523 | 0.03924 | ABI1/FAM101A/EPHA1/PHACTR1/FGF10/MSRB2/EPB41L3/ARHGFE18/PLEK2/BMP10/TMOD4/LCP1/MYL2/PARK2/SSH1/PARVA/TTC17/PAK6/ERMN/TRIM27/CCL11/PARVG/BST2/CALR/CAPZB/ANTXR1/CASQ1/SCIN/ACTN1/TRIP10/MICAL2/IQSEC1                                                                                                                                                                                                                                                                                                                             | 32 |
| GO:0044264 | cellular polysaccharide metabolic process    | 10/590 | 89/17046   | 0.001   | 0.04737 | 0.04109 | CPS1/GRB10/HAS1/IGF1/IGF2/PRKAG3/PPP1CB/CSGALNACT1/IRS2/STBD1                                                                                                                                                                                                                                                                                                                                                                                                                                                                    | 10 |
| GO:0034637 | cellular carbohydrate biosynthetic process   | 9/590  | 74/17046   | 0.001   | 0.04737 | 0.04109 | AKR1B1/GRB10/HAS1/IGF1/IGF2/PRKAG3/PPP1CB/CSGALNACT1/IRS2                                                                                                                                                                                                                                                                                                                                                                                                                                                                        | 9  |

|            |                                               |           |            |         |          |         |                                                                                                                                                                                                                                                                                                                                                                                                                                |       |
|------------|-----------------------------------------------|-----------|------------|---------|----------|---------|--------------------------------------------------------------------------------------------------------------------------------------------------------------------------------------------------------------------------------------------------------------------------------------------------------------------------------------------------------------------------------------------------------------------------------|-------|
| GO:0070371 | ERK1 and ERK2 cascade                         | 18/590    | 228/17046  | 0.00101 | 0.04737  | 0.04109 | CHI3L1/CCR1/FGA/FGF10/IGF1/KDR/LGALS9/PKHD1/PLA2G2A/MAPK3/MAP2K2/CCL11/NOD2/BMP4/TNFRSF11A/ADIPOQ/RAPGEF2/FGF19                                                                                                                                                                                                                                                                                                                | 18    |
| GO:0008219 | cell death                                    | 87/590    | 1816/17046 | 0.00104 | 0.04796  | 0.04161 | GJB6/CHI3L1/EGLN2/CARD16/COMP/MAP3K8/ADM/IL31RA/PARP4/CYLD/DBB1/ESR1/FGA/FGF10/FHIT/FOXC2/EPB41L3/DIP2A/PPP1R13B/ARHGGEF18/RYPB/RNF144B/GAS2/CLUL1/BMP10/SOX8/HSP90AB1/ID3/IGF1/IL1RN/INHBA/IRF1/ITGB2/KDR/ARHGDI1/LGALS9/LMNA/MPZ/PAFAH2/PARK2/UTP11L/PKHD1/PKM/PLAGL1/PML/PPP2R2B/MAPK3/PROC/P                                                                                                                               | 87    |
| GO:0016265 | death                                         | 87/590    | 1816/17046 | 0.00104 | 0.04796  | 0.04161 | AK6/PSMD7/PTGFR/PLEKHG5/MARK4/SCT/NOD2/BMP4/BMPR1B/BOK/STK3/TERF1/TGM2/TNFAIP3/TNFRSF1A/TRAF5/TNFRSF4/WNT10B/CARD14/BCL2L14/FAM188A/ZC3H12A/CPEB4/CLPTM1L/CALR/CAST/SCIN/TP63/RUNX3/IRS2/ACTN1/CRADD/ALDH1A2/SPHK1/MAP3K6/AURKB/DAPL1/ADIPOQ/RAPGEF2                                                                                                                                                                           | 87    |
| GO:0044281 | small molecule metabolic process              | 109/590   | 2375/17046 | 0.00106 | 0.04833  | 0.04192 | GJB6/CHI3L1/EGLN2/CARD16/COMP/MAP3K8/ADM/IL31RA/PARP4/CYLD/DBB1/ESR1/FGA/FGF10/FHIT/FOXC2/EPB41L3/DIP2A/PPP1R13B/ARHGGEF18/RYPB/RNF144B/GAS2/CLUL1/BMP10/SOX8/HSP90AB1/ID3/IGF1/IL1RN/INHBA/IRF1/ITGB2/KDR/ARHGDI1/LGALS9/LMNA/MPZ/PAFAH2/PARK2/UTP11L/PKHD1/PKM/PLAGL1/PML/PPP2R2B/MAPK3/PROC/P                                                                                                                               | 109   |
| GO:0071320 | cellular response to cAMP                     | 7/590     | 47/17046   | 0.00108 | 0.04921  | 0.04269 | AK6/PSMD7/PTGFR/PLEKHG5/MARK4/SCT/NOD2/BMP4/BMPR1B/BOK/STK3/TERF1/TGM2/TNFAIP3/TNFRSF1A/TRAF5/TNFRSF4/WNT10B/CARD14/BCL2L14/FAM188A/ZC3H12A/CPEB4/CLPTM1L/CALR/CAST/SCIN/TP63/RUNX3/IRS2/ACTN1/CRADD/ALDH1A2/SPHK1/MAP3K6/AURKB/DAPL1/ADIPOQ/RAPGEF2                                                                                                                                                                           | 7     |
| GO:0001503 | ossification                                  | 24/590    | 348/17046  | 0.0011  | 0.04965  | 0.04307 | GNE/MTHFS/PDPN/ERLIN2/EGLN2/ACOT7/CNP/NEU4/ADM/EGFLAM/CPS1/NDUF6/CRABP1/B3GLCT/PPM1L/MBOAT1/CYP11A1/DIO3/DLG2/ABAT/AGXT/ENO2/FAH/FHIT/AKR1B1/NUP210/SLC37A4/PNKD/ACOT11/GATM/PDE7B/AMPD3/DHHD/THM5/GRB10/DNAJC15/GUCY1A3/PADI1/HAS1/HK1/ACACB/HRH1/HSD11B1/NME9/IGF1/IGF2/IL1RN/INPP5A/LDLR/LHCGR/MC2R/ME2/MGAT1/MOCS1/MYH4/NUBP1/NDUF8/NEU1/ATP1A2/NPPC/OAS2/OPRL1/ATP5B/PARK2/SPOCK3/CHST15/PCYOX1/SIRT6/PDE6B/PKM/PLA2G2A/P | 24    |
|            |                                               |           |            |         |          |         | 2/RSAD2                                                                                                                                                                                                                                                                                                                                                                                                                        |       |
|            |                                               |           |            |         |          |         |                                                                                                                                                                                                                                                                                                                                                                                                                                |       |
|            | <b>Hypomethylated DMC, Cellular Component</b> |           |            |         |          |         |                                                                                                                                                                                                                                                                                                                                                                                                                                |       |
|            | Description                                   | GeneRatio | BgRatio    | pvalue  | p.adjust | qvalue  | geneID                                                                                                                                                                                                                                                                                                                                                                                                                         | Count |

|            |                        |         |             |          |          |          |                                                                                                                                                                                                                                                                                                                                                                                                                                                                                                                                                                                                                                                                                                                                                                                                                                                                                                                                                                                                                                                                                                                                                                                                                                                                                                                                                                                                                                                                                                                                                                                                                                                                                                                                                                                                                                                                                                                                                                                                                                                                                                                                                                                                                                                                                                                                                                                                                                                                                                                                                                                                                                                                                                                                                                                                                                                                                                                                                                                                                                                                                                                                                                                                                                                                                                                                                                                                                                                                                                                                                                                                                                                                                                                                                                                                                                                                                                                                                                                                                                                                                                                                                                                                            |     |
|------------|------------------------|---------|-------------|----------|----------|----------|------------------------------------------------------------------------------------------------------------------------------------------------------------------------------------------------------------------------------------------------------------------------------------------------------------------------------------------------------------------------------------------------------------------------------------------------------------------------------------------------------------------------------------------------------------------------------------------------------------------------------------------------------------------------------------------------------------------------------------------------------------------------------------------------------------------------------------------------------------------------------------------------------------------------------------------------------------------------------------------------------------------------------------------------------------------------------------------------------------------------------------------------------------------------------------------------------------------------------------------------------------------------------------------------------------------------------------------------------------------------------------------------------------------------------------------------------------------------------------------------------------------------------------------------------------------------------------------------------------------------------------------------------------------------------------------------------------------------------------------------------------------------------------------------------------------------------------------------------------------------------------------------------------------------------------------------------------------------------------------------------------------------------------------------------------------------------------------------------------------------------------------------------------------------------------------------------------------------------------------------------------------------------------------------------------------------------------------------------------------------------------------------------------------------------------------------------------------------------------------------------------------------------------------------------------------------------------------------------------------------------------------------------------------------------------------------------------------------------------------------------------------------------------------------------------------------------------------------------------------------------------------------------------------------------------------------------------------------------------------------------------------------------------------------------------------------------------------------------------------------------------------------------------------------------------------------------------------------------------------------------------------------------------------------------------------------------------------------------------------------------------------------------------------------------------------------------------------------------------------------------------------------------------------------------------------------------------------------------------------------------------------------------------------------------------------------------------------------------------------------------------------------------------------------------------------------------------------------------------------------------------------------------------------------------------------------------------------------------------------------------------------------------------------------------------------------------------------------------------------------------------------------------------------------------------------------------------|-----|
| GO:0005575 | cellular_compone<br>nt | 617/617 | 16277/17046 | 2.49E-13 | 1.47E-10 | 1.37E-10 | <p>AKT3/ABI1/TANK/SMIM6/CD300LD/GNE/ZNF783/CDH9/CDH12/SUGP2/FARP1/KLRG1/RCAN2/CDKN1C/SPEG/MRV1/TRDN/SPON2/COG5/PITRM1/TACC2/MTHFS/PDPN/CELFI1/GJ<br/>B6/PNRC1/TMED10/LECT1/RER1/ESM1/ADAM29/HNRNPUL1/RPP14/CHGA/CHI3L1/ERLIN2/CHI3L2/PKP3/EGLN2/ATXN2L/KIF12/ACOT7/EXOC3/CHRNA1/CHRNA2/GPRIN1/SORCS<br/>1/C1QTNF7/GBP4/PANX3/RBP7/GALNT15/AP351/C10orf90/FAT3/CLN5/MRPL52/CCR1/SLC51B/SPATA33/SEZ6/TNFAIP8L1/MOB3A/CNP/NEU4/COL9A3/COMP/MAP3K8/ADM/IL3<br/>1RA/EGFLAM/UBLCP1/HUS1B/C7orf34/OR2A14/CPM/CP51/NDUFAG6/PXDNL/CRABP1/ZNF358/MI82/PARP4/MPP7/LDLRAD3/FAM101A/B3GLCT/CEP128/MGAT5B/CSTA/KLC3/ZN<br/>F738/ABCC13/XKR3/SMYD1/SGOL1/PPM1L/SH3D19/CYLD/MBOAT1/ANKRD46/ESCO2/CYP11A1/ZNF782/CALML6/DBB1/DDOST/ZNF366/BHLHA15/PPP1R18/DIO3/DLG2/DMBT1/<br/>DNAH6/ABAT/DPH1/DTNA/AGXT/EEF2/EFNA2/EIF4G1/A2M/ELK4/ANKRD23/LIPH/SLC10A4/SMIM14/ENO2/ADCK5/EPHA1/ESR1/F11/FAT2/SPATA13/PRSS54/FCGR2A/PHACT<br/>R1/FGA/FGF10/FHIT/BTBD3/SBNO2/TRAK1/MSRB2/FOXL1/FOXC2/EXPH5/AKR1B1/NFASC/EPB41L3/GGA3/DIP2A/FLOT2/MLC1/TBC1D1/RHOBTB2/NUP210/NEDD4L/SYNE1/PSD3/<br/>PPP1R13B/PUM2/ARHGEF18/RYPB/MORC3/MAPK8IP2/TSSK2/VGLL2/SLC37A4/RASGEF1C/RNF144B/ZNF549/CCDC110/ST6GALNAC3/TMEM151A/SAMM50/DFNB31/ALS2CL/PNK<br/>D/SEC31B/ACOT11/RAI14/STEAP2/GAS2/FBXL21/LCE2B/SACS/GATM/GBGT1/PLEK2/SLC17A5/ADGRF1/RPS6K1/PABPC1/AKAP8L/DNAJC2/FGF22/NPTN/CLUL1/PDE7B/CYTH4/AM<br/>PD3/DHHD/BMP10/ZNF638/ZNF311/TMPRSS12/ZNF844/THEM5/GPR26/EOGT/FFAR2/TRIM42/GRB10/MRPS18B/GRIK4/DNAJC15/SCG3/TMOD4/GUCY1A3/GPR132/PADI1/HAS1/<br/>SOX8/HK1/HLA-DOA/HLA-<br/>DPA1/ANXA13/NR4A1/ACACB/HOXC4/AGFG2/HRH1/HSD11B1/HSPA1L/HSP90AB1/HTR3A/DUPD1/ADAMTSL5/ANKRD45/TFAP2E/ID3/ZC3H12D/RSP02/CD300E/NME9/IGF1/IGF2<br/>/GPR142/LCE1C/LCE1D/LCE2D/IL1R1/IL1RN/IL10RA/AQP2/IL11RA/IL12RB2/IL15RA/PRSS41/IL16/FOXK2/AQP5/INHBA/INPP5A/IRF1/AQP9/ITGA7/ITGB7/ITIH4/IVL/JUP/CD8<br/>2/USP50/KCNH2/KCNJ8/KCNJ9/KCNMB1/KDR/KIF25/IPO5/AMIGO3/CLEC17A/HES5/AF3/LAIR2/LAMA3/STMN1/OR2A5/LCP1/MUC21/LDLR/ARHGDI2/LGALS9/LHCGR/C11orf87/L<br/>MNA/LMO2/RAB19/LPP/MC2R/MCC/ME2/MFNG/MGAT1/SCGB2A1/MITF/LHX8/ASGR1/MOCS1/MOV10/MPZ/IGFL4/MYH4/MYL2/NUBP1/NDUFB4/DRG1/NEU1/ATP1A2/NFATC3<br/>/NHLH2/NPPC/NRAS/OAS2/OPRL1/OR2C1/OR3A2/SLC22A18/P2RY6/PAFAH2/ATP5B/IL21R/ANO7/PARK2/SPOCK3/BOLA1/UTP11L/CHST15/PCYOX1/C11orf73/SIRT6/PDE6B/HIGD<br/>1B/ATP8A2/PI3/PITX2/PKH1/PKM/PLA2G2A/PLAGL1/LRP1B/PRKAG3/PML/RIPPLY3/FXYD6/GPR84/SLCO1C1/PNLIP/TLR9/TREM1/SSH1/RIN2/POU2AF1/APBB11P/MXR8/FBLIM1<br/>/MED18/PALMD/CYP2W1/RPP25/BANP/PPP1CB/HERC6/ELP3/DNAJC17/GOLPH3L/PPP2R2B/FANCI/MOB1A/SLC47A1/SLC29A3/MIS18BP1/TRPV6/SLC30A10/CHRNA9/PEX26/FRM<br/>D4A/CARKD/PARVA/PRKAR1B/TTC17/IFT122/CFAP44/ERMARD/MCTP2/LMBRD1/CSGALNACT1/PAG1/CISD1/WSB2/MYNN/APOBR/MAPK3/MAP2K2/PCDHGB3/PRKRIR/PROC/MR<br/>AP/TRPV5/PRMT8/HTRA1/SLAMF8/CD42SE1/PAK6/ARNTL2/RGMA/CEACAM19/PRDM11/PSMD7/SLURP1/PTGFR/PLEKHG5/TENM2/GATAD2B/ERMN/RNF150/KLHL8/RDH14/MA<br/>RK4/PTPRE/CREBZF/FAM60A/ACTA2/RFC2/TRIM27/RGR/RGS12/RIT2/RPA3/BGLAP/SCT/CCL11/ABHD4/MRPS14/PRSS22/NPAS3/PARVG/NOD2/TINAGL1/STRA6/MAP1LC3B2/ARH<br/>GAP9/GZF1/DNAI2/CLDN25/PCDH20/TMEM237/VPS33A/BMP4/SLC4A1/SPATS2/ZNF649/ZG16/SLC6A12/SLC8A1/SLC9A3/SLC20A2/BMPR1B/SLIT1/BRD9/ZSCAN18/TMEM108/LY<br/>NX1/BOK/BPI/SRP68/STAT2/STK3/SUPT6H/BST2/TCEB2/ZEB1/TEAD3/TERF1/TGM2/TCHH/TNFAIP3/TNFRSF1A/TRAFF5/TRPC6/TRPM2/CCR2/TNFRSF4/UCP1/WNT10B/ZAP70/ZNF7<br/>/CA7/CACNA1E/MOGS/RAB7A/ERI3/CCDC86/CARD14/ESRG/BCL2L14/LST1/CERS4/IGFLR1/ZNF665/CSPP1/ERMP1/CALD1/PSCA/FAM188A/TMEM62/GPR157/ZC3H12A/FAAP100/<br/>CPEB4/C6orf25/ZNF436/CLPTM1L/CALR/COL21A1/KRTAP2-1/QTRT1/SLURP/CAST/CAPZB/CCDC3/DYNLRB2/SLC25A18/SPATA16/KRTAP17-<br/>1/ANTXR1/MFSD7/CMAHP/BFSP2/ATP13A4/YIPF4/ZNF397/NROB2/MON1A/CASQ1/HOPX/PARD6G/FAXC/KRBA1/TTBK1/RETNLB/TRIM63/GTPBP3/RAE1/C1orf198/PPFIBP2/SLC43<br/>A1/IFITM1/ITPRIP/SCIN/KMO/RUNX1/TP63/RUNX3/SERPINA6/IRS2/ACTN1/CRADD/TNFRSF11A/ALDH1A2/STK19/SYNN2/SPHK1/BUD31/CCNA1/ENDOU/SKAP2/STBD1/HSPB3/SLA<br/>MF9/TSPAN18/CH25H/CCRL2/ERI1/PRC1/STARD13/PIAS2/MAP3K6/SYT7/ESAM/SLC16A3/CBFA2T2/RSAD2/AURKB/CD8A/CCDC102A/TRIP10/ADIPOQ/ENTPD3/PREPL/RAB36/MIC<br/>AL2/N4BP1/VGLL4/NUP93/RAPGEF2/CD79A/KIAA0513/DAZAP2/ZBTB39/IQSEC1/LPGAT1/FGF19/NR1H4</p> | 617 |
| GO:0071944 | cell periphery         | 234/617 | 4563/17046  | 4.69E-10 | 1.38E-07 | 1.29E-07 | <p>AKT3/ABI1/CD300LD/CDH9/CDH12/FARP1/KLRG1/TRDN/PDPN/GJ86/TMED10/ADAM29/ERLIN2/PKP3/EXOC3/CHRNA1/CHRNA2/GPRIN1/PANX3/FAT3/CCR1/SLC51B/SEZ6/CNP/IL<br/>31RA/OR2A14/CPM/MPP7/LDLRAD3/CSTA/XKR3/SH3D19/CYLD/DIO3/DLG2/DTNA/EEF2/EFNA2/LIPH/SLC10A4/ENO2/EPHA1/ESR1/F11/FAT2/SPATA13/FCGR2A/FGA/FGF10/NFAS<br/>C/EPB41L3/FLOT2/MLC1/RHOBTB2/NEDD4L/SYNE1/PSD3/PPP1R13B/RAI14/STEAP2/LCE2B/PLEK2/SLC17A5/ADGRF1/NPTN/CYTH4/GPR26/FFAR2/GRB10/GRIK4/GUCY1A3/GPR13<br/>2/HAS1/HLA-DOA/HLA-<br/>DPA1/ANXA13/HRH1/HSP90AB1/HTR3A/CD300E/IGF1/IGF2/GPR142/LCE1C/LCE1D/LCE2D/IL1R1/IL1RN/IL10RA/AQP2/IL11RA/IL12RB2/PRSS41/IL16/AQP5/INPP5A/AQP9/ITGA7/I<br/>TGB2/ITGB7/ITIH4/IVL/JUP/CD82/KCNH2/KCNJ8/KCNJ9/KCNMB1/KDR/OR2A5/LCP1/MUC21/LDLR/LHCGR/RAB19/LPP/MC2R/MCC/ASGR1/MPZ/NUBP1/NEU1/ATP1A2/NRAS/OPR<br/>L1/OR2C1/OR3A2/SLC22A18/P2RY6/ATP5B/ANO7/PCYOX1/PDE6B/ATP8A2/PKH1/PKM/FXYD6/GPR84/SLCO1C1/TLR9/TREM1/SSH1/APBB11P/FBLIM1/CYP2W1/FANCI/SLC47A1/<br/>TRPV6/SLC30A10/CHRNA9/PARVA/PRKAR1B/TTC17/LMBRD1/PAG1/APOBR/MAPK3/MAP2K2/PCDHGB3/MRAP/TRPV5/PRMT8/CD42SE1/RGMA/PTGFR/PLEKHG5/TENM2/ERMN<br/>/PTPRE/TRIM27/RGR/RGS12/RIT2/PARVG/NOD2/STRA6/DNAI2/CLDN25/PCDH20/SLC4A1/SLC6A12/SLC8A1/SLC9A3/SLC20A2/BMPR1B/LYNX1/BPI/STAT2/BST2/TGM2/TNFRSF1A/<br/>TRAFF5/TRPC6/TRPM2/CCR2/TNFRSF4/ZAP70/CACNA1E/CARD14/IGFLR1/CALD1/PSCA/GPR157/ZC3H12A/C6orf25/CALR/ANTXR1/BFSP2/ATP13A4/YIPF4/CASQ1/PARD6G/SLC43A1<br/>/IFITM1/ITPRIP/SCIN/IRS2/ACTN1/TNFRSF11A/SPHK1/ENDOU/SKAP2/STBD1/TSPAN18/CCRL2/PRC1/SYT7/ESAM/SLC16A3/CD8A/TRIP10/ENTPD3/RAPGEF2/CD79A</p>                                                                                                                                                                                                                                                                                                                                                                                                                                                                                                                                                                                                                                                                                                                                                                                                                                                                                                                                                                                                                                                                                                                                                                                                                                                                                                                                                                                                                                                                                                                                                                                                                                                                                                                                                                                                                                                                                                                                                                                                                                                                                                                                                                                                                                                                                                                                                                                                                                                                                                                                                                                                                                               | 234 |

|            |                 |         |             |          |          |          |                                                                                                                                                                                                                                                                                                                                                                                                                                                                                                                                                                                                                                                                                                                                                                                                                                                                                                                                                                                                                                                                                                                                                                                                                                                                                                                                                                                                                                                                                                                                                                                                                                                                                                                                                                                                                                                                                                                                                                                                                                                                                                                                                                                                                                                                                                                                                                                                                                                                                                                                                                                                                                                                                                                                                                                                                                                                                                                                                                                                                                                                                                                                                                                                                                                                                                                                                                                                                                                                                                                                                                                                                                                                                                                                 |     |
|------------|-----------------|---------|-------------|----------|----------|----------|---------------------------------------------------------------------------------------------------------------------------------------------------------------------------------------------------------------------------------------------------------------------------------------------------------------------------------------------------------------------------------------------------------------------------------------------------------------------------------------------------------------------------------------------------------------------------------------------------------------------------------------------------------------------------------------------------------------------------------------------------------------------------------------------------------------------------------------------------------------------------------------------------------------------------------------------------------------------------------------------------------------------------------------------------------------------------------------------------------------------------------------------------------------------------------------------------------------------------------------------------------------------------------------------------------------------------------------------------------------------------------------------------------------------------------------------------------------------------------------------------------------------------------------------------------------------------------------------------------------------------------------------------------------------------------------------------------------------------------------------------------------------------------------------------------------------------------------------------------------------------------------------------------------------------------------------------------------------------------------------------------------------------------------------------------------------------------------------------------------------------------------------------------------------------------------------------------------------------------------------------------------------------------------------------------------------------------------------------------------------------------------------------------------------------------------------------------------------------------------------------------------------------------------------------------------------------------------------------------------------------------------------------------------------------------------------------------------------------------------------------------------------------------------------------------------------------------------------------------------------------------------------------------------------------------------------------------------------------------------------------------------------------------------------------------------------------------------------------------------------------------------------------------------------------------------------------------------------------------------------------------------------------------------------------------------------------------------------------------------------------------------------------------------------------------------------------------------------------------------------------------------------------------------------------------------------------------------------------------------------------------------------------------------------------------------------------------------------------------|-----|
| GO:0005886 | plasma membrane | 229/617 | 4464/17046  | 8.17E-10 | 1.60E-07 | 1.50E-07 | AKT3/ABI1/CD300LD/CDH9/CDH12/FARP1/KLRG1/TRDN/PDPN/GJB6/TMED10/ADAM29/ERLIN2/PKP3/CHRNA1/CHRNA2/GPRIN1/PANX3/FAT3/CCR1/SLC51B/SEZ6/CNP/IL31RA/OR2A14/CPM/MPP7/LDLRAD3/CSTA/XKR3/SH3D19/CYLD/DIO3/DLG2/DNA/EEF2/EFNA2/LIPH/SLC10A4/ENO2/EPA1/ESR1/F11/FAT2/SPATA13/FCGR2A/FGA/FGF10/NFASC/EPB41L3/FLOT2/MLC1/RHOBTB2/NEDD4L/SYNE1/PSD3/PPP1R13B/STEAP2/LCE2B/PLEK2/SLC17A5/ADGRF1/NPTN/CYTH4/GPR26/FFAR2/GRB10/GRIK4/GUCY1A3/GPR132/HAS1/HLA-DOA/HLA-DPA1/ANXA13/HRH1/HSP90A1/HTR3A/CD300E/IGF1/IGF2/GPR142/LCE1C/LCE1D/LCE2D/IL1R1/IL1RN/IL10RA/AQP2/IL11RA/IL12RB2/PRSS41/IL16/AQP5/INPP5A/AQP9/ITGA7/ITGB2/ITGB7/ITIH4/IVL/JUP/CD82/KCNH2/KCNJ8/KCNJ9/KCNMB1/KDR/OR2A5/LCP1/MUC21/LDLR/LHCGR/RAB19/LPP/MC2R/MCC/ASGR1/MPZ/NUBP1/NEU1/ATP1A2/NRAS/OPRL1/OR2C1/OR3A2/SLC22A18/P2RY6/ATP5B/ANO7/PCYOX1/PDE6B/ATP8A2/PKH1/PKM/FXYD6/GPR84/SLCO1C1/TLR9/TREM1/SSH1/APBB1P/CYP2W1/FANCI/SLC47A1/TRPV6/SLC30A10/CHRNA9/PARVA/PRKAR1B/TTC17/LMBRD1/PAG1/APOBR/MAPK3/MAP2K2/PCDHGB3/MRAP/TRPV5/PRMT8/CDC42SE1/RGMA/PTGFR/PLEKHG5/TENM2/PTPRE/TRIM27/RGR/RGS12/RIT2/PARVG/NOD2/STRA6/DNAI2/CLDN25/PCDH20/SLC4A1/SLC6A12/SLC8A1/SLC9A3/SLC20A2/BMPR1B/LYNX1/BPI/STAT2/BST2/TGM2/TNFRSF1A/TRAF5/TRPC6/TRPM2/CCR2/TNFRSF4/ZAP70/CACNA1E/CARD14/IGFLR1/CALD1/PSCA/GPR157/ZC3H12A/C6orf25/CALR/ANTXR1/BFSP2/ATP13A4/YIPF4/CASQ1/PARD6G/SLC43A1/IFITM1/ITPRIP/IRS2/ACTN1/TNFRSF11A/SPHK1/ENDOU/SKAP2/STBD1/TSPAN18/CCRL2/PRC1/SYT7/ESAM/SLC16A3/CD8A/TRIP10/ENTPD3/RAPGEF2/CD79A                                                                                                                                                                                                                                                                                                                                                                                                                                                                                                                                                                                                                                                                                                                                                                                                                                                                                                                                                                                                                                                                                                                                                                                                                                                                                                                                                                                                                                                                                                                                                                                                                                                                                                                                                                                                                                                                                                                                                                                                                                                                                                                                                                                                                                                              | 229 |
| GO:0005623 | cell            | 570/617 | 14587/17046 | 9.05E-08 | 1.33E-05 | 1.25E-05 | AKT3/ABI1/TANK/CD300LD/GNE/ZNF783/CDH9/CDH12/SUGP2/FARP1/KLRG1/RCAN2/CDKN1C/SPEG/MRV1/TRDN/COG5/PITRM1/TACC2/MTHFS/PDPN/CELFI1/GJB6/PNRC1/TME D10/LECT1/RER1/ADAM29/HNRNPUL1/RPP14/CHGA/CHI3L1/ERLIN2/PKP3/EGLN2/ATXN2L/KIF12/ACOT7/EXOC3/CHRNA1/CHRNA2/GPRIN1/GBP4/PANX3/RBP7/GALNT15/AP3S1/C10orf90/FAT3/CLN5/MRPL52/CCR1/SLC51B/SPATA33/SEZ6/TNFAIP8L1/MOB3A/CNP/NEU4/COL9A3/MAP3K8/ADM/IL31RA/UBLCP1/HUS1B/OR2A14/CPM/CPS1/NDUFAF6/PXD NL/CRABP1/ZNF358/MIB2/PARP4/MPP7/LDLRAD3/FAM101A/B3GLCT/CEP128/MGAT5B/CSTA/KLC3/ZNF738/XKR3/SMYD1/SGOL1/PPM11/SH3D19/CYLD/MBOAT1/ESCO2/CYP11A1/ZNF782/CALML6/DOB1/DDOST/ZNF366/BHLHA15/PPP1R18/DIO3/DLG2/DMBT1/DNAH6/ABAT/DPH1/DNA/AGXT/EEF2/EFNA2/EIF4G1/A2M/ELK4/ANKRD23/LIPH/SLC10A4/S MIM14/ENO2/ADCK5/EPA1/ESR1/F11/FAH/FAT2/SPATA13/PRSS54/FCGR2A/PACTR1/FGA/FGF10/FHIT/BTBD3/TRAK1/MSRB2/FOXO1/FOXO2/EXPH5/AKR1B1/NFASC/EPB41L3/GGA3/DIP2A/FLOT2/MLC1/TBC1D1/RHOBTB2/NUP210/NEDD4L/SYNE1/PSD3/PPP1R13B/PUM2/ARHGEF18/RYPB/MORC3/MAPK8IP2/TSSK2/VGLL2/SLC37A4/RASGEF1C/RNF144B/ZNF549/CCDC110/ST6GALNAC3/SAMM50/DFNB31/ALS2CL/PNKD/SEC31B/ACOT11/RAI14/STEAP2/GAS2/FBXL21/LCE2B/SACS/GATM/GBGT1/PLEK2/SLC17A5/ADGRF1/RPS6KC1/PABPC1/AKAP8L/DNAJC2/FGF22/NPTN/PDE7B/CYTH4/AMPD3/DHHDH/BMP10/ZNF638/ZNF311/ZNF844/THEM5/GPR26/EOGT/FFAR2/TRIM42/GRB10/MRPS18B/GRIK4/DNAJC15/SCG3/TMOD4/GUCY1A3/GPR132/PADI1/HAS1/SOX8/HK1/HLA-DOA/HLA-DPA1/ANXA13/NR4A1/ACACB/HOXC4/HRH1/HSD11B1/HSPA1L/HSP90A1/HTR3A/DUPD1/TFAP2E/ID3/ZC3H12D/RSP02/CD300E/NME9/IGF1/IGF2/GPR142/LCE1C/LCE1D/LCE2D/IL1R1/IL1RN/IL10RA/AQP2/IL11RA/IL12RB2/IL15RA/PRSS41/IL16/FOXK2/AQP5/INHBA/INPP5A/IRF1/AQP9/ITGA7/ITGB2/ITGB7/ITIH4/IVL/JUP/CD82/USP50/KCNH2/KCNJ8/KCNJ9/KCNMB1/KDR/KIF25/IPO5/CLEC17A/HES5/AFF3/STMN1/OR2A5/LCP1/MUC21/LDLR/ARHGDI4/LGALS9/LHCGR/LMNA/LMO2/RAB19/LPP/MC2R/MCC/ME2/MFNG/MGAT1/MITF/LHX8/ASGR1/MOCS1/MOV10/MPZ/MYH4/MYL2/NUBP1/NDUFB4/DRG1/NEU1/ATP1A2/NFATC3/NHLH2/NPPC/NRAS/OAS2/OPRL1/OR2C1/OR3A2/SLC22A18/P2RY6/PFAH2/ATP5B/ANO7/PARK2/BOLA1/UTP11L/CHST15/PCYOX1/C11orf73/SIRT6/PDE6B/ATP8A2/PITX2/PKH1/PKM/PLA2G2A/PLAGL1/PRKAG3/PML/RIPPLY3/FXYD6/GPR84/SLCO1C1/TLR9/TREM1/SSH1/RIN2/POU2AF1/APBB1P/MXR8/FBLIM1/MED18/PALMD/CYP2W1/RPP25/BANP/PPP1CB/HERC6/ELP3/DNAJC17/GOLPH3L/PPP2R2B/FANCI/MOB1A/SLC47A1/SLC29A3/MIS18BP1/TRPV6/SLC30A10/CHRNA9/PEX26/FRMD4A/CARKD/PARVA/PRKAR1B/TTC17/IFT122/CFAP44/ERMARD/MCTP2/LMBRD1/CSGALNACT1/PAG1/CISD1/WSB2/MYNN/APOBR/MAPK3/MAP2K2/PCDHGB3/PRKRIR/PROC/MRAP/TRPV5/PRMT8/HTRA1/SLAMF8/CDC42SE1/PAK6/ARNTL2/RGMA/PRDM11/PSMD7/PTGFR/PLEKHG5/TENM2/GATAD2B/ERMN/KLHL8/RDH14/MARK4/PTPRE/CREBZF/FAM60A/ACTA2/RFC2/TRIM27/RGR/RGS12/RIT2/RPA3/BGLAP/CCL11/ABHD4/MRPS14/NPAS3/PARVG/NOD2/STRA6/MAP1LC3B2/ARHGAP9/GZF1/DNAI2/CLDN25/PCDH20/TMEM237/VPS33A/BMP4/SLC4A1/SPATS2/ZNF649/ZG16/SLC6A12/SLC8A1/SLC9A3/SLC20A2/BMPR1B/SUT1/ZSCAN18/LYNX1/BOK/BPI/SR P68/STAT2/STK3/SUPT6H/BST2/TCEB2/ZEB1/TEAD3/TERF1/TGM2/TCHH/TNFAIP3/TNFRSF1A/TRAF5/TRPC6/TRPM2/CCR2/TNFRSF4/UCP1/ZAP70/ZNF7/CA7/CACNA1E/MOGS/RA B7A/ERI3/CCDC86/CARD14/ESRG/BCL2L14/LST1/CERS4/IGFLR1/ZNF665/CSPP1/ERMP1/CALD1/PSCA/FAM188A/GPR157/ZC3H12A/FAAP100/CPEB4/C6orf25/ZNF436/CALR/COL21A1/KRTAP2-1/QTRT1/SLIRP/CAST/CAPZB/CCDC3/DYNLRB2/SLC25A18/SPATA16/KRTAP17-1/ANTXR1/CMAHP/BFSP2/ATP13A4/YIPF4/ZNF397/NR0B2/MON1A/CASQ1/HOPX/PARD6G/TTBK1/TRIM63/GTPBP3/RAE1/C1orf198/PPFIBP2/SLC43A1/IFITM1/ITPRIP/SCIN/KMO/RUNX1/TP63/RUNX3/IRS2/ACTN1/CRADD/TNFRSF11A/ALDH1A2/STK19/SYJ2/SPHK1/BUZD1/CCNA1/ENDOU/SKAP2/STBD1/HSPB3/TSPAN18/CH25H/CCRL2/ERI1/PRC1/STARD13/PIAS2/MAP3K6/SYT7/ESAM/SLC16A3/CBFA2T2/RSAD2/AURKB/CD8A/CCDC102A/TRIP10/ADIPOQ/ENTPD3/PREPL/RAB36/MICAL2/N4BP1/VGLL4/NUP93/RAPGEF2/CD79A/KIAA0513/DAZAP2/ZBTB39/IQSEC1/LPGAT1/FGF19/NR1H4 | 570 |

|            |           |         |             |          |          |          |                                                                                                                                                                                                                                                                                                                                                                                                                                                                                                                                                                                                                                                                                                                                                                                                                                                                                                                                                                                                                                                                                                                                                                                                                                                                                                                                                                                                                                                                                                                                                                                                                                                                                                                                                                                                                                                                                                                                                                                                                                                                                                                                                                                                                                                                                                                                                                                                                                                                                                                                                                                                                                                                                                                                                                                                                                                                                                                                                                                                                                                                                                                                                                                                                                                                                                                                                                                                                                                                                                                                                                                                                                                                                                                                                  |     |
|------------|-----------|---------|-------------|----------|----------|----------|--------------------------------------------------------------------------------------------------------------------------------------------------------------------------------------------------------------------------------------------------------------------------------------------------------------------------------------------------------------------------------------------------------------------------------------------------------------------------------------------------------------------------------------------------------------------------------------------------------------------------------------------------------------------------------------------------------------------------------------------------------------------------------------------------------------------------------------------------------------------------------------------------------------------------------------------------------------------------------------------------------------------------------------------------------------------------------------------------------------------------------------------------------------------------------------------------------------------------------------------------------------------------------------------------------------------------------------------------------------------------------------------------------------------------------------------------------------------------------------------------------------------------------------------------------------------------------------------------------------------------------------------------------------------------------------------------------------------------------------------------------------------------------------------------------------------------------------------------------------------------------------------------------------------------------------------------------------------------------------------------------------------------------------------------------------------------------------------------------------------------------------------------------------------------------------------------------------------------------------------------------------------------------------------------------------------------------------------------------------------------------------------------------------------------------------------------------------------------------------------------------------------------------------------------------------------------------------------------------------------------------------------------------------------------------------------------------------------------------------------------------------------------------------------------------------------------------------------------------------------------------------------------------------------------------------------------------------------------------------------------------------------------------------------------------------------------------------------------------------------------------------------------------------------------------------------------------------------------------------------------------------------------------------------------------------------------------------------------------------------------------------------------------------------------------------------------------------------------------------------------------------------------------------------------------------------------------------------------------------------------------------------------------------------------------------------------------------------------------------------------|-----|
| GO:0044464 | cell part | 567/617 | 14556/17046 | 4.17E-07 | 4.91E-05 | 4.60E-05 | <p>AKT3/ABI1/TANK/CD300LD/GNE/ZNF783/CDH9/CDH12/SUGP2/FARP1/KLRG1/RCAN2/CDKN1C/SPEG/MRVI1/TRDN/COG5/PITRM1/TACC2/MTHFS/PDPN/CELF1/GJB6/PNRC1/TME D10/LECT1/RER1/ADAM29/HNRNPUL1/RPP14/CHGA/CHI31/ERLIN2/PKP3/EGLN2/ATXN2L/KIF12/ACOT7/EXOC3/CHRNA1/CHRNA2/GPRIN1/GBP4/PANX3/RBP7/GALNT15/AP3S1 /C10orf90/FAT3/CLN5/MRPL52/CCR1/SLC51B/SPATA33/SEZ6/TNFAIP8L1/MOB3A/CNP/NEU4/COL9A3/MAP3K8/ADM/IL131RA/UBLCP1/HUS1B/OR2A14/CPM/CP51/NDUFAF6/PXD NL/CRABP1/ZNF358/MB2/PARP4/MPP7/LDLRAD3/FAM101A/B3GLCT/CEP128/MGAT5B/CSTA/KLC3/ZNF738/XKR3/SMYD1/SGOL1/PPM1L/SH3D19/CYLD/MBOT1/ESCO2/CYP11 A1/ZNF782/CALML6/DBB1/DDOST/ZNF366/BHLHA15/PPP1R18/DIO3/DLG2/DMBT1/DNAH6/ABAT/DPH1/DTNA/AGXT/EEF2/EFNA2/EIF4G1/A2M/ELK4/ANKRD23/LIPH/SLC10A4/S MIM14/ENO2/ADCK5/EPHA1/ESR1/F11/FAH/FAT2/SPATA13/PRSS54/FCGR2A/FGA/FGF10/FHIT/BTBD3/TRAK1/MSRB2/FOXO1/FOXO2/EXPH5/ANKR1B1/NFASC/EPB41L3/ GGA3/DIP2A/FLOT2/MLC1/TBC1D1/RHOBTB2/NUP210/NEDD4L/SYNE1/PSD3/PPP1R13B/PUM2/ARHGFB18/RYPB/MORC3/MAPK8IP2/TSSK2/VGLL2/SLC37A4/RASGEF1C/RNF144B /ZNF549/CCDC110/ST6GALNAC3/SAMM50/DFNB31/ALS2CL/PNKD/SEC31B/ACOT11/RAI14/STEAP2/GAS2/FBXL21/LCE2B/SACS/GATM/GBGT1/PLEK2/SLC17A5/ADGRF1/RPS6K1/ PABPC1/AKAP8L/DNAJC2/FGF22/NPTN/PDE7B/CYTH4/AMPD3/DHDH/BMP10/ZNF638/ZNF311/ZNF844/THEM5/GPR26/EOGT/FFAR2/TRIM42/GRB10/MRPS18B/GRIK4/DNAJC15/ SCG3/TMOD4/GUCY1A3/GPR132/PADI1/HAS1/SOX8/HK1/HLA-DOA/HLA-</p> <p>DPA1/ANXA13/NR4A1/ACACB/HOXC4/HRH1/HSD11B1/HSPA1L/HSP90AB1/HTR3A/DUPD1/TFAP2E/ID3/ZC3H12D/RSPO2/CD300E/NME9/IGF1/IGF2/GPR142/LCE1C/LCE1D/LCE2D /L1R1/L1RN/IL10RA/AQP2/IL11RA/IL12RB2/IL15RA/PRSS41/IL16/FOXX2/AQP5/INPP5A/IRF1/AQP9/ITGA7/ITGB2/ITGB7/ITIH4/IVL/JUP/CD82/USP50/KCNH2/KCNJ8/KCNJ9/KCNM B1/KDR/KIF25/IPO5/CLEC17A/HES5/AFF3/STMN1/OR2A5/LCP1/MUC21/LDLR/ARHGDI2/LGALS9/LHCGR/LMNA/LMO2/RAB19/LPP/MC2R/MCC/ME2/MFNG/MGAT1/MITF/LHX8/A SGR1/MOC51/MOV10/MP2/MYH4/MYL2/NUBP1/NDUFB4/DRG1/NEU1/ATP1A2/NFATC3/NHLH2/NPPC/NRAS/OAS2/OPRL1/OR2C1/OR3A2/SLC22A18/P2RY6/PAFAH2/ATP5B/AN O7/PARK2/BOLA1/UTP11L/CHST15/PCYOX1/C11orf73/SIRT6/PDE6B/ATP8A2/PITX2/PKHD1/PKM/PLA2G2A/PLAGL1/PRKAG3/PML/RIPPLY3/FXYD6/GPR84/SLCO1C1/TLR9/TREM1/ SSH1/RIN2/POU2AF1/APBB1P/MXR8/FBLIM1/MED18/PALMD/CYP2W1/RPP25/BANP/PPP1CB/HERC6/ELP3/DNAJC17/GOLPH3L/PPP2R2B/FANCI/MOB1A/SLC47A1/SLC29A3/MI S18BP1/TRPV6/SLC30A10/CHRNA9/PEX26/FRMD4A/CARKD/PARVA/PRKAR1B/TTC17/IFT122/CFAP44/ERMARD/MCTP2/LMBRD1/CSGALNACT1/PAG1/CISD1/WSB2/MYNN/APOBR /MAPK3/MAP2K2/PCDHGB3/PRKRIR/PROC/MRAP/TRPV5/PRMT8/HTRA1/SLAMF8/CDC42SE1/PAK6/ARNTL2/RGMA/PRDM11/PSMD7/PTGFR/PLEKHG5/TENM2/GATAD2B/ERMN/ KLHL8/RDH14/MARK4/PTPRE/CREBZF/FAM60A/ACTA2/RFC2/TRIM27/RGR/RGS12/RIT2/RPA3/BGLAP/CCL11/ABHD4/MRPS14/NPAS3/PARVG/NOD2/STRA6/MAP1LC3B2/ARHGAP 9/GZF1/DNAI2/CLDN25/PCDH20/TMEM237/VPS33A/BMP4/SLC4A1/SPATS2/ZNF649/ZG16/SLC6A12/SLC8A1/SLC9A3/SLC20A2/BMPR1B/ZSCAN18/LYNX1/BOK/BPI/STAT2/BST2/T STK3/SUPT6H/BST2/TCB2/ZEB1/TEAD3/TERF1/TGM2/TCHH/TNFAIP3/TNFRSF1A/TRAFF5/TRPC6/TRPM2/CCR2/TNFRSF4/UCP1/ZAP70/ZNF7/CA7/CACNA1E/MOGS/RAB7A/ER13/C CDC86/CARD14/ESRG/BCL2L14/LST1/CERS4/IGFLR1/ZNF665/CSPP1/ERMP1/CALD1/PSCA/FAM188A/GPR157/ZC3H12A/FAAP100/CEB4/C6orf25/ZNF436/CALR/COL21A1/KRTAP2- 1/QTRT1/SLIRP/CAST/CAP2B/CCDC3/DYNLRB2/SLC25A18/SPATA16/KRTAP17-</p> <p>1/ANTXR1/CMAHP/BFSP2/ATP13A4/YIPF4/ZNF397/NROB2/CASQ1/HOPX/PARD6G/TTBK1/TRIM63/GTPBP3/RAE1/C1orf198/PPFIBP2/SLC43A1/IFITM1/ITPRIP/SCIN/KMO/RUNX1/T P63/RUNX3/IRS2/ACTN1/CRADD/TNFRSF11A/ALDH1A2/STK19/SYNJ2/SPHK1/BUD31/CCNA1/ENDOU/SKAP2/STBD1/HSPB3/TSPAN18/CH25H/CCRL2/ER1/PRC1/STARD13/PIAS2/ MAP3K6/SYT7/ESAM/SLC16A3/CBFA2T2/RSAD2/AURKB/CD8A/CCDC102A/TRIP10/ADIPOQ/ENTPD3/PREPL/RAB36/MICAL2/N4BP1/VGLL4/NUP93/RAPGEF2/CD79A/KIAA0513/DA ZAP2/ZBTB39/IQSEC1/LPGAT1/FGF19/NR1H4</p> | 567 |
| GO:0016020 | membrane  | 351/617 | 8177/17046  | 3.80E-06 | 0.00037  | 0.00035  | <p>AKT3/ABI1/SMIM6/CD300LD/CDH9/CDH12/FARP1/KLRG1/MRVI1/TRDN/COG5/PDPN/CELF1/GJB6/TMED10/LECT1/RER1/ADAM29/CHGA/ERLIN2/PKP3/ATXN2L/EXOC3/CHRNA1/ CHRNA2/GPRIN1/SORCS1/PANX3/GALNT15/AP3S1/FAT3/CLN5/MRPL52/CCR1/SLC51B/SEZ6/CNP/NEU4/IL131RA/OR2A14/CPM/CP51/NDUFAF6/PARP4/MPP7/LDLRAD3/B3GLCT/ MGAT5B/CSTA/ABCC13/XKR3/PPM1L/SH3D19/CYLD/MBOT1/ANKRD46/CYP11A1/DDOST/DIO3/DLG2/DMBT1/DTNA/EEF2/EFNA2/EIF4G1/LIPH/SLC10A4/SMIM14/ENO2/ADCK5/ EPHA1/ESR1/F11/FAT2/SPATA13/FCGR2A/FGA/FGF10/NFASC/EPB41L3/GGA3/FLOT2/MLC1/RHOBTB2/NUP210/NEDD4L/SYNE1/PSD3/PPP1R13B/PUM2/SLC37A4/RNF144B/ST6G ALNAC3/TMEM151A/SAMM50/PNKD/SEC31B/STEAP2/GAS2/LCE2B/GATM/GBGT1/PLEK2/SLC17A5/ADGRF1/RPS6K1/PABPC1/DNAJC2/NPTN/CYTH4/TMPRSS12/GPR26/FFAR2/G RB10/MRPS18B/GRIK4/DNAJC15/SCG3/GUCY1A3/GPR132/HAS1/HK1/HLA-DOA/HLA-</p> <p>DPA1/ANXA13/NR4A1/ACACB/AGFG2/HRH1/HSD11B1/HSP90AB1/HTR3A/CD300E/IGF1/IGF2/GPR142/LCE1C/LCE1D/LCE2D/IL1R1/IL1RN/IL10RA/AQP2/IL11RA/IL12RB2/IL15RA/P RSS41/IL16/AQP5/INPP5A/AQP9/ITGA7/ITGB2/ITGB7/ITIH4/IVL/JUP/CD82/KCNH2/KCNJ8/KCNJ9/KCNMB1/KDR/IPO5/AMIGO3/CLEC17A/STMN1/OR2A5/LCP1/MUC21/LDLR/LHC GR/C11orf87/LMNA/RAB19/LPP/MC2R/MCC/MFNG/MGAT1/ASGR1/MP2/NUBP1/NDUFB4/DRG1/NEU1/ATP1A2/NRAS/OAS2/OPRL1/OR2C1/OR3A2/SLC22A18/P2RY6/ATP5B/IL2 1R/ANO7/CHST15/PCYOX1/PDE6B/HIGD1B/ATP8A2/PKHD1/PKM/PLA2G2A/LRP1B/PML/FXYD6/GPR84/SLCO1C1/TLR9/TREM1/SSH1/APBB1P/MXR8/PALMD/CYP2W1/GOLPH3L /PPP2R2B/FANCI/SLC47A1/SLC29A3/TRPV6/SLC30A10/CHRNA9/PEX26/PARVA/PRKAR1B/TTC17/IFT122/ERMARD/MCTP2/LMBRD1/CSGALNACT1/PAG1/CISD1/APOBR/MAPK3/M AP2K2/PCDHGB3/MRAP/TRPV5/PRMT8/SLAMF8/CDC42SE1/RGMA/CEACAM19/PSMD7/PTGFR/PLEKHG5/TENM2/RNF150/RDH14/PTPRE/TRIM27/RGR/RGS12/RIT2/MRPS14/PAR VG/NOD2/STRA6/MAP1LC3B2/DNAI2/CLDN25/PCDH20/TMEM237/VPS33A/SLC4A1/ZG16/SLC6A12/SLC8A1/SLC9A3/SLC20A2/BMPR1B/TMEM108/LYNX1/BOK/BPI/STAT2/BST2/T GM2/TNFRSF1A/TRAFF5/TRPC6/TRPM2/CCR2/TNFRSF4/UCP1/ZAP70/CACNA1E/MOGS/RAB7A/CARD14/BCL2L14/LST1/CERS4/IGFLR1/ERMP1/CALD1/PSCA/FAM188A/TMEM62/G PR157/ZC3H12A/C6orf25/CLPTM1L/CALR/CAST/SLC25A18/ANTXR1/MFSD7/CMAHP/BFSP2/ATP13A4/YIPF4/CASQ1/PARD6G/FAXC/RAE1/SLC43A1/IFITM1/ITPRIP/KMO/IRS2/ACT N1/TNFRSF11A/SYNJ2/SPHK1/ENDOU/SKAP2/STBD1/SLAMF9/TSPAN18/CH25H/CCRL2/PRC1/STARD13/SYT7/ESAM/SLC16A3/RSAD2/CD8A/TRIP10/ENTPD3/RAB36/NUP93/RAPGE F2/CD79A/IQSEC1/LPGAT1</p>                                                                                                                                                                                                                                                                                                                                                                                                                                                                                                                                                                                                                                                                                                                                                                                                                                                                                                                                                                                                                                                                                                                                                                                                                                                                                                                                                                                                              | 351 |



|                                               |                      |           |            |         |          |         |                                                                                                                                                                                                                                                                                                                                                                                                                                                                                                                                                                                                                                                                                                                                                                                                                                                                                                                                                                                                                                                                                                                                                                                                                                                                                                                                                                                                                                                                                                                                                                                                                                                                                                                                                                                                                                                                                                                                                                                                                                                                                                                                                                                                                                                                                                                                                                                                                                                                                                                                                        |       |
|-----------------------------------------------|----------------------|-----------|------------|---------|----------|---------|--------------------------------------------------------------------------------------------------------------------------------------------------------------------------------------------------------------------------------------------------------------------------------------------------------------------------------------------------------------------------------------------------------------------------------------------------------------------------------------------------------------------------------------------------------------------------------------------------------------------------------------------------------------------------------------------------------------------------------------------------------------------------------------------------------------------------------------------------------------------------------------------------------------------------------------------------------------------------------------------------------------------------------------------------------------------------------------------------------------------------------------------------------------------------------------------------------------------------------------------------------------------------------------------------------------------------------------------------------------------------------------------------------------------------------------------------------------------------------------------------------------------------------------------------------------------------------------------------------------------------------------------------------------------------------------------------------------------------------------------------------------------------------------------------------------------------------------------------------------------------------------------------------------------------------------------------------------------------------------------------------------------------------------------------------------------------------------------------------------------------------------------------------------------------------------------------------------------------------------------------------------------------------------------------------------------------------------------------------------------------------------------------------------------------------------------------------------------------------------------------------------------------------------------------------|-------|
| GO:0005737                                    | cytoplasm            | 396/617   | 9735/17046 | 0.00016 | 0.01333  | 0.01249 | AKT3/ABI1/TANK/GNE/FARP1/RCAN2/CDKN1C/MRV1/TRDN/COG5/PITRM1/TACC2/MTHFS/CELF1/GJB6/TMED10/RER1/CHGA/CHI3L1/ERLIN2/EGLN2/ATXN2L/KIF12/ACOT7/EXO3/GBP4/RBP7/GALNT15/AP3S1/C10orf90/CLN5/MRPL52/CCR1/SPATA33/SEZ6/TNFaip8L1/CNP/NEU4/COL9A3/MAP3K8/ADM/CPS1/NDUFAF6/PXDNL/CRABP1/MIB2/PARP4/MP7/FAM101A/B3GLCT/CEP128/MGAT5B/CSTA/KLC3/SMYD1/SGOL1/PPM1L/SH3D19/CYLD/MBOAT1/ESCO2/CYP11A1/CALML6/DBB1/DDOST/PPP1R18/DIO3/DMBT1/DNAH6/ABAT/DPH1/DTNA/AGXT/EEF2/EIF4G1/A2M/ELK4/ANKRD23/SMIM14/ENO2/ADCK5/ESR1/FAH/SPATA13/PRSS54/PHACTR1/FGA/FHIT/BTBD3/TRAK1/MSRB2/EXPH5/AKR1B1/EPB41L3/GGA3/FLOT2/MCL1/TBC1D1/RHOBTB2/NUP210/NEDD4L/SYNE1/PPP1R13B/PUM2/ARHGEF18/RYPB/MAPK8IP2/TSSK2/VGLL2/SLC37A4/RNF144B/CCDC110/ST6GALNAC3/SAMM50/DFNB31/ALS2CL/PNKD/SEC31B/ACOT11/RAI14/STEAP2/GAS2/FBXL21/LCE2B/SACS/GATM/GBGT1/PLEK2/SLC17A5/RPS6KC1/PABPC1/AKAP8L/DNAJC2/FGF22/NPTN/PDE7B/AMPD3/DHHDH/BMP10/ZNF638/THEM5/EOGT/GRB10/MRPS18B/DNAJC15/SCG3/TMOD4/GUCY1A3/PADI1/HAS1/SOX8/HK1/HLA-DOA/HLA-DPA1/ANXA13/NR4A1/ACACB/HRH1/HSD11B1/HSPA1L/HSP90AB1/HTR3A/DUPD1/ID3/ZC3H12D/NME9/IGF1/IGF2/GPR142/LCE1C/LCE1D/LCE2D/IL1RN/AQP2/IL15RA/IL16/AQP5/IRF1/ITGA7/ITIH4/IVL/JUP/KCNH2/KCNJ8/KDR/KIF25/IPO5/AFF3/STMN1/LCP1/MUC21/LDLR/ARHGDI/ALGALS9/LHCGR/LMNA/RAB19/LPP/MC2R/MCC/ME2/MFNG/MGAT1/MITF/MOCS1/MOV10/MPZ/MYH4/MYL2/NUBP1/NDUFB4/DRG1/NEU1/ATP1A2/NFATC3/NPPC/NRAS/OAS2/OPRL1/OR2C1/SLC22A18/PAFAH2/ATP5B/ANO7/PARK2/BOLA1/UTP11L/CHST15/PCYOX1/C11orf73/SIRT6/PDE6B/ATP8A2/PITX2/PKHD1/PKM/PLA2G2A/PLAGL1/PRKAG3/PML/TLR9/SSH1/RIN2/APBB1IP/FBLIM1/PALMD/CYP2W1/PPP1CB/HERC6/ELP3/DNAJC17/GOLPH3L/PPP2R2B/FANCI/MOB1A/SLC29A3/CHRNA9/PEX26/FRMD4A/CARKD/PARVA/PRKAR1B/TTC17/IFT122/ERMARD/LMBRD1/CSGALNACT1/CISD1/MAPK3/MAP2K2/PROC/MRAP/PRMT8/HTRA1/CDC42SE1/PAK6/ARNTL2/RGMA/PRDM11/PSMD7/PTGFR/PLEKHG5/TENM2/ERMN/RDH14/MARK4/PTPRE/ACTA2/RFC2/TRIM27/RGS12/BGLAP/MRPS14/NPAS3/PARVG/NOD2/MAP1LC3B2/ARHGAP9/GZF1/DNAI2/VPS33A/BMP4/SLC4A1/SPATS2/ZG16/SLC8A1/BOK/BPI/SRP68/STAT2/STK3/BST2/TCEB2/ZEB1/TERF1/TGM2/TNFAIP3/TNFRSF1A/TRAFF5/TRPC6/CCR2/UCP1/ZAP70/CA7/MOGS/RAB7A/ERI3/CARD14/BCL2L14/LST1/CERS4/CSPP1/ERMP1/CALD1/ZC3H12A/FAAP100/CPBE4/C6orf25/ZNF436/CALR/COL21A1/QTRT1/SLIRP/CAST/CAPZB/CCDC3/DYNLRB2/SLC25A18/SPATA16/ANTXR1/CMAMP/BFSP2/ATP13A4/YIPF4/ZNF397/NROB2/CASQ1/PARD6G/TTBK1/TRIM63/GTPBP3/RAE1/C1orf198/SCIN/KMO/RUNX1/TP63/RUNX3/IRS2/ACTN1/CRADD/ALDH1A2/SYNJ2/SPHK1/CCNA1/ENDOU/SKAP2/STBD1/HSPB3/CH25H/ERI1/PRC1/STARD13/MAP3K6/SYT7/RSAD2/AURKB/TRIP10/ADIPOQ/PREPL/RAB36/RAPGEF2/CD79A/KIAA0513/DAZAP2/LPGAT1 | 396   |
| GO:0005615                                    | extracellular space  | 67/617    | 1213/17046 | 0.00034 | 0.02516  | 0.02356 | SPON2/CHI3L1/CHI3L2/C1QTNF7/SEZ6/CNP/COMP/ADM/PXDNL/CSTA/DBB1/DMBT1/A2M/LIPH/ENO2/F11/FGA/FGF10/AKR1B1/FGF22/BMP10/ANXA13/HSPA1L/RSP02/IGF1/IGF2/IL1R1/IL1RN/IL15RA/IL16/INHBA/ITIH4/LCP1/LDLR/LGALS9/MFNG/SCGB2A1/MOV10/IGFL4/NPPC/SPOCK3/UTP11L/PCYOX1/PLA2G2A/PRKAG3/APOBR/PROC/HTRA1/SLURP1/ACTA2/BGLAP/SCT/CCL11/TINAGL1/BMP4/SLC4A1/ZNF649/SLIT1/BPI/TNFRSF1A/WNT10B/CALR/PPFIBP2/SERPINA6/ACTN1/ENDOU/ADIPOQ                                                                                                                                                                                                                                                                                                                                                                                                                                                                                                                                                                                                                                                                                                                                                                                                                                                                                                                                                                                                                                                                                                                                                                                                                                                                                                                                                                                                                                                                                                                                                                                                                                                                                                                                                                                                                                                                                                                                                                                                                                                                                                                                    | 67    |
| GO:0044459                                    | plasma membrane part | 115/617   | 2392/17046 | 0.00073 | 0.04762  | 0.0446  | ABI1/FARP1/TRDN/PDPN/GJB6/TMED10/ADAM29/CHRNA1/CHRNA2/CCR1/MPP7/CYLD/DLG2/DTNA/SLC10A4/EPHA1/SPATA13/FGA/EPB41L3/FLOT2/MCL1/SYNE1/PSD3/STEAP2/PLEK2/SLC17A5/NPTN/GPR26/FFAR2/GRIK4/GPR132/HAS1/HLA-DOA/HLA-DPA1/ANXA13/HRH1/HSP90AB1/HTR3A/GPR142/IL1R1/AQP2/IL11RA/IL12RB2/AQP5/AQP9/ITGA7/ITGB2/ITGB7/JUP/CD82/KCNH2/KCNJ8/KCNJ9/KCNMB1/KDR/LCP1/LDLR/LHCGR/MC2R/ASGR1/MPZ/ATP1A2/OPRL1/OR3A2/SLC22A18/P2RY6/PDE6B/PKHD1/FXYD6/GPR84/SLCO1C1/TLR9/APBB1IP/TRPV6/CHRNA9/MAPK3/MAP2K2/TRPV5/PTGFR/TENM2/TRIM27/RGR/NOD2/DNAI2/SLC4A1/SLC6A12/SLC8A1/SLC9A3/SLC20A2/BMPR1B/BPI/BST2/TGM2/TNFRSF1A/TRAFF5/TRPC6/TRPM2/CCR2/TNFRSF4/ZAP70/CACNA1E/CALR/ANTXR1/ATP13A4/CASQ1/SLC43A1/TNFRSF11A/STBD1/TSPAN18/CCRL2/SLC16A3/CD8A/TRIP10/RAPGEF2/CD79A                                                                                                                                                                                                                                                                                                                                                                                                                                                                                                                                                                                                                                                                                                                                                                                                                                                                                                                                                                                                                                                                                                                                                                                                                                                                                                                                                                                                                                                                                                                                                                                                                                                                                                                                                                                                       | 115   |
|                                               |                      |           |            |         |          |         |                                                                                                                                                                                                                                                                                                                                                                                                                                                                                                                                                                                                                                                                                                                                                                                                                                                                                                                                                                                                                                                                                                                                                                                                                                                                                                                                                                                                                                                                                                                                                                                                                                                                                                                                                                                                                                                                                                                                                                                                                                                                                                                                                                                                                                                                                                                                                                                                                                                                                                                                                        |       |
| <b>Hypomethylated DMC, Molecular Function</b> |                      |           |            |         |          |         |                                                                                                                                                                                                                                                                                                                                                                                                                                                                                                                                                                                                                                                                                                                                                                                                                                                                                                                                                                                                                                                                                                                                                                                                                                                                                                                                                                                                                                                                                                                                                                                                                                                                                                                                                                                                                                                                                                                                                                                                                                                                                                                                                                                                                                                                                                                                                                                                                                                                                                                                                        |       |
|                                               | Description          | GeneRatio | BgRatio    | pvalue  | p.adjust | qvalue  | geneID                                                                                                                                                                                                                                                                                                                                                                                                                                                                                                                                                                                                                                                                                                                                                                                                                                                                                                                                                                                                                                                                                                                                                                                                                                                                                                                                                                                                                                                                                                                                                                                                                                                                                                                                                                                                                                                                                                                                                                                                                                                                                                                                                                                                                                                                                                                                                                                                                                                                                                                                                 | Count |

|            |                    |         |             |          |          |          |                                                                                                                                                                                                                                                                                                                                                                                                                                                                                                                                                                                                                                                                                                                                                                                                                                                                                                                                                                                                                                                                                                                                                                                                                                                                                                                                                                                                                                                                                                                                                                                                                                                                                                                                                                                                                                                                                                                                                                                                                                                                                                                                                                                                                                                                                                                                                                                                                                                                                                                                                                                                                                                                                                                                                                                                                                                                                                                                                                                                                                                                                                                                                                                                                                                                                                                                                                                                                                                                                                                                                                                                                                                                                                                                                                                           |     |
|------------|--------------------|---------|-------------|----------|----------|----------|-------------------------------------------------------------------------------------------------------------------------------------------------------------------------------------------------------------------------------------------------------------------------------------------------------------------------------------------------------------------------------------------------------------------------------------------------------------------------------------------------------------------------------------------------------------------------------------------------------------------------------------------------------------------------------------------------------------------------------------------------------------------------------------------------------------------------------------------------------------------------------------------------------------------------------------------------------------------------------------------------------------------------------------------------------------------------------------------------------------------------------------------------------------------------------------------------------------------------------------------------------------------------------------------------------------------------------------------------------------------------------------------------------------------------------------------------------------------------------------------------------------------------------------------------------------------------------------------------------------------------------------------------------------------------------------------------------------------------------------------------------------------------------------------------------------------------------------------------------------------------------------------------------------------------------------------------------------------------------------------------------------------------------------------------------------------------------------------------------------------------------------------------------------------------------------------------------------------------------------------------------------------------------------------------------------------------------------------------------------------------------------------------------------------------------------------------------------------------------------------------------------------------------------------------------------------------------------------------------------------------------------------------------------------------------------------------------------------------------------------------------------------------------------------------------------------------------------------------------------------------------------------------------------------------------------------------------------------------------------------------------------------------------------------------------------------------------------------------------------------------------------------------------------------------------------------------------------------------------------------------------------------------------------------------------------------------------------------------------------------------------------------------------------------------------------------------------------------------------------------------------------------------------------------------------------------------------------------------------------------------------------------------------------------------------------------------------------------------------------------------------------------------------------------|-----|
| GO:0003674 | molecular_function | 581/581 | 15274/17046 | 6.22E-29 | 5.40E-26 | 5.05E-26 | AKT3/ABI1/TANK/CD300LD/GNE/ZNF783/CDH9/CDH12/SUGP2/FARP1/KLRG1/RCAN2/CDKN1C/SPEG/MRVI1/TRDN/SPON2/COG5/PITRM1/TACC2/MTHFS/CELF1/RFPL2/PNRC1/TMED10/RER1/ESM1/ADAM29/HNRNPUL1/RPP14/CH13L1/ERLIN2/CH13L2/PKP3/EGLN2/TP53TG1/ATXN2L/KIF12/ACOT7/PDAP1/EXOC3/CHRNA1/CHRNA2/CARD16/GPRIN1/SORCS1/GBP4/PANX3/RBP7/GALNT15/AP3S1/FAT3/CLN5/MRPL52/CCR1/SLC51B/TNFAIP8L1/MOB3A/CNP/LRR1Q3/NEU4/COL9A3/COMP/MAP3K8/ADM/IL31RA/EGFLAM/UBLCP1/OR2A14/CPM/CP51/NDUFAF6/PXDNL/CRABP1/ZNF358/CRYBB3/MIB2/PARP4/MPP7/LDLRAD3/FAM101A/B3GLCT/MGAT5B/CSTA/KLC3/ABCC13/SMYD1/SGOL1/PPM11/SH3D19/CYLD/MBOAT1/ESCO2/CYP11A1/ZNF782/CALML6/DB1/LONRF2/DDOST/ZNF366/BHLHA15/PPP1R18/DIO3/DLG2/DMBT1/DNAH6/ABAT/DPH1/DTNA/AGXT/EEF2/EFNA2/EIF4G1/A2M/ELK4/ANKRD23/LIPH/SLC10A4/ENO2/ADCK5/EPHA1/ESR1/F11/FAH/FAT2/SPATA13/PRSS54/FCGR2A/PHACTR1/FGA/FGF10/FHIT/TRAK1/MSRB2/FOXL1/FOXC2/EXPH5/AKR1B1/NFASC/EPB41L3/GGA3/DIP2A/FLOT2/MCL1/TBC1D1/RHOBTB2/NUP210/NEDD4L/SYNE1/PSD3/PPP1R13B/PUM2/ARHGEF18/RBYP/MORC3/MAK8IP2/TSSK2/VGLL2/TLL10/SLC37A4/RASGEF1C/RNF144B/ZNF549/CCDC110/ST6GALNAC3/SAMM50/DFNB31/ALS2CL/PNKD/ACOT11/STEAP2/FBXL21/LCE2B/SACS/GATM/GBGT1/SLC17A5/ADGRF1/RPS6K1/PABPC1/AKAP8L/DNAJC2/FGF22/NPTN/PDE7B/CYTH4/AMPD3/DHHD/BMP10/ZNF638/C11orf31/ZNF311/TMPRSS12/ZNF844/THEM5/GPR26/EOGT/FFAR2/TRIM42/GRB10/MRPS18B/GRIK4/DNAJC15/SCG3/TMOD4/GUCY1A3/GPR132/PADI1/HAS1/SOX8/HK1/HLA-DOA/HLA-DPA1/ANXA13/NR4A1/ACACB/HOXC4/AGFG2/HRH1/HSD11B1/HSPA1L/HSP90AB1/HTR3A/DUPD1/ADAMTSL5/ANKRD45/TFAP2E/ID3/ZC3H12D/RSPO2/NME9/IGF1/IGF2/GPR142/LCE1C/LCE1D/LCE2D/IL1R1/IL1RN/IL10RA/AQP2/IL11RA/IL12RB2/IL15RA/PRSS41/IL16/FOXK2/AQP5/INHBA/INPP5A/IRF1/AQP9/ITGA7/ITGB2/ITGB7/ITIH4/IVL/JUP/CD82/USP50/KCNH2/KCNJ8/KCNJ9/KCNMB1/KDR/KIF25/IPO5/C17orf82/CLEC17A/HES5/RBM12B/AFF3/LAIR2/LAMA3/STMN1/OR2A5/LCP1/LDLR/ARHGDI1/LGALS9/LHCGR/C11orf87/LMNA/LMO2/RAB19/LPP/MC2R/MCC/ME2/MFNG/MGAT1/SCGB2A1/MITF/LHX8/ASGR1/MOCS1/MOV10/MPZ/PLEKHG7/MYH4/MYL2/NUBP1/NDUFB4/DRG1/NEU1/ATP1A2/NFATC3/NHLH2/NPPC/NRAS/OAS2/RNF165/OPRL1/OR2C1/OR3A2/SLC22A18/P2RY6/PFAH2/ATP5B/IL21R1/ANO7/PARK2/SPOCK3/BOLA1/UTP11L/PRR16/CHST15/PCYOX1/C11orf73/SIRT6/PDE6B/ATP8A2/PI3/PITX2/PKHD1/PKM/PLA2G2A/PLAGL1/LRP1B/PRKAG3/PML/FXYD6/GPR84/SLCO1C1/PNLIP/TLR9/TREM1/SSH1/RIN2/POU2AF1/APBB1P/MXR8/FBLIM1/TP63/CYP2W1/RPP25/TTC12/BANP/PPP1CB/HERC6/ELP3/DNAJC17/GOLPH3L/PPP2R2B/FANCI/MOB1A/SLC47A1/SLC29A3/MIS18BP1/TRPV6/SLC30A10/CHRNA9/THUMPDI/PEX26/FRMD4A/CARKD/PARVA/PRKAR1B/TTC17/IFT122/MCTP2/LMBRD1/CSGALNACT1/PAG1/CISD1/MYNN/APOBR/MAK3/MAK2/PCDHGB3/PRKRIR/PROC/MRAP/TRPV5/PRMT8/HTRA1/SLAMF8/CD42SE1/PAK6/ARNTL2/RGMA/PRDM11/PSMD7/SLURP1/PTGFR/PLEKHG5/TENM2/GATAD2B/ERMN/RNF150/RDH14/MARK4/PTPRE/CREBZF/ABHD17C/FAM60A/ACTA2/RFC2/TRIM27/RGR/RGS12/RIT2/RPA3/BGLAP/SCT/CCL11/ABHD4/MRPS14/PRSS22/NPAS3/PARVG/NOD2/TINAGL1/ARHGAP9/GZF1/DNAI2/PCDH20/VPS33A/BMP4/SLC4A1/SPATS2/ZNF649/ZG16/SLC6A12/SLC8A1/SLC9A3/SLC20A2/BMPR1B/SLIT1/BRD9/ZSCAN18/TMEM108/BOK/BPI/SRP68/STAT2/STK3/SUPT6H/BST2/TCEB2/ZEB1/TEAD3/TERF1/TGM2/TCHH/TNFAIP3/TNFRSF1A/TRAFA5/TRPC6/TRPM2/CCR2/TNFRSF4/UCP1/WNT10B/ZAP70/ZNF7/CA7/CACNA1E/MOGS/RAB7A/ER13/CCDC86/CARD14/BCL2L14/CERS4/IGFLR1/ZNF665/CSPP1/ERMP1/CALD1/FAM188A/TMEM62/GPR157/ZC3H12A/FAAP100/CPEB4/C6orf25/ZNF436/EEPDI/CALR/QTRT1/SLIRP/CAST/CAPZB/DYNLRB2/SLC25A18/ANTXR1/BFSP2/ATP13A4/YIPF4/ZNF397/NROB2/CASQ1/HOPX/PARD6G/KRBA1/TTBK1/RETNLB/TRIM63/GTPBP3/RAE1/PPFIBP2/SLC43A1/IFITM1/SCIN/CDK10/KMO/RUNX1/TP63/RUNX3/SERPINA6/IRS2/ACTN1/CRADD/TNFRSF11A/ALDH1A2/STK19/SYNJ2/SPHK1/BUD31/CCNA1/ENDOU/SKAP2/STBD1/SLAMF9/CH25H/CCRL2/ERI1/PRC1/STARD13/PIAS2/MAP3K6/SYT7/SLC16A3/CBFA2T2/RSAD2/AURKB/DAPL1/CD8A/CCDC102A/NEURL3/TRIP10/ADIPQ/ENTPD3/PREPL/RAB36/MICAL2/N4BP1/VGLL4/NUP93/RAPGEF2/CD79A/DAZAP2/ZBTB39/IQSEC1/LPGAT1/FGF19/NR1H4 | 581 |
| GO:0005488 | binding            | 489/581 | 12915/17046 | 3.40E-07 | 0.00015  | 0.00014  | AKT3/ABI1/TANK/CD300LD/GNE/ZNF783/CDH9/CDH12/SUGP2/FARP1/KLRG1/RCAN2/CDKN1C/SPEG/MRVI1/TRDN/SPON2/COG5/PITRM1/TACC2/MTHFS/CELF1/RFPL2/PNRC1/TMED10/RER1/ESM1/ADAM29/HNRNPUL1/RPP14/CH13L1/ERLIN2/CH13L2/PKP3/EGLN2/ATXN2L/KIF12/ACOT7/PDAP1/EXOC3/CHRNA1/CHRNA2/GPRIN1/SORCS1/GBP4/RBP7/GALNT15/AP3S1/FAT3/CLN5/CCR1/SLC51B/TNFAIP8L1/MOB3A/CNP/LRR1Q3/NEU4/COMP/MAP3K8/ADM/IL31RA/EGFLAM/UBLCP1/CPM/CP51/PXDNL/CRABP1/ZNF358/CRYBB3/MIB2/PARP4/MPP7/LDLRAD3/FAM101A/MGAT5B/CSTA/KLC3/ZNF738/ABCC13/SMYD1/SGOL1/PPM11/SH3D19/CYLD/ESCO2/CYP11A1/ZNF782/CALML6/DB1/LONRF2/DDOST/ZNF366/BHLHA15/PPP1R18/DLG2/DMBT1/DNAH6/ABAT/DPH1/DTNA/AGXT/EEF2/EFNA2/EIF4G1/A2M/ELK4/ANKRD23/LIPH/ENO2/ADCK5/EPHA1/ESR1/F11/FAH/FAT2/SPATA13/PRSS54/FCGR2A/PHACTR1/FGA/FGF10/FHIT/TRAK1/MSRB2/FOXL1/FOXC2/EXPH5/NFASC/EPB41L3/GGA3/DIP2A/FLOT2/MCL1/TBC1D1/RHOBTB2/NUP210/NEDD4L/SYNE1/PPP1R13B/PUM2/RYBP/MORC3/MAK8IP2/TSSK2/VGLL2/TLL10/RNF144B/ZNF549/CCDC110/SAMM50/DFNB31/ALS2CL/PNKD/ACOT11/STEAP2/SACS/GBGT1/RPS6K1/PABPC1/AKAP8L/DNAJC2/FGF22/NPTN/PDE7B/CYTH4/AMPD3/BMP10/ZNF638/C11orf31/ZNF311/ZNF844/THEM5/FFAR2/TRIM42/GRB10/DNAJC15/SCG3/TMOD4/GUCY1A3/PADI1/SOX8/HK1/HLA-DOA/HLA-DPA1/ANXA13/NR4A1/ACACB/HOXC4/AGFG2/HRH1/HSPA1L/HSP90AB1/HTR3A/ADAMTSL5/ANKRD45/TFAP2E/ID3/ZC3H12D/RSPO2/IGF1/IGF2/LCE2D/IL1R1/IL1RN/IL10RA/IL12RB2/IL15RA/IL16/FOXK2/AQP5/INHBA/INPP5A/IRF1/ITGA7/ITGB2/ITGB7/ITIH4/IVL/JUP/CD82/KCNH2/KCNJ8/KCNJ9/KDR/KIF25/IPO5/C17orf82/CLEC17A/HES5/RBM12B/AFF3/LAIR2/LAMA3/STMN1/LCP1/LDLR/ARHGDI1/LGALS9/LHCGR/C11orf87/LMNA/LMO2/RAB19/LPP/MC2R/MCC/ME2/MFNG/MGAT1/SCGB2A1/MITF/LHX8/ASGR1/MOCS1/MOV10/MYH4/MYL2/NUBP1/DRG1/ATP1A2/NFATC3/NHLH2/NPPC/NRAS/OAS2/RNF165/OPRL1/OR2C1/OR3A2/SLC22A18/P2RY6/PFAH2/ATP5B/IL21R1/ANO7/PARK2/SPOCK3/BOLA1/UTP11L/PRR16/CHST15/PCYOX1/C11orf73/SIRT6/PDE6B/ATP8A2/PITX2/PKHD1/PKM/PLA2G2A/PLAGL1/LRP1B/PRKAG3/PML/FXYD6/PNLIP/TLR9/TREM1/SSH1/POU2AF1/APBB1P/FBLIM1/MED18/CYP2W1/RPP25/TTC12/BANP/PPP1CB/ELP3/DNAJC17/GOLPH3L/PPP2R2B/FANCI/MOB1A/MIS18BP1/TRPV6/CHRNA9/THUMPDI/PEX26/FRMD4A/CARKD/PARVA/PRKAR1B/TTC17/IFT122/MCTP2/LMBRD1/CSGALNACT1/PAG1/CISD1/MYNN/MAK3/MAK2/PCDHGB3/PRKRIR/PROC/MRAP/TRPV5/PRMT8/HTRA1/PAK6/ARNTL2/RGMA/PSMD7/SLURP1/TENM2/GATAD2B/ERMN/RNF150/MARK4/PTPRE/CREBZF/FAM60A/ACTA2/RFC2/TRIM27/RGR/RIT2/RPA3/BGLAP/SCT/CCL11/MRPS14/PRSS22/NPAS3/PARVG/NOD2/TINAGL1/ARHGAP9/GZF1/DNAI2/PCDH20/VPS33A/BMP4/SLC4A1/SPATS2/ZNF649/ZG16/SLC6A12/SLC8A1/SLC9A3/BMPR1B/SLIT1/BRD9/ZSCAN18/BOK/BPI/SRP68/STAT2/STK3/SUPT6H/BST2/TCEB2/ZEB1/TEAD3/TERF1/TGM2/TCHH/TNFAIP3/TNFRSF1A/TRAFA5/TRPC6/CCR2/WNT10B/ZAP70/ZNF7/CA7/CACNA1E/RAB7A/ER13/CCDC86/CARD14/BCL2L14/CERS4/IGFLR1/ZNF665/CSPP1/ERMP1/CALD1/FAM188A/ZC3H12A/FAAP100/CPEB4/C6orf25/ZNF436/EEPDI/CALR/QTRT1/SLIRP/CAST/CAPZB/SLC25A18/ANTXR1/BFSP2/ATP13A4/YIPF4/ZNF397/NROB2/CASQ1/HOPX/PARD6G/TTBK1/RETNLB/TRIM63/GTPBP3/RAE1/IFITM1/SCIN/CDK10/KMO/RUNX1/TP63/RUNX3/SERPINA6/IRS2/ACTN1/CRADD/TNFRSF11A/ALDH1A2/STK19/SYNJ2/SPHK1/BUD31/CCNA1/ENDOU/SKAP2/STBD1/CH25H/CCRL2/ERI1/PRC1/STARD13/PIAS2/MAP3K6/SYT7/SLC16A3/CBFA2T2/RSAD2/AURKB/DAPL1/CD8A/NEURL3/TRIP10/ADIPQ/ENTPD3/RAB36/MICAL2/N4BP1/VGLL4/RAPGEF2/CD79A/DAZAP2/ZBTB39/IQSEC1/FGF19/NR1H4                                                                                                                                                                                                                                                                                                                                                                                                                                                                                                                                                                          | 489 |

|                                         |                               |           |            |          |          |         |                                                                                                                                                                                                                                                                                                                                                                                                                                                                                                                                                                                                                                                                                                                                                                                                                                                                                                                                                                                                                                                                                                                                                                                                                                                                                                                                                                                                                                                                                                                                                                                                                                                                                                                                                                                                                                                                                                                                                                                                                                                                                                                                                                                                                                                                                                                                                                                                       |       |
|-----------------------------------------|-------------------------------|-----------|------------|----------|----------|---------|-------------------------------------------------------------------------------------------------------------------------------------------------------------------------------------------------------------------------------------------------------------------------------------------------------------------------------------------------------------------------------------------------------------------------------------------------------------------------------------------------------------------------------------------------------------------------------------------------------------------------------------------------------------------------------------------------------------------------------------------------------------------------------------------------------------------------------------------------------------------------------------------------------------------------------------------------------------------------------------------------------------------------------------------------------------------------------------------------------------------------------------------------------------------------------------------------------------------------------------------------------------------------------------------------------------------------------------------------------------------------------------------------------------------------------------------------------------------------------------------------------------------------------------------------------------------------------------------------------------------------------------------------------------------------------------------------------------------------------------------------------------------------------------------------------------------------------------------------------------------------------------------------------------------------------------------------------------------------------------------------------------------------------------------------------------------------------------------------------------------------------------------------------------------------------------------------------------------------------------------------------------------------------------------------------------------------------------------------------------------------------------------------------|-------|
| GO:0060089                              | molecular transducer activity | 90/581    | 1631/17046 | 2.80E-06 | 0.00081  | 0.00076 | KLRG1/CHRNA1/CHRNA2/SORCS1/CCR1/MAP3K8/IL31RA/OR2A14/MIB2/DMBT1/EPHA1/ESR1/ADGRF1/NPTN/GPR26/FFAR2/GRIK4/GUCY1A3/GPR132/HLA-DOA/HLA-DPA1/NR4A1/HRH1/HTR3A/GPR142/IL1R1/IL10RA/IL11RA/IL12RB2/IL15RA/ITGB2/ITGB7/JUP/KCNH2/KDR/STMN1/OR2A5/LDLR/LGALS9/LHCGR/MC2R/MCC/ASGR1/OPRL1/OR2C1/OR3A2/P2RY6/IL21R/PKHD1/LRP1B/GPR84/TLR9/TREM1/CHRNA9/APOBR/SLAMF8/RGMA/PTGFR/PLEKHG5/PTPRE/TRIM27/RGR/RGS12/TINAGL1/SLC20A2/BMPR1B/S TAT2/STK3/BST2/TNFRSF1A/TRAFF5/CCR2/TNFRSF4/GPR157/ANTXR1/NROB2/TRIM63/IFITM1/IRS2/TNFRSF11A/SPHK1/ENDOU/SLAMF9/CCR2/MAP3K6/CD8A/RAPGEF2/CD79A/NR1H4                                                                                                                                                                                                                                                                                                                                                                                                                                                                                                                                                                                                                                                                                                                                                                                                                                                                                                                                                                                                                                                                                                                                                                                                                                                                                                                                                                                                                                                                                                                                                                                                                                                                                                                                                                                                                     | 90    |
| GO:0004872                              | receptor activity             | 73/581    | 1364/17046 | 7.40E-05 | 0.01606  | 0.01502 | KLRG1/CHRNA1/CHRNA2/SORCS1/CCR1/IL31RA/OR2A14/DMBT1/EPHA1/ESR1/ADGRF1/NPTN/GPR26/FFAR2/GRIK4/GUCY1A3/GPR132/HLA-DOA/HLA-DPA1/NR4A1/HRH1/HTR3A/GPR142/IL1R1/IL10RA/IL11RA/IL12RB2/IL15RA/ITGB2/ITGB7/KCNH2/KDR/OR2A5/LDLR/LHCGR/MC2R/MCC/ASGR1/OPRL1/OR2C1/OR3A2/P2RY6/IL21R/PKHD1/LRP1B/GPR84/TLR9/TREM1/CHRNA9/APOBR/SLAMF8/RGMA/PTGFR/PLEKHG5/PTPRE/TRIM27/RGR/RGS12/BMPR1B/STAT2/STK3/BST2/TNFRSF1A/TRAFF5/CCR2/TNFRSF4/GPR157/ANTXR1/NR0B2/TNFRSF11A/SPHK1/ENDOU/SLAMF9/CCR2/CD8A/CD79A/NR1H4                                                                                                                                                                                                                                                                                                                                                                                                                                                                                                                                                                                                                                                                                                                                                                                                                                                                                                                                                                                                                                                                                                                                                                                                                                                                                                                                                                                                                                                                                                                                                                                                                                                                                                                                                                                                                                                                                                     | 73    |
| GO:0004871                              | signal transducer activity    | 75/581    | 1444/17046 | 0.00015  | 0.02624  | 0.02453 | CHRNA1/CHRNA2/SORCS1/CCR1/MAP3K8/IL31RA/OR2A14/MIB2/DMBT1/EPHA1/ESR1/ADGRF1/NPTN/GPR26/FFAR2/GRIK4/GPR132/HLA-DOA/HLA-DPA1/NR4A1/HRH1/HTR3A/GPR142/IL1R1/IL10RA/IL11RA/IL12RB2/IL15RA/ITGB2/JUP/KCNH2/KDR/STMN1/OR2A5/LGALS9/LHCGR/MC2R/OPRL1/OR2C1/OR3A2/P2RY6/IL21R/G PR84/TLR9/CHRNA9/MAPK3/RGMA/PTGFR/PLEKHG5/PTPRE/TRIM27/RGR/RGS12/BMPR1B/STAT2/STK3/BST2/TNFRSF1A/TRAFF5/CCR2/TNFRSF4/GPR157/ANTXR1/NROB2/TRIM63 /IFITM1/IRS2/TNFRSF11A/SPHK1/CCR2/MAP3K6/CD8A/RAPGEF2/CD79A/NR1H4                                                                                                                                                                                                                                                                                                                                                                                                                                                                                                                                                                                                                                                                                                                                                                                                                                                                                                                                                                                                                                                                                                                                                                                                                                                                                                                                                                                                                                                                                                                                                                                                                                                                                                                                                                                                                                                                                                             | 75    |
| GO:0004896                              | cytokine receptor activity    | 10/581    | 80/17046   | 0.00038  | 0.04963  | 0.04641 | CCR1/IL31RA/IL1R1/IL10RA/IL11RA/IL12RB2/IL15RA/IL21R/CCR2/CCRL2                                                                                                                                                                                                                                                                                                                                                                                                                                                                                                                                                                                                                                                                                                                                                                                                                                                                                                                                                                                                                                                                                                                                                                                                                                                                                                                                                                                                                                                                                                                                                                                                                                                                                                                                                                                                                                                                                                                                                                                                                                                                                                                                                                                                                                                                                                                                       | 10    |
| GO:0005515                              | protein binding               | 372/581   | 9755/17046 | 0.0004   | 0.04963  | 0.04641 | AKT3/ABI1/TANK/CD300LD/GNE/ZNF783/FARP1/KLRG1/CDKN1C/SPEG/MRVI1/TRDN/SPON2/COG5/TACC2/CELF1/PNRC1/TMED10/RER1/ESM1/HNRNPUL1/ERLUN2/PKP3/EGLN2/ ATXN2L/KIF12/ACOT7/EXOC3/GPRIN1/SORCS1/RBP7/AP3S1/CLN5/CCR1/SLC51B/TNFAIP8L1/LRRIQ3/NEU4/COMP/MAP3K8/ADM/IL31RA/UBLCP1/CP51/CRABP1/CRYBB3/MIB2/P ARP4/MPP7/FAM101A/MGAT5B/CSTA/KLC3/SMYD1/SGOL1/SH3D19/CYLD/DBB1/DDOST/ZNF366/BHLHA15/PPP1R18/DLG2/DMBT1/ABAT/DPH1/DTNA/AGXT/EEF2/EFNA2/EIF4G 1/A2M/ELK4/ANKRD23/ADCK5/EPHA1/ESR1/F11/FAH/SPATA13/FCGR2A/PHACTR1/FGA/FGF10/FHIT/TRAK1/MSRB2/FOXC2/EXPH5/NFASC/EPB41L3/GGA3/DIP2A/FLOT2/MLC1/T BC1D1/NUP210/NEDD4L/SYNE1/PPP1R13B/PUM2/RYPB/MAPK8IP2/TSSK2/VGLL2/TLL10/RNF144B/CCDC110/SAMM50/DFNB31/ALS2CL/PNKD/SACS/RPS6K1/PABPC1/AKAP8L/ DNAJC2/FGF22/NPTN/BMP10/ZNF844/THEM5/FFAR2/TRIM42/GRB10/DNAJC15/TMOD4/GUCY1A3/SOX8/HK1/HLA-DOA/NR4A1/ACACB/HOXC4/HSPA1L/HSP90AB1/ADAMTSL5/ANKRD45/TFAP2E/ID3/RSP02/IGF1/IGF2/LCE2D/IL1R1/IL1RN/IL10RA/IL12RB2/IL15RA/IL16/FOXC2/AQP5/INHBA/INP P5A/IRF1/ITGA7/ITGB2/ITGB7/ITIH4/IVL/JUP/CD82/KCNH2/KCNJ8/KCNJ9/KDR/KIF25/IPO5/C17orf82/HE55/RBM12B/LAIR2/LAMA3/STMN1/LCP1/LDLR/ARHGDI2/LGALS9/C11orf8 7/LMNA/LMO2/LPP/MC2R/MCC/SCGB2A1/MITF/LHX8/ASGR1/MOV10/MYH4/MYL2/NUBP1/DRG1/ATP1A2/NFATC3/NHLH2/NPPC/NRAS/OAS2/OPRL1/SLC22A18/P2RY6/ATP5B/P ARK2/BOLA1/UTP11L/PRR16/C11orf73/SIRT6/PITX2/PKHD1/PKM/PRKAG3/PML/FXYD6/TLR9/TREM1/SSH1/POU2AF1/APBB1P/FBLIM1/MED18/RPP25/TTC12/BANP/PPP1CB/ELP3 /GOLPH3L/PPP2R2B/FANCI/MOB1A/MIS18BP1/TRPV6/PEX26/FRMD4A/CARKD/PARVA/PRKAR1B/TTC17/IFT122/LMBRD1/PAG1/MAPK3/MAP2K2/PRKRIR/PROC/MRAP/TRPV5/PR MT8/HTRA1/PAK6/ARNTL2/RGMA/PSMD7/SLURP1/TENM2/GATAD2B/ERMN/MARK4/PTPRE/CREBZF/FAM60A/ACTA2/RFC2/TRIM27/RGR/RIT2/RPA3/SCT/CCL11/NPAS3/PARVG/ NOD2/TINAGL1/ARHGAP9/DNAI2/VPS33A/BMP4/SLC4A1/ZNF649/ZG16/SLC6A12/SLC8A1/SLC9A3/BMPR1B/SLIT1/BRD9/BOK/STAT2/STK3/SUPT6H/BST2/TCEB2/ZEB1/TEAD3/TER F1/TGM2/TCHH/TNFAIP3/TNFRSF1A/TRAFF5/TRPC6/CCR2/WNT10B/ZAP70/RAB7A/CCDC86/CARD14/BCL2L14/IGFLR1/CSPP1/CALD1/FAM188A/ZC3H12A/FAAP100/CPBE4/ZNF436 /CALR/SLIRP/CAST/CAPZB/SLC25A18/ANTXR1/BFSP2/YIPF4/ZNF397/NROB2/HOPX/PARD6G/RETNLB/TRIM63/GTPBP3/RAE1/IFITM1/SCIN/CDK10/RUNX1/TP63/RUNX3/IRS2/ACTN 1/CRADD/TNFRSF11A/SYJ2/SPHK1/BUD31/CCNA1/ENDOU/SKAP2/STBD1/CCRL2/PRC1/STARD13/PIAS2/SYT7/SLC16A3/CBFA2T2/RSAD2/AURKB/DAPL1/CD8A/TRIP10/ADIPOQ/E NTPD3/MICAL2/N4BP1/VGLL4/RAPGEF2/CD79A/DAZAP2/FGF19/NR1H4 | 372   |
| Hypermethylated DMC, Biological Process |                               |           |            |          |          |         |                                                                                                                                                                                                                                                                                                                                                                                                                                                                                                                                                                                                                                                                                                                                                                                                                                                                                                                                                                                                                                                                                                                                                                                                                                                                                                                                                                                                                                                                                                                                                                                                                                                                                                                                                                                                                                                                                                                                                                                                                                                                                                                                                                                                                                                                                                                                                                                                       |       |
|                                         | Description                   | GeneRatio | BgRatio    | pvalue   | p.adjust | qvalue  | geneID                                                                                                                                                                                                                                                                                                                                                                                                                                                                                                                                                                                                                                                                                                                                                                                                                                                                                                                                                                                                                                                                                                                                                                                                                                                                                                                                                                                                                                                                                                                                                                                                                                                                                                                                                                                                                                                                                                                                                                                                                                                                                                                                                                                                                                                                                                                                                                                                | Count |

|            |                                       |         |             |          |          |          |                                                                                                                                                                                                                                                                                                                                                                                                                                                                                                                                                                                                                                                                                                                                                                                                                                                                                                                                                                                                                                                                                                                                                                                                                                                                                                                                                                                                                                                                                                                                                                                                                                                                                                                                                                                                                                                                                                                                                                                              |     |
|------------|---------------------------------------|---------|-------------|----------|----------|----------|----------------------------------------------------------------------------------------------------------------------------------------------------------------------------------------------------------------------------------------------------------------------------------------------------------------------------------------------------------------------------------------------------------------------------------------------------------------------------------------------------------------------------------------------------------------------------------------------------------------------------------------------------------------------------------------------------------------------------------------------------------------------------------------------------------------------------------------------------------------------------------------------------------------------------------------------------------------------------------------------------------------------------------------------------------------------------------------------------------------------------------------------------------------------------------------------------------------------------------------------------------------------------------------------------------------------------------------------------------------------------------------------------------------------------------------------------------------------------------------------------------------------------------------------------------------------------------------------------------------------------------------------------------------------------------------------------------------------------------------------------------------------------------------------------------------------------------------------------------------------------------------------------------------------------------------------------------------------------------------------|-----|
| GO:0008150 | biological_process                    | 311/311 | 15230/17046 | 4.33E-16 | 1.86E-12 | 1.48E-12 | CDH3/TSPAN5/CDH13/MBNL2/KCNMB2/BCKDK/TCIRG1/ABCA9/C1D/ZBTB18/DMRT2/CEL2/TBR1/SEPT9/HCTST/NPFFR2/ADCY3/SLC27A2/HIBADH/PSIP1/PXMP4/B4GALT7/PTH2/ADPRHL1/CHRNA5/ZBED9/CIDEA/ALPK2/CLCA1/ANKRD9/FRMD6/C15orf27/ZG16B/SLC38A10/APOA1BP/COL11A1/GALM/SCLT1/ZFP42/CPD/TRPM6/APCDD1/CTGF/LRRC34/CYB561/ADRB3/FITM1/ADAL/TRPV3/ZNF709/ZNF781/CITED4/WBP2NL/RNF168/COCH/NLRP6/DNAH8/DNMT3A/DRD4/DSG3/ECE1/EGFR/EGR3/PATL2/TMEM17/EML1/UNC13D/DNAH12/EPHA3/EPHB4/ALAS1/RNF182/SP8/XRN2/RASA3/PPM1E/VASH1/ACIN1/LIMCH1/TBC1D9B/FOXO1/SPG20/FLNB/ATP11A/LARP1/MTOR/FUCA1/GABBR1/DSCN9/GAK/TENM4/LTN1/RGS22/FBXO2/GAPDH5/GJA3/GJB2/AMPD2/SDCBP2/DKK3/GLS2/VPS4A/GPR162/GNAS/CRACR2B/PIGW/IZUMO1/GPER1/DOK7/FLVCR1/ZBTB44/GSTP1/GTF2B/BRF1/NME7/GZMA/ANXA2/SERPIND1/KCNIP2/NRG1/ANXA6/HLA-B/HLA-E/HLA-F/HLX/HMGA1/HPCA/APBA2/HOXB3/HOXC5/HOXC6/HOXD3/HSD17B2/ACADL/HSP90AA1/HTR5A/FMN1/BARHL2/CYR61/IL6/ISL1/ITIH3/HILS1/ATP9B/ACAT1/KRT7/KRT15/INSC/TOMM20L/SLC6A17/RESP18/CDHR4/LCK/LLGL1/LOX/LTB/LTBP1/SMAD3/ME1/MEF2D/MAP3K1/MEOX1/MEOX2/MFI2/MT1A/NUDT1/NEDD9/NFYB/NMBR/NOV/NTF3/PALM/ARHGEF3/LEF1/DDX47/CEND1/ANGPT4/PDE4C/PDE7A/GALNT7/PGAM2/PIGC/PIK3CG/SPA17/PLEC/IL20RB/RIPK4/CYTL1/POMC/PON1/MOV10L1/ZDHC13/ROBO4/BNC2/LPCAT2/PPP1CC/PIWIL2/ARHGEF10L/PRMT6/ZNF532/WDR33/SMPD3/CNOT11/SYBU/LIMS2/VAC14/PRKD1/BIN3/PCDHG4/PCDHG7/PCDHGA11/MASP1/PSMB4/TRPC7/LPAR5/ACTR3B/METTL14/CCAR2/PTPRCAP/PXN/RASGRF2/EXOC4/RPL8/DEFB134/RPL29/S100A4/S100A6/CCL17/C19orf33/SFRP2/CXCR5/TRA2B/SGK1/SYNDIG1L/MICAL1/CERK/SOX9/STK7/VAMP2/TAF4B/TBP/TCEA1/ACTC1/TIMP3/TLE3/TLR5/TRAPP10/TNXB/TRA1/TRPCA/PHLDA2/TWIST1/UPP1/VARS/YWHAG/ZNF124/ZNF177/PTP4A1/CACNB2/PAX8/CXCR4/FZD5/REEP5/PPDPF/GDPD3/TMEM204/NLRX1/EPHX3/ZC3H14/ZNF606/RAB11F1P1/RNF39/COL18A1/UNC93B1/CAPS/COLQ/HIST1H2BM/SH3BGL3/SCRT1/HIST1H3A/SLA2/PARD6B/IL1F10/SPINK7/KDM2B/LOXL3/MGARP/CBX2/GAS7/FADD/LIMD1/MAP7/ZFAND2A/LDB2/SMGT1/RCS1/IL32/REEP6/SDR42E1/ARHGAP29/LY86/RAB3D/H2AFY/SMAD5-AS1/MTL5/ARHGEF10/ULK2/USP6NL/TELO2/RABGAP1L | 311 |
| GO:0007275 | multicellular_organismal_development  | 132/311 | 4527/17046  | 7.10E-10 | 1.52E-06 | 1.21E-06 | CDH3/CDH13/ZBTB18/DMRT2/TBR1/SLC38A10/COL11A1/SCLT1/ZFP42/APCDD1/CTGF/RNF168/DNMT3A/DRD4/ECE1/EGFR/EGR3/EML1/EPHA3/EPHB4/SP8/RASA3/VASH1/ACIN1/FOXO1/SPG20/FLNB/MTOR/TENM4/GJB2/SDCBP2/DKK3/VPS4A/GNAS/GPER1/FLVCR1/GSTP1/NME7/ANXA2/KCNIP2/NRG1/HLA-B/HLX/HPCA/APBA2/HOXB3/HOXC5/HOXC6/HOXD3/HSD17B2/HSP90AA1/HTR5A/FMN1/BARHL2/CYR61/IL6/ISL1/HILS1/ACAT1/INSC/SLC6A17/RESP18/LCK/LLGL1/LOX/LTB/SMA D3/MEF2D/MAP3K1/MEOX1/MEOX2/NOV/NTF3/PALM/LEF1/CEND1/ANGPT4/PIK3CG/CYTL1/MOV10L1/ROBO4/BNC2/PPP1CC/PIWIL2/SMPD3/LIMS2/PRKD1/BIN3/PSMB4/TRPC 7/PXN/RASGRF2/RPL29/S100A4/S100A6/CCL17/SFRP2/CXCR5/TRA2B/SGK1/SOX9/TCEA1/ACTC1/TIMP3/TLE3/TLR5/TRPCA/PHLDA2/TWIST1/YWHAG/ZNF124/ZNF177/PTP4A1/CACNB2/PAX8/CXCR4/FZD5/PPDPF/TMEM204/COL18A1/COLQ/SCRT1/PARD6B/KDM2B/LOXL3/CBX2/GAS7/FADD/LIMD1/LDB2/H2AFY/MTL5/ARHGEF10/ULK2                                                                                                                                                                                                                                                                                                                                                                                                                                                                                                                                                                                                                                                                                                                                                                                                                                                                                                                                                                                                                                                                                                                                                               | 132 |
| GO:0048856 | anatomical_structure_development      | 136/311 | 4751/17046  | 1.14E-09 | 1.63E-06 | 1.30E-06 | CDH3/CDH13/ZBTB18/DMRT2/TBR1/FRMD6/SLC38A10/COL11A1/SCLT1/ZFP42/APCDD1/CTGF/RNF168/COCH/DNMT3A/DRD4/ECE1/EGFR/EGR3/TMEM17/EML1/UNC13D/EPHA3/EPHB4/SP8/RASA3/VASH1/ACIN1/FOXO1/SPG20/FLNB/MTOR/TENM4/GAPDH5/GJB2/SDCBP2/DKK3/GNAS/GPER1/FLVCR1/GSTP1/NME7/ANXA2/KCNIP2/NRG1/HLA-B/HLX/HPCA/APBA2/HOXB3/HOXC5/HOXC6/HOXD3/HSD17B2/HSP90AA1/HTR5A/FMN1/BARHL2/CYR61/IL6/ISL1/HILS1/ACAT1/KRT15/INSC/SLC6A17/RESP18/LCK/LLGL1/LOX/LTB/SMAD3/MEF2D/MAP3K1/MEOX1/MEOX2/MFI2/NOV/NTF3/PALM/LEF1/CEND1/ANGPT4/PIK3CG/RIPK4/CYTL1/MOV10L1/ROBO4/BNC2/PPP1CC/PIWIL2/SMPD3/LIMS2/PRKD1/BIN3/PSMB4/TRPC7/PXN/RASGRF2/S100A4/S100A6/CCL17/SFRP2/CXCR5/TRA2B/SGK1/SOX9/TAF4B/TCEA1/ACTC1/TIMP3/TLE3/TLR5/TRPCA/PHLDA2/TWIST1/YWHAG/CACNB2/PAX8/CXCR4/FZD5/PPDPF/TMEM204/COL18A1/COLQ/SCRT1/PARD6B/KDM2B/LOXL3/CBX2/GAS7/FADD/LIMD1/LDB2/H2AFY/MTL5/ARHGEF10/ULK2                                                                                                                                                                                                                                                                                                                                                                                                                                                                                                                                                                                                                                                                                                                                                                                                                                                                                                                                                                                                                                                                                                                                           | 136 |
| GO:0048731 | system_development                    | 119/311 | 4014/17046  | 3.49E-09 | 3.74E-06 | 2.98E-06 | CDH3/CDH13/ZBTB18/DMRT2/TBR1/SLC38A10/COL11A1/SCLT1/ZFP42/APCDD1/CTGF/RNF168/DNMT3A/DRD4/ECE1/EGFR/EGR3/EML1/EPHA3/EPHB4/RASA3/VASH1/ACIN1/FOXO1/SPG20/FLNB/MTOR/TENM4/GJB2/SDCBP2/DKK3/GNAS/GPER1/FLVCR1/GSTP1/NME7/ANXA2/KCNIP2/NRG1/HLA-B/HLX/HPCA/APBA2/HOXB3/HOXC5/HOXC6/HOXD3/HSD17B2/HSP90AA1/HTR5A/FMN1/BARHL2/CYR61/IL6/ISL1/ACAT1/INSC/SLC6A17/LCK/LLGL1/LOX/LTB/SMAD3/MEF2D/MAP3K1/MEOX1/MEOX2/NOV/NTF3/PALM/LEF1/CEND1/ANGPT4/PIK3CG/CYTL1/ROBO4/BNC2/PPP1CC/SMPD3/LIMS2/PRKD1/BIN3/PSMB4/TRPC7/RASGRF2/S100A4/S100A6/SFRP2/CXCR5/TRA2B/SGK1/SOX9/TCEA1/ACTC1/TIMP3/TLE3/TLR5/TRPCA/PHLDA2/TWIST1/YWHAG/CACNB2/PAX8/CXCR4/FZD5/PPDPF/TMEM204/COL18A1/COLQ/SCRT1/PARD6B/KDM2B/LOXL3/GAS7/FADD/LDB2/H2AFY/ARHGEF10/ULK2                                                                                                                                                                                                                                                                                                                                                                                                                                                                                                                                                                                                                                                                                                                                                                                                                                                                                                                                                                                                                                                                                                                                                                                                                                                            | 119 |
| GO:0044767 | single-organism_developmental_process | 144/311 | 5251/17046  | 5.31E-09 | 4.55E-06 | 3.63E-06 | CDH3/CDH13/ZBTB18/DMRT2/TBR1/FRMD6/SLC38A10/COL11A1/SCLT1/ZFP42/APCDD1/CTGF/ADRB3/RNF168/COCH/DNMT3A/DRD4/ECE1/EGFR/EGR3/TMEM17/EML1/UNC13D/EPHA3/EPHB4/SP8/RASA3/VASH1/ACIN1/FOXO1/SPG20/FLNB/MTOR/TENM4/GAPDH5/GJB2/SDCBP2/DKK3/VPS4A/GNAS/GPER1/FLVCR1/GSTP1/NME7/ANXA2/KCNIP2/NRG1/HLA-B/HLX/HMGA1/HPCA/APBA2/HOXB3/HOXC5/HOXC6/HOXD3/HSD17B2/HSP90AA1/HTR5A/FMN1/BARHL2/CYR61/IL6/ISL1/HILS1/ACAT1/INSC/SLC6A17/RESP18/LCK/LLGL1/LOX/LTB/SMAD3/MEF2D/MAP3K1/MEOX1/MEOX2/MFI2/NOV/NTF3/PALM/LEF1/CEND1/ANGPT4/PIK3CG/RIPK4/CYTL1/MOV10L1/ROBO4/BNC2/PPP1CC/PIWIL2/PRMT6/SMPD3/LIMS2/PRKD1/BIN3/PSMB4/TRPC7/METTL14/PXN/RASGRF2/RPL29/S100A4/S100A6/CCL17/SFRP2/CXCR5/TRA2B/SGK1/SOX9/TAF4B/TCEA1/ACTC1/TIMP3/TLE3/TLR5/TRPCA/PHLDA2/TWIST1/YWHAG/PTP4A1/CACNB2/PAX8/CXCR4/FZD5/PPDPF/TMEM204/COL18A1/COLQ/SCRT1/PARD6B/KDM2B/LOXL3/CBX2/GAS7/FADD/LIMD1/LDB2/H2AFY/MTL5/ARHGEF10/ULK2                                                                                                                                                                                                                                                                                                                                                                                                                                                                                                                                                                                                                                                                                                                                                                                                                                                                                                                                                                                                                                                                                                    | 144 |
| GO:0032502 | developmental_process                 | 145/311 | 5327/17046  | 7.59E-09 | 5.42E-06 | 4.33E-06 | CDH3/CDH13/ZBTB18/DMRT2/TBR1/FRMD6/SLC38A10/COL11A1/SCLT1/ZFP42/APCDD1/CTGF/ADRB3/RNF168/COCH/DNMT3A/DRD4/ECE1/EGFR/EGR3/TMEM17/EML1/UNC13D/EPHA3/EPHB4/SP8/RASA3/VASH1/ACIN1/FOXO1/SPG20/FLNB/MTOR/TENM4/GAPDH5/GJB2/SDCBP2/DKK3/VPS4A/GNAS/GPER1/FLVCR1/GSTP1/NME7/ANXA2/KCNIP2/NRG1/HLA-B/HLX/HMGA1/HPCA/APBA2/HOXB3/HOXC5/HOXC6/HOXD3/HSD17B2/HSP90AA1/HTR5A/FMN1/BARHL2/CYR61/IL6/ISL1/HILS1/ACAT1/KRT15/INSC/SLC6A17/RESP18/LCK/LLGL1/LOX/LTB/SMAD3/MEF2D/MAP3K1/MEOX1/MEOX2/MFI2/NOV/NTF3/PALM/LEF1/CEND1/ANGPT4/PIK3CG/RIPK4/CYTL1/MOV10L1/ROBO4/BNC2/PPP1CC/PIWIL2/PRMT6/SMPD3/LIMS2/PRKD1/BIN3/PSMB4/TRPC7/METTL14/PXN/RASGRF2/RPL29/S100A4/S100A6/CCL17/SFRP2/CXCR5/TRA2B/SGK1/SOX9/TAF4B/TCEA1/ACTC1/TIMP3/TLE3/TLR5/TRPCA/PHLDA2/TWIST1/YWHAG/PTP4A1/CACNB2/PAX8/CXCR4/FZD5/PPDPF/TMEM204/COL18A1/COLQ/SCRT1/PARD6B/KDM2B/LOXL3/CBX2/GAS7/FADD/LIMD1/LDB2/H2AFY/MTL5/ARHGEF10/ULK2                                                                                                                                                                                                                                                                                                                                                                                                                                                                                                                                                                                                                                                                                                                                                                                                                                                                                                                                                                                                                                                                                              | 145 |

|            |                                  |         |             |          |          |          |                                                                                                                                                                                                                                                                                                                                                                                                                                                                                                                                                                                                                                                                                                                                                                                                                                                                                                                                                                                                                                                                                                                                                                                                                                                                                                                                                                                                                                                                                                                                                                                                                                                                                                 |     |
|------------|----------------------------------|---------|-------------|----------|----------|----------|-------------------------------------------------------------------------------------------------------------------------------------------------------------------------------------------------------------------------------------------------------------------------------------------------------------------------------------------------------------------------------------------------------------------------------------------------------------------------------------------------------------------------------------------------------------------------------------------------------------------------------------------------------------------------------------------------------------------------------------------------------------------------------------------------------------------------------------------------------------------------------------------------------------------------------------------------------------------------------------------------------------------------------------------------------------------------------------------------------------------------------------------------------------------------------------------------------------------------------------------------------------------------------------------------------------------------------------------------------------------------------------------------------------------------------------------------------------------------------------------------------------------------------------------------------------------------------------------------------------------------------------------------------------------------------------------------|-----|
| GO:0065007 | biological regulation            | 235/311 | 10343/17046 | 1.60E-08 | 9.80E-06 | 7.81E-06 | CDH3/TSPAN5/CDH13/MBNL2/KCNMB2/TCIRG1/C1D/ZBTB18/DMRT2/CELF2/TBR1/HCST/NPFFR2/ADCY3/PSIP1/B4GALT7/PTH2/CHRNA5/ZBED9/CIDEA/ANKRD9/FRMD6/C15orf27/ZG16B/ZFP42/APCDD1/CTGF/ADRB3/FITM1/TRPV3/ZNF709/ZNF781/CITED4/RNF168/COCH/NLRP6/DNMT3A/DRD4/ECE1/EGFR/EGR3/PATL2/TMEM17/UNC13D/EPHA3/EPHB4/SP8/XRN2/RASA3/PPM1E/VASH1/ACIN1/TBC1D9B/FOXO1/SPG20/FLNB/ATP11A/LARP1/MTOR/GABBR1/TENM4/RGS22/FBXO2/GAPDH5/AMPD2/SDCBP2/DKK3/GLS2/VPS4A/GPR162/GNAS/CRACR2B/GPER1/DOK7/FLVCR1/ZBTB44/GSTP1/GTF2B/BRF1/NME7/GZMA/ANXA2/SERPIND1/KCNIP2/NRG1/ANXA6/HLA-B/HLA-E/HLA-F/HLX/HMGA1/HPCA/APBA2/HOXB3/HOXC5/HOXC6/HOXD3/ACADL/HSP90AA1/HTR5A/COL28A1/FMN1/BARHL2/CYR61/IL6/ISL1/ITIH3/HILS1/ATP9B/LCK/LLGL1/LTB/LTBP1/SMAD3/ME1/MEF2D/MAP3K1/MEOX1/MEOX2/MFI2/MT1A/NEDD9/NFYB/NMBR/NOV/NTF3/PALM/ARHGFE3/LEF1/DDX47/CEND1/ANGPT4/PDE4C/PDE7A/PGAM2/PIK3CG/IL20RB/RIPK4/CYTL1/POMC/PON1/ZDHHC13/ROBO4/BNC2/PPP1CC/PIWIL2/ARHGFE10L/PRMT6/ZNF532/SMPD3/CNOT11/SYBU/LIMS2/VAC14/PRKD1/BIN3/MASP1/PSMB4/TRPC7/LPAR5/ACTR3B/METTL14/CCAR2/PXN/RASGRF2/S100A4/S100A6/CCL17/SFRP2/CXCR5/TRA2B/SGK1/MICAL1/SOX9/STK10/VAMP2/TAF4B/TBP/TCEA1/ACTC1/TIMP3/TLE3/TLR5/TNXB/TRAF1/TRPC4/PHLDA2/TWIST1/VARS/YWHAG/ZNF124/ZNF177/PTP4A1/CACNB2/PAX8/CXCR4/FZD5/TMEM204/NLRX1/ZC3H14/ZNF606/RAB11FIP1/COL18A1/UNC93B1/CAPS/COLQ/SH3BGL3/SCRT1/HIST1H3A/SLA2/PARD6B/IL1F10/SPINK7/KDM2B/LOXL3/MGARP/CBX2/GAS7/FADD/LIMD1/ZFAND2A/LDB2/SMGT1/REEP6/ARHGAP29/LY86/RAB3D/H2AFY/SMAD5-AS1/MTLS/ARHGFE10/ULK2/USP6NL/TELO2/RABGAP1L                                                                                                                                                                                              | 235 |
| GO:0032501 | multicellular organismal process | 165/311 | 6425/17046  | 2.02E-08 | 1.08E-05 | 8.61E-06 | CDH3/CDH13/KCNMB2/ZBTB18/DMRT2/CELF2/TBR1/ADCY3/CHRNA5/CIDEA/ZG16B/SLC38A10/COL11A1/SCLT1/ZFP42/APCDD1/CTGF/ADRB3/TRPV3/RNF168/COCH/NLRP6/DNMT3A/DRD4/ECE1/EGFR/EGR3/EML1/EPHA3/EPHB4/SP8/XRN2/RASA3/VASH1/ACIN1/FOXO1/SPG20/FLNB/MTOR/TENM4/GAPDH5/GJA3/GJB2/AMPD2/SDCBP2/DKK3/VPS4A/GNAS/IZUMO1/GPER1/FLVCR1/GSTP1/NME7/ANXA2/SERPIND1/KCNIP2/NRG1/ANXA6/HLA-B/HLA-E/HLX/HPCA/APBA2/HOXB3/HOXC5/HOXC6/HOXD3/HSD17B2/ACADL/HSP90AA1/HTR5A/FMN1/BARHL2/CYR61/IL6/ISL1/HILS1/ACAT1/INSC/SLC6A17/RESP18/LCK/LLGL1/LOX/LTB/B/SMAD3/MEF2D/MAP3K1/MEOX1/MEOX2/NOV/NTF3/PALM/LEF1/CEND1/ANGPT4/PGAM2/PIK3CG/SPA17/IL20RB/CYTL1/POMC/MOV10L1/ROBO4/BNC2/PPP1CC/PIWIL2/WDTR33/SMPD3/LIMS2/PRKD1/BIN3/PSMB4/TRPC7/METTL14/PXN/RASGRF2/RPL29/S100A4/S100A6/CCL17/SFRP2/CXCR5/TRA2B/SGK1/SOX9/TAF4B/TBP/TCEA1/ACTC1/TIMP3/TLE3/TLR5/TNXB/TRPC4/PHLDA2/TWIST1/YWHAG/PTP4A1/CACNB2/PAX8/CXCR4/FZD5/PPDPF/TMEM204/NLRX1/RAB11FIP1/COL18A1/COLQ/SH3BGL3/SCRT1/HIST1H3A/PARD6B/KDM2B/LOXL3/CBX2/GAS7/FADD/LIMD1/LDB2/RCS1/H2AFY/MTLS/ARHGFE10/ULK2                                                                                                                                                                                                                                                                                                                                                                                                                                                                                                                                                                                                                                                              | 165 |
| GO:0050789 | regulation of biological process | 226/311 | 9837/17046  | 2.42E-08 | 1.15E-05 | 9.18E-06 | CDH3/TSPAN5/CDH13/MBNL2/KCNMB2/TCIRG1/C1D/ZBTB18/DMRT2/CELF2/TBR1/HCST/NPFFR2/ADCY3/PSIP1/B4GALT7/PTH2/CHRNA5/ZBED9/CIDEA/ANKRD9/FRMD6/ZFP42/APCDD1/CTGF/ADRB3/FITM1/TRPV3/ZNF709/ZNF781/CITED4/RNF168/COCH/NLRP6/DNMT3A/DRD4/ECE1/EGFR/EGR3/PATL2/TMEM17/UNC13D/EPHA3/EPHB4/SP8/XRN2/RASA3/PPM1E/VASH1/ACIN1/TBC1D9B/FOXO1/SPG20/FLNB/LARP1/MTOR/GABBR1/TENM4/RGS22/FBXO2/GAPDH5/SDCBP2/DKK3/GLS2/VPS4A/GPR162/GNAS/CRACR2B/GPER1/DOK7/FLVCR1/ZBTB44/GSTP1/GTF2B/BRF1/NME7/GZMA/ANXA2/SERPIND1/KCNIP2/NRG1/ANXA6/HLA-B/HLA-E/HLA-F/HLX/HMGA1/HPCA/APBA2/HOXB3/HOXC5/HOXC6/HOXD3/ACADL/HSP90AA1/HTR5A/COL28A1/FMN1/BARHL2/CYR61/IL6/ISL1/ITIH3/HILS1/LCK/LLGL1/LTB/LTBP1/SMAD3/ME1/MEF2D/MAP3K1/MEOX1/MEOX2/MFI2/MT1A/NEDD9/NFYB/NMBR/NOV/NTF3/PALM/ARHGFE3/LEF1/DDX47/CEND1/ANGPT4/PDE4C/PDE7A/PGAM2/PIK3CG/IL20RB/RIPK4/CYTL1/POMC/PON1/ZDHHC13/ROBO4/BNC2/PPP1CC/PIWIL2/ARHGFE10L/PRMT6/ZNF532/SMPD3/CNOT11/SYBU/LIMS2/VAC14/PRKD1/BIN3/MASP1/PSMB4/LPAR5/ACTR3B/METTL14/CCAR2/PXN/RASGRF2/S100A4/S100A6/CCL17/SFRP2/CXCR5/TRA2B/SGK1/MICAL1/SOX9/STK10/VAMP2/TAF4B/TBP/TCEA1/ACTC1/TIMP3/TLE3/TLR5/TNXB/TRAF1/PHLDA2/TWIST1/VARS/YWHAG/ZNF124/ZNF177/PTP4A1/CACNB2/PAX8/CXCR4/FZD5/TMEM204/NLRX1/ZC3H14/ZNF606/RAB11FIP1/COL18A1/UNC93B1/CAPS/COLQ/SH3BGL3/SCRT1/HIST1H3A/SLA2/PARD6B/IL1F10/SPINK7/KDM2B/LOXL3/MGARP/CBX2/GAS7/FADD/LIMD1/ZFAND2A/LDB2/REEP6/ARHGAP29/LY86/RAB3D/H2AFY/SMAD5-AS1/ARHGFE10/ULK2/USP6NL/TELO2/RABGAP1L                                                                                                                                                                                                                                                       | 226 |
| GO:0044699 | single-organism process          | 267/311 | 12449/17046 | 3.37E-08 | 1.44E-05 | 1.15E-05 | CDH3/TSPAN5/CDH13/KCNMB2/BCKDK/TCIRG1/ABCA9/C1D/ZBTB18/DMRT2/CELF2/TBR1/SEPT9/HCST/NPFFR2/ADCY3/SLC27A2/HIBADH/B4GALT7/PTH2/CHRNA5/CIDEA/CLCA1/ANKRD9/FRMD6/C15orf27/ZG16B/SLC38A10/APOA1BP/COL11A1/GALM/SCLT1/ZFP42/TRPM6/APCDD1/CTGF/CYB561/ADRB3/FITM1/ADAL/TRPV3/WBP2NL/RNF168/COCH/NLRP6/DNAH8/DNMT3A/DRD4/DSG3/ECE1/EGFR/EGR3/TMEM17/EML1/UNC13D/DNAH12/EPHA3/EPHB4/ALAS1/SP8/XRN2/RASA3/PPM1E/VASH1/ACIN1/LIMCH1/FOXO1/SPG20/FLNB/ATP11A/LARP1/MTOR/FUCA1/GABBR1/GAK/TENM4/RGS22/FBXO2/GAPDH5/GJA3/GJB2/AMPD2/SDCBP2/DKK3/GLS2/VPS4A/GPR162/GNAS/CRACR2B/PIGW/IZUMO1/GPER1/FLVCR1/GSTP1/NME7/GZMA/ANXA2/SERPIND1/KCNIP2/NRG1/ANXA6/HLA-B/HLA-E/HLA-F/HLX/HMGA1/HPCA/APBA2/HOXB3/HOXC5/HOXC6/HOXD3/HSD17B2/ACADL/HSP90AA1/HTR5A/COL28A1/FMN1/BARHL2/CYR61/IL6/ISL1/HILS1/ATP9B/ACAT1/KRT15/INSC/TOMM20L/SLC6A17/RESP18/LCK/LLGL1/LOX/LTB/LTBP1/SMAD3/ME1/MEF2D/MAP3K1/MEOX1/MEOX2/MFI2/NUDT1/NEDD9/NFYB/NMBR/NOV/NTF3/PALM/ARHGFE3/LEF1/DDX47/CEND1/ANGPT4/PDE4C/PDE7A/GALNT7/PGAM2/PIGC/PIK3CG/SPA17/PLEC/IL20RB/RIPK4/CYTL1/POMC/PON1/MOV10L1/ZDHHC13/ROBO4/BNC2/LPCAT2/PPP1CC/PIWIL2/ARHGFE10L/PRMT6/WDR33/SMPD3/CNOT11/SYBU/LIMS2/VAC14/PRKD1/BIN3/MASP1/PSMB4/TRPC7/LPAR5/ACTR3B/METTL14/CCAR2/PXN/RASGRF2/EXOC4/RPL8/RPL29/S100A4/S100A6/CCL17/SFRP2/CXCR5/TRA2B/SGK1/MICAL1/CERK/SOX9/STK10/VAMP2/TAF4B/TBP/TCEA1/ACTC1/TIMP3/TLE3/TLR5/TRAPP10/TNXB/TRAF1/TRPC4/PHLDA2/TWIST1/UPP1/VARS/YWHAG/PTP4A1/CACNB2/PAX8/CXCR4/FZD5/PPDPF/GDPD3/TMEM204/NLRX1/EPHX3/RAB11FIP1/COL18A1/UNC93B1/CAPS/COLQ/SH3BGL3/SCRT1/HIST1H3A/SLA2/PARD6B/IL1F10/KDM2B/LOXL3/MGARP/CBX2/GAS7/FADD/LIMD1/MAP7/LDB2/SMGT1/RCS1/SDR42E1/ARHGAP29/LY86/RAB3D/H2AFY/SMAD5-AS1/MTLS/ARHGFE10/ULK2/USP6NL/TELO2 | 267 |

|            |                                           |         |             |          |          |          |                                                                                                                                                                                                                                                                                                                                                                                                                                                                                                                                                                                                                                                                                                                                                                                                                                                                                                                                                                                                                                                                                                                                                                                                                                                                                                                                                                                                                                                                                                                                                                                                                                                                                                                                                                                                                     |     |
|------------|-------------------------------------------|---------|-------------|----------|----------|----------|---------------------------------------------------------------------------------------------------------------------------------------------------------------------------------------------------------------------------------------------------------------------------------------------------------------------------------------------------------------------------------------------------------------------------------------------------------------------------------------------------------------------------------------------------------------------------------------------------------------------------------------------------------------------------------------------------------------------------------------------------------------------------------------------------------------------------------------------------------------------------------------------------------------------------------------------------------------------------------------------------------------------------------------------------------------------------------------------------------------------------------------------------------------------------------------------------------------------------------------------------------------------------------------------------------------------------------------------------------------------------------------------------------------------------------------------------------------------------------------------------------------------------------------------------------------------------------------------------------------------------------------------------------------------------------------------------------------------------------------------------------------------------------------------------------------------|-----|
| GO:0009987 | cellular process                          | 285/311 | 13765/17046 | 6.00E-08 | 2.34E-05 | 1.86E-05 | CDH3/TSPAN5/CDH13/MBNL2/KCNMB2/BCKDK/TCIRG1/ABCA9/C1D/ZBTB18/DMRT2/CELF2/TBR1/SEPT9/HCST/NPFFR2/ADCY3/SLC27A2/HIBADH/PSIP1/B4GALT7/PTH2/ADPRHL1/CHRNA5/ZBED9/CIDEA/ALPK2/CLCA1/ANKRD9/FRMD6/C15orf21/SLC38A10/APOA1BP/COL11A1/SCLT1/ZFP42/TRPM6/APCDD1/CTGF/CYB561/ADRB3/FITM1/ADAL/TRPV3/ZNF709/ZNF781/CITED4/WBP2NL/RNF168/COCH/NLRP6/DNAH8/DNMT3A/DRD4/DSG3/ECE1/EGFR/EGR3/PATL2/TMEM17/EML1/UNC13D/DNAH12/EPHA3/EPHB4/ALAS1/RNF182/S/P8/XRN2/RASA3/PPM1E/VASH1/ACIN1/LIMCH1/FOXO1/SPG20/FLNB/ATP11A/LARP1/MTOR/GABBR1/GAK/TENM4/LTN1/RGS22/FBXO2/GAPDHS/GJA3/GJB2/AMPD2/SDCBP2/DK3/GLS2/VPS4A/GPR162/GNAS/PIGW/IZUMO1/GPER1/DOK7/FLVCR1/ZBTB44/GSTP1/GTF2B/BRF1/NME7/GZMA/ANXA2/SERPIND1/KCNIP2/NRG1/ANXA6/HLA-B/HLA-E/HLA-F/HLX/HMGA1/HPCA/APBA2/HOXB3/HOXC5/HOXC6/HOXD3/ACADL/HSP90AA1/HTR5A/COL28A1/FMN1/BARHL2/CYR61/IL6/ISL1/ITIH3/HILS1/ATP9B/ACAT1/KRT7/KRT15/INSC/S/LC6A17/LCK/LLGL1/LOX/LTB/LTBP1/SMAD3/ME1/MEF2D/MAP3K1/MEOX1/MEOX2/MFI2/MT1A/NUDT1/NEDD9/NFYB/NMBR/NOV/NTF3/PALM/ARHGFE3/LEF1/DDX47/CEND1/ANGPT4/PDE4C/PDE7A/GALNT7/PGAM2/PIGC/PIK3CG/SPA17/PLEC/IL20RB/RIPK4/CYTL1/POMC/PON1/MOV10L1/ZDHC13/ROBO4/BNC2/LPCAT2/PPP1CC/PIWIL2/ARHGFE10L/PRMT6/ZNF532/WDR33/SMPD3/CNOT11/SYBU/LIMS2/VAC14/PRKD1/BIN3/MASP1/PSMB4/TRPC7/LPAR5/ACTR3B/METTL14/CCAR2/PXN/RASGRF2/EXOC4/RPL8/RPL29/S100A4/S100A6/CCL17/SFRP2/CXCR5/TRA2B/SGK1/MICAL1/CERK/SOX9/STK10/VAMP2/TAFA4B/TBP/TCEA1/ACTC1/TIMP3/TLE3/TLR5/TRAPP10/TNXB/TRA1/TRPC4/PHLDA2/TWIST1/UPP1/VARS/YWHAG/ZNF124/ZNF177/PTP4A1/CACNB2/PAX8/CXCR4/FZD5/PPDPF/TMEM204/NLRX1/EPHX3/ZC3H14/ZNF606/RAB11FIP1/COL18A1/UNC93B1/CAPS/COLQ/HIST1H2BM/SH3BGLR3/SCRT1/HIST1H3A/SLA2/PARD6B/IL1F10/SPINK7/KDM2B/LOXL3/MGARP/CBX2/GAS7/FADD/LIMD1/MAP7/ZFAND2A/LDB2/SMDT1/RCSd1/REEP6/ARHGAP29/LY86/RAB3D/H2AFY/SMAD5-AS1/MTL5/ARHGFE10/ULK2/USP6NL/TELO2 | 285 |
| GO:0050794 | regulation of cellular process            | 216/311 | 9347/17046  | 7.37E-08 | 2.63E-05 | 2.10E-05 | CDH3/TSPAN5/CDH13/MBNL2/TCIRG1/C1D/ZBTB18/DMRT2/TBR1/HCST/NPFFR2/ADCY3/PSIP1/B4GALT7/PTH2/CHRNA5/ZBED9/CIDEA/ANKRD9/FRMD6/ZFP42/APCDD1/CTGF/ADRB3/TRPV3/ZNF709/ZNF781/CITED4/RNF168/COCH/NLRP6/DNMT3A/DRD4/ECE1/EGFR/EGR3/PATL2/TMEM17/UNC13D/EPHA3/EPHB4/SP8/XRN2/RASA3/PPM1E/VASH1/ACIN1/FOXO1/SPG20/FLNB/LARP1/MTOR/GABBR1/TENM4/RGS22/FBXO2/GAPDHS/SDCBP2/DKK3/GLS2/VPS4A/GPR162/GNAS/GPER1/DOK7/ZBTB44/GSTP1/GTF2B/BRF1/NME7/GZMA/ANXA2/SERPIND1/KCNIP2/NRG1/ANXA6/HLA-B/HLA-E/HLA-F/HLX/HMGA1/HPCA/HOXB3/HOXC5/HOXC6/HOXD3/ACADL/HSP90AA1/HTR5A/COL28A1/FMN1/BARHL2/CYR61/IL6/ISL1/ITIH3/HILS1/LCK/LLGL1/LTB/LTBP1/SMAD3/ME1/MEF2D/H/MAP3K1/MEOX1/MEOX2/MFI2/NEDD9/NFYB/NMBR/NOV/NTF3/PALM/ARHGFE3/LEF1/DDX47/CEND1/ANGPT4/PDE4C/PDE7A/PGAM2/PIK3CG/IL20RB/RIPK4/CYTL1/POMC/ZDHC13/ROBO4/BNC2/PPP1CC/PIWIL2/ARHGFE10L/PRMT6/ZNF532/SMPD3/CNOT11/SYBU/LIMS2/VAC14/PRKD1/BIN3/MASP1/PSMB4/LPAR5/ACTR3B/METTL14/CCAR2/PXN/RASGRF2/S100A4/S100A6/CCL17/SFRP2/CXCR5/TRA2B/SGK1/MICAL1/SOX9/STK10/VAMP2/TAFA4B/TBP/TCEA1/ACTC1/TIMP3/TLE3/TLR5/TNXB/TRA1/PHLDA2/TWIST1/VARS/YWHAG/ZNF124/ZNF177/PTP4A1/CACNB2/PAX8/CXCR4/FZD5/TMEM204/NLRX1/ZC3H14/ZNF606/RAB11FIP1/COL18A1/UNC93B1/CAPS/COLQ/SH3BGLR3/SCRT1/HIST1H3A/SLA2/PARD6B/IL1F10/SPINK7/KDM2B/LOXL3/MGARP/CBX2/GAS7/FADD/LIMD1/ZFAND2A/LDB2/REEP6/ARHGAP29/LY86/RAB3D/H2AFY/SMAD5-AS1/ARHGFE10/ULK2/USP6NL/TELO2                                                                                                                                                                                                                                                                                                                                                                                                                                            | 216 |
| GO:0044707 | single-multicellular organism process     | 158/311 | 6214/17046  | 1.30E-07 | 4.29E-05 | 3.42E-05 | CDH3/CDH13/KCNMB2/ZBTB18/DMRT2/CELF2/TBR1/ADCY3/CHRNA5/CIDEA/ZG16B/SLC38A10/COL11A1/SCLT1/ZFP42/APCDD1/CTGF/ADRB3/TRPV3/RNF168/COCH/NLRP6/DNMT3A/DRD4/ECE1/EGFR/EGR3/EML1/EPHA3/EPHB4/SP8/RASA3/VASH1/ACIN1/FOXO1/SPG20/FLNB/MTOR/TENM4/GJA3/GJB2/AMPD2/SDCBP2/DKK3/VPS4A/GNAS/GPER1/FLVCR1/GSTP1/NME7/ANXA2/SERPIND1/KCNIP2/NRG1/ANXA6/HLA-B/HLA-E/HLX/HPCA/APBA2/HOXB3/HOXC5/HOXC6/HOXD3/HSD17B2/ACADL/HSP90AA1/HTR5A/FMN1/BARHL2/CYR61/IL6/ISL1/HILS1/ACAT1/INSC/SLC6A17/RESP18/LCK/LLGL1/LOX/LTB/SMAD3/MEF2D/MAP3K1/MEOX1/MEOX2/NOV/NTF3/PALM/LEF1/CEND1/ANGPT4/PGAM2/PIK3CG/IL20RB/CYTL1/POMC/MOV10L1/ROBO4/BNC2/PPP1CC/PIWIL2/SMPD3/LIMS2/PRKD1/BIN3/PSMB4/TRPC7/METTL14/PXN/RASGRF2/RPL29/S100A4/S100A6/CCL17/SFRP2/CXCR5/TRA2B/SGK1/SOX9/TCEA1/ACTC1/TIMP3/TLE3/TLR5/TNXB/TRPC4/PHLDA2/TWIST1/YWHAG/PTP4A1/CACNB2/PAX8/CXCR4/FZD5/PPDPF/TMEM204/NLRX1/RAB11FIP1/COL18A1/COLQ/SH3BGLR3/SCRT1/HIST1H3A/PARD6B/KDM2B/LOXL3/CBX2/GAS7/FADD/LIMD1/LDB2/RCSd1/H2AFY/MTL5/ARHGFE10/ULK2                                                                                                                                                                                                                                                                                                                                                                                                                                                                                                                                                                                                                                                                                                                                                                                                                            | 158 |
| GO:0048468 | cell development                          | 67/311  | 1998/17046  | 4.85E-07 | 0.00015  | 0.00012  | ZBTB18/TBR1/FRMD6/COL11A1/SCLT1/ZFP42/EGFR/UNC13D/EPHA3/EPHB4/RASA3/SPG20/FLNB/MTOR/TENM4/GAPDHS/GPER1/FLVCR1/ANXA2/KCNIP2/NRG1/HOXB3/HOXD3/HSP90AA1/FMN1/BARHL2/CYR61/IL6/ISL1/HILS1/LLGL1/SMAD3/MAP3K1/MFI2/NTF3/PALM/LEF1/MOV10L1/PIWIL2/PRKD1/BIN3/PSMB4/TRPC7/PXN/RASGRF2/S100A4/S100A6/SFRP2/SGK1/SOX9/TAFA4B/ACTC1/TRPC4/TWIST1/YWHAG/CACNB2/PAX8/CXCR4/FZD5/COL18A1/SCRT1/PARD6B/LOXL3/GAS7/LIMD1/ARHGFE10/ULK2                                                                                                                                                                                                                                                                                                                                                                                                                                                                                                                                                                                                                                                                                                                                                                                                                                                                                                                                                                                                                                                                                                                                                                                                                                                                                                                                                                                             | 67  |
| GO:0009653 | anatomical structure morphogenesis        | 80/311  | 2579/17046  | 6.92E-07 | 0.0002   | 0.00016  | CDH13/DMRT2/TBR1/FRMD6/COL11A1/SCLT1/CTGF/COCH/ECE1/EGFR/EGR3/TMEM17/UNC13D/EPHA3/EPHB4/SP8/RASA3/VASH1/FOXO1/SPG20/FLNB/TENM4/DKK3/GNAS/FLVCR1/ANXA2/NRG1/HLX/HOXB3/HOXD3/HSP90AA1/FMN1/BARHL2/CYR61/IL6/ISL1/LLGL1/SMAD3/MEF2D/MAP3K1/MEOX1/MEOX2/MFI2/NOV/NTF3/PALM/LEF1/CEND1/ANGPT4/PIK3CG/RIPK4/ROBO4/BNC2/LIMS2/PRKD1/BIN3/PSMB4/TRPC7/PXN/RASGRF2/S100A4/S100A6/SFRP2/SGK1/SOX9/ACTC1/TLE3/TRPC4/PHLDA2/TWIST1/CACNB2/PAX8/FZD5/COL18A1/PARD6B/KDM2B/LOXL3/GAS7/LIMD1/ULK2                                                                                                                                                                                                                                                                                                                                                                                                                                                                                                                                                                                                                                                                                                                                                                                                                                                                                                                                                                                                                                                                                                                                                                                                                                                                                                                                  | 80  |
| GO:0048518 | positive regulation of biological process | 130/311 | 4960/17046  | 9.63E-07 | 0.00026  | 0.00021  | CDH3/TSPAN5/CDH13/TCIRG1/DMRT2/TBR1/HCST/ADCY3/PSIP1/CIDEA/CTGF/ADRB3/FITM1/TRPV3/CITED4/RNF168/COCH/NLRP6/DNMT3A/DRD4/ECE1/EGFR/EGR3/UNC13D/EPHA3/RASA3/PPM1E/ACIN1/TBC1D9B/FOXO1/LARP1/MTOR/TENM4/RGS22/GAPDHS/GLS2/VPS4A/GNAS/GPER1/DOK7/GSTP1/BRF1/GZMA/ANXA2/NRG1/HLA-B/HLA-E/HLX/HMGA1/HPCA/HOXB3/HSP90AA1/FMN1/BARHL2/CYR61/IL6/ISL1/LCK/LLGL1/LTB/SMAD3/MEF2D/MAP3K1/MEOX1/MEOX2/MFI2/NFYB/NOV/NTF3/PALM/ARHGFE3/LEF1/ANGPT4/PIK3CG/IL20RB/RIPK4/CYTL1/POMC/PON1/ZDHC13/PIWIL2/ARHGFE10L/SMPD3/LIMS2/PRKD1/MASP1/PSMB4/ACTR3B/CCAR2/PXN/RASGRF2/S100A4/S100A6/CCL17/SFRP2/CXCR5/TRA2B/SGK1/SOX9/STK10/VAMP2/TBP/TCEA1/ACTC1/TLR5/TRA1/TWIST1/YWHAG/PTP4A1/CACNB2/PAX8/CXCR4/FZD5/NLRX1/COL18A1/UNC93B1/SH3BGLR3/S/LA2/MGARP/FADD/LIMD1/ZFAND2A/LDB2/ARHGAP29/LY86/RAB3D/H2AFY/ARHGFE10/USP6NL/RABGAP11                                                                                                                                                                                                                                                                                                                                                                                                                                                                                                                                                                                                                                                                                                                                                                                                                                                                                                                                                                                                      | 130 |

|            |                                                |         |            |          |         |         |                                                                                                                                                                                                                                                                                                                                                                                                                                                                                                                                                                                                                                                                                                                                                                                                                                                                                                                                                         |     |
|------------|------------------------------------------------|---------|------------|----------|---------|---------|---------------------------------------------------------------------------------------------------------------------------------------------------------------------------------------------------------------------------------------------------------------------------------------------------------------------------------------------------------------------------------------------------------------------------------------------------------------------------------------------------------------------------------------------------------------------------------------------------------------------------------------------------------------------------------------------------------------------------------------------------------------------------------------------------------------------------------------------------------------------------------------------------------------------------------------------------------|-----|
| GO:0019222 | regulation of metabolic process                | 152/311 | 6084/17046 | 1.03E-06 | 0.00026 | 0.00021 | CDH3/CDH13/MBNL2/C1D/ZBTB18/DMRT2/TBR1/NPFFR2/ADCY3/PSIP1/ZBED9/CIDEA/ZFP42/CTGF/ADRB3/ZNF709/ZNF781/CITED4/RNF168/NLRP6/DNMT3A/DRD4/ECE1/EGFR/EGR3/PATL2/EPHA3/SP8/XRN2/RASA3/PPM1E/ACIN1/TBC1D9B/FOXO1/SPG20/LARP1/MTOR/GABBR1/RGS22/FBXO2/GAPDH5/DKK3/GNAS/GPER1/DOK7/ZBTB44/GSTP1/GTF2B/BRF1/GZMA/ANXA2/SERPIND1/NRG1/HLX/HMGA1/HPCA/APBA2/HOXB3/HOXC5/HOXC6/HOXD3/ACADL/HSP90AA1/COL28A1/BARHL2/CYR61/IL6/ISL1/ITIH3/HILS1/LCK/LLGL1/LTB/SMAD3/ME1/MEF2D/MAP3K1/MEOX1/MEOX2/MFI2/NFYB/NOV/NTF3/PALM/ARHGFEF3/LEF1/ANGPT4/PGAM2/PIK3CG/RIPK4/CYTL1/POMC/BNC2/PPP1CC/PIWIL2/ARHGFEF10L/PRMT6/ZNF532/CNOT11/VAC14/PRKD1/MASP1/PSMB4/METTL14/CCAR2/PXN/RASGRF2/CCL17/SFRP2/TRA2B/SGK1/SOX9/STK10/TAF4B/TBP/TCEA1/ACTC1/TIMP3/TLE3/TLR5/TNXB/TRAFA1/PHLDA2/TWIST1/VARS/YWHAG/ZNF124/ZNF177/PAX8/CXCR4/FZD5/ZC3H14/ZNF606/SH3BGL3/SCRT1/HIST1H3A/SLA2/SPINK7/KDM2B/LOXL3/CBX2/GAS7/FADD/LIMD1/ZFAND2A/LDB2/ARHGAP29/H2AFY/ARHGFEF10/ULK2/USP6NL/RABGAP1L | 152 |
| GO:0031323 | regulation of cellular metabolic process       | 137/311 | 5352/17046 | 1.54E-06 | 0.00037 | 0.00029 | CDH3/CDH13/MBNL2/C1D/ZBTB18/DMRT2/TBR1/NPFFR2/ADCY3/PSIP1/ZBED9/CIDEA/ZFP42/CTGF/ADRB3/ZNF709/ZNF781/CITED4/RNF168/NLRP6/DNMT3A/DRD4/ECE1/EGFR/EGR3/PATL2/SP8/XRN2/RASA3/PPM1E/ACIN1/FOXO1/SPG20/LARP1/MTOR/GABBR1/FBXO2/GAPDH5/DKK3/GNAS/GPER1/DOK7/ZBTB44/GSTP1/GTF2B/BRF1/GZMA/ANXA2/SERPIND1/NRG1/HLX/HMGA1/HPCA/HOXB3/HOXC5/HOXC6/HOXD3/ACADL/HSP90AA1/COL28A1/BARHL2/CYR61/IL6/ISL1/ITIH3/HILS1/LCK/LTB/SMAD3/ME1/MEF2D/MAP3K1/MEOX1/MEOX2/MFI2/NFYB/NTF3/PALM/LEF1/ANGPT4/PGAM2/PIK3CG/RIPK4/CYTL1/POMC/BNC2/PIWIL2/PRMT6/ZNF532/CNOT11/VAC14/PRKD1/MASP1/PSMB4/METTL14/CCAR2/PXN/RASGRF2/CCL17/SFRP2/TRA2B/SGK1/SOX9/STK10/TAF4B/TBP/TCEA1/TIMP3/TLE3/TLR5/TNXB/TRAFA1/PHLDA2/TWIST1/VARS/YWHAG/ZNF124/ZNF177/PAX8/CXCR4/FZD5/ZC3H14/ZNF606/SCRT1/HIST1H3A/SLA2/SPINK7/KDM2B/LOXL3/CBX2/GAS7/FADD/LIMD1/ZFAND2A/LDB2/H2AFY/ULK2                                                                                                                 | 137 |
| GO:0006928 | movement of cell or subcellular component      | 60/311  | 1789/17046 | 2.23E-06 | 0.0005  | 0.0004  | CDH13/TBR1/ADCY3/FRMD6/APCDD1/CTGF/DNAH8/EGFR/EGR3/DNAH12/EPHA3/EPHB4/RASA3/VASH1/GAPDH5/GPER1/NME7/NRG1/HSP90AA1/BARHL2/CYR61/IL6/ISL1/LCK/S/SMAD3/MAP3K1/NOV/NTF3/PALM/LEF1/CEND1/ANGPT4/PIK3CG/SPA17/ROBO4/PRKD1/BIN3/PSMB4/TRPC7/RASGRF2/CCL17/SFRP2/CXCR5/SGK1/SOX9/STK10/ACTC1/TRPC4/PHLDA2/TWIST1/PTP4A1/CACNB2/CXCR4/COL18A1/SH3BGL3/SCRT1/PARD6B/MGARF/FADD/LIMD1                                                                                                                                                                                                                                                                                                                                                                                                                                                                                                                                                                              | 60  |
| GO:0030154 | cell differentiation                           | 97/311  | 3469/17046 | 3.55E-06 | 0.00076 | 0.00061 | CDH3/ZBTB18/TBR1/FRMD6/COL11A1/SCLT1/ZFP42/APCDD1/CTGF/ADRB3/DNMT3A/EGFR/EGR3/EML1/UNC13D/EPHA3/EPHB4/RASA3/ACIN1/FOXO1/SPG20/FLNB/MTOR/TENM4/GAPDH5/GNAS/GPER1/FLVCR1/ANXA2/KCNIP2/NRG1/HLA-B/HLX/HOXB3/HOXD3/HSP90AA1/FMN1/BARHL2/CYR61/IL6/ISL1/HILS1/INSC/LCK/LLGL1/SMAD3/MEF2D/MAP3K1/MEOX1/MFI2/NOV/NTF3/PALM/LEF1/CEND1/CYTL1/MOV10L1/ROBO4/PPP1CC/PIWIL2/SMPD3/PRKD1/BIN3/PSMB4/TRPC7/PXN/RASGRF2/S100A4/S100A6/CCL17/SFRP2/SGK1/SOX9/TAF4B/TCEA1/ACTC1/TRPC4/TWIST1/YWHAG/CACNB2/PAX8/CXCR4/FZD5/PPDPF/TMEM204/COL18A1/SCRT1/PARD6B/LOXL3/CBX2/GAS7/FADD/LIMD1/H2AFY/MTLS/ARHGFEF10/ULK2                                                                                                                                                                                                                                                                                                                                                       | 97  |
| GO:0048870 | cell motility                                  | 44/311  | 1187/17046 | 5.41E-06 | 0.00105 | 0.00084 | CDH13/ADCY3/APCDD1/CTGF/DNAH8/EGFR/EGR3/EPHA3/EPHB4/VASH1/GAPDH5/GPER1/NRG1/BARHL2/CYR61/IL6/ISL1/LCK/SMAD3/MAP3K1/NOV/NTF3/LEF1/CEND1/ANGPT4/PIK3CG/ROBO4/PRKD1/BIN3/CCL17/SFRP2/SGK1/SOX9/STK10/PHLDA2/TWIST1/PTP4A1/CXCR4/COL18A1/SH3BGL3/SCRT1/PARD6B/FADD/LIMD1                                                                                                                                                                                                                                                                                                                                                                                                                                                                                                                                                                                                                                                                                    | 44  |
| GO:0051674 | localization of cell                           | 44/311  | 1187/17046 | 5.41E-06 | 0.00105 | 0.00084 | CDH13/ADCY3/APCDD1/CTGF/DNAH8/EGFR/EGR3/EPHA3/EPHB4/VASH1/GAPDH5/GPER1/NRG1/BARHL2/CYR61/IL6/ISL1/LCK/SMAD3/MAP3K1/NOV/NTF3/LEF1/CEND1/ANGPT4/PIK3CG/ROBO4/PRKD1/BIN3/CCL17/SFRP2/SGK1/SOX9/STK10/PHLDA2/TWIST1/PTP4A1/CXCR4/COL18A1/SH3BGL3/SCRT1/PARD6B/FADD/LIMD1                                                                                                                                                                                                                                                                                                                                                                                                                                                                                                                                                                                                                                                                                    | 44  |
| GO:0080090 | regulation of primary metabolic process        | 133/311 | 5271/17046 | 5.85E-06 | 0.00109 | 0.00087 | CDH13/MBNL2/C1D/ZBTB18/DMRT2/TBR1/NPFFR2/ADCY3/PSIP1/ZBED9/CIDEA/ZFP42/CTGF/ADRB3/ZNF709/ZNF781/CITED4/RNF168/NLRP6/DNMT3A/DRD4/ECE1/EGFR/EGR3/PATL2/SP8/XRN2/RASA3/PPM1E/ACIN1/FOXO1/SPG20/LARP1/MTOR/GABBR1/FBXO2/GAPDH5/DKK3/GNAS/GPER1/DOK7/ZBTB44/GSTP1/GTF2B/BRF1/GZMA/ANXA2/SERPIND1/NRG1/HLX/HMGA1/HPCA/HOXB3/HOXC5/HOXC6/HOXD3/ACADL/COL28A1/BARHL2/CYR61/IL6/ISL1/ITIH3/HILS1/LCK/LTB/SMAD3/ME1/MEF2D/MAP3K1/MEOX1/MEOX2/MFI2/NFYB/NTF3/PALM/LEF1/ANGPT4/PGAM2/PIK3CG/RIPK4/CYTL1/POMC/BNC2/PIWIL2/PRMT6/ZNF532/CNOT11/VAC14/PRKD1/MASP1/PSMB4/METTL14/CCAR2/PXN/RASGRF2/CCL17/SFRP2/TRA2B/SGK1/SOX9/STK10/TAF4B/TBP/TCEA1/TIMP3/TLE3/TNXB/TRAFA1/PHLDA2/TWIST1/VARS/YWHAG/ZNF124/ZNF177/PAX8/CXCR4/FZD5/ZC3H14/ZNF606/SCRT1/HIST1H3A/SLA2/SPINK7/KDM2B/LOXL3/CBX2/GAS7/FADD/LIMD1/ZFAND2A/LDB2/H2AFY                                                                                                                                         | 133 |
| GO:0060255 | regulation of macromolecule metabolic process  | 132/311 | 5249/17046 | 7.92E-06 | 0.0014  | 0.00112 | CDH3/CDH13/MBNL2/C1D/ZBTB18/DMRT2/TBR1/NPFFR2/ADCY3/PSIP1/ZBED9/CIDEA/ZFP42/CTGF/ADRB3/ZNF709/ZNF781/CITED4/RNF168/NLRP6/DNMT3A/DRD4/ECE1/EGFR/EGR3/PATL2/SP8/XRN2/RASA3/PPM1E/ACIN1/FOXO1/SPG20/LARP1/MTOR/FBXO2/GAPDH5/DKK3/GNAS/GPER1/DOK7/ZBTB44/GSTP1/GTF2B/BRF1/GZMA/ANXA2/SERPIND1/NRG1/HLX/HMGA1/APBA2/HOXB3/HOXC5/HOXC6/HOXD3/COL28A1/BARHL2/CYR61/IL6/ISL1/ITIH3/HILS1/LCK/LTB/SMAD3/MEF2D/MAP3K1/MEOX1/MEOX2/MFI2/NFYB/NOV/NTF3/LEF1/ANGPT4/PGAM2/PIK3CG/RIPK4/CYTL1/POMC/BNC2/PPP1CC/PIWIL2/PRMT6/ZNF532/CNOT11/PRKD1/MASP1/PSMB4/METTL14/CCAR2/PXN/RASGRF2/CCL17/SFRP2/TRA2B/SGK1/SOX9/STK10/TAF4B/TBP/TCEA1/ACTC1/TIMP3/TLE3/TNXB/TRAFA1/PHLDA2/TWIST1/VARS/YWHAG/ZNF124/ZNF177/PAX8/CXCR4/FZD5/ZC3H14/ZNF606/SCRT1/HIST1H3A/SLA2/SPINK7/KDM2B/LOXL3/CBX2/GAS7/FADD/LIMD1/ZFAND2A/LDB2/H2AFY                                                                                                                                              | 132 |
| GO:0051239 | regulation of multicellular organismal process | 70/311  | 2298/17046 | 8.18E-06 | 0.0014  | 0.00112 | CDH3/KCNMB2/DMRT2/CELF2/TBR1/CIDEA/CTGF/ADRB3/TRPV3/NLRP6/DRD4/ECE1/EGFR/EPHA3/VASH1/ACIN1/FOXO1/SPG20/MTOR/TENM4/GNAS/GPER1/FLVCR1/GSTP1/ANXA2/KCNIP2/NRG1/ANXA6/HLA-B/HLA-E/HLX/HOXB3/HOXD3/BARHL2/CYR61/IL6/ISL1/LCK/LTB/SMAD3/NOV/NTF3/PALM/LEF1/CEND1/ANGPT4/PIK3CG/IL20RB/POMC/LIMS2/PRKD1/SFRP2/SGK1/SOX9/TLR5/PHLDA2/TWIST1/YWHAG/PAX8/CXCR4/FZD5/NLRX1/RAB11FIP1/COLQ/SH3BGL3/SCRT1/FADD/LIMD1/H2AFY/ULK2                                                                                                                                                                                                                                                                                                                                                                                                                                                                                                                                      | 70  |
| GO:0016477 | cell migration                                 | 41/311  | 1095/17046 | 9.25E-06 | 0.00152 | 0.00122 | CDH13/APCDD1/CTGF/EGFR/EGR3/EPHA3/EPHB4/VASH1/GPER1/NRG1/BARHL2/CYR61/IL6/ISL1/LCK/SMAD3/MAP3K1/NOV/NTF3/LEF1/CEND1/ANGPT4/PIK3CG/ROBO4/PRKD1/BIN3/CCL17/SFRP2/SGK1/SOX9/STK10/PHLDA2/TWIST1/PTP4A1/CXCR4/COL18A1/SH3BGL3/SCRT1/PARD6B/FADD/LIMD1                                                                                                                                                                                                                                                                                                                                                                                                                                                                                                                                                                                                                                                                                                       | 41  |

|            |                                                   |         |             |          |         |         |                                                                                                                                                                                                                                                                                                                                                                                                                                                                                                                                                                                                                                                                                                                                                                                                                                                                                                                                                                                                                                                                                                                                                                                                                                                                                                                                                                                                                                                                                                                                     |     |
|------------|---------------------------------------------------|---------|-------------|----------|---------|---------|-------------------------------------------------------------------------------------------------------------------------------------------------------------------------------------------------------------------------------------------------------------------------------------------------------------------------------------------------------------------------------------------------------------------------------------------------------------------------------------------------------------------------------------------------------------------------------------------------------------------------------------------------------------------------------------------------------------------------------------------------------------------------------------------------------------------------------------------------------------------------------------------------------------------------------------------------------------------------------------------------------------------------------------------------------------------------------------------------------------------------------------------------------------------------------------------------------------------------------------------------------------------------------------------------------------------------------------------------------------------------------------------------------------------------------------------------------------------------------------------------------------------------------------|-----|
| GO:0044763 | single-organism cellular process                  | 241/311 | 11314/17046 | 1.03E-05 | 0.00163 | 0.0013  | CDH3/TSPAN5/CDH13/KCNMB2/BCKDK/TCIRG1/ABCA9/C1D/ZBTB18/TBR1/SEPT9/HCST/NPFFR2/ADCY3/SLC27A2/HIBADH/B4GALT7/PTH2/CHRNA5/CIDEA/CLCA1/ANKRD9/FRM D6/C15orf27/SLC38A10/APOA1BP/COL11A1/SCLT1/ZFP42/TRPM6/APCDD1/CTGF/CYB561/ADRB3/FITM1/ADAL/TRPV3/WBP2NL/RNF168/COCH/NLRP6/DNAH8/DNMT3A/DRD4/D SG3/EGFR/EGR3/TMEM17/EML1/UNC13D/DNAH12/EPHA3/EPHB4/ALAS1/XRN2/RASA3/PPM1E/VASH1/ACIN1/LIMCH1/FOXO1/SPG20/FLNB/ATP11A/LARP1/MTOR/GABBR1/GAK /TENM4/RGS22/FBXO2/GAPDHS/GJA3/GJB2/AMPD2/SDCBP2/DKK3/GLS2/VPS4A/GPR162/GNAS/PIGW/IZUMO1/GPER1/FLVCR1/GSTP1/NME7/GZMA/ANXA2/KCNIP2/NRG1/ANX A6/HLA-B/HLA-E/HLA-F/HLX/HMGA1/HPCA/APBA2/HOXB3/HOXD3/ACADL/HSP90AA1/HTR5A/COL28A1/FMN1/BARHL2/CYR61/IL6/ISL1/HLS1/ATP9B/ACAT1/KRT15/INSC/SLC6A17/LCK/LLGL1/LOX/LTB /LTBP1/SMAD3/ME1/MEF2D/MAP3K1/MEOX1/MEOX2/MF2/NUDT1/NEDD9/NMBR/NOV/NTF3/PALM/ARHGFE3/LEF1/DDX47/CEND1/ANGPT4/PDE4C/PDE7A/GALNT7/PGAM2/P IGC/PIK3CG/SPA17/PLEC/IL20RB/CYTL1/POMC/PON1/MOV10L1/ZDHHC13/ROBO4/LPCAT2/PPP1CC/PIWIL2/ARHGFE10L/PRMT6/WDR33/SMPD3/CNOT11/SYBU/LIMS2/VAC14/PR KD1/BIN3/PSMB4/TRPC7/LPAR5/ACTR3B/CCAR2/PXN/RASGRF2/EXOC4/RPL8/RPL29/S100A4/S100A6/CCL17/SFRP2/CXCR5/SGK1/MICAL1/CERK/SOX9/STK10/VAMP2/TAF4B/TBP/ TCEA1/ACTC1/TLE3/TLR5/TRAPP3/TNXB/TRA1/TRAFC4/PHLDA2/TWIST1/UPP1/VARS/YWHAG/PTP4A1/CACNB2/PAX8/CXCR4/FZD5/PPDPF/TMEM204/NLRX1/EPHX3/RAB11FIP 1/COL18A1/UNC93B1/CAPS/COLQ/SH3BGL3/SCRT1/HIST1H3A/SLA2/PARD6B/IL1F10/KDM2B/LOXL3/MGARP/CBX2/GAS7/FADD/LIMD1/MAP7/SMDT1/ARHGAP29/LY86/RAB3D/ H2AFY/SMAD5-AS1/MTL5/ARHGFE10/ULK2/TELO2 | 241 |
| GO:0001525 | angiogenesis                                      | 21/311  | 398/17046   | 1.43E-05 | 0.00218 | 0.00174 | CDH13/CTGF/EGR3/EPHB4/VASH1/ANXA2/HOXB3/CYR61/IL6/ISL1/MEOX2/NOV/LEF1/ANGPT4/PIK3CG/ROBO4/PRKD1/SFRP2/TWIST1/FZD5/COL18A1                                                                                                                                                                                                                                                                                                                                                                                                                                                                                                                                                                                                                                                                                                                                                                                                                                                                                                                                                                                                                                                                                                                                                                                                                                                                                                                                                                                                           | 21  |
| GO:0072358 | cardiovascular system development                 | 34/311  | 861/17046   | 1.96E-05 | 0.0028  | 0.00223 | CDH13/COL11A1/CTGF/ECE1/EGR3/EPHB4/VASH1/FOXO1/MTOR/TENM4/FLVCR1/ANXA2/NRG1/HOXB3/CYR61/IL6/ISL1/LOX/SMAD3/MEF2D/MEOX2/NOV/LEF1/ANGPT4/PIK3C G/ROBO4/PRKD1/SFRP2/SOX9/ACTC1/TWIST1/FZD5/TMEM204/COL18A1                                                                                                                                                                                                                                                                                                                                                                                                                                                                                                                                                                                                                                                                                                                                                                                                                                                                                                                                                                                                                                                                                                                                                                                                                                                                                                                             | 34  |
| GO:0072359 | circulatory system development                    | 34/311  | 861/17046   | 1.96E-05 | 0.0028  | 0.00223 | CDH13/COL11A1/CTGF/ECE1/EGR3/EPHB4/VASH1/FOXO1/MTOR/TENM4/FLVCR1/ANXA2/NRG1/HOXB3/CYR61/IL6/ISL1/LOX/SMAD3/MEF2D/MEOX2/NOV/LEF1/ANGPT4/PIK3C G/ROBO4/PRKD1/SFRP2/SOX9/ACTC1/TWIST1/FZD5/TMEM204/COL18A1                                                                                                                                                                                                                                                                                                                                                                                                                                                                                                                                                                                                                                                                                                                                                                                                                                                                                                                                                                                                                                                                                                                                                                                                                                                                                                                             | 34  |
| GO:0040011 | locomotion                                        | 54/311  | 1666/17046  | 2.09E-05 | 0.00289 | 0.00231 | CDH13/TBR1/ADCY3/APCDD1/CTGF/DNAH8/EGFR/EGR3/EPHA3/EPHB4/RASA3/VASH1/GAPDHS/GPER1/SERPIND1/NRG1/HSP90AA1/BARHL2/CYR61/IL6/ISL1/LCK/SMAD3/MAP3 K1/NOV/NTF3/LEF1/CEND1/ANGPT4/PIK3CG/ROBO4/PRKD1/BIN3/PSMB4/TRPC7/RASGRF2/CCL17/SFRP2/CXCR5/SGK1/SOX9/STK10/TRPC4/PHLDA2/TWIST1/PTP4A1/CACNB2/C XCR4/COL18A1/SH3BGL3/SCRT1/PARD6B/FADD/LIMD1                                                                                                                                                                                                                                                                                                                                                                                                                                                                                                                                                                                                                                                                                                                                                                                                                                                                                                                                                                                                                                                                                                                                                                                          | 54  |
| GO:0048869 | cellular developmental process                    | 99/311  | 3716/17046  | 2.25E-05 | 0.00301 | 0.0024  | CDH3/ZBTB18/TBR1/FRMD6/COL11A1/SCLT1/ZFP42/APCDD1/CTGF/ADRB3/COCH/DNMT3A/EGFR/EGR3/TMEM17/EML1/UNC13D/EPHA3/EPHB4/RASA3/ACIN1/FOXO1/SPG20/FL NB/MTOR/TENM4/GAPDHS/GNAS/GPER1/FLVCR1/ANXA2/KCNIP2/NRG1/HLA-B/HLX/HOXB3/HOXD3/HSP90AA1/FMN1/BARHL2/CYR61/IL6/ISL1/HLS1/INSC/LCK/LLGL1/SMAD3/MEF2D/MAP3K1/MEOX1/MF2/NOV/NTF3/PALM/LEF1/CEND1/CYTL1/MOV10L 1/ROBO4/PPP1CC/PIWIL2/SMPD3/PRKD1/BIN3/PSMB4/TRPC7/PXN/RASGRF2/S100A4/S100A6/CCL17/SFRP2/SGK1/SOX9/TAF4B/TCEA1/ACTC1/TRPC4/TWIST1/YWHAG/CACNB2/ PAX8/CXCR4/FZD5/PPDPF/TMEM204/COL18A1/SCRT1/PARD6B/LOXL3/CBX2/GAS7/FADD/LIMD1/H2AFY/MTL5/ARHGFE10/ULK2                                                                                                                                                                                                                                                                                                                                                                                                                                                                                                                                                                                                                                                                                                                                                                                                                                                                                                                       | 99  |
| GO:0072132 | mesenchyme morphogenesis                          | 6/311   | 33/17046    | 2.57E-05 | 0.00333 | 0.00266 | ISL1/SMAD3/LEF1/SOX9/ACTC1/TWIST1                                                                                                                                                                                                                                                                                                                                                                                                                                                                                                                                                                                                                                                                                                                                                                                                                                                                                                                                                                                                                                                                                                                                                                                                                                                                                                                                                                                                                                                                                                   | 6   |
| GO:0031348 | negative regulation of defense response           | 11/311  | 130/17046   | 2.64E-05 | 0.00333 | 0.00266 | NLRP6/GPER1/GSTP1/HLA-B/HLA-E/ISL1/SMAD3/NOV/IL20RB/PSMB4/NLRX1                                                                                                                                                                                                                                                                                                                                                                                                                                                                                                                                                                                                                                                                                                                                                                                                                                                                                                                                                                                                                                                                                                                                                                                                                                                                                                                                                                                                                                                                     | 11  |
| GO:0009888 | tissue development                                | 54/311  | 1684/17046  | 2.82E-05 | 0.00345 | 0.00275 | CDH3/ZBTB18/DMRT2/FRMD6/COL11A1/APCDD1/CTGF/DRD4/EGFR/EPHA3/SPG20/FLNB/TENM4/GJB2/GNAS/NRG1/HLX/HPCA/HOXB3/HOXD3/FMN1/BARHL2/CYR61/IL6/ISL1/ ACAT1/KRT15/INSC/SMAD3/MEF2D/MAP3K1/MEOX1/MEOX2/NOV/NTF3/LEF1/RIPK4/CYTL1/BNC2/BIN3/PXN/S100A4/SFRP2/SOX9/ACTC1/TIMP3/TWIST1/PAX8/FZD5/COL18A1/ KDM2B/LOXL3/LDB2/H2AFY                                                                                                                                                                                                                                                                                                                                                                                                                                                                                                                                                                                                                                                                                                                                                                                                                                                                                                                                                                                                                                                                                                                                                                                                                 | 54  |
| GO:0051171 | regulation of nitrogen compound metabolic process | 102/311 | 3889/17046  | 3.08E-05 | 0.00347 | 0.00277 | CDH13/MBNL2/C1D/ZBTB18/DMRT2/TBR1/NPFFR2/PSIP1/ZBED9/CIDEA/ZFP42/ADRB3/ZNF709/ZNF781/CITED4/RNF168/DNMT3A/DRD4/EGFR/EGR3/PATL2/SP8/XRN2/ACIN1/F OXO1/SPG20/LARP1/MTOR/GABBR1/GAPDHS/DKK3/GNAS/GPER1/ZBTB44/GTF2B/BRF1/GZMA/NRG1/HLX/HMGA1/HPCA/HOXB3/HOXC5/HOXC6/HOXD3/HSP90AA1/BARHL2/CY R61/IL6/ISL1/HLS1/SMAD3/ME1/MEF2D/MEOX1/MEOX2/NFYB/NTF3/PALM/LEF1/PGAM2/RIPK4/CYTL1/POMC/BNC2/PIWIL2/PRMT6/ZNF532/CNOT11/PRKD1/PSMB4/METTL14/ CCAR2/SFRP2/TRA2B/SGK1/SOX9/TAF4B/TBP/TCEA1/TLE3/TLR5/TRAFC4/PHLDA2/TWIST1/VARS/ZNF124/ZNF177/PAX8/FZD5/ZC3H14/ZNF606/SCRT1/HIST1H3A/SLA2/KDM2B/LOXL3/CBX2 /GAS7/FADD/LIMD1/LDB2/H2AFY                                                                                                                                                                                                                                                                                                                                                                                                                                                                                                                                                                                                                                                                                                                                                                                                                                                                                                      | 102 |
| GO:0040012 | regulation of locomotion                          | 28/311  | 659/17046   | 3.09E-05 | 0.00347 | 0.00277 | CDH13/TBR1/EGFR/VASH1/GPER1/CYR61/IL6/SMAD3/MAP3K1/NOV/NTF3/LEF1/ANGPT4/ROBO4/PRKD1/SFRP2/SGK1/SOX9/STK10/PHLDA2/TWIST1/PTP4A1/CXCR4/COL18A1/S H3BGL3/SCRT1/PARD6B/FADD                                                                                                                                                                                                                                                                                                                                                                                                                                                                                                                                                                                                                                                                                                                                                                                                                                                                                                                                                                                                                                                                                                                                                                                                                                                                                                                                                             | 28  |
| GO:0048513 | organ development                                 | 80/311  | 2848/17046  | 3.14E-05 | 0.00347 | 0.00277 | CDH3/ZBTB18/TBR1/SLC38A10/COL11A1/ZFP42/APCDD1/CTGF/DRD4/ECE1/EGFR/EGR3/EML1/EPHA3/EPHB4/ACIN1/FOXO1/SPG20/FLNB/MTOR/TENM4/GJB2/DKK3/GNAS/FLVC R1/NME7/ANXA2/NRG1/HLA-B/HLX/HPCA/HOXB3/HOXD3/HSD17B2/HTR5A/FMN1/BARHL2/CYR61/IL6/ISL1/ACAT1/INSC/SLC6A17/LCK/LOX/LTB/SMAD3/MEF2D/MAP3K1/MEOX1/MEOX2/NOV/NTF3/LEF1/CE ND1/CYTL1/BNC2/SMPD3/LIMS2/BIN3/S100A4/SFRP2/CXCR5/TRA2B/SOX9/TCEA1/ACTC1/TLE3/TLR5/PHLDA2/TWIST1/PAX8/FZD5/PPDPF/COL18A1/KDM2B/LOXL3/FADD/LDB2/ H2AFY                                                                                                                                                                                                                                                                                                                                                                                                                                                                                                                                                                                                                                                                                                                                                                                                                                                                                                                                                                                                                                                         | 80  |



|            |                                                |         |            |          |         |         |                                                                                                                                                                                                                                                                                                                                                                                                                                                                                                                                                                                                                                                                                                                                                                                                        |     |
|------------|------------------------------------------------|---------|------------|----------|---------|---------|--------------------------------------------------------------------------------------------------------------------------------------------------------------------------------------------------------------------------------------------------------------------------------------------------------------------------------------------------------------------------------------------------------------------------------------------------------------------------------------------------------------------------------------------------------------------------------------------------------------------------------------------------------------------------------------------------------------------------------------------------------------------------------------------------------|-----|
| GO:000904  | cell morphogenesis involved in differentiation | 36/311  | 958/17046  | 3.16E-05 | 0.00347 | 0.00277 | TBR1/FRMD6/EGFR/UNC13D/EPHA3/EPHB4/RASA3/SPG20/FLNB/NRG1/HSP90AA1/FMN1/BARHL2/ISL1/LLGL1/SMAD3/MAP3K1/MFI2/NTF3/LEF1/PSMB4/TRPC7/PXN/RASGRF2/S100A4/S100A6/SFRP2/SOX9/TRPC4/TWIST1/CACNB2/PAX8/COL18A1/PARD6B/LOXL3/ULK2                                                                                                                                                                                                                                                                                                                                                                                                                                                                                                                                                                               | 36  |
| GO:0007399 | nervous system development                     | 65/311  | 2174/17046 | 3.39E-05 | 0.00359 | 0.00286 | ZBTB18/TBR1/SCLT1/APCDD1/DNMT3A/EGFR/EGR3/EML1/EPHA3/EPHB4/RASA3/SPG20/MTOR/TENM4/SDCBP2/GPER1/GSTP1/NME7/KCNIP2/NRG1/HLX/HPCA/APBA2/HOXB3/HOXD3/HSP90AA1/HTR5A/FMN1/BARHL2/IL6/ISL1/ACAT1/INSC/SLC6A17/LLGL1/MEF2D/NTF3/PALM/LEF1/CEND1/PPP1CC/PRKD1/PSMB4/TRPC7/RASGRF2/S100A6/SFRP2/TRA2B/SGK1/SOX9/TIMP3/TRPC4/TWIST1/YWHAG/CACNB2/PAX8/CXCR4/FZD5/COLQ/SCRT1/PARD6B/KDM2B/GAS7/ARHGEF10/ULK2                                                                                                                                                                                                                                                                                                                                                                                                      | 65  |
| GO:0001944 | vasculature development                        | 25/311  | 557/17046  | 3.43E-05 | 0.00359 | 0.00286 | CDH13/CTGF/EGR3/EPHB4/VASH1/FOXO1/FLVCR1/ANXA2/HOXB3/CYR61/IL6/ISL1/LOX/MEOX2/NOV/LEF1/ANGPT4/PIK3CG/ROBO4/PRKD1/SFRP2/TWIST1/FZD5/TMEM204/COL18A1                                                                                                                                                                                                                                                                                                                                                                                                                                                                                                                                                                                                                                                     | 25  |
| GO:0003002 | regionalization                                | 18/311  | 332/17046  | 4.13E-05 | 0.00411 | 0.00327 | DMRT2/TBR1/SP8/NME7/HOXB3/HOXC5/HOXC6/HOXD3/ISL1/SMAD3/MEOX1/MEOX2/LEF1/SFRP2/TRA2B/PAX8/FZD5/KDM2B                                                                                                                                                                                                                                                                                                                                                                                                                                                                                                                                                                                                                                                                                                    | 18  |
| GO:2000145 | regulation of cell motility                    | 26/311  | 599/17046  | 4.19E-05 | 0.00411 | 0.00327 | CDH13/EGFR/VASH1/GPER1/CYR61/IL6/SMAD3/MAP3K1/NOV/NTF3/LEF1/ANGPT4/ROBO4/PRKD1/SFRP2/SGK1/SOX9/STK10/PHLDA2/TWIST1/PTP4A1/COL18A1/SH3BGLR3/SCR11/PARD6B/FADD                                                                                                                                                                                                                                                                                                                                                                                                                                                                                                                                                                                                                                           | 26  |
| GO:0050728 | negative regulation of inflammatory response   | 9/311   | 91/17046   | 4.21E-05 | 0.00411 | 0.00327 | NLRP6/GPER1/GSTP1/ISL1/SMAD3/NOV/IL20RB/PSMB4/NLRX1                                                                                                                                                                                                                                                                                                                                                                                                                                                                                                                                                                                                                                                                                                                                                    | 9   |
| GO:0030334 | regulation of cell migration                   | 25/311  | 568/17046  | 4.72E-05 | 0.00449 | 0.00358 | CDH13/EGFR/VASH1/GPER1/CYR61/IL6/SMAD3/MAP3K1/NOV/NTF3/LEF1/ANGPT4/ROBO4/PRKD1/SFRP2/SGK1/SOX9/STK10/PHLDA2/PTP4A1/COL18A1/SH3BGLR3/SCR11/PARD6B/FADD                                                                                                                                                                                                                                                                                                                                                                                                                                                                                                                                                                                                                                                  | 25  |
| GO:0001568 | blood vessel development                       | 24/311  | 536/17046  | 5.12E-05 | 0.00477 | 0.00381 | CDH13/CTGF/EGR3/EPHB4/VASH1/FOXO1/FLVCR1/ANXA2/HOXB3/CYR61/IL6/ISL1/LOX/MEOX2/NOV/LEF1/ANGPT4/PIK3CG/ROBO4/PRKD1/SFRP2/TWIST1/FZD5/COL18A1                                                                                                                                                                                                                                                                                                                                                                                                                                                                                                                                                                                                                                                             | 24  |
| GO:0048522 | positive regulation of cellular process        | 109/311 | 4283/17046 | 5.33E-05 | 0.00486 | 0.00388 | CDH3/TSPAN5/CDH13/TCIRG1/DMRT2/TBR1/HCT116/ADCY3/PSIP1/CTGF/ADRB3/TRPV3/CITED4/RNF168/DNMT3A/DRD4/ECE1/EGFR/EGR3/UNC13D/EPHA3/RASA3/PPM1E/ACIN1/FOXO1/LARP1/MTOR/TENM4/GAPDH/SLC22A1/VPS4A/GNAS/GPER1/DOK7/GSTP1/BRF1/GZMA/ANXA2/NRG1/HLA-E/HLX/HMGA1/HPCA/HOXD3/HSP90AA1/FMN1/BARHL2/CYR61/IL6/ISL1/LCK/LTB/SMAD3/MEF2D/MAP3K1/MEOX1/MEOX2/MFI2/NFYB/NOV/NTF3/PALM/ARHGEF3/LEF1/ANGPT4/PIK3CG/RIPK4/CYTL1/POMC/ZDHHC13/PIWIL2/SMPD3/LIMS2/PRKD1/PSMB4/ACTR3B/CCAR2/PXN/RASGRF2/S100A4/S100A6/CCL17/SFRP2/CXCR5/TRA2B/SOX9/STK10/VAMP2/TBP/TCEA1/TLR5/TRA1/TWIST1/YWHAG/PTP4A1/PAX8/CXCR4/FZD5/COL18A1/SLA2/MGARP/FADD/LIMD1/ZFAND2A/LDB2/LY86/RAB3D/H2AFY/ARHGEF10                                                                                                                                    | 109 |
| GO:0032989 | cellular component morphogenesis               | 47/311  | 1432/17046 | 5.76E-05 | 0.00514 | 0.00441 | TBR1/FRMD6/SCLT1/COCH/EGFR/TMEM17/UNC13D/EPHA3/EPHB4/RASA3/SPG20/FLNB/TENM4/NRG1/HSP90AA1/FMN1/BARHL2/IL6/ISL1/LLGL1/SMAD3/MAP3K1/MFI2/NTF3/PALM/LEF1/BIN3/PSMB4/TRPC7/PXN/RASGRF2/S100A4/S100A6/SFRP2/SGK1/SOX9/ACTC1/TRPC4/TWIST1/CACNB2/PAX8/COL18A1/PARD6B/LOXL3/GAS7/LIMD1/ULK2                                                                                                                                                                                                                                                                                                                                                                                                                                                                                                                   | 47  |
| GO:0000902 | cell morphogenesis                             | 45/311  | 1352/17046 | 6.08E-05 | 0.00532 | 0.00424 | TBR1/FRMD6/SCLT1/COCH/EGFR/TMEM17/UNC13D/EPHA3/EPHB4/RASA3/SPG20/FLNB/NRG1/HSP90AA1/FMN1/BARHL2/IL6/ISL1/LLGL1/SMAD3/MAP3K1/MFI2/NTF3/PALM/LEF1/BIN3/PSMB4/TRPC7/PXN/RASGRF2/S100A4/S100A6/SFRP2/SGK1/SOX9/TRPC4/TWIST1/CACNB2/PAX8/COL18A1/PARD6B/LOXL3/GAS7/LIMD1/ULK2                                                                                                                                                                                                                                                                                                                                                                                                                                                                                                                               | 45  |
| GO:0045761 | regulation of adenylate cyclase activity       | 8/311   | 75/17046   | 6.55E-05 | 0.00556 | 0.00443 | NPFRR2/ADRB3/DRD4/GABBR1/GNAS/GPER1/HPCA/PALM                                                                                                                                                                                                                                                                                                                                                                                                                                                                                                                                                                                                                                                                                                                                                          | 8   |
| GO:0061448 | connective tissue development                  | 14/311  | 224/17046  | 6.62E-05 | 0.00556 | 0.00443 | COL11A1/CTGF/SPG20/GNAS/HOXB3/HOXD3/CYR61/ACAT1/SMAD3/MEF2D/NOV/CYTL1/SFRP2/SOX9                                                                                                                                                                                                                                                                                                                                                                                                                                                                                                                                                                                                                                                                                                                       | 14  |
| GO:0010468 | regulation of gene expression                  | 99/311  | 3819/17046 | 6.97E-05 | 0.00575 | 0.00458 | CDH3/CDH13/MBNL2/C1D/ZBTB18/DMRT2/TBR1/PSIP1/ZBED9/CIDEA/ZFP42/CTGF/ZNF709/ZNF781/CITED4/RNF168/DNMT3A/EGFR/EGR3/PATL2/SP8/XRN2/ACIN1/FOXO1/SPG20/LARP1/MTOR/DKK3/GNAS/GPER1/ZBTB44/GTF2B/BRF1/NRG1/HLX/HMGA1/APBA2/HOXB3/HOXC5/HOXC6/HOXD3/BARHL2/CYR61/IL6/ISL1/HLS1/LCK/SMAD3/MEF2D/MEOX1/MEOX2/MFI2/NFYB/NOV/NTF3/LEF1/RIPK4/CYTL1/POMC/BNC2/PPP1CC/PIWIL2/PRMT6/ZNF532/CNOT11/PRKD1/MASP1/METTL14/CCAR2/SFRP2/TRA2B/SGK1/SOX9/TAF4B/TBP/TCEA1/ACTC1/TLE3/TRA1/PHLDA2/TWIST1/VARS/ZNF124/ZNF177/PAX8/FZD5/ZC3H14/ZNF606/SCRT1/HIST1H3A/SLA2/KDM2B/LOXL3/CBX2/GAS7/FADD/LIMD1/LDB2/H2AFY                                                                                                                                                                                                            | 99  |
| GO:0051179 | localization                                   | 126/311 | 5173/17046 | 7.73E-05 | 0.00625 | 0.00498 | CDH3/TSPAN5/CDH13/KCNMB2/TCIRG1/ABCA9/TBR1/ADCY3/SLC27A2/CHRNA5/CIDEA/CLCA1/FRMD6/C1orf27/SLC38A10/TRPM6/APCDD1/CTGF/CYB561/FITM1/TRPV3/NLRP6/DNAH8/DRD4/EGFR/EGR3/UNC13D/EPHA3/EPHB4/RASA3/VASH1/FLNB/ATP11A/MTOR/GAPDH/GJA3/GJB2/SDCBP2/GLS2/VPS4A/GNAS/CRACR2B/PIGW/GPER1/FLVCR1/GSTP1/NME7/ANXA2/KCNIP2/NRG1/ANXA6/HLA-E/HPCA/APBA2/HSP90AA1/BARHL2/CYR61/IL6/ISL1/ATP9B/INSC/TOMM20L/SLC6A17/LCK/LLGL1/LTPB1/SMAD3/MAP3K1/MFI2/NOV/NTF3/PALM/LEF1/CEND1/ANGPT4/PDE4C/PIK3CG/POMC/PON1/ZDHHC13/ROBO4/SMPD3/SYBU/PRKD1/BIN3/MASP1/TRPC7/RASGRF2/EXOC4/RPL8/RPL29/S100A6/CCL17/SFRP2/SGK1/SOX9/STK10/VAMP2/TRAPPC10/TRPC4/PHLDA2/TWIST1/YWHAG/PTP4A1/CACNB2/PAX8/CXCR4/FZD5/RAB11FIP1/COL18A1/UNC93B1/COLQ/SH3BGLR3/SCR11/PARD6B/LOXL3/MGARP/FADD/LIMD1/MAP7/SMGT1/REEP6/RAB3D/H2AFY/USP6NL/RABGAP1L | 126 |

|            |                                                                |         |            |          |         |         |                                                                                                                                                                                                                                                                                                                                                                                                                                                                                                                                                                                                               |     |
|------------|----------------------------------------------------------------|---------|------------|----------|---------|---------|---------------------------------------------------------------------------------------------------------------------------------------------------------------------------------------------------------------------------------------------------------------------------------------------------------------------------------------------------------------------------------------------------------------------------------------------------------------------------------------------------------------------------------------------------------------------------------------------------------------|-----|
| GO:0032879 | regulation of localization                                     | 63/311  | 2151/17046 | 8.49E-05 | 0.00661 | 0.00527 | CDH3/CDH13/TBR1/CIDEA/FITM1/TRPV3/NLRP6/DRD4/EGFR/UNC13D/VASH1/MTOR/GLS2/VPS4A/GNAS/CRACR2B/GPER1/ANXA2/KCNIP2/NRG1/HLA-E/HPCA/CYR61/IL6/ISL1/LCK/LLGL1/SMAD3/MAP3K1/NOV/NTF3/LEF1/ANGPT4/PDE4C/PIK3CG/POMC/PON1/ROBO4/SMPD3/SYBU/PRKD1/RASGRF2/SFRP2/SGK1/SOX9/STK10/VAMP2/PHLDA2/TWIST1/YWHAG/PTP4A1/CACNB2/PAX8/FZD5/RAB11FIP1/COL18A1/SH3BGL3/SCRT1/PARD6B/FADD/REEP6/RAB3D/RABGAP1L                                                                                                                                                                                                                      | 63  |
| GO:0050790 | regulation of catalytic activity                               | 63/311  | 2151/17046 | 8.49E-05 | 0.00661 | 0.00527 | CDH3/NPFFR2/ADCY3/CTGF/ADRB3/DRD4/EGFR/EPHA3/RASA3/PPM1E/TBC1D9B/MTOR/GABBR1/RGS22/GNAS/GPER1/DOK7/GSTP1/GZMA/ANXA2/SERPIND1/NRG1/HPCA/HSP90AA1/COL28A1/CYR61/IL6/ITIH3/LCK/LLGL1/SMAD3/MAP3K1/NTF3/PALM/ARHGFEF3/LEF1/ANGPT4/PIK3CG/ARHGFEF10L/VAC14/PRKD1/PSMB4/CCAR2/PXN/RASGRF2/CCL17/SFRP2/SGK1/STK10/TCEA1/TIMP3/TNXB/YWHAG/CXCR4/FZD5/SH3BGL3/SPINK7/FADD/ARHGAP29/H2AFY/ARHGFEF10/USP6NL/RABGAP1L                                                                                                                                                                                                     | 63  |
| GO:0043009 | chordate embryonic development                                 | 25/311  | 593/17046  | 9.38E-05 | 0.00718 | 0.00573 | ZBTB18/DMRT2/COL11A1/ZFP42/ECE1/EGFR/GNAS/FLVCR1/APBA2/HOXB3/HOXC5/HOXC6/HOXD3/HSD17B2/CYR61/ISL1/RESP18/SMAD3/MEOX1/MEOX2/LEF1/SFRP2/TWIST1/FZD5/KDM2B                                                                                                                                                                                                                                                                                                                                                                                                                                                       | 25  |
| GO:0046058 | cAMP metabolic process                                         | 11/311  | 150/17046  | 9.81E-05 | 0.00738 | 0.00588 | NPFFR2/ADCY3/ADRB3/DRD4/GABBR1/GNAS/GPER1/HPCA/PALM/PDE4C/PDE7A                                                                                                                                                                                                                                                                                                                                                                                                                                                                                                                                               | 11  |
| GO:0019219 | regulation of nucleobase-containing compound metabolic process | 94/311  | 3617/17046 | 0.00011  | 0.00771 | 0.00615 | CDH13/MBNL2/C1D/ZBTB18/DMRT2/TBR1/NPFFR2/PSIP1/ZBED9/CIDEA/ZFP42/ADRB3/ZNF709/ZNF781/CITED4/RNF168/DNMT3A/DRD4/EGFR/EGR3/SP8/XRN2/ACIN1/FOXO1/SPG20/MTOR/GABBR1/GAPDHS/DKK3/GNAS/GPER1/ZBTB44/GTF2B/BRF1/GZMA/NRG1/HLX/HMGA1/HPCA/HOXB3/HOXC5/HOXC6/HOXD3/BARHL2/CYR61/IL6/ISL1/HILS1/SMAD3/ME1/MEF2D/MEOX1/MEOX2/NFYB/NTF3/PALM/LEF1/PGAM2/RIPK4/CYTL1/POMC/BNC2/PRMT6/ZNF532/CNOT11/PRKD1/CCAR2/SFRP2/TRA2B/SGK1/SOX9/TAF4B/TBP/TCEA1/TLE3/TRA1/TWIST1/ZNF124/ZNF177/PAX8/FZD5/ZC3H14/ZNF606/SCRT1/HIST1H3A/SLA2/KDM2B/LOXL3/CBX2/GAS7/FADD/LIMD1/LDB2/H2AFY                                                | 94  |
| GO:0009792 | embryo development ending in birth or egg hatching             | 25/311  | 598/17046  | 0.00011  | 0.00771 | 0.00615 | ZBTB18/DMRT2/COL11A1/ZFP42/ECE1/EGFR/GNAS/FLVCR1/APBA2/HOXB3/HOXC5/HOXC6/HOXD3/HSD17B2/CYR61/ISL1/RESP18/SMAD3/MEOX1/MEOX2/LEF1/SFRP2/TWIST1/FZD5/KDM2B                                                                                                                                                                                                                                                                                                                                                                                                                                                       | 25  |
| GO:0060485 | mesenchyme development                                         | 13/311  | 206/17046  | 0.00011  | 0.00771 | 0.00615 | EPHA3/NRG1/ISL1/SMAD3/MEOX1/LEF1/BNC2/S100A4/SFRP2/SOX9/ACTC1/TWIST1/LOXL3                                                                                                                                                                                                                                                                                                                                                                                                                                                                                                                                    | 13  |
| GO:0051270 | regulation of cellular component movement                      | 27/311  | 672/17046  | 0.00011  | 0.00771 | 0.00615 | CDH13/TBR1/EGFR/VASH1/GPER1/CYR61/IL6/SMAD3/MAP3K1/NOV/NTF3/LEF1/ANGPT4/ROBO4/PRKD1/SFRP2/SGK1/SOX9/STK10/PHLDA2/TWIST1/PTP4A1/COL18A1/SH3BGL3/SCRT1/PARD6B/FADD                                                                                                                                                                                                                                                                                                                                                                                                                                              | 27  |
| GO:0051216 | cartilage development                                          | 12/311  | 179/17046  | 0.00011  | 0.00781 | 0.00623 | COL11A1/CTGF/GNAS/HOXB3/HOXD3/CYR61/SMAD3/MEF2D/NOV/CYTL1/SFRP2/SOX9                                                                                                                                                                                                                                                                                                                                                                                                                                                                                                                                          | 12  |
| GO:0065009 | regulation of molecular function                               | 72/311  | 2588/17046 | 0.00012  | 0.00825 | 0.00658 | CDH3/NPFFR2/ADCY3/CTGF/ADRB3/DRD4/EGFR/EPHA3/RASA3/PPM1E/TBC1D9B/MTOR/GABBR1/RGS22/GNAS/GPER1/DOK7/GSTP1/GZMA/ANXA2/SERPIND1/KCNIP2/NRG1/HPCA/HSP90AA1/COL28A1/CYR61/IL6/ISL1/ITIH3/LCK/LLGL1/SMAD3/MAP3K1/NTF3/PALM/ARHGFEF3/LEF1/ANGPT4/PIK3CG/RIPK4/CYTL1/PON1/ARHGFEF10L/VAC14/PRKD1/PSMB4/CCAR2/PXN/RASGRF2/CCL17/SFRP2/SGK1/STK10/VAMP2/TCEA1/TIMP3/TNXB/TRA1/TWIST1/YWHAG/CACNB2/CXCR4/FZD5/SH3BGL3/SPINK7/FADD/ARHGAP29/H2AFY/ARHGFEF10/USP6NL/RABGAP1L                                                                                                                                               | 72  |
| GO:0048706 | embryonic skeletal system development                          | 10/311  | 129/17046  | 0.00013  | 0.00858 | 0.00684 | DMRT2/COL11A1/GNAS/FLVCR1/HOXB3/HOXC5/HOXC6/HOXD3/SMAD3/TWIST1                                                                                                                                                                                                                                                                                                                                                                                                                                                                                                                                                | 10  |
| GO:0009605 | response to external stimulus                                  | 67/311  | 2366/17046 | 0.00013  | 0.00876 | 0.00698 | CDH13/TBR1/COL11A1/ADRB3/COCH/NLRP6/DNMT3A/EGFR/EGR3/UNC13D/EPHA3/EPHB4/RASA3/ACIN1/FOXO1/LARP1/MTOR/GPER1/GSTP1/ANXA2/SERPIND1/NRG1/HLA-B/HLA-E/HMGA1/HSP90AA1/CYR61/IL6/ISL1/ACAT1/KRT15/LCK/SMAD3/MAP3K1/NUDT1/NOV/NTF3/LEF1/PIK3CG/IL20RB/POMC/PON1/PPP1CC/PRKD1/MASP1/PSMB4/TRPC7/RASGRF2/DEFB134/CCL17/SFRP2/CXCR5/SOX9/TIMP3/TLR5/TRPC4/UPP1/CACNB2/CXCR4/FZD5/NLRX1/UNC93B1/CAPS/HIST1H3A/FADD/LY86/ULK2                                                                                                                                                                                              | 67  |
| GO:0009889 | regulation of biosynthetic process                             | 98/311  | 3834/17046 | 0.00013  | 0.00876 | 0.00699 | CDH3/CDH13/C1D/ZBTB18/DMRT2/TBR1/NPFFR2/PSIP1/ZBED9/CIDEA/ZFP42/CTGF/ADRB3/ZNF709/ZNF781/CITED4/RNF168/DNMT3A/DRD4/EGFR/EGR3/PATL2/SP8/XRN2/FOXO1/SPG20/LARP1/MTOR/GABBR1/DKK3/GNAS/GPER1/ZBTB44/GSTP1/GTF2B/BRF1/NRG1/HLX/HMGA1/HPCA/HOXB3/HOXC5/HOXC6/HOXD3/ACADL/HSP90AA1/BARHL2/CYR61/IL6/ISL1/HILS1/LTB/SMAD3/MEF2D/MEOX1/MEOX2/NFYB/NTF3/PALM/LEF1/RIPK4/CYTL1/POMC/BNC2/PIWIL2/PRMT6/ZNF532/CNOT11/PRKD1/METTL14/CCAR2/SFRP2/SGK1/SOX9/TAF4B/TBP/TCEA1/TLE3/TLR5/TRA1/TWIST1/VARS/ZNF124/ZNF177/PAX8/FZD5/ZNF606/SCRT1/HIST1H3A/SLA2/KDM2B/LOXL3/CBX2/GAS7/FADD/LIMD1/LDB2/H2AFY                       | 98  |
| GO:1901362 | organic cyclic compound biosynthetic process                   | 102/311 | 4032/17046 | 0.00014  | 0.00881 | 0.00702 | CDH3/CDH13/TCIRG1/C1D/ZBTB18/DMRT2/TBR1/NPFFR2/ADCY3/SLC27A2/PSIP1/ZBED9/CIDEA/ZFP42/CTGF/ADRB3/ADAL/ZNF709/ZNF781/CITED4/RNF168/DNMT3A/DRD4/EGFR/EGR3/ALAS1/SP8/XRN2/FOXO1/MTOR/GABBR1/AMPD2/DKK3/GLS2/GNAS/GPER1/ZBTB44/GTF2B/BRF1/NME7/NRG1/HLX/HMGA1/HPCA/HOXB3/HOXC5/HOXC6/HOXD3/HSD17B2/BARHL2/CYR61/IL6/ISL1/HILS1/SMAD3/ME1/MEF2D/MEOX1/MEOX2/NFYB/NTF3/PALM/LEF1/RIPK4/CYTL1/POMC/BNC2/PRMT6/ZNF532/CNOT11/PRKD1/CCAR2/RPL8/RPL29/SFRP2/SGK1/SOX9/TAF4B/TBP/TCEA1/TLE3/TRA1/TWIST1/UPP1/YWHAG/ZNF124/ZNF177/PAX8/FZD5/ZNF606/SCRT1/HIST1H3A/SLA2/KDM2B/LOXL3/CBX2/GAS7/FADD/LIMD1/LDB2/SDR42E1/H2AFY | 102 |

|            |                                                          |        |            |         |         |         |                                                                                                                                                                                                                                                                                                                                                                                                                                                                                                                                                                                         |    |
|------------|----------------------------------------------------------|--------|------------|---------|---------|---------|-----------------------------------------------------------------------------------------------------------------------------------------------------------------------------------------------------------------------------------------------------------------------------------------------------------------------------------------------------------------------------------------------------------------------------------------------------------------------------------------------------------------------------------------------------------------------------------------|----|
| GO:0065008 | regulation of biological quality                         | 85/311 | 3225/17046 | 0.00016 | 0.01034 | 0.00825 | CDH3/KCNMB2/TCIRG1/ZBTB18/ADCY3/CHRNA5/CIDEA/C15orf27/ZG16B/CTGF/ADRB3/FITM1/COCH/NLRP6/DRD4/ECE1/ACIN1/FOXO1/SPG20/FLNB/ATP11A/MTOR/AMPD2/DK3/GLS2/GNAS/GPER1/FLVCR1/GSTP1/BRF1/ANXA2/SERPIND1/KCNIP2/ANXA6/ACADL/FMN1/BARHL2/IL6/ISL1/ATP9B/LCK/LTBP1/SMAD3/MAP3K1/MFI2/NOV/PALM/LEF1/ANGPT4/PDE4C/PIK3CG/IL20RB/CYTL1/POMC/SMPD3/SYBU/PRKD1/TRPC7/ACTR3B/METTL14/CCAR2/PXN/RASGRF2/SGK1/SOX9/VAMP2/TCEA1/TRPC4/VARS/YWHAG/PAX8/CXCR4/ZC3H14/RAB11FIP1/COLQ/SH3BGL3/HIST1H3A/GAS7/FADD/LIMD1/LDB2/SMDT1/RAB39/MTL5/ULK2                                                               | 85 |
| GO:0048705 | skeletal system morphogenesis                            | 13/311 | 215/17046  | 0.00017 | 0.01037 | 0.00827 | COL11A1/CTGF/GNAS/FLVCR1/HOXB3/HOXD3/FMN1/SMAD3/MEF2D/BNC2/SFRP2/SOX9/TWIST1                                                                                                                                                                                                                                                                                                                                                                                                                                                                                                            | 13 |
| GO:0048514 | blood vessel morphogenesis                               | 21/311 | 475/17046  | 0.00018 | 0.01091 | 0.0087  | CDH13/CTGF/EGR3/EPHB4/VASH1/ANXA2/HOXB3/CYR61/IL6/ISL1/MEOX2/NOV/LEF1/ANGPT4/PIK3CG/ROBO4/PRKD1/SFRP2/TWIST1/FZD5/COL18A1                                                                                                                                                                                                                                                                                                                                                                                                                                                               | 21 |
| GO:0006796 | phosphate-containing compound metabolic process          | 76/311 | 2808/17046 | 0.00018 | 0.01091 | 0.0087  | BCKDK/TCIRG1/HCST/NPFFR2/ADCY3/ALPK2/APOA1BP/TRPM6/CTGF/ADRB3/FITM1/ADAL/NLRP6/DRD4/EGFR/EPHA3/EPHB4/RASA3/PPM1E/FOXO1/MTOR/GABBR1/GAK/GAPDHS/AMPD2/GNAS/PIGW/GPER1/DOK7/GSTP1/NME7/ANXA2/NRG1/HPCA/CYR61/IL6/ISL1/LCK/SMAD3/ME1/MAP3K1/NUDT1/NTF3/PALM/ANGPT4/PDE4C/PDE7A/PGAM2/PIGC/PIK3CG/RIPK4/PON1/LPCAT2/PPP1CC/SMPD3/VAC14/PRKD1/PSMB4/PXN/RASGRF2/CCL17/SFRP2/SGK1/CERK/SOX9/STK10/TNXB/TWIST1/UPP1/YWHAG/PTP4A1/CXCR4/FZD5/LIMD1/H2AFY/ULK2                                                                                                                                    | 76 |
| GO:0019438 | aromatic compound biosynthetic process                   | 99/311 | 3915/17046 | 0.00019 | 0.01107 | 0.00882 | CDH3/CDH13/TCIRG1/C1D/ZBTB18/DMRT2/TBR1/NPFFR2/ADCY3/PSIP1/ZBED9/CIDEA/ZFP42/CTGF/ADRB3/ADAL/ZNF709/ZNF781/CITED4/RNF168/DNMT3A/DRD4/EGFR/EGR3/ALAS1/SP8/XRN2/FOXO1/MTOR/GABBR1/AMPD2/DKK3/GLS2/GNAS/GPER1/ZBTB44/GTF2B/BRF1/NME7/NRG1/HLX/HMGA1/HPCA/HOXB3/HOXC5/HOXC6/HOXD3/BARHL2/CYR61/IL6/ISL1/HILS1/SMAD3/ME1/MEF2D/MEOX1/MEOX2/NFYB/NTF3/PALM/LEF1/RIPK4/CYTL1/POMC/BNC2/PRMT6/ZNF532/CNOT11/PRKD1/CCAR2/RPL8/RPL29/SFRP2/SGK1/SOX9/TAFA4B/TBP/TCEA1/TLE3/TRAF1/TWIST1/UPP1/YWHAG/ZNF124/ZNF177/PAX8/FZD5/ZNF606/SCRT1/HIST1H3A/SLA2/KDM2B/LOXL3/CBX2/GAS7/FADD/LIMD1/LDB2/H2AFY | 99 |
| GO:0001501 | skeletal system development                              | 21/311 | 478/17046  | 0.0002  | 0.01148 | 0.00915 | DMRT2/SLC38A10/COL11A1/CTGF/GNAS/FLVCR1/ANXA2/HOXB3/HOXC5/HOXC6/HOXD3/FMN1/CYR61/SMAD3/MEF2D/NOV/CYTL1/BNC2/SFRP2/SOX9/TWIST1                                                                                                                                                                                                                                                                                                                                                                                                                                                           | 21 |
| GO:0048646 | anatomical structure formation involved in morphogenesis | 37/311 | 1090/17046 | 0.0002  | 0.01148 | 0.00915 | CDH13/DMRT2/TBR1/COL11A1/SCLT1/CTGF/EGR3/TMEM17/UNC13D/EPHB4/VASH1/TENM4/GNAS/ANXA2/HOXB3/FMN1/CYR61/IL6/ISL1/SMAD3/MEOX1/MEOX2/NOV/LEF1/CEMD1/ANGPT4/PIK3CG/ROBO4/PRKD1/SFRP2/SOX9/ACTC1/TWIST1/PAX8/FZD5/COL18A1/KDM2B                                                                                                                                                                                                                                                                                                                                                                | 37 |
| GO:0009187 | cyclic nucleotide metabolic process                      | 12/311 | 191/17046  | 0.00021 | 0.01188 | 0.00947 | NPFFR2/ADCY3/ADRB3/DRD4/GABBR1/AMPD2/GNAS/GPER1/HPCA/PALM/PDE4C/PDE7A                                                                                                                                                                                                                                                                                                                                                                                                                                                                                                                   | 12 |
| GO:0007155 | cell adhesion                                            | 43/311 | 1343/17046 | 0.00021 | 0.01199 | 0.00956 | CDH3/CDH13/CTGF/DSG3/EGFR/EGR3/UNC13D/EPHA3/EPHB4/MTOR/GNAS/IZUMO1/NRG1/HLA-E/HLX/HOXD3/COL28A1/FMN1/CYR61/IL6/CDHR4/LCK/SMAD3/MFI2/NEDD9/NOV/LEF1/PIK3CG/IL20RB/LIMS2/PCDHGC4/PCDHGB7/PCDHGA11/PXN/SFRP2/SOX9/STK10/TNXB/FZD5/COL18A1/SLA2/FADD/IL32                                                                                                                                                                                                                                                                                                                                   | 43 |
| GO:0031279 | regulation of cyclase activity                           | 8/311  | 89/17046   | 0.00022 | 0.0121  | 0.00965 | NPFFR2/ADRB3/DRD4/GABBR1/GNAS/GPER1/HPCA/PALM                                                                                                                                                                                                                                                                                                                                                                                                                                                                                                                                           | 8  |
| GO:0023051 | regulation of signaling                                  | 73/311 | 2685/17046 | 0.00022 | 0.0121  | 0.00965 | CDH3/TSPAN5/CDH13/HCST/NPFFR2/CIDEA/APCDD1/CTGF/ADRB3/NLRP6/DRD4/ECE1/EGFR/RASA3/FOXO1/SPG20/MTOR/RGS22/DKK3/GNAS/GPER1/GSTP1/ANXA2/NRG1/CYR61/IL6/ISL1/LCK/LLGL1/LTBP1/SMAD3/MAP3K1/NOV/NTF3/PALM/ARHGEF3/LEF1/PDE4C/PIK3CG/POMC/ZDHHC13/PPP1CC/ARHGEF10L/SYBU/LIMS2/PRKD1/PSMB4/CCAR2/PXN/RASGRF2/S100A4/CCL17/SFRP2/SOX9/VAMP2/TLR5/TNXB/TRAF1/TWIST1/YWHAG/PAX8/CXCR4/FZD5/TMEM204/NLRX1/RAB11FIP1/SLA2/FADD/LIMD1/ARHGAP29/LY86/ARHGEF10/TELO2                                                                                                                                     | 73 |
| GO:0022610 | biological adhesion                                      | 43/311 | 1348/17046 | 0.00023 | 0.01246 | 0.00993 | CDH3/CDH13/CTGF/DSG3/EGFR/EGR3/UNC13D/EPHA3/EPHB4/MTOR/GNAS/IZUMO1/NRG1/HLA-E/HLX/HOXD3/COL28A1/FMN1/CYR61/IL6/CDHR4/LCK/SMAD3/MFI2/NEDD9/NOV/LEF1/PIK3CG/IL20RB/LIMS2/PCDHGC4/PCDHGB7/PCDHGA11/PXN/SFRP2/SOX9/STK10/TNXB/FZD5/COL18A1/SLA2/FADD/IL32                                                                                                                                                                                                                                                                                                                                   | 43 |
| GO:0009966 | regulation of signal transduction                        | 66/311 | 2366/17046 | 0.00023 | 0.01246 | 0.00993 | CDH3/TSPAN5/CDH13/HCST/NPFFR2/CIDEA/APCDD1/CTGF/ADRB3/NLRP6/DRD4/EGFR/RASA3/FOXO1/SPG20/MTOR/RGS22/DKK3/GNAS/GPER1/GSTP1/ANXA2/NRG1/CYR61/IL6/ISL1/LCK/LLGL1/LTBP1/SMAD3/MAP3K1/NOV/NTF3/PALM/ARHGEF3/LEF1/PIK3CG/ZDHHC13/PPP1CC/ARHGEF10L/LIMS2/PRKD1/PSMB4/CCAR2/PXN/RASGRF2/S100A4/CCL17/SFRP2/SOX9/TLR5/TNXB/TRAF1/TWIST1/YWHAG/CXCR4/FZD5/TMEM204/NLRX1/SLA2/FADD/LIMD1/ARHGAP29/LY86/ARHGEF10/TELO2                                                                                                                                                                               | 66 |
| GO:0031326 | regulation of cellular biosynthetic process              | 96/311 | 3792/17046 | 0.00024 | 0.01246 | 0.00993 | CDH3/CDH13/C1D/ZBTB18/DMRT2/TBR1/NPFFR2/PSIP1/ZBED9/CIDEA/ZFP42/ADRB3/ZNF709/ZNF781/CITED4/RNF168/DNMT3A/DRD4/EGFR/EGR3/PATL2/SP8/XRN2/FOXO1/SPG20/LARP1/MTOR/GABBR1/DKK3/GNAS/GPER1/ZBTB44/GTF2B/BRF1/NRG1/HLX/HMGA1/HPCA/HOXB3/HOXC5/HOXC6/HOXD3/ACADL/HSP90AA1/BARHL2/CYR61/IL6/ISL1/HILS1/LTB/SMAD3/MEF2D/MEOX1/MEOX2/NFYB/NTF3/PALM/LEF1/RIPK4/CYTL1/POMC/BNC2/PIWIL2/PRMT6/ZNF532/CNOT11/PRKD1/METTL14/CCAR2/SFRP2/SGK1/SOX9/TAFA4B/TBP/TCEA1/TLE3/TLR5/TRAF1/TWIST1/VARS/ZNF124/ZNF177/PAX8/FZD5/ZNF606/SCRT1/HIST1H3A/SLA2/KDM2B/LOXL3/CBX2/GAS7/FADD/LIMD1/LDB2/H2AFY          | 96 |
| GO:1902531 | regulation of intracellular signal transduction          | 46/311 | 1479/17046 | 0.00024 | 0.01267 | 0.0101  | CDH13/HCST/NPFFR2/CTGF/ADRB3/NLRP6/DRD4/EGFR/RASA3/FOXO1/MTOR/GNAS/GPER1/GSTP1/NRG1/CYR61/IL6/ISL1/LCK/MAP3K1/NOV/NTF3/ARHGEF3/PIK3CG/ZDHHC13/ARHGEF10L/PRKD1/PSMB4/CCAR2/PXN/RASGRF2/S100A4/CCL17/SFRP2/SOX9/TNXB/TWIST1/CXCR4/FZD5/NLRX1/SLA2/FADD/LIMD1/ARHGAP29/ARHGEF10/TELO2                                                                                                                                                                                                                                                                                                      | 46 |

|            |                                                     |         |            |         |         |         |                                                                                                                                                                                                                                                                                                                                                                                                                                                                                                                                                                                                                                      |     |
|------------|-----------------------------------------------------|---------|------------|---------|---------|---------|--------------------------------------------------------------------------------------------------------------------------------------------------------------------------------------------------------------------------------------------------------------------------------------------------------------------------------------------------------------------------------------------------------------------------------------------------------------------------------------------------------------------------------------------------------------------------------------------------------------------------------------|-----|
| GO:0034654 | nucleobase-containing compound biosynthetic process | 97/311  | 3846/17046 | 0.00025 | 0.01276 | 0.01018 | CDH13/TCIRG1/C1D/ZBTB18/DMRT2/TBR1/NPFFR2/ADCY3/PSIP1/ZBED9/CIDEA/ZFP42/CTGF/ADRB3/ADAL/ZNF709/ZNF781/CITED4/RNF168/DNMT3A/DRD4/EGFR/EGR3/SP8/XRN2/FOXO1/MTOR/GABBR1/AMPD2/DKK3/GLS2/GNAS/GPER1/ZBTB44/GTF2B/BRF1/NME7/NRG1/HLX/HMGA1/HPCA/HOXB3/HOXC5/HOXC6/HOXD3/BARHL2/CYR61/IL6/ISL1/HILS1/SMAD3/ME1/MEF2D/MEOX1/MEOX2/NFYB/NTF3/PALM/LEF1/RIPK4/CYTL1/POMC/BNC2/PRMT6/ZNF532/CNOT11/PRKD1/CCAR2/RPL8/RPL29/SFRP2/SGK1/SOX9/TAF4B/TBP/TCEA1/TLE3/TRAF1/TWIST1/UPOP1/YWHAG/ZNF124/ZNF177/PAX8/FZD5/ZNF606/SCRT1/HIST1H3A/SLA2/KDM2B/LOXL3/CBX2/GAS7/FADD/LIMD1/LDB2/H2AFY                                                         | 97  |
| GO:0051339 | regulation of lyase activity                        | 8/311   | 91/17046   | 0.00026 | 0.01299 | 0.01036 | NPFFR2/ADRB3/DRD4/GABBR1/GNAS/GPER1/HPCA/PALM                                                                                                                                                                                                                                                                                                                                                                                                                                                                                                                                                                                        | 8   |
| GO:0006915 | apoptotic process                                   | 51/311  | 1700/17046 | 0.00026 | 0.01299 | 0.01036 | C1D/CIDEA/ANKRD9/CTGF/DNMT3A/DSG3/EGFR/EGR3/ACIN1/FOXO1/SL2/GPER1/GSTP1/GZMA/NRG1/ANXA6/CYR61/IL6/ISL1/LCK/SMAD3/MEF2D/MAP3K1/NTF3/ARHGFE3/LEF1/DDX47/ANGPT4/PIK3CG/PLEC/LIMS2/PRKD1/PSMB4/CCAR2/RASGRF2/SFRP2/SGK1/SOX9/STK10/ACTC1/TRAF1/PHLDA2/TWIST1/YWHAG/PAX8/CXCR4/FZD5/COL18A1/KDM2B/FADD/LY86                                                                                                                                                                                                                                                                                                                               | 51  |
| GO:0006816 | calcium ion transport                               | 17/311  | 352/17046  | 0.00027 | 0.01331 | 0.01062 | CLCA1/C15orf27/TRPM6/CTGF/TRPV3/DRD4/RASA3/CRACR2B/GPER1/ANXA6/LCK/PIK3CG/PRKD1/TRPC7/TRPC4/CACNB2/SMDT1                                                                                                                                                                                                                                                                                                                                                                                                                                                                                                                             | 17  |
| GO:0030878 | thyroid gland development                           | 4/311   | 18/17046   | 0.00027 | 0.01331 | 0.01062 | HOXB3/HOXD3/SMAD3/PAX8                                                                                                                                                                                                                                                                                                                                                                                                                                                                                                                                                                                                               | 4   |
| GO:0048519 | negative regulation of biological process           | 103/311 | 4153/17046 | 0.00027 | 0.01331 | 0.01062 | CDH3/CDH13/C1D/ZBTB18/B4GALT7/CIDEA/ANKRD9/APCDD1/CTGF/ADRB3/TRPV3/RNF168/NLRP6/DNMT3A/DRD4/EGFR/EGR3/PATL2/RASA3/PPM1E/VASH1/ACIN1/FOXO1/SPG20/MTOR/GABBR1/RGS22/FBXO2/DKK3/VPS4A/GNAS/GPER1/GSTP1/GZMA/ANXA2/SERPIND1/NRG1/HLA-B/HLA-E/HLX/HMGA1/HPCA/HOXB3/HOXC6/ACADL/COL28A1/CYR61/IL6/ISL1/ITIH3/HILS1/LCK/LTBP1/SMAD3/MF1/MT1A/NOV/NTF3/PALM/LEF1/CEND1/ANGPT4/PDE4C/PIK3CG/IL20RB/POMC/PPP1CC/PIWIL2/PRMT6/CNOT11/LIMS2/PRKD1/MASP1/PSMB4/METTL14/CCAR2/CCL17/SFRP2/SOX9/TBP/ACTC1/TIMP3/TWIST1/YWHAG/ZNF177/PAX8/FZD5/NLRX1/ZC3H14/RAB11FIP1/COL18A1/SCRT1/HIST1H3A/SLA2/SPINK7/KDM2B/LOXL3/CBX2/GAS7/FADD/LIMD1/H2AFY/ULK2 | 103 |
| GO:0009952 | anterior/posterior pattern specification            | 12/311  | 197/17046  | 0.00028 | 0.01331 | 0.01062 | DMRT2/HOXB3/HOXC5/HOXC6/HOXD3/SMAD3/MEOX1/MEOX2/LEF1/SFRP2/FZD5/KDM2B                                                                                                                                                                                                                                                                                                                                                                                                                                                                                                                                                                | 12  |
| GO:0018130 | heterocycle biosynthetic process                    | 98/311  | 3911/17046 | 0.00029 | 0.01372 | 0.01094 | CDH13/TCIRG1/C1D/ZBTB18/DMRT2/TBR1/NPFFR2/ADCY3/PSIP1/ZBED9/CIDEA/ZFP42/CTGF/ADRB3/ADAL/ZNF709/ZNF781/CITED4/RNF168/DNMT3A/DRD4/EGFR/EGR3/ALAS1/SP8/XRN2/FOXO1/MTOR/GABBR1/AMPD2/DKK3/GLS2/GNAS/GPER1/ZBTB44/GTF2B/BRF1/NME7/NRG1/HLX/HMGA1/HPCA/HOXB3/HOXC5/HOXC6/HOXD3/BARHL2/CYR61/IL6/ISL1/HILS1/SMAD3/ME1/MEF2D/MEOX1/MEOX2/NFYB/NTF3/PALM/LEF1/RIPK4/CYTL1/POMC/BNC2/PRMT6/ZNF532/CNOT11/PRKD1/CCAR2/RPL8/RPL29/SFRP2/SGK1/SOX9/TAF4B/TBP/TCEA1/TLE3/TRAF1/TWIST1/UPOP1/YWHAG/ZNF124/ZNF177/PAX8/FZD5/ZNF606/SCRT1/HIST1H3A/SLA2/KDM2B/LOXL3/CBX2/GAS7/FADD/LIMD1/LDB2/H2AFY                                                   | 98  |
| GO:0006793 | phosphorus metabolic process                        | 76/311  | 2851/17046 | 0.00029 | 0.01373 | 0.01095 | BCKDK/TCIRG1/HGST/NPFFR2/ADCY3/ALPK2/APOA1BP/TRPM6/CTGF/ADRB3/FITM1/ADAL/NLRP6/DRD4/EGFR/EPAH3/EPH4/RASA3/PPM1E/FOXO1/MTOR/GABBR1/GAK/GAPDH/AMPD2/GNAS/PIGW/GPER1/DOK7/GSTP1/NME7/ANXA2/NRG1/HPCA/CYR61/IL6/ISL1/LCK/SMAD3/ME1/MAP3K1/NUDT1/NTF3/PALM/ANGPT4/PDE4C/PDE7A/PGAM2/PIGC/PIK3CG/RIPK4/PON1/LPCAT2/PPP1CC/SMPD3/VAC14/PRKD1/PSMB4/PXN/RASGRF2/CCL17/SFRP2/SGK1/CERK/SOX9/STK10/TNXB/TWIST1/UPOP1/YWHAG/PTP4A1/CXCR4/FZD5/LIMD1/H2AFY/ULK2                                                                                                                                                                                  | 76  |
| GO:0007267 | cell-cell signaling                                 | 38/311  | 1154/17046 | 0.0003  | 0.01373 | 0.01095 | KCNMB2/NPFFR2/ADCY3/CHRNA5/CTGF/ADRB3/DRD4/EGR3/GABBR1/GJA3/GJB2/GLS2/GNAS/GPER1/KCNIP2/APBA2/CYR61/IL6/ISL1/LTB/NOV/NTF3/PDE4C/POMC/SMPD3/SYBU/RASGRF2/CCL17/SFRP2/SOX9/VAMP2/YWHAG/CACNB2/PAX8/FZD5/RAB11FIP1/COLQ/RAB3D                                                                                                                                                                                                                                                                                                                                                                                                           | 38  |
| GO:0002062 | chondrocyte differentiation                         | 8/311   | 93/17046   | 0.0003  | 0.01373 | 0.01095 | COL11A1/CTGF/SMAD3/MEF2D/NOV/CYTL1/SFRP2/SOX9                                                                                                                                                                                                                                                                                                                                                                                                                                                                                                                                                                                        | 8   |
| GO:0014031 | mesenchymal cell development                        | 10/311  | 144/17046  | 0.00031 | 0.01435 | 0.01145 | EPAH3/NRG1/ISL1/SMAD3/LEF1/S100A4/SFRP2/SOX9/TWIST1/LOXL3                                                                                                                                                                                                                                                                                                                                                                                                                                                                                                                                                                            | 10  |
| GO:0012501 | programmed cell death                               | 51/311  | 1718/17046 | 0.00033 | 0.01493 | 0.01191 | C1D/CIDEA/ANKRD9/CTGF/DNMT3A/DSG3/EGFR/EGR3/ACIN1/FOXO1/SL2/GPER1/GSTP1/GZMA/NRG1/ANXA6/CYR61/IL6/ISL1/LCK/SMAD3/MEF2D/MAP3K1/NTF3/ARHGFE3/LEF1/DDX47/ANGPT4/PIK3CG/PLEC/LIMS2/PRKD1/PSMB4/CCAR2/RASGRF2/SFRP2/SGK1/SOX9/STK10/ACTC1/TRAF1/PHLDA2/TWIST1/YWHAG/PAX8/CXCR4/FZD5/COL18A1/KDM2B/FADD/LY86                                                                                                                                                                                                                                                                                                                               | 51  |
| GO:0009790 | embryo development                                  | 33/311  | 958/17046  | 0.00034 | 0.01535 | 0.01224 | ZBTB18/DMRT2/COL11A1/ZFP42/DNMT3A/ECE1/EGFR/SP8/TENM4/GNAS/FLVCR1/NRG1/HLX/APBA2/HOXB3/HOXC5/HOXC6/HOXD3/HSD17B2/CYR61/ISL1/RESP18/SMAD3/MEOX1/MEOX2/LEF1/SFRP2/SOX9/PHLDA2/TWIST1/PAX8/FZD5/KDM2B                                                                                                                                                                                                                                                                                                                                                                                                                                   | 33  |
| GO:0016049 | cell growth                                         | 19/311  | 429/17046  | 0.00036 | 0.01574 | 0.01255 | CDH13/CTGF/XRN2/SPG20/MTOR/NRG1/BARHL2/CYR61/IL6/SMAD3/NOV/LEF1/PRMT6/BIN3/CCAR2/SFRP2/SGK1/SOX9/ULK2                                                                                                                                                                                                                                                                                                                                                                                                                                                                                                                                | 19  |
| GO:0010646 | regulation of cell communication                    | 73/311  | 2731/17046 | 0.00037 | 0.0158  | 0.0126  | CDH3/TSPAN5/CDH13/HGST/NPFFR2/CIDEA/APCDD1/CTGF/ADRB3/NLRP6/DRD4/EGFR/RASA3/FOXO1/SPG20/LARP1/MTOR/RGS22/DKK3/GNAS/GPER1/GSTP1/ANXA2/NRG1/CYR61/IL6/ISL1/LCK/LLGL1/LTBP1/SMAD3/MAP3K1/NOV/NTF3/PALM/ARHGFE3/LEF1/PDE4C/PIK3CG/POMC/ZDHHC13/PPP1CC/ARHGFE10L/SYBU/LIMS2/PRKD1/PSMB4/CCAR2/PXN/RASGRF2/S100A4/CCL17/SFRP2/SOX9/VAMP2/TLR5/TNXB/TRAF1/TWIST1/YWHAG/PAX8/CXCR4/FZD5/TMEM204/NLRX1/RAB11FIP1/SLA2/FADD/LIMD1/ARHGAP29/LY86/ARHGFE10/TELO2                                                                                                                                                                                 | 73  |

|            |                                                                                                   |         |            |         |         |         |                                                                                                                                                                                                                                                                                                                                                                                                                                                                                                                                                                                                                                                                                                                                                                                                                                                                                                                                                                                                                                                                    |     |
|------------|---------------------------------------------------------------------------------------------------|---------|------------|---------|---------|---------|--------------------------------------------------------------------------------------------------------------------------------------------------------------------------------------------------------------------------------------------------------------------------------------------------------------------------------------------------------------------------------------------------------------------------------------------------------------------------------------------------------------------------------------------------------------------------------------------------------------------------------------------------------------------------------------------------------------------------------------------------------------------------------------------------------------------------------------------------------------------------------------------------------------------------------------------------------------------------------------------------------------------------------------------------------------------|-----|
| GO:1903035 | negative regulation of response to wounding                                                       | 10/311  | 147/17046  | 0.00037 | 0.0158  | 0.0126  | NLRP6/GPER1/GSTP1/ANXA2/ISL1/SMAD3/NOV/IL20RB/PSMB4/NLRX1                                                                                                                                                                                                                                                                                                                                                                                                                                                                                                                                                                                                                                                                                                                                                                                                                                                                                                                                                                                                          | 10  |
| GO:0071840 | cellular component organization or biogenesis                                                     | 133/311 | 5713/17046 | 0.00038 | 0.0158  | 0.0126  | CDH3/TSPAN5/CDH13/TCIRG1/C1D/TBR1/SEPT9/ADCY3/PSIP1/B4GALT7/CIDEA/FRMD6/APOA1BP/COL11A1/SCLT1/ZFP42/CTGF/FITM1/WBP2NL/RNF168/COCH/DNMT3A/DSG3/EGFR/PATL2/TMEM17/EML1/UNC13D/EPHA3/EPHB4/ALAS1/RASA3/PPM1E/ACIN1/LIMCH1/SPG20/FLNB/ATP11A/MTOR/TENM4/GJB2/GLS2/VP54A/PIGW/IZUMO1/GPER1/NME7/ANXA2/KCNIP2/NRG1/ANXA6/HMGA1/HPCA/ACADL/HSP90AA1/COL28A1/FMN1/BARHL2/CYR61/IL6/ISL1/HILS1/ATP9B/ACAT1/KRT15/INSC/LLGL1/LOX/LTBP1/SMAD3/ME1/MAP3K1/MF12/NEDD9/NOV/NTF3/PALM/LEF1/DDX47/ANGPT4/PLEC/LPCAT2/PIWIL2/PRMT6/LIMS2/PRKD1/BIN3/PSMB4/TRPC7/ACTR3B/CCAR2/PXN/RASGRF2/EXOC4/RPL8/RPL29/S100A4/S100A6/SFRP2/SGK1/MICAL1/SOX9/VAMP2/ACTC1/TNXB/TRAF1/TRPC4/TWIST1/YWHAG/CACNB2/PAX8/CXCR4/FZD5/COL18A1/CAPS/COLQ/HIST1H2BM/SH3BGR3/HIST1H3A/PARD6B/KDM2B/LOXL3/MGARP/CBX2/GAS7/FADD/LIMD1/MAP7/LDB2/H2AFY/ARHGEF10/ULK2/USP6NL                                                                                                                                                                                                                                     | 133 |
| GO:0008219 | cell death                                                                                        | 53/311  | 1816/17046 | 0.00038 | 0.0158  | 0.0126  | C1D/CIDEA/ANKRD9/CTGF/DNMT3A/DSG3/EGFR/EGR3/ACIN1/FOXO1/GLS2/GPER1/GSTP1/GZMA/NRG1/ANXA6/CYR61/IL6/ISL1/LCK/SMAD3/MEF2D/MAP3K1/MEOX2/NOV/NTF3/ARHGEF3/LEF1/DDX47/ANGPT4/PIK3CG/PLEC/LIMS2/PRKD1/PSMB4/CCAR2/RASGRF2/SFRP2/SGK1/SOX9/STK10/ACTC1/TRAF1/PHLDA2/TWIST1/YWHAG/PAX8/CXCR4/FZD5/COL18A1/KDM2B/FADD/LY86                                                                                                                                                                                                                                                                                                                                                                                                                                                                                                                                                                                                                                                                                                                                                  | 53  |
| GO:0016265 | death                                                                                             | 53/311  | 1816/17046 | 0.00038 | 0.0158  | 0.0126  | C1D/CIDEA/ANKRD9/CTGF/DNMT3A/DSG3/EGFR/EGR3/ACIN1/FOXO1/GLS2/GPER1/GSTP1/GZMA/NRG1/ANXA6/CYR61/IL6/ISL1/LCK/SMAD3/MEF2D/MAP3K1/MEOX2/NOV/NTF3/ARHGEF3/LEF1/DDX47/ANGPT4/PIK3CG/PLEC/LIMS2/PRKD1/PSMB4/CCAR2/RASGRF2/SFRP2/SGK1/SOX9/STK10/ACTC1/TRAF1/PHLDA2/TWIST1/YWHAG/PAX8/CXCR4/FZD5/COL18A1/KDM2B/FADD/LY86                                                                                                                                                                                                                                                                                                                                                                                                                                                                                                                                                                                                                                                                                                                                                  | 53  |
| GO:0048864 | stem cell development                                                                             | 10/311  | 148/17046  | 0.00039 | 0.01631 | 0.013   | EPHA3/NRG1/ISL1/SMAD3/LEF1/S100A4/SFRP2/SOX9/TWIST1/LOXL3                                                                                                                                                                                                                                                                                                                                                                                                                                                                                                                                                                                                                                                                                                                                                                                                                                                                                                                                                                                                          | 10  |
| GO:0050896 | response to stimulus                                                                              | 169/311 | 7634/17046 | 0.0004  | 0.01654 | 0.01319 | CDH3/TSPAN5/CDH13/KCNMB2/TCIRG1/TBR1/HCTST/NPFFR2/ADCY3/PSIP1/PTH2/CHRNA5/CIDEA/COL11A1/TRPM6/APCDD1/CTGF/ADRB3/TRPV3/CITED4/RNF168/COCH/NLRP6/DNMT3A/DRD4/EGFR/EGR3/TMEM17/UNC13D/EPHA3/EPHB4/RASA3/PPM1E/VASH1/ACIN1/FOXO1/SPG20/FLNB/LARP1/MTOR/GABBR1/TENM4/RGS22/FBXO2/GJA3/GJB2/SDCBP2/DKK3/GPR162/GNAS/GPER1/GSTP1/NME7/GZMA/ANXA2/SERPIND1/KCNIP2/NRG1/ANXA6/HLA-B/HLA-E/HLA-F/HLX/HMGA1/HPCA/HOXD3/HSD17B2/HSP90AA1/HTRA5/CYR61/IL6/ISL1/ACAT1/KRT15/LCK/LLGL1/LOX/LTB/LTBP1/SMAD3/ME1/MAP3K1/MT1A/NUDT1/NEDD9/NMBR/NOV/NTF3/PALM/ARHGEF3/LEF1/DDX47/ANGPT4/PDE4C/PDE7A/PGAM2/PIK3CG/IL20RB/CYTL1/POMC/PON1/ZDHHC13/PPP1CC/ARHGEF10L/PRMT6/WDR33/SYBU/LIMS2/VAC14/PRKD1/BIN3/MASP1/PSMB4/TRPC7/LPAR5/CCAR2/PTPRCAP/PXN/RASGRF2/DEFB134/S100A4/S100A6/CCL17/SFRP2/CXCR5/SGK1/SYNDIG1L/MICAL1/SOX9/STK10/VAMP2/TCEA1/ACTC1/TIMP3/TLE3/TLR5/TNXB/TRAF1/TRPC4/TWIST1/UPP1/YWHAG/CACNB2/PAX8/CXCR4/FZD5/TMEM204/NLRX1/COL18A1/UNC93B1/CAPS/HIST1H3A/SLA2/IL1F10/MGARP/FA2H/LIMD1/MAP7/ZFAND2A/RCS1/IL32/ARHGAP29/LY86/RAB3D/SMAD5-AS1/MTLS/ARHGEF10/ULK2/TELO2 | 169 |
| GO:0070838 | divalent metal ion transport                                                                      | 18/311  | 399/17046  | 0.00041 | 0.01655 | 0.0132  | CLCA1/C15orf27/TRPM6/CTGF/TRPV3/DRD4/RASA3/CRACR2B/GPER1/ANXA6/LCK/PIK3CG/ZDHHC13/PRKD1/TRPC7/TRPC4/CACNB2/SMAD1                                                                                                                                                                                                                                                                                                                                                                                                                                                                                                                                                                                                                                                                                                                                                                                                                                                                                                                                                   | 18  |
| GO:0040007 | growth                                                                                            | 31/311  | 887/17046  | 0.00041 | 0.01655 | 0.0132  | CDH13/CTGF/ADRB3/XRN2/SPG20/MTOR/TENM4/GNAS/FLVCR1/NRG1/HLX/APBA2/FMN1/BARHL2/CYR61/IL6/SMAD3/MT1A/NEDD9/NOV/LEF1/BNC2/PRMT6/BIN3/CCAR2/SFRP2/SGK1/SOX9/TIMP3/COLQ/ULK2                                                                                                                                                                                                                                                                                                                                                                                                                                                                                                                                                                                                                                                                                                                                                                                                                                                                                            | 31  |
| GO:0006171 | cAMP biosynthetic process                                                                         | 9/311   | 123/17046  | 0.00043 | 0.01706 | 0.0136  | NPFFR2/ADCY3/ADRB3/DRD4/GABBR1/GNAS/GPER1/HPCA/PALM                                                                                                                                                                                                                                                                                                                                                                                                                                                                                                                                                                                                                                                                                                                                                                                                                                                                                                                                                                                                                | 9   |
| GO:0072511 | divalent inorganic cation transport                                                               | 18/311  | 402/17046  | 0.00045 | 0.01769 | 0.01411 | CLCA1/C15orf27/TRPM6/CTGF/TRPV3/DRD4/RASA3/CRACR2B/GPER1/ANXA6/LCK/PIK3CG/ZDHHC13/PRKD1/TRPC7/TRPC4/CACNB2/SMAD1                                                                                                                                                                                                                                                                                                                                                                                                                                                                                                                                                                                                                                                                                                                                                                                                                                                                                                                                                   | 18  |
| GO:0002480 | antigen processing and presentation of exogenous peptide antigen via MHC class I, TAP-independent | 3/311   | 9/17046    | 0.00047 | 0.01814 | 0.01447 | HLA-B/HLA-E/HLA-F                                                                                                                                                                                                                                                                                                                                                                                                                                                                                                                                                                                                                                                                                                                                                                                                                                                                                                                                                                                                                                                  | 3   |
| GO:0002862 | negative regulation of inflammatory response to antigenic stimulus                                | 3/311   | 9/17046    | 0.00047 | 0.01814 | 0.01447 | NLRP6/IL20RB/PSMB4                                                                                                                                                                                                                                                                                                                                                                                                                                                                                                                                                                                                                                                                                                                                                                                                                                                                                                                                                                                                                                                 | 3   |

|            |                                            |         |            |         |         |         |                                                                                                                                                                                                                                                                                                                                                                                                                                                                                                                                                                                                                                                                                                                                                                                                                  |     |
|------------|--------------------------------------------|---------|------------|---------|---------|---------|------------------------------------------------------------------------------------------------------------------------------------------------------------------------------------------------------------------------------------------------------------------------------------------------------------------------------------------------------------------------------------------------------------------------------------------------------------------------------------------------------------------------------------------------------------------------------------------------------------------------------------------------------------------------------------------------------------------------------------------------------------------------------------------------------------------|-----|
| GO:0019220 | regulation of phosphate metabolic process  | 47/311  | 1568/17046 | 0.00047 | 0.01823 | 0.01454 | NPFRR2/ADCY3/CTGF/ADRB3/NLRP6/DRD4/EGFR/RASA3/PPM1E/FOXO1/MTOR/GABBR1/GAPDHS/GNAS/GPER1/DOK7/GSTP1/ANXA2/NRG1/HPCA/CYR61/IL6/ISL1/LCK/SMAD3/ME1/MAP3K1/NTF3/PALM/ANGPT4/PGAM2/PIK3CG/VAC14/PRKD1/PSMB4/PXN/RASGRF2/CCL17/SFRP2/SOX9/STK10/TNXB/TWIST1/YWHAG/CXCR4/FZD5/H2AFY                                                                                                                                                                                                                                                                                                                                                                                                                                                                                                                                     | 47  |
| GO:0052652 | cyclic purine nucleotide metabolic process | 10/311  | 152/17046  | 0.00048 | 0.01838 | 0.01466 | NPFRR2/ADCY3/ADRB3/DRD4/GABBR1/AMPD2/GNAS/GPER1/HPCA/PALM                                                                                                                                                                                                                                                                                                                                                                                                                                                                                                                                                                                                                                                                                                                                                        | 10  |
| GO:0001837 | epithelial to mesenchymal transition       | 8/311   | 100/17046  | 0.00049 | 0.01838 | 0.01466 | EPHA3/SMAD3/LEF1/S100A4/SFRP2/SOX9/TWIST1/LOXL3                                                                                                                                                                                                                                                                                                                                                                                                                                                                                                                                                                                                                                                                                                                                                                  | 8   |
| GO:0048583 | regulation of response to stimulus         | 84/311  | 3283/17046 | 0.00049 | 0.01838 | 0.01466 | CDH3/TSPAN5/CDH13/TBR1/HCST/NPFRR2/CIDEA/APCDD1/CTGF/ADRB3/RNF168/COCH/NLRP6/DRD4/EGFR/UNC13D/RASA3/VASH1/ACIN1/FOXO1/SPG20/LARP1/MTOR/RGS22/DKK3/GNAS/GPER1/GSTP1/ANXA2/NRG1/HLA-B/HLA-E/HLA-F/HLX/HMGA1/HSP90AA1/CYR61/IL6/ISL1/LCK/LLGL1/LTBP1/SMAD3/MAP3K1/NOV/NTF3/PALM/ARHGEF3/LEF1/PIK3CG/IL20RB/ZDHH13/PPP1CC/ARHGEF10L/SYBU/LIMS2/PRKD1/MASP1/PSMB4/CCAR2/PXN/RASGRF2/S100A4/CCL17/SFRP2/SOX9/TLR5/TNXB/TRAFF1/TWIST1/YWHAG/CXCR4/FZD5/TMEM204/NLRX1/UNC93B1/HIST1H3A/SLA2/FADD/LIMD1/ARHGAP29/LY86/ARHGEF10/TELO2                                                                                                                                                                                                                                                                                      | 84  |
| GO:0019932 | second-messenger-mediated signaling        | 12/311  | 210/17046  | 0.00049 | 0.01838 | 0.01466 | CDH13/ADCY3/DRD4/EGFR/GNAS/NRG1/HPCA/HTR5A/PDE7A/SOX9/CXCR4/SLA2                                                                                                                                                                                                                                                                                                                                                                                                                                                                                                                                                                                                                                                                                                                                                 | 12  |
| GO:0016043 | cellular component organization            | 130/311 | 5594/17046 | 0.00051 | 0.01865 | 0.01487 | CDH3/TSPAN5/CDH13/TCIRG1/TBR1/SEPT9/ADCY3/PSIP1/B4GALT7/CIDEA/FRMD6/APOA1BP/COL11A1/SCLT1/ZFP42/CTGF/FITM1/WBP2NL/RNF168/COCH/DNMT3A/DSG3/EGFR/PATL2/TMEM17/EML1/UNC13D/EPHA3/EPHB4/ALAS1/RASA3/PPM1E/ACIN1/LIMCH1/SPG20/FLNB/ATP11A/MTOR/TENM4/GJB2/GLS2/VPS4A/PIGW/IZUMO1/GPER1/NME7/ANXA2/KCNIP2/NRG1/ANXA6/HMGA1/HPCA/ACADL/HSP90AA1/COL28A1/FMN1/BARHL2/CYR61/IL6/ISL1/HILS1/ATP9B/ACAT1/KRT15/INSC/LLGL1/LOX/LTBP1/SMAD3/ME1/MAP3K1/MFI2/NEDD9/NOV/NTF3/PALM/LEF1/ANGPT4/PLEC/LPCAT2/PIWIL2/PRMT6/LIMS2/PRKD1/BIN3/PSMB4/TRPC7/ACTR3B/CCAR2/PXN/RASGRF2/EXOC4/RPL8/RPL29/S100A4/S100A6/SFRP2/SGK1/MICAL1/SOX9/VAMP2/ACTC1/TNXB/TRAFF1/TRPC4/TWIST1/YWHAG/CACNB2/PAX8/CXCR4/FZD5/COL18A1/CAPS/COLQ/HIST1H2BM/SH3BGL3/HIST1H3A/PARD6B/KDM2B/LOXL3/MGARP/CBX2/GAS7/FADD/LIMD1/MAP7/H2AFY/ARHGEF10/ULK2/USP6NL | 130 |
| GO:0009190 | cyclic nucleotide biosynthetic process     | 10/311  | 153/17046  | 0.00051 | 0.01865 | 0.01487 | NPFRR2/ADCY3/ADRB3/DRD4/GABBR1/AMPD2/GNAS/GPER1/HPCA/PALM                                                                                                                                                                                                                                                                                                                                                                                                                                                                                                                                                                                                                                                                                                                                                        | 10  |
| GO:0006468 | protein phosphorylation                    | 49/311  | 1662/17046 | 0.00051 | 0.01865 | 0.01487 | BCKDK/HCST/NPFRR2/ADCY3/ALPK2/TRPM6/CTGF/ADRB3/NLRP6/DRD4/EGFR/EPHA3/EPHB4/RASA3/PPM1E/FOXO1/MTOR/GAK/GPER1/DOK7/GSTP1/ANXA2/NRG1/CYR61/IL6/ISL1/LCK/SMAD3/MAP3K1/NTF3/ANGPT4/PIK3CG/RIPK4/PRKD1/PSMB4/PXN/RASGRF2/CCL17/SFRP2/SGK1/SOX9/STK10/TNXB/TWIST1/YWHAG/CXCR4/FZD5/H2AFY/ULK2                                                                                                                                                                                                                                                                                                                                                                                                                                                                                                                           | 49  |
| GO:0051174 | regulation of phosphorus metabolic process | 47/311  | 1579/17046 | 0.00055 | 0.01981 | 0.0158  | NPFRR2/ADCY3/CTGF/ADRB3/NLRP6/DRD4/EGFR/RASA3/PPM1E/FOXO1/MTOR/GABBR1/GAPDHS/GNAS/GPER1/DOK7/GSTP1/ANXA2/NRG1/HPCA/CYR61/IL6/ISL1/LCK/SMAD3/ME1/MAP3K1/NTF3/PALM/ANGPT4/PGAM2/PIK3CG/VAC14/PRKD1/PSMB4/PXN/RASGRF2/CCL17/SFRP2/SOX9/STK10/TNXB/TWIST1/YWHAG/CXCR4/FZD5/H2AFY                                                                                                                                                                                                                                                                                                                                                                                                                                                                                                                                     | 47  |
| GO:0044093 | positive regulation of molecular function  | 49/311  | 1672/17046 | 0.00059 | 0.02091 | 0.01668 | CDH3/ADCY3/CTGF/ADRB3/DRD4/EGFR/RASA3/TBC1D9B/RGS22/GNAS/GPER1/DOK7/ANXA2/NRG1/HPCA/CYR61/IL6/ISL1/LCK/LLGL1/SMAD3/MAP3K1/NTF3/ARHGEF3/ANGPT4/PIK3CG/RIPK4/CYTL1/PON1/ARHGEF10L/PRKD1/PSMB4/PXN/RASGRF2/CCL17/SFRP2/SGK1/STK10/TCEA1/TRAFF1/TWIST1/CXCR4/FZD5/SH3BGL3/FADD/ARHGAP29/ARHGEF10/USP6NL/RABGAP1L                                                                                                                                                                                                                                                                                                                                                                                                                                                                                                     | 49  |
| GO:0048762 | mesenchymal cell differentiation           | 10/311  | 156/17046  | 0.00059 | 0.02091 | 0.01668 | EPHA3/NRG1/ISL1/SMAD3/LEF1/S100A4/SFRP2/SOX9/TWIST1/LOXL3                                                                                                                                                                                                                                                                                                                                                                                                                                                                                                                                                                                                                                                                                                                                                        | 10  |
| GO:0009628 | response to abiotic stimulus               | 35/311  | 1071/17046 | 0.0006  | 0.02091 | 0.01668 | NPFRR2/PSIP1/COL11A1/CTGF/ADRB3/TRPV3/RNF168/DNMT3A/DRD4/EGFR/FOXO1/MTOR/GJA3/HPCA/HSP90AA1/IL6/LCK/SMAD3/MAP3K1/PALM/ANGPT4/PPP1CC/CCAR2/SFRP2/SOX9/TIMP3/TLR5/TWIST1/CXCR4/COL18A1/MGARP/FADD/LIMD1/MAP7/RCS1                                                                                                                                                                                                                                                                                                                                                                                                                                                                                                                                                                                                  | 35  |
| GO:0022008 | neurogenesis                               | 46/311  | 1548/17046 | 0.00066 | 0.02289 | 0.01825 | ZBTB18/TBR1/SCLT1/APCDD1/DNMT3A/EGFR/EML1/EPHA3/EPHB4/RASA3/SPG20/TENM4/GPER1/KCNIP2/NRG1/HOXB3/HOXD3/HSP90AA1/FMN1/BARHL2/IL6/ISL1/LLGL1/NTF3/PALM/LEF1/CEND1/PPP1CC/PRKD1/PSMB4/TRPC7/RASGRF2/S100A6/SGK1/SOX9/TRPC4/TWIST1/YWHAG/CACNB2/CXCR4/FZD5/SCRT1/PARD6B/GAS7/ARHGEF10/ULK2                                                                                                                                                                                                                                                                                                                                                                                                                                                                                                                            | 46  |
| GO:0045667 | regulation of osteoblast differentiation   | 8/311   | 105/17046  | 0.00068 | 0.02304 | 0.01838 | GNAS/CYR61/IL6/SMAD3/PRKD1/SFRP2/TWIST1/LIMD1                                                                                                                                                                                                                                                                                                                                                                                                                                                                                                                                                                                                                                                                                                                                                                    | 8   |

|            |                                                                                                                           |         |            |         |         |         |                                                                                                                                                                                                                                                                                                                                                                                                                                                                                                                                                                                                                                 |     |
|------------|---------------------------------------------------------------------------------------------------------------------------|---------|------------|---------|---------|---------|---------------------------------------------------------------------------------------------------------------------------------------------------------------------------------------------------------------------------------------------------------------------------------------------------------------------------------------------------------------------------------------------------------------------------------------------------------------------------------------------------------------------------------------------------------------------------------------------------------------------------------|-----|
| GO:0030199 | collagen fibril organization                                                                                              | 5/311   | 39/17046   | 0.00068 | 0.02304 | 0.01838 | COL11A1/ANXA2/LOX/SFRP2/TNXB                                                                                                                                                                                                                                                                                                                                                                                                                                                                                                                                                                                                    | 5   |
| GO:0051496 | positive regulation of stress fiber assembly                                                                              | 5/311   | 39/17046   | 0.00068 | 0.02304 | 0.01838 | CTGF/PPM1E/MTOR/SMAD3/ARHGGEF10                                                                                                                                                                                                                                                                                                                                                                                                                                                                                                                                                                                                 | 5   |
| GO:0050793 | regulation of developmental process                                                                                       | 55/311  | 1953/17046 | 0.00068 | 0.02304 | 0.01838 | CDH3/DMRT2/TBR1/CTGF/ADRB3/COCH/EGR3/UNC13D/EPHA3/VASH1/ACIN1/FOXO1/SPG20/MTOR/TENM4/GNAS/GPER1/FLVCR1/NRG1/HLA-B/HLX/HMGA1/HOXB3/HOXD3/BARHL2/CYR61/IL6/ISL1/LCK/SMAD3/MFI2/NOV/NTF3/PALM/LEF1/CEND1/ANGPT4/LIMS2/PRKD1/PXN/CCL17/SFRP2/SOX9/PHLDA2/TWIST1/YW                                                                                                                                                                                                                                                                                                                                                                  | 55  |
| GO:0010638 | positive regulation of organelle organization                                                                             | 20/311  | 489/17046  | 0.00069 | 0.02304 | 0.01838 | CTGF/PPM1E/MTOR/GLS2/VPS4A/GPER1/ANXA2/NRG1/FMN1/ISL1/SMAD3/MAP3K1/NTF3/PIWIL2/PRKD1/ACTR3B/YWHAG/FZD5/MGARP/ARHGGEF10                                                                                                                                                                                                                                                                                                                                                                                                                                                                                                          | 20  |
| GO:0035270 | endocrine system development                                                                                              | 9/311   | 132/17046  | 0.00071 | 0.02357 | 0.0188  | FOXO1/DKK3/HOXB3/HOXD3/IL6/ISL1/SMAD3/SOX9/PAX8                                                                                                                                                                                                                                                                                                                                                                                                                                                                                                                                                                                 | 9   |
| GO:0051336 | regulation of hydrolase activity                                                                                          | 37/311  | 1166/17046 | 0.00071 | 0.02357 | 0.0188  | ADCY3/CTGF/EGFR/EPHA3/RASA3/TBC1D9B/MTOR/RGS22/GNAS/GPER1/GZMA/SERPIND1/HPCA/COL28A1/CYR61/IL6/ITIH3/LCK/LLGL1/SMAD3/NTF3/ARHGGEF3/LEF1/ARHGGEF10/L/PRKD1/RASGRF2/CCL17/SFRP2/TCEA1/TIMP3/SH3BGL3/SPINK7/FADD/ARHGAP29/ARHGGEF10/USP6NL/RABGAP1L                                                                                                                                                                                                                                                                                                                                                                                | 37  |
| GO:0044271 | cellular nitrogen compound biosynthetic process                                                                           | 105/311 | 4363/17046 | 0.00073 | 0.02391 | 0.01907 | CDH13/TCIRG1/C1D/ZBTB18/DMRT2/TBR1/NPFFR2/ADCY3/PSIP1/ZBED9/CIDEA/ZFP42/CTGF/ADRB3/ADAL/ZNF709/ZNF781/CITED4/RNF168/DNMT3A/DRD4/EGFR/EGR3/PATL2/ALAS1/SP8/XRN2/FOXO1/LARP1/MTOR/GABBR1/AMPD2/DKK3/GLS2/GNAS/GPER1/ZBTB44/GTF2B/BRF1/NME7/NRG1/HLX/HMGA1/HPCA/HOXB3/HOXC5/HOXC6/HOXD3/HSP90AA1/BARHL2/CYR61/IL6/ISL1/HILS1/SMAD3/ME1/MEF2D/MEOX1/MEOX2/NFYB/NTF3/PALM/LEF1/RIPK4/CYTL1/POMC/BNC2/PIWIL2/PRMT6/ZNF532/CNOT11/PRKD1/METTL14/CCAR2/RPL8/RPL29/SFRP2/SGK1/SOX9/TAF4B/TBP/TCEA1/TLE3/TLR5/TRAF1/TWIST1/UPP1/VARS/YWHAG/ZNF124/ZNF177/PAX8/FZD5/ZNF606/SCRT1/HIST1H3A/SLA2/KDM2B/LOXL3/CBX2/GAS7/FADD/LIMD1/LDB2/H2AFY | 105 |
| GO:0009260 | ribonucleotide biosynthetic process                                                                                       | 13/311  | 251/17046  | 0.00074 | 0.02391 | 0.01907 | TCIRG1/NPFFR2/ADCY3/ADRB3/DRD4/GABBR1/AMPD2/GNAS/GPER1/NME7/HPCA/PALM/UPP1                                                                                                                                                                                                                                                                                                                                                                                                                                                                                                                                                      | 13  |
| GO:0048699 | generation of neurons                                                                                                     | 44/311  | 1471/17046 | 0.00076 | 0.0244  | 0.01946 | ZBTB18/TBR1/SCLT1/DNMT3A/EGFR/EML1/EPHA3/EPHB4/RASA3/SPG20/TENM4/GPER1/KCNIP2/NRG1/HOXB3/HOXD3/HSP90AA1/FMN1/BARHL2/IL6/ISL1/LLGL1/NTF3/PALM/LEF1/CEND1/PPP1CC/PRKD1/PSMB4/TRPC7/RASGRF2/S100A6/SGK1/SOX9/TRPC4/TWIST1/YWHAG/CACNB2/CXCR4/FZD5/SCRT1/PARD6B/GAS7/ULK2                                                                                                                                                                                                                                                                                                                                                           | 44  |
| GO:0042325 | regulation of phosphorylation                                                                                             | 41/311  | 1341/17046 | 0.00076 | 0.0244  | 0.01946 | NPFFR2/ADCY3/CTGF/ADRB3/NLRP6/DRD4/EGFR/RASA3/PPM1E/FOXO1/MTOR/GAPDHS/GPER1/DOK7/GSTP1/ANXA2/NRG1/CYR61/IL6/ISL1/LCK/SMAD3/MAP3K1/NTF3/ANGPT4/PIK3CG/VAC14/PRKD1/PSMB4/PXN/RASGRF2/CCL17/SFRP2/SOX9/STK10/TNXB/TWIST1/YWHAG/CXCR4/FZD5/H2AFY                                                                                                                                                                                                                                                                                                                                                                                    | 41  |
| GO:0016310 | phosphorylation                                                                                                           | 55/311  | 1964/17046 | 0.00078 | 0.02474 | 0.01973 | BCKDK/HCST/NPFFR2/ADCY3/ALPK2/TRPM6/CTGF/ADRB3/NLRP6/DRD4/EGFR/EPHA3/EPHB4/RASA3/PPM1E/FOXO1/MTOR/GAK/GAPDHS/GPER1/DOK7/GSTP1/NME7/ANXA2/NRG1/CYR61/IL6/ISL1/LCK/SMAD3/MAP3K1/NTF3/ANGPT4/PGAM2/PIK3CG/RIPK4/VAC14/PRKD1/PSMB4/PXN/RASGRF2/CCL17/SFRP2/SGK1/CERK/SOX9/STK10/TNXB/TWIST1/YW                                                                                                                                                                                                                                                                                                                                      | 55  |
| GO:0002460 | adaptive immune response based on somatic recombination of immune receptors built from immunoglobulin superfamily domains | 11/311  | 191/17046  | 0.00079 | 0.02474 | 0.01973 | RNF168/UNC13D/HLA-B/HLA-E/HLX/IL6/LEF1/IL20RB/FZD5/SLA2/FADD                                                                                                                                                                                                                                                                                                                                                                                                                                                                                                                                                                    | 11  |
| GO:0046390 | ribose phosphate biosynthetic process                                                                                     | 13/311  | 253/17046  | 0.00079 | 0.02474 | 0.01973 | TCIRG1/NPFFR2/ADCY3/ADRB3/DRD4/GABBR1/AMPD2/GNAS/GPER1/NME7/HPCA/PALM/UPP1                                                                                                                                                                                                                                                                                                                                                                                                                                                                                                                                                      | 13  |

|            |                                                    |         |            |         |         |         |                                                                                                                                                                                                                                                                                                                                                                                                                                                                                                                                                                                                                                                                                                                                                                                                               |     |
|------------|----------------------------------------------------|---------|------------|---------|---------|---------|---------------------------------------------------------------------------------------------------------------------------------------------------------------------------------------------------------------------------------------------------------------------------------------------------------------------------------------------------------------------------------------------------------------------------------------------------------------------------------------------------------------------------------------------------------------------------------------------------------------------------------------------------------------------------------------------------------------------------------------------------------------------------------------------------------------|-----|
| GO:0001932 | regulation of protein phosphorylation              | 39/311  | 1258/17046 | 0.0008  | 0.02474 | 0.01973 | NPFRR2/ADCY3/CTGF/ADRB3/NLRP6/DRD4/EGFR/RASA3/PPM1E/FOXO1/MTOR/GPER1/DOK7/GSTP1/ANXA2/NRG1/CYR61/IL6/ISL1/LCK/SMAD3/MAP3K1/NTF3/ANGPT4/PIK3CG/PRKD1/PSMB4/PXN/RASGRF2/CCL17/SFRP2/SOX9/STK10/TNXB/TWIST1/YWHAG/CXCR4/FZD5/H2AFY                                                                                                                                                                                                                                                                                                                                                                                                                                                                                                                                                                               | 39  |
| GO:0007389 | pattern specification process                      | 18/311  | 423/17046  | 0.00081 | 0.02486 | 0.01982 | DMRT2/TBR1/SP8/NME7/HOXB3/HOXC5/HOXC6/HOXD3/ISL1/SMAD3/MEOX1/MEOX2/LEF1/SFRP2/TRA2B/PAX8/FZD5/KDM2B                                                                                                                                                                                                                                                                                                                                                                                                                                                                                                                                                                                                                                                                                                           | 18  |
| GO:0009887 | organ morphogenesis                                | 30/311  | 884/17046  | 0.00082 | 0.02501 | 0.01994 | TBR1/COL11A1/CTGF/EGFR/EPHB4/GNAS/FLVCR1/NRG1/HLX/HOXB3/HOXD3/FMN1/CYR61/IL6/ISL1/SMAD3/MEF2D/LEF1/BNC2/LIMS2/SFRP2/SOX9/ACTC1/TLE3/PHLDA2/TWIST1/PAX8/FZD5/COL18A1/KDM2B                                                                                                                                                                                                                                                                                                                                                                                                                                                                                                                                                                                                                                     | 30  |
| GO:0085029 | extracellular matrix assembly                      | 4/311   | 24/17046   | 0.00087 | 0.02631 | 0.02098 | LOX/SMAD3/SOX9/TNXB                                                                                                                                                                                                                                                                                                                                                                                                                                                                                                                                                                                                                                                                                                                                                                                           | 4   |
| GO:0010941 | regulation of cell death                           | 42/311  | 1395/17046 | 0.00089 | 0.02668 | 0.02128 | CIDEA/ANKRD9/CTGF/DNMT3A/EGFR/EGR3/ACIN1/FOXO1/GLS2/GPER1/GSTP1/GZMA/NRG1/CYR61/IL6/ISL1/LCK/SMAD3/MAP3K1/NOV/NTF3/ARHGEF3/LEF1/ANGPT4/PIK3CG/LIMS2/PRKD1/PSMB4/CCAR2/RASGRF2/SFRP2/SGK1/SOX9/STK10/ACTC1/TRAF1/TWIST1/YWHAG/PAX8/COL18A1/KDM2B/FADD                                                                                                                                                                                                                                                                                                                                                                                                                                                                                                                                                          | 42  |
| GO:0035413 | positive regulation of catenin import into nucleus | 3/311   | 11/17046   | 0.00089 | 0.02668 | 0.02128 | EGFR/SMAD3/SFRP2                                                                                                                                                                                                                                                                                                                                                                                                                                                                                                                                                                                                                                                                                                                                                                                              | 3   |
| GO:0045595 | regulation of cell differentiation                 | 41/311  | 1356/17046 | 0.00095 | 0.02819 | 0.02248 | TBR1/CTGF/EGR3/UNC13D/EPHA3/ACIN1/FOXO1/SPG20/MTOR/TENM4/GNAS/GPER1/NRG1/HLA-B/HLX/HOXB3/HOXD3/BARHL2/CYR61/IL6/ISL1/LCK/SMAD3/MFI2/NOV/NTF3/PALM/LEF1/PRKD1/CCL17/SFRP2/SOX9/TWIST1/YWHAG/PAX8/CXCR4/SCRT1/FADD/LIMD1/H2AFY/ULK2                                                                                                                                                                                                                                                                                                                                                                                                                                                                                                                                                                             | 41  |
| GO:0044700 | single organism signaling                          | 129/311 | 5624/17046 | 0.00096 | 0.02844 | 0.02268 | CDH3/TSPAN5/CDH13/KCNMB2/TCIRG1/HCST/NPFRR2/ADCY3/PTH2/CHRNA5/CIDEA/APCDD1/CTGF/ADRB3/NLRP6/DRD4/ECE1/EGFR/EGR3/TMEM17/EPHA3/EPHB4/RASA3/FOXO1/SPG20/FLNB/LARP1/MTOR/GABBR1/TENM4/RGS22/GJA3/GJB2/SDCBP2/DKK3/GLS2/GPR162/GNAS/GPER1/GSTP1/NME7/ANXA2/KCNIP2/NRG1/ANXA6/HLA-B/HLA-E/HLA-F/HPCA/APBA2/HOXD3/HSP90AA1/HTR5A/CYR61/IL6/ISL1/LCK/LLGL1/LTB/LTBP1/SMAD3/MAP3K1/NEDD9/NMBR/NOV/NTF3/PALM/ARHGEF3/LEF1/DDX47/ANGPT4/PDE4C/PDE7A/PGAM2/PIK3CG/IL20RB/CYTL1/POMC/ZDHHC13/PPP1CC/ARHGEF10L/SMPD3/SYBU/LIMS2/VAC14/PRKD1/PSMB4/LPAR5/CCAR2/PXN/RASGRF2/S100A4/S100A6/CCL17/SFRP2/CXCR5/SGK1/MICAL1/SOX9/STK10/VAMP2/TLE3/TLR5/TNXB/TRAF1/TWIST1/YWHAG/CACNB2/PAX8/CXCR4/FZD5/TMEM204/NLRX1/RAB11FIP1/UNC93B1/CAPS/COLQ/HIST1H3A/SLA2/IL1F10/FADD/LIMD1/ARHGAP29/LY86/RAB3D/SMAD5-AS1/ARHGEF10/ULK2/TELO2 | 129 |
| GO:0050777 | negative regulation of immune response             | 8/311   | 111/17046  | 0.00097 | 0.02857 | 0.02278 | NLRP6/HLA-B/HLA-E/HLX/IL20RB/MASP1/PSMB4/NLRX1                                                                                                                                                                                                                                                                                                                                                                                                                                                                                                                                                                                                                                                                                                                                                                | 8   |
| GO:0072522 | purine-containing compound biosynthetic process    | 13/311  | 259/17046  | 0.00098 | 0.02857 | 0.02278 | TCIRG1/NPFRR2/ADCY3/ADRB3/ADAL/DRD4/GABBR1/AMPD2/GNAS/GPER1/NME7/HPCA/PALM                                                                                                                                                                                                                                                                                                                                                                                                                                                                                                                                                                                                                                                                                                                                    | 13  |
| GO:0001756 | somitogenesis                                      | 6/311   | 63/17046   | 0.001   | 0.02857 | 0.02278 | DMRT2/SMAD3/MEOX1/MEOX2/LEF1/SFRP2                                                                                                                                                                                                                                                                                                                                                                                                                                                                                                                                                                                                                                                                                                                                                                            | 6   |
| GO:0048584 | positive regulation of response to stimulus        | 52/311  | 1848/17046 | 0.001   | 0.02857 | 0.02278 | CDH3/TSPAN5/CDH13/HCST/CTGF/ADRB3/RNF168/COCH/NLRP6/DRD4/EGFR/RASA3/LARP1/MTOR/GNAS/GPER1/NRG1/HLA-B/HLA-E/HLX/HMGA1/HSP90AA1/CYR61/IL6/ISL1/LCK/SMAD3/MAP3K1/NOV/NTF3/PIK3CG/ZDHHC13/LIMS2/PRKD1/MASP1/PSMB4/CCAR2/PXN/RASGRF2/S100A4/CCL17/SFRP2/SOX9/TLR5/YWHAG/CXCR4/FZD5/NLRX1/UNC93B1/SLA2/FADD/LY86                                                                                                                                                                                                                                                                                                                                                                                                                                                                                                    | 52  |
| GO:0023052 | signaling                                          | 129/311 | 5629/17046 | 0.001   | 0.02857 | 0.02278 | CDH3/TSPAN5/CDH13/KCNMB2/TCIRG1/HCST/NPFRR2/ADCY3/PTH2/CHRNA5/CIDEA/APCDD1/CTGF/ADRB3/NLRP6/DRD4/ECE1/EGFR/EGR3/TMEM17/EPHA3/EPHB4/RASA3/FOXO1/SPG20/FLNB/LARP1/MTOR/GABBR1/TENM4/RGS22/GJA3/GJB2/SDCBP2/DKK3/GLS2/GPR162/GNAS/GPER1/GSTP1/NME7/ANXA2/KCNIP2/NRG1/ANXA6/HLA-B/HLA-E/HLA-F/HPCA/APBA2/HOXD3/HSP90AA1/HTR5A/CYR61/IL6/ISL1/LCK/LLGL1/LTB/LTBP1/SMAD3/MAP3K1/NEDD9/NMBR/NOV/NTF3/PALM/ARHGEF3/LEF1/DDX47/ANGPT4/PDE4C/PDE7A/PGAM2/PIK3CG/IL20RB/CYTL1/POMC/ZDHHC13/PPP1CC/ARHGEF10L/SMPD3/SYBU/LIMS2/VAC14/PRKD1/PSMB4/LPAR5/CCAR2/PXN/RASGRF2/S100A4/S100A6/CCL17/SFRP2/CXCR5/SGK1/MICAL1/SOX9/STK10/VAMP2/TLE3/TLR5/TNXB/TRAF1/TWIST1/YWHAG/CACNB2/PAX8/CXCR4/FZD5/TMEM204/NLRX1/RAB11FIP1/UNC93B1/CAPS/COLQ/HIST1H3A/SLA2/IL1F10/FADD/LIMD1/ARHGAP29/LY86/RAB3D/SMAD5-AS1/ARHGEF10/ULK2/TELO2 | 129 |
| GO:0007015 | actin filament organization                        | 14/311  | 293/17046  | 0.00102 | 0.02892 | 0.02306 | CTGF/PPM1E/MTOR/FMN1/SMAD3/MAP3K1/NEDD9/BIN3/ACTR3B/MICAL1/ACTC1/SH3BGR1/GAS7/ARHGEF10                                                                                                                                                                                                                                                                                                                                                                                                                                                                                                                                                                                                                                                                                                                        | 14  |
| GO:0098609 | cell-cell adhesion                                 | 28/311  | 816/17046  | 0.00103 | 0.02892 | 0.02306 | CDH3/CDH13/DSG3/EGFR/EGR3/MTOR/GNAS/HLA-E/HLX/CYR61/IL6/CDHR4/LCK/SMAD3/NOV/LEF1/PIK3CG/IL20RB/LIMS2/PCDHGC4/PCDHGB7/PCDHGA11/SOX9/STK10/TNXB/FZD5/SLA2/FADD                                                                                                                                                                                                                                                                                                                                                                                                                                                                                                                                                                                                                                                  | 28  |



|            |                                                    |        |            |         |         |         |                                                                                                                                                                                                                                                                                                                                                                                                                                                                                                             |    |
|------------|----------------------------------------------------|--------|------------|---------|---------|---------|-------------------------------------------------------------------------------------------------------------------------------------------------------------------------------------------------------------------------------------------------------------------------------------------------------------------------------------------------------------------------------------------------------------------------------------------------------------------------------------------------------------|----|
| GO:0010033 | response to organic substance                      | 70/311 | 2687/17046 | 0.00103 | 0.02892 | 0.02306 | CDH13/TCIRG1/NPFFR2/ADCY3/CHRNA5/CIDEA/CTGF/CITED4/DNMT3A/DRD4/EGFR/EGR3/EPHA3/RASA3/FOXO1/SPG20/FLNB/MTOR/FBXO2/GJB2/GNAS/GPER1/GSTP1/NRG1/HLA-B/HLA-E/HLA-F/HPCA/HSD17B2/HSP90AA1/HTR5A/CYR61/IL6/ISL1/ACAT1/LCK/LOX/LTB/LTBP1/SMAD3/ME1/MAP3K1/ARHGFE3/LEF1/PIK3CG/IL20RB/PON1/PPP1CC/SYBU/PRKD1/PSMB4/PXN/RASGRF2/CCL17/SFRP2/CXCR5/SOX9/VAMP2/ACTC1/TIMP3/TLR5/TWIST1/PAX8/CXCR4/FZD5/TMEM204/IL1F10/MGARP/FADD/LY86                                                                                   | 70 |
| GO:0030817 | regulation of cAMP biosynthetic process            | 8/311  | 113/17046  | 0.00109 | 0.03021 | 0.02409 | NPFFR2/ADRB3/DRD4/GABBR1/GNAS/GPER1/HPCA/PALM                                                                                                                                                                                                                                                                                                                                                                                                                                                               | 8  |
| GO:0048736 | appendage development                              | 10/311 | 169/17046  | 0.0011  | 0.03021 | 0.02409 | ECE1/SP8/GNAS/FLVCR1/FMN1/MEOX2/LEF1/SFRP2/SOX9/TWIST1                                                                                                                                                                                                                                                                                                                                                                                                                                                      | 10 |
| GO:0060173 | limb development                                   | 10/311 | 169/17046  | 0.0011  | 0.03021 | 0.02409 | ECE1/SP8/GNAS/FLVCR1/FMN1/MEOX2/LEF1/SFRP2/SOX9/TWIST1                                                                                                                                                                                                                                                                                                                                                                                                                                                      | 10 |
| GO:0051345 | positive regulation of hydrolase activity          | 27/311 | 781/17046  | 0.00114 | 0.03103 | 0.02475 | ADCY3/CTGF/EGFR/RASA3/TBC1D9B/RGS22/GNAS/GPER1/HPCA/CYR61/LCK/LLGL1/SMAD3/NTF3/ARHGFE3/ARHGFE10/PRKD1/RASGRF2/CCL17/SFRP2/TCEA1/SH3BGR3/FADD/ARHGAP29/ARHGFE10/USP6NL/RABGAP1L                                                                                                                                                                                                                                                                                                                              | 27 |
| GO:0009893 | positive regulation of metabolic process           | 82/311 | 3277/17046 | 0.00117 | 0.03131 | 0.02496 | CDH3/CDH13/DMRT2/TBR1/ADCY3/PSIP1/CTGF/ADRB3/CITED4/RNF168/DRD4/ECE1/EGFR/RASA3/TBC1D9B/FOXO1/LARP1/MTOR/RGS22/GAPDHS/GNAS/GPER1/DOK7/GSTP1/BRF1/ANXA2/NRG1/HMGA1/HPCA/HOXD3/HSP90AA1/BARHL2/CYR61/IL6/ISL1/LCK/LLGL1/LTB/SMAD3/MEF2D/MAP3K1/MEOX1/MEOX2/MF12/NFYB/NTF3/ARHGFE3/LEF1/ANGPT4/PIK3CG/RIPK4/CYTL1/POMC/PIWIL2/ARHGFE10/PRKD1/PSMB4/PXN/RASGRF2/CCL17/SFRP2/TRA2B/SOX9/STK10/TBP/TCEA1/ACTC1/TLR5/TRA1/TWIST1/PAX8/CXCR4/FZD5/SH3BGR3/FADD/ZFAND2A/LDB2/ARHGAP29/H2AFY/ARHGFE10/USP6NL/RABGAP1L | 82 |
| GO:0043534 | blood vessel endothelial cell migration            | 6/311  | 65/17046   | 0.00118 | 0.03131 | 0.02496 | EGR3/EPHB4/VASH1/ANGPT4/PRKD1/SH3BGR3                                                                                                                                                                                                                                                                                                                                                                                                                                                                       | 6  |
| GO:0030036 | actin cytoskeleton organization                    | 20/311 | 511/17046  | 0.00118 | 0.03131 | 0.02496 | CTGF/EPHA3/PPM1E/LIMCH1/FLNB/MTOR/FMN1/LLGL1/SMAD3/MAP3K1/NEDD9/NTF3/BIN3/ACTR3B/MICAL1/ACTC1/TNXB/SH3BGR3/GAS7/ARHGFE10                                                                                                                                                                                                                                                                                                                                                                                    | 20 |
| GO:0007166 | cell surface receptor signaling pathway            | 66/311 | 2511/17046 | 0.00118 | 0.03131 | 0.02496 | CDH3/TSPAN5/CDH13/TCIRG1/ADCY3/CIDEA/APCDD1/CTGF/EGFR/TMEM17/EPHA3/EPHB4/RASA3/FOXO1/SPG20/FLNB/MTOR/DKK3/GPER1/GSTP1/NME7/NRG1/HLA-B/HLA-E/HLA-F/HOXD3/HSP90AA1/CYR61/IL6/ISL1/LCK/LLGL1/LTB/LTBP1/SMAD3/MAP3K1/NEDD9/NOV/NTF3/ARHGFE3/LEF1/DDX47/ANGPT4/PGAM2/IL20RB/PPP1CC/LIMS2/PRKD1/PSMB4/CCAR2/PXN/RASGRF2/CCL17/SFRP2/CXCR5/SOX9/TLE3/TRA1/CXCR4/FZD5/TMEM204/SLA2/IL1F10/FADD/LIMD1/LY86                                                                                                           | 66 |
| GO:0060561 | apoptotic process involved in morphogenesis        | 4/311  | 26/17046   | 0.00118 | 0.03131 | 0.02496 | CYR61/LEF1/PAX8/FZD5                                                                                                                                                                                                                                                                                                                                                                                                                                                                                        | 4  |
| GO:0098602 | single organism cell adhesion                      | 25/311 | 704/17046  | 0.00119 | 0.03141 | 0.02505 | CDH3/EGFR/EGR3/UNC13D/MTOR/GNAS/HLA-E/HLX/CYR61/IL6/LCK/SMAD3/MF12/NOV/LEF1/PIK3CG/IL20RB/LIMS2/PXN/SOX9/STK10/TNXB/FZD5/SLA2/FADD                                                                                                                                                                                                                                                                                                                                                                          | 25 |
| GO:0050678 | regulation of epithelial cell proliferation        | 13/311 | 265/17046  | 0.00121 | 0.03162 | 0.02521 | CDH3/CDH13/EGFR/EGR3/VASH1/MTOR/IL6/SMAD3/LIMS2/PRKD1/SFRP2/SOX9/TWIST1                                                                                                                                                                                                                                                                                                                                                                                                                                     | 13 |
| GO:2000026 | regulation of multicellular organismal development | 43/311 | 1465/17046 | 0.00127 | 0.03297 | 0.02629 | CDH3/DMRT2/TBR1/CTGF/EGR3/EPHA3/VASH1/ACIN1/SPG20/MTOR/TENM4/GNAS/GPER1/NRG1/HLA-B/HLX/HOXB3/HOXD3/BARHL2/CYR61/IL6/ISL1/LCK/SMAD3/NTF3/PALM/LEF1/CEND1/ANGPT4/LIMS2/PRKD1/SFRP2/SOX9/PHLDA2/TWIST1/YWHAG/PAX8/CXCR4/COLQ/SCRT1/FADD/H2AFY/ULK2                                                                                                                                                                                                                                                             | 43 |
| GO:0009967 | positive regulation of signal transduction         | 40/311 | 1334/17046 | 0.00128 | 0.03297 | 0.02629 | CDH3/TSPAN5/CDH13/HCST/CTGF/ADRB3/DRD4/EGFR/RASA3/MTOR/GNAS/GPER1/NRG1/CYR61/IL6/ISL1/LCK/SMAD3/MAP3K1/NOV/NTF3/PIK3CG/ZDHHC13/LIMS2/PRKD1/PSMB4/CCAR2/PXN/RASGRF2/S100A4/CCL17/SFRP2/SOX9/TLR5/YWHAG/CXCR4/FZD5/SLA2/FADD/LY86                                                                                                                                                                                                                                                                             | 40 |

|            |                                                       |         |            |         |         |         |                                                                                                                                                                                                                                                                                                                                                                                                                                                                                                                                                                                                                                                                                                                                                                                                                                 |     |
|------------|-------------------------------------------------------|---------|------------|---------|---------|---------|---------------------------------------------------------------------------------------------------------------------------------------------------------------------------------------------------------------------------------------------------------------------------------------------------------------------------------------------------------------------------------------------------------------------------------------------------------------------------------------------------------------------------------------------------------------------------------------------------------------------------------------------------------------------------------------------------------------------------------------------------------------------------------------------------------------------------------|-----|
| GO:0006140 | regulation of nucleotide metabolic process            | 11/311  | 203/17046  | 0.00129 | 0.03297 | 0.02629 | NPFRR2/ADRB3/DRD4/GABBR1/GAPDH5/GNAS/GPER1/HPCA/ME1/PALM/PGAM2                                                                                                                                                                                                                                                                                                                                                                                                                                                                                                                                                                                                                                                                                                                                                                  | 11  |
| GO:0051252 | regulation of RNA metabolic process                   | 83/311  | 3337/17046 | 0.00129 | 0.03297 | 0.02629 | CDH13/MBNL2/C1D/ZBTB18/DMRT2/TBR1/PSIP1/ZBED9/CIDEA/ZFP42/ZNF709/ZNF781/CITED4/RNF168/DNMT3A/EGFR/EGR3/SP8/XRN2/ACIN1/FOXO1/SPG20/MTOR/DKK3/GPER1/ZBTB44/GTF2B/BRF1/NRG1/HLX/HMGA1/HOXB3/HOXC5/HOXC6/HOXC3/BARHL2/CYR61/IL6/ISL1/HLS1/SMAD3/MEF2D/MEOX1/MEOX2/NFYB/NTF3/LEF1/RIPK4/CYTL1/POMC/BNC2/PRMT6/ZNF532/CNOT11/PRKD1/CCAR2/SFRP2/TRA2B/SGK1/SOX9/TAF4B/TBP/TCEA1/TLE3/TRAF1/TWIST1/ZNF124/ZNF177/PAX8/FZD5/ZC3H14/ZNF606/SCRT1/HIST1H3A/SLA2/KDM2B/LOXL3/CBX2/GAS7/FADD/LIMD1/LDB2/H2AFY                                                                                                                                                                                                                                                                                                                                | 83  |
| GO:0048523 | negative regulation of cellular process               | 93/311  | 3831/17046 | 0.00131 | 0.03297 | 0.02629 | CDH13/C1D/ZBTB18/B4GALT7/CIDEA/ANKRD9/APCDD1/CTGF/RNF168/NLRP6/DNMT3A/DRD4/EGFR/EGR3/PATL2/RASA3/PPM1E/VASH1/ACIN1/FOXO1/SPG20/MTOR/GABBR1/RGS22/FBXO2/DKK3/VPS4A/GPER1/GSTP1/GZMA/ANXA2/SERPIND1/NRG1/HLX/HMGA1/HPCA/HOXB3/HOXC6/ACADL/COL28A1/CYR61/IL6/ISL1/ITIH3/HLS1/LCK/LTBP1/SMAD3/MFI2/NOV/NTF3/PALM/LEF1/CEND1/ANGPT4/PDE4C/PIK3CG/IL20RB/PPP1CC/PRMT6/LIMS2/PRKD1/MASP1/PSMB4/METT14/CCAR2/CCL17/SFRP2/SOX9/TBP/ACTC1/TIMP3/TWIST1/YWHAG/ZNF177/PAX8/FZD5/NLRX1/ZC3H14/RAB11FIP1/COL18A1/SCRT1/HIST1H3A/SLA2/SPINK7/KDM2B/LOXL3/CBX2/GAS7/FADD/LIMD1/H2AFY/ULK2                                                                                                                                                                                                                                                       | 93  |
| GO:0002709 | regulation of T cell mediated immunity                | 5/311   | 45/17046   | 0.00132 | 0.03297 | 0.02629 | HLA-B/HLA-E/IL20RB/FZD5/FADD                                                                                                                                                                                                                                                                                                                                                                                                                                                                                                                                                                                                                                                                                                                                                                                                    | 5   |
| GO:0032233 | positive regulation of actin filament bundle assembly | 5/311   | 45/17046   | 0.00132 | 0.03297 | 0.02629 | CTGF/PPM1E/MTOR/SMAD3/ARHGFE10                                                                                                                                                                                                                                                                                                                                                                                                                                                                                                                                                                                                                                                                                                                                                                                                  | 5   |
| GO:0061061 | muscle structure development                          | 21/311  | 554/17046  | 0.00133 | 0.03311 | 0.02641 | ZBTB18/COL11A1/EGR3/FLNB/MTOR/NRG1/HLX/IL6/ISL1/SMAD3/MEF2D/MEOX2/NOV/NTF3/LEF1/BIN3/CCL17/SOX9/ACTC1/TWIST1/TMEM204                                                                                                                                                                                                                                                                                                                                                                                                                                                                                                                                                                                                                                                                                                            | 21  |
| GO:0032680 | regulation of tumor necrosis factor production        | 7/311   | 91/17046   | 0.00138 | 0.03388 | 0.02702 | CIDEA/GSTP1/HLA-E/ISL1/POMC/TWIST1/FADD                                                                                                                                                                                                                                                                                                                                                                                                                                                                                                                                                                                                                                                                                                                                                                                         | 7   |
| GO:0035282 | segmentation                                          | 7/311   | 91/17046   | 0.00138 | 0.03388 | 0.02702 | DMRT2/SMAD3/MEOX1/MEOX2/LEF1/SFRP2/FZD5                                                                                                                                                                                                                                                                                                                                                                                                                                                                                                                                                                                                                                                                                                                                                                                         | 7   |
| GO:0051046 | regulation of secretion                               | 23/311  | 633/17046  | 0.00139 | 0.03392 | 0.02705 | CIDEA/NLRP6/DRD4/UNC13D/VPS4A/GNAS/GPER1/NRG1/HLA-E/IL6/ISL1/LLGL1/NOV/PDE4C/POMC/SMPD3/SYBU/SGK1/VAMP2/TWIST1/PAX8/RAB11FIP1/RAB3D                                                                                                                                                                                                                                                                                                                                                                                                                                                                                                                                                                                                                                                                                             | 23  |
| GO:0007517 | muscle organ development                              | 15/311  | 337/17046  | 0.00139 | 0.03392 | 0.02705 | ZBTB18/COL11A1/EGR3/FLNB/NRG1/HLX/IL6/ISL1/SMAD3/MEF2D/MEOX2/LEF1/BIN3/ACTC1/TWIST1                                                                                                                                                                                                                                                                                                                                                                                                                                                                                                                                                                                                                                                                                                                                             | 15  |
| GO:0007154 | cell communication                                    | 132/311 | 5832/17046 | 0.00142 | 0.03427 | 0.02733 | CDH3/TSPAN5/CDH13/KCNMB2/TCIRG1/HGST/NPFRR2/ADCY3/PTH2/CHRNA5/CIDEA/APCDD1/CTGF/ADRB3/NLRP6/DRD4/EGFR/EGR3/TMEM17/EPHA3/EPHB4/RASA3/ACIN1/FOXO1/SPG20/FLNB/LARP1/MTOR/GABBR1/TENM4/RGS22/GJA3/GJB2/SDCBP2/DKK3/GLS2/GPR162/GNAS/GPER1/GSTP1/NME7/ANXA2/KCNIP2/NRG1/ANXA6/HLA-B/HLA-E/HLA-F/HPCA/APBA2/HOXB3/HSP90AA1/HTR5A/CYR61/IL6/ISL1/KRT15/LCK/LLGL1/LTB/LTBP1/SMAD3/MAP3K1/NUDT1/NEDD9/NMBR/NOV/NTF3/PALM/ARHGFE3/LEF1/DDX47/ANGPT4/PDE4C/PDE7A/PGAM2/PIK3CG/IL20RB/CYTL1/POMC/ZDHHC13/PPP1CC/ARHGFE10L/SMPD3/SYBU/LIMS2/VAC14/PRKD1/PSMB4/LPAR5/CCAR2/PXN/RASGRF2/S100A4/S100A6/CCL17/SFRP2/CXCR5/SGK1/MICAL1/SOX9/STK10/VAMP2/TLE3/TLR5/TNFB/TRAJ1/TWIST1/UPP1/YWHAG/CACNB2/PAX8/CXCR4/FZD5/TMEM204/NLRX1/RAB11FIP1/UNC93B1/CAPS/COLQ/HIST1H3A/SLA2/IL1F10/FADD/LIMD1/ARHGAP29/LY86/RAB3D/SMAD5-AS1/ARHGFE10/ULK2/TELO2 | 132 |
| GO:0060537 | muscle tissue development                             | 15/311  | 338/17046  | 0.00143 | 0.03453 | 0.02754 | ZBTB18/COL11A1/FLNB/TENM4/NRG1/HLX/ISL1/SMAD3/MEF2D/MEOX2/LEF1/BIN3/SOX9/ACTC1/TWIST1                                                                                                                                                                                                                                                                                                                                                                                                                                                                                                                                                                                                                                                                                                                                           | 15  |
| GO:0010628 | positive regulation of gene expression                | 46/311  | 1608/17046 | 0.00144 | 0.03459 | 0.02759 | CDH3/CDH13/DMRT2/TBR1/PSIP1/CTGF/CITED4/EGFR/FOXO1/LARP1/MTOR/GPER1/BRF1/HMGA1/HOXB3/BARHL2/CYR61/IL6/ISL1/LCK/SMAD3/MEF2D/MEOX1/MEOX2/MFI2/NFYB/NTF3/LEF1/RIPK4/CYTL1/POMC/PIWIL2/PRKD1/SFRP2/TRA2B/SOX9/TBP/TCEA1/ACTC1/TRAF1/TWIST1/PAX8/FZD5/FADD/LDB2/H2AFY                                                                                                                                                                                                                                                                                                                                                                                                                                                                                                                                                                | 46  |
| GO:0060548 | negative regulation of cell death                     | 28/311  | 835/17046  | 0.00145 | 0.03461 | 0.0276  | CIDEA/ANKRD9/CTGF/EGFR/EGR3/FOXO1/GSTP1/NRG1/CYR61/IL6/ISL1/SMAD3/NOV/NTF3/LEF1/ANGPT4/PIK3CG/LIMS2/PRKD1/PSMB4/CCAR2/SFRP2/SOX9/ACTC1/TWIST1/PAX8/KDM2B/FADD                                                                                                                                                                                                                                                                                                                                                                                                                                                                                                                                                                                                                                                                   | 28  |
| GO:0048863 | stem cell differentiation                             | 12/311  | 238/17046  | 0.00147 | 0.03473 | 0.02769 | EPHA3/NRG1/ISL1/SMAD3/MEOX1/LEF1/S100A4/SFRP2/SOX9/TWIST1/PAX8/LOXL3                                                                                                                                                                                                                                                                                                                                                                                                                                                                                                                                                                                                                                                                                                                                                            | 12  |
| GO:0006935 | chemotaxis                                            | 27/311  | 796/17046  | 0.0015  | 0.03506 | 0.02796 | CDH13/TBR1/EGFR/EGR3/EPHA3/EPHB4/RASA3/SERPIND1/NRG1/HSP90AA1/CYR61/IL6/ISL1/SMAD3/NOV/NTF3/LEF1/PIK3CG/PRKD1/PSMB4/TRPC7/RASGRF2/CCL17/CXCR5/TRPC4/CACNB2/CXCR4                                                                                                                                                                                                                                                                                                                                                                                                                                                                                                                                                                                                                                                                | 27  |
| GO:0042330 | taxis                                                 | 27/311  | 796/17046  | 0.0015  | 0.03506 | 0.02796 | CDH13/TBR1/EGFR/EGR3/EPHA3/EPHB4/RASA3/SERPIND1/NRG1/HSP90AA1/CYR61/IL6/ISL1/SMAD3/NOV/NTF3/LEF1/PIK3CG/PRKD1/PSMB4/TRPC7/RASGRF2/CCL17/CXCR5/TRPC4/CACNB2/CXCR4                                                                                                                                                                                                                                                                                                                                                                                                                                                                                                                                                                                                                                                                | 27  |

|            |                                                                     |        |            |         |         |         |                                                                                                                                                                                                                                                                                                                                                                                                            |    |
|------------|---------------------------------------------------------------------|--------|------------|---------|---------|---------|------------------------------------------------------------------------------------------------------------------------------------------------------------------------------------------------------------------------------------------------------------------------------------------------------------------------------------------------------------------------------------------------------------|----|
| GO:0030029 | actin filament-based process                                        | 21/311 | 561/17046  | 0.00155 | 0.03588 | 0.02862 | FRMD6/CTGF/EPHA3/PPM1E/LIMCH1/FLNB/MTOR/FMN1/LLGL1/SMAD3/MAP3K1/NEDD9/NTF3/BIN3/ACTR3B/MICAL1/ACTC1/TNXB/SH3BGLR3/GAS7/ARHGEF10                                                                                                                                                                                                                                                                            | 21 |
| GO:0032640 | tumor necrosis factor production                                    | 7/311  | 93/17046   | 0.00156 | 0.03588 | 0.02862 | CIDEA/GSTP1/HLA-E/ISL1/POMC/TWIST1/FADD                                                                                                                                                                                                                                                                                                                                                                    | 7  |
| GO:2000147 | positive regulation of cell motility                                | 15/311 | 341/17046  | 0.00156 | 0.03588 | 0.02862 | CDH13/EGFR/GPER1/CYR61/IL6/SMAD3/NTF3/LEF1/ANGPT4/PRKD1/SOX9/TWIST1/PTP4A1/COL18A1/FADD                                                                                                                                                                                                                                                                                                                    | 15 |
| GO:0042981 | regulation of apoptotic process                                     | 39/311 | 1305/17046 | 0.00157 | 0.03588 | 0.02862 | CIDEA/ANKRD9/CTGF/EGFR/EGR3/ACIN1/FOXO1/GLS2/GPER1/GSTP1/GZMA/NRG1/CYR61/IL6/ISL1/LCK/SMAD3/MAP3K1/NTF3/ARHGEF3/LEF1/ANGPT4/PIK3CG/LIMS2/PSMB4/CCAR2/RASGRF2/SFRP2/SGK1/SOX9/STK10/ACTC1/TRA1/TWIST1/YWHAG/PAX8/COL18A1/KDM2B/FADD                                                                                                                                                                         | 39 |
| GO:0009152 | purine ribonucleotide biosynthetic process                          | 12/311 | 240/17046  | 0.00157 | 0.03588 | 0.02862 | TCIRG1/NPFFR2/ADCY3/ADRB3/DRD4/GABBR1/AMPD2/GNAS/GPER1/NME7/HPCA/PALM                                                                                                                                                                                                                                                                                                                                      | 12 |
| GO:0035107 | appendage morphogenesis                                             | 9/311  | 148/17046  | 0.0016  | 0.03603 | 0.02874 | ECE1/SP8/GNAS/FLVCR1/FMN1/LEF1/SFRP2/SOX9/TWIST1                                                                                                                                                                                                                                                                                                                                                           | 9  |
| GO:0035108 | limb morphogenesis                                                  | 9/311  | 148/17046  | 0.0016  | 0.03603 | 0.02874 | ECE1/SP8/GNAS/FLVCR1/FMN1/LEF1/SFRP2/SOX9/TWIST1                                                                                                                                                                                                                                                                                                                                                           | 9  |
| GO:0045785 | positive regulation of cell adhesion                                | 15/311 | 343/17046  | 0.00166 | 0.03707 | 0.02956 | CDH13/EGR3/UNC13D/MTOR/NRG1/HLA-E/HLX/FMN1/CYR61/IL6/LCK/SMAD3/LEF1/SFRP2/FADD                                                                                                                                                                                                                                                                                                                             | 15 |
| GO:1903555 | regulation of tumor necrosis factor superfamily cytokine production | 7/311  | 94/17046   | 0.00166 | 0.03707 | 0.02956 | CIDEA/GSTP1/HLA-E/ISL1/POMC/TWIST1/FADD                                                                                                                                                                                                                                                                                                                                                                    | 7  |
| GO:0031325 | positive regulation of cellular metabolic process                   | 69/311 | 2688/17046 | 0.00167 | 0.03714 | 0.02962 | CDH3/CDH13/DMRT2/TBR1/ADCY3/PSIP1/CTGF/ADRB3/CITED4/RNF168/DRD4/ECE1/EGFR/RASA3/FOXO1/LARP1/MTOR/GAPDH5/GNAS/GPER1/DOK7/GSTP1/BRF1/ANXA2/NRG1/HMGA1/HPCA/HSP90AA1/BARHL2/CYR61/IL6/ISL1/LCK/LTB/SMAD3/MEF2D/MAP3K1/MEOX1/MEOX2/MFI2/NFYB/NTF3/LEF1/ANGPT4/PIK3CG/RIPK4/CYTL1/POMC/PIWIL2/PRKD1/PSMB4/PXN/RASGRF2/CCL17/SFRP2/TRA2B/SOX9/STK10/TBP/TCEA1/TLR5/TRA1/TWIST1/PAX8/CXCR4/FZD5/FADD/ZFAND2A/LDB2 | 69 |
| GO:0006955 | immune response                                                     | 43/311 | 1487/17046 | 0.0017  | 0.03752 | 0.02992 | HCS1T/ADCY3/RNF168/COCH/NLRP6/EGFR/UNC13D/RASA3/FOXO1/MTOR/GPER1/GZMA/NRG1/HLA-B/HLA-E/HLA-F/HLX/HSP90AA1/IL6/LCK/LTB/SMAD3/MAP3K1/LEF1/PIK3CG/IL20RB/PRKD1/MASP1/PSMB4/RASGRF2/DEFB134/CCL17/CXCR5/VAMP2/TLR5/FZD5/NLRX1/UNC93B1/SLA2/IL1F10/FADD/IL32/LY86                                                                                                                                               | 43 |
| GO:0050679 | positive regulation of epithelial cell proliferation                | 9/311  | 150/17046  | 0.00175 | 0.03852 | 0.03072 | CDH3/CDH13/EGFR/EGR3/MTOR/IL6/PRKD1/SOX9/TWIST1                                                                                                                                                                                                                                                                                                                                                            | 9  |
| GO:0043067 | regulation of programmed cell death                                 | 39/311 | 1314/17046 | 0.00177 | 0.03879 | 0.03093 | CIDEA/ANKRD9/CTGF/EGFR/EGR3/ACIN1/FOXO1/GLS2/GPER1/GSTP1/GZMA/NRG1/CYR61/IL6/ISL1/LCK/SMAD3/MAP3K1/NTF3/ARHGEF3/LEF1/ANGPT4/PIK3CG/LIMS2/PSMB4/CCAR2/RASGRF2/SFRP2/SGK1/SOX9/STK10/ACTC1/TRA1/TWIST1/YWHAG/PAX8/COL18A1/KDM2B/FADD                                                                                                                                                                         | 39 |
| GO:1902107 | positive regulation of leukocyte differentiation                    | 8/311  | 122/17046  | 0.00179 | 0.03879 | 0.03093 | EGR3/ACIN1/GNAS/HLX/IL6/LCK/LEF1/FADD                                                                                                                                                                                                                                                                                                                                                                      | 8  |

|            |                                                     |        |            |         |         |         |                                                                                                                                                                                                                                                                                                                                 |    |
|------------|-----------------------------------------------------|--------|------------|---------|---------|---------|---------------------------------------------------------------------------------------------------------------------------------------------------------------------------------------------------------------------------------------------------------------------------------------------------------------------------------|----|
| GO:0002711 | positive regulation of T cell mediated immunity     | 4/311  | 29/17046   | 0.0018  | 0.03879 | 0.03093 | HLA-B/HLA-E/FZD5/FADD                                                                                                                                                                                                                                                                                                           | 4  |
| GO:0031280 | negative regulation of cyclase activity             | 4/311  | 29/17046   | 0.0018  | 0.03879 | 0.03093 | DRD4/GABBR1/HPCA/PALM                                                                                                                                                                                                                                                                                                           | 4  |
| GO:0071822 | protein complex subunit organization                | 46/311 | 1629/17046 | 0.00187 | 0.03948 | 0.03149 | TCIRG1/SEPT9/APOA1BP/COL11A1/CTGF/EML1/PPM1E/MTOR/VPS4A/ANXA2/NRG1/ANXA6/HMGA1/ACADL/HSP90AA1/FMN1/HILS1/ACAT1/LLGL1/LOX/SMAD3/ME1/MAP3K1/NEDD9/ANGPT4/BIN3/ACTR3B/PXN/RPL8/RPL29/SFRP2/MICAL1/SOX9/VAMP2/ACTC1/TNXB/TRAFA1/TWIST1/HIST1H2BM/SH3BGL3/HIST1H3A/PARD6B/GAS7/FADD/H2AFY/ARHGEF10                                   | 46 |
| GO:0045597 | positive regulation of cell differentiation         | 26/311 | 768/17046  | 0.00187 | 0.03948 | 0.03149 | CTGF/EGR3/UNC13D/EPHA3/ACIN1/MTOR/TENM4/GNAS/GPER1/NRG1/HLX/HOXD3/CYR61/IL6/LCK/SMAD3/PALM/LEF1/PRKD1/SFRP2/SOX9/TWIST1/PAX8/CXCR4/FADD/H2AFY                                                                                                                                                                                   | 26 |
| GO:0048704 | embryonic skeletal system morphogenesis             | 7/311  | 96/17046   | 0.00188 | 0.03948 | 0.03149 | COL11A1/GNAS/FLVCR1/HOXB3/HOXD3/SMAD3/TWIST1                                                                                                                                                                                                                                                                                    | 7  |
| GO:0021781 | glial cell fate commitment                          | 3/311  | 14/17046   | 0.00189 | 0.03948 | 0.03149 | NRG1/NTF3/SOX9                                                                                                                                                                                                                                                                                                                  | 3  |
| GO:0048871 | multicellular organismal homeostasis                | 14/311 | 313/17046  | 0.0019  | 0.03948 | 0.03149 | CDH3/ADCY3/CIDEA/ZG16B/CTGF/ADRB3/FOXO1/AMPD2/GNAS/ACADL/IL20RB/CYTL1/SOX9/LDB2                                                                                                                                                                                                                                                 | 14 |
| GO:0030001 | metal ion transport                                 | 26/311 | 769/17046  | 0.00191 | 0.03948 | 0.03149 | KCNMB2/TCIRG1/CLCA1/C15orf27/SLC38A10/TRPM6/CTGF/TRPV3/DRD4/RASA3/CRACR2B/GPER1/KCNIP2/ANXA6/LCK/MFI2/PIK3CG/ZDHHC13/PRKD1/TRPC7/SGK1/VAMP2/TRAPPC10/TRPC4/CACNB2/SMDT1                                                                                                                                                         | 26 |
| GO:0022604 | regulation of cell morphogenesis                    | 18/311 | 457/17046  | 0.00191 | 0.03948 | 0.03149 | TBR1/COCH/UNC13D/EPHA3/SPG20/BARHL2/IL6/SMAD3/MFI2/PALM/LEF1/PXN/SFRP2/TWIST1/PAX8/GAS7/LIMD1/ULK2                                                                                                                                                                                                                              | 18 |
| GO:0070588 | calcium ion transmembrane transport                 | 10/311 | 182/17046  | 0.00191 | 0.03948 | 0.03149 | C15orf27/TRPM6/TRPV3/DRD4/RASA3/PIK3CG/TRPC7/TRPC4/CACNB2/SMDT1                                                                                                                                                                                                                                                                 | 10 |
| GO:1901564 | organonitrogen compound metabolic process           | 54/311 | 1996/17046 | 0.00192 | 0.03948 | 0.03149 | BCKDK/TCIRG1/NPFFR2/ADCY3/HIBADH/B4GALT7/APOA1BP/ADRB3/ADAL/DNMT3A/DRD4/ECE1/PATL2/ALAS1/LARP1/MTOR/FUCA1/GABBR1/GAPDHS/AMPD2/GLS2/GNAS/GPER1/GSTP1/NME7/HPCA/ACADL/BARHL2/CYR61/IL6/ITIH3/ACAT1/ME1/NUDT1/PALM/PDE4C/PDE7A/PGAM2/CYTL1/POMC/PON1/LPCAT2/PIWIL2/SMPD3/CN0T11/PRKD1/PSMB4/METTL14/RPL8/RPL29/CERK/UPP1/VARS/PAX8 | 54 |
| GO:0014032 | neural crest cell development                       | 5/311  | 49/17046   | 0.00193 | 0.03948 | 0.03149 | NRG1/ISL1/LEF1/SOX9/TWIST1                                                                                                                                                                                                                                                                                                      | 5  |
| GO:0006164 | purine nucleotide biosynthetic process              | 12/311 | 246/17046  | 0.00194 | 0.03948 | 0.03149 | TCIRG1/NPFFR2/ADCY3/ADRB3/DRD4/GABBR1/AMPD2/GNAS/GPER1/NME7/HPCA/PALM                                                                                                                                                                                                                                                           | 12 |
| GO:0051272 | positive regulation of cellular component movement  | 15/311 | 349/17046  | 0.00196 | 0.03948 | 0.03149 | CDH13/EGFR/GPER1/CYR61/IL6/SMAD3/NTF3/LEF1/ANGPT4/PRKD1/SOX9/TWIST1/PTP4A1/COL18A1/FADD                                                                                                                                                                                                                                         | 15 |
| GO:0010562 | positive regulation of phosphorus metabolic process | 33/311 | 1062/17046 | 0.00196 | 0.03948 | 0.03149 | ADCY3/CTGF/ADRB3/DRD4/EGFR/RASA3/MTOR/GAPDHS/GNAS/GPER1/DOK7/ANXA2/NRG1/HPCA/CYR61/IL6/ISL1/LCK/SMAD3/MAP3K1/NTF3/ANGPT4/PIK3CG/PRKD1/PSMB4/PXN/RASGRF2/CCL17/SFRP2/SOX9/STK10/CXCR4/FZD5                                                                                                                                       | 33 |

|            |                                                       |         |            |         |         |         |                                                                                                                                                                                                                                                                                                                                                                                                                                                                                                                                                                                                                                                                    |     |
|------------|-------------------------------------------------------|---------|------------|---------|---------|---------|--------------------------------------------------------------------------------------------------------------------------------------------------------------------------------------------------------------------------------------------------------------------------------------------------------------------------------------------------------------------------------------------------------------------------------------------------------------------------------------------------------------------------------------------------------------------------------------------------------------------------------------------------------------------|-----|
| GO:0045937 | positive regulation of phosphate metabolic process    | 33/311  | 1062/17046 | 0.00196 | 0.03948 | 0.03149 | ADCY3/CTGF/ADRB3/DRD4/EGFR/RASA3/MTOR/GAPDHS/GNAS/GPER1/DOK7/ANXA2/NRG1/HPCA/CYR61/IL6/ISL1/LCK/SMAD3/MAP3K1/NTF3/ANGPT4/PIK3CG/PRKD1/PSMB4/PXN/RASGRF2/CCL17/SFRP2/SOX9/STK10/CXCR4/FZD5                                                                                                                                                                                                                                                                                                                                                                                                                                                                          | 33  |
| GO:0009165 | nucleotide biosynthetic process                       | 14/311  | 315/17046  | 0.00202 | 0.04043 | 0.03224 | TCIRG1/NPFFR2/ADCY3/ADRB3/DRD4/GABBR1/AMPD2/GNAS/GPER1/NME7/HPCA/ME1/PALM/UPP1                                                                                                                                                                                                                                                                                                                                                                                                                                                                                                                                                                                     | 14  |
| GO:0044085 | cellular component biogenesis                         | 61/311  | 2329/17046 | 0.00205 | 0.04087 | 0.03259 | CDH3/CDH13/TCIRG1/C1D/SEPT9/PSIP1/APOA1BP/SCLT1/CTGF/WBP2NL/PATL2/TMEM17/EPHA3/PPM1E/MTOR/TENM4/GJB2/VPS4A/ANXA2/NRG1/ANXA6/HMGA1/ACADL/HSP90AA1/FMN1/CYR61/HILS1/ACAT1/LLGL1/LOX/SMAD3/ME1/MAP3K1/NEDD9/PALM/DDX47/ANGPT4/PLEC/LIMS2/BIN3/ACTR3B/PXN/SOX9/VAMP2/ACTC1/TNXB/TRAF1/TWIST1/FZD5/COLQ/HIST1H2BM/HIST1H3A/PARD6B/GAS7/FADD/LIMD1/LDB2/H2AFY/ARHGEF10/ULK2/USP6NL                                                                                                                                                                                                                                                                                       | 61  |
| GO:0071706 | tumor necrosis factor superfamily cytokine production | 7/311   | 98/17046   | 0.00211 | 0.04188 | 0.0334  | CIDEA/GSTP1/HLA-E/ISL1/POMC/TWIST1/FADD                                                                                                                                                                                                                                                                                                                                                                                                                                                                                                                                                                                                                            | 7   |
| GO:0034329 | cell junction assembly                                | 11/311  | 217/17046  | 0.00219 | 0.04315 | 0.03441 | CDH3/CDH13/EPHA3/GJB2/FMN1/SMAD3/PLEC/LIMS2/PXN/FZD5/PARD6B                                                                                                                                                                                                                                                                                                                                                                                                                                                                                                                                                                                                        | 11  |
| GO:0010467 | gene expression                                       | 111/311 | 4805/17046 | 0.0022  | 0.04315 | 0.03441 | CDH3/TSPAN5/CDH13/MBNL2/C1D/ZBTB18/DMRT2/CELF2/TBR1/PSIP1/ZBED9/CIDEA/ZFP42/CTGF/ZNF709/ZNF781/CITED4/RNF168/DNMT3A/ECE1/EGFR/EGR3/PATL2/SP8/XRN2/ACIN1/FOXO1/LARP1/MTOR/DKK3/GLS2/GNAS/GPER1/ZBTB44/GTF2B/BRF1/NRG1/HLX/HMGA1/APBA2/HOXB3/HOXC5/HOXC6/HOXD3/FMN1/BARHL2/CYR61/IL6/ISL1/HILS1/LCK/LTB/SMAD3/MEF2D/MEOX1/MEOX2/MFI2/NFYB/NOV/NTF3/LEF1/DDX47/RIPK4/CYTL1/POMC/MOV10L1/BNC2/PPP1CC/PIWIL2/PRMT6/ZNF532/WDR33/CNOT11/PRKD1/MASP1/PSMB4/METTL14/CCAR2/RPL8/RPL29/SFRP2/TRA2B/SGK1/SOX9/TAF4B/TBP/TCEA1/ACTC1/TLE3/TRAF1/PHLDA2/TWIST1/VARS/YWHAG/ZNF124/ZNF177/PAX8/FZD5/ZC3H14/ZNF606/SCRT1/HIST1H3A/SLA2/KDM2B/LOXL3/CBX2/GAS7/FADD/LIMD1/LDB2/H2AFY | 111 |
| GO:0009725 | response to hormone                                   | 31/311  | 985/17046  | 0.00221 | 0.04315 | 0.03441 | TCIRG1/NPFFR2/ADCY3/CTGF/CITED4/DNMT3A/DRD4/EGFR/EGR3/RASA3/FOXO1/MTOR/GJB2/GNAS/GPER1/NRG1/HTR5A/IL6/ISL1/ACAT1/LCK/LOX/ME1/LEF1/PSMB4/PXN/RASGRF2/VAMP2/TIMP3/PAX8/MGARP                                                                                                                                                                                                                                                                                                                                                                                                                                                                                         | 31  |
| GO:0001101 | response to acid chemical                             | 13/311  | 284/17046  | 0.00224 | 0.04315 | 0.03441 | CTGF/DNMT3A/EGFR/EPHA3/MTOR/GNAS/HPCA/HSD17B2/IL6/PON1/SOX9/TIMP3/COL18A1                                                                                                                                                                                                                                                                                                                                                                                                                                                                                                                                                                                          | 13  |
| GO:1901293 | nucleoside phosphate biosynthetic process             | 14/311  | 319/17046  | 0.00227 | 0.04315 | 0.03441 | TCIRG1/NPFFR2/ADCY3/ADRB3/DRD4/GABBR1/AMPD2/GNAS/GPER1/NME7/HPCA/ME1/PALM/UPP1                                                                                                                                                                                                                                                                                                                                                                                                                                                                                                                                                                                     | 14  |
| GO:0050727 | regulation of inflammatory response                   | 12/311  | 251/17046  | 0.00229 | 0.04315 | 0.03441 | NLRP6/GPER1/GSTP1/IL6/ISL1/SMAD3/NOV/PIK3CG/IL20RB/MASP1/PSMB4/NLRX1                                                                                                                                                                                                                                                                                                                                                                                                                                                                                                                                                                                               | 12  |
| GO:0022607 | cellular component assembly                           | 57/311  | 2152/17046 | 0.00229 | 0.04315 | 0.03441 | CDH3/CDH13/TCIRG1/SEPT9/PSIP1/APOA1BP/SCLT1/CTGF/WBP2NL/PATL2/TMEM17/EPHA3/PPM1E/MTOR/TENM4/GJB2/VPS4A/ANXA2/NRG1/ANXA6/HMGA1/ACADL/HSP90AA1/FMN1/HILS1/ACAT1/LLGL1/LOX/SMAD3/ME1/MAP3K1/NEDD9/PALM/ANGPT4/PLEC/LIMS2/BIN3/ACTR3B/PXN/SOX9/VAMP2/ACTC1/TNXB/TRAF1/TWIST1/FZD5/COLQ/HIST1H2BM/HIST1H3A/PARD6B/GAS7/FADD/LIMD1/H2AFY/ARHGEF10/ULK2/USP6NL                                                                                                                                                                                                                                                                                                            | 57  |
| GO:0030814 | regulation of cAMP metabolic process                  | 8/311   | 127/17046  | 0.0023  | 0.04315 | 0.03441 | NPFFR2/ADRB3/DRD4/GABBR1/GNAS/GPER1/HPCA/PALM                                                                                                                                                                                                                                                                                                                                                                                                                                                                                                                                                                                                                      | 8   |
| GO:0060284 | regulation of cell development                        | 25/311  | 739/17046  | 0.00231 | 0.04315 | 0.03441 | TBR1/UNC13D/EPHA3/SPG20/TENM4/GPER1/HOXB3/HOXD3/BARHL2/IL6/ISL1/SMAD3/MFI2/NTF3/PALM/LEF1/PRKD1/SFRP2/SOX9/TWIST1/YWHAG/PAX8/CXCR4/SCRT1/ULK2                                                                                                                                                                                                                                                                                                                                                                                                                                                                                                                      | 25  |
| GO:0003382 | epithelial cell morphogenesis                         | 5/311   | 51/17046   | 0.00231 | 0.04315 | 0.03441 | FRMD6/FLNB/MAP3K1/PAX8/COL18A1                                                                                                                                                                                                                                                                                                                                                                                                                                                                                                                                                                                                                                     | 5   |
| GO:0051350 | negative regulation of lyase activity                 | 4/311   | 31/17046   | 0.00232 | 0.04315 | 0.03441 | DRD4/GABBR1/HPCA/PALM                                                                                                                                                                                                                                                                                                                                                                                                                                                                                                                                                                                                                                              | 4   |
| GO:1902742 | apoptotic process involved in development             | 4/311   | 31/17046   | 0.00232 | 0.04315 | 0.03441 | CYR61/LEF1/PAX8/FZD5                                                                                                                                                                                                                                                                                                                                                                                                                                                                                                                                                                                                                                               | 4   |

|            |                                                          |        |            |         |         |         |                                                                                                                                                                                                                                                                                                                                                                                                                                                                             |    |
|------------|----------------------------------------------------------|--------|------------|---------|---------|---------|-----------------------------------------------------------------------------------------------------------------------------------------------------------------------------------------------------------------------------------------------------------------------------------------------------------------------------------------------------------------------------------------------------------------------------------------------------------------------------|----|
| GO:0023056 | positive regulation of signaling                         | 42/311 | 1467/17046 | 0.00232 | 0.04315 | 0.03441 | CDH3/TSPAN5/CDH13/HCS/CTGF/ADRB3/DRD4/ECE1/EGFR/RASA3/MTOR/GNAS/GPER1/NRG1/CYR61/IL6/ISL1/LCK/SMAD3/MAP3K1/NOV/NTF3/PIK3CG/ZDHHC13/LIMS2/PRKD1/PSMB4/CCAR2/PXN/RASGRF2/S100A4/CCL17/SFRP2/SOX9/VAMP2/TLR5/YWHAG/CXCR4/FZD5/SLA2/FADD/LY86                                                                                                                                                                                                                                   | 42 |
| GO:0042327 | positive regulation of phosphorylation                   | 30/311 | 946/17046  | 0.00232 | 0.04315 | 0.03441 | ADCY3/CTGF/ADRB3/DRD4/EGFR/RASA3/MTOR/GAPDHS/GPER1/DOK7/ANXA2/NRG1/CYR61/IL6/ISL1/LCK/MAP3K1/NTF3/ANGPT4/PIK3CG/PRKD1/PSMB4/PXN/RASGRF2/CCL17/SFRP2/SOX9/STK10/CXCR4/FZD5                                                                                                                                                                                                                                                                                                   | 30 |
| GO:1903055 | positive regulation of extracellular matrix organization | 3/311  | 15/17046   | 0.00233 | 0.04315 | 0.03441 | SMAD3/MFI2/SOX9                                                                                                                                                                                                                                                                                                                                                                                                                                                             | 3  |
| GO:0031324 | negative regulation of cellular metabolic process        | 57/311 | 2154/17046 | 0.00234 | 0.04318 | 0.03443 | C1D/ZBTB18/RNF168/NLRP6/DNMT3A/DRD4/PATL2/PPM1E/ACIN1/FOXO1/MTOR/GABBR1/DKK3/GPER1/GSTP1/GZMA/ANXA2/SERPIND1/NRG1/HMGA1/HPCA/HOXB3/HOXC6/ACADL/COL28A1/IL6/ISL1/ITIH3/HILS1/SMAD3/NTF3/PALM/LEF1/PIK3CG/PRMT6/MASP1/PSMB4/METTL14/CCAR2/SFRP2/SOX9/TBP/TIMP3/TWIST1/YWHAG/ZNF177/ZC3H14/SCRT1/HIST1H3A/SLA2/SPINK7/KDM2B/LOXL3/CBX2/FADD/LIMD1/H2AFY                                                                                                                        | 57 |
| GO:0051960 | regulation of nervous system development                 | 23/311 | 660/17046  | 0.00237 | 0.04348 | 0.03468 | TBR1/EPHA3/SPG20/MTOR/TENM4/GPER1/NRG1/HOXB3/HOXD3/BARHL2/IL6/ISL1/NTF3/PALM/CEND1/PRKD1/SFRP2/SOX9/YWHAG/CXCR4/COLQ/SCRT1/ULK2                                                                                                                                                                                                                                                                                                                                             | 23 |
| GO:0006355 | regulation of transcription, DNA-templated               | 79/311 | 3210/17046 | 0.00237 | 0.04348 | 0.03468 | CDH13/C1D/ZBTB18/DMRT2/TBR1/PSIP1/ZBED9/CIDEA/ZFP42/ZNF709/ZNF781/CITED4/RNF168/DNMT3A/EGFR/EGR3/SP8/XRN2/FOXO1/SPG20/MTOR/DKK3/GPER1/ZBTB44/GT F2B/BRF1/NRG1/HLX/HMGA1/HOXB3/HOXC5/HOXC6/HOXD3/BARHL2/CYR61/IL6/ISL1/HILS1/SMAD3/MEF2D/MEOX1/MEOX2/NFYB/NTF3/LEF1/RIPK4/CYTL1/POMC/BNC2/PRMT 6/ZNF532/CNOT11/PRKD1/CCAR2/SFRP2/SGK1/SOX9/TAF4B/TBP/TCEA1/TLE3/TRAF1/TWIST1/ZNF124/ZNF177/PAX8/FZD5/ZNF606/SCRT1/HIST1H3A/SLA2/KDM2B/LOXL3/CBX2/ GAS7/FADD/LIMD1/LDB2/H2AFY | 79 |
| GO:0040017 | positive regulation of locomotion                        | 15/311 | 357/17046  | 0.00243 | 0.0444  | 0.03541 | CDH13/EGFR/GPER1/CYR61/IL6/SMAD3/NTF3/LEF1/ANGPT4/PRKD1/SOX9/TWIST1/PTP4A1/COL18A1/FADD                                                                                                                                                                                                                                                                                                                                                                                     | 15 |
| GO:0051241 | negative regulation of multicellular organismal process  | 29/311 | 908/17046  | 0.00247 | 0.04475 | 0.03568 | CDH3/CIDEA/ADRB3/TRPV3/VASH1/SPG20/GNAS/GSTP1/ANXA2/HLX/IL6/ISL1/SMAD3/NOV/LEF1/CEND1/ANGPT4/PIK3CG/IL20RB/POMC/LIMS2/SFRP2/SOX9/TWIST1/PAX8/NLR X1/RAB11FIP1/LIMD1/ULK2                                                                                                                                                                                                                                                                                                    | 29 |
| GO:0051128 | regulation of cellular component organization            | 52/311 | 1928/17046 | 0.0025  | 0.04475 | 0.03568 | CDH13/TBR1/CIDEA/CTGF/COCH/PATL2/UNC13D/EPHA3/PPM1E/SPG20/MTOR/GLS2/VPS4A/GPER1/ANXA2/NRG1/HMGA1/HPCA/FMN1/BARHL2/CYR61/IL6/ISL1/SMAD3/MAP3K 1/MFI2/NOV/NTF3/PALM/LEF1/PIWIL2/PRKD1/BIN3/ACTR3B/CCAR2/PXN/SFRP2/SGK1/SOX9/TWIST1/YWHAG/PAX8/FZD5/COLQ/SH3BGL3/MGARP/GAS7/LIMD1/H2AFY/ARHGE F10/ULK2/USP6NL                                                                                                                                                                  | 52 |
| GO:0042303 | molting cycle                                            | 7/311  | 101/17046  | 0.00251 | 0.04475 | 0.03568 | CDH3/APCDD1/TRPV3/EGFR/GNAS/SOX9/LDB2                                                                                                                                                                                                                                                                                                                                                                                                                                       | 7  |
| GO:0042633 | hair cycle                                               | 7/311  | 101/17046  | 0.00251 | 0.04475 | 0.03568 | CDH3/APCDD1/TRPV3/EGFR/GNAS/SOX9/LDB2                                                                                                                                                                                                                                                                                                                                                                                                                                       | 7  |
| GO:0043200 | response to amino acid                                   | 7/311  | 101/17046  | 0.00251 | 0.04475 | 0.03568 | CTGF/DNMT3A/EGFR/MTOR/HPCA/IL6/TIMP3                                                                                                                                                                                                                                                                                                                                                                                                                                        | 7  |
| GO:0060828 | regulation of canonical Wnt signaling pathway            | 11/311 | 221/17046  | 0.00252 | 0.0449  | 0.0358  | FOXO1/DKK3/ISL1/SMAD3/LEF1/PSMB4/CCAR2/SFRP2/SOX9/FZD5/LIMD1                                                                                                                                                                                                                                                                                                                                                                                                                | 11 |
| GO:0050673 | epithelial cell proliferation                            | 14/311 | 323/17046  | 0.00254 | 0.04496 | 0.03585 | CDH3/CDH13/EGFR/EGR3/VASH1/MTOR/IL6/SMAD3/NOV/LIMS2/PRKD1/SFRP2/SOX9/TWIST1                                                                                                                                                                                                                                                                                                                                                                                                 | 14 |
| GO:0060429 | epithelium development                                   | 32/311 | 1037/17046 | 0.00255 | 0.04505 | 0.03592 | CDH3/DMRT2/FRMD6/APCDD1/CTGF/EGFR/FLNB/GNAS/NRG1/FMN1/CYR61/IL6/ACAT1/KRT15/INSC/SMAD3/MAP3K1/MEOX1/MEOX2/NTF3/LEF1/RIPK4/PXN/SFRP2/SOX9/TWI ST1/PAX8/FZD5/COL18A1/KDM2B/LDB2/H2AFY                                                                                                                                                                                                                                                                                         | 32 |
| GO:0014706 | striated muscle tissue development                       | 14/311 | 324/17046  | 0.00261 | 0.04585 | 0.03656 | ZBTB18/COL11A1/FLNB/TENM4/NRG1/HLX/ISL1/SMAD3/MEF2D/MEOX2/LEF1/BIN3/ACTC1/TWIST1                                                                                                                                                                                                                                                                                                                                                                                            | 14 |

|                                                |                                                     |           |            |         |          |         |                                                                                                                                                                                                                                                                                                                                                                                                                                                                                                                                                                                                                                                                                                       |       |
|------------------------------------------------|-----------------------------------------------------|-----------|------------|---------|----------|---------|-------------------------------------------------------------------------------------------------------------------------------------------------------------------------------------------------------------------------------------------------------------------------------------------------------------------------------------------------------------------------------------------------------------------------------------------------------------------------------------------------------------------------------------------------------------------------------------------------------------------------------------------------------------------------------------------------------|-------|
| GO:0048015                                     | phosphatidylinositol-mediated signaling             | 10/311    | 190/17046  | 0.00262 | 0.04585  | 0.03656 | HCST/EGFR/FOXO1/MTOR/GPER1/NRG1/LCK/PIK3CG/SOX9/TWIST1                                                                                                                                                                                                                                                                                                                                                                                                                                                                                                                                                                                                                                                | 10    |
| GO:0001934                                     | positive regulation of protein phosphorylation      | 29/311    | 913/17046  | 0.00268 | 0.04663  | 0.03718 | ADCY3/CTGF/ADRB3/DRD4/EGFR/RASA3/MTOR/GPER1/DOK7/ANXA2/NRG1/CYR61/IL6/ISL1/LCK/MAP3K1/NTF3/ANGPT4/PIK3CG/PRKD1/PSMB4/PXN/RASGRF2/CCL17/SFRP2/SOX9/STK10/CXCR4/FZD5                                                                                                                                                                                                                                                                                                                                                                                                                                                                                                                                    | 29    |
| GO:0010556                                     | regulation of macromolecule biosynthetic process    | 87/311    | 3621/17046 | 0.00272 | 0.04727  | 0.03769 | CDH13/C1D/ZBTB18/DMRT2/TBR1/PSIP1/ZBED9/CIDEA/ZFP42/CTGF/ZNF709/ZNF781/CITED4/RNF168/DNMT3A/EGFR/EGR3/PATL2/SP8/XRN2/FOXO1/SPG20/LARP1/MTOR/DKK3/GPER1/ZBTB44/GSTP1/GTF2B/BRF1/NRG1/HLX/HMGA1/HOXB3/HOXC5/HOXC6/HOXD3/BARHL2/CYR61/IL6/ISL1/HILS1/LTB/SMAD3/MEF2D/MEOX1/MEOX2/NFYB/NTF3/LEF1/RIPK4/CYTL1/POMC/BNC2/PIWIL2/PRMT6/ZNF532/CNOT11/PRKD1/METTL14/CCAR2/SFRP2/SGK1/SOX9/TAF4B/TBP/TCEA1/TLE3/TRAFF1/TWIST1/VARS/ZNF124/ZNF177/PAX8/FZD5/ZNF606/SCRT1/HIST1H3A/SLA2/KDM2B/LOXL3/CBX2/GAS7/FADD/LIMD1/LDB2/H2AFY                                                                                                                                                                              | 87    |
| GO:1903506                                     | regulation of nucleic acid-templated transcription  | 79/311    | 3227/17046 | 0.00275 | 0.04749  | 0.03787 | CDH13/C1D/ZBTB18/DMRT2/TBR1/PSIP1/ZBED9/CIDEA/ZFP42/ZNF709/ZNF781/CITED4/RNF168/DNMT3A/EGFR/EGR3/SP8/XRN2/FOXO1/SPG20/MTOR/DKK3/GPER1/ZBTB44/GTF2B/BRF1/NRG1/HLX/HMGA1/HOXB3/HOXC5/HOXC6/HOXD3/BARHL2/CYR61/IL6/ISL1/HILS1/SMAD3/MEF2D/MEOX1/MEOX2/NFYB/NTF3/LEF1/RIPK4/CYTL1/POMC/BNC2/PRMT6/ZNF532/CNOT11/PRKD1/CCAR2/SFRP2/SGK1/SOX9/TAF4B/TBP/TCEA1/TLE3/TRAFF1/TWIST1/ZNF124/ZNF177/PAX8/FZD5/ZNF606/SCRT1/HIST1H3A/SLA2/KDM2B/LOXL3/CBX2/GAS7/FADD/LIMD1/LDB2/H2AFY                                                                                                                                                                                                                             | 79    |
| GO:0001916                                     | positive regulation of T cell mediated cytotoxicity | 3/311     | 16/17046   | 0.00282 | 0.04861  | 0.03876 | HLA-B/HLA-E/FADD                                                                                                                                                                                                                                                                                                                                                                                                                                                                                                                                                                                                                                                                                      | 3     |
| GO:0051093                                     | negative regulation of developmental process        | 24/311    | 710/17046  | 0.00284 | 0.04861  | 0.03876 | CDH3/ADRB3/VASH1/FOXO1/SPG20/GNAS/GPER1/HLX/IL6/ISL1/SMAD3/MFI2/NOV/LEF1/CEND1/ANGPT4/LIMS2/CCL17/SFRP2/SOX9/TWIST1/PAX8/LIMD1/ULK2                                                                                                                                                                                                                                                                                                                                                                                                                                                                                                                                                                   | 24    |
| GO:0010647                                     | positive regulation of cell communication           | 42/311    | 1485/17046 | 0.0029  | 0.04948  | 0.03946 | CDH3/TSPAN5/CDH13/HCST/CTGF/ADRB3/DRD4/EGFR/RASA3/LARP1/MTOR/GNAS/GPER1/NRG1/CYR61/IL6/ISL1/LCK/SMAD3/MAP3K1/NOV/NTF3/PIK3CG/ZDHHC13/LIMS2/PRKD1/PSMB4/CCAR2/PXN/RASGRF2/S100A4/CCL17/SFRP2/SOX9/VAMP2/TLR5/YWHAG/CXCR4/FZD5/SLA2/FADD/LY86                                                                                                                                                                                                                                                                                                                                                                                                                                                           | 42    |
| GO:0009892                                     | negative regulation of metabolic process            | 62/311    | 2412/17046 | 0.00292 | 0.04965  | 0.03959 | C1D/ZBTB18/CIDEA/CTGF/RNF168/NLRP6/DNMT3A/DRD4/EGFR/PATL2/PPM1E/ACIN1/FOXO1/MTOR/GABBR1/DKK3/GPER1/GSTP1/GZMA/ANXA2/SERPIND1/NRG1/HMGA1/HPCA/HOXB3/HOXC5/HOXC6/ACADL/COL28A1/IL6/ISL1/ITIH3/HILS1/SMAD3/NTF3/PALM/LEF1/PIK3CG/PIWIL2/PRMT6/CNOT11/MASP1/PSMB4/METTL14/CCAR2/SFRP2/SOX9/TBP/TIMP3/TWIST1/YWHAG/ZNF177/ZC3H14/SCRT1/HIST1H3A/SLA2/SPINK7/KDM2B/LOXL3/CBX2/FADD/LIMD1/H2AFY                                                                                                                                                                                                                                                                                                              | 62    |
| GO:0048017                                     | inositol lipid-mediated signaling                   | 10/311    | 193/17046  | 0.00293 | 0.04971  | 0.03964 | HCST/EGFR/FOXO1/MTOR/GPER1/NRG1/LCK/PIK3CG/SOX9/TWIST1                                                                                                                                                                                                                                                                                                                                                                                                                                                                                                                                                                                                                                                | 10    |
| GO:0006139                                     | nucleobase-containing compound metabolic process    | 116/311   | 5102/17046 | 0.00295 | 0.04974  | 0.03966 | CDH13/MBNL2/TCIRG1/C1D/ZBTB18/DMRT2/CELF2/TBR1/NPFFR2/ADCY3/PSIP1/ZBED9/CIDEA/APOA1BP/ZFP42/CTGF/ADRB3/ADAL/ZNF709/ZNF781/CITED4/RNF168/DNMT3A/DRD4/EGFR/EGR3/PATL2/SP8/XRN2/ACIN1/FOXO1/MTOR/GABBR1/GAPDHS/AMPD2/DKK3/GLS2/GNAS/GPER1/ZBTB44/GTF2B/BRF1/NME7/GZMA/NRG1/HLX/HMGA1/HPCA/HOXB3/HOXC5/HOXC6/HOXD3/BARHL2/CYR61/IL6/ISL1/HILS1/SMAD3/ME1/MEF2D/MEOX1/MEOX2/NUDT1/NFYB/NTF3/PALM/LEF1/DDX47/PDE4C/PDE7A/PGAM2/RIPK4/CYTL1/POMC/MOV10L1/BNC2/PIWIL2/PRMT6/ZNF532/WDR33/CNOT11/PRKD1/METTL14/CCAR2/RPL8/RPL29/SFRP2/TRA2B/SGK1/SOX9/TAF4B/TBP/TCEA1/TLE3/TRAFF1/TWIST1/UUP1/VARS/YWHAG/ZNF124/ZNF177/PAX8/FZD5/ZC3H14/ZNF606/SCRT1/HIST1H3A/SLA2/KDM2B/LOXL3/CBX2/GAS7/FADD/LIMD1/LDB2/H2AFY | 116   |
| <b>Hypermethylated DMC, Cellular Component</b> |                                                     |           |            |         |          |         |                                                                                                                                                                                                                                                                                                                                                                                                                                                                                                                                                                                                                                                                                                       |       |
|                                                | Description                                         | GeneRatio | BgRatio    | pvalue  | p.adjust | qvalue  | geneID                                                                                                                                                                                                                                                                                                                                                                                                                                                                                                                                                                                                                                                                                                | Count |

|                                                             |                        |           |             |          |          |          |                                                                                                                                                                                                                                                                                                                                                                                                                                                                                                                                                                                                                                                                                                                                                                                                                                                                                                                                                                                                                                                                                                                                                                                                                                                                                                                                                                                                                                                                                                                                                                                                                                                                                                                                                                                                                                                                                                                                                                                                                                                                                                                                                              |       |
|-------------------------------------------------------------|------------------------|-----------|-------------|----------|----------|----------|--------------------------------------------------------------------------------------------------------------------------------------------------------------------------------------------------------------------------------------------------------------------------------------------------------------------------------------------------------------------------------------------------------------------------------------------------------------------------------------------------------------------------------------------------------------------------------------------------------------------------------------------------------------------------------------------------------------------------------------------------------------------------------------------------------------------------------------------------------------------------------------------------------------------------------------------------------------------------------------------------------------------------------------------------------------------------------------------------------------------------------------------------------------------------------------------------------------------------------------------------------------------------------------------------------------------------------------------------------------------------------------------------------------------------------------------------------------------------------------------------------------------------------------------------------------------------------------------------------------------------------------------------------------------------------------------------------------------------------------------------------------------------------------------------------------------------------------------------------------------------------------------------------------------------------------------------------------------------------------------------------------------------------------------------------------------------------------------------------------------------------------------------------------|-------|
| GO:0005575                                                  | cellular_compone<br>nt | 325/325   | 16277/17046 | 2.63E-07 | 0.00013  | 0.00011  | CDH3/CCDC180/TSPAN5/CDH13/MBNL2/KCNMB2/BCKDK/TCIRG1/ABCA9/C1D/ZBTB18/DMRT2/CELF2/TBR1/SEPT9/HCST/NPFFR2/ADCY3/SLC27A2/HIBADH/PSIP1/PXMP4/B4GAL<br>T7/PTH2/CHRNA5/CIDEA/ALPK2/CLCA1/FRMD6/C15orf27/ZG16B/SLC38A10/KRT40/APOA1BP/COL11A1/LYPD6B/GALM/SCLT1/ZFP42/CPD/TRPM6/LYSMD4/APCDD1/CTGF/LRRC3<br>4/CYB561/ADRB3/FITM1/ADAL/TRPV3/ZNF709/ZNF781/CITED4/WBP2NL/RNF168/COCH/NLRP6/DNAH8/DNMT3A/DRD4/DSG3/ECE1/EGFR/EGR3/PATL2/TMEM17/EML1/UNC13D<br>/DNAH12/EPHA3/EPHB4/ALAS1/RNF182/SP8/XRN2/RASA3/PPM1E/VASH1/ACIN1/TBC1D9B/FOXO1/SPG20/FLNB/SEL1L3/ATP11A/LARP1/MTOR/FUCA1/WDR27/GABBR1/NUTM1<br>/DSCR9/GAK/TENM4/FAM169A/RGS22/FBXO2/GAPDHS/GJA3/GJB2/AMPD2/SDCBP2/DKK3/GLS2/VPS4A/GPR162/GNAS/CRACR2B/PIGW/IZUMO1/GPER1/DOK7/DCBLD1/FLVCR1/<br>ZBTB44/GSTP1/GTF2B/BRF1/CCDC106/NME7/GZMA/ANXA2/SERPIND1/KCNIP2/NRG1/ANXA6/HLA-B/HLA-E/HLA-<br>F/HLX/HMGA1/HPCA/APBA2/HOXB3/HOXC5/HOXC6/HOXD3/HSD17B2/ACADL/HSP90AA1/HTR5A/COL28A1/MS4A10/FMN1/BARHL2/CYR61/IL6/ISL1/ITIH3/HILS1/ATP9B/KCP/AC<br>AT1/KRT7/KRT15/INSC/TOMMM20L/SLC6A17/RESP18/CDHR4/LCK/LLGL1/LOX/LTB/LTBP1/SMAD3/ME1/MEF2D/MAP3K1/MEOX1/MEOX2/MF12/MT1A/NUDT1/NEDD9/NFYB/NMBR<br>/NOV/NTF3/WRAP73/DEF6/PALM/ARHGEF3/LEF1/DDX47/CEND1/ANGPT4/PDE4C/PDE7A/GALNT7/PGAM2/PIGC/PIK3CG/SPA17/PLEC/IL20RB/RIPK4/CYTL1/POMC/PON1/MOV10<br>L1/ZDHH13/ROBO4/BNC2/LPCAT2/FAM118A/PPP1CC/PIWIL2/ARHGEF10L/PRMT6/ZNF532/WDR33/SMPD3/CNOT11/SYBU/LIMS2/VAC14/PRKD1/BIN3/PCDHGC4/PCDHGB7/PCD<br>HGA11/MASP1/PSMB4/TRPC7/LPAR5/ACTR3B/METTL14/CCAR2/PTPRCAP/PXN/RASGRF2/EXOC4/RPL8/DEFB134/CTXN3/RPL29/S100A4/S100A5/S100A6/CCL17/C19orf33/SFRP2/<br>CXCR5/TRA2B/SGK1/SYNDIG1L/MICAL1/CERK/SOX9/STK10/VAMP2/TAF4B/TBP/TCEA1/ACTC1/TIMP3/TLE3/TLR5/TRAPPC10/TNXB/TRAF1/TRPC4/PHLDA2/TWIST1/UPP1/VARS/Y<br>WHAG/ZNF124/ZNF177/PTP4A1/CACNB2/PAX8/CXCR4/FZD5/REEP5/GDPD3/TMEM204/NLRX1/ZMYM1/EPHX3/ZC3H14/ZNF606/RAB11FIP1/RNF39/COL18A1/UNC93B1/CAPS/CO<br>LQ/HIST1H2BM/SH3BGL3/GSG1/SCRT1/HIST1H3A/SLA2/PARD6B/IL1F10/SPINK7/KDM2B/LOXL3/MGARP/CBX2/GAS7/FADD/LIMD1/MAP7/ZFAND2A/LDB2/SMGT1/RCS1/IL32/R<br>EEP6/SDR42E1/TBC1D31/ARHGAP29/LY86/RAB3D/H2AFY/MTL5/ARHGEF10/ULK2/USP6NL/TELO2/RABGAP1L/TMCC2 | 325   |
| GO:0005769                                                  | early endosome         | 16/325    | 266/17046   | 5.44E-05 | 0.0133   | 0.01154  | ECE1/EGFR/EPHA3/ATP11A/VPS4A/GPER1/ANXA2/HLA-B/HLA-E/HLA-F/LLGL1/VAC14/PTP4A1/CXCR4/FZD5/RABGAP1L                                                                                                                                                                                                                                                                                                                                                                                                                                                                                                                                                                                                                                                                                                                                                                                                                                                                                                                                                                                                                                                                                                                                                                                                                                                                                                                                                                                                                                                                                                                                                                                                                                                                                                                                                                                                                                                                                                                                                                                                                                                            | 16    |
| GO:0031931                                                  | TORC1 complex          | 3/325     | 6/17046     | 0.00013  | 0.02145  | 0.01861  | LARP1/MTOR/TELO2                                                                                                                                                                                                                                                                                                                                                                                                                                                                                                                                                                                                                                                                                                                                                                                                                                                                                                                                                                                                                                                                                                                                                                                                                                                                                                                                                                                                                                                                                                                                                                                                                                                                                                                                                                                                                                                                                                                                                                                                                                                                                                                                             | 3     |
| GO:0030054                                                  | cell junction          | 37/325    | 1073/17046  | 0.00035  | 0.04268  | 0.03702  | CDH3/CDH13/CHRNA5/FRMD6/DSG3/EGFR/FLNB/GABBR1/GAK/GJA3/GJB2/GPER1/DOK7/ANXA6/HMGA1/HOXC5/FMN1/SLC6A17/LCK/NEDD9/NOV/PLEC/PPP1CC/LIMS2/PRKD1<br>/PXN/RPL8/VAMP2/ACTC1/TRPC4/YWHAG/CXCR4/FZD5/TMEM204/COLQ/PARD6B/LIMD1                                                                                                                                                                                                                                                                                                                                                                                                                                                                                                                                                                                                                                                                                                                                                                                                                                                                                                                                                                                                                                                                                                                                                                                                                                                                                                                                                                                                                                                                                                                                                                                                                                                                                                                                                                                                                                                                                                                                        | 37    |
|                                                             |                        |           |             |          |          |          |                                                                                                                                                                                                                                                                                                                                                                                                                                                                                                                                                                                                                                                                                                                                                                                                                                                                                                                                                                                                                                                                                                                                                                                                                                                                                                                                                                                                                                                                                                                                                                                                                                                                                                                                                                                                                                                                                                                                                                                                                                                                                                                                                              |       |
| <b>Hypermethyl<br/>ated DMC,<br/>Molecular<br/>Function</b> |                        |           |             |          |          |          |                                                                                                                                                                                                                                                                                                                                                                                                                                                                                                                                                                                                                                                                                                                                                                                                                                                                                                                                                                                                                                                                                                                                                                                                                                                                                                                                                                                                                                                                                                                                                                                                                                                                                                                                                                                                                                                                                                                                                                                                                                                                                                                                                              |       |
|                                                             | Description            | GeneRatio | BgRatio     | pvalue   | p.adjust | qvalue   | geneID                                                                                                                                                                                                                                                                                                                                                                                                                                                                                                                                                                                                                                                                                                                                                                                                                                                                                                                                                                                                                                                                                                                                                                                                                                                                                                                                                                                                                                                                                                                                                                                                                                                                                                                                                                                                                                                                                                                                                                                                                                                                                                                                                       | Count |
| GO:0003674                                                  | molecular_functio<br>n | 312/312   | 15274/17046 | 9.59E-16 | 6.31E-13 | 5.71E-13 | CDH3/TSPAN5/CDH13/MBNL2/KCNMB2/BCKDK/TCIRG1/ABCA9/C1D/ZBTB18/DMRT2/CELF2/TBR1/SEPT9/HCST/NPFFR2/ADCY3/SLC27A2/HIBADH/PSIP1/PXMP4/B4GALT7/ADPR<br>HL1/CHRNA5/ZBED9/PWWP2A/CIDEA/ALPK2/CLCA1/FRMD6/C15orf27/ZG16B/SLC38A10/KRT40/APOA1BP/COL11A1/GALM/SCLT1/ZFP42/CPD/TRPM6/APCDD1/CTGF/LRRC34/CY<br>B561/ADRB3/FITM1/ADAL/TRPV3/ZNF709/ZNF781/CITED4/WBP2NL/RNF168/RBM46/COCH/NLRP6/DNAH8/DNMT3A/DRD4/DSG3/ECE1/EGFR/EGR3/PATL2/EML1/UNC13D/ZBTB<br>7C/DNAH12/EPHA3/EPHB4/ALAS1/RNF182/SP8/XRN2/RASA3/RNF44/PPM1E/VASH1/ACIN1/LIMCH1/TBC1D9B/FOXO1/SPG20/FLNB/ATP11A/KLHL18/LARP1/MTOR/FUCA1/WDR2<br>7/GABBR1/NUTM1/DSCR9/GAK/TENM4/LTN1/RGS22/FBXO2/GAPDHS/GJA3/GJB2/AMPD2/SDCBP2/GLS2/VPS4A/GPR162/GNAS/CRACR2B/PIGW/IZUMO1/GPER1/DOK7/DCBLD1/<br>FLVCR1/ZBTB44/GSTP1/GTF2B/BRF1/CCDC106/NME7/GZMA/ANXA2/SERPIND1/KCNIP2/NRG1/ANXA6/HLA-B/HLA-E/HLA-<br>F/HLX/HMGA1/HPCA/APBA2/HOXB3/HOXC5/HOXC6/HOXD3/HSD17B2/ACADL/HSP90AA1/HTR5A/COL28A1/FMN1/BARHL2/CYR61/IL6/ISL1/ITIH3/HILS1/ATP9B/ACAT1/KRT7/KRT<br>15/SLC6A17/CDHR4/LCK/LLGL1/LOX/ZNF833P/LTB/LTBP1/SMAD3/ME1/MEF2D/MAP3K1/MEOX1/MEOX2/MF12/MT1A/NUDT1/NEDD9/NFYB/NMBR/NOV/NTF3/DEF6/PALM/ARH<br>GEF3/LEF1/DDX47/ANGPT4/PDE4C/PDE7A/GALNT7/PGAM2/PIGC/PIK3CG/SPA17/PLEC/IL20RB/RIPK4/CYTL1/POMC/PON1/MOV10L1/ZDHH13/ROBO4/BORCS6/BNC2/LPCAT2/F<br>AM118A/PPP1CC/PIWIL2/ARHGEF10L/PRMT6/ZNF532/WDR33/SMPD3/CNOT11/SYBU/LIMS2/VAC14/PRKD1/BIN3/PCDHGC4/PCDHGB7/PCDHGA11/MASP1/PSMB4/TRPC7/LPAR5<br>/ACTR3B/METTL14/CCAR2/PXN/RASGRF2/EXOC4/RPL8/RPL29/S100A4/S100A5/S100A6/CCL17/SFRP2/CXCR5/TRA2B/SGK1/MICAL1/CERK/SOX9/STK10/VAMP2/TAF4B/TBP/TCEA1<br>/ACTC1/TIMP3/TLE3/TLR5/TRAPPC10/TNXB/TRAF1/TRPC4/TWIST1/UPP1/VARS/ZNHIT2/YWHAG/ZNF124/ZNF177/PTP4A1/CACNB2/PAX8/CXCR4/FZD5/REEP5/GDPD3/NLRX1/ZM<br>YM1/EPHX3/ZC3H14/ZNF606/RAB11FIP1/RNF39/COL18A1/CAPS/COLQ/HIST1H2BM/SH3BGL3/GSG1/SCRT1/HIST1H3A/SLA2/PARD6B/IL1F10/SPINK7/KDM2B/LOXL3/MGARP/CB<br>X2/GAS7/FADD/LIMD1/THAP3/MAP7/ZFAND2A/LDB2/RCS1/IL32/REEP6/SDR42E1/ARHGAP29/RAB3D/H2AFY/MTL5/ARHGEF10/ULK2/USP6NL/TELO2/RABGAP1L/TMCC2                                                                                                   | 312   |



|            |                   |         |             |          |          |          |                                                                                                                                                                                                                                                                                                                                                                                                                                                                                                                                                                                                                                                                                                                                                                                                                                                                                                                                                                                                                                                                                                                                                                                                                                                                                                                                                                                                                                                                                                                                                                                                                                                                                                                                                                                                                                        |     |
|------------|-------------------|---------|-------------|----------|----------|----------|----------------------------------------------------------------------------------------------------------------------------------------------------------------------------------------------------------------------------------------------------------------------------------------------------------------------------------------------------------------------------------------------------------------------------------------------------------------------------------------------------------------------------------------------------------------------------------------------------------------------------------------------------------------------------------------------------------------------------------------------------------------------------------------------------------------------------------------------------------------------------------------------------------------------------------------------------------------------------------------------------------------------------------------------------------------------------------------------------------------------------------------------------------------------------------------------------------------------------------------------------------------------------------------------------------------------------------------------------------------------------------------------------------------------------------------------------------------------------------------------------------------------------------------------------------------------------------------------------------------------------------------------------------------------------------------------------------------------------------------------------------------------------------------------------------------------------------------|-----|
| GO:0005488 | binding           | 285/312 | 12915/17046 | 6.51E-13 | 2.14E-10 | 1.94E-10 | CDH3/TSPAN5/CDH13/MBNL2/BCKDK/TCIRG1/ABCA9/C1D/ZBTB18/DMRT2/CEL2/TBR1/SEPT9/HCST/NPFFR2/ADCY3/SLC27A2/HIBADH/PSIP1/PXMP4/B4GALT7/ADPRHL1/CHRN A5/ZBED9/PWWP2A/CIDEA/ALPK2/CLCA1/FRMD6/ZG16B/KRT40/APOA1BP/COL11A1/GALM/SCLT1/ZFP42/CPD/TRPM6/APCDD1/CTGF/CYB561/ADRB3/ADAL/ZNF709/ZNF781/W BP2NL/RNF168/RBM46/COCH/NLRP6/DNAH8/DNMT3A/DRD4/DSG3/ECE1/EGFR/EGR3/PATL2/EML1/UNC13D/ZBTB7C/DNAH12/EPHA3/EPHB4/ALAS1/RNF182/SP8/XRN2/RASA3/ RNF44/PPM1E/VASH1/ACIN1/LIMCH1/TBC1D9B/FOXO1/SPG20/FLNB/ATP11A/KLHL18/LARP1/MTOR/WDR27/GABBR1/NUTM1/GAK/TENM4/LTN1/FBXO2/GAPDHS/GJA3/AMPD2 /SDCBP2/GLS2/VPS4A/GNAS/CRACR2B/IZUMO1/GPER1/DOK7/DCBLD1/FLVCR1/ZBTB44/GSTP1/GTF2B/BRF1/CCDC106/NME7/GZMA/ANXA2/SERPIND1/KCNIP2/NRG1/ANXA6/HL A-B/HLA-E/HLA-F/HLX/HMGA1/HPCA/APBA2/HOXB3/HOXC5/HOXC6/HOXD3/ACADL/HSP90AA1/FMN1/BARHL2/CYR61/IL6/ISL1/HILS1/ATP9B/ACAT1/KRT7/KRT15/CDHR4/LCK/LLGL1/LOX/ZNF83 3P/LTB/LTBP1/SMAD3/ME1/MEF2D/MAP3K1/MEOX1/MEOX2/MFI2/MT1A/NUDT1/NEDD9/NFYB/NOV/NTF3/DEF6/PALM/ARHGEF3/LEF1/DDX47/ANGPT4/PDE4C/PDE7A/GALNT 7/PGAM2/PIK3CG/SPA17/PLEC/IL20RB/RIPK4/CYTL1/POMC/PON1/MOV10L1/ZDHHC13/BORCS6/BNC2/LPCAT2/FAM118A/PPP1CC/PIWIL2/PRMT6/ZNF532/WDR33/SMPD3/CNOT 11/SYBU/LIMS2/VAC14/PRKD1/BIN3/PCDHG4/PCDHGB7/PCDHGA11/MASP1/PSMB4/TRPC7/ACTR3B/METTL4/CCAR2/PXN/RASGRF2/EXOC4/RPL8/RPL29/S100A4/S100A5/S100 A6/CCL17/SFRP2/CXCR5/TRA2B/SGK1/MICAL1/CERK/SOX9/STK10/VAMP2/TAF4B/TBP/TCEA1/ACTC1/TIMP3/TLE3/TLR5/TRAPP10/TNXB/TRA1/TRPC4/TWIST1/VARS/ZNHIT2/Y WHAG/ZNF124/ZNF177/CACNB2/PAX8/CXCR4/FZD5/REEP5/GDPD3/NLRX1/ZMYM1/ZC3H14/ZNF606/RAB11FIP1/RNF39/COL18A1/CAPS/COLQ/CYTL1/POMC/HIST1H2BM/SH3BGL3/GSG1/SCR T1/HIST1H3A/SLA2/PARD6B/IL1F10/SPINK7/KDM2B/LOXL3/MGARP/CBX2/GAS7/FADD/LIMD1/THAP3/MAP7/ZFAND2A/LDB2/RCS21/IL32/REEP6/ARHGAP29/RAB3D/H2AFY/MTL 5/ARHGEF10/ULK2/USP6NL/TELO2/RABGAP1L/TMCC2 | 285 |
| GO:0005515 | protein binding   | 222/312 | 9755/17046  | 2.10E-07 | 4.60E-05 | 4.16E-05 | TSPAN5/CDH13/BCKDK/TCIRG1/C1D/ZBTB18/DMRT2/SEPT9/HCST/NPFFR2/ADCY3/SLC27A2/PSIP1/PXMP4/B4GALT7/CHRNA5/PWWP2A/CIDEA/FRMD6/KRT40/APOA1BP/COL11A 1/SCLT1/TRPM6/APCDD1/CTGF/CYB561/ADRB3/WBP2NL/RNF168/COCH/DNMT3A/DRD4/ECE1/EGFR/PATL2/EML1/UNC13D/EPHA3/EPHB4/ALAS1/RNF182/PPM1E/VASH1/ACIN1 /LIMCH1/TBC1D9B/FOXO1/SPG20/FLNB/ATP11A/KLHL18/LARP1/MTOR/WDR27/GABBR1/NUTM1/GAK/TENM4/LTN1/FBXO2/GAPDHS/GJA3/AMPD2/SDCBP2/GLS2/VPS4A/GNAS/ CRACR2B/IZUMO1/GPER1/DOK7/FLVCR1/ZBTB44/GSTP1/GTF2B/BRF1/CCDC106/NME7/GZMA/ANXA2/KCNIP2/NRG1/ANXA6/HLA-B/HLA-E/HLA-F/HLX/HMGA1/HPCA/APBA2/HOXD3/HSP90AA1/FMN1/BARHL2/CYR61/IL6/ISL1/HILS1/ACAT1/KRT7/KRT15/LCK/LLGL1/LOX/LTB/LTBP1/SMAD3/MEF2D/MAP3K1/MEOX1/MEOX2 /MFI2/MT1A/NUDT1/NEDD9/NFYB/NOV/NTF3/DEF6/PALM/ARHGEF3/LEF1/DDX47/ANGPT4/PDE4C/PIK3CG/SPA17/PLEC/IL20RB/RIPK4/CYTL1/POMC/PON1/BORCS6/FAM118A/P PP1CC/PRMT6/CNOT11/SYBU/LIMS2/VAC14/PRKD1/BIN3/MASP1/PSMB4/TRPC7/ACTR3B/CCAR2/PXN/RASGRF2/EXOC4/S100A4/S100A5/S100A6/CCL17/SFRP2/CXCR5/TRA2B/SG K1/MICAL1/CERK/SOX9/STK10/VAMP2/TAF4B/TBP/TCEA1/ACTC1/TIMP3/TLE3/TLR5/TRAPP10/TNXB/TRA1/TRPC4/TWIST1/VARS/YWHAG/ZNF124/ZNF177/CACNB2/PAX8/CXCR 4/FZD5/REEP5/NLRX1/ZMYM1/ZC3H14/RAB11FIP1/COL18A1/COLQ/HIST1H2BM/SH3BGL3/GSG1/HIST1H3A/SLA2/PARD6B/IL1F10/SPINK7/KDM2B/LOXL3/MGARP/CBX2/GAS7/F ADD/LIMD1/THAP3/MAP7/LDB2/RCS21/IL32/REEP6/ARHGAP29/RAB3D/H2AFY/ARHGEF10/ULK2/USP6NL/TELO2/RABGAP1L/TMCC2                                                                                                                                                                                                                                                                                                                                                                                                                        | 222 |
| GO:0043167 | ion binding       | 143/312 | 5637/17046  | 1.54E-06 | 0.00025  | 0.00023  | CDH3/CDH13/MBNL2/BCKDK/ABCA9/ZBTB18/DMRT2/SEPT9/ADCY3/SLC27A2/B4GALT7/ADPRHL1/CHRNA5/ALPK2/CLCA1/APOA1BP/COL11A1/ZFP42/CPD/TRPM6/CTGF/CYB561/ ADAL/ZNF709/ZNF781/RNF168/NLRP6/DNAH8/DNMT3A/DRD4/DSG3/ECE1/EGFR/EGR3/EML1/ZBTB7C/DNAH12/EPHA3/EPHB4/ALAS1/RNF182/SP8/XRN2/RASA3/RNF44/PPM1E/ LIMCH1/TBC1D9B/ATP11A/MTOR/GAK/LTN1/AMPD2/VPS4A/GNAS/CRACR2B/ZBTB44/GTF2B/BRF1/NME7/ANXA2/SERPIND1/KCNIP2/ANXA6/HPCA/ACADL/HSP90AA1/CYR61/ISL 1/ATP9B/ACAT1/CDHR4/LCK/LOX/ZNF833P/LTBP1/SMAD3/ME1/MAP3K1/MFI2/MT1A/NUDT1/NOV/DDX47/PDE4C/PDE7A/GALNT7/PIK3CG/RIPK4/PON1/MOV10L1/ZDHHC13/B NC2/LPCAT2/PPP1CC/ZNF532/SMPD3/LIMS2/PRKD1/PCDHG4/PCDHGB7/PCDHGA11/MASP1/TRPC7/ACTR3B/PXN/RPL29/S100A4/S100A5/S100A6/SGK1/MICAL1/CERK/STK10/V AMP2/TCEA1/ACTC1/TIMP3/TNXB/TRA1/TRPC4/VARS/ZNHIT2/ZNF124/ZNF177/GDPD3/NLRX1/ZMYM1/ZC3H14/ZNF606/RNF39/COL18A1/CAPS/SCRT1/KDM2B/LOXL3/LIMD1/T HAP3/ZFAND2A/ARHGAP29/RAB3D/MTL5/ULK2                                                                                                                                                                                                                                                                                                                                                                                                                                                                                                                                                                                                                                                                                                                                                                                                                                                                                                                | 143 |
| GO:0043169 | cation binding    | 105/312 | 3856/17046  | 4.59E-06 | 0.0006   | 0.00055  | CDH3/CDH13/MBNL2/ZBTB18/DMRT2/ADCY3/B4GALT7/ADPRHL1/CHRNA5/CLCA1/APOA1BP/COL11A1/ZFP42/CPD/TRPM6/CYB561/ADAL/ZNF709/ZNF781/RNF168/DNMT3A/DR D4/DSG3/ECE1/EGR3/EML1/ZBTB7C/RNF182/SP8/XRN2/RASA3/RNF44/PPM1E/LIMCH1/TBC1D9B/ATP11A/LTN1/AMPD2/GNAS/CRACR2B/ZBTB44/GTF2B/BRF1/NME7/ANXA2/KC NIP2/ANXA6/HPCA/ISL1/ATP9B/ACAT1/CDHR4/LOX/ZNF833P/LTBP1/SMAD3/ME1/MAP3K1/MFI2/MT1A/NUDT1/PDE4C/PDE7A/GALNT7/PON1/MOV10L1/ZDHHC13/BNC2/LPCAT 2/PPP1CC/ZNF532/SMPD3/LIMS2/PRKD1/PCDHG4/PCDHGB7/PCDHGA11/MASP1/PXN/S100A4/S100A5/S100A6/MICAL1/CERK/TCEA1/TIMP3/TRA1/ZNHIT2/ZNF124/ZNF177/G DPD3/ZMYM1/ZC3H14/ZNF606/RNF39/COL18A1/CAPS/SCRT1/KDM2B/LOXL3/LIMD1/THAP3/ZFAND2A/ARHGAP29/MTL5                                                                                                                                                                                                                                                                                                                                                                                                                                                                                                                                                                                                                                                                                                                                                                                                                                                                                                                                                                                                                                                                                                                                                    | 105 |
| GO:0046872 | metal ion binding | 103/312 | 3777/17046  | 5.61E-06 | 0.00061  | 0.00056  | CDH3/CDH13/MBNL2/ZBTB18/DMRT2/ADCY3/B4GALT7/ADPRHL1/CLCA1/APOA1BP/COL11A1/ZFP42/CPD/TRPM6/CYB561/ADAL/ZNF709/ZNF781/RNF168/DNMT3A/DSG3/ECE1/ EGR3/EML1/ZBTB7C/RNF182/SP8/XRN2/RASA3/RNF44/PPM1E/LIMCH1/TBC1D9B/ATP11A/LTN1/AMPD2/GNAS/CRACR2B/ZBTB44/GTF2B/BRF1/NME7/ANXA2/KCNIP2/ANXA6/H PCA/ISL1/ATP9B/ACAT1/CDHR4/LOX/ZNF833P/LTBP1/SMAD3/ME1/MAP3K1/MFI2/MT1A/NUDT1/PDE4C/PDE7A/GALNT7/PON1/MOV10L1/ZDHHC13/BNC2/LPCAT2/PPP1CC/ZNF 532/SMPD3/LIMS2/PRKD1/PCDHG4/PCDHGB7/PCDHGA11/MASP1/PXN/S100A4/S100A5/S100A6/MICAL1/CERK/TCEA1/TIMP3/TRA1/ZNHIT2/ZNF124/ZNF177/GDPD3/ZMYM1/ ZC3H14/ZNF606/RNF39/COL18A1/CAPS/SCRT1/KDM2B/LOXL3/LIMD1/THAP3/ZFAND2A/ARHGAP29/MTL5                                                                                                                                                                                                                                                                                                                                                                                                                                                                                                                                                                                                                                                                                                                                                                                                                                                                                                                                                                                                                                                                                                                                                                | 103 |
| GO:0005102 | receptor binding  | 42/312  | 1310/17046  | 0.00026  | 0.02482  | 0.02248  | C1D/HCST/NPFFR2/SLC27A2/CTGF/ADRB3/GNAS/IZUMO1/DOK7/GTF2B/NRG1/HLA-B/HLA-E/HLA-F/HMGA1/CYR61/IL6/ISL1/LCK/LTB/SMAD3/NOV/NTF3/PALM/LEF1/ANGPT4/PIK3CG/CYTL1/POMC/PXN/S100A4/CCL17/SFRP2/TLR5/TNXB/TRA1/YWHAG/SH3BGL3/IL1F10/FAD D/MAP7/IL32                                                                                                                                                                                                                                                                                                                                                                                                                                                                                                                                                                                                                                                                                                                                                                                                                                                                                                                                                                                                                                                                                                                                                                                                                                                                                                                                                                                                                                                                                                                                                                                             | 42  |
